# Supplementary material for: Association analysis of transcriptome and quasi-targeted metabolomics reveals the regulation mechanism underlying broiler muscle tissue development at different levels of dietary guanidinoacetic acid
Source: Frontiers journal article supplement (doi:10.3389/fvets.2024.1384028), 2024-04-25
Supplement: Data_Sheet_1.ZIP [file cor_pearson_all.xls]

R^2	all_QC1	all_QC2	all_QC3
all_QC1	1	0.994	0.988
all_QC2	0.994	1	0.992
all_QC3	0.988	0.992	1
