# Supplementary material for: Association analysis of transcriptome and quasi-targeted metabolomics reveals the regulation mechanism underlying broiler muscle tissue development at different levels of dietary guanidinoacetic acid
Source: Frontiers journal article supplement (doi:10.3389/fvets.2024.1384028), 2024-04-25

## KEGG pathway annotation

### Cellular Processes

Transport and catabolism

Cellular community – eukaryotes

Cell motility

Cell growth and death

### Environmental Information Processing

Signaling molecules and interaction

Signal transduction

Membrane transport

### Genetic Information Processing

Translation

Folding, sorting and degradation

### Metabolism

Xenobiotics biodegradation and metabolism

Nucleotide metabolism

Metabolism of terpenoids and polyketides

Metabolism of other amino acids

Metabolism of cofactors and vitamins

Lipid metabolism

Glycan biosynthesis and metabolism

Global and overview maps

Energy metabolism

Carbohydrate metabolism

Biosynthesis of other secondary metabolites

Amino acid metabolism

### Organismal Systems

Sensory system

Immune system

Endocrine system

Circulatory system

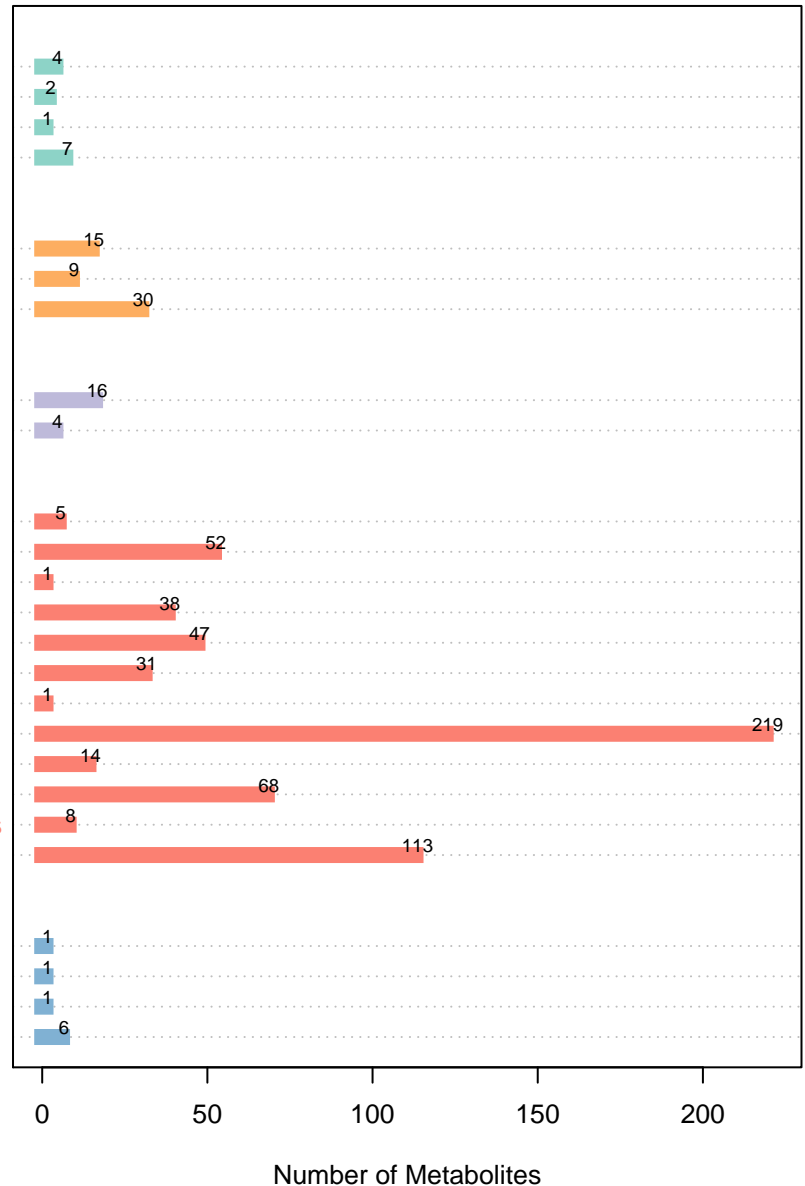

Supplement: Data_Sheet_1.ZIP [file Data_Sheet_1.ZIP]
