# Supplementary material for: Association analysis of transcriptome and quasi-targeted metabolomics reveals the regulation mechanism underlying broiler muscle tissue development at different levels of dietary guanidinoacetic acid
Source: Frontiers journal article supplement (doi:10.3389/fvets.2024.1384028), 2024-04-25
Supplement: Data_Sheet_1.ZIP [file Data_Sheet_1.ZIP]

## Result\_list-Software\_readme

### 1. 结果目录结构:

#### |-- 1.MetQuant-QC 【代谢物定性定量结果目录】

| |-- meta\_intensity\_all.xls 【所有代谢物定量结果列表】  
| |-- sam\_qc\_infor\_all.xls 【样本信息及总 PCA 图中样本编号信息】  
| |-- Samples\_QC\_all-PCA[.3D].{png,pdf} 【QC 及所有代谢样本的总 PCA 图】  
| |-- Samples\_QC\_all-pcaloading.{png,pdf} 【QC 及所有代谢样本总 PCA 图的载荷图】  
| |-- Samples\_all-PCA[.3D].{png,pdf} 【所有代谢样本的总 PCA 图】  
| |-- Samples\_all-pcaloading.{png,pdf} 【所有代谢样本总 PCA 图的载荷图】  
| |-- QC-TIC\_neg{pos}.png 【QC 及样本的 TIC 图】  
| |-- cor\_pearson\_all.{png,pdf,xls} 【QC 样本相关性分析结果】

#### |-- 2. MetAnnotation 【代谢物注释结果目录】

| -- KEGG 【基于 KEGG 数据库注释代谢物通路结果】  
  
| |--meta\_all\_kegg\_anno\_category.xls 【KEGG 通路注释结果】  
| |--meta\_all.KEGG.Anno. {png,pdf} 【KEGG 注释结果统计图】  
| ---meta\_all.KEGG.Anno.xls 【代谢物 KEGG 注释结果列表】  
| -- HMDB 【基于 HMDB 数据库注释代谢物分类结果】  
| |--meta\_all\_hmdb\_anno\_category.xls 【HMDB 分类注释结果】  
| |--meta\_all.HMDB.Anno.{png,pdf} 【HMDB 分类注释结果统计图】  
| -- meta\_all.HMDB.Anno.xls 【代谢物 HMDB 注释结果列表】  
| -- Lipidmaps 【基于 Lipidmaps 数据库注释代谢物分类结果】  
| |--meta\_all\_lipidmaps\_anno\_category.xls 【Lipidmaps 分类注释结果】  
| |--meta\_all.Lipidmaps.Anno.{png,pdf} 【Lipidmaps 分类注释结果统计图】  
| -- meta\_all.Lipidmaps.Anno.xls 【代谢物 Lipidmaps 注释结果列表】

#### |-- 3.MetDiffScreening 【差异代谢物筛选结果目录】

| -- \*.vs.\* 【样本比较对目录】  
| |-- \*.vs.\*\_all.xls 【样本比较对定量分析结果】  
| |-- \*.vs.\*\_all\_Diff.xls 【样本比较对差异代谢物分析】  
| |-- \*.vs.\*\_all-PCA[.3D].{png,pdf} 【样本比较对 PCA 分析】  
| |-- \*.vs.\*\_all-PCA-pcaloading.{png,pdf} 【样本比较对 PCA loading 分析】  
| |-- \*.vs.\*\_all-PLSDA-{score,valid}.{png,pdf} 【比较对 PLSDA 分析】  
| |-- \*.vs.\*\_all-PLSDA-loading.{png,pdf} 【比较对 PLSDA loading 分析】  
| |-- \*.vs.\*\_all.xls.volcano.{png,pdf} 【样本比较对火山图分析】

#### |-- 4.MetDiffAnalysis 【差异代谢物分析结果目录】

| -- Venn\_diff 【基于比较多的差异代谢物 venn 图】  
| |--Diff\_Venn\_all.{png,svg} 【总差异代谢物 venn 图】  
| -- Heatmap\_diff 【总差异代谢物热图结果】  
| |--Diff\_Heatmap\_all{cluster,cluster\_detail}.{png,pdf} 【总差异代谢物聚类热图】  
| |--Diff\_Heatmap\_all{detail}.{png,pdf} 【总差异代谢物不聚类热图】  
| -- \*.vs.\* 【比较的样本对目录】  
| |-- \*.vs.\*\_all.corr.xls 【差异代谢物相关性列表】  
| |-- \*.vs.\*\_all\_Pvalue.xls 【基于相关性分析的 p 值列表】

```

|-- *.vs.*_all_zscore.xls    【差异代谢物 zscore 分析列表】
|-- *.vs.*_all_zscore.{png,pdf}    【差异代谢物 z-score 图】
|-- |*.vs.*_all_cluster_heatmap[,_detail].{png,pdf}    【差异代谢物聚类热图】
|-- *.vs.*_all_heatmap[,_detail].{png,pdf}    【差异代谢物不聚类热图】
|-- *.vs.*_all_corr.{png,pdf}    【差异代谢物相关性分析图】
|-- ROC_all    【差异代谢物 ROC 曲线图】
|-- 5.MetKeggEnrichment    【差异代谢物 KEGG 富集分析结果目录】
|-- *.vs.*    【比较的样品对目录】
|   |-- *.vs.*_all.kegg_enrichment.xls    【差异代谢物 kegg 富集结果列表】
|   |-- *.vs.*_all.KEGG_Enrich.scatterplot.{png,pdf}    【kegg 富集气泡图】
|   |-- *.vs.*_all_KEGG_map    【kegg 通路图】
|--Met_results_dir.html    【网页版结果文件链接】
2. 分析过程使用的软件版本汇总

```

| 分析           | 内容                            | 软件       | 版本                   |
|--------------|-------------------------------|----------|----------------------|
| 代谢物定性定量      | 代谢物定性                         | Python   | Python-3.5.0         |
|              | 代谢物定量                         |          |                      |
| 数据质控         | QC样本质控                        | R        | R-3.4.3              |
|              | 总样品PCA分析                      |          |                      |
| 代谢物注释        | KEGG\HMDB\LIPIDMAPS           | python   | Python-2.7.6         |
|              |                               | R        | R-3.4.3              |
| 差异代谢物筛选      | 主成分分析 (PCA)                   | python、R | Python-3.5.0、R-3.4.3 |
|              | 偏最小二乘法判别分析 (PLS-DA)           |          |                      |
|              | 火山图                           |          |                      |
| 差异代谢物分析      | 差异代谢物Venn图分析                  |          |                      |
|              | 差异代谢物聚类分析                     |          |                      |
|              | 差异代谢物相关性分析                    |          |                      |
|              | Z-score分析                     |          |                      |
| KEGG富集分析     | KEGG富集                        | python   | Python-3.5.0         |
|              |                               | R        | R-3.4.3              |
| 差异代谢物ROC曲线分析 | ROC曲线                         | R        | R-3.4.3              |
| 关联分析         | 相关性分析                         | python   | Python-3.5.0         |
|              |                               | R        | R-3.4.3              |
|              | KEGG共有通路筛选                    | python   | Python-3.5.0         |
|              |                               | R        | R-3.4.3              |
| 备注           | 所有分析内容，数据处理主要用Python，图表绘制用R语言 |          |                      |
