# Supplementary material for: Association analysis of transcriptome and quasi-targeted metabolomics reveals the regulation mechanism underlying broiler muscle tissue development at different levels of dietary guanidinoacetic acid
Source: Frontiers journal article supplement (doi:10.3389/fvets.2024.1384028), 2024-04-25
Supplement: Data_Sheet_1.ZIP [file Data_Sheet_1.ZIP]

# No\_GAA.vs.Control\_all

Terms

Nicotinate and nicotinamide metabolism

Lysine degradation

Inositol phosphate metabolism

Glycine, serine and threonine metabolism

Fatty acid degradation

$-\log_{10}(\text{Pvalue})$

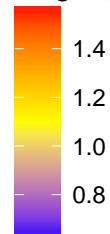

Number

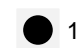

0.1

0.2

0.3

0.4

0.5

Ratio
