# Supplementary material for: Association analysis of transcriptome and quasi-targeted metabolomics reveals the regulation mechanism underlying broiler muscle tissue development at different levels of dietary guanidinoacetic acid
Source: Frontiers journal article supplement (doi:10.3389/fvets.2024.1384028), 2024-04-25
Supplement: Data_Sheet_1.ZIP [file Data_Sheet_1.ZIP]

## MetAnnotation Readme

### |-- 2. MetAnnotation 【代谢物注释结果目录】

#### |-- KEGG 【基于KEGG 数据库注释代谢物通路结果】

| |--meta\_all\_kegg\_anno\_category.xls 【KEGG 通路注释结果】  
| |--meta\_all.KEGG.Anno.{png,pdf} 【KEGG 注释结果统计图】  
| |--meta\_all.KEGG.Anno.xls 【代谢物KEGG 注释结果列表】

#### |-- HMDB 【基于HMDB 数据库注释代谢物分类结果】

| |--meta\_all\_hmdb\_anno\_category.xls 【HMDB 分类注释结果】  
| |--meta\_all.HMDB.Anno.{png,pdf} 【HMDB 分类注释结果统计图】  
| |--meta\_all.HMDB.Anno.xls 【代谢物HMDB 注释结果列表】

#### |-- Lipidmaps 【基于Lipidmaps 数据库注释代谢物分类结果】

| |--meta\_all\_lipidmaps\_anno\_category.xls 【Lipidmaps 分类注释结果】  
| |--meta\_all.Lipidmaps.Anno.{png,pdf} 【Lipidmaps 分类注释结果统计图】  
| |--meta\_all.Lipidmaps.Anno.xls 【代谢物Lipidmaps 注释结果列表】

### KEGG

#### meta\_all\_kegg\_anno\_category.xls

第一列: KO\_Pathway\_Level1, KEGG 数据库相应pathway 的第一层级名称;  
第二列: KO\_Pathway\_Level2, KEGG 数据库相应pathway 的第二层级名称;  
第三列: Meta\_Num, 对应第二层级中注释到的代谢物数目;  
第四列: Metabolites, 代谢物ID

#### meta\_all.KEGG.Anno.{png,pdf}

横坐标代表代谢物数目, 纵坐标代表注释到的KEGG 通路; 该图展示的是 pathway 一级分类各二级分类对应的代谢物数目。

#### meta\_all\_kegg\_anno.xls

第一列: ID, 代谢物 ID;  
第二列: Name, 代谢物英文名称;  
第三列: Kegg\_ID, 注释到的 kegg 数据库中对应的 ID;  
第四列: Kegg\_name, 代谢物在 kegg 数据库中对应的名称;  
第五列: formula, 代谢物分子式;  
第六列: Kegg\_map, 代谢通路对应的 mapID 和名称;

### HMDB

#### meta\_all\_hmdb\_anno\_category.xls

第一列: SuperClass, HMDB 中的二级分类, 如: 有机酸、脂类等类别;  
第二列: Metabolites\_nums, 该分类注释到的代谢物数目;  
第三列: Metabolites, 代谢物ID;  
第四列: Metabolite\_Descriptions, 代谢物描述。

#### meta\_all.HMDB.Anno.{png,pdf}

横坐标代表代谢物的数目, 纵坐标代表注释到的 HMDB 分类; 该图展示 HMDB 中二级分类(SuperClass)对应的代谢物数目。

#### meta\_all\_hmdb\_anno.xls

第一列: ID, 代谢物 ID;  
第二列: Name, 代谢物英文名称;

第三列: Formula, 代谢物分子式;  
第四列: HMDB\_ID, 代谢物在 HMDB 数据库中对应的 ID;  
第五列: Kingdom, 第一层级分类;  
第六列: SuperClass, 第二层级分类;  
第七列: Class, 第三层级分类;  
第八列: SubClass, 第四级分类;  
第九列: DirectParent, 化合物的化学类别;  
第十列: Source, 化合物来源;

## **Lipidmaps**

### **meta\_all\_lipidmaps\_anno\_category.xls**

第一列: CATEGORY, lipidmaps 分类信息 (八大类脂质);  
第二列: MAIN\_CLASS, 八大类下的主层级分类;  
第三列: Metabolites\_nums, MAIN\_CLASS 层级中注释到的代谢物数目;  
第四列: Metabolites, 代谢物 ID;  
第五列: Metabolite\_Descriptions, 代谢物描述;

### **meta\_all.Lipidmaps.Anno.{png,pdf}**

横坐标代表代谢物数目, 纵坐标代表注释到的LIPID MAPS 脂质分类; 该图展示的是LIPID MAPS 中8 大脂质分类 (Category) 下的主层级分类 (Main\_Class) 对应的 (脂质) 代谢物数目。

### **meta\_all\_lipidmaps\_anno.xls**

第一列: ID, 代谢物 ID;  
第二列: Name, 代谢物英文名称;  
第三列: Formula, 代谢物分子式;  
第四列: Lipidmaps\_ID, Lipidmaps 数据库中对应的 ID;  
第五列: COMMON\_NAME, 常用名;  
第五列: SYSTEMATIC\_NAME, 系统命名;  
第六列: SYNONYMS, 化合物同义名称;  
第七列: CATEGORY, 分类信息 (八大类脂质);  
第八列: MAIN\_CLASS, 八大类下的主层级分类;  
第九列: SUB\_CLASS, 主层级分类下的子类;
