# Supplementary material for: Association analysis of transcriptome and quasi-targeted metabolomics reveals the regulation mechanism underlying broiler muscle tissue development at different levels of dietary guanidinoacetic acid
Source: Frontiers journal article supplement (doi:10.3389/fvets.2024.1384028), 2024-04-25

## Lipidmaps annotation

### Fatty Acyls [FA]

Octadecanoids [FA02]

Fatty esters [FA07]

Fatty amides [FA08]

Fatty aldehydes [FA06]

Fatty Acids and Conjugates [FA01]

Eicosanoids [FA03]

### Glycerophospholipids [GP]

Glycerophosphoethanolamines [GP02]

Glycerophosphocholines [GP01]

### Prenol Lipids [PR]

Isoprenoids [PR01]

### Sterols [ST]

Sterols [ST01]

Steroids [ST02]

Steroid conjugates [ST05]

Bile acids and derivatives [ST04]

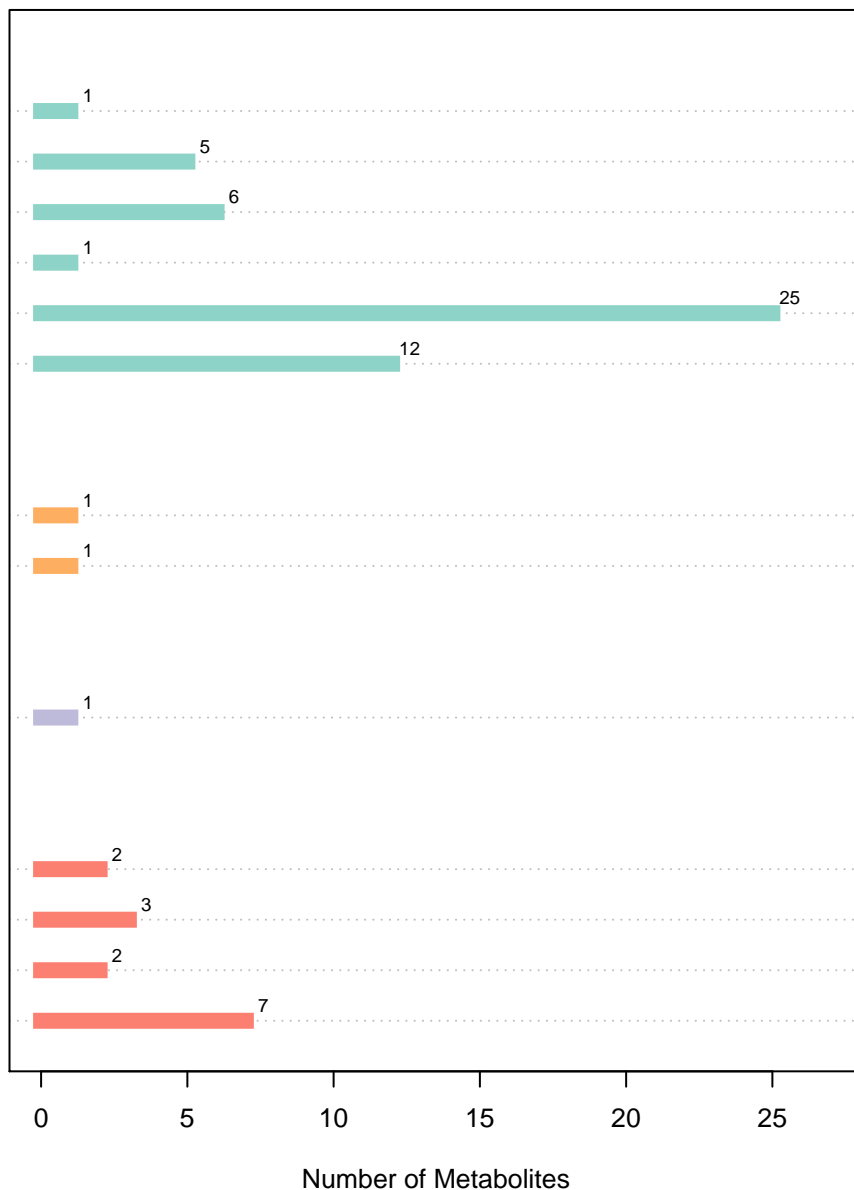

Supplement: Data_Sheet_1.ZIP [file Data_Sheet_1.ZIP]
