# Supplementary material for: Association analysis of transcriptome and quasi-targeted metabolomics reveals the regulation mechanism underlying broiler muscle tissue development at different levels of dietary guanidinoacetic acid
Source: Frontiers journal article supplement (doi:10.3389/fvets.2024.1384028), 2024-04-25
Supplement: Data_Sheet_1.ZIP [file Data_Sheet_1.ZIP]

## MetDiffAnalysis Readme

**-- 4.MetDiffAnalysis      【差异代谢物分析结果目录】**

| -- Venn\_diff      【基于比较对的差异代谢物 venn 图】

| | --Diff\_Venn\_all.{png,svg}      【差异代谢物 venn 图】

| -- Heatmap\_diff      【总差异代谢物热图结果】

| | --Diff\_Heatmap\_all{.cluster,cluster.detail}.{png,pdf}      【总差异代谢物聚类热图】

| | --Diff\_Heatmap\_all{.detail}.{png,pdf}      【总差异代谢物不聚类热图】

| -- \*.vs.\*      【比较的样本对目录】

| | -- \*.vs.\*\_all.corr.xls      【差异代谢物相关性列表】

| | -- \*.vs.\*\_all\_Pvalue.xls      【基于相关性分析的 p 值列表】

| | -- \*.vs.\*\_all\_zscore.xls      【差异代谢物 zscore 分析列表】

| | -- \*.vs.\*\_all\_cluster\_heatmap[,\_detail}.{png,pdf}      【差异代谢物聚类热图】

| | -- \*.vs.\*\_all\_heatmap[,\_detail}.{png,pdf}      【差异代谢物不聚类热图】

| | -- \*.vs.\*\_all\_corr.{png,pdf}      【差异代谢物相关性分析图】

| | -- \*.vs.\*\_all\_zscore.{png,pdf}      【差异代谢物 z-score 图】

| | -- ROC\_all      【差异代谢物 ROC 曲线图】

### Diff\_Heatmap\_Name\_all.xls

第一列: Compound\_ID, 代谢 ID;

第二列: Name, 代谢物名称;

第三列-倒数第一列: 样本对应的代谢物均值;

### \*.vs.\*\_all\_corr.xls

代谢物相关性分析表格;

### \*.vs.\*\_all\_Pvalue.xls

基于代谢物相关性分析的 P 值;

### \*.vs.\*\_all\_zscore.xls

代谢物 zscore 值表格;

### Diff\_Venn\_Intersection{ Union}.xls

Venn 图对应集合表格, “1” 表示该代谢物在对应比较对中是差异代谢物, “0” 则表示不是。

### Diff\_Heatmap\_all{.cluster,cluster\_detail}.{png,pdf}

总差异代谢物聚类热图: 对各比较对之间的差异代谢物进行层次聚类分析, 将差异代谢物相对定量值进行归一化转换并聚类。横向为代谢物的聚类, 纵向为样本分组, 聚类枝越短代表相似性越高。

### Diff\_Heatmap\_all{,\_detail}.{png,pdf}

总差异代谢物不聚类热图: 将差异代谢物相对定量值进行归一化转换。横向为代谢物的聚类, 纵向为样本分组。

### \*.vs.\*\_all\_cluster\_heatmap[,\_detail}.{png,pdf}

差异代谢物聚类热图: 对两组样本获得的差异代谢物进行层次聚类分析, 得出同一比较对两组之间和组内代谢表达模式的差异情况。横向为代谢物的聚类, 纵向为样本类型, 聚类枝越短代表相似性越高。

### \*.vs.\*\_all\_heatmap[,\_detail}.{png,pdf}

差异代谢物不聚类热图：将两组样本获得的差异代谢物相对定量值进行归一化转换，得出同一比较对两组之间和组内代谢表达模式的差异情况。横向为代谢物的聚类，纵向为样本类型。

**\*.vs.\*\_all\_corr.{png,pdf}**

差异代谢物相关性分析图：通过计算所有差异代谢物两两之间的皮尔逊相关系数，选取显著性水平 P-value 值从小到大排序的 Top20 的差异代谢物进行展示，可以查看代谢物与代谢物变化趋势的一致性。相关性最高为 1，为完全的正相关（红色），相关性最低为-1，为完全的负相关（蓝色），没有颜色的部分表示 P-value>0.05。

**\*.vs.\*\_all\_zscore.{png,pdf}**

差异代谢物 z-score 图：z-score（标准分数）是基于代谢物的相对含量转换而来的值，用于衡量同一水平面上代谢物的相对含量的高低。横坐标为 z-score 值，纵坐标为差异代谢物，每个圆圈代表一个样本。图中只展示了 Top30（按 p-value 值从小到大排序）的代谢物 Z-score 值。Z-score 超出 4 或-4 的样本无法展示。

**ROC\_all**

差异代谢物 ROC 曲线图：ROC 曲线又叫受试者工作特征曲线或感受性曲线，根据一系列不同的二分类方式（分界值或决定域）绘制的曲线，差异代谢物的 ROC 曲线可用来评判潜在的生物标记物。横坐标为假阳性率（1-特异度），纵坐标为真阳性率（灵敏度）。
