# Supplementary material for: Association analysis of transcriptome and quasi-targeted metabolomics reveals the regulation mechanism underlying broiler muscle tissue development at different levels of dietary guanidinoacetic acid
Source: Frontiers journal article supplement (doi:10.3389/fvets.2024.1384028), 2024-04-25
Supplement: Data_Sheet_1.ZIP [file Data_Sheet_1.ZIP]

Compound_ID	Name	Chinese name	RT [min]	Formula	Molecular Weight	Class(English)	Class(Chinese)	CAS	all_No_GAA_1	all_No_GAA_2	all_No_GAA_3	all_NC_1	all_NC_2	all_NC_3	FC	log2FC	Pvalue	ROC	VIP
Com_100_neg	alpha-Benzylsuccinic acid	¦Á-ÜÐ»ù¶¡¶þËá	0.71	C11H12O4	208.211	Organic Acid And Its Derivatives	ÓÐ»úËá¼°ÆäÑÜÉúÎï	"884-33-3"	177100	195300	211100	231300	203400	229500	0.878500451671183	-0.186885066908	0.120759961534611	0.888888888888889	1.77602139878021
Com_101_neg	6-Sialyllactose	6'-ÍÙÒºÈéÌÇ	0.73	C23H39NO19	633.551	Carbohydrates And Its Derivatives	ÌÇÀà¼°ÆäÑÜÉúÎï	"35890-39-2"	33840	39870	28300	24180	43160	30110	1.04679322729605	0.0659764953583	0.760452674313183	0.555555555555556	0.41485240598377
Com_102_neg	2-Hydroxyisocaproic Acid	2-ôÇ»ù-4-¼×»ùÎìËá	6.39	C6H12O3	132.158	Fatty Acyls	Ö¬·¾õ£Àà	"498-36-2"	14400	17680	20280	13190	6589	10480	1.73039426286394	0.791100787153	0.0870661411059688	1	2.11456924648718
Com_103_neg	Trehalose 6-phosphate	º£ÔåÌÇ-6-Á×Ëá	0.96	C12H23O14P	422.276	Carbohydrates And Its Derivatives	ÌÇÀà¼°ÆäÑÜÉúÎï	"4484-88-2"	309000	156700	120200	253300	351700	34270	0.916514148951147	-0.12577094193	0.803321427352681	0.555555555555556	0.349220812358955
Com_104_neg	Citicoline	°û¶þÁ×µ¨¼î	0.89	C14H26N4O11P2	488.324	Pyrimidines and pyrimidine derivatives	à×à¤¼°ÆäÑÜÉúÎï	"987-78-0"	25230	81250	36290	56090	31420	51970	1.02358761112704	0.0336345911049	0.870302153154199	0.555555555555556	0.400660079712031
Com_105_neg	Homotaurine	3-°±»ù±ûÍé»ÇËá	0.84	C3H9NO3S	139.17	Organic Acid And Its Derivatives	ÓÐ»úËá¼°ÆäÑÜÉúÎï	"3687-18-1"	16820	12030	11040	27840	16140	31040	0.531724873367102	-0.911248139574	0.0746221445657475	0.888888888888889	1.69313865606035
Com_106_neg	Allitol	ËâÌÇ´¼	0.91	C6H14O6	182.172	Sugar Alcohols	ÌÇ´¼	"488-44-8"	25170	28750	15640	9309	21530	13920	1.55410085122545	0.636080128483	0.204993224273824	0.888888888888889	1.16737915136837
Com_107_neg	scyllo-Inositol	ÇàÐ·¼¡´¼	0.853	C6H12O6	180.16	Carbohydrates And Its Derivatives	ÌÇÀà¼°ÆäÑÜÉúÎï	"488-59-5"	468900	353500	444800	430400	317000	494900	1.02004346776141	0.0286306319886	0.86280675482168	0.555555555555556	0.148585538901155
Com_108_neg	Succinic acid	çúçêËá	1.936	C4H6O4	118.09	Tca Cycle	ÈýôÈËáÑ­»·	"110-15-6"	18290000	19800000	12320000	7679000	18880000	12910000	1.27720489498087	0.352989987265	0.401406146676077	0.666666666666667	0.553099621768423
Com_109_neg	Thymidine	ÐØÜÕ	4.289	C10H14N2O5	242.23	Nucleotide And Its Derivates	ºËÜÕËá¼°ÆäÑÜÉúÎï	"50-89-5"	10570	12050	7837	9227	8875	12750	0.987196940230779	-0.0185901719567	0.934583167836527	0.444444444444444	0.10549051462572
Com_10_neg	5'-Adenylic acid	5'-ÏÙàÑßÊºËÜÕËá	1.036	C10H14N5O7P	347.221	Nucleotide And Its Derivates	ºËÜÕËá¼°ÆäÑÜÉúÎï	"61-19-8"	564100	6475000	6450000	1780000	6859000	6626000	0.883661971830986	-0.178433495436	0.686258497069679	0.777777777777778	0.441076967557138
Com_110_neg	Cytosine	°ûà×à¤	0.875	C4H5N3O	111.1	Nucleotide And Its Derivates	ºËÜÕËá¼°ÆäÑÜÉúÎï	"71-30-7"	56440	74300	53300	62850	59610	39580	1.13576894593927	0.183669371417	0.490853408274966	0.444444444444444	0.682641527161867
Com_111_neg	Xanthurenic Acid	»ÆÄòËá	4.977	C10H7NO4	205.17	Organic Acid And Its Derivatives	ÓÐ»úËá¼°ÆäÑÜÉúÎï	"59-00-7"	266800	307600	234000	266200	159000	190100	1.31383065171461	0.393779329179	0.18699256422313	0.888888888888889	1.56489637344827
Com_112_neg	cis-Aconitic acid	Ë³Ê½ÎÚÍ·Ëá	1.766	C6H6O6	174.11	Tca Cycle	ÈýôÈËáÑ­»·	"585-84-2"	53570	28540	30160	26950	29640	54670	1.00907783570016	0.0130374617065	0.954647514773323	0.555555555555556	0.367532239043003
Com_113_neg	Riboflavin-5-phosphate	2,6-Ýì¶þ·Ó	5.52	C17H21N4O9P	456.344	Nucleotide And Its Derivates	ºËÜÕËá¼°ÆäÑÜÉúÎï	"146-17-8"	13100	8250	6439	9106	7695	11320	0.98819387646243	-0.0171339790176	0.865026440256006	0.555555555555556	0.248633583474357
Com_114_neg	D-Glucopyranose	¦Â-D-ÆÏÌÑÌÇ	0.87	C6H12O6	180.156	Carbohydrates And Its Derivatives	ÌÇÀà¼°ÆäÑÜÉúÎï	"28905-12-6"	158400	166800	174200	153600	157100	180200	1.01731513546547	0.0247666545622	0.760710527935841	0.666666666666667	0.418116284218454
Com_115_neg	Prostaglandin I2	Ç°ÁÐÏÙËØI2	9.35	C20H32O5	352.465	Hormones	¼¤ËØ	"35121-78-9"	5153	23080	7577	5754	11370	52460	0.514629799954012	-0.958393095256	0.607718162071762	0.666666666666667	0.724791666139649
Com_116_neg	Pyruvic Acid	±ûÍªËá	1.78	C3H4O3	88.062	Tca Cycle	ÈýôÈËáÑ­»·	"127-17-3"	23460	30080	17590	23570	35310	19950	0.902321451224153	-0.148286610996	0.694801500774702	0.666666666666667	0.572389454487922
Com_117_neg	Pyrophosphate	½¹Á×Ëá	0.97	H4O7P2	177.975	Others	ÆäËü	"2466-09-3"	43660000	51300000	69940000	58720000	32380000	68300000	1.034504391468	0.048939769447	0.828368519562292	0.444444444444444	0.287317816100077
Com_118_neg	Prostaglandin G2	Ç°ÁÐÏÙËØG2	2.69	C20H32O6	368.465	Hormones	¼¤ËØ	"51982-36-6"	70480	382700	319700	297800	372400	196300	0.891956145412579	-0.164955315629	0.631955929696773	0.555555555555556	0.707246380911591
Com_119_neg	Phosphopyruvic acid	Á×Ï©´¼±ûÍªËá	1.03	C3H5O6P	168.042	Organic Acid And Its Derivatives	ÓÐ»úËá¼°ÆäÑÜÉúÎï		1198000	189300	188000	363800	310924	310800	1.59843900300754	0.676663691421	0.92656160307019	0.666666666666667	0.102771953845343
Com_11_neg	UMP	ÄòÜÕ-5-µ¥Á×Ëá	1.037	C9H13N2O9P	324.181	Nucleotide And Its Derivates	ºËÜÕËá¼°ÆäÑÜÉúÎï	"58-97-9"	467000	18830000	9057000	1843000	9908000	13000000	1.14556987596461	0.196065460941	0.794911531040899	0.555555555555556	0.376141928234431
Com_120_neg	1-Dodecanol	Ê®¶þ´¼	6.18	C12H26O	186.33	Fatty Acyls	Ö¬·¾õ£Àà	"112-53-8"	36150	28510	31350	30030	29610	35520	1.0089323245061	0.0128294069776	0.937323856410047	0.555555555555556	0.0681609969941916
Com_121_neg	Succinic anhydride	¶¡¶þËáôû	1.02	C4H4O3	100.07	Organic Acid And Its Derivatives	ÓÐ»úËá¼°ÆäÑÜÉúÎï	"108-30-5"	549900	515800	538200	815700	688500	1131000	0.608644505160899	-0.716328264769	0.08013918645035	1	2.21854182391284
Com_122_neg	Hydantoin-5-propionic acid	ÒÒÄÚõ£ëå-5-±ûËá	2.18	C6H8N2O4	172.14	Organoheterocyclic compounds	ÓÐ»úÔÓ»·»¯ºÏÎï	"5624-26-0"	2416000	2734000	557400	1710000	2059000	1533000	1.0764617125613	0.106297006844	0.827392770127233	0.666666666666667	0.291929968414612
Com_123_neg	Indoleacetaldehyde	ßÅßáÒÒÈ©	6.92	C10H9NO	159.18	Organoheterocyclic compounds	ÓÐ»úÔÓ»·»¯ºÏÎï	"2591-98-2"	3725	3746	3177	4626	3389	1753	1.09009009009009	0.124447370924	0.635748906623964	0.555555555555556	0.605767123931967
Com_124_neg	Dimethylmalonic acid	¶þ¼×»ù±û¶þËá	0.68	C5H8O4	132.11	Organic Acid And Its Derivatives	ÓÐ»úËá¼°ÆäÑÜÉúÎï	"595-46-0"	1272000	1108000	800300	781900	1356000	969000	1.02362483504458	0.0336870553827	0.890061575434582	0.555555555555556	0.429112928392974
Com_125_neg	Glucotropaeolin	½ðÁ«ÆÏÌÇÁòÜÕ	0.98	C14H19NO9S2	409.4	Carbohydrates And Its Derivatives	ÌÇÀà¼°ÆäÑÜÉúÎï	"499-26-3"	122500	76390	106700	100800	108500	131700	0.896158357771261	-0.158174405256	0.501173666602335	0.666666666666667	0.68699749661877
Com_126_neg	Diflunisal	¶þ·úÄáÁø	13.67	C13H8F2O3	250.2	Benzene and substituted derivatives	±½¼°ÆäÈ¡´úÑÜÉúÎï	"22494-42-4"	221300	224700	225300	220200	226600	224300	1.00029801817911	0.000429885295461	0.975128511800133	0.555555555555556	0.161483545599523
Com_127_neg	Hexadecanedioate	Ê®ÁùÍé¶þËá	11.86	C16H30O4	286.41	Fatty Acyls	Ö¬·¾õ£Àà	"505-54-4"	67550	69940	38060	54840	41260	62530	1.10666330454517	0.146216357848	0.751404845625958	0.666666666666667	0.38731375626402
Com_128_neg	Hydroxyhydroquinone	Æ«±½Èý·Ó	0.92	C6H6O3	126.11	Phenols And Its Derivatives	·ÓÀà¼°ÆäÑÜÉúÎï	"533-73-3"	98020	137200	158600	116200	104900	125100	1.13755054881571	0.185930655118	0.523084160430775	0.666666666666667	0.847580155960869
Com_129_neg	3-Phosphoglyceric acid	3-Á×Ëá¸ÊÓÍËá	1.03	C3H8NaO6P	194.056	Carbohydrates And Its Derivatives	ÌÇÀà¼°ÆäÑÜÉúÎï	"17603-42-8"	2011000	802800	213900	449400	199700	181600	3.64475743348983	1.86582280326	0.255399923037109	0.888888888888889	0.987882534018436
Com_12_neg	L-Threonine	L-ËÕ°±Ëá	0.888	C4H9NO3	119.12	Amino Acid And Its Derivatives	°±»ùËá¼°ÆäÑÜÉúÎï	"72-19-5"	94510	129100	116100	88850	34130	59510	1.86152665899501	0.896486277229	0.120496981419303	1	1.71109232646337
Com_130_neg	5,6-Dihydroxyindole-2-Carboxylic Acid	5,6-¶þôÇ»ùßÅßá-2-ôÈËá	18.52	C9H7NO4	193.156	Indole And Its Derivatives	ßÅßá¼°ÆäÑÜÉúÎï	"4790-08-3"	101000	122000	111800	122300	115900	114400	0.949517867271696	-0.0747329467698	0.430670196151206	0.777777777777778	0.838786414175274
Com_131_neg	4-Pyridoxic acid	4-ßÁà¤Ëá	2.94	C8H9NO4	183.161	Pyridine And Its Derivatives	ßÁà¤¼°ÆäÑÜÉúÎï	"82-82-6"	332900	269200	130400	630200	64310	73420	0.953862982303075	-0.0681460497768	0.611276572947394	0.666666666666667	0.835503699436244
Com_132_neg	ARCAR	5-°±»ùßäßò-4-¼×õ£°·-1-¦Â-D-ß»à«ºËÌÇÜÕ5-Ò»Á×ËáÑÎ	1.06	C9H15N4O8P	338.211	Nucleotide And Its Derivates	ºËÜÕËá¼°ÆäÑÜÉúÎï	"3031-94-5"	945770	993400	855000	1057000	631300	1213000	0.963075173198221	-0.0542796823144	0.991124639995771	0.666666666666667	0.168329891627545
Com_133_neg	APS	5'-ÏÙÜÕËáÁòËá(APS)	1.05	C10H14N5O10PS	427.284	Nucleotide And Its Derivates	ºËÜÕËá¼°ÆäÑÜÉúÎï	"485-84-7"	16340000	4135000	6475000	33390000	12660000	11490000	0.468369829683698	-1.0942799481	0.205832203434958	0.777777777777778	0.599616917598452
Com_134_neg	5-Phosphoribosyl 1-pyrophosphate	5-Á×ËáºËÌÇ»ù-1-½¹Á×Ëá	1.01	C5H13O14P3	196.25	Carbohydrates And Its Derivatives	ÌÇÀà¼°ÆäÑÜÉúÎï	"97-55-2"	275800	22550	215200	48940	39460	127700	2.37644608977325	1.24880567414	0.568202934736658	0.666666666666667	0.763729369432125
Com_135_neg	2-Phenylbutyric acid	2-±½»ù¶¡Ëá	1.83	C10H12O2	164.2	Benzene and substituted derivatives	±½¼°ÆäÈ¡´úÑÜÉúÎï	"90-27-7"	218600	361500	220100	363600	137900	119900	1.28773736723527	0.364838387224	0.430009523554153	0.666666666666667	1.03193613698931
Com_136_neg	Galactaric acid	Õ³Ëá	0.9	C6H10O8	210.14	Sugar Acids And Its Derivatives	ÌÇËá¼°ÆäÑÜÉúÎï	"526-99-8"	78020	46380	37090	57650	66190	66750	0.847316228553439	-0.239027593781	0.435925814089506	0.666666666666667	0.936895120424333
Com_137_neg	6-keto PGE1	6-ÍªPGE1	0.9	C20H32O6	368.5	Eicosanoid	Ñõ»¯Ö¬ÖÊ	"67786-53-2"	38360	14160	66720	12290	13300	18300	2.71679197994987	1.44190410513	0.202592466742296	0.888888888888889	1.36158506888476
Com_138_neg	Pimelic acid	¸ý¶þËá	5.77	C7H12O4	160.17	Fatty Acyls	Ö¬·¾õ£Àà	"111-16-0"	412300	303600	267900	372200	235200	272900	1.11757355447007	0.160369787272	0.576733943816746	0.666666666666667	0.720116305144864
Com_139_neg	Palmitaldehyde	×ØéµÈ©	10.19	C16H32O	240.42	Fatty Acyls	Ö¬·¾õ£Àà	"629-80-1"	900800	997000	1024000	850000	843500	926700	1.11510571712083	0.157180490716	0.0973646633915895	0.888888888888889	1.34378915915042
Com_13_neg	Deoxyguanosine	ÍÑÑõÄñÜÕ	3.181	C10H13N5O4	267.241	Nucleotide And Its Derivates	ºËÜÕËá¼°ÆäÑÜÉúÎï	"961-07-9"	62540	79800	37990	64930	58830	64290	0.958947088540282	-0.0604768804849	0.732311922645211	0.555555555555556	0.36692714339583
Com_140_neg	Ribulose-5-phosphate	ºËÍªÌÇ-5-Á×Ëá	0.93	C5H11O8P	230.02	Carbohydrates And Its Derivatives	ÌÇÀà¼°ÆäÑÜÉúÎï		2057000	5445000	3776000	2206000	1913000	2528000	1.6967052805777	0.762735989056	0.242992823893193	0.777777777777778	0.949037325353094
Com_141_neg	Taurocholic acid	Å£»Çµ¨Ëá	8.09	C26H45NO7S	515.7	Bile Acids	µ¨Ö­Ëá	"81-24-3"	12600	41450	20250	16530	15820	80660	0.657463941244138	-0.605016323243	0.739429335025968	0.444444444444444	0.450548341997175
Com_142_neg	Cytidine 5'-Monophosphate-N-Acetylneuraminic Acid	CMP-ÍÙÒºËáµ¥ÄÆÑÎ	1.11	C20H30N4NaO16P	636.433	Pyrimidines and pyrimidine derivatives	à×à¤¼°ÆäÑÜÉúÎï	"3063-71-6"	35010	91920	47350	22490	10430	26670	2.92465178721262	1.5482648658	0.0586391603530408	1	2.19394951403319
Com_143_neg	Dl-2-Amino-3-phosphonopropionic acid	DL-2-°±»ù-3-Á×±ûËá	18.32	C3H8NO5P	169.073	Amino Acid And Its Derivatives	°±»ùËá¼°ÆäÑÜÉúÎï	"20263-06-3"	50690	54270	52890	53150	51460	52150	1.00695330441439	0.00999678259814	0.783986897897482	0.555555555555556	0.179620569043434
Com_144_neg	D-Mannose	D-¸ÊÂ¶ÌÇ	1.41	C6H12O6	180.156	Carbohydrates And Its Derivatives	ÌÇÀà¼°ÆäÑÜÉúÎï	"3458-28-4"	212200	65730	59550	163200	119600	92900	0.898269896193772	-0.154779109389	0.600834026527539	0.666666666666667	0.666902358694325
Com_145_neg	dTMP	¶þÁ×ËáÍÑÑõÐØÜÕ	2.14	C10H15N2O8P	322.208	Nucleotide And Its Derivates	ºËÜÕËá¼°ÆäÑÜÉúÎï	"365-07-1"	21940	76190	41710	24680	74030	42450	0.990648909039388	-0.0135542452791	0.944565313793726	0.555555555555556	0.237680951156353
Com_146_neg	N-acetyl-L-ornithine	N-ÒÒõ£-L-Äñ°±Ëá	0.896	C7H14N2O3	174.198	Amino Acid And Its Derivatives	°±»ùËá¼°ÆäÑÜÉúÎï	"6205-08-9"	162600	225400	270700	157100	154200	164000	1.38586156111929	0.470783148484	0.175598798722744	0.888888888888889	1.46985529854961
Com_147_neg	Aminomalonic acid	°±»ù±û¶þËá	0.88	C3H5NO4	119.08	Organic Acid And Its Derivatives	ÓÐ»úËá¼°ÆäÑÜÉúÎï	"1068-84-4"	111000	147300	120000	109900	45300	46810	1.8726795703183	0.905104064631	0.124846404799347	1	2.00767267942206
Com_148_neg	TPP	½¹Á×ËáÁò°·ËØ	0.915	C12H19ClN4O7P2S	460.77	Co-Enzyme Factor	¸¨Ã¸Òò×Ó	"154-87-0"	66950	142300	59030	100200	69980	66610	1.13298703492546	0.180131352107	0.852073490007157	0.555555555555556	0.298677382389173
Com_149_neg	Homoarginine	¸ß¾«°±Ëá	0.807	C7H16N4O2	188.23	Amino Acid And Its Derivatives	°±»ùËá¼°ÆäÑÜÉúÎï	"156-86-5"	149800	234200	177700	216800	163200	79200	1.22321428571429	0.290677160903	0.479831428092434	0.666666666666667	0.941668149906229
Com_14_neg	Trehalose	º£ÔåÌÇ	0.962	C12H22O11	342.296	Carbohydrates And Its Derivatives	ÌÇÀà¼°ÆäÑÜÉúÎï	"99-20-7"	159200	69480	86760	118400	101000	69440	1.09209250796289	0.127095067912	0.878964613291542	0.444444444444444	0.194646458351216
Com_150_neg	Creatine phosphate disodium salt	Á×Ëá¼¡Ëá	0.93	C4H8N3Na2O5P	255.08	Organic Acid And Its Derivatives	ÓÐ»úËá¼°ÆäÑÜÉúÎï	"922-32-7"	1208000	81540	120800	443700	93120	115200	2.16303180884022	1.11305488126	0.772779618124714	0.555555555555556	0.311062699688222
Com_151_neg	Tetradecanedioic acid	Ê®ËÄÍé¶þËá	10.673	C14H26O4	258.35	Fatty Acyls	Ö¬·¾õ£Àà	"821-38-5"	72340	74120	67940	71170	68540	71860	1.01337618755022	0.0191698337295	0.693685378365757	0.666666666666667	0.46800979392761
Com_152_neg	Taurine	Å£»ÇËá	0.865	C2H7NO3S	125.15	Organic Acid And Its Derivatives	ÓÐ»úËá¼°ÆäÑÜÉúÎï	"107-35-7"	23800000	14990000	27930000	32410000	16860000	53520000	0.649090378441483	-0.623508723826	0.41506978051547	0.777777777777778	0.894892558390281
Com_153_neg	N-Acetyl-DL-phenylalanine	N-ÒÒõ£-DL-±½±û°±Ëá	6.85	C11H13NO3	207.226	Amino Acid And Its Derivatives	°±»ùËá¼°ÆäÑÜÉúÎï	"2901-75-9"	64520	98430	76610	122500	62000	82990	0.89558488167782	-0.159097920552	0.732516409766542	0.555555555555556	0.69858094505619
Com_154_neg	Sulfoacetic acid	»Ç»ùÒÒËá	0.95	C2H4O5S	140.115	Organic Acid And Its Derivatives	ÓÐ»úËá¼°ÆäÑÜÉúÎï	"123-43-3"	103400	85930	70240	63420	75260	69630	1.24607556046277	0.317391554236	0.191979886987139	0.888888888888889	1.15546866113173
Com_155_neg	Thymidine 5'-diphosphate	ÐØÜÕ-5¡¯-¶þÁ×Ëá	0.69	C10H16N2O11P2	402.188	Nucleotide And Its Derivates	ºËÜÕËá¼°ÆäÑÜÉúÎï		36720	53330	49480	38470	50580	37640	1.10134975136159	0.139272692723	0.564759221140696	0.555555555555556	0.627755412788544
Com_156_neg	UDP-N-Acetyl-Alpha-D-Mannosamine	¶þÁ×ËáÄòÜÕ-N-ÒÒõ£°±»ùÆÏÌÑÌÇ	0.96	C17H27N3O17P2	607.354	Nucleotide And Its Derivates	ºËÜÕËá¼°ÆäÑÜÉúÎï	"26575-17-7"	15560000	22040000	13190000	18070000	9570000	25590000	0.954161187300395	-0.0676950923087	0.983468099130677	0.555555555555556	0.155130785841686
Com_157_neg	Uric Acid	ÄòËá	1.14	C5H4N4O3	168.11	Organic Acid And Its Derivatives	ÓÐ»úËá¼°ÆäÑÜÉúÎï	"69-93-2"	595300	972200	671400	1160000	441600	1989000	0.623544811452125	-0.681434850892	0.54883340460933	0.666666666666667	0.915718213498647
Com_158_neg	Ribose 1-phosphate	ºËÌÇ1-Á×Ëá	0.9	C5H11O8P	230.11	Carbohydrates And Its Derivatives	ÌÇÀà¼°ÆäÑÜÉúÎï	"14075-00-4"	2895000	10000000	6080000	3862000	3138000	4288000	1.68098866052445	0.749309992593	0.376732942211737	0.666666666666667	0.737105249323412
Com_159_neg	Sedoheptulose 7-phosphate	7-Á×Ëá¾°Ìì¸ýÌÇ	0.87	C7H13BaO10P	425.473	Carbohydrates And Its Derivatives	ÌÇÀà¼°ÆäÑÜÉúÎï	"2646-35-7"	178400	152300	225900	122700	133600	175600	1.28872424172262	0.365943592125	0.184593289872311	0.888888888888889	0.855481165474718
Com_15_neg	L-Asparagine	L-Ìì¶¬ÃÅõ£°·	0.843	C4H8N2O3	132.12	Amino Acid And Its Derivatives	°±»ùËá¼°ÆäÑÜÉúÎï	"70-47-3"	360400	154400	320600	159300	109100	120700	2.14700591107684	1.10232616319	0.0989559176632974	0.888888888888889	1.52274322351839
Com_160_neg	Sedoheptulose 1,7-bisphosphate	1,7-¶þÁ×Ëá»¯¾°Ìì¸ýÍªÌÇ	0.88	C7H16O13P2	370.142	Organic Acid And Its Derivatives	ÓÐ»úËá¼°ÆäÑÜÉúÎï	"815-91-8"	129500	93080	115300	161500	3450000	2458000	0.05566850646676	-4.16699481219	0.139812244923662	1	2.11878035698483
Com_161_neg	dGDP	¶þÁ×ËáÍÑÑõÄñÜÕ	1.08	C10H15N5O10P2	427.201	Nucleotide And Its Derivates	ºËÜÕËá¼°ÆäÑÜÉúÎï	"3493-09-2"	12590000	3574000	5237000	25240000	8503000	8172000	0.510580937611834	-0.969788418729	0.271390105118867	0.777777777777778	0.416668084444136
Com_162_neg	D-Galactonic acid	D-°ëÈéÌÇËá	0.92	C6H12O7	196.155	Organic Acid And Its Derivatives	ÓÐ»úËá¼°ÆäÑÜÉúÎï	"13382-27-9"	40410	61090	59180	38560	54200	45080	1.16569936157864	0.221195759821	0.430176173871421	0.777777777777778	0.56259205067353
Com_163_neg	D-Gluconic acid	D-ÆÏÌÑÌÇËá	0.91	C6H12O7	196.155	Sugar Acids And Its Derivatives	ÌÇËá¼°ÆäÑÜÉúÎï	"526-95-4"	82210	144900	109600	112100	97200	89190	1.1280444906027	0.173823969427	0.621125425155837	0.555555555555556	0.407287129744581
Com_164_neg	D-Glucarate	ÆÏÌÑÌÇ¶þËá	0.82	C6H10O8	210.139	Carbohydrates And Its Derivatives	ÌÇÀà¼°ÆäÑÜÉúÎï	"87-73-0"	19380	27190	22680	17510	18660	21520	1.20038134858728	0.263492807763	0.21323597720624	0.888888888888889	1.14055594307866
Com_165_neg	UDP	ÄòÜÕ¶þÁ×Ëá	0.7	C9H14N2O12P2	404.16	Nucleotide And Its Derivates	ºËÜÕËá¼°ÆäÑÜÉúÎï	"58-98-0"	1216000	1262000	1033000	1140000	1639000	1031000	0.921522309711286	-0.1179090015	0.703382611572384	0.555555555555556	0.33632920037791
Com_166_neg	D-Erythrose 4-phosphate	D-³àÞºÌÇ-4-Á×Ëá	0.95	C4H9O7P	200.084	Carbohydrates And Its Derivatives	ÌÇÀà¼°ÆäÑÜÉúÎï	"585-18-2"	19620000	31800000	11720000	13940000	299400000	222000000	0.117943736690701	-3.08382928746	0.235383177043983	0.777777777777778	1.33092338870973
Com_167_neg	D-Fructose 1,6-bisphosphate	D-¹ûÌÇ-1,6-¶þÁ×Ëá	0.86	C6H14O12P2	340.116	Sugar Acids And Its Derivatives	ÌÇËá¼°ÆäÑÜÉúÎï	"488-69-7"	7981000	1428000	693300	2547000	1425000	1076000	2.00124801901743	1.00089997466	0.783458151904941	0.555555555555556	0.294792055566199
Com_168_neg	dATP	ÍÑÑõÈýÁ×ËáÏÙÜÕ	0.73	C10H16N5O12P3	491.001	Nucleotide And Its Derivates	ºËÜÕËá¼°ÆäÑÜÉúÎï	"1927-31-7"	12120	21190	16700	13780	19770	15200	1.02584615384615	0.0368143861832	0.955291242537093	0.555555555555556	0.0865635142920754
Com_169_neg	1,3 bisphosphoglycerate	1,3-¸ÊÓÍ¶þõ¥	12.04	C3H8O10P2	266.04	Glycerolipids	¸ÊÓÍÖ¬Àà		83680	66840	79630	81540	75230	116900	0.840976358387839	-0.249862851025	0.373314216070638	0.666666666666667	0.785580664991935
Com_16_neg	15-Hete	15-ôÇ¶þÊ®ÍéËÄÏ©Ëá	13.08	C20H32O3	320.5	Eicosanoid	Ñõ»¯Ö¬ÖÊ	"54845-95-3"	3389	7704	5750	4240	3570	8499	1.03274265742841	0.0464808029882	0.892659710152466	0.444444444444444	0.166335891512405
Com_170_neg	Octanedioic acid	ÐÁ¶þËá	6.649	C8H14O4	174.19	Organic Acid And Its Derivatives	ÓÐ»úËá¼°ÆäÑÜÉúÎï	"505-48-6"	90900	99560	95740	89660	92520	89050	1.05519300962283	0.0775069122572	0.170389048690765	0.888888888888889	0.80933749447621
Com_171_neg	N-Acetyl-D-glucosamine	N-ÒÒõ£-D-°±»ùÆÏÌÑÌÇ	0.984	C8H15NO6	221.208	Carbohydrates And Its Derivatives	ÌÇÀà¼°ÆäÑÜÉúÎï	"7512-17-6"	4741	4915	4908	4388	3415	5717	1.07721893491124	0.107311494275	0.584137158422982	0.666666666666667	0.852178000447707
Com_172_neg	2-Hydroxybutyric acid	2-ôÇ»ù¶¡Ëá	2.741	C4H8O3	104.1	Organic Acid And Its Derivatives	ÓÐ»úËá¼°ÆäÑÜÉúÎï	"600-15-7"	639200	982800	298700	732700	554000	625600	1.0043926162213	0.006323327808	0.802054276051094	0.555555555555556	0.452960264495429
Com_173_neg	N-Acetyl-L-methionine	N-ÒÒõ£-L-µ°°±Ëá	5.315	C7H13NO3S	191.25	Amino Acid And Its Derivatives	°±»ùËá¼°ÆäÑÜÉúÎï	"65-82-7"	16720	19390	15430	15090	12810	14310	1.22103766879886	0.288107707902	0.0812702215731564	1	0.96663696291336
Com_174_neg	(R)-3-Hydroxyisobutyric acid	(R)-3-ôÇ»ùÒì¶¡Ëá	2.37	C4H8O3	104.104	Organic Acid And Its Derivatives	ÓÐ»úËá¼°ÆäÑÜÉúÎï	"1910-47-0"	805600	871500	322700	399100	365100	546300	1.52598244944678	0.609738369616	0.393426772752449	0.666666666666667	1.16776713310085
Com_175_neg	2-Hydroxybutanoic acid	(S)-2-ôÇ»ù¶¡Ëá	2.64	C4H8O3	104.104	Organic Acid And Its Derivatives	ÓÐ»úËá¼°ÆäÑÜÉúÎï	"3347-90-8"	513800	693500	242300	508500	413400	511100	1.0115840893231	0.0166162508967	0.83948697048572	0.666666666666667	0.3302570681838
Com_176_neg	N-Acetyl-L-tyrosine	N-ÒÒõ£-L-ÀÒ°±Ëá	5.17	C11H13NO4	223.23	Amino Acid And Its Derivatives	°±»ùËá¼°ÆäÑÜÉúÎï	"537-55-3"	19810	15730	8128	32460	10870	15460	0.742779384249022	-0.428994320883	0.575331632442087	0.444444444444444	0.89159831072406
Com_177_neg	Itaconic acid	ÒÂ¿µËá	1.45	C5H6O4	130.1	Fatty Acyls	Ö¬·¾õ£Àà	"97-65-4"	96060	112300	44190	104500	94920	102200	0.83731184934686	-0.256163053098	0.475481394721258	0.555555555555556	1.14415846336873
Com_178_neg	Pyridoxal 5-phosphate monohydrate	5-Á×ËáßÁ¶ßÈ©	1.7	C8H12NO7P	265.16	Vitamins	Î¬ÉúËØ	"41468-25-1"	2732000	3425000	2244000	2583000	2694000	2551000	1.07319877363311	0.101917311114	0.692889650241613	0.666666666666667	0.405108129048342
Com_179_neg	DL-Serine	DL-Ë¿°±Ëá	0.83	C3H7NO3	105.09	Amino Acid And Its Derivatives	°±»ùËá¼°ÆäÑÜÉúÎï	"302-84-1"	1273000	676900	1212000	484400	347500	918000	1.80690325161438	0.85351926096	0.150442343059433	0.888888888888889	1.68441394206256
Com_17_neg	Shikimic Acid	Ã§²ÝËá	5.24	C7H10O5	174.15	Alcohols and polyols	´¼ºÍ¶àÔª´¼	"138-59-0"	31130	16460	212500	60320	138300	38410	1.09728726321563	0.133941264086	0.703259810700846	0.666666666666667	0.510261776202532
Com_180_neg	Irbesartan	¶ò±´É³Ì¹	1.04	C25H28N6O	428.529	Benzene and substituted derivatives	±½¼°ÆäÑÜÉúÎï	"138402-11-6"	34440	45260	16450	77890	34820	41390	0.623945489941596	-0.680508099175	0.277138650255966	0.777777777777778	1.35386695798044
Com_181_neg	Hydroquinone	¶Ô±½¶þ·Ó	4.79	C6H6O2	110.111	Phenols And Its Derivatives	·ÓÀà¼°ÆäÑÜÉúÎï	"123-31-9"	8594	3162	19590	7440	16600	4974	1.08037499138347	0.111532149713	0.944192559314861	0.555555555555556	0.17288934269364
Com_182_neg	Calcium D-Panthotenate	D-·ºËá¸Æ	4.59	C18H32CaN2O10	476.53	Vitamins	Î¬ÉúËØ	"137-08-6"	28290000	19410000	30130000	34650000	31370000	22190000	0.882326266863167	-0.180615860254	0.549701923929922	0.777777777777778	0.812542040738251
Com_183_neg	L-Arabinose	°¢À­²®ÌÇ	0.9	C5H10O5	150.13	Carbohydrates And Its Derivatives	ÌÇÀà¼°ÆäÑÜÉúÎï	"5328-37-0"	13100	15050	16360	15020	9976	17830	1.0393219072526	0.0556425667238	0.759038879514847	0.555555555555556	0.396094847796215
Com_184_neg	D-3-Phenyllactic acid	D-3-±½ÈéËá	6.77	C9H10O3	166.17	Organic Acid And Its Derivatives	ÓÐ»úËá¼°ÆäÑÜÉúÎï	"7326-19-4"	211500	220300	414500	259500	264800	118200	1.31719844357977	0.397472712338	0.449548797767947	0.444444444444444	1.07773551879681
Com_185_neg	L-Glutamic acid monosodium salt	¹È°±ËáÄÆ	0.86	C5H8NNaO4	169.11	Amino Acid And Its Derivatives	°±»ùËá¼°ÆäÑÜÉúÎï	"142-47-2"	1896000	1415000	1376000	1917000	847000	1623000	1.06838386140871	0.0954300884598	0.708050867351556	0.555555555555556	0.507231135275342
Com_186_neg	L(+)-Asparagine monohydrate	L-Ìì¶¬õ£°·Ò»Ë®Îï	0.83	C4H8N2O3.H2O	150.13	Amino Acid And Its Derivatives	°±»ùËá¼°ÆäÑÜÉúÎï	"5794-13-8"	730400	250800	746300	324500	215800	361800	1.91497616672209	0.937326436868	0.256183247186486	0.777777777777778	1.17668853749486
Com_187_neg	Cytidine-5'-monophosphate	°ûÜÕ-5-µ¥Á×Ëá	0.97	C9H14N3O8P	323.197	Nucleotide And Its Derivates	ºËÜÕËá¼°ÆäÑÜÉúÎï	"63-37-6"	24750	250600	144800	61070	128800	150200	1.23548093039668	0.305072742893	0.911938655787211	0.555555555555556	0.160428370715164
Com_188_neg	L-Pyroglutamic acid	½¹¹È°±Ëá	1.689	C5H7NO3	129.11	Organic Acid And Its Derivatives	ÓÐ»úËá¼°ÆäÑÜÉúÎï	"98-79-3"	69130	83970	67140	64910	132500	78370	0.798607585756762	-0.324441319083	0.488516234990484	0.555555555555556	0.663855315495227
Com_189_neg	Citric acid	ÄûÃÊËá	1.516	C6H8O7	192.12	Tca Cycle	ÈýôÈËáÑ­»·	"77-92-9"	4956000	7737000	1479000	11810000	5125000	8521000	0.556725329981144	-0.844962370213	0.276324482623229	0.888888888888889	1.58224904323699
Com_18_neg	Beta-Alanine	¦Â-°±»ù±ûËá	4.54	C3H7NO2	89.09	Amino Acid And Its Derivatives	°±»ùËá¼°ÆäÑÜÉúÎï	"107-95-9"	4906	2427	4543	5189	5158	2921	0.895085921012963	-0.159901918801	0.697454503859361	0.777777777777778	0.515891405120272
Com_190_neg	DL-Norepinephrine	DL-È¥¼×ÉöÉÏÏÙËØ	0.917	C8H12ClNO3	205.639	Hormones	¼¤ËØ	"55-27-6"	35690	48320	66440	80060	27170	138100	0.613255614886072	-0.705439556922	0.580748871234853	0.666666666666667	0.824698435717225
Com_191_neg	Lactobionic acid	ÈéÌÇËá	0.91	C12H22O12	358.3	Carbohydrates And Its Derivatives	ÌÇÀà¼°ÆäÑÜÉúÎï	"96-82-2"	49380	19670	17710	31620	9715	29910	1.21776966804688	0.284241284155	0.700072864835913	0.444444444444444	0.451107331686933
Com_192_neg	Fumaric acid	ÑÓºúË÷Ëá	1.82	C4H4O4	116.07	Tca Cycle	ÈýôÈËáÑ­»·	"110-17-8"	545800	763400	544900	483000	472100	382700	1.3859321273733	0.470856606754	0.0866601562995577	1	1.35188528895533
Com_193_neg	L-Arabinitol	L-(-)-°¢À­²®´¼	0.925	C5H12O5	152.15	Sugar Alcohols	ÌÇ´¼	"7643-75-6"	6588	7618	6671	5475	9429	6682	0.967154637264894	-0.0481815158584	0.956769558286585	0.555555555555556	0.326287356787334
Com_194_neg	Taurohyocholic acid sodium salt	Å£»ÇÖíµ¨ËáÄÆÑÎ	9.03	C26H44NNaO7S	537.69	Bile Acids	µ¨Ö­Ëá		236700	1417000	215000	342200	370800	2122000	0.659153439153439	-0.601313756909	0.634457110314084	0.777777777777778	0.576772194039766
Com_195_neg	L-(-)-Glyceric acid	L-¸ÊÓÍËá	1.0	C3H6O4	106.077	Sugar Acids And Its Derivatives	ÌÇËá¼°ÆäÑÜÉúÎï	"28305-26-2"	83670	137900	99290	143100	179900	172300	0.64780940843933	-0.626358673667	0.0727296566749743	1	1.53446148494834
Com_196_neg	Lactic acid	ÈéËá	1.44	C3H6O3	90.078	Organic Acid And Its Derivatives	ÓÐ»úËá¼°ÆäÑÜÉúÎï	"50-21-5"	56010000	63200000	61750000	46100000	61410000	53570000	1.12341693568413	0.167893457044	0.278650129288424	0.888888888888889	1.42524595363279
Com_197_neg	L-Cysteinesulfinic acid	L-°ëë×ÑÇ»ÇËá	0.88	C3H7NO4S	153.16	Organic Acid And Its Derivatives	ÓÐ»úËá¼°ÆäÑÜÉúÎï	"1115-65-7"	6573	9221	4047	25110	3653	7110	0.553090067738968	-0.854413660178	0.635979891666569	0.555555555555556	0.602584584316283
Com_198_neg	L-Homocystine	L-¸ßë×°±Ëá	0.83	C8H16N2O4S2	268.354	Amino Acid And Its Derivatives	°±»ùËá¼°ÆäÑÜÉúÎï	"626-72-2"	7133	15150	12150	7812	15120	27560	0.681949615780718	-0.552262941779	0.525211008203922	0.666666666666667	0.992377314486913
Com_199_neg	Linolelaidic Acid (C18:2N6T)	·´ÑÇÓÍËá	15.16	C18H32O2	280.445	Fatty Acyls	Ö¬·¾õ£Àà	"506-21-8"	32020	81590	37620	21520	32550	36670	1.66662993167291	0.73693379538	0.26546552856394	0.777777777777778	1.08507709855932
Com_19_neg	Erythronolactone	(3R,4R)-D-³àÍªËáÄÚõ¥	4.03	C4H6O4	118.09	Organoheterocyclic compounds	ÓÐ»úÔÓ»·»¯ºÏÎï	"15667-21-7"	89780	104700	84240	85660	74090	79100	1.16692484823111	0.22271165224	0.131255365122606	0.888888888888889	1.84957491916401
Com_1_neg	Tauro-alpha-Muricholic acid sodium salt	Å£»Ç-°¢¶û·¨-Êóµ¨ËáÄÆÑÎ	9.01	C26H44NO7S.Na	537.69	Bile Acids	µ¨Ö­Ëá	"25696-60-0"	218200	1321000	194900	344100	365700	1972000	0.646617943172496	-0.629014553141	0.588925001434023	0.777777777777778	0.650221241630387
Com_200_neg	Lysopa 16:0	ÈÜÑªÂÑÁ×Ö¬Ëá16:0	12.54	C19H39O7P	410.48	Phospholipid	Á×Ö¬		6070	15600	5158	9973	5952	9591	1.05141871766735	0.0723373235354	0.902620764964776	0.555555555555556	0.350814903885226
Com_201_neg	Lysope 14:0	ÈÜÑªÂÑÁ×Ö¬õ£ÒÒ´¼°·14:0	11.27	C19H40NO7P	425.5	Phospholipid	Á×Ö¬		1859	2058	4862	4294	4966	2680	0.735259631490787	-0.443674317151	0.365381560979276	0.777777777777778	1.26692152886337
Com_202_neg	Lysope 16:0	ÈÜÑªÂÑÁ×Ö¬õ£ÒÒ´¼°·16:0	12.48	C21H44NO7P	453.55	Phospholipid	Á×Ö¬		663100	1098000	671100	753700	321500	878100	1.24517483233502	0.316348322241	0.490049926132863	0.444444444444444	1.03065972777381
Com_203_neg	LysoPE 18:0	ÈÜÑªÁ×Ö¬õ£ÒÒ´¼°· 18:0	13.73	C23H48NO7P	481.6	Phospholipid	Á×Ö¬	"69747-55-3"	1252000	1158000	1206000	1243000	453000	1389000	1.17212317666126	0.229124188378	0.530504258041316	0.555555555555556	0.749639583065437
Com_204_neg	PE(18:1(9Z)/0:0)	PE(18:1(9Z)/0:0)	12.85	C23H46NO7P	479.6	Glycerolipids	¸ÊÓÍÖ¬Àà	"89576-29-4"	554200	634200	412700	471200	220000	579700	1.25981587851129	0.333212899941	0.433593986084024	0.666666666666667	1.14028641818579
Com_205_neg	4-Hydroxyphenyllactate	¶ÔôÇ»ù±½ÈéËá	5.02	C9H10O4	182.173	Organic Acid And Its Derivatives	ÓÐ»úËá¼°ÆäÑÜÉúÎï	"6482-98-0"	197300	199600	120100	243200	176200	93270	1.00844597889481	0.0121338027729	0.874071738934196	0.555555555555556	0.361357782249205
Com_206_neg	D-Glucosamine 6-phosphate	D-°±»ùÆÏÌÑÌÇ-6-Á×Ëá	0.86	C6H14NO8P	259.151	Sugar Acids And Its Derivatives	ÌÇËá¼°ÆäÑÜÉúÎï	"3616-42-0"	280700	286200	707600	589300	304600	551600	0.881701833275683	-0.181637235455	0.646728710023567	0.666666666666667	0.63496224131866
Com_207_neg	2-Hydroxy-2-methylbutanedioic acid	2-ôÇ»ù-2-¼×»ù¶¡¶þËá	1.5	C5H8O5	148.114	Fatty Acyls	Ö¬·¾õ£Àà	"597-44-4"	101300	46510	31820	62880	59790	59570	0.985678226514486	-0.0208113375091	0.732692478850406	0.666666666666667	0.542639176540418
Com_208_neg	3-(2-Naphthyl)-D-Alanine	3-(2-ÝÁ»ù)-D-±û°±Ëá	6.22	C13H13NO2	215.248	Amino Acid And Its Derivatives	°±»ùËá¼°ÆäÑÜÉúÎï	"76985-09-6"	55070	57620	46280	29300	21110	56400	1.48834378803483	0.573707808708	0.235507323760095	0.777777777777778	1.69464440481349
Com_209_neg	dADP	2'-ÍÑÑõÏÙÜÕ-5'-¶þÁ×Ëá	0.75	C10H15N5O9P2	411.202	Nucleotide And Its Derivates	ºËÜÕËá¼°ÆäÑÜÉúÎï	"2793-06-8"	51130	56290	64200	59800	53710	58400	0.998313070792857	-0.00243577947336	0.950109936598544	0.555555555555556	0.192868510183898
Com_20_neg	3-Hydroxypropanoic acid	3-ôÇ»ù±ûËá	1.15	C3H6O3	90.08	Organic Acid And Its Derivatives	ÓÐ»úËá¼°ÆäÑÜÉúÎï	"503-66-2"	24030	24814	36940	17370	22640	19880	1.43235932542996	0.51839345628	0.113395350911122	1	2.08380966746729
Com_210_neg	2-deoxyglucose-6-phosphate	6-Á×Ëá-2-ÍÑÑõÆÏÌÑÌÇ	0.98	C6H13O8P	244.136	Nucleotide And Its Derivates	ºËÜÕËá¼°ÆäÑÜÉúÎï	"3573-50-0"	422700	312000	730900	400800	254900	475300	1.29584438549956	0.37389247922	0.506001043501032	0.666666666666667	0.573584024193844
Com_211_neg	dGTP	2'-ÍÑÑõÄñÜÕ5'-ÈýÁ×Ëá	1.1	C10H16N5O13P3	507.181	Nucleotide And Its Derivates	ºËÜÕËá¼°ÆäÑÜÉúÎï	"2564-35-4"	45890000	69370	121900	21650000	405000	346800	2.05703425617584	1.04056581953	0.797741801141583	0.666666666666667	0.366048041859881
Com_212_neg	3-Methylsalicylate	3-¼×·Ó»ÇËá	0.71	C8H8O3	152.147	Benzene and substituted derivatives	±½¼°ÆäÑÜÉúÎï	"83-40-9"	115100	225000	300300	214600	242300	357600	0.786249232658072	-0.346941390897	0.433179208136502	0.666666666666667	1.1182553537728
Com_213_neg	Traumatic acid	·´Ê½-2-Ê®¶þÌ¼Ï©¶þËá	9.19	C12H20O4	228.28	Fatty Acyls	Ö¬·¾õ£Àà	"6402-36-4"	394200	382300	383900	376300	382900	350300	1.04587652095539	0.0647125331136	0.231149946678663	0.888888888888889	1.47982257667285
Com_214_neg	2-Hydroxy-2-methylbutanoic acid	2-ôÇ»ù-2-¼×»ù¶¡Ëá	4.61	C5H10O3	118.13	Fatty Acyls	Ö¬·¾õ£Àà	"3739-30-8"	38330	78420	120900	39350	60030	66840	1.42973168090483	0.515744420465	0.511205597312975	0.666666666666667	0.784232108051512
Com_215_neg	Pyridoxal 5'-phosphate hydrate	3-ôÇ»ù-2-¼×»ù-5-Á×õ£Ñõ¼×»ù-4-ßÁà¤¼×È©	1.63	C8H10NO6P	247.14	Pyridine And Its Derivatives	ßÁà¤¼°ÆäÑÜÉúÎï	"853645-22-4"	140300	200500	136900	168300	167400	159100	0.965440582053355	-0.0507406235051	0.722546190335288	0.666666666666667	0.415158066958352
Com_216_neg	Quinic acid	¿üÄáËá	0.998	C7H12O6	192.17	Organic Acid And Its Derivatives	ÓÐ»úËá¼°ÆäÑÜÉúÎï	"77-95-2"	288100	120500	159800	268400	231800	234117	0.774052623049718	-0.369496445272	0.336214474820165	0.666666666666667	1.21243344234223
Com_217_neg	Inositol	¼¡´¼	0.85	C6H12O6	180.16	Phenols And Its Derivatives	·ÓÀà¼°ÆäÑÜÉúÎï	"87-89-8"	220500	106100	163800	130400	108700	220600	1.06678268435936	0.093266312874	0.832426358141082	0.444444444444444	0.286948399284545
Com_218_neg	2,4-Dihydroxybenzoic Acid	2,4-¶þôÇ»ù±½¼×Ëá	1.7	C7H6O4	154.12	Benzoic Acid And Its Derivatives	±½¼×Ëá¼°ÆäÑÜÉúÎï	"89-86-1"	5029	6490	4505	4613	4781	6023	1.03937212168386	0.0557122682864	0.817287237183143	0.555555555555556	0.291784042024929
Com_219_neg	Linoleic acid	ÑÇÓÍËá(C18:2)	15.19	C18H32O2	280.4	Fatty Acyls	Ö¬·¾õ£Àà	"60-33-3"	40280	45110	27100	27680	33030	42230	1.09277248882844	0.127993068526	0.702997604912667	0.555555555555556	0.258832399705883
Com_21_neg	Hydroxyphenyllactic acid	ôÇ±½»ùÈéËá	5.07	C9H10O4	182.17	Organic Acid And Its Derivatives	ÓÐ»úËá¼°ÆäÑÜÉúÎï	"306-23-0"	224500	229400	142700	274700	204200	106200	1.01965475987011	0.0280807595159	0.840694051394212	0.555555555555556	0.38593581180291
Com_220_neg	gamma-Linolenic acid	¦Ã-ÑÇÂéËá(C18:3)	12.03	C18H30O2	278.4	Fatty Acyls	Ö¬·¾õ£Àà	"506-26-3"	198400	178100	178100	225500	210400	209000	0.859978291207939	-0.217627853168	0.0309828004694701	1	1.71848678404594
Com_221_neg	Trans,Trans-Muconic Acid	·´,·´-Õ³¿µËá	0.96	C6H6O4	142.11	Fatty Acyls	Ö¬·¾õ£Àà	"3588-17-8"	9100	5025	8032	6091	5313	7646	1.16309711286089	0.217971559746	0.571568142399551	0.666666666666667	0.685864304663663
Com_222_neg	5-Hydroxyhexanoic Acid	5-ôÇ»ù¼ºËá	6.36	C6H12O3	132.16	Fatty Acyls	Ö¬·¾õ£Àà	"185956-02-9"	98100	84620	105200	71490	52720	54160	1.61417278690363	0.690795018186	0.0190715969525421	1	2.45289318729734
Com_223_neg	Cis-4,7,10,13,16,19-Docosahexaenoic Acid(C22:6N3)	Ë³Ê½-4,7,10,13,16,19-¶þÊ®¶þÌ¼ÁùÏ©Ëá	14.89	C22H32O2	328.5	Fatty Acyls	Ö¬·¾õ£Àà	"6217-54-5"	54700	36410	44260	31450	31020	38430	1.3416253716551	0.42398187727	0.121156018932481	0.888888888888889	1.86936585138967
Com_224_neg	Adenosine5-phosphosulfate	ÏÙÜÕ5-Á×õ£ÁòËá¶þÄÆÑÎ	1.04	C10H13N5NaO10PS	449.266	Nucleotide And Its Derivates	ºËÜÕËá¼°ÆäÑÜÉúÎï	"102029-95-8"	42290	16490	31510	68460	29500	41120	0.64919470808168	-0.623276855099	0.298752914253891	0.666666666666667	1.06464454173709
Com_225_neg	Adenosine5'-diphosphoglucose	5'-¶þÁ×ËáÆÏÌÑÌÇÏÙÜÕ¶þÄÆÑÎ	1.02	C16H23N5Na2O15P2	633.305	Nucleotide And Its Derivates	ºËÜÕËá¼°ÆäÑÜÉúÎï	"102129-65-7"	20290	33230	38380	20710	56950	12180	1.02292965271594	0.0327069337758	0.719368926965588	0.555555555555556	0.491309204921834
Com_226_neg	Adenosine 5'-Diphosphate	¶þÁ×ËáÏÙÜÕ	1.04	C10H15N5O10P2	427.201	Nucleotide And Its Derivates	ºËÜÕËá¼°ÆäÑÜÉúÎï	"58-64-0"	17790000	4577000	7111000	32540000	11730000	10860000	0.534699800471612	-0.903198956506	0.287317326368655	0.777777777777778	0.458140428637454
Com_227_neg	8,15-Dihete	8,15-¶þôÇ»ù¶þÊ®Ì¼ËÄÏ©Ëá	7.14	C20H32O4	336.466	Eicosanoid	Ñõ»¯Ö¬ÖÊ	"80234-65-7"	5927	4436	4565	3292	2903	3935	1.47364264560711	0.559386717163	0.0388210658530257	1	2.16926679602235
Com_228_neg	5-Methyl-dl-tryptophan	5-¼×»ù-DL-É«°±Ëá	4.26	C12H14N2O2	218.252	Amino Acid And Its Derivatives	°±»ùËá¼°ÆäÑÜÉúÎï	"951-55-3"	62030	118300	55060	50620	53350	59910	1.43635587014889	0.522413234184	0.326919563286818	0.888888888888889	0.598364227733609
Com_229_neg	5-Hydroxyindole-2-carboxylic acid	5-ôÇ»ùßÅßá-2-¼×Ëá	0.71	C9H7NO3	177.157	Indole And Its Derivatives	ßÅßá¼°ÆäÑÜÉúÎï	"21598-06-1"	333000	303300	262200	313600	279900	328000	0.975040694519805	-0.0364656621208	0.759034792636971	0.555555555555556	0.393449055850729
Com_22_neg	4-Hydroxyphenylethanol	¶ÔôÇ»ù±½ÒÒ´¼	7.61	C8H10O2	138.16	Phenols And Its Derivatives	·ÓÀà¼°ÆäÑÜÉúÎï	"501-94-0"	482600	479900	445200	525000	493200	502500	0.925692115473137	-0.111395660948	0.0788870237353456	1	1.54322373337357
Com_230_neg	Guanidinoacetic acid	ëÒ»ùÒÒËá	1.13	C3H7N3O2	117.107	Organic Acid And Its Derivatives	ÓÐ»úËá¼°ÆäÑÜÉúÎï	"352-97-6"	19550	24850	21830	37590	16270	34050	0.753384142873393	-0.408542426931	0.487634142557336	0.666666666666667	0.737622993062476
Com_231_neg	D-Fructose 6-phosphate	D-¹ûÌÇ-6-Á×Ëá	0.87	C6H13O9P	260.03	Carbohydrates And Its Derivatives	ÌÇÀà¼°ÆäÑÜÉúÎï	"643-13-0"	219500000	289100000	146200000	173100000	184600000	51430000	1.60046928849021	0.67849499318	0.302769998161353	0.777777777777778	1.13775378809966
Com_232_neg	5-oxoproline	5-Ñõ»¯¸¬°±Ëá	1.63	C5H7NO3	129.043	Amino Acid And Its Derivatives	°±»ùËá¼°ÆäÑÜÉúÎï	"149-87-1"	47270	61440	56250	48870	98540	55500	0.812971268049874	-0.298723729271	0.534754473120603	0.444444444444444	0.576363897322621
Com_233_neg	Deoxycytidine	ÍÑÑõ°ûÜÕ	1.81	C9H13N3O4	227.091	Nucleotide And Its Derivates	ºËÜÕËá¼°ÆäÑÜÉúÎï	"951-77-9"	29740	37680	23410	50310	20110	28740	0.915994352561517	-0.126589391278	0.916239841516	0.555555555555556	0.511521352879414
Com_234_neg	UDP-D-glucose	ÄòÜÕ 5'-¶þÁ×ËáÆÏÌÑÌÇ	0.95	C15H24N2O17P2	566.1	Carbohydrates And Its Derivatives	ÌÇÀà¼°ÆäÑÜÉúÎï	"133-89-1"	3653000	2970000	2036000	2181000	3461000	3643000	0.932579429186861	-0.100701487789	0.772899030045721	0.555555555555556	0.493298861784683
Com_235_neg	12,13-EODE	12,13-»·ÑõÊ®°ËÌ¼¶þÏ©Ëá	12.67	C18H32O3	296.0	Eicosanoid	Ñõ»¯Ö¬ÖÊ		40680	66530	15500	35160	26390	63470	0.981522956326988	-0.0269060843617	0.834364712679865	0.555555555555556	0.229182719744612
Com_236_neg	Sodium cholate	µ¨ËáÄÆ	10.34	C24H39NaO5	430.55	Bile Acids	µ¨Ö­Ëá	"361-09-1"	3095	3263	4633	3400	4025	2490	1.10852244074634	0.148637976182	0.606602936742758	0.444444444444444	0.378067303200689
Com_237_neg	Tropolone	»·¸ýÈýÏ©·ÓÍª	7.39	C7H6O2	122.12	Ketones	ÍªÀà	"533-75-5"	121200	145100	134000	130300	130300	125800	1.03597308488613	0.0509865215518	0.596601432728746	0.666666666666667	0.227786573063245
Com_238_neg	Bisphenol A	Ë«·ÓA	9.58	C15H16O2	228.29	Phenols And Its Derivatives	·ÓÀà¼°ÆäÑÜÉúÎï	"80-05-7"	14520	19390	13090	17880	15240	14900	0.978758850478967	-0.0309746467781	0.821532562024128	0.666666666666667	0.527469421458642
Com_239_neg	Cyclohexaneacetic acid	»·¼º»ùÒÒËá	1.03	C8H14O2	142.2	Fatty Acyls	Ö¬·¾õ£Àà	"5292-21-7"	967400	384600	759900	395600	686100	331100	1.49483295583239	0.579984275556	0.342477095599283	0.777777777777778	1.23277622937544
Com_23_neg	Isocytosine	Òì°ûà×à¤	0.91	C4H5N3O	111.1	Nucleotide And Its Derivates	ºËÜÕËá¼°ÆäÑÜÉúÎï	"108-53-2"	6315	5555	5429	3928	6443	4453	1.16695898542903	0.222753856197	0.361398177452996	0.666666666666667	1.13090186353179
Com_240_neg	4-Nitrophenol	4-Ïõ»ù±½·Ó	7.71	C6H5NO3	139.11	Phenols And Its Derivatives	·ÓÀà¼°ÆäÑÜÉúÎï	"100-02-7"	1380000	1280000	1328000	1297000	1379000	1383000	0.982508006898251	-0.0254589302995	0.589240419183848	0.666666666666667	0.509559127180898
Com_242_neg	CDP	5-°ûÜÕ¶þÁ×Ëá	0.99	C9H15N3O11P2	403.176	Nucleotide And Its Derivates	ºËÜÕËá¼°ÆäÑÜÉúÎï	"63-38-7"	207300	41420	335600	434800	255900	252400	0.619573746156293	-0.690652082284	0.353391689377773	0.777777777777778	0.603247693941088
Com_243_neg	N-Methylhydantoin	¼×õ£ÒÒÄÚëå	1.39	C4H6N2O2	114.1	Organoheterocyclic compounds	ÓÐ»úÔÓ»·»¯ºÏÎï	"616-04-6"	3332000	3708000	3072000	3423000	3559000	3664000	0.949840315611497	-0.0742431027484	0.43151410006693	0.666666666666667	0.70025211458511
Com_244_neg	UDP-D-glucuronate	ÄòÜÕ-5'-¶þÁ×ËáÆÏÌÇÈ©Ëá	0.94	C15H22N2O18P2	580.285	Nucleotide And Its Derivates	ºËÜÕËá¼°ÆäÑÜÉúÎï	"2616-64-0"	546300	311600	175900	490200	188700	435800	0.927424419126222	-0.10869838145	0.834449932786236	0.555555555555556	0.218586486314067
Com_245_neg	UDP-galactose	ÄòÜÕ-5'-¶þÁ×Ëá°ëÈéÌÇ	0.92	C15H22N2Na2O17P2	610.265	Nucleotide And Its Derivates	ºËÜÕËá¼°ÆäÑÜÉúÎï	"2956-16-3"	5987000	5204000	3760000	3425000	6018000	6420000	0.942507722372817	-0.0854236558341	0.876075681238774	0.666666666666667	0.461156903945547
Com_246_neg	geranyl pp	½¹Á×ËáÏãÒ¶õ¥	0.83	C10H20O7P2	314.209	Prenol lipids	Ï©´¼õ¥		5435	16400	12890	12450	14140	16560	0.804750869061414	-0.313385865198	0.454654192257036	0.666666666666667	0.869216553207216
Com_247_neg	Glyceraldehyde 3-phosphate diethyl acetal	DL-¸ÊÓÍÈ©Ëõ¶þÒÒ´¼-3-Á×ËáÒ»±µÑÎ	0.96	C7H15BaO7P	379.491	Organic Acid And Its Derivatives	ÓÐ»úËá¼°ÆäÑÜÉúÎï	"93965-35-6"	365700	850100	530700	459500	353000	477200	1.35419089710785	0.437431126578	0.41640231233925	0.777777777777778	1.06448328506218
Com_248_neg	1,2,3-Benzenetricarboxylic acid	1,2,3-±½Èý¼×Ëá	6.42	C9H6O6	210.14	Benzoic Acid And Its Derivatives	±½¼×Ëá¼°ÆäÑÜÉúÎï	"569-51-7"	6731	6080	5728	3708	15600	6713	0.712463010645248	-0.489112980012	0.726319324390552	0.555555555555556	0.703518530732122
Com_249_neg	2-Phosphoglyceric acid	2-Á×Ëá¸ÊÓÍËá	0.92	C3H7O7P	186.057	Carbohydrates And Its Derivatives	ÌÇÀà¼°ÆäÑÜÉúÎï	"2553-59-5"	1746000	647800	376400	754700	281900	384100	1.94988386006898	0.96338819603	0.370909755744866	0.666666666666667	0.659528762288111
Com_24_neg	13,14-dihydro-15-keto-PGD2	13,14-¶þÇâ-15-ÍªPGD2	1.04	C20H32O5	352.465	Eicosanoid	Ñõ»¯Ö¬ÖÊ	"59894-07-4"	29660	25310	12560	13060	25080	55400	0.72193713919179	-0.470054871244	0.685565128400531	0.444444444444444	0.764352523972225
Com_250_neg	Citraconic acid	Äû¿µËá	1.56	C5H6O4	130.099	Fatty Acyls	Ö¬·¾õ£Àà	"498-23-7"	296900	350500	142000	358400	269300	354500	0.80370596619833	-0.315260303302	0.424034742209735	0.777777777777778	1.23976000518231
Com_251_neg	Citramalate	¼×»ùÆ»¹ûËá	1.44	C5H8O5	148.114	Organic Acid And Its Derivatives	ÓÐ»úËá¼°ÆäÑÜÉúÎï	"2306-22-1"	11080	29000	6021	30910	18720	26270	0.607391304347826	-0.719301840422	0.268797590438882	0.777777777777778	1.47517194290737
Com_252_neg	Cyclohexylsulfamate	»·À­Ëá	1.2	C6H13NO3S	179.237	Organic Acid And Its Derivatives	ÓÐ»úËá¼°ÆäÑÜÉúÎï	"100-88-9"	60700	68180	97400	68790	44740	67330	1.25113347340484	0.323235707287	0.328727516614786	0.666666666666667	0.923559619468513
Com_253_neg	Cytidine 3'-phosphate	°ûà¤-3'-µ¥Á×Ëá	1.22	C9H14N3O8P	323.197	Nucleotide And Its Derivates	ºËÜÕËá¼°ÆäÑÜÉúÎï	"84-52-6"	43900	271800	241200	53280	186900	129800	1.50521649818909	0.589971007517	0.724629779750689	0.666666666666667	0.493209024950309
Com_254_neg	D-Arabinose 5-phosphate	D-°¢À­²®ÌÇ5-Á×Ëáõ¥	0.9	C5H11O8P	230.11	Carbohydrates And Its Derivatives	ÌÇÀà¼°ÆäÑÜÉúÎï	"13137-52-5"	2706000	7728000	5988000	3416000	2938000	3987000	1.58804757760371	0.667254135998	0.352126323331297	0.666666666666667	0.746448384172511
Com_255_neg	L-Adrenaline	ÉöÉÏÏÙËØ	1.034	C9H13NO3	183.204	Hormones	¼¤ËØ	"51-43-4"	47750	27780	32450	56950	32170	60110	0.723581049386853	-0.466773470667	0.292445257430715	0.777777777777778	1.3963542732784
Com_256_neg	Prostaglandin E2	Ç°ÁÐÏÙËØE2	9.378	C20H32O5	352.465	Hormones	¼¤ËØ	"363-24-6"	6385	14340	4912	4489	3514	32410	0.634375077326603	-0.656592001846	0.959659762392452	0.666666666666667	0.196472765206681
Com_257_neg	L-Ascorbate	¿¹»µÑªËá	1.03	C6H8O6	176.12	Vitamins	Î¬ÉúËØ	"50-81-7"	2429000	2502000	1065000	1310000	1055000	2457000	1.24346744089589	0.314368732345	0.599861848944513	0.666666666666667	0.605807413373976
Com_258_neg	4-Amino-5-imidazolecarboxamide	5-°±»ùßäßò-4-ôÈËá°·	0.915	C4H6N4O	126.12	Organoheterocyclic compounds	ÓÐ»úÔÓ»·»¯ºÏÎï	"360-97-4"	13170	10790	16340	12850	11810	28840	0.753271028037383	-0.408759052761	0.548110592502879	0.444444444444444	0.642290986122894
Com_259_neg	Xanthine	»ÆàÑßÊ	1.714	C5H4N4O2	152.11	Nucleotide And Its Derivates	ºËÜÕËá¼°ÆäÑÜÉúÎï	"69-89-6"	1901000	3017000	1541000	3392000	1530000	3819000	0.738931472371582	-0.43648751814	0.488635544682675	0.666666666666667	0.941146693288061
Com_25_neg	dCMP	2'-ÍÑÑõ°ûÜÕ-5'-µ¥Á×Ëá	1.04	C9H14N3O7P	307.197	Nucleotide And Its Derivates	ºËÜÕËá¼°ÆäÑÜÉúÎï	"1032-65-1"	42810	38380	33520	40310	72820	91690	0.560052729225662	-0.836365430912	0.155125291268424	0.888888888888889	1.86243434187046
Com_260_neg	4-Hydroxybenzoic acid	4-ôÇ»ù±½¼×Ëá	5.379	C7H6O3	138.12	Benzoic Acid And Its Derivatives	±½¼×Ëá¼°ÆäÑÜÉúÎï	"99-96-7"	335600	295000	318300	279100	342300	290300	1.04080289568937	0.0576968809951	0.596929929000797	0.666666666666667	0.891647421693947
Com_261_neg	Deoxyinosine	2-ÍÑÑõ¼¡ÜÕ	3.33	C10H12N4O4	252.23	Nucleotide And Its Derivates	ºËÜÕËá¼°ÆäÑÜÉúÎï	"890-38-0"	176800	173100	79650	153200	117200	150400	1.02079372623574	0.029691367487	0.911141248933623	0.666666666666667	0.176849862732807
Com_262_neg	Indoxylsulfuric acid	ßÅßáÁòËá	5.62	C8H7NO4S	213.21	Organic Acid And Its Derivatives	ÓÐ»úËá¼°ÆäÑÜÉúÎï	"487-94-5"	6030	3773	5586	5437	4840	3900	1.08549058333921	0.118347210588	0.70730971247428	0.666666666666667	0.312174428515066
Com_263_neg	Glutaric Acid	Îì¶þËá	0.7	C5H8O4	132.115	Organic Acid And Its Derivatives	ÓÐ»úËá¼°ÆäÑÜÉúÎï	"110-94-1"	1533000	1537000	1614000	2824000	2192000	2437000	0.628471756339729	-0.67008018382	0.0203097019932671	1	2.06553500277018
Com_264_neg	N-Acetyl-Asp-Glu	N-ÒÒõ£-Ìì¶¬°±Ëá-¹È°±Ëá	2.02	C11H16N2O8	304.253	Amino Acid And Its Derivatives	°±»ùËá¼°ÆäÑÜÉúÎï	"3106-85-2"	543900	335800	116300	634600	194700	666400	0.665908938958347	-0.586603188304	0.499290508206263	0.777777777777778	0.971915909248513
Com_265_neg	N-lactoyl-phenylalanine	N-Èéõ£»ù±½±û°±Ëá	6.97	C12H15NO4	237.25	Amino Acid And Its Derivatives	°±»ùËá¼°ÆäÑÜÉúÎï		289800	229400	120400	416100	256300	180700	0.749736256007502	-0.415544924704	0.458391664924194	0.666666666666667	1.01558931112043
Com_266_neg	Orotidine	ÈéÇåÜÕ	1.0	C10H12N2O8	288.211	Nucleotide And Its Derivates	ºËÜÕËá¼°ÆäÑÜÉúÎï	"314-50-1"	7100	13160	20800	17800	12510	22760	0.773695119653288	-0.370162921303	0.433683403817064	0.666666666666667	1.07614645774183
Com_267_neg	NADH	»¹Ô­ÐÍ¸¨Ã¸¢ñ	2.79	C21H29N7O14P2	665.441	Co-Enzyme Factor	¸¨Ã¸Òò×Ó	"58-68-4"	1721000	900600	179900	2146000	2166000	1377000	0.492441553875901	-1.02197558846	0.25727349085284	0.888888888888889	1.12925114897263
Com_268_neg	Chenodeoxycholic acid	¶ìÈ¥Ñõµ¨Ëá	11.768	C24H40O4	392.57	Bile Acids	µ¨Ö­Ëá	"474-25-9"	26742	16970	23525	14940	23168	10440	1.38495921562165	0.469843492313	0.263526847002913	0.888888888888889	0.564461494148239
Com_269_neg	Deoxycholic acid	ÍÑÑõµ¨Ëá	11.976	C24H40O4	392.57	Bile Acids	µ¨Ö­Ëá	"83-44-3"	22950	22320	23440	21210	23940	30500	0.908261731658956	-0.138819999403	0.51104123639527	0.666666666666667	0.623769613566471
Com_26_neg	Pantetheine	·ºõ£ÛÏ»ùÒÒ°·	5.84	C11H22N2O4S	278.13	Amino Acid And Its Derivatives	°±»ùËá¼°ÆäÑÜÉúÎï	"496-65-1"	34450	45180	75150	36250	128800	60700	0.68562569213732	-0.544506922974	0.540204412763197	0.666666666666667	0.700431525134808
Com_270_neg	lithocholic acid	Ê¯µ¨Ëá	11.159	C24H40O3	376.57	Bile Acids	µ¨Ö­Ëá	"434-13-9"	1995000	1478000	2622000	2167000	1471000	3158000	0.896851088875809	-0.157059631677	0.766831305740529	0.555555555555556	0.399301895145422
Com_271_neg	Cholic acid	µ¨Ëá	10.361	C24H40O5	408.57	Bile Acids	µ¨Ö­Ëá	"81-25-4"	18190	79090	3342	32440	78790	64160	0.573704316095558	-0.801620723165	0.326327460500909	0.666666666666667	1.12554578634421
Com_272_neg	Tauroursodeoxycholic acid Dihydrate	Å£»ÇÐÜÍÑÑõµ¨Ëá¶þË®ºÏÎï	9.015	C26H45NO6S.2H2O	535.7	Bile Acids	µ¨Ö­Ëá	"14605-22-2"	5079	18550	14350	45740	20980	38240	0.361842606707317	-1.46656580062	0.0900605811474056	1	2.16503067900957
Com_273_neg	Myristic acid	Èâ¶¹Þ¢Ëá	1.03	C14H28O2	228.371	Fatty Acyls	Ö¬·¾õ£Àà	"544-63-8"	3940000	589100	2747000	546100	317400	1354000	3.28121758737317	1.71423126646	0.207791385526344	0.888888888888889	1.42861136751909
Com_274_neg	gamma-Glutamylcysteine	5-L-¹È°±õ£-L-°ëë×°±Ëá	1.48	C8H14N2O5S	250.272	Amino Acid And Its Derivatives	°±»ùËá¼°ÆäÑÜÉúÎï	"636-58-8"	65170	86480	34880	98170	94300	35550	0.818042276993246	-0.289752690312	0.708854609797834	0.777777777777778	0.423693556375096
Com_275_neg	Sorbitol	É½Àæ´¼	0.91	C6H14O6	182.172	Sugar Alcohols	ÌÇ´¼	"50-70-4"	34590	26390	22430	16010	25750	20110	1.34814934540165	0.430980324365	0.181945227961466	0.888888888888889	1.17087574270286
Com_276_neg	Taurodeoxycholic acid sodium salt	Å£»ÇÍÑÑõµ¨ËáÄÆÑÎ	10.504	C26H44NNaO6S	521.69	Bile Acids	µ¨Ö­Ëá	"1180-95-6"	695100	3290000	827300	1205000	650800	5070000	0.694851136330821	-0.525224164362	0.768100396175772	0.555555555555556	0.375669195179153
Com_277_neg	Taurohyodeoxycholic acid sodium salt	Å£»ÇÖíÍÑÑõµ¨ËáÄÆÑÎ	8.928	C26H44NNaO6S	521.69	Bile Acids	µ¨Ö­Ëá	"110026-03-4"	8097	17060	13940	46600	25950	39070	0.350268769037807	-1.51346573582	0.021570408226612	1	2.34571850692265
Com_278_neg	L-SelenoMethionine	L-Îø´úµ°°±Ëá	18.27	C5H11NO2Se	196.11	Amino Acid And Its Derivatives	°±»ùËá¼°ÆäÑÜÉúÎï	"3211-76-5"	1350000	1414000	1388000	1365000	1347000	1382000	1.01416707376649	0.0202953413345	0.428873076481129	0.777777777777778	0.504942223033379
Com_279_neg	4-Hydroxyisoleucine	4-ôÇ»ù-L-ÒìÁÁ°±Ëá	1.038	C6H13NO3	147.172	Amino Acid And Its Derivatives	°±»ùËá¼°ÆäÑÜÉúÎï	"781658-23-9"	1667000	1264000	1173000	1556000	746100	1371000	1.11731235196428	0.160032557026	0.601701432239631	0.444444444444444	0.623017130308666
Com_27_neg	4-Hydroxy-2-oxoglutaric acid	4-ôÇ»ù-2-ÍªÎì¶þËá	0.74	C5H6O6	162.098	Organic Acid And Its Derivatives	ÓÐ»úËá¼°ÆäÑÜÉúÎï	"1187-99-1"	4153000	4928000	4545000	4597000	4859000	4603000	0.969201223415606	-0.0451318689936	0.578756602485555	0.666666666666667	0.683379534739253
Com_280_neg	Ala-Gln	L-±û°±õ£-L-¹È°±õ£°·	0.85	C8H15N3O4	217.22	Amino Acid And Its Derivatives	°±»ùËá¼°ÆäÑÜÉúÎï	"39537-23-0"	1343000	908000	1631000	735700	627600	323700	2.30112625963248	1.20234014443	0.0545363451686157	1	2.13531792686967
Com_281_neg	O-Aceyl-L-Serine	O-ÒÒõ£»ù-l-Ë¿°±Ëá	1.056	C5H9NO4	147.129	Amino Acid And Its Derivatives	°±»ùËá¼°ÆäÑÜÉúÎï	"5147-00-2"	20010	3872	23270	18170	10600	9843	1.22114313832129	0.288232318133	0.980053100104479	0.666666666666667	0.0638963642192108
Com_282_neg	(S)-Leucic acid	ôÇ»ùÒì¼ºËáÒÒõ¥	6.404	C6H12O3	132.16	Organic Acid And Its Derivatives	ÓÐ»úËá¼°ÆäÑÜÉúÎï	"13748-90-8"	74980	62710	111200	54340	45450	54330	1.6149104593823	0.691454175206	0.102879339905882	1	2.03597800500844
Com_283_neg	Lactose	ÈéÌÇ	0.911	C12H22O11	342.3	Carbohydrates And Its Derivatives	ÌÇÀà¼°ÆäÑÜÉúÎï	"63-42-3"	70550	183800	130100	90620	53540	83520	1.68855411103303	0.755788412374	0.232744232636141	0.777777777777778	1.44497568473994
Com_284_neg	3-Hydroxyisovalerate	¦Â-ôÇ»ùÒìÎìËá	4.084	C5H10O3	118.13	Organic Acid And Its Derivatives	ÓÐ»úËá¼°ÆäÑÜÉúÎï	"625-08-1"	81090	105600	85350	67950	70230	85670	1.21527808800536	0.281286478671	0.149791459087942	0.777777777777778	1.65631958410931
Com_285_neg	5-Hydroxymethyluracil	5-ôÇ¼×»ùÄòà×à¤	1.041	C5H6N2O3	142.11	Nucleotide And Its Derivates	ºËÜÕËá¼°ÆäÑÜÉúÎï	"4433-40-3"	18170	21710	19040	17320	11000	21190	1.19006261361341	0.251037481074	0.399272590550534	0.777777777777778	1.00887147425864
Com_286_neg	9-HpOTrE	9-ôÇ»ù¹ýÑõÊ®°ËÌ¼ÈýÏ©Ëá	10.92	C18H30O4	310.1	Fatty Acyls	Ö¬·¾õ£Àà	"111004-08-1"	271600	286900	300500	301800	297700	315800	0.93849011253141	-0.091586549274	0.149652897152746	0.888888888888889	1.7438028181053
Com_287_neg	N-Acetylalanine	N-ÒÒõ£-L-±û°±Ëá	2.15	C5H9NO3	131.13	Amino Acid And Its Derivatives	°±»ùËá¼°ÆäÑÜÉúÎï	"97-69-8"	278600	389700	199500	253400	201900	209600	1.30515867047676	0.384225208477	0.351197887872659	0.666666666666667	1.20724811542926
Com_288_neg	Methyl beta-D-galactopyranoside	¼×»ù-¦Â-D-ßÁà«°ëÈéÌÇÜÕ	1.03	C7H14O6	194.182	Carbohydrates And Its Derivatives	ÌÇÀà¼°ÆäÑÜÉúÎï	"1824-94-8"	7142	6600	9290	5438	4515	8820	1.22686837479359	0.294980477021	0.373017897877501	0.777777777777778	0.751973494684044
Com_289_neg	Lysops 22:6	ÈÜÑªÂÑÁ×Ö¬õ£Ë¿°±Ëá22:6	13.14	C28H44NO9P	569.62	Phospholipid	Á×Ö¬		54820	88710	56470	77210	59770	89550	0.882885269059286	-0.179702123054	0.526775475743815	0.777777777777778	0.806619206733362
Com_28_neg	beta-Hydroxyisobutyrate	¦Â-ôÇ»ùÒì¶¡Ëá	2.4	C4H8O3	104.104	Organic Acid And Its Derivatives	ÓÐ»úËá¼°ÆäÑÜÉúÎï	"2068-83-9"	753300	828800	311000	379000	346100	515000	1.52657043786791	0.610294158833	0.381009575162719	0.666666666666667	1.19426327296866
Com_290_neg	Lysope 18:1	ÈÜÑªÂÑÁ×Ö¬õ£ÒÒ´¼°·18:1	12.81	C23H46NO7P	479.588	Phospholipid	Á×Ö¬		561000	658900	435900	479000	238800	603600	1.25306493113365	0.325461173955	0.42698807345898	0.666666666666667	1.13928263097272
Com_291_neg	Hydroxyglutaric acid	2-ôÇ»ù-Îì¶þËá	1.45	C5H8O5	148.11	Organic Acid And Its Derivatives	ÓÐ»úËá¼°ÆäÑÜÉúÎï	"13095-47-1"	330700	175400	143400	145500	212800	185200	1.19503219871205	0.257049490421	0.685422498675507	0.555555555555556	0.560615220940219
Com_292_neg	Hydroxypyruvic acid	3-ôÇ»ù-2-Ñõ´ú±ûËá	2.17	C3H4O4	104.061	Organic Acid And Its Derivatives	ÓÐ»úËá¼°ÆäÑÜÉúÎï	"1113-60-6"	7405000	8460000	980300	4802000	5516000	3677000	1.20366559485531	0.267434634909	0.847124266809153	0.666666666666667	0.261663929532919
Com_293_neg	IDP	¶þÁ×Ëá¼¡¸Ê	1.02	C10H13N4O15P3	522.149	Nucleotide And Its Derivates	ºËÜÕËá¼°ÆäÑÜÉúÎï	"86-04-4"	1710000	1280000	1104000	3792000	1371000	1244000	0.638988606211956	-0.646137888141	0.461207970471785	0.666666666666667	0.666911192757945
Com_294_neg	alpha-D-Galactose 1-phosphate	¦Á-D-°ëÈéÌÇ-1-Á×Ëá	0.87	C6H13O9P	260.136	Sugar Acids And Its Derivatives	ÌÇËá¼°ÆäÑÜÉúÎï	"2255-14-3"	169500000	231100000	124800000	141900000	158000000	49910000	1.50195820588319	0.586844668376	0.31800412288294	0.777777777777778	1.00338107417931
Com_295_neg	Gamma-Glu-Leu	¦Ã-¹È°±Ëá-ÁÁ°±Ëá	5.09	C11H20N2O5	260.287	Organic Acid And Its Derivatives	ÓÐ»úËá¼°ÆäÑÜÉúÎï	"2566-39-4"	19000	24300	20230	11690	12660	20850	1.40553097345133	0.491115246498	0.167580090389245	0.777777777777778	1.67055974147601
Com_296_neg	N-Acetyl-D-glucosamine 6-phosphate	6-Á×Ëá-NÒÒõ£-D-°±»ùÆÏÌÑÌÇ	1.81	C8H16NO9P	301.188	Sugar Acids And Its Derivatives	ÌÇËá¼°ÆäÑÜÉúÎï		99940	161100	116900	153200	45860	83770	1.33627974401584	0.418222060998	0.387339482551824	0.777777777777778	0.951106403904911
Com_297_neg	Glycerol-3-phosphate	¸ÊÓÍÁ×Ëáõ¥	0.9	C3H9O6P	172.074	Fatty Acyls	Ö¬·¾õ£Àà	"57-03-4"	60780000	3050000	38410000	2799000	2094000	16510000	4.77690043451853	2.25607480687	0.282151638820262	0.888888888888889	1.17601111560821
Com_298_neg	DL-3,4-Dihydroxyphenyl glycol	DL-3,4-¶þôÇ»ù±½»ù¶þ´¼	7.37	C8H10O4	170.163	Benzene and substituted derivatives	±½¼°ÆäÑÜÉúÎï	"28822-73-3"	36600	36460	37980	37740	36220	33660	1.03177847983646	0.0451332611235	0.444868395302137	0.777777777777778	0.863733385731861
Com_299_pos	Lysopc 16:1	ÈÜÑªÂÑÁ×Ö¬õ£µ¨¼î16:1	11.75	C24H48NO7P	493.61	Phospholipid	Á×Ö¬		75750	252700	39700	84460	38030	117400	1.53466171995498	0.617920682483	0.736036318869348	0.444444444444444	0.509726997949373
Com_29_neg	Undecanedioic acid	Ê®Ò»Íé¶þËá	8.77	C11H20O4	216.27	Fatty Acyls	Ö¬·¾õ£Àà	"1852-04-6"	401300	397300	414400	425800	393500	391300	1.00198248802247	0.00285729429768	0.937647656874044	0.666666666666667	0.392081063415962
Com_2_neg	2,3-Dinor-TXB2	2,3-¶þÕýÄýÑª¶ñÍé	0.97	C18H30O6	342.427	Eicosanoid	Ñõ»¯Ö¬ÖÊ	"63250-09-9"	59710	28670	26500	39390	33130	22850	1.20457166823949	0.268520231964	0.674236060609152	0.444444444444444	0.505143275434417
Com_300_pos	Lysopc 16:2 (2N Isomer)	ÈÜÑªÁ×Ö¬õ£µ¨¼î16:2	11.13	C24H46NO7P	491.308	Phospholipid	Á×Ö¬		9995	9443	6773	4992	3932	10460	1.35219768881552	0.435306086402	0.32986132230705	0.666666666666667	1.23339983228795
Com_301_pos	Lysopc 15:0	ÈÜÑªÁ×Ö¬õ£µ¨¼î15:0	12.93	C23H48NO7P	481.317	Phospholipid	Á×Ö¬		449500	1281000	359900	626600	398200	376500	1.49175765360736	0.577013178799	0.582603672235837	0.555555555555556	0.815535384707556
Com_302_pos	Lysopc 16:0	ÈÜÑªÂÑÁ×Ö¬õ£µ¨¼î16:0(2nÒì¹¹)	12.57	C24H50NO7P	495.63	Phospholipid	Á×Ö¬		2665000	7009000	2161000	3884000	2111000	4121000	1.16992882562278	0.226420763959	0.896250851778498	0.444444444444444	0.320632441359905
Com_303_pos	Lysopc 18:2	ÈÜÑªÂÑÁ×Ö¬õ£µ¨¼î18:2	12.16	C26H50NO7P	519.65	Phospholipid	Á×Ö¬		5433000	5498000	3264000	4873000	3476000	3910000	1.15792478995024	0.211541549796	0.559465751746101	0.666666666666667	0.551685337782675
Com_304_pos	Lysopc 18:3	ÈÜÑªÁ×Ö¬õ£µ¨¼î18:3	12.57	C26H48NO7P	517.317	Phospholipid	Á×Ö¬		928200	2839000	803100	1407000	825700	1463000	1.23665340801472	0.306441218502	0.879162094127352	0.555555555555556	0.336156275861586
Com_305_pos	Lysopc 17:0	ÈÜÑªÁ×Ö¬õ£µ¨¼î17:0	13.17	C25H52NO7P	509.657	Phospholipid	Á×Ö¬	"50930-23-9"	23730	45460	16240	34020	21090	30310	1.0001170686022	0.0001688844065	0.843266971406241	0.555555555555556	0.393729556336745
Com_306_pos	Lysopc 18:1	ÈÜÑªÂÑÁ×Ö¬õ£µ¨¼î18:1	12.9	C26H52NO7P	521.667	Phospholipid	Á×Ö¬	"3542-29-8"	5657000	5105000	2993000	4747000	2681000	5182000	1.09080095162569	0.125387863988	0.768126107304901	0.666666666666667	0.371254643910001
Com_307_pos	Lysine Butyrate	Àµ°±Ëá¶¡Ëá	0.9	C10H22N2O4	234.293	Amino Acid And Its Derivatives	°±»ùËá¼°ÆäÑÜÉúÎï	"80407-71-2"	3069000	5948000	8404000	3884000	2585000	9627000	1.08231858846919	0.114125229618	0.769297665747257	0.555555555555556	0.391590729817521
Com_308_pos	Lysopc 14:0	ÈÜÑªÂÑÁ×Ö¬õ£µ¨¼î14:0	11.37	C22H46NO7P	467.577	Phospholipid	Á×Ö¬	"20559-16-4"	24450	58930	20010	25450	15390	44680	1.20895696913003	0.273762895102	0.731802424894456	0.444444444444444	0.394280309549477
Com_309_pos	Isovalerylcarnitine	ÒìÎìÈâ¼î	5.66	C12H23NO4	245.32	Carnitine	Èâ¼îÀà	"31023-24-2"	1666000	2801000	2621000	1345000	2880000	1742000	1.18786659963131	0.248372827	0.516866561942882	0.555555555555556	0.840531668130283
Com_30_neg	Nonadecanoic acid	ÕýÌ¼Ê®¾ÅËá	18.28	C19H38O2	298.5	Fatty Acyls	Ö¬·¾õ£Àà	"646-30-0"	904300	829800	739100	858600	1022000	828800	0.912822027017052	-0.131594489627	0.359474912081923	0.666666666666667	0.539156668257133
Com_310_pos	3-Hydroxy-butyryl carnitine	3-ôÇ»ù¶¡õ£»ùÈâ¼î	1.91	C11H21NO5	247.291	Carnitine	Èâ¼îÀà	"1469900-92-2"	1326000	2091000	659400	479300	428300	676300	2.57364732622009	1.36381437074	0.109903627590644	0.888888888888889	1.30167988401703
Com_311_pos	Arachidonoylcarnitine	»¨ÉúËÄÏ©ËáÈâ¼î	11.42	C27H46NO4	448.668	Carnitine	Èâ¼îÀà	"36816-11-2"	296600	156700	204100	314600	207400	256900	0.844010784439594	-0.244666661644	0.445822493497289	0.777777777777778	0.964536467146934
Com_312_pos	Carnitine-C3	Èâ¶¾¼î-C3	2.56	C10H17NO4	217.3	Carnitine	Èâ¼îÀà		2148000	2858000	4814000	3222000	4023000	4352000	0.846770716564629	-0.239956716658	0.466074009078201	0.666666666666667	0.811332381192014
Com_313_pos	Carnitine-C4	Èâ¶¾¼î-C4	4.63	C11H21NO4	231.3	Carnitine	Èâ¼îÀà		25420000	16140000	8980000	18050000	22930000	13790000	0.922767938652547	-0.115960216084	0.69362454517463	0.555555555555556	0.485005741757444
Com_314_pos	Cycloleucine	»·ÁÁ°±Ëá	0.84	C6H11NO2	129.157	Amino Acid And Its Derivatives	°±»ùËá¼°ÆäÑÜÉúÎï	"52-52-8"	21490000	22150000	27350000	23830000	19440000	22780000	1.07479182437547	0.10405725235	0.515254478844172	0.444444444444444	0.512344618911068
Com_315_pos	cis-gondoic acid	»¨ÉúÓÍËá	16.03	C20H38O2	310.515	Fatty Acyls	Ö¬·¾õ£Àà	"26764-41-0"	1409000	532400	583700	1071000	621500	701000	1.05498224357635	0.0772187171126	0.955647822208775	0.666666666666667	0.14355435122801
Com_316_pos	Pantethine	D-·ºÁòÒÒ°·	0.85	C22H42N4O8S2	554.721	Amino Acid And Its Derivatives	°±»ùËá¼°ÆäÑÜÉúÎï	"16816-67-4"	7817	12670	10030	8234	6304	8084	1.348996552029	0.431886660831	0.168713657864814	0.777777777777778	1.11600055876311
Com_317_pos	D-Myo-inositol 4,5-bisphosohate	D-ÏËÎ¬´¼-4,5-¶þÁ×Ëá	0.97	C6H14O12P2	340.116	Alcohols and polyols	´¼Àà¼°Æä¶àÔª´¼	"47055-78-7"	124500	187100	93060	157300	142900	155300	0.888386388583974	-0.170740806092	0.516129492591138	0.666666666666667	0.911487556578443
Com_318_pos	Glu-Glu	¹È°±õ£-¹È°±Ëá	1.0	C10H16N2O7	276.243	Amino Acid And Its Derivatives	°±»ùËá¼°ÆäÑÜÉúÎï	"3929-61-1"	335900	341100	131300	595700	949200	198700	0.463581096581785	-1.10910635603	0.306210401132122	0.777777777777778	0.987690904786691
Com_319_pos	Ectoine	ÒÀ¿Ë¶àÒò	0.95	C6H10N2O2	142.156	Others	ÆäËü	"96702-03-3"	909700	625000	724500	2340000	1726000	1161000	0.432217333078248	-1.21017116558	0.037588009237071	1	1.77416143167326
Com_31_neg	Monobutyl phthalate	ÁÚ±½¶þ¼×Ëáµ¥¶¡õ¥	9.719	C12H14O4	222.24	Organic Acid And Its Derivatives	ÓÐ»úËá¼°ÆäÑÜÉúÎï	"131-70-4"	140100	162400	154200	152000	161200	155400	0.974605206999573	-0.0371101644848	0.604410050184693	0.555555555555556	0.737755888085742
Com_320_pos	Cadaverine	1,5-¶þ°±»ùÎìÍé	0.706	C5H14N2	102.18	Polyamine	¶à°·	"462-94-2"	7677	7330	5331	7834	10290	16300	0.590808738089705	-0.759236931098	0.133547723747291	1	1.54184089249118
Com_321_pos	N-Acetylneuraminic acid	N-ÒÒõ£Éñ¾­°±Ëá	0.988	C11H19NO9	309.27	Amino Acid And Its Derivatives	°±»ùËá¼°ÆäÑÜÉúÎï	"131-48-6"	92500	75090	52500	99290	48240	147100	0.747004717781624	-0.420810740362	0.591357985134758	0.666666666666667	0.663733921461592
Com_322_pos	Palmitoylethanolamide	×ØéµÒÒ´¼°·	14.399	C18H37NO2	299.49	Organic Acid And Its Derivatives	ÓÐ»úËá¼°ÆäÑÜÉúÎï	"544-31-0"	24410	39190	32840	25620	27420	33580	1.11336873701224	0.154931478535	0.590364692480686	0.555555555555556	0.729581549860618
Com_323_pos	Dehydrocholic acid	¶ìÈ¥Çâµ¨Ëá	12.273	C24H34O5	402.52	Bile Acids	µ¨Ö­Ëá	"81-23-2"	12790	8999	12170	6055	8430	9548	1.41301543710731	0.498777227113	0.117378709459177	0.888888888888889	1.77641656577237
Com_324_pos	Uracil	Äòà×à¤	1.47	C4H4N2O2	112.09	Nucleotide And Its Derivates	ºËÜÕËá¼°ÆäÑÜÉúÎï	"66-22-8"	117300	141000	108547	110478	138000	159900	0.898302553026853	-0.154726660793	0.488504882366216	0.666666666666667	0.573211136311413
Com_325_pos	Estradiol Benzoate	±½¼×Ëá´Æ¶þ´¼	14.023	C25H28O3	376.49	Hormones	¼¤ËØ	"50-50-0"	3711	10704	2531	1831	9236	3348	1.1755809920222	0.233373937344	0.779726872721994	0.666666666666667	0.4220604318047
Com_326_pos	L-Tryptophan	L-É«°±Ëá	4.894	C11H12N2O2	204.23	Amino Acid And Its Derivatives	°±»ùËá¼°ÆäÑÜÉúÎï	"73-22-3"	40080000	43860000	31420000	38400000	23990000	26720000	1.29457973291438	0.372483823282	0.203988322593014	0.888888888888889	1.54833625723536
Com_327_pos	Erucamide	½æËáõ£°·	16.97	C22H43NO	337.6	Fatty Acyls	Ö¬·¾õ£Àà	"112-84-5"	45570000	46870000	47120000	47490000	54970000	48520000	0.924360842495695	-0.113471948814	0.231203565105337	1	1.61478527073707
Com_328_pos	Hexadecanamide	Ê®ÁùÌ¼õ£°·	14.82	C16H33NO	255.44	Fatty Acyls	Ö¬·¾õ£Àà	"629-54-9"	40220000	18470000	20420000	31770000	22740000	25360000	0.990484537373231	-0.0137936417606	0.828589873845388	0.666666666666667	0.234628193277966
Com_329_pos	N-Lauryldiethanolamine	Ê®¶þÍé»ùÒÒ´¼°·	9.45	C16H35NO2	273.45	Amines	°·Àà	"1541-67-9"	27060	24760	26000	27570	22450	23230	1.06238907849829	0.0873122207759	0.428037915974904	0.666666666666667	1.15395482950238
Com_32_neg	D-Ribose	D-ºËÌÇ	0.92	C5H10O5	150.13	Carbohydrates And Its Derivatives	ÌÇÀà¼°ÆäÑÜÉúÎï	"50-69-1"	45920	76290	62960	55930	49860	61830	1.10470110965279	0.143656083689	0.648150351206649	0.666666666666667	0.599669554210421
Com_330_pos	2-Aminoethylphosphonate	2-°±»ùÒÒ»ùÁ×Ëáõ¥	0.98	C2H8NO3P	125.06	Organic Acid And Its Derivatives	ÓÐ»úËá¼°ÆäÑÜÉúÎï	"2041-14-7"	1024000	968900	937700	1160000	975800	1173000	0.885698742746615	-0.175112023931	0.174554956507379	0.888888888888889	1.00946511884298
Com_331_pos	6-Methylmercaptopurine	6-¼×»ùÛÏàÑßÊ	4.04	C6H6N4S	166.21	Purines and purine derivatives	àÑßÊ¼°ÆäÑÜÉúÎï	"50-66-8"	7900000	9365000	7431000	10130000	5339000	5783000	1.16205533596838	0.216678770142	0.455039575678756	0.666666666666667	1.08184196442928
Com_332_pos	2-Hydroxycinnamate	2-ôÇ»ùÈâ¹ðËá	1.81	C9H8O3	164.16	Cinnamic acids and derivatives	Èâ¹ðËá¼°ÆäÑÜÉúÎï	"614-60-8"	2855000	3509000	2192000	3057000	1538000	1739000	1.35080517840227	0.433819615137	0.271594658211137	0.777777777777778	1.48598527915918
Com_333_pos	Piperidine	ßßà¤	2.04	C5H11N	85.15	Organoheterocyclic compounds	ÓÐ»úÔÓ»·»¯ºÏÎï	"110-89-4"	465800	592400	349300	511700	210900	281600	1.40161322445728	0.487088292187	0.287175868065481	0.777777777777778	1.17649723943257
Com_334_pos	Isoquinoline	Òìà­ßø	4.9	C9H7N	129.16	Organoheterocyclic compounds	ÓÐ»úÔÓ»·»¯ºÏÎï	"119-65-3"	31230	33530	24430	21860	18110	18790	1.51786929884275	0.602047568073	0.0299472187710495	1	2.28912501951487
Com_335_pos	Purine	àÑßÊ	4.1	C5H4N4	120.112	Nucleotide And Its Derivates	ºËÜÕËá¼°ÆäÑÜÉúÎï	"120-73-0"	41040	53730	42670	56350	32090	32990	1.13184550769991	0.178677049613	0.509374193377028	0.666666666666667	1.07254751133674
Com_336_pos	S-Methyl-5'-thioadenosine	S-¼×»ù-5'-ÁòÏÙàÑßÊ	4.94	C11H15N5O3S	297.333	Nucleotide And Its Derivates	ºËÜÕËá¼°ÆäÑÜÉúÎï		898700	1088000	743800	820200	903600	723000	1.1159473598169	0.158268975624	0.478547597537838	0.666666666666667	0.96873026255414
Com_337_pos	Isobutyrylglycine	2-(Òì¶¡»ù°±»ù)ÒÒËá	0.63	C6H11NO3	145.156	Organic Acid And Its Derivatives	ÓÐ»úËá¼°ÆäÑÜÉúÎï	"15926-18-8"	9476000	11510000	11250000	13850000	11190000	19390000	0.725545802385775	-0.462861403009	0.194712914500607	0.777777777777778	1.86023729915622
Com_338_pos	(5-L-Glutamyl)-L-Amino Acid	5-L-¹È°±õ£-L-±û°±Ëá	1.18	C8H14N2O5	218.207	Amino Acid And Its Derivatives	°±»ùËá¼°ÆäÑÜÉúÎï	"5875-41-2"	1135000	569900	956100	353900	672600	90360	2.38257256952528	1.25252015709	0.190979376635727	0.888888888888889	1.8796531002706
Com_339_pos	Fexofenadine	·ÇË÷·ÇÄÇ¶¨	12.04	C32H39NO4	501.656	Others	ÆäËü	"83799-24-0"	706600	809600	490200	762500	483700	526800	1.13164128595601	0.178416717016	0.582708863537043	0.666666666666667	0.576798963457539
Com_33_neg	2-Hydroxy-3-methylbutanoic acid	2-ôÇ»ù-3-¼×»ù¶¡Ëá	4.932	C5H10O3	118.13	Fatty Acyls	Ö¬·¾õ£Àà	"4026-18-0"	266300	353300	237900	214300	236000	170000	1.38239561502499	0.467170546376	0.107384065506771	1	1.77540831221256
Com_340_pos	Feruloylcholine	°¢Îºõ£µ¨¼î	14.42	C15H22NO4	280.34	Cholines	µ¨¼îÀà		1016000	734100	708100	908500	703000	713900	1.05710845445945	0.0801233981815	0.748568186660552	0.666666666666667	0.426213131390279
Com_341_pos	Gly-Phe	¸Ê°±õ£-±½±û°±Ëá	4.88	C11H14N2O3	222.24	Amino Acid And Its Derivatives	°±»ùËá¼°ÆäÑÜÉúÎï	"3321-03-7"	163400	232900	147000	165100	142300	159200	1.16438062580369	0.219562739687	0.440977368758523	0.666666666666667	0.42182480729748
Com_342_pos	Glycerol 1-hexadecanoate	µ¥×ØéµËá¸ÊÓÍõ¥	13.72	C19H38O4	330.503	Glycerolipids	¸ÊÓÍÖ¬Àà	"542-44-9"	24860	19700	33050	36780	59720	40000	0.568571428571429	-0.814586491289	0.0560712479000684	1	2.11648954888716
Com_343_pos	gamma-Muurolene	¦Ã-Ä¾ÂÞÏ©	4.87	C15H24	204.351	Fatty Acyls	Ö¬·¾õ£Àà	"24268-39-1"	222900	234100	183800	217100	122400	145400	1.3215095896061	0.402186894012	0.208994259468278	0.888888888888889	1.64015175611665
Com_344_pos	Galactinol	¼¡´¼°ëÈéÌÇÜÕ	0.95	C12H22O11	342.297	Carbohydrates And Its Derivatives	ÌÇÀà¼°ÆäÑÜÉúÎï	"3687-64-7"	83630	21500	64470	116000	36690	46150	0.852947093140213	-0.229471838492	0.763620029544166	0.444444444444444	0.516953936965423
Com_345_pos	Flavin Adenine Dinucleotide	»ÆËØÏÙàÑßÊ¶þºËÜÕËá	5.14	C27H33N9O15P2	785.55	Nucleotide And Its Derivates	ºËÜÕËá¼°ÆäÑÜÉúÎï	"146-14-5"	24290	21950	15340	18310	17900	21500	1.06705943510657	0.0936405363736	0.766167839619291	0.666666666666667	0.432952880744241
Com_346_pos	3-Hydroxy-3-Methylpentane-1,5-Dioic Acid	3-ôÇ»ù-3-¼×»ù¹È°±Ëá	0.87	C6H10O5	162.14	Fatty Acyls	Ö¬·¾õ£Àà	"503-49-1"	2446000	2690000	4046000	3576000	4405000	3175000	0.823054858372176	-0.280939502316	0.323184016833733	0.777777777777778	1.28178457212237
Com_347_pos	Oxidized glutathione	Ñõ»¯¹Èë×¸ÊëÄ	1.78	C20H32N6O12S2	612.6	Amino Acid And Its Derivatives	°±»ùËá¼°ÆäÑÜÉúÎï	"121-24-4"	442500	763900	109100	189900	247000	267800	1.86675180928054	0.90053012932	0.600783486034745	0.666666666666667	0.804672618182878
Com_348_pos	7,8-Dihydrofolate	7,8-¶þÇâÒ¶Ëá	0.8	C19H21N7O6	443.41	Organic Acid And Its Derivatives	ÓÐ»úËá¼°ÆäÑÜÉúÎï	"4033-27-6"	14430	16950	17470	4882	9377	19100	1.46437243322642	0.550282520313	0.310701448384155	0.666666666666667	1.454459443832
Com_349_pos	6-Deoxy-D-glucose	6-ÍÑÑõ-D-ÆÏÌÑÌÇ	1.825	C6H12O5	164.156	Carbohydrates And Its Derivatives	ÌÇÀà¼°ÆäÑÜÉúÎï	"7658-08-4"	535900	676500	401500	652600	286700	341400	1.26017021941126	0.333618621117	0.411225892248728	0.777777777777778	1.25133205425433
Com_34_neg	orotidine-5-phosphate	ÈéÇåËáºËÜÕ-5-Á×Ëá	2.75	C10H13N2O11P	368.19	Nucleotide And Its Derivates	ºËÜÕËá¼°ÆäÑÜÉúÎï		165100	818300	631900	599900	792200	383300	0.909823138447674	-0.136341969447	0.674627141602586	0.555555555555556	0.597306846790747
Com_350_pos	5-Aminopentanoate	5-°±»ùÎìËá	0.96	C5H11NO2	117.146	Organic Acid And Its Derivatives	ÓÐ»úËá¼°ÆäÑÜÉúÎï	"660-88-8"	193200	144100	297700	353600	288600	209200	0.745830396993188	-0.423080498235	0.298255017961888	0.777777777777778	0.981315632274628
Com_351_pos	5-Hydroxylysine	5-ôÇ»ùÀµ°±Ëá	0.72	C6H15ClN2O3	198.65	Amino Acid And Its Derivatives	°±»ùËá¼°ÆäÑÜÉúÎï	"13204-98-3"	97990	89920	103700	80500	79960	121100	1.03569399062367	0.0505978028087	0.742382293871354	0.666666666666667	0.500407621602814
Com_352_pos	5-Methoxyindole-3-acetic acid	5-¼×Ñõ»ùßÅßá-3-ÒÒËá	4.87	C11H11NO3	205.21	Indole And Its Derivatives	ßÅßá¼°ÆäÑÜÉúÎï	"3471-31-6"	439500	449700	360300	430000	273100	291000	1.25691580323911	0.329888011479	0.222272788008274	0.888888888888889	1.48816378277125
Com_353_pos	Pyridoxamine	ßÁ¶ß°·	1.0	C8H12N2O2	168.193	Pyridine And Its Derivatives	ßÁà¤¼°ÆäÑÜÉúÎï	"85-87-0"	61920	84740	83380	113400	67420	119700	0.765473179821643	-0.385576264538	0.321783851586474	0.777777777777778	1.27081911427016
Com_354_pos	5beta-Androstan-17beta-ol-3-one	5¦Â-ÐÛçÞÍé-17¦Â-´¼-3-Íª	0.84	C19H30O2	290.44	Hormones	¼¤ËØ	"571-22-2"	815100	949600	874200	948700	1050000	942400	0.897249328482541	-0.156419156584	0.128400449733411	0.777777777777778	1.17211209364227
Com_355_pos	Etiocholanolone	3a-ôÇ»ù-5b-ÐÛçÞÍé-17-Íª	0.68	C19H30O2	290.44	Hormones	¼¤ËØ	"53-42-9"	312200	347000	336700	324900	404200	389700	0.890150160886664	-0.167879367692	0.232296355150588	0.777777777777778	1.21720630127748
Com_356_pos	5beta-Androstan-3beta-ol-17-one	5¦Â-ÐÛçÞÍé-3¦Â-ôÇ»ù-17Íª	0.68	C19H30O2	290.44	Hormones	¼¤ËØ	"571-31-3"	278100	274900	280000	228400	311700	341900	0.944444444444445	-0.082462160192	0.759224771955781	0.666666666666667	0.592915406417873
Com_357_pos	Sarcosine	¼¡°±Ëá	0.9	C3H7NO2	89.093	Amino Acid And Its Derivatives	°±»ùËá¼°ÆäÑÜÉúÎï	"107-97-1"	21630000	17520000	18320000	17920000	13950000	17330000	1.16808943089431	0.224150733609	0.198643126057196	0.888888888888889	1.65163228437946
Com_358_pos	S-Adenosyl-methionine	S-ÏÙÜÕ-¼×Áò°±Ëá	0.84	C22H30N6O8S2	570.639	Amino Acid And Its Derivatives	°±»ùËá¼°ÆäÑÜÉúÎï	"17176-17-9"	5630000	5768000	4332000	4340000	5925000	4062000	1.09792699099602	0.13478212244	0.541488530689196	0.555555555555556	0.834450835123669
Com_359_pos	Vitamin B2	ºË»ÆËØB2	5.94	C17H20N4O6	376.364	Vitamins	Î¬ÉúËØ	"83-88-5"	42040	51500	44500	43540	42190	46500	1.04393859184754	0.0620368499895	0.592862110200957	0.555555555555556	0.607802188371391
Com_35_neg	2-Oxoadipic acid	2-Ñõ´ú¼º¶þËá	8.05	C6H8O5	160.125	Organic Acid And Its Derivatives	ÓÐ»úËá¼°ÆäÑÜÉúÎï	"3184-35-8"	1839000	1037000	1926000	1374000	1763000	996500	1.16172734970364	0.216271516776	0.618216133567975	0.777777777777778	0.655529281801808
Com_360_pos	R-Aminobutyrate	R-3-°±»ù¶¡Ëá	0.91	C4H9NO2	103.12	Organic Acid And Its Derivatives	ÓÐ»úËá¼°ÆäÑÜÉúÎï	"3775-73-3"	93490	57090	52280	90500	43280	65000	1.02052520374283	0.0293118128124	0.918394183339829	0.444444444444444	0.326872021704932
Com_361_pos	S-ribosyl-L-homocysteine	S-ºËÌÇ»ù-L-Í¬ÐÍ°ëë×°±Ëá	3.14	C9H17NO6S	267.3	Amino Acid And Its Derivatives	°±»ùËá¼°ÆäÑÜÉúÎï		281300	307600	276900	282800	307900	265200	1.01156677181914	0.0165915529095	0.832562687328006	0.555555555555556	0.166043136951913
Com_362_pos	Spermidine	ÑÇ¾«°·	0.68	C7H19N3	145.246	Polyamine	¶à°·	"124-20-9"	2684000	3664000	3780000	4179000	3478000	5782000	0.753627502046283	-0.408076480863	0.220601237603435	0.777777777777778	1.66366377648432
Com_363_pos	5-Aminolevulinate	5-°±»ùÒÒõ£±ûËá	2.07	C5H9NO3	131.13	Organic Acid And Its Derivatives	ÓÐ»úËá¼°ÆäÑÜÉúÎï	"106-60-5"	236100	342700	222100	300300	141500	165300	1.3192225333553	0.399687946461	0.318819208155956	0.777777777777778	1.09310417829609
Com_364_pos	5-Aminosalicylate	5-°±»ùË®ÑîËá	1.68	C7H7NO3	153.135	Organic Acid And Its Derivatives	ÓÐ»úËá¼°ÆäÑÜÉúÎï	"89-57-6"	424000	608100	676500	334500	346000	385400	1.60296463082841	0.680742592996	0.0740062283278669	1	1.78922841164622
Com_365_pos	N-(5-Aminopentyl)acetamide	N-(5-°±»ùÎì»ù)ÒÒõ£°·	1.01	C7H16N2O	144.21	Polyamine	¶à°·	"32343-73-0"	31910	24370	33810	38890	45200	20610	0.860458452722063	-0.21682256154	0.712646114712419	0.666666666666667	0.412510433256216
Com_366_pos	H-Trp-NH2.HCl	L-É«°±õ£°·ÑÎËáÑÎ	4.587	C11H14ClN3O	239.7	Amino Acid And Its Derivatives	°±»ùËá¼°ÆäÑÜÉúÎï	"5022-65-1"	53230	67900	111300	32400	36720	12470	2.84875597499694	1.51033204541	0.0633496081361901	1	2.09694796389246
Com_367_pos	Methylguanidine HCl	1-¼×»ùëÒÑÎËáÑÎ	0.88	C2H8ClN3	109.56	Organic Acid And Its Derivatives	ÓÐ»úËá¼°ÆäÑÜÉúÎï	"21770-81-0"	129400	167600	160700	128000	65830	84250	1.64592922899885	0.718902304674	0.0963460923517582	1	1.65877620600279
Com_368_pos	beta-Alanine methyl ester	3-°±»ù±ûËá¼×õ¥	0.98	C4H9NO2	103.12	Amino Acid And Its Derivatives	°±»ùËá¼°ÆäÑÜÉúÎï	"4138-35-6"	533300	368600	284100	417900	279200	375900	1.10531220876048	0.144453933789	0.734350291600422	0.444444444444444	0.409601566192122
Com_369_pos	Dihydrouracil	¶þÇâÄòà×à¤	6.15	C4H6N2O2	114.103	Pyrimidines and pyrimidine derivatives	à×à¤¼°ÆäÑÜÉúÎï	"504-07-4"	15680	22170	28320	18000	8550	32350	1.12342954159593	0.167909645499	0.630156395279452	0.555555555555556	0.567815308307993
Com_36_neg	Phosphonotyrosine	O-Á×ËáÀÒ°±Ëá	0.94	C9H12NO6P	261.168	Amino Acid And Its Derivatives	°±»ùËá¼°ÆäÑÜÉúÎï	"21820-51-9"	88470	98940	96940	109900	128000	144200	0.744176917037425	-0.426282453405	0.0491722656540349	1	1.92279273016155
Com_370_pos	Imidazoleacetic acid	ßäßòÒÒËá	0.91	C5H6N2O2	126.113	Organic Acid And Its Derivatives	ÓÐ»úËá¼°ÆäÑÜÉúÎï	"645-65-8"	2506000	4307000	2034000	2409000	3932000	975300	1.20921777401145	0.274074090074	0.577983988562291	0.666666666666667	0.505877505736115
Com_371_pos	1D-chiro-Inositol	D-ÊÖÐÔ¼¡´¼	18.32	C6H12O6	180.156	Phenols And Its Derivatives	·ÓÀà¼°ÆäÑÜÉúÎï	"643-12-9"	1356000	1391000	1478000	1122000	1016000	1044000	1.32778126964173	0.409017505726	0.00207841816295289	1	2.18046434644233
Com_372_pos	Isoproterenol	Òì±ûÉöÉÏÏÙËØ	8.36	C11H17NO3	211.258	Hormones	¼¤ËØ	"7683-59-2"	156000	163000	167500	180100	189500	165000	0.910026187803965	-0.136020032575	0.133421614699954	0.888888888888889	1.23872463126499
Com_373_pos	L-(-)-alpha-Amino-epsilon-Caprolactam	3-°±»ùÁùÇâ-2H-µªÔÓ×¿-2-Íª	0.7	C6H12N2O	128.172	Amino Acid And Its Derivatives	°±»ùËá¼°ÆäÑÜÉúÎï	"21568-87-6"	1453000	542600	1018000	346900	610900	625200	1.9037271004422	0.928826682923	0.168459089100075	0.777777777777778	1.87830097892371
Com_374_pos	L-Alanyl-L-leucine	L-±û°±õ£-L-ÁÁ°±Ëá	4.45	C9H18N2O3	202.251	Amino Acid And Its Derivatives	°±»ùËá¼°ÆäÑÜÉúÎï	"3303-34-2"	137600	312300	165200	119700	141900	125300	1.58981649004911	0.66886024716	0.244618324144114	0.888888888888889	0.762696733429761
Com_375_pos	Ip7G	ÒìÎìÏ©»ù-7-ÆÏÌÇÜÕ	0.96	C16H23N5O5	365.384	Nucleotide And Its Derivates	ºËÜÕËá¼°ÆäÑÜÉúÎï	"59384-58-6"	23320	11790	15260	17660	22640	11110	0.979770472670687	-0.0294842810921	0.950544735349172	0.444444444444444	0.0796066248324183
Com_376_pos	Isobutyryl carnitine	Òì¶¡õ£Èâ¼î	4.62	C11H21NO4	231.289	Carnitine	Èâ¼îÀà	"25518-49-4"	21540000	13820000	7665000	15260000	19920000	11870000	0.914452709883103	-0.129019530688	0.679537596382451	0.555555555555556	0.513100824233895
Com_377_pos	beta amino butyric acid	¦Â-°±»ù¶¡Ëá	0.98	C4H9NO2	103.12	Amino Acid And Its Derivatives	°±»ùËá¼°ÆäÑÜÉúÎï	"541-48-0"	674500	410700	792000	395500	568600	183800	1.63533408833522	0.709585399239	0.239376241980672	0.888888888888889	1.53341382873751
Com_378_pos	Adenine	ÏÙàÑßÊ	1.032	C5H5N5	135.127	Nucleotide And Its Derivates	ºËÜÕËá¼°ÆäÑÜÉúÎï	"73-24-5"	4274000	2001000	2097000	2933000	3256000	2199000	0.998092513113972	-0.00275454984088	0.859585972899291	0.666666666666667	0.0814569753116101
Com_379_pos	4-Pregnen-17alpha,20alpha-Diol-3-One	4-ÔÐÍé-17¦Á,20¦Á-¶þ´¼-3-Íª	0.87	C21H32O3	332.477	Hormones	¼¤ËØ	"652-69-7"	153700	181400	180900	205000	223000	160600	0.876656472986748	-0.18991647663	0.344571795427909	0.777777777777778	0.976234020210664
Com_37_neg	O-Desmethylnaproxen	(S)-2-(6-ôÇ»ù-2-ÝÁ)±ûËá	11.86	C13H12O3	216.233	Benzene and substituted derivatives	±½¼°ÆäÑÜÉúÎï	"52079-10-4"	22190	26220	20980	16230	17720	26250	1.15265780730897	0.20496427971	0.401386679891618	0.666666666666667	1.18629035614933
Com_380_pos	11-Ketoetiocholanolone	11-Íª±¾µ¨Íé´¼Íª	15.04	C19H28O3	304.424	Hormones	¼¤ËØ	"739-27-5"	131600	124800	89280	104500	58280	98020	1.32546012269939	0.406493266471	0.257492047165128	0.777777777777778	1.60914024709152
Com_381_pos	H-Gly-Pro-OH	¸Ê°±õ£-L-¸¬°±Ëá	1.035	C7H12N2O3	172.18	Amino Acid And Its Derivatives	°±»ùËá¼°ÆäÑÜÉúÎï	"704-15-4"	164700	170800	122700	147900	143900	155400	1.02459749552773	0.0350572704615	0.905517194700341	0.666666666666667	0.0584324078094152
Com_382_pos	L-Homocitrulline	L-¸ß¹Ï°±Ëá	0.972	C7H15N3O3	189.21	Amino Acid And Its Derivatives	°±»ùËá¼°ÆäÑÜÉúÎï	"1190-49-4"	156400	201800	203200	232300	178600	252100	0.846757164404223	-0.239979806487	0.29586160735647	0.777777777777778	1.3947276895635
Com_383_pos	Glycyl-L-leucine	N-¸Ê°±õ£-L-ÁÁ°±Ëá	4.466	C8H16N2O3	188.22	Amino Acid And Its Derivatives	°±»ùËá¼°ÆäÑÜÉúÎï	"869-19-2"	240300	357200	227000	251200	166500	199600	1.3356552729629	0.417547702302	0.205051904559022	0.777777777777778	0.832756648576458
Com_384_pos	5-Methylcytosine	5-¼×»ù°ûà×à¤	0.991	C5H7N3O	125.13	Nucleotide And Its Derivates	ºËÜÕËá¼°ÆäÑÜÉúÎï	"554-01-8"	556100	575400	529100	661200	619100	671100	0.850978784462437	-0.232804929994	0.00971474785149355	1	1.45778337655102
Com_385_pos	D-Proline	D-¸¬°±Ëá	0.967	C5H9NO2	115.13	Amino Acid And Its Derivatives	°±»ùËá¼°ÆäÑÜÉúÎï	"344-25-2"	61530000	65110000	55780000	55690000	30350000	39210000	1.45644710578842	0.542453307656	0.140564499418161	1	1.83453314309437
Com_386_pos	L-Hydroxyproline	L-ôÇ¸¬°±Ëá	0.88	C5H9NO3	131.13	Amino Acid And Its Derivatives	°±»ùËá¼°ÆäÑÜÉúÎï	"51-35-4"	35470000	33360000	36690000	36190000	37960000	31820000	0.995753515145796	-0.00613942737854	0.971769186962251	0.555555555555556	0.107748086734191
Com_387_pos	Glycyl-L-valine	¸Ê°±õ£-L-çÓ°±Ëá	2.077	C7H14N2O3	174.2	Amino Acid And Its Derivatives	°±»ùËá¼°ÆäÑÜÉúÎï	"1963-21-9"	122700	206700	75400	124600	154800	78720	1.13034736959678	0.176766198642	0.839485719531233	0.555555555555556	0.197828877652237
Com_388_pos	N6-Acetyl-L-lysine	N6-ÒÒõ£-L-Àµ°±Ëá	1.304	C8H16N2O3	188.22	Amino Acid And Its Derivatives	°±»ùËá¼°ÆäÑÜÉúÎï	"692-04-6"	710300	996200	1000000	779000	559500	1286000	1.03124404648504	0.0443857905039	0.791182604699863	0.555555555555556	0.320992787941396
Com_389_pos	N,N-Dimethylglycine	N,N-¶þ¼×»ù¸Ê°±Ëá	0.9	C4H9NO2	103.12	Amino Acid And Its Derivatives	°±»ùËá¼°ÆäÑÜÉúÎï	"1118-68-9"	1546000	2108000	2151000	1825000	1405000	1973000	1.11570247933884	0.157952359776	0.503938847216502	0.777777777777778	0.922123104906872
Com_38_neg	Nelarabine	ÄÎÀ­±õ	4.11	C11H15N5O5	297.267	Others	ÆäËü	"121032-29-9"	160300	206800	221400	210700	174800	176800	1.04659434465588	0.065702368385	0.750268088500508	0.555555555555556	0.597975435612193
Com_390_pos	Guanosine monophosphate	ÄñÜÕµ¥Á×Ëá	1.01	C10H14N5O8P	363.058	Nucleotide And Its Derivates	ºËÜÕËá¼°ÆäÑÜÉúÎï		980500	11720000	3617000	1552000	6264000	7514000	1.06441617742988	0.0900623423053	0.841215068733396	0.555555555555556	0.272479048293055
Com_391_pos	Diethylglutarate	Îì¶þËá¶þÒÒõ¥	0.67	C9H16O4	188.105	Organic Acid And Its Derivatives	ÓÐ»úËá¼°ÆäÑÜÉúÎï	"818-38-2"	11380000	17060000	15330000	13780000	15370000	14130000	1.01132162661738	0.0162418848122	0.989464105812037	0.555555555555556	0.0432705263238445
Com_392_pos	5-Hydroxyindoleacetate	5-ôÇ»ùßÅßá-3-ÒÒËá	5.58	C10H9NO3	191.058	Indole And Its Derivatives	ßÅßá¼°ÆäÑÜÉúÎï	"54-16-0"	36240	28970	29250	34470	35030	43810	0.833642220457153	-0.262499749011	0.163968699382337	0.777777777777778	0.788377741523877
Com_393_pos	D-Phenylalanine	D-±½±û°±Ëá	4.106	C9H11NO2	165.19	Amino Acid And Its Derivatives	°±»ùËá¼°ÆäÑÜÉúÎï	"673-06-3"	192800000	224200000	182500000	247900000	135000000	144300000	1.13713960546282	0.185409383294	0.490468064524111	0.666666666666667	1.01868375456124
Com_394_pos	Uridine	ÄòÜÕ	1.86	C9H12N2O6	244.2	Nucleotide And Its Derivates	ºËÜÕËá¼°ÆäÑÜÉúÎï	"58-96-8"	607600	460800	480500	484900	362000	785000	0.949139040382376	-0.0753086502365	0.97601365607079	0.555555555555556	0.170135170822205
Com_395_pos	Adenosine	ÏÙÜÕ	2.762	C10H13N5O4	267.24	Nucleotide And Its Derivates	ºËÜÕËá¼°ÆäÑÜÉúÎï	"58-61-7"	373900	8883000	5052000	1180000	8270000	4542000	1.02264865637507	0.0323105744399	0.792315628895962	0.555555555555556	0.351573463939496
Com_396_pos	Cytidine	°ûÜÕ	1.029	C9H13N3O5	243.22	Nucleotide And Its Derivates	ºËÜÕËá¼°ÆäÑÜÉúÎï	"65-46-3"	636500	495600	429500	413700	479800	364800	1.24103949773504	0.31154903189	0.2176787371099	0.888888888888889	1.13824690720877
Com_397_pos	SDMA	¶þ¼×»ù-L-¾«°±Ëá	0.913	C8H18N4O2	202.25	Amino Acid And Its Derivatives	°±»ùËá¼°ÆäÑÜÉúÎï	"30344-00-4"	405100	281000	293200	245600	255900	188000	1.42030456852792	0.506200332821	0.0851537525521332	1	1.37346971826994
Com_398_pos	Glutathione	¹Èë×¸ÊëÄ	1.51	C10H17N3O6S	307.32	Amino Acid And Its Derivatives	°±»ùËá¼°ÆäÑÜÉúÎï	"70-18-8"	58470000	68240000	47370000	45910000	47620000	60270000	1.13185955786736	0.178694958401	0.428252527979189	0.666666666666667	0.882298082222176
Com_399_pos	16alpha-Hydroxytestosterone	16¦Á-ôÇØºçÞÍª	15.01	C19H28O3	304.424	Hormones	¼¤ËØ	"63-01-4"	50340	80140	64810	53020	47700	69630	1.14640446140299	0.197116129185	0.495502179364697	0.666666666666667	0.864498374470693
Com_39_neg	N-Oleoyl Glycine	N-ÓÍõ£¸Ê°±Ëá	14.62	C20H37NO3	339.513	Organic Acid And Its Derivatives	ÓÐ»úËá¼°ÆäÑÜÉúÎï	"2601-90-3"	3649	4920	4908	2693	4901	4656	1.10016326530612	0.137717636995	0.616560007900661	0.777777777777778	0.885754078584911
Com_3_neg	Indolelactate	3-ßÅßáÈéËá	6.93	C11H11NO3	205.21	Indole And Its Derivatives	ßÅßá¼°ÆäÑÜÉúÎï	"1821-52-9"	20490	23910	15090	19630	21570	12980	1.09800664451827	0.134886784748	0.657607309085735	0.666666666666667	0.466564090964555
Com_400_pos	11beta-Hydroxytestosterone	11¦Â-ôÇØºÍª	0.68	C19H28O3	304.424	Hormones	¼¤ËØ	"1816-85-9"	1002000	957100	1037000	885600	1099000	1121000	0.964741112828439	-0.0517862461311	0.728114677004711	0.666666666666667	0.575265154172211
Com_401_pos	10E,12Z-Octadecadienoic acid	10E,12Z-Ê®°ËÌ¼¶þÏ©Ëá	14.42	C18H32O2	280.445	Fatty Acyls	Ö¬·¾õ£Àà	"2420-56-6"	3591000	2579000	2377000	3317000	2600000	2683000	0.993837209302326	-0.00891853743181	0.916860795971781	0.666666666666667	0.230659915198492
Com_402_pos	1,4-Dihydro-1-Methyl-4-Oxo-3-Pyridinecarboxamide	1,4-¶þÇâ-1-¼×»ù-4-Ñõ´ú-3-ßÁà¤¼×õ£°·	1.69	C7H8N2O2	152.151	Pyridine And Its Derivatives	ßÁà¤¼°ÆäÑÜÉúÎï	"769-49-3"	944000	1451000	945500	1501000	756900	1764000	0.830577587707303	-0.26781315226	0.655716788596076	0.666666666666667	0.580550660451299
Com_403_pos	Nandrolone	19-È¥¼×ØºÍª	9.45	C18H26O2	274.398	Hormones	¼¤ËØ	"434-22-0"	522200	645800	841200	703700	515100	549700	1.13610404297427	0.184094961084	0.525321478863194	0.666666666666667	0.768235744687123
Com_404_pos	1-(4-Methoxyphenyl)-2-propanone	1-(4-¼×Ñõ»ù±½»ù)-2-±ûÍª	1.81	C10H12O2	164.201	Benzene and substituted derivatives	±½¼°ÆäÑÜÉúÎï	"122-84-9"	919600	1318000	811000	1033000	739900	649700	1.25840006604475	0.331590651583	0.32010220711869	0.777777777777778	1.32299753493067
Com_405_pos	Lysopc 20:4	ÈÜÑªÁ×Ö¬õ£µ¨¼î20:4	12.9	C28H50NO7P	543.681	Phospholipid	Á×Ö¬		1826000	1898000	1147000	1721000	1061000	1698000	1.08727678571429	0.120719250895	0.733531313670295	0.777777777777778	0.387041450039332
Com_406_pos	cAMP	»·ÏÙÜÕËá	1.74	C10H12N5O6P	329.206	Nucleotide And Its Derivates	ºËÜÕËá¼°ÆäÑÜÉúÎï	"60-92-4"	150600	237200	163000	164600	171300	177000	1.07389354650029	0.102850988158	0.750188549084313	0.666666666666667	0.272549773090473
Com_407_pos	N-Acetyl-aspartic acid	N-ÒÒõ£-Ìì¶¬°±Ëá	1.37	C6H9NO5	175.139	Amino Acid And Its Derivatives	°±»ùËá¼°ÆäÑÜÉúÎï		399100	282600	345900	209400	295900	366500	1.17871071346639	0.237209686547	0.409280320062797	0.666666666666667	1.0959702804297
Com_408_pos	Benzamidine Hydrochloride Hydrate	±½¼×ëß	4.09	C7H11ClN2O	174.628	Benzene and substituted derivatives	±½¼°ÆäÑÜÉúÎï	"206752-36-5"	627300	727200	556600	825000	408200	425600	1.1520979020979	0.20426331823	0.497691578862052	0.666666666666667	1.06401947702688
Com_409_pos	Mag (18:1)	µ¥õ£¸ÊÓÍõ¥(õ£»ù18:1)	15.23	C21H40O4	356.2	Glycerolipids	¸ÊÓÍÖ¬Àà		12590	44440	25210	19620	18190	18370	1.46386614453542	0.549783640067	0.556496148418069	0.666666666666667	0.880898299623318
Com_40_neg	Carbamoylphosphate	°±¼×»ùõ£Á×Ëá	0.86	CH2NO5P--	139.004	Organic Acid And Its Derivatives	ÓÐ»úËá¼°ÆäÑÜÉúÎï	"590-55-6"	994800	505200	650300	480700	428900	1122000	1.05842685568025	0.0819215729888	0.768724698650886	0.666666666666667	0.420340921013086
Com_410_pos	L-beta-Imidazolelactic acid	L-¦Â-ßäßòÈéËá	0.83	C6H8N2O3	156.139	Carbohydrates And Its Derivatives	ÌÇÀà¼°ÆäÑÜÉúÎï	"14403-45-3"	1357000	1614000	1207000	1541000	1153000	1140000	1.08972352634324	0.123962155399	0.53250933600096	0.777777777777778	0.76055241679234
Com_411_pos	L-Octanoylcarnitine	ÐÁõ£Èâ¼î	7.95	C15H29NO4	287.395	Carnitine	Èâ¼îÀà	"25243-95-2"	581000	602700	470900	666400	851000	406000	0.860247478423625	-0.217176336778	0.668908926848363	0.666666666666667	0.372006588668797
Com_412_pos	Hexanoylcarnitine	¼ºõ£Èâ¼î	6.6	C13H25NO4	259.34	Carnitine	Èâ¼îÀà	"22671-29-0"	4549000	3932000	2046000	2914000	4564000	2191000	1.08873720136519	0.122655759343	0.827182534269705	0.444444444444444	0.271889316181694
Com_413_pos	D-Ala-D-Ala	D-±û°±õ£-D-±û°±Ëá	0.95	C6H12N2O3	160.171	Amino Acid And Its Derivatives	°±»ùËá¼°ÆäÑÜÉúÎï	"923-16-0"	10420000	5822000	11240000	2763000	4844000	994000	3.19520985931868	1.67591068956	0.0883579541073286	1	2.17367789464287
Com_414_pos	D-Galactosamine	2-°±»ù-2-ÍÑÑõ-D-°ëÈéÌÇ	0.71	C6H14ClNO5	215.632	Carbohydrates And Its Derivatives	ÌÇÀà¼°ÆäÑÜÉúÎï	"1772-03-8"	259200	323400	292700	319100	336600	361300	0.860668633235005	-0.216470203614	0.124436168358738	0.888888888888889	1.74820694779666
Com_415_pos	8-Bromoguanosine	8-äåÄñÜÕ	0.98	C10H12BrN5O5	362.137	Nucleotide And Its Derivates	ºËÜÕËá¼°ÆäÑÜÉúÎï	"4016-63-1"	16550	24010	29480	27110	22680	16540	1.05593245891753	0.0785175578962	0.842691321546673	0.666666666666667	0.347290067332036
Com_416_pos	Carnosine	¼¡ëÄ	0.76	C9H14N4O3	226.232	Organic Acid And Its Derivatives	ÓÐ»úËá¼°ÆäÑÜÉúÎï	"305-84-0"	143400000	197700000	141800000	176900000	135700000	118500000	1.12015773602412	0.163701900994	0.512170360718655	0.777777777777778	0.859302373845336
Com_417_pos	N-Acetyl-L-glutamic acid	N-ÒÒõ£-L-¹È°±õ£°·	0.71	C7H11NO5	189.166	Amino Acid And Its Derivatives	°±»ùËá¼°ÆäÑÜÉúÎï	"1188-37-0"	8190000	8931000	8872000	7778000	8411000	8618000	1.04780908614504	0.0673758775983	0.323582868683195	0.777777777777778	0.833005982036779
Com_418_pos	N4-Acetylcytidine	N-ÒÒõ£°ûà×à¤	4.38	C11H15N3O6	285.253	Nucleotide And Its Derivates	ºËÜÕËá¼°ÆäÑÜÉúÎï	"3768-18-1"	6776	14060	12400	12970	16300	15400	0.744034027311395	-0.426559492491	0.269275222121253	0.888888888888889	1.46726509222627
Com_419_pos	Metanephrine	¼ä¼×ÉöÉÏÏÙËØ	15.12	C10H15NO3	197.231	Phenols And Its Derivatives	·ÓÀà¼°ÆäÑÜÉúÎï	"5001-33-2"	1140000	823300	753500	1199000	703900	955200	0.950561561876771	-0.0731480307297	0.837613626626508	0.555555555555556	0.323123374455405
Com_41_neg	Butylmalonic acid	¶¡»ù±û¶þËá	0.7	C7H12O4	160.168	Organic Acid And Its Derivatives	ÓÐ»úËá¼°ÆäÑÜÉúÎï	"534-59-8"	29000000	34350000	31940000	34540000	34440000	33360000	0.931111979675591	-0.102973411735	0.269491222294897	0.888888888888889	1.48423047005786
Com_420_pos	Ethambutol	ÒÒ°·¶¡´¼	0.81	C10H24N2O2	204.31	Amines	°·Àà	"74-55-5"	29300	65020	49320	53000	77940	41990	0.830625108425374	-0.267730612177	0.529144405890002	0.666666666666667	0.664858256463995
Com_421_pos	Melamine	Èý¾ÛÇè°·	0.9	C3H6N6	126.12	Others	ÆäËü	"108-78-1"	51150	56210	37470	56490	66000	33510	0.928397435897436	-0.107185556719	0.848388510350267	0.666666666666667	0.292893997155382
Com_422_pos	Tubercidin	É±½áºË¾úËØ	2.153	C11H14N4O4	266.25	Others	ÆäËü	"69-33-0"	19740	13630	12550	16680	13270	25120	0.833847830034501	-0.262143966475	0.517768955803142	0.666666666666667	0.784060755039036
Com_423_pos	1,4-Naphthoquinone	1,4-ÝÁõ«	1.082	C10H6O2	158.153	Others	ÆäËü	"130-15-4"	1055000	1449000	1366000	1483000	1374000	1448000	0.898954703832753	-0.153679671252	0.35850642838507	0.777777777777778	1.20864866844164
Com_424_pos	S-Lactoyglutathione	S-Èéõ£¹Èë×¸ÊëÄ	2.65	C13H21N3O8S	379.386	Amino Acid And Its Derivatives	°±»ùËá¼°ÆäÑÜÉúÎï	"25138-66-3"	393700	61470	38030	177600	326700	101900	0.813592873639063	-0.297621052381	0.491615467345277	0.666666666666667	0.562715778411145
Com_425_pos	All-cis-4,7,10,13,16-docosapentaenoic acid	¶þÊ®¶þÌ¼ÎåÏ©Ëá	13.78	C22H34O2	330.504	Fatty Acyls	Ö¬·¾õ£Àà	"25182-74-5"	32590	51410	13700	32430	46580	48570	0.765794011600564	-0.384971716324	0.427431615181584	0.555555555555556	1.21600297470453
Com_426_pos	1,4-Diaminobutane	¸¯°·	0.699	C4H12N2	88.15	Polyamine	¶à°·	"110-60-1"	440900	150900	119900	245500	248700	390900	0.804089933340866	-0.314571226407	0.466839837438137	0.666666666666667	0.972371709785589
Com_427_pos	1,3-Dimethyluracil	1,3-¶þ¼×»ùëåà×à¤	4.463	C6H8N2O2	140.14	Organoheterocyclic compounds	ÓÐ»úÔÓ»·»¯ºÏÎï	"874-14-6"	20670	18730	14130	14490	22660	21200	0.917395029991431	-0.12438500328	0.67934625925402	0.777777777777778	0.297245196244342
Com_428_pos	3-Ureidopropionate	3-õ£ëå±ûËá	1.07	C4H8N2O3	132.12	Organic Acid And Its Derivatives	ÓÐ»úËá¼°ÆäÑÜÉúÎï	"462-88-4"	1378000	1446000	1365000	1468000	1543000	1384000	0.953128555176337	-0.0692572811642	0.277156813888816	0.888888888888889	1.02466617574633
Com_429_pos	5-Methyluridine	5-¼×»ùÄòÜÕ	3.706	C10H14N2O6	258.23	Nucleotide And Its Derivates	ºËÜÕËá¼°ÆäÑÜÉúÎï	"1463-10-1"	62220	37670	60140	68600	39350	49990	1.013232873243	0.0189657896002	0.952291162156351	0.444444444444444	0.194771298627137
Com_42_neg	ATP	ÈýÁ×ËáÏÙÜÕ	1.04	C10H16N5O13P3	507.181	Nucleotide And Its Derivates	ºËÜÕËá¼°ÆäÑÜÉúÎï	"56-65-5"	42710000	105700	126500	21840000	293300	299700	1.91424241073419	0.936773537567	0.877062688825357	0.666666666666667	0.297246414574459
Com_430_pos	LysoPC 18:0	ÈÜÑªÁ×Ö¬õ£µ¨¼î 18:0	13.8	C26H54NO7P	523.36	Phospholipid	Á×Ö¬		91160	137800	70950	157900	94710	141000	0.761947105002413	-0.392237246774	0.314253100692538	0.888888888888889	0.967476150780881
Com_431_pos	D-Glucosamine	D-°±»ùÆÏÌÑÌÇ	0.72	C6H13NO5	179.172	Amino Acid And Its Derivatives	°±»ùËá¼°ÆäÑÜÉúÎï	"3416-24-8"	79890	89400	82990	77870	110900	92120	0.898145181387732	-0.15497942549	0.442618308289754	0.666666666666667	0.905899370729715
Com_432_pos	Pseudouridine	¼ÙÄòÜÕ	1.46	C9H12N2O6	244.201	Nucleotide And Its Derivates	ºËÜÕËá¼°ÆäÑÜÉúÎï	"1445-07-4"	36520	46830	40970	49080	26900	24150	1.24158593828024	0.312184123327	0.357582173308482	0.666666666666667	1.24534897737992
Com_433_pos	O-Acetyl-L-carnitine	ÒÒõ£»ù-L-Èâ¼î	1.45	C9H17lNO4	203.236	Carnitine	Èâ¼îÀà	"3040-38-8"	13260000	15740000	14630000	15440000	20580000	12950000	0.89095364508883	-0.166577722332	0.547353692503448	0.555555555555556	0.561210983006746
Com_434_pos	Thymine	ÐØÏÙà×à¤	7.29	C5H6N2O2	126.113	Nucleotide And Its Derivates	ºËÜÕËá¼°ÆäÑÜÉúÎï	"65-71-4"	7302	27190	33080	1837	9870	3503	4.44260355029586	2.15140540366	0.085982456119149	0.888888888888889	1.56665483799829
Com_435_pos	XMP	5'-Á×Ëá»ÆÔ­°±Ëá	1.43	C10H11N4O9P--	362.19	Nucleotide And Its Derivates	ºËÜÕËá¼°ÆäÑÜÉúÎï	"523-98-8"	7381	12140	8822	7619	4097	14930	1.06368685731442	0.0890734930458	0.694291055641285	0.555555555555556	0.436384038370529
Com_436_pos	Tyramine	ÀÒ°·	1.98	C8H11NO	137.179	Benzene and substituted derivatives	±½¼°ÆäÑÜÉúÎï	"51-67-2"	38010	35830	18290	27110	13990	9433	1.82316506045554	0.866445181849	0.175115747863468	0.888888888888889	1.74734130237611
Com_437_pos	Dimethyl phthalate	ÁÚ±½¶þ¼×Ëá¶þ¼×õ¥	9.12	C10H10O4	194.18	Organic Acid And Its Derivatives	ÓÐ»úËá¼°ÆäÑÜÉúÎï	"131-11-3"	2617000	2536000	2586000	2632000	2762000	2434000	0.988630556974962	-0.0164965963452	0.811404914893881	0.666666666666667	0.291527418285034
Com_438_pos	Dibutyl phthalate	ÁÚ±½¶þ¼×Ëá¶þ¶¡õ¥	13.61	C16H22O4	278.34	Organic Acid And Its Derivatives	ÓÐ»úËá¼°ÆäÑÜÉúÎï	"84-74-2"	7361000	7733000	6764000	6786000	5178000	7998000	1.09498046287947	0.13090512886	0.50009315533273	0.555555555555556	0.663151487604896
Com_439_pos	Dl-Threitol	ËÕÌÇ´¼	0.69	C4H10O4	122.12	Sugar Alcohols	ÌÇ´¼	"7493-90-5"	9044000	8911000	8414000	8285000	10240000	10950000	0.89462256149279	-0.160648952749	0.337741722092501	0.666666666666667	1.03383362345325
Com_43_neg	Anthranilic acid	ÁÚ°±»ù±½¼×Ëá	1.44	C7H7NO2	137.14	Benzoic Acid And Its Derivatives	±½¼×Ëá¼°ÆäÑÜÉúÎï	"118-92-3"	39620	98020	50500	140200	51130	59680	0.749531891159715	-0.415938231472	0.565065884291203	0.777777777777778	0.731973991621758
Com_440_pos	Dl-Tropic acid	ÍÐÆ·Ëá	4.09	C9H10O3	166.174	Organic Acid And Its Derivatives	ÓÐ»úËá¼°ÆäÑÜÉúÎï	"28845-94-5"	1542000	1786000	1416000	1934000	1110000	1132000	1.1360153256705	0.183982297976	0.485693025155461	0.666666666666667	1.01336224348947
Com_441_pos	D-Myo-inositol 4-monophosohate	D-ÏËÎ¬´¼-4-Á×Ëá	0.92	C6H13O9P	260.136	Alcohols and polyols	´¼Àà¼°Æä¶àÔª´¼	"46495-39-0"	1115000	1263000	1617000	882300	12040000	6293000	0.207907240584326	-2.26598809247	0.287074884531905	0.666666666666667	1.39183155359028
Com_442_pos	Pantothenic acid	D-·ºËá	4.57	C9H17NO5	219.235	Vitamins	Î¬ÉúËØ	"79-83-4"	7800000	5206000	8397000	9697000	9066000	5478000	0.882925621880285	-0.179636185285	0.648882731506975	0.777777777777778	0.702529611189214
Com_443_pos	Ergosta-5,7,9(11),22-Tetraen-3-beta-Ol	È¥ÇâÂó½Ç¹Ì´¼	11.13	C28H42O	394.632	Hormones	¼¤ËØ	"516-85-8"	5925000	4031000	7053000	5778000	3787000	8268000	0.953793528851007	-0.0682511002933	0.936653094639522	0.555555555555556	0.124239143836928
Com_444_pos	Ergosterol	Âó½Ç¹Ì´¼	11.13	C28H44O	396.648	Hormones	¼¤ËØ	"57-87-4"	112000	70250	136300	107800	81750	154800	0.925076230579352	-0.112355839586	0.781089566900566	0.444444444444444	0.398708871878796
Com_445_pos	Ergothioneine	Âó½ÇÁòÒò	1.03	C9H15N3O2S	229.299	Organic Acid And Its Derivatives	ÓÐ»úËá¼°ÆäÑÜÉúÎï	"497-30-3"	52040	100900	73860	70560	67370	63850	1.12399643175736	0.168637455582	0.71219517882051	0.666666666666667	0.474944034763178
Com_446_pos	Dl-3-Hydroxynorvaline	DL-3-ôÇ»ùÕýçÓ°±Ëá	0.85	C5H11NO3	133.146	Amino Acid And Its Derivatives	°±»ùËá¼°ÆäÑÜÉúÎï	"2280-42-4"	5658000	7576000	9119000	5638000	5200000	7191000	1.23983582006767	0.310149090567	0.299003704044165	0.888888888888889	1.11415284423028
Com_447_pos	6-Aminohexanoate	6-°±»ù¼ºËá	2.09	C6H13NO2	131.173	Organic Acid And Its Derivatives	ÓÐ»úËá¼°ÆäÑÜÉúÎï	"60-32-2"	10760000	13610000	8322000	12440000	5155000	6355000	1.36501043841336	0.448911983665	0.310866549833255	0.777777777777778	1.06501950751622
Com_448_pos	3-Hydroxy-DL-kynurenine	3-ôÇ»ù-DL-È®ÄòËØ	9.78	C10H12N2O4	224.213	Ketones	ÍªÀà	"484-78-6"	248100	260500	251900	249000	248700	244400	1.02479450208867	0.0353346409106	0.227854469505808	0.777777777777778	1.58883536251863
Com_449_pos	Thioguanine	ÁòÄñàÑßÊ	18.3	C5H5N5S	167.192	Purines and purine derivatives	àÑßÊ¼°ÆäÑÜÉúÎï	"154-42-7"	10590	4454	7726	10680	4276	9928	0.915045812570326	-0.128084119891	0.860357112562143	0.555555555555556	0.219172585393482
Com_44_neg	Alloxan	ËÄÑõà×à¤	0.7	C4H4N2O5	160.085	Organoheterocyclic compounds	ÓÐ»úÔÓ»·»¯ºÏÎï	"2244-11-3"	69860000	84740000	80860000	80150000	82670000	79390000	0.972131621320342	-0.0407764347903	0.645745084790482	0.555555555555556	0.548682170286275
Com_450_pos	L-Carnitine	×óÐýÈâ¼î	0.87	C7H15NO3	161.2	Carnitine	Èâ¼îÀà	"541-15-1"	43250000	47390000	68660000	62150000	72510000	54990000	0.83996836277353	-0.251593104769	0.325527392328377	0.777777777777778	1.26171345151717
Com_451_pos	Inosine	¼¡ÜÕ	2.826	C10H12N4O5	268.23	Nucleotide And Its Derivates	ºËÜÕËá¼°ÆäÑÜÉúÎï	"58-63-9"	3542000	19620000	16800000	11530000	17780000	9066000	1.04132791327913	0.0584244436304	0.810036984228494	0.555555555555556	0.34185539868679
Com_452_pos	Nicotinic Acid	ÑÌËá	1.478	C6H5NO2	123.11	Vitamins	Î¬ÉúËØ	"59-67-6"	216100	647300	357500	281300	423100	308300	1.20558901945295	0.269738181991	0.784362191429193	0.555555555555556	0.394367166645926
Com_453_pos	Nicotinamide	ÑÌõ£°·	1.539	C6H6N2O	122.12	Vitamins	Î¬ÉúËØ	"98-92-0"	48800000	115700000	71880000	56450000	88770000	63580000	1.13208812260536	0.178986263026	0.794396922812282	0.555555555555556	0.382209643211869
Com_454_pos	Triethyl phosphate	Á×ËáÈýÒÒõ¥	7.89	C6H15O4P	182.155	Organic Acid And Its Derivatives	ÓÐ»úËá¼°ÆäÑÜÉúÎï	"78-40-0"	4681000	4682000	4584000	4898000	4906000	4997000	0.942301195865144	-0.0857398202651	0.00342649886845479	1	2.20795123240127
Com_455_pos	Trimethyllysine	Èý¼×»ùÀµ°±Ëá	1.03	C9H21N2O2	189.275	Amino Acid And Its Derivatives	°±»ùËá¼°ÆäÑÜÉúÎï	"66989-56-8"	729900	1194000	1147000	703400	651800	1386000	1.12027579162411	0.163853941416	0.630728918028022	0.666666666666667	0.742961885411723
Com_456_pos	Testosterone	ØºÍª	0.72	C19H28O2	288.424	Hormones	¼¤ËØ	"58-22-0"	1419000	1627000	1430000	1624000	2131000	2041000	0.772256728778468	-0.372847558581	0.0754808914524634	0.888888888888889	1.88968552890279
Com_457_pos	Styrene	±½ÒÒÏ©	10.53	C8H8	104.149	Benzene and substituted derivatives	±½¼°ÆäÑÜÉúÎï	"100-42-5"	231800	321600	193600	294900	291900	238600	0.905015749939423	-0.14398519533	0.527489957332532	0.666666666666667	0.736570819363792
Com_458_pos	1-Methylhistidine	1-¼×»ù×é°±Ëá	0.84	C7H11N3O2	169.18	Amino Acid And Its Derivatives	°±»ùËá¼°ÆäÑÜÉúÎï	"332-80-9"	8367000	7826000	8705000	7624000	10200000	5007000	1.09053479917656	0.125035807391	0.602535473918559	0.666666666666667	0.61036034110157
Com_459_pos	Furfural	¿·È©	0.87	C5H4O2	96.08	Aldehydes	È©Àà	"98-01-1"	44090	54470	74130	37950	50400	36530	1.38284753363229	0.46764210038	0.171639213771477	0.888888888888889	1.50127011924231
Com_45_neg	cis-4-Hydroxy-D-proline	Ë³Ê½-4-ôÇ»ù-D-¸¬°±Ëá	2.26	C5H9NO3	131.13	Organic Acid And Its Derivatives	ÓÐ»úËá¼°ÆäÑÜÉúÎï	"2584-71-6"	144100	221300	151400	181700	88570	99820	1.39641708773542	0.481729916143	0.245600837743615	0.777777777777778	1.30662139187526
Com_460_pos	Vidarabine	°¢ÌÇÏÙÜÕ	2.56	C10H13N5O4	267.24	Nucleotide And Its Derivates	ºËÜÕËá¼°ÆäÑÜÉúÎï	"5536-17-4"	480000	11820000	6899000	1587000	11310000	6006000	1.01565889012326	0.0224159531363	0.786418766817691	0.555555555555556	0.353253536232997
Com_461_pos	Isonicotinic acid	ÒìÑÌËá	1.49	C6H5NO2	123.11	Pyridine And Its Derivatives	ßÁà¤¼°ÆäÑÜÉúÎï	"55-22-1"	5694000	15450000	8853000	6833000	10800000	7319000	1.20218820134659	0.265662766178	0.730688182425527	0.555555555555556	0.495350075117711
Com_462_pos	2-Furoylglycine	N-(2-¿·õ£)¸Ê°±Ëá	0.79	C7H7NO4	169.13	Amino Acid And Its Derivatives	°±»ùËá¼°ÆäÑÜÉúÎï	"5657-19-2"	28680000	27680000	27530000	34480000	30890000	34350000	0.841255515443241	-0.24938403653	0.0300708440652094	1	1.54545363169091
Com_463_pos	1-Methylxanthine	1-¼×»ù»ÆàÑßÊ	4.09	C6H6N4O2	166.14	Purines and purine derivatives	àÑßÊ¼°ÆäÑÜÉúÎï	"6136-37-4"	12970	9489	30710	7579	13700	9045	1.75336367233874	0.81012526242	0.323840641448423	0.777777777777778	1.38331708930964
Com_464_pos	Picolinic acid	2-ßÁà¤¼×Ëá	1.48	C6H5NO2	123.11	Organoheterocyclic compounds	ÓÐ»úÔÓ»·»¯ºÏÎï	"98-98-6"	305900	695300	435500	339300	495000	319100	1.24562164036761	0.3168659139	0.551285751640229	0.555555555555556	0.841529620084866
Com_465_pos	Phthalate	ÁÚ±½¶þ¼×Ëá	4.07	C8H6O4	166.13	Benzoic Acid And Its Derivatives	±½¼×Ëá¼°ÆäÑÜÉúÎï	"88-99-3"	1080000	1281000	1003000	1379000	740200	800100	1.1523310382626	0.2045552295	0.469505589959701	0.666666666666667	1.05406802969234
Com_466_pos	L-allo-Threonine	L-±ðËÕ°±Ëá	0.87	C4H9NO3	119.12	Amino Acid And Its Derivatives	°±»ùËá¼°ÆäÑÜÉúÎï	"28954-12-3"	7173000	9508000	7910000	8089000	3783000	4328000	1.51796296296296	0.602136590621	0.174373763772401	0.777777777777778	1.52518063866808
Com_467_pos	L-allo-Isoleucine	L-±ðÒìÁÁ°±Ëá	2.28	C6H13NO2	131.17	Amino Acid And Its Derivatives	°±»ùËá¼°ÆäÑÜÉúÎï	"1509-34-8"	30310000	39880000	27480000	36540000	17180000	19910000	1.32649735162298	0.407621795202	0.296689124140862	0.777777777777778	1.14813232499769
Com_468_pos	Asp-glu	L-Ìì¶¬°±õ£-L-¹È°±Ëá	0.96	C9H14N2O7	262.217	Amino Acid And Its Derivatives	°±»ùËá¼°ÆäÑÜÉúÎï	"6157-06-8"	11020	12353	16850	17120	10390	12240	1.01189937106918	0.0170658275047	0.933037511073785	0.555555555555556	0.343433379004448
Com_469_pos	Asp-Phe methyl ester	°¢Ë¹°ÍÌð	5.36	C14H18N2O5	294.303	Organic Acid And Its Derivatives	ÓÐ»úËá¼°ÆäÑÜÉúÎï	"22839-47-0"	92850	112100	101600	97730	92770	126900	0.965816005040958	-0.0501797235264	0.816003996223087	0.555555555555556	0.243007750708453
Com_46_neg	cholesteryl sulfate	µ¨çÞ´¼ÁòËáÑÎ	0.94	C27H46O4S	466.717	Hormones	¼¤ËØ	"1256-86-6"	587100	1111000	632400	461900	438200	94240	2.34376571394091	1.22882836318	0.178707984873469	1	1.37955138204459
Com_470_pos	Allopurinol	±ðàÑßÊ	2.69	C5H4N4O	136.111	Nucleotide And Its Derivates	ºËÜÕËá¼°ÆäÑÜÉúÎï	"315-30-0"	3447000	20170000	16020000	11200000	16230000	7976000	1.11949951985539	0.16285390943	0.892830158441889	0.555555555555556	0.230734212966063
Com_471_pos	aminoimidazole carboxamide ribonucleotide	°±»ùßäßò¼×õ£°·ºËÌÇºËÜÕËá	16.98	C9H15N4O8P	338.211	Nucleotide And Its Derivates	ºËÜÕËá¼°ÆäÑÜÉúÎï	"68984-62-3"	346800	307300	342800	338800	372100	325900	0.961516203703704	-0.0566169244714	0.516404497946059	0.444444444444444	0.570686632718117
Com_472_pos	2'-Hydroxy-5'-methylacetophenone	2'-ôÇ»ù-5'-¼×»ù±½ÒÒÍª	8.74	C9H10O2	150.174	Benzene and substituted derivatives	±½¼°ÆäÑÜÉúÎï	"1450-72-2"	550500	312400	481700	549800	367600	516100	0.937983955354029	-0.0923648498963	0.736829105061331	0.555555555555556	0.446378482620132
Com_473_pos	2-Methylsuccinic Acid	¼×»ù¶¡¶þËá	0.94	C5H8O4	132.115	Organic Acid And Its Derivatives	ÓÐ»úËá¼°ÆäÑÜÉúÎï	"498-21-5"	35190000	37480000	37830000	35730000	37240000	34440000	1.0287682711107	0.0409180533995	0.425989687762205	0.777777777777778	0.867719338707733
Com_474_pos	Noradrenaline	È¥¼×ÉöÉÏÏÙËØ	6.36	C8H11NO3	169.178	Hormones	¼¤ËØ	"51-41-2"	20170	21450	23530	22260	16260	26600	1.00046068796069	0.000664479189253	0.911427633473716	0.555555555555556	0.140489522726251
Com_475_pos	N-carbamoyl-L-aspartate	N-°±¼×õ£-L-Ìì¶¬°±Ëá	0.9	C5H8N2O5	176.127	Amino Acid And Its Derivatives	°±»ùËá¼°ÆäÑÜÉúÎï	"13184-27-5"	91700	216300	105300	105100	110900	76670	1.4121707042061	0.49791449316	0.407467117249978	0.666666666666667	0.655038219524783
Com_476_pos	Pyridoxine	ßÁ¶ß´¼	1.563	C8H11NO3	169.178	Pyridine And Its Derivatives	ßÁà¤¼°ÆäÑÜÉúÎï	"65-23-6"	41781	19320	29490	38950	43651	44600	0.712187797265745	-0.489670378331	0.222564877835693	0.888888888888889	0.992175987374232
Com_477_pos	Dopamine HCl	ÑÎËá¶à°Í°·	1.5	C8H12ClNO2	189.64	Phenols And Its Derivatives	·ÓÀà¼°ÆäÑÜÉúÎï	"62-31-7"	437400	872300	694200	838400	868600	670500	0.842860147213459	-0.246634825119	0.428677407368138	0.555555555555556	1.15722459871167
Com_478_pos	Epinephrine bitartrate	¾ÆÊ¯ËáÉöÉÏÏÙËØ	14.86	C13H19NO9	333.29	Hormones	¼¤ËØ	"51-42-3"	236000	118200	119000	202400	129400	139300	1.00445765230312	0.00641674167187	0.913275529227465	0.666666666666667	0.193128849798003
Com_479_pos	L-Serine	Ë¿°±Ëá	0.846	C3H7NO3	105.093	Amino Acid And Its Derivatives	°±»ùËá¼°ÆäÑÜÉúÎï	"56-45-1"	3180000	2146000	2800000	2053000	1445000	3119000	1.22804896478767	0.296368085014	0.405925369746292	0.777777777777778	1.15999623030231
Com_47_neg	6-Phospho-D-glucono-1,5-lactone	6-Á×Ëá-ÆÏÌÑÌÇ-1,5-ÄÚõ¥	0.97	C6H11O9P	258.12	Sugar Acids And Its Derivatives	ÌÇËá¼°ÆäÑÜÉúÎï	"2641-81-8"	3107000	3123000	1457000	2055000	2673000	975100	1.34786344268906	0.430674338853	0.459173234760204	0.777777777777778	0.646299525236738
Com_480_pos	Hypoxanthine	´Î»ÆàÑßÊ	1.509	C5H4N4O	136.11	Nucleotide And Its Derivates	ºËÜÕËá¼°ÆäÑÜÉúÎï	"68-94-0"	43660000	81600000	67140000	69480000	62680000	62980000	0.98595879881111	-0.020400734281	0.829438206822091	0.555555555555556	0.374882859722321
Com_481_pos	L-Glutamate	L-¹È°±Ëá	0.886	C5H9NO4	147.129	Amino Acid And Its Derivatives	°±»ùËá¼°ÆäÑÜÉúÎï	"56-86-0"	85660000	67210000	68790000	79860000	58490000	78690000	1.02128639882049	0.0303874971832	0.855489703838647	0.444444444444444	0.189522002409039
Com_482_pos	D-2-Aminobutyric acid	D-2-°±»ù¶¡Ëá	0.947	C4H9NO2	103.12	Organic Acid And Its Derivatives	ÓÐ»úËá¼°ÆäÑÜÉúÎï	"2623-91-8"	15840000	16670000	19050000	17360000	15350000	15110000	1.07820995399414	0.10863813365	0.353916427618908	0.777777777777778	0.57650805665106
Com_483_pos	DL-Norvaline	D-ÕýçÓ°±Ëá	1.068	C5H11NO2	117.15	Amino Acid And Its Derivatives	°±»ùËá¼°ÆäÑÜÉúÎï	"760-78-1"	27210000	33260000	18540000	27800000	11560000	15080000	1.45132255694342	0.537368194516	0.264308178458529	0.777777777777778	1.27789882343215
Com_484_pos	Methionine	µ°°±Ëá	1.46	C5H11NO2S	149.211	Amino Acid And Its Derivatives	°±»ùËá¼°ÆäÑÜÉúÎï	"59-51-8"	5731000	10960000	9196000	6628000	3626000	4563000	1.74711480056692	0.804974408923	0.10221655386635	0.888888888888889	1.41921848350842
Com_485_pos	3-Aminoisobutyric acid	3-°±»ùÒì¶¡Ëá	0.931	C4H9NO2	103.12	Amino Acid And Its Derivatives	°±»ùËá¼°ÆäÑÜÉúÎï	"144-90-1"	71960	71200	59340	59970	43070	77190	1.12356433446152	0.168082734532	0.501199107067891	0.555555555555556	0.907874512847812
Com_486_pos	Anserine	¶ì¼¡ëÄ	0.771	C10H16N4O3	240.26	Organic Acid And Its Derivatives	ÓÐ»úËá¼°ÆäÑÜÉúÎï	"584-85-0"	285800000	294600000	282200000	328200000	296300000	326000000	0.907522356654392	-0.139994910801	0.0857435776152865	1	1.22982836084053
Com_487_pos	(S)-2-Aminobutanoate	L-¦Á-°±»ù¶¡Ëá	0.947	C4H9NO2	103.12	Amino Acid And Its Derivatives	°±»ùËá¼°ÆäÑÜÉúÎï	"1492-24-6"	14720000	15810000	17660000	16030000	14660000	14060000	1.07687150837989	0.106846118701	0.334875418547256	0.777777777777778	0.561030634856229
Com_488_pos	LysoPC 20:2	ÈÜÑªÁ×Ö¬õ£µ¨¼î 20:2	13.26	C28H54NO7P	547.36	Phospholipid	Á×Ö¬		237600	180800	133200	269700	107800	213100	0.933965458855401	-0.09855889962	0.939096002774552	0.555555555555556	0.253932665556302
Com_489_pos	1-Aminocyclopropane-1-carboxylic acid	1-°±»ù»·±ûÍéôÈËá	0.89	C4H7NO2	101.048	Amino Acid And Its Derivatives	°±»ùËá¼°ÆäÑÜÉúÎï	"22059-21-8"	1810000	1723000	1730000	1584000	1170000	1355000	1.28084692139207	0.357098064325	0.0959145039766043	1	1.57164233178765
Com_48_neg	6-Phospho-D-gluconate	6-Á×ËáÆÏÌÑÌÇËá	0.98	C6H13O10P	276.135	Sugar Acids And Its Derivatives	ÌÇËá¼°ÆäÑÜÉúÎï	"921-62-0"	1065000	1089000	780700	871800	682000	1441000	0.979931881928676	-0.0292466283322	0.944948714592114	0.555555555555556	0.141822995785089
Com_490_pos	Levodopa	×óÐý¶à°Í	1.019	C9H11NO4	197.19	Amino Acid And Its Derivatives	°±»ùËá¼°ÆäÑÜÉúÎï	"59-92-7"	16160000	21650000	15950000	19530000	14860000	13280000	1.12775330396476	0.173451512709	0.462959763387372	0.777777777777778	0.874724521184324
Com_491_pos	Betaine	Ìð²Ë¼î	0.907	C5H11NO2	117.15	Organic Acid And Its Derivatives	ÓÐ»úËá¼°ÆäÑÜÉúÎï	"107-43-7"	30190000	40370000	43410000	35350000	26410000	50350000	1.01659084827402	0.0237391482843	0.866623939566679	0.555555555555556	0.225475552096784
Com_492_pos	Choline Hydroxide	µ¨¼î	0.828	C5H15NO2	121.18	Cholines	µ¨¼îÀà	"123-41-1"	5892000	8510000	7706000	6692000	3852000	6947000	1.26396432450975	0.337955743911	0.32351523939929	0.777777777777778	0.720840081885791
Com_493_pos	Trimethylamine N-oxide	Èý¼×°·N-Ñõ»¯Îï	0.872	C3H9NO	75.11	Polyamine	¶à°·	"1184-78-7"	61170	120900	108400	77760	159800	185300	0.686917655961784	-0.541790928094	0.364132402882192	0.777777777777778	1.13103351069773
Com_494_pos	S-Adenosyl-L-methionine	S-ÏÙÜÕµ°°±Ëá	0.8	C15H22N6O5S	398.44	Amino Acid And Its Derivatives	°±»ùËá¼°ÆäÑÜÉúÎï	"29908-03-0"	85940	142100	72610	89210	125200	102300	0.949291149632156	-0.0750774621085	0.732327972957593	0.666666666666667	0.501237252667744
Com_495_pos	Pipecolic acid	ßßà¤¼×Ëá	1.042	C6H11NO2	129.16	Organic Acid And Its Derivatives	ÓÐ»úËá¼°ÆäÑÜÉúÎï	"535-75-1"	23220000	23900000	28860000	24830000	19250000	23790000	1.11949314866657	0.162845698878	0.335577381549779	0.666666666666667	0.73036251401968
Com_496_pos	Azelaic acid	ÈÉ¶þËá	7.433	C9H16O4	188.22	Fatty Acyls	Ö¬·¾õ£Àà	"123-99-9"	80230	75340	61920	77360	80340	80450	0.913247952970817	-0.130921480072	0.340997149647119	0.888888888888889	1.08274296937067
Com_497_pos	gamma-Glutamylglutamic acid	¦Ã-¹È°±õ£¹È°±Ëá	1.05	C10H16N2O7	276.243	Amino Acid And Its Derivatives	°±»ùËá¼°ÆäÑÜÉúÎï	"1116-22-9"	66830	56560	57340	31450	45680	83050	1.12829317018354	0.174141979276	0.556617278078642	0.666666666666667	0.715854814622121
Com_498_pos	beta-Nicotinamide adenine dinucleotide phosphate	ÑÌõ£°·ÏÙàÑßÊ¶þºËÜÕËáÁ×Ëá	1.03	C21H29N7O17P3	744.41	Nucleotide And Its Derivates	ºËÜÕËá¼°ÆäÑÜÉúÎï	"53-59-8"	246500	116300	88470	338500	73810	181600	0.759828930309306	-0.396253451561	0.738848407481734	0.555555555555556	0.569531918517794
Com_499_pos	L-Pipecolate	L-ßßà¤Ëá	1.049	C6H11NO2	129.16	Amino Acid And Its Derivatives	°±»ùËá¼°ÆäÑÜÉúÎï	"3105-95-1"	1141000	1119000	1352000	1262000	951700	1186000	1.06244668647234	0.0873904486934	0.576959302241673	0.444444444444444	0.468466541514154
Com_49_neg	Acetyl phosphate	ÒÒõ£Á×Ëá	0.9	C2H5O5P	140.032	Organic Acid And Its Derivatives	ÓÐ»úËá¼°ÆäÑÜÉúÎï	"590-54-5"	3904000	5223000	2640000	2568000	3466000	1289000	1.60685511402431	0.684239850791	0.227956572444531	0.888888888888889	1.40753793179995
Com_4_neg	Decanoic acid	Õý¹ïËá	2.16	C10H20O2	172.265	Fatty Acyls	Ö¬·¾õ£Àà	"334-48-5"	3371000	3554000	674100	2251000	2843000	2092000	1.05748677984971	0.0806396276341	0.788127776067978	0.666666666666667	0.361444234416981
Com_500_pos	gamma-Nonanolactone	¦Ã-ÈÉÄÚõ¥	4.1	C9H16O2	156.222	Esters	õ¥Àà	"104-61-0"	250800	272100	233100	304000	159800	189600	1.15702479338843	0.21041977967	0.445388397600137	0.666666666666667	1.050056139461
Com_501_pos	UDP-N-acetylglucosamine	Äòà×à¤¶þÁ×Ëá-N-ÒÒõ£ÆÏÌÇ°·	0.99	C17H27N3O17P2	607.354	Nucleotide And Its Derivates	ºËÜÕËá¼°ÆäÑÜÉúÎï	"528-04-1"	95900	45600	39110	86240	41500	77430	0.880294390018034	-0.183942021144	0.67785859323839	0.555555555555556	0.472678443368416
Com_502_pos	Choline Chloride	ÂÈ»¯µ¨¼î	0.83	C5H14ClNO	139.62	Cholines	µ¨¼îÀà	"67-48-1"	2863000	4459000	3946000	3557000	2213000	3577000	1.20552048785707	0.269656169795	0.403242116589563	0.777777777777778	0.567637809401886
Com_503_pos	1-Methylguanine	1-¼×»ùÄñàÑßÊ	4.03	C6H7N5O	165.153	Nucleotide And Its Derivates	ºËÜÕËá¼°ÆäÑÜÉúÎï	"938-85-2"	61830	73000	69120	85030	65330	61720	0.961665409279517	-0.0563930681874	0.794192178865752	0.555555555555556	0.615610830725168
Com_504_pos	Serotonin	5-ôÇ»ùÉ«°·	2.94	C10H12N2O	176.215	Indole And Its Derivatives	ßÅßá¼°ÆäÑÜÉúÎï	"50-67-9"	49280	59110	19150	32050	51200	46910	0.979870928088507	-0.0293363698129	0.796960848813996	0.555555555555556	0.33767827055126
Com_505_pos	1-Palmitoyl-Sn-Glycero-3-Phosphocholine	1-Ê®Áùõ£-SN-±ûÈý´¼-Á×Ëáµ¨¼î	12.52	C24H50NO7P	495.63	Phospholipid	Á×Ö¬	"17364-16-8"	1002000	1052000	443600	1005000	478400	1076000	0.975853715714621	-0.0352631965156	0.933959704772804	0.666666666666667	0.224857697220813
Com_506_pos	1-Stearoyl-Sn-Glycerol-3-Phosphocholine	1-Ó²Ö¬õ£-SN-¸ÊÓÍ-3-Á×õ£µ¨¼î	13.78	C26H54NO7P	523.683	Phospholipid	Á×Ö¬	"19420-57-6"	64880	117700	66080	92600	58510	88170	1.03920093614176	0.0554746355197	0.944155346457843	0.444444444444444	0.180386629076123
Com_507_pos	2-(3,4-dimethoxyphenyl)ethanamine	2-(3,4-¶þ¼×Ñõ»ù±½»ù)ÒÒ°·	1.81	C10H15NO2	181.232	Benzene and substituted derivatives	±½¼°ÆäÑÜÉúÎï	"120-20-7"	10120000	13350000	7786000	12000000	5397000	6208000	1.32412624443974	0.405040677692	0.34345364572122	0.777777777777778	1.3614623293527
Com_508_pos	2-(Dimethylamino)Guanosine	¶þ¼×»ùÄñÜÕ	4.57	C12H17N5O5	311.294	Nucleotide And Its Derivates	ºËÜÕËá¼°ÆäÑÜÉúÎï	"2140-67-2"	225800	274400	257100	315500	207500	209300	1.03413901406527	0.0484301328697	0.761858752111039	0.666666666666667	0.771683431050276
Com_509_pos	1-Methylguanosine	1-¼×»ùÄñÜÕ	4.04	C11H15N5O5	297.267	Nucleotide And Its Derivates	ºËÜÕËá¼°ÆäÑÜÉúÎï	"2140-65-0"	253100	319900	358300	406600	239200	251100	1.03835433158658	0.0542988379081	0.789096006720308	0.666666666666667	0.690644506169739
Com_50_neg	ADP-ribose	ADPºËÌÇ	1.05	C15H23N5O14P2	591.315	Nucleotide And Its Derivates	ºËÜÕËá¼°ÆäÑÜÉúÎï	"20762-30-5"	24290000	42480000	40310000	38600000	55980000	32470000	0.842817788272334	-0.2467073313	0.508283424350502	0.444444444444444	0.881851333852372
Com_510_pos	1-Methylnicotinamide	1-¼×»ùÑÌõ£°·	2.68	C7H9N2O+	137.159	Pyridine And Its Derivatives	ßÁà¤¼°ÆäÑÜÉúÎï	"3106-60-3"	1211000	6205000	5564000	3706000	5816000	2637000	1.06752200016449	0.0942658021185	0.871088760668144	0.555555555555556	0.246863241893976
Com_511_pos	1-Methyluric acid	1-¼×»ùÄòËá	7.86	C6H6N4O3	182.137	Organic Acid And Its Derivatives	ÓÐ»úËá¼°ÆäÑÜÉúÎï	"708-79-2"	1650000	1658000	1592000	1694000	1643000	1611000	0.990299110751819	-0.0140637510864	0.64441550080046	0.444444444444444	0.524661484825917
Com_512_pos	1-Oleoyl-Sn-Glycero-3-Phosphocholine	ÓÍõ£Á×Ëáµ¨¼î	12.82	C26H52NO7P	521.667	Phospholipid	Á×Ö¬	"19420-56-5"	8287000	8645000	4887000	7494000	4451000	7469000	1.12387967446173	0.16848758507	0.676352199578821	0.777777777777778	0.499027222675051
Com_513_pos	L-Hydroxylysine	5-ôÇ»ù-L-Àµ°±Ëá	0.9	C6H14N2O3	163.195	Amino Acid And Its Derivatives	°±»ùËá¼°ÆäÑÜÉúÎï	"1190-94-9"	43470	42990	55020	36900	57520	41760	1.03891907769129	0.0550832858494	0.768418063772642	0.666666666666667	0.386479214102694
Com_514_pos	DL-Leucine	DL-ÁÁ°±Ëá	2.3	C6H13NO2	131.173	Amino Acid And Its Derivatives	°±»ùËá¼°ÆäÑÜÉúÎï	"328-39-2"	2339000	3258000	2140000	2772000	1290000	1504000	1.3900467121811	0.475133365179	0.25642992240119	0.777777777777778	1.21466321263372
Com_515_pos	Dl-Indole-3-lactic acid	DL-ßÅßá-3-ÈéËá	4.87	C11H11NO3	205.21	Organic Acid And Its Derivatives	ÓÐ»úËá¼°ÆäÑÜÉúÎï	"832-97-3"	19800000	23200000	16510000	19370000	12000000	13080000	1.33880764904387	0.420948698747	0.170984503924175	0.888888888888889	1.60755262714034
Com_516_pos	Dl-Norleucine	DL-ÕýÁÁ°±Ëá	0.9	C6H13NO2	131.173	Amino Acid And Its Derivatives	°±»ùËá¼°ÆäÑÜÉúÎï	"616-06-8"	25820000	36640000	41260000	33900000	23380000	45360000	1.01052221356196	0.0151010357636	0.914257602057382	0.555555555555556	0.182118784660771
Com_517_pos	N-acetyl-glutamate	N-ÒÒõ£-¹È°±Ëá	1.67	C7H11NO5	189.166	Amino Acid And Its Derivatives	°±»ùËá¼°ÆäÑÜÉúÎï		214600	258400	234000	202800	470900	233700	0.779149217544633	-0.360028444654	0.561891789464999	0.555555555555556	0.486608074252603
Com_518_pos	N-Acetylglycine	N-ÒÒõ£»ù¸Ê°±Ëá	0.9	C4H7NO3	117.103	Amino Acid And Its Derivatives	°±»ùËá¼°ÆäÑÜÉúÎï	"543-24-8"	31430000	42320000	39210000	31840000	22320000	48470000	1.10065283055637	0.138359483782	0.611987206053939	0.555555555555556	0.708509464040922
Com_519_pos	N-Acetylhistamine	ÒÒõ£»ù×é°·	2.73	C7H11N3O	153.182	Amino Acid And Its Derivatives	°±»ùËá¼°ÆäÑÜÉúÎï	"673-49-4"	28640	142600	157100	96390	145900	64520	1.07017372315114	0.097845010818	0.860873201772216	0.555555555555556	0.25834508649691
Com_51_neg	Ala-trp	L-±û°±õ£-L-É«°±Ëá	5.46	C14H17N3O3	275.303	Amino Acid And Its Derivatives	°±»ùËá¼°ÆäÑÜÉúÎï	"16305-75-2"	321200	284500	367400	163300	211400	69610	2.19013751659877	1.13102145809	0.113976177638197	1	2.21114087361369
Com_520_pos	N-Acetylthreonine	N-ÒÒõ£»ùËÕ°±Ëá	1.74	C6H11NO4	161.156	Amino Acid And Its Derivatives	°±»ùËá¼°ÆäÑÜÉúÎï	"17093-74-2"	131800	159000	120500	149800	141600	170400	0.890645300996102	-0.167077101274	0.299884940810771	0.777777777777778	0.76087623651066
Com_521_pos	Feruloyl Putrescine	°¢Îºõ£¸¯°·	15.1	C14H20N2O3	264.32	Phenolamides	·Ó°·	"501-13-3"	1638000	989400	988200	1445000	1177000	1307000	0.920234156273861	-0.11992708903	0.591441470959561	0.666666666666667	0.661996195257057
Com_522_pos	L-Lysinamide	Àµ°±õ£°·	4.91	C6H15N3O	145.2	Amino Acid And Its Derivatives	°±»ùËá¼°ÆäÑÜÉúÎï	"32388-19-5"	1274000	1432000	929700	1176000	742700	847300	1.3144251626898	0.394432003888	0.215411981034755	0.888888888888889	1.5172720216181
Com_523_pos	Phosphoethanolamine	Á×ËáÒÒ´¼°·	0.86	C2H8NO4P	141.063	Organic Acid And Its Derivatives	ÓÐ»úËá¼°ÆäÑÜÉúÎï	"1071-23-4"	807000	549000	545900	687300	497600	1260000	0.777905026790462	-0.362334065309	0.570551042302518	0.555555555555556	0.805468914692732
Com_524_pos	Calcium phosphorylcholine chloride	ÂÈ»¯Á×õ£µ¨¼î¸ÆÑÎ	0.87	C5H13NO4P.Ca.Cl	257.666	Cholines	µ¨¼îÀà	"4826-71-5"	10150000	15120000	12490000	15620000	8002000	26840000	0.748285838849035	-0.418338622211	0.654905282613176	0.666666666666667	0.69307996570894
Com_525_pos	Pyridoxine O-Glucoside	ßÁ¶ß´¼ÆÏÌÑÌÇÜÕ	0.99	C14H21NO8	331.127	Pyridine And Its Derivatives	ßÁà¤¼°ÆäÑÜÉúÎï		363800	692200	402700	361000	225100	473700	1.37639177203246	0.46089117289	0.335827298498578	0.777777777777778	1.17256627637288
Com_526_pos	Cyprodinil	à×¾ú»·°·	9.02	C14H15N3	225.289	Benzene and substituted derivatives	±½¼°ÆäÑÜÉúÎï	"121552-61-2"	272900	275100	262300	273500	276200	289700	0.965332380271623	-0.0509023226558	0.204529005237038	0.888888888888889	0.750528803672728
Com_527_pos	N-Methyl-a-aminoisobutyric acid	N-¼×»ù-¦Á-°±»ùÒì¶¡Ëá	1.22	C5H11NO2	117.146	Organic Acid And Its Derivatives	ÓÐ»úËá¼°ÆäÑÜÉúÎï	"2566-34-9"	23470000	28060000	16620000	23880000	10120000	13000000	1.45	0.53605290024	0.24915710267681	0.777777777777778	1.32807190258058
Com_528_pos	Niflumic Acid	·úÄáËá	15.12	C13H9F3N2O2	282.218	Others	ÆäËü	"4394-00-7"	6323000	4295000	4221000	5763000	4319000	4527000	1.01574371962489	0.0225364443681	0.973278399397434	0.666666666666667	0.1732104690981
Com_529_pos	N¦Å-(1-Carboxymethyl)-L-lysine	N¦Å-(1-ôÈ¼×»ù)-L-Àµ°±Ëá	0.84	C8H16N2O4	204.224	Amino Acid And Its Derivatives	°±»ùËá¼°ÆäÑÜÉúÎï	"5746-04-3"	392500	105100	186100	190300	157800	123600	1.44943820224719	0.535493824457	0.597883712921509	0.555555555555556	0.698411711806727
Com_52_neg	N-Acetylglucosamine 1-phosphate	N-ÒÒõ£ÆÏÌÑÌÇ°· 1-Á×Ëá	0.91	C8H16NO9P	301.1	Carbohydrates And Its Derivatives	ÌÇÀà¼°ÆäÑÜÉúÎï		265300	245300	215300	212100	225200	373000	0.895841046525978	-0.158685324359	0.706198509913212	0.555555555555556	0.369872574556493
Com_530_pos	Oxymetazoline	ôÇ¼×ßòßø	5.06	C16H24N2O	260.375	Benzene and substituted derivatives	±½¼°ÆäÑÜÉúÎï	"1491-59-4"	508500	622500	585600	597500	534300	592400	0.995592158682287	-0.00637322723889	0.929335141968836	0.555555555555556	0.378141971579652
Com_531_pos	N¦Å,N¦Å,N¦Å-trimethyllysine	N¦Å,N¦Å,N¦Å-Èý¼×»ùÀµ°±Ëá	0.76	C9H20N2O2	188.267	Amino Acid And Its Derivatives	°±»ùËá¼°ÆäÑÜÉúÎï	"19253-88-4"	11870000	14270000	13770000	12730000	13600000	13180000	1.01012401923564	0.0145324325336	0.911598717891293	0.666666666666667	0.104125783297443
Com_532_pos	19-Norethisterone	È²ÅµÍª	15.11	C20H26O2	298.419	Others	ÆäËü	"68-22-4"	65730	44190	61050	58220	33150	66240	1.08476619503839	0.11738412506	0.684732503649819	0.555555555555556	0.508115711321743
Com_533_pos	N-Methyl-L-arginine hydrochloride	N'-µ¥¼×»ù-L-¾«°±ËáÑÎËáÑÎ	0.95	C7H16N4O2	188.23	Amino Acid And Its Derivatives	°±»ùËá¼°ÆäÑÜÉúÎï	"156706-47-7"	106800	130500	146300	115400	53090	90390	1.48176761433869	0.567319207476	0.189602415263929	0.888888888888889	1.63651058573906
Com_534_pos	N-Tetradecanamide	N-ÕýÊ®ËÄÍé»ùï§	13.59	C14H29NO	227.386	Fatty Acyls	Ö¬·¾õ£Àà	"638-58-4"	818500	702800	629100	768300	693100	718600	0.986422018348624	-0.0197230917729	0.837141927107109	0.555555555555556	0.255199981157797
Com_535_pos	5,6-Dihydro-5-methyluracil	5,6-¶þÇâÐØÏÙà×à¤	0.69	C5H8N2O2	128.13	Pyrimidines and pyrimidine derivatives	à×à¤¼°ÆäÑÜÉúÎï	"696-04-8"	1704000	803800	1329000	592300	1052000	1213000	1.34280614566199	0.42525104499	0.399786504225212	0.777777777777778	1.30678841939368
Com_536_pos	N-Methylnicotinamine	N-¼×»ùÑÌõ£°·	1.82	C7H8N2O	136.15	Pyridine And Its Derivatives	ßÁà¤¼°ÆäÑÜÉúÎï	"114-33-0"	17650	27150	17360	13010	15990	11660	1.52877520905066	0.612376288563	0.0886007339264107	1	1.57013822162547
Com_537_pos	Trigonelline	ºùÂ«°Í¼î	0.94	C7H7NO2	137.14	Alkaloids and derivatives	ÉúÎï¼î¼°ÆäÑÜÉúÎï	"535-83-1"	515500	429400	540800	654400	627800	673400	0.759715688279812	-0.396468481397	0.0485863447528354	1	1.57815129321709
Com_538_pos	2-Piperidinone	2-ßßà¤Íª	4.15	C5H9NO	99.132	Organoheterocyclic compounds	ÓÐ»úÔÓ»·»¯ºÏÎï	"675-20-7"	204200	124200	123100	112300	213700	192800	0.870277563608327	-0.200452491883	0.641719606051647	0.555555555555556	0.496090607442487
Com_539_pos	Phloretate	¶ÔôÇ»ù±½±ûËá	4.05	C9H10O3	166.177	Fatty Acyls	Ö¬·¾õ£Àà	"501-97-3"	8211000	9676000	7766000	10720000	5724000	5980000	1.1439975026757	0.194083902745	0.487840288157432	0.666666666666667	1.02610028759183
Com_53_neg	2-C-Methyl-D-erythritol 2,4-cyclodiphosphate	2-C-¼×»ù-D-³àÞºÌÇ´¼-2,4-»·¶þÁ×Ëáõ¥	0.89	C5H12O9P2	278.09	Organic oxygen compounds	ÓÐ»úÑõ»¯ºÏÎï	"143488-44-2"	767500	733700	1140000	981800	636600	919200	1.04082597730139	0.0577288749087	0.858296855804493	0.444444444444444	0.298287829532385
Com_540_pos	Alpha-Linolenic acid	¦Á-ÑÇÂéËá	12.64	C18H30O2	278.435	Eicosanoid	Ñõ»¯Ö¬ÖÊ	"463-40-1"	123300	140400	57630	85560	80670	134400	1.06885540365233	0.0960666963292	0.944263791380586	0.555555555555556	0.11300886365715
Com_541_pos	3-Methylindole	3-¼×»ùßÅßá	4.87	C9H9N	131.177	Indole And Its Derivatives	ßÅßá¼°ÆäÑÜÉúÎï	"83-34-1"	217900	214400	173900	183600	119900	143800	1.35524256651017	0.43855109378	0.109312019048852	0.888888888888889	1.943084997803
Com_542_pos	isoleucine	ÒìÁÁ°±Ëá	2.11	C6H13NO2	131.17	Amino Acid And Its Derivatives	°±»ùËá¼°ÆäÑÜÉúÎï	"73-32-5"	125700000	163500000	112500000	150000000	71240000	82620000	1.32199039031133	0.40271168978	0.297125661418651	0.777777777777778	1.13633087799451
Com_543_pos	Creatinine	¼¡Ëáôû	0.898	C4H7N3O	113.12	Organic Acid And Its Derivatives	ÓÐ»úËá¼°ÆäÑÜÉúÎï	"60-27-5"	2452000	2161000	2196000	2372000	2431000	2400000	0.945300569207275	-0.0811549711	0.281203479659698	0.666666666666667	1.51225052504003
Com_544_pos	L-Citrulline	L-¹Ï°±Ëá	0.89	C6H13N3O3	175.19	Amino Acid And Its Derivatives	°±»ùËá¼°ÆäÑÜÉúÎï	"372-75-8"	292900	319800	361700	335600	296100	226100	1.13592912100723	0.183872817271	0.374107597673487	0.666666666666667	0.899659323389797
Com_545_pos	L-Leucine	L-ÁÁ°±Ëá	2.32	C6H13NO2	131.17	Amino Acid And Its Derivatives	°±»ùËá¼°ÆäÑÜÉúÎï	"61-90-5"	68670000	92410000	62720000	82910000	38920000	44940000	1.34196797985249	0.424350248394	0.286925334770016	0.777777777777778	1.16624531788589
Com_546_pos	Urocanic acid	Äò¿¯Ëá	1.04	C6H6N2O2	138.12	Organic Acid And Its Derivatives	ÓÐ»úËá¼°ÆäÑÜÉúÎï	"104-98-3"	72510	110500	97940	99630	99060	89480	0.974945344761773	-0.0366067509495	0.787210983688722	0.555555555555556	0.208608918613186
Com_547_pos	D-Glutamine	D-¹È°±õ£°·	0.86	C5H10N2O3	146.14	Amino Acid And Its Derivatives	°±»ùËá¼°ÆäÑÜÉúÎï	"5959-95-5"	68840000	81540000	97990000	79620000	64030000	78890000	1.11606902129954	0.15842625083	0.453708339945303	0.777777777777778	0.709256989384135
Com_548_pos	L-Ornithine	Äñ°±Ëá	0.762	C5H12N2O2	132.16	Amino Acid And Its Derivatives	°±»ùËá¼°ÆäÑÜÉúÎï	"70-26-8"	538400	553600	767300	559400	495500	514300	1.18487127198573	0.244730328865	0.298535259822521	0.777777777777778	0.9907931710039
Com_549_pos	LysoPE 18:2	ÈÜÑªÁ×Ö¬õ£ÒÒ´¼°· 18:2	12.08	C23H44NO7P	477.6	Phospholipid	Á×Ö¬		28910	31550	14800	20650	14230	23840	1.2816757493188	0.358031321225	0.49152392020732	0.777777777777778	0.861696153793644
Com_54_neg	Allolithocholic acid	±ðÊ¯µ¨Ëá	11.18	C24H40O3	376.579	Bile Acids	µ¨Ö­Ëá	"2276-93-9"	2178000	1548000	2776000	2303000	1557000	3481000	0.885710393679335	-0.17509304611	0.756764242934257	0.666666666666667	0.414110734160917
Com_550_pos	LysoPC 10:0	ÈÜÑªÁ×Ö¬õ£µ¨¼î (1-õ£»ù10:0)	6.25	C18H38NO7P	411.3	Phospholipid	Á×Ö¬		8166	10040	27750	7766	7192	8476	1.96108218827345	0.971649999645	0.299839795157483	0.888888888888889	1.4285392316512
Com_551_pos	2-Hydroxy-6-Aminopurine	2-ôÇ»ù-6-°±»ùàÑßÊ	2.76	C5H5N5O	151.126	Nucleotide And Its Derivates	ºËÜÕËá¼°ÆäÑÜÉúÎï	"3373-53-3"	124300	444100	210700	758400	196700	416900	0.567857142857143	-0.816400061661	0.357312770063659	0.666666666666667	1.26339694138679
Com_552_pos	N-Acetyl-Dl-glutamic acid	N-ÒÒõ£-DL-¹È°±Ëá	1.84	C7H11NO5	189.166	Amino Acid And Its Derivatives	°±»ùËá¼°ÆäÑÜÉúÎï	"5817-08-3"	423400	486100	402300	444300	795400	382500	0.808654913081001	-0.306403919302	0.544319918748746	0.555555555555556	0.435854446005105
Com_553_pos	N6-Succinyl Adenosine	N6-çúçêõ£ÏÙÜÕ	4.54	C14H17N5O8	383.313	Nucleotide And Its Derivates	ºËÜÕËá¼°ÆäÑÜÉúÎï	"4542-23-8"	118500	251300	117700	85680	206100	204500	0.982308374304828	-0.0257520965783	0.980643705208711	0.444444444444444	0.37521863823698
Com_554_pos	N-Acetyl-L-histidine	N-ÒÒõ£-L-×é°±Ëá	1.0	C8H11N3O3	197.191	Amino Acid And Its Derivatives	°±»ùËá¼°ÆäÑÜÉúÎï	"2497-02-1"	48010000	61410000	43760000	54770000	44800000	38830000	1.10679190751445	0.146384000604	0.516098869138118	0.666666666666667	0.790379590549544
Com_555_pos	2-Phenylglycine	DL-±½¸Ê°±Ëá	2.78	C8H9NO2	151.163	Amino Acid And Its Derivatives	°±»ùËá¼°ÆäÑÜÉúÎï	"2835-06-5"	112200	452400	198300	690300	176200	373300	0.615341184061945	-0.700541541234	0.424687415533206	0.666666666666667	1.10751460566278
Com_556_pos	O-Acetyl-L-homoserine	O-ÒÒõ£»ù-L-¸ßË¿°±Ëá	1.0	C6H11NO4	161.16	Amino Acid And Its Derivatives	°±»ùËá¼°ÆäÑÜÉúÎï		13290000	14730000	21900000	19520000	21020000	17670000	0.857584607455764	-0.221649083386	0.371074725163528	0.666666666666667	1.12381367751801
Com_557_pos	NG,NG-Dimethyl-L-arginine	N,N-¶þ¼×»ù¾«°±Ëá	0.93	C8H20Cl2N4O2	202.254	Amino Acid And Its Derivatives	°±»ùËá¼°ÆäÑÜÉúÎï	"220805-22-1"	184400	99380	146000	98860	166000	114200	1.13380467472168	0.181172122571	0.643899412521505	0.666666666666667	0.519598600768935
Com_558_pos	Cytarabine	°¢ÌÇ°ûÜÕ	1.0	C9H13N3O5	243.22	Nucleotide And Its Derivates	ºËÜÕËá¼°ÆäÑÜÉúÎï	"147-94-4"	671100	737900	373000	518800	383300	668800	1.13438156470813	0.181905992062	0.704489949788265	0.666666666666667	0.343445671695729
Com_559_pos	Cuminaldehyde	¿ÝÜøÈ©	4.06	C10H12O	148.2	Prenol lipids	Ï©´¼õ¥	"122-03-2"	200000	203400	192200	249300	167200	169200	1.01690285128906	0.0241818594726	0.81864339098544	0.666666666666667	0.548955780387018
Com_55_neg	Isolithocholic acid	ÒìÊ¯µ¨Ëá	13.06	C24H40O3	376.579	Bile Acids	µ¨Ö­Ëá	"1534-35-6"	9082	29040	8205	13530	11580	9143	1.35249467199953	0.435622910729	0.771250435455208	0.666666666666667	0.493344497712425
Com_560_pos	Cytidine-5-Triphosphate	°ûÜÕ-5-ÈýÁ×Ëá	1.79	C9H16N3O14P3	483.16	Nucleotide And Its Derivates	ºËÜÕËá¼°ÆäÑÜÉúÎï	"36051-68-0"	5607	11480	10079	2768	4407	2350	2.85207349081365	1.51201115691	0.0239823689408152	1	2.20472157513047
Com_561_pos	2-Deoxy-D-galactose	2-ÍÑÑõ-D-°ëÈéÌÇ	0.69	C6H12O5	164.156	Carbohydrates And Its Derivatives	ÌÇÀà¼°ÆäÑÜÉúÎï	"1949-89-9"	2509000	3520000	3193000	2450000	2844000	2910000	1.12408581179912	0.168752173932	0.405268290880661	0.777777777777778	1.00927928189651
Com_562_pos	dAMP	2'-ÍÑÑõÏÙÜÕ-5'-µ¥Á×Ëá	1.47	C10H14N5O6P	331.222	Nucleotide And Its Derivates	ºËÜÕËá¼°ÆäÑÜÉúÎï	"653-63-4"	3893000	3756000	3010000	3917000	3202000	4333000	0.93075445337059	-0.103527480947	0.589481393062927	0.777777777777778	0.473287399751851
Com_563_pos	2-Methylbutyroylcarnitine	2-¼×»ù¶¡õ£Èâ¶¾¼î	5.45	C12H23NO4	245.315	Fatty Acyls	Ö¬·¾õ£Àà	"31023-25-3"	1810000	2984000	2861000	1489000	3060000	1823000	1.20134965473949	0.264656110862	0.485854360056509	0.555555555555556	0.884802768298082
Com_564_pos	2'-Deoxyguanosine-5'-monophosphate	2-ÍÑÑõÄñÜÕ-5-µ¥Á×Ëá	1.66	C10H14N5O7P	347.221	Nucleotide And Its Derivates	ºËÜÕËá¼°ÆäÑÜÉúÎï	"312693-67-7"	4003	10280	5064	8258	9656	10950	0.670281319290466	-0.577161368327	0.229145110616929	0.777777777777778	1.35178388742271
Com_565_pos	L-2-Aminoadipic acid	°±»ù¼º¶þËá	0.91	C6H11NO4	161.156	Organic Acid And Its Derivatives	ÓÐ»úËá¼°ÆäÑÜÉúÎï	"542-32-5"	428600	608000	517900	1015000	202500	569800	0.869747664074302	-0.201331195757	0.930178105224059	0.555555555555556	0.490969313349395
Com_566_pos	22(S)-Hydroxycholesterol	22(S)-ôÇ»ùµ¨¹Ì´¼	0.98	C27H46O2	402.653	Bile Acids	µ¨Ö­Ëá	"22348-64-7"	12540	8080	5606	19610	22620	15170	0.456898954703833	-1.13005295294	0.0519322258526776	1	2.33681221732131
Com_567_pos	2-Aminooctanoic acid	2-°±»ùÐÁËá	1.03	C8H17NO2	159.226	Organic Acid And Its Derivatives	ÓÐ»úËá¼°ÆäÑÜÉúÎï	"2187-07-7"	339900	351000	501100	434600	281900	450300	1.02159753171066	0.0308269444513	0.897761286726848	0.444444444444444	0.253673043512042
Com_568_pos	Hypotaurine	2-°±»ùÒÒÍéÑÇ»ÇËá	0.94	C2H7NO2S	109.147	Organic Acid And Its Derivatives	ÓÐ»úËá¼°ÆäÑÜÉúÎï	"300-84-5"	69700	41170	42220	123900	52370	72200	0.616130720006439	-0.698691625302	0.221553395759834	0.888888888888889	1.55957308611433
Com_569_pos	2,6-Dimethylaniline	2,6-¶þ¼×»ù±½°·	4.07	C8H11N	121.18	Benzene and substituted derivatives	±½¼°ÆäÑÜÉúÎï	"87-62-7"	49265	58940	53880	57350	31870	43260	1.22346769323672	0.290976006262	0.310769451783986	0.777777777777778	0.833273215579051
Com_56_neg	D-Mannose 6-phosphate	D-¸ÊÂ¶ÌÇ6-Á×Ëá	0.87	C6H13O9P	260.14	Carbohydrates And Its Derivatives	ÌÇÀà¼°ÆäÑÜÉúÎï	"3672-15-9"	373600000	489300000	269200000	315900000	330700000	126000000	1.46531193373026	0.551207816417	0.305043391739482	0.777777777777778	1.07889530649978
Com_570_pos	2-(Formylamino)Benzoic Acid	2-(¼×õ£°±»ù)±½¼×Ëá	4.07	C8H7NO3	164.138	Benzoic Acid And Its Derivatives	±½¼×Ëá¼°ÆäÑÜÉúÎï	"3342-77-6"	13060000	15340000	12480000	17100000	9102000	9777000	1.13621834959282	0.184240107382	0.499274318924087	0.666666666666667	1.0005895901252
Com_571_pos	L-Cysteine-glutathione gisulfide	L-°ëë×°±Ëá¹Èë×¸ÊëÄ¶þÁò»¯Îï	0.96	C13H22N4O8S2	426.466	Amino Acid And Its Derivatives	°±»ùËá¼°ÆäÑÜÉúÎï	"13081-14-6"	72710	52200	27880	94850	19350	14640	1.18588947531822	0.245969557236	0.532400798598024	0.666666666666667	0.795814074722505
Com_572_pos	L-Cystathionine	L-ë×ÁòÃÑ	0.84	C7H14N2O4S	222.262	Amino Acid And Its Derivatives	°±»ùËá¼°ÆäÑÜÉúÎï	"56-88-2"	68780	100000	59180	114800	88570	78280	0.809373335700337	-0.305122773785	0.315935231115881	0.777777777777778	1.06032182382641
Com_573_pos	L-Methionine Methyl Ester	L-µ°°±Ëá¼×õ¥	0.95	C6H14ClNO2S	199.699	Amino Acid And Its Derivatives	°±»ùËá¼°ÆäÑÜÉúÎï	"2491-18-1"	136300	134100	181800	182600	238000	199200	0.729590190383995	-0.454841762835	0.0676406001563566	1	1.96090279824305
Com_574_pos	Methionine sulfoxide	µ°°±Ëáí¿	0.92	C5H11NO4S	181.21	Amino Acid And Its Derivatives	°±»ùËá¼°ÆäÑÜÉúÎï	"62697-73-8"	99670	156900	155000	147400	162800	145200	0.903754940711462	-0.145996465775	0.505779562253937	0.444444444444444	0.818675492411305
Com_575_pos	L-Saccharopine	L-½ÍÄ¸°±Ëá	1.03	C11H20N2O6	276.286	Amino Acid And Its Derivatives	°±»ùËá¼°ÆäÑÜÉúÎï	"997-68-2"	410700	326500	248400	832900	1434000	280800	0.386858735329905	-1.37012124439	0.245159319632311	0.777777777777778	1.34213484623712
Com_576_pos	L-Methionine sulfone	L-µ°°±Ëáí¿	1.84	C5H11NO4S	181.21	Amino Acid And Its Derivatives	°±»ùËá¼°ÆäÑÜÉúÎï	"7314-32-1"	49760000	65620000	40130000	55450000	28300000	33360000	1.32789684911622	0.409143082642	0.291226208021171	0.777777777777778	1.43891618185533
Com_577_pos	L-Tyrosine	L-ÀÒ°±Ëá	1.84	C9H11NO3	181.189	Amino Acid And Its Derivatives	°±»ùËá¼°ÆäÑÜÉúÎï	"60-18-4"	51050000	66640000	42030000	57280000	29770000	34590000	1.313054916146	0.392927255602	0.292752425914333	0.777777777777778	1.42439059611497
Com_578_pos	L-Canavanine	L-¶¹°±Ëá	2.96	C5H12N4O3	176.174	Amino Acid And Its Derivatives	°±»ùËá¼°ÆäÑÜÉúÎï	"543-38-4"	56400	70040	16150	46090	65120	60900	0.828481784905003	-0.27145811635	0.52603079090811	0.555555555555556	0.857678199655
Com_579_pos	L-Alanyl-L-Lysine	L-±û°±õ£-Àµ°±Ëá	2.57	C9H19N3O3	217.265	Amino Acid And Its Derivatives	°±»ùËá¼°ÆäÑÜÉúÎï	"5051-06-9"	21630	28100	41830	23680	40100	46000	0.834031699763163	-0.261825876419	0.552937548894794	0.666666666666667	0.650890191986942
Com_57_neg	4-Hydroxy-6-methyl-2-pyrone	4-ôÇ»ù-6-¼×»ù-2-ßÁà«Íª	0.84	C6H6O3	126.11	Organoheterocyclic compounds	ÓÐ»úÔÓ»·»¯ºÏÎï	"675-10-5"	206600	146200	221700	247800	143000	393900	0.732126927488212	-0.44983430733	0.50444409788516	0.666666666666667	0.743517420677961
Com_580_pos	Oleamide	ÓÍËáõ£°·	15.08	C18H35NO	281.5	Fatty Acyls	Ö¬·¾õ£Àà	"301-02-0"	194200000	131800000	131700000	168000000	125600000	146200000	1.04070031832651	0.0575546877457	0.858811473665156	0.444444444444444	0.214516370251624
Com_581_pos	Indole-3-acetamide	ßÅßá-3-ÒÒõ£°·	0.81	C10H10N2O	174.2	Indole And Its Derivatives	ßÅßá¼°ÆäÑÜÉúÎï	"879-37-8"	399700	242500	277100	198600	247400	128500	1.60017406440383	0.678228847734	0.123046604408626	0.888888888888889	1.09288736408544
Com_582_pos	Stachydrine	Ë®ËÕ¼î	0.97	C7H13NO2	143.18	Amino Acid And Its Derivatives	°±»ùËá¼°ÆäÑÜÉúÎï	"471-87-4"	2174000	1933000	2292000	2822000	2834000	2873000	0.750263805838903	-0.414530133337	0.027708884049876	1	2.19017014596707
Com_583_pos	2-Pyrrolidinone	2-ßÁ¿©ÍéÍª	2.04	C4H7NO	85.1	Organoheterocyclic compounds	ÓÐ»úÔÓ»·»¯ºÏÎï	"616-45-5"	570700	676200	369500	649100	267400	313800	1.3138258961229	0.393774107135	0.389882268985974	0.777777777777778	0.955427674822007
Com_584_pos	7,8-dihydro-L-Biopterin	7,8-¶þÇâL-ÉúÎïµûßÊ	1.85	C9H13N5O3	239.23	Organoheterocyclic compounds	ÓÐ»úÔÓ»·»¯ºÏÎï	"6779-87-9"	6334	12370	11060	14500	9748	5932	0.986216037110669	-0.0200243818253	0.975192015598436	0.555555555555556	0.500689928730481
Com_585_pos	Acetylcarnitine	ÒÒõ£Èâ¼î	1.44	C9H17NO4	203.236	Carnitine	Èâ¼îÀà	"14992-62-2"	37930000	41500000	42950000	43560000	56020000	39180000	0.881954453733064	-0.181223941452	0.393380689316258	0.777777777777778	0.750015911050869
Com_586_pos	Acetylchloline Chloride	ÂÈ»¯ÒÒõ£µ¨¼î	0.9	C7H16NO2	146.21	Cholines	µ¨¼îÀà	"60-31-1"	202100	107500	220700	401500	157000	214600	0.685939723192343	-0.54384628944	0.389739583368241	0.666666666666667	1.26349035336224
Com_587_pos	Adipamide	¼º¶þõ£¶þ°·	0.84	C6H12N2O2	144.172	Hormones	¼¤ËØ	"628-94-4"	24950	12760	12020	19550	24430	29480	0.676967056901715	-0.562842464929	0.197713517327102	0.777777777777778	1.54048642118398
Com_588_pos	Ala-gly	L-±û°±õ£¸Ê°±Ëá	0.84	C5H10N2O3	146.144	Amino Acid And Its Derivatives	°±»ùËá¼°ÆäÑÜÉúÎï	"687-69-4"	6047000	7227000	9640000	7361000	5680000	7145000	1.13514316853265	0.182874267125	0.5181678881745	0.666666666666667	0.639370858943656
Com_589_pos	Adenylocuccinic Acid	ÏÙÜÕËá»ùçúçêËá	3.68	C14H18N5O11P	463.293	Organic Acid And Its Derivatives	ÓÐ»úËá¼°ÆäÑÜÉúÎï	"19046-78-7"	220400	764800	196200	331200	372500	301400	1.17540543229529	0.233158471065	0.937020448927444	0.666666666666667	0.0485146519493375
Com_58_neg	m-Coumaric acid	¼äÏã¶¹Ëá	1.83	C9H8O3	164.16	Cinnamic acids and derivatives	Èâ¹ðËá¼°ÆäÑÜÉúÎï	"588-30-7"	363700	447800	342300	372400	322300	245300	1.22744680851064	0.295660506609	0.231356639998362	0.777777777777778	1.28754554843761
Com_590_pos	S-adenosyl-L-methioninamine	S-ÏÙÜÕ-L-µ°°±Ëá°·	0.86	C15H22N6O5S	398.437	Amino Acid And Its Derivatives	°±»ùËá¼°ÆäÑÜÉúÎï	"91279-78-6"	27540	23900	30180	20270	69610	36750	0.644555002763958	-0.633624619421	0.465367498428989	0.666666666666667	0.835587373157542
Com_591_pos	5-Methoxyindole-3-Carbaldehyde	4-¼×Ñõ»ù-ßÅßá-3-¼×È©	11.35	C10H9NO2	175.184	Indole And Its Derivatives	ßÅßá¼°ÆäÑÜÉúÎï	"10601-19-1"	180600	220400	154600	190700	177900	179100	1.01442395471974	0.0206607189529	0.971213852704031	0.555555555555556	0.161795831245965
Com_592_pos	Protocatechualdehyde	Ô­¶ù²èÈ©	1.54	C7H6O3	138.12	Phenols And Its Derivatives	·ÓÀà¼°ÆäÑÜÉúÎï	"139-85-5"	35650	95640	79240	40750	60580	51300	1.37934875188364	0.463987271211	0.500698438176779	0.666666666666667	0.869760467930193
Com_593_pos	Spermine	¾«°·	0.73	C10H26N4	202.34	Polyamine	¶à°·	"71-44-3"	3444000	5678000	2548000	3431000	29040000	20520000	0.220226076126135	-2.18294279188	0.194269809393842	0.777777777777778	1.6257703868603
Com_594_pos	Histamine	×é°·	0.699	C5H9N3	111.15	Amino Acid And Its Derivatives	°±»ùËá¼°ÆäÑÜÉúÎï	"51-45-6"	2503000	4193000	1609000	2905000	2035000	6166000	0.747793985233207	-0.419287227742	0.582301206960328	0.666666666666667	0.70266300150884
Com_595_pos	(+,-)-Octopamine HCl	ÕÂÓã°·	1.034	C8H12ClNO2	189.64	Polyamine	¶à°·	"770-05-8"	5373000	4998000	5454000	5295000	5148000	5559000	0.98893888263967	-0.016046731069	0.763175566757971	0.444444444444444	0.267509374047807
Com_596_pos	Sepiapterin	Ä«à©ßÊ	0.84	C9H11N5O3	237.22	Organoheterocyclic compounds	ÓÐ»úÔÓ»·»¯ºÏÎï	"17094-01-8"	30310	21310	11060	27860	16580	53900	0.637380516575147	-0.649773175348	0.409577213383566	0.666666666666667	1.16059325796897
Com_597_pos	11-cis-Retinol	11-Ë³ÊÓ»Æ´¼	12.17	C20H30O	286.5	Prenol lipids	Ï©´¼õ¥	"22737-96-8"	2677	4076	10079	2403	8224	1925	1.34098151688974	0.423289352324	0.586152850792963	0.777777777777778	0.793381024957651
Com_598_pos	Quinone	±½õ«	7.24	C6H4O2	108.09	Ketones	ÍªÀà	"106-51-4"	38450	37680	46240	30220	53410	52920	0.896155254485536	-0.158179401139	0.716991721832176	0.666666666666667	0.658928282036157
Com_599_pos	L-Leucyl-L-alanine Hydrate	L-ÁÁ°±Ëá-L-±û°±Ëá	3.0	C9H18N2O3	202.25	Amino Acid And Its Derivatives	°±»ùËá¼°ÆäÑÜÉúÎï	"7298-84-2"	107100	346400	211100	117600	221400	48850	1.71354905246874	0.776987491385	0.339600767433256	0.666666666666667	0.79813326177217
Com_59_neg	Isocitrate	ÒìÄûÃÊËá	1.46	C6H8O7	192.12	Organic Acid And Its Derivatives	ÓÐ»úËá¼°ÆäÑÜÉúÎï	"320-77-4"	2222000	1771000	348300	1463000	1492000	2496000	0.79642267473858	-0.328393798657	0.518431513171375	0.444444444444444	0.9404567571756
Com_5_neg	Maltotriose	ÂóÑ¿ÈýÌÇ	0.7	C18H32O16	504.437	Carbohydrates And Its Derivatives	ÌÇÀà¼°ÆäÑÜÉúÎï	"1109-28-0"	906400	1385000	1094000	1056000	1235000	1073000	1.0063614744352	0.00914859908546	0.965673130920518	0.555555555555556	0.0664505423046139
Com_600_pos	3-Amino-4-methylpentanoic acid	3-°±»ù-4-¼×»ùÎìËá	1.862	C6H13NO2	131.17	Organic Acid And Its Derivatives	ÓÐ»úËá¼°ÆäÑÜÉúÎï	"5699-54-7"	63610	76620	36550	50560	46340	69830	1.06027709470401	0.0844413505558	0.918132522349486	0.555555555555556	0.125192646699296
Com_601_pos	L-Lysine	L-Àµ°±Ëá	0.74	C6H14N2O2	146.19	Amino Acid And Its Derivatives	°±»ùËá¼°ÆäÑÜÉúÎï	"56-87-1"	75570000	96710000	112900000	91430000	71410000	91920000	1.11940650023552	0.162734030397	0.504819726063936	0.777777777777778	0.65936692234233
Com_602_pos	Cocamidopropyl Betaine	Ò¬ÓÍõ£°·±û»ùÌð²Ë¼î	9.91	C19H38N2O3	342.5	Amino Acid And Its Derivatives	°±»ùËá¼°ÆäÑÜÉúÎï	"86438-79-1"	274000	237200	227700	232800	236000	258200	1.01636863823934	0.0234237644132	0.840967632270675	0.555555555555556	0.279302467704465
Com_603_pos	Thiamine	Áò°·ËØ	0.81	C12H17N4OS+	265.35	Vitamins	Î¬ÉúËØ	"70-16-6"	5877	5960	4883	5660	7372	8605	0.772750381291307	-0.371925633948	0.170726516856037	0.777777777777778	0.583397447912949
Com_604_pos	Vitamin U	Î¬ÉúËØU	0.75	C6H14ClNO2S	199.7	Vitamins	Î¬ÉúËØ	"3493-12-7"	130900	68050	53100	36390	91270	113252	1.04623264926612	0.0652036973034	0.871131290806839	0.444444444444444	0.574764958378344
Com_605_pos	Acetylcholine	ÒÒõ£µ¨¼î	1.02	C7H16INO2	146.207	Cholines	µ¨¼îÀà	"51-84-3"	16230000	7184000	9705000	27870000	10770000	14310000	0.62547686496695	-0.676971571671	0.296119202421399	0.777777777777778	1.39666872641543
Com_606_pos	Metformin	¶þ¼×Ë«ëÒ	0.68	C4H11N5	129.165	Others	ÆäËü	"657-24-9"	850400	839700	781400	760300	970200	910100	0.935961523896084	-0.0954788710886	0.495049985383051	0.666666666666667	0.717740316354417
Com_607_pos	dGMP	2'-ÍÑÑõ-5'-ÄñÜÕËá	1.04	C10H14N5O7P	347.221	Nucleotide And Its Derivates	ºËÜÕËá¼°ÆäÑÜÉúÎï	"902-04-5"	6773	47730	79440	15050	85170	63650	0.817373527796424	-0.290932575208	0.699615485091182	0.666666666666667	0.543332184325416
Com_608_pos	S-Adenosyl-L-homocysteine	S-(5'-ÏÙÜÕ)-L-¸ß°ëë×°±Ëá	1.84	C14H20N6O5S	384.411	Amino Acid And Its Derivatives	°±»ùËá¼°ÆäÑÜÉúÎï	"979-92-0"	1319000	1572000	1341000	1300000	1231000	688400	1.31453065788656	0.394547789324	0.26538803104735	1	1.52080587655086
Com_609_pos	thiamine phosphate	Á×ËáÁò°·ËØ	0.84	C12H18ClN4O4PS	380.787	Pyrimidines and pyrimidine derivatives	à×à¤¼°ÆäÑÜÉúÎï	"532-40-1"	91320	91960	61250	86940	78940	77540	1.004560019719	0.00656376373685	0.941575669217433	0.666666666666667	0.0950337413693425
Com_60_neg	3-Oxo-7alpha,12alpha-hydroxy-5beta-cholanoic acid	3-ÍÑÇâµ¨Ëá	10.321	C24H38O5	406.562	Bile Acids	µ¨Ö­Ëá	"2304-89-4"	10590	11160	13220	15590	12050	11870	0.885092381675525	-0.17610005028	0.349456218357119	0.777777777777778	0.553738165009958
Com_610_pos	L-arginino-succinate	L-¾«°±Ëá-çúçêËá	2.3	C10H18N4O6	290.273	Amino Acid And Its Derivatives	°±»ùËá¼°ÆäÑÜÉúÎï		44930	52690	59380	53030	45490	52510	1.03952857048269	0.055929409882	0.736265551661017	0.555555555555556	0.347214612910722
Com_611_pos	L-Normetanephrine	¼×Ñõ»ùÈ¥¼×ÉöÉÏÏÙËØ	4.06	C9H13NO3	183.204	Hormones	¼¤ËØ	"97-31-4"	180500	186200	160200	249200	127800	150500	0.998862559241706	-0.00164191410843	0.866723848222619	0.666666666666667	0.488608154642541
Com_612_pos	Cystine	DL-ë×°±Ëá	0.84	C6H12N2O4S2	240.301	Amino Acid And Its Derivatives	°±»ùËá¼°ÆäÑÜÉúÎï	"923-32-0"	3310000	3164000	3584000	3723000	3791000	2809000	0.974329167877555	-0.0375188393794	0.873338568713846	0.666666666666667	0.222899060764436
Com_613_pos	D-Homocysteine	D-¸ß°ëë×°±Ëá	1.86	C4H9NO2S	135.185	Amino Acid And Its Derivatives	°±»ùËá¼°ÆäÑÜÉúÎï	"454-28-4"	179100	248700	145600	216900	118100	134300	1.22181973151502	0.289031444212	0.432917800536251	0.777777777777778	1.12947160125909
Com_614_pos	Dimethyl fumarate	¸»ÂíËá¶þ¼×õ¥	0.9	C6H8O4	144.125	Fatty Acyls	Ö¬·¾õ£Àà	"624-49-7"	503500	659300	523100	468000	689200	389300	1.09013902360168	0.124512131214	0.606821241960759	0.666666666666667	0.568485232857938
Com_615_pos	Adipic Acid	¼º¶þËá	0.84	C6H10O4	146.14	Fatty Acyls	Ö¬·¾õ£Àà	"124-04-9"	2403000	3025000	3701000	2886000	2197000	3054000	1.12191225267298	0.165959843875	0.534685857761286	0.666666666666667	0.619665124421108
Com_616_pos	Maleic Acid	ÂíÀ´Ëá	0.94	C4H4O4	116.07	Organic Acid And Its Derivatives	ÓÐ»úËá¼°ÆäÑÜÉúÎï	"110-16-7"	3218000	3459000	2936000	2848000	1640000	2055000	1.46920372917622	0.555034463078	0.115787591943268	1	1.90075283971672
Com_617_pos	Pipecolinic Acid	D-ßßà¤Ëá	0.85	C6H11NO2	129.16	Amino Acid And Its Derivatives	°±»ùËá¼°ÆäÑÜÉúÎï	"1723-00-8"	1206000	1064000	1237000	1218000	1074000	1112000	1.03025851938895	0.0430063935668	0.653161292463271	0.555555555555556	0.246286506658921
Com_618_pos	Isonicotinamide	ÒìÑÌõ£°·	1.51	C6H6N2O	122.12	Pyridine And Its Derivatives	ßÁà¤¼°ÆäÑÜÉúÎï	"1453-82-3"	32330000	77810000	45850000	36240000	55460000	39520000	1.18876695625667	0.249465919452	0.693805693543662	0.555555555555556	0.567577430583334
Com_619_pos	2,6-Diaminooimelic Acid	2,6-¶þ°±»ù¸ý¶þËá	0.94	C7H14N2O4	190.2	Amino Acid And Its Derivatives	°±»ùËá¼°ÆäÑÜÉúÎï	"583-93-7"	83100	46880	56890	77910	71940	75610	0.828838818415684	-0.270836522094	0.326909035151686	0.666666666666667	1.30108641009569
Com_61_neg	gamma-Muricholate	3a,6a,7a-ÈýôÇ»ù-5¦Â-µ¨Ëá	9.997	C24H40O5	408.57	Bile Acids	µ¨Ö­Ëá	"547-75-1"	9208	20180	18236	3798	16510	25791	1.0330809778954	0.0469533440668	0.723884181834232	0.555555555555556	0.732540114909265
Com_620_pos	1,3-Diaminopropane	1,3-¶þ°±»ù±ûÍé	0.65	C3H10N2	74.13	Amines	°·Àà	"109-76-2"	23190	18040	8578	35040	18900	21290	0.662076299348664	-0.594930608446	0.277996969962204	0.777777777777778	1.4175819213931
Com_621_pos	trans-Cinnamic acid	·´Ê½Èâ¹ðËá	4.07	C9H8O2	148.16	Cinnamic acids and derivatives	Èâ¹ðËá¼°ÆäÑÜÉúÎï	"140-10-3"	148900	163700	137300	166000	94740	122800	1.17301976325807	0.230227320369	0.377308410295797	0.666666666666667	1.21502502518618
Com_622_pos	Pyrrole-2-carboxylate	ßÁ¿©-2-ôÈËá	1.01	C5H5NO2	111.1	Organoheterocyclic compounds	ÓÐ»úÔÓ»·»¯ºÏÎï	"634-97-9"	129900	564900	323900	162800	383000	448700	1.02433383609854	0.0346859743158	0.923917331751351	0.555555555555556	0.262615206242547
Com_623_pos	Oxypurinol	ôÇ»ùàÑßÊ	1.68	C5H4N4O2	152.11	Nucleotide And Its Derivates	ºËÜÕËá¼°ÆäÑÜÉúÎï	"2465-59-0"	289000	467300	287500	629300	347400	654200	0.640014715801091	-0.643823017635	0.174581964734732	0.888888888888889	1.50250557830898
Com_624_pos	PAF C-16	¦¢-ÒÒõ£»ù-¦£-O-Ê®ÁùÍé»ù-L-¦¡-ÂÑÁ×Ö¬	13.8	C26H54NO7P	523.683	Phospholipid	Á×Ö¬	"74389-68-7"	90160	138900	65390	115300	49640	129600	0.999694438785903	-0.000440899012515	0.93417807197313	0.444444444444444	0.275759645306179
Com_625_pos	N7-Methylguanosine	7-¼×»ùÄñÜÕ	4.15	C11H17N5O5	298.28	Nucleotide And Its Derivates	ºËÜÕËá¼°ÆäÑÜÉúÎï	"20244-86-4"	256700	364300	298000	412000	276800	271700	0.956793336803748	-0.0637207523765	0.845761052096722	0.444444444444444	0.653601724937549
Com_626_pos	7-Methylguanine	7-¼×»ùÄñàÑßÊ	4.09	C6H7N5O	165.153	Nucleotide And Its Derivates	ºËÜÕËá¼°ÆäÑÜÉúÎï	"578-76-7"	43050000	50460000	40850000	56220000	29500000	31750000	1.14378139099345	0.193811338596	0.488512607176961	0.666666666666667	1.04201772373136
Com_627_pos	7-Ketocholesterol	7-Íªµ¨¹Ì´¼	16.92	C27H44O2	400.637	Hormones	¼¤ËØ	"566-28-9"	157900	107100	145500	120300	92160	181400	1.04224851470066	0.0596993161755	0.787331723200308	0.555555555555556	0.409021159206634
Com_628_pos	Propionyl-L-carnitine	±ûõ£Èâ¼î	2.57	C10H19NO4	217.26	Carnitine	Èâ¼îÀà	"17298-37-2"	407800	558800	888900	592600	715700	940400	0.825143416196024	-0.277283202374	0.449226833990901	0.777777777777778	0.884646530781024
Com_629_pos	Punicic Acid	Ê¯ÁñËá	12.7	C18H30O2	278.43	Fatty Acyls	Ö¬·¾õ£Àà	"544-72-9"	167100	264400	109400	150800	124700	224100	1.08266613290632	0.114588420546	0.890078772884199	0.555555555555556	0.145589680618656
Com_62_neg	N alpha-Acetyl-L-Arginine	N¦Á-ÒÒõ£-L-¾«°±Ëá	1.03	C8H16N4O3	216.238	Amino Acid And Its Derivatives	°±»ùËá¼°ÆäÑÜÉúÎï	"155-84-0"	26320	10630	19940	21100	11540	16940	1.14743848325938	0.198416809608	0.771823410844616	0.555555555555556	0.274189783867038
Com_630_pos	Pro-Leu	¸¬°±Ëá-ÁÁ°±Ëá	1.72	C11H20N2O3	228.288	Amino Acid And Its Derivatives	°±»ùËá¼°ÆäÑÜÉúÎï	"52899-07-7"	15380000	15070000	9342000	12160000	10690000	7423000	1.31443860866118	0.394446761927	0.288409139688654	0.777777777777778	0.928036169075366
Com_631_pos	Propionylcholine	±ûõ£µ¨¼î	1.03	C8H18NO2+	160.234	Cholines	µ¨¼îÀà	"5072-54-8"	635000	612700	1019000	711600	497100	897600	1.07615249489626	0.105882527748	0.770937753808152	0.444444444444444	0.385889224103165
Com_632_pos	p-Mentha-1,3,8-triene	¶Ô-±¡ºÉ-1,3,8-ÈýÏ©	11.37	C10H14	134.218	Fatty Acyls	Ö¬·¾õ£Àà	"18368-95-1"	1349000	1385000	1008000	1445000	1328000	1336000	0.910683864687272	-0.134977771927	0.420967178089005	0.444444444444444	1.02661799074923
Com_633_pos	Porphobilinogen	µ¨É«ËØÔ­	4.9	C10H14N2O4	226.229	Organic nitrogen compounds	ÓÐ»úµª»¯ºÏÎï	"487-90-1"	230000	249400	187500	227100	128300	157000	1.30152224824356	0.380199973406	0.22685033866534	0.888888888888889	1.57802189163601
Com_634_pos	4-Aminobenzoate	¶Ô-°±»ù±½¼×Ëá	2.74	C7H7NO2	137.136	Benzoic Acid And Its Derivatives	±½¼×Ëá¼°ÆäÑÜÉúÎï	"150-13-0"	1225000	6303000	5855000	4104000	5869000	2818000	1.04628254241263	0.0652724954611	0.830861034165481	0.555555555555556	0.319684558576362
Com_635_pos	Picolinamide	ßÁà¤õ£°·	1.51	C6H6N2O	122.125	Pyridine And Its Derivatives	ßÁà¤¼°ÆäÑÜÉúÎï	"1452-77-3"	28210000	66930000	42170000	35270000	49200000	34160000	1.1574643850628	0.210967802744	0.746030951572795	0.555555555555556	0.475639153083832
Com_636_pos	5-Methyl-2'-deoxycytidine	5-¼×»ù-2'-ÍÑÑõ°ûÜÕ	1.722	C10H15N3O4	241.24	Nucleotide And Its Derivates	ºËÜÕËá¼°ÆäÑÜÉúÎï	"838-07-3"	17590	3879	9579	19690	11639	7311	0.80351966873706	-0.315594755938	0.586598795783649	0.666666666666667	0.810548850602548
Com_637_pos	Ethyl chrysanthemumate	¾ÕËáÒÒõ¥	1.18	C12H20O2	196.29	Organoheterocyclic compounds	ÓÐ»úÔÓ»·»¯ºÏÎï	"97-41-6"	3230000	7134000	5192000	5643000	4526000	2772000	1.20207093733096	0.265522035746	0.604895596291436	0.666666666666667	0.623202878283867
Com_638_pos	Guggulsterone	¹ÌçÞÍª	15.17	C21H28O2	312.446	Hormones	¼¤ËØ	"95975-55-6"	173700	213500	170300	171800	268700	260300	0.795519406392694	-0.330030969906	0.277068986040282	0.777777777777778	1.55579471959954
Com_639_pos	4-Chloro-6-methoxy-2-(methylsulfinyl)pyrimidine	ÄñàÑßÊºËÜÕ	2.72	C10H13N5O5	283.241	Nucleotide And Its Derivates	ºËÜÕËá¼°ÆäÑÜÉúÎï	"85-30-3"	288500	1140000	589300	2222000	551200	1063000	0.525989260205412	-0.926894752417	0.324245195352567	0.666666666666667	1.30486653468432
Com_63_neg	L-Fucose	L-ÑÒÔåÌÇ	0.98	C6H12O5	164.156	Carbohydrates And Its Derivatives	ÌÇÀà¼°ÆäÑÜÉúÎï	"2438-80-4"	4056	9769	11110	10450	6727	9688	0.928159315093988	-0.107555635042	0.704129585340741	0.555555555555556	0.593426923192885
Com_640_pos	Guanine	ÄñàÑßÊ	2.72	C5H5N5O	151.126	Nucleotide And Its Derivates	ºËÜÕËá¼°ÆäÑÜÉúÎï	"73-40-5"	54300	268200	91900	403300	91320	218400	0.581189868446888	-0.782918541381	0.401910259197926	0.666666666666667	1.16041175147697
Com_641_pos	Imatinib	ÒÁÂíÌæÄá	11.76	C29H31N7O	493.603	Others	ÆäËü	"152459-95-5"	190700	727900	98330	224000	93800	281100	1.69799632659876	0.763833337805	0.706409541270924	0.444444444444444	0.565754275779304
Com_642_pos	Hydrocortisone 17-butyrate	Çâ»¯¿ÉµÄËÉ¶¡Ëáõ¥	10.51	C25H36O6	432.55	Others	ÆäËü	"13609-67-1"	65200	88680	74580	108400	71800	83240	0.867218341937443	-0.205532824424	0.420378253203914	0.666666666666667	0.874379275787831
Com_643_pos	Homoserine	Í¬ÐÍË¿°±Ëá	0.9	C4H9NO3	119.119	Amino Acid And Its Derivatives	°±»ùËá¼°ÆäÑÜÉúÎï	"1927-25-9"	11820000	15750000	13850000	14060000	6147000	8059000	1.46536474916861	0.551259815719	0.208220829716609	0.777777777777778	1.44104189058096
Com_644_pos	Homocysteic acid	Í¬ÐÍ°ëë×°±Ëá	1.83	C4H9NO5S	183.18	Amino Acid And Its Derivatives	°±»ùËá¼°ÆäÑÜÉúÎï	"1001-13-4"	249000	395700	216000	273500	189700	194900	1.30785594894393	0.387203646961	0.327484565658467	0.777777777777778	1.33133390040305
Com_645_pos	glutathione disulfide	L-¹Èë×¸ÊëÄ	1.81	C20H32N6O12S2	612.631	Amino Acid And Its Derivatives	°±»ùËá¼°ÆäÑÜÉúÎï	"27025-41-8"	964500	1700000	283700	501500	572100	594300	1.76761196714431	0.821801603622	0.591908429811692	0.666666666666667	0.791747811362754
Com_646_pos	Phe-Pro	L-±½±û°±õ£-L-¸¬°±Ëá	5.58	C14H18N2O3	262.304	Amino Acid And Its Derivatives	°±»ùËá¼°ÆäÑÜÉúÎï	"7669-65-0"	95380	91330	168000	102500	81390	87000	1.30942448964524	0.388932866443	0.357893987374429	0.777777777777778	0.577132699507794
Com_647_pos	Phe-Phe	L-±½±û°±Ëá-L-±½±û°±Ëá	6.51	C18H20N2O3	312.363	Amino Acid And Its Derivatives	°±»ùËá¼°ÆäÑÜÉúÎï	"2577-40-4"	35500	82300	34890	35470	60540	32080	1.19205246311187	0.253447731275	0.726424351860241	0.666666666666667	0.405920201198366
Com_648_pos	alpha-Nicotinamide adenine dinucleotide	¦Á-ÑÌõ£°·ÏÙàÑßÊ¶þºËÜÕËá	1.04	C21H27N7O14P2	663.425	Nucleotide And Its Derivates	ºËÜÕËá¼°ÆäÑÜÉúÎï	"7298-93-3"	39110000	35040000	35840000	39070000	34000000	30590000	1.06106502025854	0.0855130648582	0.48191855770891	0.777777777777778	0.821169034443827
Com_649_pos	trans-3-Hydroxy-L-proline	·´-3-ôÇ»ù-L-¸¬°±Ëá	2.14	C5H9NO3	131.13	Amino Acid And Its Derivatives	°±»ùËá¼°ÆäÑÜÉúÎï	"4298-08-2"	4198000	5627000	3897000	5143000	2355000	2673000	1.34912987906794	0.432029241442	0.287885415713606	0.777777777777778	1.17595950807755
Com_64_neg	Prostaglandin B2	Ç°ÁÐÏÙËØB2	0.7	C20H30O4	334.45	Hormones	¼¤ËØ	"13367-85-6"	113000	123600	91120	68870	80860	120200	1.21409254251102	0.279878393203	0.336351701030692	0.777777777777778	1.17806862463572
Com_650_pos	4-Acetamidobutanoate	4-ÒÒõ£°±»ù¶¡Ëá	1.03	C6H11NO3	145.156	Organic Acid And Its Derivatives	ÓÐ»úËá¼°ÆäÑÜÉúÎï	"3025-96-5"	222500	58280	87760	333700	188700	230200	0.489689077863407	-1.03006207668	0.153701983569062	0.888888888888889	1.2163344286249
Com_651_pos	Val-Ser	çÓ°±õ£-Ë¿°±Ëá	1.01	C8H16N2O4	204.224	Amino Acid And Its Derivatives	°±»ùËá¼°ÆäÑÜÉúÎï	"13588-94-8"	71990	96500	65000	121300	74670	73930	0.865098184512782	-0.209064213848	0.553903656063882	0.777777777777778	0.438903582005301
Com_652_pos	L-Alanine	L-±û°±Ëá	0.86	C3H7NO2	89.09	Amino Acid And Its Derivatives	°±»ùËá¼°ÆäÑÜÉúÎï	"56-41-7"	22430000	18740000	19060000	18530000	14880000	18620000	1.15760138381703	0.211138551606	0.192381287808026	1	1.69693856323777
Com_653_pos	L-Aspartic acid	L-Ìì¶¬°±Ëá	0.86	C4H7NO4	133.1	Amino Acid And Its Derivatives	°±»ùËá¼°ÆäÑÜÉúÎï	"56-84-8"	5819000	7151000	9074000	5596000	5284000	7098000	1.22616531316053	0.294153498114	0.287528935969513	0.888888888888889	1.08347892044546
Com_654_pos	beta-Nicotinamide mononucleotide	¦Â-ÑÌõ£°·µ¥ºËÜÕËá	0.993	C11H15N2O8P	334.219	Nucleotide And Its Derivates	ºËÜÕËá¼°ÆäÑÜÉúÎï	"1094-61-7"	250300	912500	363900	364100	567800	507300	1.06079766536965	0.0851495054469	0.863382468602771	0.666666666666667	0.197577771250298
Com_655_pos	Creatine	¼¡Ëá	0.94	C4H9N3O2	131.133	Organic Acid And Its Derivatives	ÓÐ»úËá¼°ÆäÑÜÉúÎï	"57-00-1"	331900000	327700000	289900000	330500000	332400000	299900000	0.986186123805567	-0.0200681414376	0.802417357583758	0.666666666666667	0.355796143888687
Com_656_pos	Choline Glycerophosphate	¸ÊÓÍÁ×Ö¬µ¨¼î	0.89	C8H20NO6P	257.22	Cholines	µ¨¼îÀà	"28319-77-9"	23200000	22790000	8393000	14390000	11810000	19890000	1.17993057062269	0.238701971142	0.822656585137816	0.666666666666667	0.261443159937157
Com_657_pos	DL-Citrulline	DL-¹Ï°±Ëá	0.9	C6H13N3O3	175.19	Amino Acid And Its Derivatives	°±»ùËá¼°ÆäÑÜÉúÎï	"627-77-0"	1101000	1153000	1187000	1062000	925300	826100	1.22307528257624	0.290513207182	0.0944372145437751	1	1.08194060496433
Com_658_pos	4-Aminobutyric acid	¦Ã-°±»ù¶¡Ëá	0.864	C4H9NO2	103.12	Organic Acid And Its Derivatives	ÓÐ»úËá¼°ÆäÑÜÉúÎï	"56-12-2"	341500	278000	209300	323600	197300	309600	0.997953040337146	-0.00295616516318	0.993858301802128	0.444444444444444	0.190618842577827
Com_659_pos	Glycine	¸Ê°±Ëá	0.88	C2H5NO2	75.07	Amino Acid And Its Derivatives	°±»ùËá¼°ÆäÑÜÉúÎï	"56-40-6 "	526800	281200	345900	438600	194200	317300	1.21450373644879	0.280366928465	0.519071095232852	0.666666666666667	0.817099650600156
Com_65_neg	Uridine 5'-Diphospho-N-Acetylgalactosamine	ÄòÜÕ-5'-¶þÁ×Ëá-N-ÒÒõ£»ù°±»ù°ëÈéÌÇ	1.0	C17H27N3O17P2	607.354	Nucleotide And Its Derivates	ºËÜÕËá¼°ÆäÑÜÉúÎï	"7277-98-7"	2401000	3467000	2094000	2631000	1497000	3856000	0.997244488977956	-0.00398084924591	0.892472406192241	0.555555555555556	0.232070808339807
Com_660_pos	L-Arginine	¾«°±Ëá	0.794	C6H14N4O2	174.2	Amino Acid And Its Derivatives	°±»ùËá¼°ÆäÑÜÉúÎï	"74-79-3"	8593000	5831000	5499000	4567000	5259000	2862000	1.57022383354351	0.650970228242	0.120765720881529	1	1.00775354508691
Com_661_pos	L-Cysteine	L-°ëë×°±Ëá	0.88	C3H7NO2S	121.16	Amino Acid And Its Derivatives	°±»ùËá¼°ÆäÑÜÉúÎï	"52-90-4"	380600	372300	346000	494600	350100	376300	0.9	-0.152003093445	0.46597794329519	0.666666666666667	0.712277259637924
Com_662_pos	Nicotinate ribonucleoside	ÑÌËáºËÜÕ	1.04	C11H13NO6	255.224	Carbohydrates And Its Derivatives	ÌÇÀà¼°ÆäÑÜÉúÎï	"17720-18-2"	24200	18270	28940	21160	62620	31750	0.618107850774691	-0.694069505621	0.340373158439418	0.777777777777778	1.17610784613985
Com_663_pos	S-Methyl-L-cysteine	S-¼×»ù-L-°ëë×°±Ëá	1.04	C4H9NO2S	135.185	Amino Acid And Its Derivatives	°±»ùËá¼°ÆäÑÜÉúÎï	"1187-84-4"	2853000	1587000	1558000	1975000	2226000	1825000	0.995353468304016	-0.00671915072572	0.852388648665066	0.666666666666667	0.0889561076027524
Com_664_pos	MAG (18:2)	µ¥õ£¸ÊÓÍõ¥ (õ£»ù 18:2)	14.64	C21H38O4	354.1	Glycerolipids	¸ÊÓÍÖ¬Àà		8823	16340	10010	8864	14060	4861	1.26589886629476	0.340162151272	0.475683314088709	0.666666666666667	1.02000501442054
Com_665_pos	Tetraethylammonium fluoride dihydrate	°ûà×à¤ºËÜÕ	1.04	C8H20FN	149.25	Nucleotide And Its Derivates	ºËÜÕËá¼°ÆäÑÜÉúÎï	"63123-01-3"	673100	457900	324500	642800	351200	614000	0.905161691542289	-0.143752567056	0.723710342951585	0.555555555555556	0.475662507150575
Com_666_pos	Cholesterol	µ¨¹Ì´¼	11.2	C27H46O	386.654	Hormones	¼¤ËØ	"57-88-5"	445100	318900	382500	370300	377900	337100	1.05638993826592	0.0791424655319	0.684256102531503	0.666666666666667	0.533304124538171
Com_667_pos	5'-Deoxy-5'-(methylthio)adenosine	5-ÍÑÑõ-5-¼×ÁòÏÙÜÕ	4.91	C11H15N5O3S	297.333	Nucleotide And Its Derivates	ºËÜÕËá¼°ÆäÑÜÉúÎï	"2457-80-9"	787900	885800	641800	715700	765900	603200	1.11065809669992	0.151414768023	0.442726448575638	0.777777777777778	1.00706185386321
Com_668_pos	L-Valine	L-çÓ°±Ëá	1.2	C5H11NO2	117.146	Amino Acid And Its Derivatives	°±»ùËá¼°ÆäÑÜÉúÎï	"72-18-4"	2329000	2702000	1710000	2374000	1005000	1261000	1.45280172413793	0.538837819886	0.239019569726477	0.777777777777778	1.37793664385699
Com_669_pos	Hypoxanthine-9-beta-D-Arabinofuranoside	°¢ÌÇ¼¡ÜÕ	2.58	C10H12N4O5	268.226	Nucleotide And Its Derivates	ºËÜÕËá¼°ÆäÑÜÉúÎï	"7013-16-3"	3865000	19280000	15110000	10580000	17860000	7017000	1.07891248554587	0.109577847412	0.929534691691451	0.555555555555556	0.161757379294084
Com_66_neg	D-Glucuronic acid	ÆÏÌÑÌÇÈ©Ëá	0.894	C6H10O7	194.14	Sugar Acids And Its Derivatives	ÌÇËá¼°ÆäÑÜÉúÎï	"6556-12-3"	48750	37170	52330	31370	44270	66200	0.974689791314157	-0.0369849608893	0.968482140163496	0.555555555555556	0.432122139701719
Com_670_pos	4-aminobutyrate	4-°±»ù¶¡Ëáõ¥	0.84	C4H9NO2	103.12	Organic Acid And Its Derivatives	ÓÐ»úËá¼°ÆäÑÜÉúÎï		120900	74390	78300	100800	69950	102600	1.00087799524419	0.00126612364075	0.966157092601092	0.444444444444444	0.0619627907949992
Com_671_pos	3-Methylhistidine	3-N-¼×»ù-L-×é°±Ëá	0.76	C7H13N3O3	169.181	Amino Acid And Its Derivatives	°±»ùËá¼°ÆäÑÜÉúÎï	"368-16-1"	35870000	34930000	33970000	42910000	40080000	41990000	0.83829412706033	-0.25447157268	0.00284499923384224	1	1.39494566780029
Com_672_pos	3-OH-anthranilate	3-ôÇ»ù-ÁÚ°±»ù±½¼×Ëáõ¥	1.68	C7H7NO3	153.14	Organic Acid And Its Derivatives	ÓÐ»úËá¼°ÆäÑÜÉúÎï		239300	319000	399100	199000	172700	227200	1.59859742861913	0.676806673741	0.0720746999230895	1	1.67433672836532
Com_673_pos	3-Methoxytyramine	3-¼×ÑõÀÒ°·	18.4	C9H13NO2	167.205	Phenols And Its Derivatives	·ÓÀà¼°ÆäÑÜÉúÎï	"554-52-9"	194600	173800	202900	168600	190500	240300	0.95311978645312	-0.0692705539296	0.755123896906554	0.555555555555556	0.454830889243313
Com_674_pos	3-Nitro-L-Tyrosine	3-Ïõ»ù-L-ÀÒ°±Ëá	8.98	C9H10N2O5	226.186	Amino Acid And Its Derivatives	°±»ùËá¼°ÆäÑÜÉúÎï	"621-44-3"	121700	114100	122600	121100	110600	122800	1.01100141043724	0.0157850099307	0.789632748149099	0.555555555555556	0.242129594227525
Com_675_pos	3-amino isobutanoate	3-°±»ùÒì¶¡Ëáõ¥	0.91	C4H9NO2	103.12	Amino Acid And Its Derivatives	°±»ùËá¼°ÆäÑÜÉúÎï		30490	28820	21310	14950	28370	35280	1.02569974554707	0.0366084707051	0.80883648055041	0.555555555555556	0.728522866936743
Com_676_pos	3-Guanidinopropanoate	3-ëÒ»ù±ûËá	0.9	C4H9N3O2	131.133	Organic nitrogen compounds	ÓÐ»úµª»¯ºÏÎï	"353-09-3"	9682000	9555000	9514000	10380000	11360000	9323000	0.925570614557512	-0.111585033062	0.323612541435768	0.666666666666667	1.11859462883691
Com_677_pos	3,5-Diiodo-L-thyronine	3,5-¶þµâ-L-¼××´ÏÙËØ	0.71	C15H13I2NO4	525.077	Organic Acid And Its Derivatives	ÓÐ»úËá¼°ÆäÑÜÉúÎï	"1041-01-6"	33500	26410	31150	25840	21730	12910	1.50562169312169	0.590359319798	0.156524761313107	1	1.59821066848297
Com_678_pos	3'-Adenylic acid	ÏÙÜÕ-3'-Á×Ëá	5.13	C10H14N5O7P	347.221	Nucleotide And Its Derivates	ºËÜÕËá¼°ÆäÑÜÉúÎï	"84-21-9"	647100	537200	287900	576000	540300	397000	0.972840811471618	-0.0397243425936	0.812840597121454	0.555555555555556	0.408610274561146
Com_67_neg	L-Lactic acid	L-ÈéËá	1.487	C3H6O3	90.08	Organic Acid And Its Derivatives	ÓÐ»úËá¼°ÆäÑÜÉúÎï	"79-33-4"	2162000	2865000	2505000	2751000	2392000	2439000	0.993405433922448	-0.00954545655642	0.910442707819275	0.555555555555556	0.481300935994678
Com_68_neg	L-Malate	Æ»¹ûËá	1.089	C4H6O5	134.09	Tca Cycle	ÈýôÈËáÑ­»·	"97-67-6"	11490000	11750000	16210000	11230000	9545000	9992000	1.28221796080216	0.358641522675	0.153180147256466	1	1.45951431767367
Com_69_neg	3-Methyladipic acid	3-¼×»ù¼º¶þËá	5.747	C7H12O4	160.17	Fatty Acyls	Ö¬·¾õ£Àà	"3058-01-3"	214200	228600	195700	207300	199000	256000	0.9640646232825	-0.0527982383031	0.741666172332989	0.444444444444444	0.454754605423172
Com_6_neg	12(S)-HETE	12-ôÇ¶þÊ®ÍéËÄÏ©Ëá	13.03	C20H32O3	320.466	Eicosanoid	Ñõ»¯Ö¬ÖÊ	"54397-83-0"	3499	7992	2488	4054	3945	6832	0.942552761108489	-0.0853547167617	0.725302748505533	0.666666666666667	0.353897594606305
Com_70_neg	CTP	5'-ÈýÁ×Ëá°ûÜÕ	0.87	C9H16N3O14P3	483.156	Nucleotide And Its Derivates	ºËÜÕËá¼°ÆäÑÜÉúÎï	"65-47-4"	114400	128400	120700	146600	82400	118900	1.04484047139983	0.0632826851871	0.719629616817326	0.555555555555556	0.385651143801085
Com_71_neg	Prostaglandin H2	Ç°ÁÐÏÙËØH2	9.33	C20H32O5	352.465	Hormones	¼¤ËØ	"42935-17-1"	3965	16330	4938	3190	9141	38160	0.499752431126339	-1.00071450968	0.652788586879733	0.555555555555556	0.668474847124903
Com_72_neg	Prostaglandin D2	Ç°ÁÐÏÙËØD2	9.34	C20H32O5	352.465	Hormones	¼¤ËØ	"41598-07-6"	3879	16340	7639	3902	7361	39000	0.554244673019915	-0.85140509582	0.748602733800697	0.444444444444444	0.504606709816019
Com_73_neg	Phosphocreatine	¼¡ËáÁ×Ëá	0.91	C4H10N3O5P	211.113	Organic Acid And Its Derivatives	ÓÐ»úËá¼°ÆäÑÜÉúÎï	"67-07-2"	617500	54810	58850	231900	40040	59340	2.20707558560734	1.14213603837	0.6808578523545	0.444444444444444	0.421497248898655
Com_74_neg	L-Histidine	L-×é°±Ëá	0.76	C6H9N3O2	155.15	Amino Acid And Its Derivatives	°±»ùËá¼°ÆäÑÜÉúÎï	"71-00-1"	4157000	5506000	4560000	5190000	3871000	3861000	1.10068100913171	0.138396418744	0.485042841070436	0.777777777777778	0.681197774741562
Com_75_neg	D-threo-Isocitric acid	D-ËÕ°±Ëá-ÒìÄûÃÊËá	1.41	C6H8O7	192.124	Organic Acid And Its Derivatives	ÓÐ»úËá¼°ÆäÑÜÉúÎï	"6061-97-8"	187800	137200	17980	160700	116500	287100	0.607797270955166	-0.718337897797	0.385851653615872	0.666666666666667	1.28583549274134
Com_76_neg	Stearic acid	Ó²Ö¬Ëá	2.27	C18H36O2	284.477	Fatty Acyls	Ö¬·¾õ£Àà	"57-11-4"	644100	1255000	736600	830100	232100	376100	1.83251060279497	0.873821545729	0.19303387937511	0.777777777777778	1.3517446100488
Com_77_neg	3'-Dephospho-CoA	3'-Á×Ëá¸¨Ã¸A	4.47	C21H35N7O13P2S	687.554	Co-Enzyme Factor	¸¨Ã¸Òò×Ó	"3633-59-8"	9181	70530	18180	7221	42110	31460	1.2116572390489	0.276981638199	0.936120447572606	0.444444444444444	0.257632736418049
Com_78_neg	L-Homoserine	L-¸ßË¿°±Ëá	1.9	C4H9NO3	119.119	Amino Acid And Its Derivatives	°±»ùËá¼°ÆäÑÜÉúÎï	"672-15-1"	36940	48310	24310	18310	40450	31740	1.21060773480663	0.275731473847	0.544463932304169	0.666666666666667	0.367904597156991
Com_79_neg	DL-o-Tyrosine	DL-O-ÀÒ°±Ëá	1.81	C9H11NO3	181.189	Organic Acid And Its Derivatives	ÓÐ»úËá¼°ÆäÑÜÉúÎï	"2370-61-8"	4529000	6535000	3990000	6516000	2582000	3264000	1.21776411583886	0.284234706424	0.475958115159065	0.777777777777778	0.998136117566764
Com_80_neg	D-Lactic acid	D-ôÇ»ù±ûËá	1.44	C3H6O3	90.08	Organic Acid And Its Derivatives	ÓÐ»úËá¼°ÆäÑÜÉúÎï	"10326-41-7"	2157000	2548000	2385000	1783000	2332000	2019000	1.1558526247147	0.20895746086	0.193118639234229	0.888888888888889	1.76941672731521
Com_81_neg	Dihydroxyacetone phosphate	Á×Ëá¶þôÇ»ù±ûÍª	0.9	C3H7O6P	170.058	Carbohydrates And Its Derivatives	ÌÇÀà¼°ÆäÑÜÉúÎï	"57-04-5"	6886000	870400	502800	3630000	1671000	1260000	1.25883249504649	0.332086325437	0.744684231287069	0.666666666666667	0.33998927488033
Com_82_neg	Sucrose	D-ÕáÌÇ	0.99	C12H22O11	342.297	Carbohydrates And Its Derivatives	ÌÇÀà¼°ÆäÑÜÉúÎï	"57-50-1"	122800	55800	76780	91640	69590	32050	1.32129552980132	0.401953185505	0.467361910787566	0.666666666666667	0.957865250199142
Com_83_neg	D-Ribose 5-phophate	D-ºËÌÇ-5-Á×Ëá	0.89	C5H11O8P	230.11	Organic Acid And Its Derivatives	ÓÐ»úËá¼°ÆäÑÜÉúÎï	"207671-46-3"	1851000	5397000	3683000	2130000	1805000	2391000	1.72794815049004	0.789059928061	0.275158156629981	0.777777777777778	0.929127501963861
Com_84_neg	D-Xylulose 5-phosphate	D-Ä¾ÍªÌÇ-5-Á×Ëá	0.9	C5H11O8P	230.11	Carbohydrates And Its Derivatives	ÌÇÀà¼°ÆäÑÜÉúÎï	"4212-65-1"	2959000	10630000	7248000	3779000	3338000	4386000	1.81144049378423	0.857137413722	0.338451187270819	0.666666666666667	0.835169352910819
Com_85_neg	D-Xylonate	Ä¾ÌÇËá	0.91	C5H10O6	166.129	Organic Acid And Its Derivatives	ÓÐ»úËá¼°ÆäÑÜÉúÎï	"526-91-0"	1359000	1870000	1798000	2317000	1393000	1521000	0.96100172051233	-0.0573890809826	0.90514701132011	0.444444444444444	0.613750267024415
Com_86_neg	dUMP	ÍÑÑõÄòÜÕËá	0.92	C9H13N2O8P	308.182	Nucleotide And Its Derivates	ºËÜÕËá¼°ÆäÑÜÉúÎï	"964-26-1"	252700	62470	195300	67230	121000	193800	1.33620396303955	0.418140242847	0.695625227656123	0.666666666666667	0.600269836590813
Com_87_neg	Fosfomycin	Á×Ã¹ËØ	11.02	C3H7O4P	138.059	Organic Acid And Its Derivatives	ÓÐ»úËá¼°ÆäÑÜÉúÎï	"23155-02-4"	35700	39340	34910	40080	39560	40060	0.918546365914787	-0.122575548089	0.141032755027802	1	1.37420081729101
Com_88_neg	Ethylmalonate	ÒÒ»ù±û¶þËá	6.37	C5H8O4	132.115	Organic Acid And Its Derivatives	ÓÐ»úËá¼°ÆäÑÜÉúÎï	"601-75-2"	15880	18220	22460	14820	9039	12940	1.53699828799696	0.620115558067	0.0775983328851914	1	2.07291600314861
Com_89_neg	Thymidine 3,5-cyclic monophosphate	ÐØÜÕ3,5-»·µ¥Á×Ëá	4.2	C10H13N2O7P	304.193	Nucleotide And Its Derivates	ºËÜÕËá¼°ÆäÑÜÉúÎï	"6453-60-7"	24050	26630	29340	22160	27940	25790	1.05442087231519	0.0764508339635	0.575694965391582	0.666666666666667	0.799230521688496
Com_8_neg	1-Caffeoylquinic Acid	1-¿§·Èõ£¿üÄþËá	18.71	C16H18O9	354.309	Organic Acid And Its Derivatives	ÓÐ»úËá¼°ÆäÑÜÉúÎï	"1241-87-8"	2504000	2677000	2997000	3132000	3042000	2978000	0.893575174825175	-0.162338989252	0.151590483529902	0.888888888888889	0.969055037456796
Com_90_neg	Methylmalonate	¼×»ù±û¶þËá	1.938	C4H6O4	118.09	Organic Acid And Its Derivatives	ÓÐ»úËá¼°ÆäÑÜÉúÎï	"516-05-2"	8053000	8741000	5341000	3169000	8069000	5669000	1.30922103270835	0.388708684657	0.380781537335913	0.666666666666667	0.600416980465872
Com_91_neg	Dulcitol	¼ºÁù´¼	0.897	C6H14O6	182.17	Carbohydrates And Its Derivatives	ÌÇÀà¼°ÆäÑÜÉúÎï	"608-66-2"	23310	13940	11680	11760	16930	5882	1.41530718500521	0.501115216439	0.360535612256478	0.666666666666667	1.08872013382039
Com_92_neg	Gluconolactone	ÆÏÌÇËáÄÚõ¥	1.02	C6H10O6	178.14	Amino Acid And Its Derivatives	°±»ùËá¼°ÆäÑÜÉúÎï	"90-80-2"	30990	37370	27010	23080	36420	42820	0.932075840500391	-0.101480747023	0.836305018621325	0.555555555555556	0.42233636455941
Com_93_neg	Sebacic acid	¹ï¶þËá	8.111	C10H18O4	202.248	Organic Acid And Its Derivatives	ÓÐ»úËá¼°ÆäÑÜÉúÎï	"111-20-6"	352300	417100	359800	432600	444700	424200	0.867614291202459	-0.204874277842	0.104402301198542	1	1.69995496932588
Com_94_neg	Tiglic acid	Ìè¸÷Ëá	1.07	C5H8O2	100.116	Fatty Acyls	Ö¬·¾õ£Àà	"80-59-1"	668600	473400	501100	920300	664500	1250000	0.579617609707916	-0.786826667949	0.0833316975405792	0.888888888888889	2.11130776799267
Com_95_neg	4-Hydroxyphenylpyruvate	4-ôÇ±½»ù±ûÍªËá	1.38	C9H8O4	180.16	Benzene and substituted derivatives	±½¼°ÆäÈ¡´úÑÜÉúÎï	"156-39-8"	522300	354800	364400	457300	488000	355400	0.954486045975244	-0.0672039884572	0.752098679276827	0.555555555555556	0.275865956486111
Com_96_neg	Oxaloacetate	²Ýõ£ÒÒËá	0.71	C4H4O5	132.072	Organic Acid And Its Derivatives	ÓÐ»úËá¼°ÆäÑÜÉúÎï	"328-42-7"	2464000	3196000	2931000	2064000	4359000	3610000	0.856274294827071	-0.22385507817	0.670554529894717	0.666666666666667	0.773335290355318
Com_97_neg	Tetrahydroaldosterone	ËÄÇâÈ©çÞÍª	0.97	C21H32O5	364.476	Hormones	¼¤ËØ	"13489-75-3"	4872	4691	3767	5950	5447	7853	0.692467532467532	-0.530181665381	0.0625377098923306	1	0.911152341175018
Com_98_neg	Tolfenamic acid	ÍÐÃðËá	2.15	C14H12ClNO2	261.7	Benzoic Acid And Its Derivatives	±½¼×Ëá¼°ÆäÑÜÉúÎï	"13710-19-5"	164400	214900	109211	126900	102900	67660	1.64227459154172	0.715695368733	0.143208832632725	0.888888888888889	1.41169625981499
Com_99_neg	3-PRENYL-4-HYDROXYACETOPHENONE	3-ÒìÎìÏ©-4-ôÇ»ù±½ÒÒÍª	3.76	C13H16O2	204.26	Ketones	ÍªÀà	"26932-05-8"	140300	86260	159400	144600	67070	64610	1.39698856232807	0.482320208908	0.315899337803002	0.777777777777778	1.07567756835925
Com_9_neg	D-Glucose 6-phosphate	D-ÆÏÌÑÌÇ-6-Á×Ëá	0.92	C6H13O9P	260.136	Carbohydrates And Its Derivatives	ÌÇÀà¼°ÆäÑÜÉúÎï	"56-73-5"	433900000	533400000	276000000	330800000	343600000	121800000	1.56154232604873	0.642971674548	0.278929090460995	0.777777777777778	1.12673862391113
