# Supplementary material for: Association analysis of transcriptome and quasi-targeted metabolomics reveals the regulation mechanism underlying broiler muscle tissue development at different levels of dietary guanidinoacetic acid
Source: Frontiers journal article supplement (doi:10.3389/fvets.2024.1384028), 2024-04-25

# MetKEGGEnrichment Readme

**-- 5.MetKEGGEnrichment      【差异代谢物 KEGG 富集分析结果目录】**  
| -- \*.vs.\*      **【比较的样品对目录】**  
| |-- \*.vs.\*\_all.KEGG\_enrichment.xls      **【差异代谢物 KEGG 富集结果列表】**  
| |-- \*.vs.\*\_all.KEGG\_Enrich.scatterplot.{png,pdf}      **【KEGG 富集气泡图】**  
| |-- \*.vs.\*\_all\_KEGG\_map      **【KEGG 通路图】**

## \*.vs.\*\_all.KEGG\_enrichment.xls

第一列: MapID, 富集的 KEGG PATHWAY 的 ID;  
第二列: MapTitle, 富集的 KEGG PATHWAY 名称;  
第三列: Pvalue, 富集分析的 Pvalue;  
第四列: x, 与该通路相关的差异代谢物的数目;  
第五列: y, 与该通路相关的背景 (所有) 代谢物的数目;  
第六列: n, KEGG 注释的差异代谢物数目;  
第七列: N, KEGG 注释的背景 (所有) 代谢物的数目;  
第八列: EnrichDirect, 富集指向, Over 代表富集;  
第九列: MetaIDs, 富集到的代谢物 list;  
第十列: KEGG\_cpd\_id, KEGG 数据库代谢物的 ID;

## \*.vs.\*\_all.KEGG\_Enrich.scatterplot.{png,pdf}

KEGG 富集气泡图: 根据 KEGG 富集结果, 选取 P-value 值由小到大排序 Top20 的通路绘制气泡图。横坐标为 x/y (相应代谢通路中差异代谢物的数目/该通路中鉴定出总代谢物数目), 值越大, 表示该通路中差异代谢物富集程度越高, 纵坐标为 KEGG 通路名称。点的颜色代表超几何检验的 P-value 值, 值越小, 说明检验的可靠性越大、越具统计学意义。点的大小代表相应通路中差异代谢物的数目, 越大, 该通路内差异代谢物就越多。

## \*.vs.\*\_all\_KEGG\_map

KEGG 通路图解释说明:

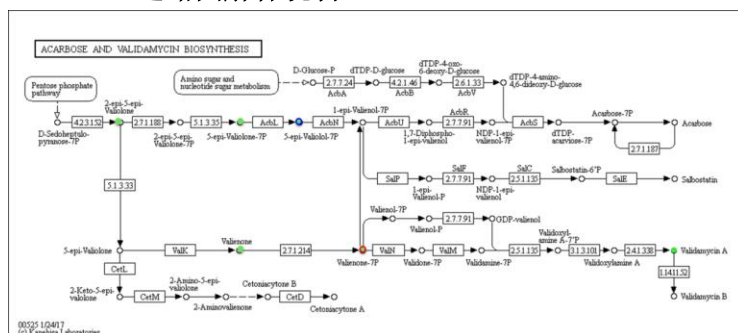

KEGG 富集通路图

KEGG PATHWAY Database (<https://www.genome.jp/KEGG/pathway.html>) 是根据相关知识手绘的代谢通路数据库, 目前分为以下几类: 1.新陈代谢、2.遗传信息加工、3.环境信息加工、4.细胞过程、5.生物体系统、6.人类疾病、7.药物开发

说明:

绿色: 注释到的代谢物

蓝色框: 下调差异代谢物

红色框：上调差异代谢物  
黄色圆圈：同时包含上下调的代谢物  
下方为图例解释，仅供参考；其他说明详见官网解释：  
[https://www.genome.jp/KEGG/document/help\\_pathway.html](https://www.genome.jp/KEGG/document/help_pathway.html)

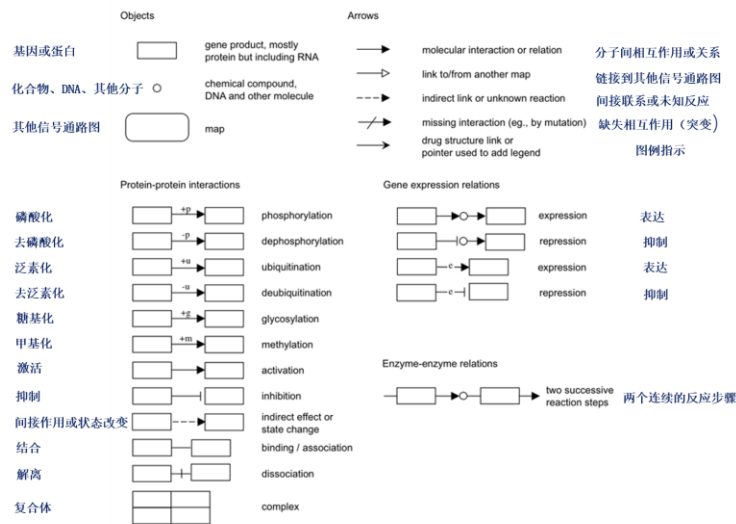

Supplement: Data_Sheet_1.ZIP [file Data_Sheet_1.ZIP]
