# Supplementary material for: Association analysis of transcriptome and quasi-targeted metabolomics reveals the regulation mechanism underlying broiler muscle tissue development at different levels of dietary guanidinoacetic acid
Source: Frontiers journal article supplement (doi:10.3389/fvets.2024.1384028), 2024-04-25
Supplement: Data_Sheet_1.ZIP [file Diff_Heatmap_Name_all.xls]

Compound_ID	Name	Control	No_GAA	High_GAA	QC
Com_10_neg	5'-Adenylic acid	5088333.33333	4496366.66667	668166.666667	3212000.0
Com_15_neg	L-Asparagine	129700.0	278466.666667	401966.666667	295100.0
Com_30_neg	Nonadecanoic acid	903133.333333	824400.0	607066.666667	828700.0
Com_36_neg	Phosphonotyrosine	127366.666667	94783.3333333	88430.0	113016.666667
Com_51_neg	Ala-trp	148103.333333	324366.666667	211566.666667	211000.0
Com_52_neg	N-Acetylglucosamine 1-phosphate	270100.0	241966.666667	412966.666667	288733.333333
Com_60_neg	3-Oxo-7alpha,12alpha-hydroxy-5beta-cholanoic acid	13170.0	11656.6666667	7465.33333333	24310.0
Com_83_neg	D-Ribose 5-phophate	2108666.66667	3643666.66667	7086333.33333	3346666.66667
Com_84_neg	D-Xylulose 5-phosphate	3834333.33333	6945666.66667	14862666.6667	6968666.66667
Com_92_neg	Gluconolactone	34106.6666667	31790.0	47386.6666667	38960.0
Com_95_neg	4-Hydroxyphenylpyruvate	433566.666667	413833.333333	281666.666667	391600.0
Com_97_neg	Tetrahydroaldosterone	6416.66666667	4443.33333333	12482.6666667	7750.33333333
Com_102_neg	2-Hydroxyisocaproic Acid	10086.3333333	17453.3333333	10693.3333333	13253.3333333
Com_133_neg	APS	19180000.0	8983333.33333	481833.333333	11506666.6667
Com_140_neg	Ribulose-5-phosphate	2215666.66667	3759333.33333	7266666.66667	3595333.33333
Com_144_neg	D-Mannose	125233.333333	112493.333333	60046.6666667	104126.666667
Com_148_neg	TPP	78930.0	89426.6666667	168266.666667	106743.333333
Com_158_neg	Ribose 1-phosphate	3762666.66667	6325000.0	14032000.0	6125666.66667
Com_159_neg	Sedoheptulose 7-phosphate	143966.666667	185533.333333	312600.0	179366.666667
Com_161_neg	dGDP	13971666.6667	7133666.66667	171433.333333	8714666.66667
Com_163_neg	D-Gluconic acid	99496.6666667	112236.666667	181866.666667	129333.333333
Com_164_neg	D-Glucarate	19230.0	23083.3333333	27913.3333333	20370.0
Com_173_neg	N-Acetyl-L-methionine	14070.0	17180.0	24223.3333333	16796.6666667
Com_178_neg	Pyridoxal 5-phosphate monohydrate	2609333.33333	2800333.33333	2099333.33333	2154666.66667
Com_186_neg	L(+)-Asparagine monohydrate	300700.0	575833.333333	851900.0	641566.666667
Com_197_neg	L-Cysteinesulfinic acid	11957.6666667	6613.66666667	31690.0	7095.0
Com_215_neg	Pyridoxal 5'-phosphate hydrate	164933.333333	159233.333333	125166.666667	127000.0
Com_220_neg	gamma-Linolenic acid	214966.666667	184866.666667	172133.333333	196433.333333
Com_222_neg	5-Hydroxyhexanoic Acid	59456.6666667	95973.3333333	67666.6666667	67873.3333333
Com_223_neg	Cis-4,7,10,13,16,19-Docosahexaenoic Acid(C22:6N3)	33633.3333333	45123.3333333	44363.3333333	43303.3333333
Com_226_neg	Adenosine 5'-Diphosphate	18376666.6667	9826000.0	355233.333333	12158333.3333
Com_227_neg	8,15-Dihete	3376.66666667	4976.0	4287.0	6153.33333333
Com_228_neg	5-Methyl-dl-tryptophan	54626.6666667	78463.3333333	197466.666667	100610.0
Com_242_neg	CDP	314366.666667	194773.333333	18374.6666667	134433.333333
Com_244_neg	UDP-D-glucuronate	371566.666667	344600.0	113430.0	258500.0
Com_247_neg	Glyceraldehyde 3-phosphate diethyl acetal	429900.0	582166.666667	654566.666667	520633.333333
Com_254_neg	D-Arabinose 5-phosphate	3447000.0	5474000.0	11783666.6667	5884000.0
Com_262_neg	Indoxylsulfuric acid	4725.66666667	5129.66666667	7742.0	4769.0
Com_263_neg	Glutaric Acid	2484333.33333	1561333.33333	2138333.33333	1687333.33333
Com_267_neg	NADH	1896333.33333	933833.333333	288533.333333	1255666.66667
Com_275_neg	Sorbitol	20623.3333333	27803.3333333	14186.6666667	16079.6666667
Com_277_neg	Taurohyodeoxycholic acid sodium salt	37206.6666667	13032.3333333	15251.0	20613.3333333
Com_288_neg	Methyl beta-D-galactopyranoside	6257.66666667	7677.33333333	12856.6666667	6806.0
Com_293_neg	IDP	2135666.66667	1364666.66667	475766.666667	1457333.33333
Com_296_neg	N-Acetyl-D-glucosamine 6-phosphate	94276.6666667	125980.0	222833.333333	140993.333333
Com_319_pos	Ectoine	1742333.33333	753066.666667	496133.333333	869533.333333
Com_334_pos	Isoquinoline	19586.6666667	29730.0	25713.3333333	26036.6666667
Com_371_pos	1D-chiro-Inositol	1060666.66667	1408333.33333	1486000.0	1336666.66667
Com_374_pos	L-Alanyl-L-leucine	128966.666667	205033.333333	491633.333333	265733.333333
Com_378_pos	Adenine	2796000.0	2790666.66667	583266.666667	1598333.33333
Com_392_pos	5-Hydroxyindoleacetate	37770.0	31486.6666667	55253.3333333	38413.3333333
Com_397_pos	SDMA	229833.333333	326433.333333	418400.0	360000.0
Com_409_pos	Mag (18:1)	18726.6666667	27413.3333333	28110.0	18713.3333333
Com_424_pos	S-Lactoyglutathione	202066.666667	164400.0	20183.6666667	286133.333333
Com_434_pos	Thymine	5070.0	22524.0	49610.0	362933.333333
Com_459_pos	Furfural	41626.6666667	57563.3333333	63993.3333333	53146.6666667
Com_469_pos	Asp-Phe methyl ester	105800.0	102183.333333	129933.333333	105666.666667
Com_489_pos	1-Aminocyclopropane-1-carboxylic acid	1369666.66667	1754333.33333	2073666.66667	1772000.0
Com_536_pos	N-Methylnicotinamine	13553.3333333	20720.0	24530.0	17583.3333333
Com_537_pos	Trigonelline	651866.666667	495233.333333	798466.666667	604100.0
Com_560_pos	Cytidine-5-Triphosphate	3175.0	9055.33333333	6187.33333333	5432.0
Com_562_pos	dAMP	3817333.33333	3553000.0	2728333.33333	3221666.66667
Com_582_pos	Stachydrine	2843000.0	2133000.0	2136333.33333	2374000.0
Com_587_pos	Adipamide	24486.6666667	16576.6666667	14163.3333333	13943.0
Com_589_pos	Adenylocuccinic Acid	335033.333333	393800.0	19842.0	136710.0
Com_599_pos	L-Leucyl-L-alanine Hydrate	129283.333333	221533.333333	683133.333333	331100.0
Com_646_pos	Phe-Pro	90296.6666667	118236.666667	251533.333333	148333.333333
Com_650_pos	4-Acetamidobutanoate	250866.666667	122846.666667	39980.0	130400.0
Com_651_pos	Val-Ser	89966.6666667	77830.0	189333.333333	113800.0
Com_654_pos	beta-Nicotinamide mononucleotide	479733.333333	508900.0	871666.666667	535933.333333
Com_663_pos	S-Methyl-L-cysteine	2008666.66667	1999333.33333	547266.666667	1197666.66667
Com_672_pos	3-OH-anthranilate	199633.333333	319133.333333	368500.0	323966.666667
Com_673_pos	3-Methoxytyramine	199800.0	190433.333333	247466.666667	177666.666667
