# Supplementary material for: Association analysis of transcriptome and quasi-targeted metabolomics reveals the regulation mechanism underlying broiler muscle tissue development at different levels of dietary guanidinoacetic acid
Source: Frontiers journal article supplement (doi:10.3389/fvets.2024.1384028), 2024-04-25
Supplement: Data_Sheet_1.ZIP [file Diff_Venn_Intersection_all.xls]

ID	Name	No_GAA.vs.Control	High_GAA.vs.Control	High_GAA.vs.No_GAA
