# Supplementary material for: Association analysis of transcriptome and quasi-targeted metabolomics reveals the regulation mechanism underlying broiler muscle tissue development at different levels of dietary guanidinoacetic acid
Source: Frontiers journal article supplement (doi:10.3389/fvets.2024.1384028), 2024-04-25
Supplement: Data_Sheet_1.ZIP [file Diff_Venn_Union_all.xls]

ID	Name	No_GAA.vs.Control	High_GAA.vs.Control	High_GAA.vs.No_GAA
Com_10_neg	5'-Adenylic acid	0	1	0
Com_378_pos	Adenine	0	1	1
Com_228_neg	5-Methyl-dl-tryptophan	0	1	0
Com_36_neg	Phosphonotyrosine	1	1	0
Com_262_neg	Indoxylsulfuric acid	0	1	0
Com_469_pos	Asp-Phe methyl ester	0	0	1
Com_164_neg	D-Glucarate	0	1	0
Com_242_neg	CDP	0	1	1
Com_254_neg	D-Arabinose 5-phosphate	0	1	0
Com_84_neg	D-Xylulose 5-phosphate	0	1	0
Com_673_pos	3-Methoxytyramine	0	0	1
Com_140_neg	Ribulose-5-phosphate	0	1	0
Com_161_neg	dGDP	0	1	1
Com_173_neg	N-Acetyl-L-methionine	0	1	1
Com_587_pos	Adipamide	0	1	0
Com_599_pos	L-Leucyl-L-alanine Hydrate	0	1	0
Com_244_neg	UDP-D-glucuronate	0	1	0
Com_220_neg	gamma-Linolenic acid	0	1	0
Com_275_neg	Sorbitol	0	0	1
Com_133_neg	APS	0	1	1
Com_222_neg	5-Hydroxyhexanoic Acid	1	0	1
Com_319_pos	Ectoine	1	1	0
Com_159_neg	Sedoheptulose 7-phosphate	0	1	1
Com_277_neg	Taurohyodeoxycholic acid sodium salt	1	1	0
Com_374_pos	L-Alanyl-L-leucine	0	1	0
Com_646_pos	Phe-Pro	0	1	1
Com_30_neg	Nonadecanoic acid	0	1	1
Com_654_pos	beta-Nicotinamide mononucleotide	0	1	0
Com_92_neg	Gluconolactone	0	0	1
Com_51_neg	Ala-trp	0	0	1
Com_144_neg	D-Mannose	0	1	0
Com_223_neg	Cis-4,7,10,13,16,19-Docosahexaenoic Acid(C22:6N3)	0	1	0
Com_15_neg	L-Asparagine	0	1	0
Com_60_neg	3-Oxo-7alpha,12alpha-hydroxy-5beta-cholanoic acid	0	1	1
Com_650_pos	4-Acetamidobutanoate	0	1	0
Com_288_neg	Methyl beta-D-galactopyranoside	0	1	1
Com_589_pos	Adenylocuccinic Acid	0	1	1
Com_397_pos	SDMA	0	1	0
Com_215_neg	Pyridoxal 5'-phosphate hydrate	0	1	0
Com_97_neg	Tetrahydroaldosterone	0	0	1
Com_263_neg	Glutaric Acid	1	0	0
Com_163_neg	D-Gluconic acid	0	1	0
Com_247_neg	Glyceraldehyde 3-phosphate diethyl acetal	0	1	0
Com_178_neg	Pyridoxal 5-phosphate monohydrate	0	1	0
Com_158_neg	Ribose 1-phosphate	0	1	0
Com_95_neg	4-Hydroxyphenylpyruvate	0	1	0
Com_226_neg	Adenosine 5'-Diphosphate	0	1	1
Com_651_pos	Val-Ser	0	1	1
Com_672_pos	3-OH-anthranilate	0	1	0
Com_227_neg	8,15-Dihete	1	0	0
Com_434_pos	Thymine	0	1	0
Com_102_neg	2-Hydroxyisocaproic Acid	0	0	1
Com_560_pos	Cytidine-5-Triphosphate	1	0	0
Com_267_neg	NADH	0	1	0
Com_582_pos	Stachydrine	1	0	0
Com_489_pos	1-Aminocyclopropane-1-carboxylic acid	0	1	0
Com_83_neg	D-Ribose 5-phophate	0	1	0
Com_334_pos	Isoquinoline	1	0	0
Com_148_neg	TPP	0	1	0
Com_424_pos	S-Lactoyglutathione	0	1	0
Com_537_pos	Trigonelline	1	0	1
Com_409_pos	Mag (18:1)	0	1	0
Com_186_neg	L(+)-Asparagine monohydrate	0	1	0
Com_197_neg	L-Cysteinesulfinic acid	0	0	1
Com_459_pos	Furfural	0	1	0
Com_663_pos	S-Methyl-L-cysteine	0	1	1
Com_293_neg	IDP	0	0	1
Com_371_pos	1D-chiro-Inositol	1	1	0
Com_536_pos	N-Methylnicotinamine	0	1	0
Com_392_pos	5-Hydroxyindoleacetate	0	0	1
Com_562_pos	dAMP	0	1	0
Com_52_neg	N-Acetylglucosamine 1-phosphate	0	0	1
Com_296_neg	N-Acetyl-D-glucosamine 6-phosphate	0	0	1
