# Supplementary material for: Association analysis of transcriptome and quasi-targeted metabolomics reveals the regulation mechanism underlying broiler muscle tissue development at different levels of dietary guanidinoacetic acid
Source: Frontiers journal article supplement (doi:10.3389/fvets.2024.1384028), 2024-04-25
Supplement: Data_Sheet_1.ZIP [file High_GAA.vs.Control_all.xls]

Compound_ID	Name	Chinese name	RT [min]	Formula	Molecular Weight	Class(English)	Class(Chinese)	CAS	all_High_GAA_1	all_High_GAA_2	all_High_GAA_3	all_NC_1	all_NC_2	all_NC_3	FC	log2FC	Pvalue	ROC	VIP
Com_100_neg	alpha-Benzylsuccinic acid	¦Á-ÜÐ»ù¶¡¶þËá	0.71	C11H12O4	208.211	Organic Acid And Its Derivatives	ÓÐ»úËá¼°ÆäÑÜÉúÎï	"884-33-3"	234100	210300	225300	231300	203400	229500	1.00828063836194	0.0118972452094	0.872214559319923	0.444444444444444	0.115160286627835
Com_101_neg	6-Sialyllactose	6'-ÍÙÒºÈéÌÇ	0.73	C23H39NO19	633.551	Carbohydrates And Its Derivatives	ÌÇÀà¼°ÆäÑÜÉúÎï	"35890-39-2"	48080	22720	25550	24180	43160	30110	0.988712160082094	-0.0163775189622	0.897959045584864	0.555555555555556	0.50311891871684
Com_102_neg	2-Hydroxyisocaproic Acid	2-ôÇ»ù-4-¼×»ùÎìËá	6.39	C6H12O3	132.158	Fatty Acyls	Ö¬·¾õ£Àà	"498-36-2"	9470	10280	12330	13190	6589	10480	1.06018044218249	0.0843098316632	0.70635264120559	0.555555555555556	0.36187413183945
Com_103_neg	Trehalose 6-phosphate	º£ÔåÌÇ-6-Á×Ëá	0.96	C12H23O14P	422.276	Carbohydrates And Its Derivatives	ÌÇÀà¼°ÆäÑÜÉúÎï	"4484-88-2"	268200	41590	102700	253300	351700	34270	0.6452516151235	-0.632066247367	0.737820271743845	0.555555555555556	0.434566561340769
Com_104_neg	Citicoline	°û¶þÁ×µ¨¼î	0.89	C14H26N4O11P2	488.324	Pyrimidines and pyrimidine derivatives	à×à¤¼°ÆäÑÜÉúÎï	"987-78-0"	33880	27360	54570	56090	31420	51970	0.830298250645254	-0.268298436215	0.50958818619789	0.666666666666667	0.555284392399638
Com_105_neg	Homotaurine	3-°±»ù±ûÍé»ÇËá	0.84	C3H9NO3S	139.17	Organic Acid And Its Derivatives	ÓÐ»úËá¼°ÆäÑÜÉúÎï	"3687-18-1"	8745	26130	22770	27840	16140	31040	0.768395094641429	-0.380079785878	0.466723256938618	0.777777777777778	0.814990480130212
Com_106_neg	Allitol	ËâÌÇ´¼	0.91	C6H14O6	182.172	Sugar Alcohols	ÌÇ´¼	"488-44-8"	10750	5669	14720	9309	21530	13920	0.695703657364999	-0.523455189809	0.366474237646526	0.666666666666667	0.6980725109274
Com_107_neg	scyllo-Inositol	ÇàÐ·¼¡´¼	0.853	C6H12O6	180.16	Carbohydrates And Its Derivatives	ÌÇÀà¼°ÆäÑÜÉúÎï	"488-59-5"	416600	700700	602900	430400	317000	494900	1.38468968848104	0.469562701871	0.192427860580023	0.777777777777778	1.25773829645444
Com_108_neg	Succinic acid	çúçêËá	1.936	C4H6O4	118.09	Tca Cycle	ÈýôÈËáÑ­»·	"110-15-6"	6605000	12530000	2105000	7679000	18880000	12910000	0.538143859738022	-0.89393620094	0.26956851542965	0.888888888888889	1.06473470361843
Com_109_neg	Thymidine	ÐØÜÕ	4.289	C10H14N2O5	242.23	Nucleotide And Its Derivates	ºËÜÕËá¼°ÆäÑÜÉúÎï	"50-89-5"	10880	5713	12270	9227	8875	12750	0.935530921820303	-0.0961427556709	0.718810238269779	0.444444444444444	0.388273025244026
Com_10_neg	5'-Adenylic acid	5'-ÏÙàÑßÊºËÜÕËá	1.036	C10H14N5O7P	347.221	Nucleotide And Its Derivates	ºËÜÕËá¼°ÆäÑÜÉúÎï	"61-19-8"	857200	700600	446700	1780000	6859000	6626000	0.131313462168359	-2.92891326694	0.0347814115146492	1	1.50383520878074
Com_110_neg	Cytosine	°ûà×à¤	0.875	C4H5N3O	111.1	Nucleotide And Its Derivates	ºËÜÕËá¼°ÆäÑÜÉúÎï	"71-30-7"	40650	83290	42680	62850	59610	39580	1.02826462601827	0.0402115928536	0.976663218575018	0.444444444444444	0.0553081993768734
Com_111_neg	Xanthurenic Acid	»ÆÄòËá	4.977	C10H7NO4	205.17	Organic Acid And Its Derivatives	ÓÐ»úËá¼°ÆäÑÜÉúÎï	"59-00-7"	329800	239100	293500	266200	159000	190100	1.40159271899886	0.487067185551	0.132605395548548	0.888888888888889	1.41608004381244
Com_112_neg	cis-Aconitic acid	Ë³Ê½ÎÚÍ·Ëá	1.766	C6H6O6	174.11	Tca Cycle	ÈýôÈËáÑ­»·	"585-84-2"	35140	45060	22040	26950	29640	54670	0.918928635628258	-0.121975269307	0.818534043068338	0.444444444444444	0.235315443994415
Com_113_neg	Riboflavin-5-phosphate	2,6-Ýì¶þ·Ó	5.52	C17H21N4O9P	456.344	Nucleotide And Its Derivates	ºËÜÕËá¼°ÆäÑÜÉúÎï	"146-17-8"	10170	8541	6682	9106	7695	11320	0.902990647558764	-0.147217049363	0.563232311742738	0.666666666666667	0.42357030208632
Com_114_neg	D-Glucopyranose	¦Â-D-ÆÏÌÑÌÇ	0.87	C6H12O6	180.156	Carbohydrates And Its Derivatives	ÌÇÀà¼°ÆäÑÜÉúÎï	"28905-12-6"	166600	184000	149800	153600	157100	180200	1.01935221022612	0.0276526227998	0.826542671014263	0.555555555555556	0.258679565220592
Com_115_neg	Prostaglandin I2	Ç°ÁÐÏÙËØI2	9.35	C20H32O5	352.465	Hormones	¼¤ËØ	"35121-78-9"	14950	25490	5831	5754	11370	52460	0.664966084157277	-0.588647335425	0.863478450458463	0.555555555555556	0.196376231174464
Com_116_neg	Pyruvic Acid	±ûÍªËá	1.78	C3H4O3	88.062	Tca Cycle	ÈýôÈËáÑ­»·	"127-17-3"	21510	23260	21550	23570	35310	19950	0.841304072053787	-0.249300767703	0.486200775942133	0.666666666666667	0.668546328019237
Com_117_neg	Pyrophosphate	½¹Á×Ëá	0.97	H4O7P2	177.975	Others	ÆäËü	"2466-09-3"	61590000	84620000	82290000	58720000	32380000	68300000	1.43350062735257	0.519542535955	0.216234876006158	0.888888888888889	1.2410137966861
Com_118_neg	Prostaglandin G2	Ç°ÁÐÏÙËØG2	2.69	C20H32O6	368.465	Hormones	¼¤ËØ	"51982-36-6"	322200	460600	190100	297800	372400	196300	1.12279284477784	0.167091775129	0.800613578058917	0.555555555555556	0.206929686704975
Com_119_neg	Phosphopyruvic acid	Á×Ï©´¼±ûÍªËá	1.03	C3H5O6P	168.042	Organic Acid And Its Derivatives	ÓÐ»úËá¼°ÆäÑÜÉúÎï		1155000	125700	66030	363800	310924	310800	1.3665116222436	0.4504977301	0.667055521831745	0.666666666666667	0.528830646350713
Com_11_neg	UMP	ÄòÜÕ-5-µ¥Á×Ëá	1.037	C9H13N2O9P	324.181	Nucleotide And Its Derivates	ºËÜÕËá¼°ÆäÑÜÉúÎï	"58-97-9"	16240000	17290000	20140000	1843000	9908000	13000000	2.16839723647529	1.11662907339	0.224811829796539	1	0.784422270682139
Com_120_neg	1-Dodecanol	Ê®¶þ´¼	6.18	C12H26O	186.33	Fatty Acyls	Ö¬·¾õ£Àà	"112-53-8"	34160	75620	95580	30030	29610	35520	2.15804960067255	1.10972802415	0.154520993783494	0.888888888888889	1.47542053217051
Com_121_neg	Succinic anhydride	¶¡¶þËáôû	1.02	C4H4O3	100.07	Organic Acid And Its Derivatives	ÓÐ»úËá¼°ÆäÑÜÉúÎï	"108-30-5"	502100	560700	653400	815700	688500	1131000	0.651259866423801	-0.618694770862	0.0861909546570274	1	1.49458622841913
Com_122_neg	Hydantoin-5-propionic acid	ÒÒÄÚõ£ëå-5-±ûËá	2.18	C6H8N2O4	172.14	Organoheterocyclic compounds	ÓÐ»úÔÓ»·»¯ºÏÎï	"5624-26-0"	2395000	750400	1350000	1710000	2059000	1533000	0.847868728781592	-0.238087177971	0.513304103507835	0.666666666666667	0.48693039720449
Com_123_neg	Indoleacetaldehyde	ßÅßáÒÒÈ©	6.92	C10H9NO	159.18	Organoheterocyclic compounds	ÓÐ»úÔÓ»·»¯ºÏÎï	"2591-98-2"	6423	2295	2611	4626	3389	1753	1.15980753480753	0.213885416028	0.80796889863789	0.444444444444444	0.404139976202829
Com_124_neg	Dimethylmalonic acid	¶þ¼×»ù±û¶þËá	0.68	C5H8O4	132.11	Organic Acid And Its Derivatives	ÓÐ»úËá¼°ÆäÑÜÉúÎï	"595-46-0"	734600	1054000	1042000	781900	1356000	969000	0.911068911133284	-0.134367914636	0.708326176278626	0.444444444444444	0.352728568971778
Com_125_neg	Glucotropaeolin	½ðÁ«ÆÏÌÇÁòÜÕ	0.98	C14H19NO9S2	409.4	Carbohydrates And Its Derivatives	ÌÇÀà¼°ÆäÑÜÉúÎï	"499-26-3"	101600	71160	70150	100800	108500	131700	0.712346041055718	-0.48934985589	0.0845322628685626	0.888888888888889	1.41604075092724
Com_126_neg	Diflunisal	¶þ·úÄáÁø	13.67	C13H8F2O3	250.2	Benzene and substituted derivatives	±½¼°ÆäÈ¡´úÑÜÉúÎï	"22494-42-4"	232000	221200	238800	220200	226600	224300	1.03114289971688	0.0442442807438	0.308000199859533	0.777777777777778	1.09935222118045
Com_127_neg	Hexadecanedioate	Ê®ÁùÍé¶þËá	11.86	C16H30O4	286.41	Fatty Acyls	Ö¬·¾õ£Àà	"505-54-4"	50200	85250	62490	54840	41260	62530	1.24780936771103	0.319397545366	0.343931155129654	0.666666666666667	0.80104526002486
Com_128_neg	Hydroxyhydroquinone	Æ«±½Èý·Ó	0.92	C6H6O3	126.11	Phenols And Its Derivatives	·ÓÀà¼°ÆäÑÜÉúÎï	"533-73-3"	118100	149500	144100	116200	104900	125100	1.18919699595609	0.249987723955	0.137016302774888	0.888888888888889	0.9955798335756
Com_129_neg	3-Phosphoglyceric acid	3-Á×Ëá¸ÊÓÍËá	1.03	C3H8NaO6P	194.056	Carbohydrates And Its Derivatives	ÌÇÀà¼°ÆäÑÜÉúÎï	"17603-42-8"	3733000	110100	103400	449400	199700	181600	4.75081256771398	2.24817428969	0.815547341494377	0.666666666666667	0.385473356813807
Com_12_neg	L-Threonine	L-ËÕ°±Ëá	0.888	C4H9NO3	119.12	Amino Acid And Its Derivatives	°±»ùËá¼°ÆäÑÜÉúÎï	"72-19-5"	73580	31210	84930	88850	34130	59510	1.03961860923886	0.0560543634864	0.953612809810035	0.444444444444444	0.170486298668892
Com_130_neg	5,6-Dihydroxyindole-2-Carboxylic Acid	5,6-¶þôÇ»ùßÅßá-2-ôÈËá	18.52	C9H7NO4	193.156	Indole And Its Derivatives	ßÅßá¼°ÆäÑÜÉúÎï	"4790-08-3"	96510	103700	102400	122300	115900	114400	0.858224617129892	-0.220572811254	0.00722722697875632	1	1.68794929465399
Com_131_neg	4-Pyridoxic acid	4-ßÁà¤Ëá	2.94	C8H9NO4	183.161	Pyridine And Its Derivatives	ßÁà¤¼°ÆäÑÜÉúÎï	"82-82-6"	108500	312900	525400	630200	64310	73420	1.23292487596526	0.302084896761	0.538387226675923	0.666666666666667	0.768665822385763
Com_132_neg	ARCAR	5-°±»ùßäßò-4-¼×õ£°·-1-¦Â-D-ß»à«ºËÌÇÜÕ5-Ò»Á×ËáÑÎ	1.06	C9H15N4O8P	338.211	Nucleotide And Its Derivates	ºËÜÕËá¼°ÆäÑÜÉúÎï	"3031-94-5"	714200	1219000	1242000	1057000	631300	1213000	1.09440595595078	0.130147986759	0.73806784963625	0.777777777777778	0.616318922467783
Com_133_neg	APS	5'-ÏÙÜÕËáÁòËá(APS)	1.05	C10H14N5O10PS	427.284	Nucleotide And Its Derivates	ºËÜÕËá¼°ÆäÑÜÉúÎï	"485-84-7"	399300	418100	628100	33390000	12660000	11490000	0.0251216545012165	-5.31492470715	0.00361742145670524	1	1.99910382260712
Com_134_neg	5-Phosphoribosyl 1-pyrophosphate	5-Á×ËáºËÌÇ»ù-1-½¹Á×Ëá	1.01	C5H13O14P3	196.25	Carbohydrates And Its Derivatives	ÌÇÀà¼°ÆäÑÜÉúÎï	"97-55-2"	19880	41650	28330	48940	39460	127700	0.415826006478482	-1.26594810522	0.151243312332749	0.888888888888889	0.771912112615321
Com_135_neg	2-Phenylbutyric acid	2-±½»ù¶¡Ëá	1.83	C10H12O2	164.2	Benzene and substituted derivatives	±½¼°ÆäÈ¡´úÑÜÉúÎï	"90-27-7"	441200	336900	389300	363600	137900	119900	1.87866108786611	0.90970482676	0.157460948920674	0.888888888888889	1.50410546189777
Com_136_neg	Galactaric acid	Õ³Ëá	0.9	C6H10O8	210.14	Sugar Acids And Its Derivatives	ÌÇËá¼°ÆäÑÜÉúÎï	"526-99-8"	83750	54630	88550	57650	66190	66750	1.19067107403327	0.251774920002	0.420623596175598	0.666666666666667	0.51733037644956
Com_137_neg	6-keto PGE1	6-ÍªPGE1	0.9	C20H32O6	368.5	Eicosanoid	Ñõ»¯Ö¬ÖÊ	"67786-53-2"	49180	95520	18650	12290	13300	18300	3.7218045112782	1.89600227947	0.133467352235899	1	1.39370420984234
Com_138_neg	Pimelic acid	¸ý¶þËá	5.77	C7H12O4	160.17	Fatty Acyls	Ö¬·¾õ£Àà	"111-16-0"	361200	226800	268100	372200	235200	272900	0.972509371805067	-0.0402159418666	0.890874970223527	0.666666666666667	0.125837790972103
Com_139_neg	Palmitaldehyde	×ØéµÈ©	10.19	C16H32O	240.42	Fatty Acyls	Ö¬·¾õ£Àà	"629-80-1"	934400	980600	1165000	850000	843500	926700	1.17548278757347	0.233253413968	0.127552857512669	1	1.49270565354182
Com_13_neg	Deoxyguanosine	ÍÑÑõÄñÜÕ	3.181	C10H13N5O4	267.241	Nucleotide And Its Derivates	ºËÜÕËá¼°ÆäÑÜÉúÎï	"961-07-9"	64240	57580	121800	64930	58830	64290	1.29550651422494	0.373516269873	0.478555218805889	0.555555555555556	0.651807484218099
Com_140_neg	Ribulose-5-phosphate	ºËÍªÌÇ-5-Á×Ëá	0.93	C5H11O8P	230.02	Carbohydrates And Its Derivatives	ÌÇÀà¼°ÆäÑÜÉúÎï		4064000	9363000	8373000	2206000	1913000	2528000	3.27967504137205	1.71355287599	0.0397143852283716	1	1.7798557155771
Com_141_neg	Taurocholic acid	Å£»Çµ¨Ëá	8.09	C26H45NO7S	515.7	Bile Acids	µ¨Ö­Ëá	"81-24-3"	42160	24260	10680	16530	15820	80660	0.682240509689408	-0.551647673866	0.760392821884845	0.444444444444444	0.337911752317241
Com_142_neg	Cytidine 5'-Monophosphate-N-Acetylneuraminic Acid	CMP-ÍÙÒºËáµ¥ÄÆÑÎ	1.11	C20H30N4NaO16P	636.433	Pyrimidines and pyrimidine derivatives	à×à¤¼°ÆäÑÜÉúÎï	"3063-71-6"	47320	25890	35380	22490	10430	26670	1.82228561839235	0.865749099614	0.143597241606602	0.888888888888889	1.01070347845009
Com_143_neg	Dl-2-Amino-3-phosphonopropionic acid	DL-2-°±»ù-3-Á×±ûËá	18.32	C3H8NO5P	169.073	Amino Acid And Its Derivatives	°±»ùËá¼°ÆäÑÜÉúÎï	"20263-06-3"	60510	58010	58810	53150	51460	52150	1.13121969890278	0.17787914837	0.00185475073946408	1	1.82150992069688
Com_144_neg	D-Mannose	D-¸ÊÂ¶ÌÇ	1.41	C6H12O6	180.156	Carbohydrates And Its Derivatives	ÌÇÀà¼°ÆäÑÜÉúÎï	"3458-28-4"	60730	62660	56750	163200	119600	92900	0.479478307159968	-1.06046254943	0.0450766569818365	1	1.36215401077191
Com_145_neg	dTMP	¶þÁ×ËáÍÑÑõÐØÜÕ	2.14	C10H15N2O8P	322.208	Nucleotide And Its Derivates	ºËÜÕËá¼°ÆäÑÜÉúÎï	"365-07-1"	64140	65420	66930	24680	74030	42450	1.39196656276566	0.47712455579	0.308750071854094	0.666666666666667	0.891711630284409
Com_146_neg	N-acetyl-L-ornithine	N-ÒÒõ£-L-Äñ°±Ëá	0.896	C7H14N2O3	174.198	Amino Acid And Its Derivatives	°±»ùËá¼°ÆäÑÜÉúÎï	"6205-08-9"	283300	273800	200300	157100	154200	164000	1.59351988217968	0.672217019582	0.0507270193323551	1	1.67844915413813
Com_147_neg	Aminomalonic acid	°±»ù±û¶þËá	0.88	C3H5NO4	119.08	Organic Acid And Its Derivatives	ÓÐ»úËá¼°ÆäÑÜÉúÎï	"1068-84-4"	86360	50260	84950	109900	45300	46810	1.09682688975793	0.133335845709	0.680839699687497	0.666666666666667	0.340039532255499
Com_148_neg	TPP	½¹Á×ËáÁò°·ËØ	0.915	C12H19ClN4O7P2S	460.77	Co-Enzyme Factor	¸¨Ã¸Òò×Ó	"154-87-0"	219400	146300	139100	100200	69980	66610	2.13184678407027	1.09210375526	0.0180753705737971	1	1.53501662847369
Com_149_neg	Homoarginine	¸ß¾«°±Ëá	0.807	C7H16N4O2	188.23	Amino Acid And Its Derivatives	°±»ùËá¼°ÆäÑÜÉúÎï	"156-86-5"	239400	257000	123600	216800	163200	79200	1.35017421602787	0.433145573486	0.433094609552303	0.777777777777778	0.854578370264114
Com_14_neg	Trehalose	º£ÔåÌÇ	0.962	C12H22O11	342.296	Carbohydrates And Its Derivatives	ÌÇÀà¼°ÆäÑÜÉúÎï	"99-20-7"	144200	109600	59370	118400	101000	69440	1.08423348566681	0.116675469184	0.901966782017463	0.555555555555556	0.300879146894263
Com_150_neg	Creatine phosphate disodium salt	Á×Ëá¼¡Ëá	0.93	C4H8N3Na2O5P	255.08	Organic Acid And Its Derivatives	ÓÐ»úËá¼°ÆäÑÜÉúÎï	"922-32-7"	2451000	1061000	124200	443700	93120	115200	5.57682279684672	2.47944343017	0.256583268715608	0.888888888888889	1.03384452440026
Com_151_neg	Tetradecanedioic acid	Ê®ËÄÍé¶þËá	10.673	C14H26O4	258.35	Fatty Acyls	Ö¬·¾õ£Àà	"821-38-5"	72560	73790	75480	71170	68540	71860	1.0484945880796	0.0683194148242	0.064733740337239	1	1.29519854990247
Com_152_neg	Taurine	Å£»ÇËá	0.865	C2H7NO3S	125.15	Organic Acid And Its Derivatives	ÓÐ»úËá¼°ÆäÑÜÉúÎï	"107-35-7"	16940000	49380000	48050000	32410000	16860000	53520000	1.1126568732367	0.154008755661	0.837931557779461	0.555555555555556	0.452054212743254
Com_153_neg	N-Acetyl-DL-phenylalanine	N-ÒÒõ£-DL-±½±û°±Ëá	6.85	C11H13NO3	207.226	Amino Acid And Its Derivatives	°±»ùËá¼°ÆäÑÜÉúÎï	"2901-75-9"	81580	53720	71620	122500	62000	82990	0.773561628472092	-0.370411861326	0.38432626390947	0.777777777777778	0.900578109341291
Com_154_neg	Sulfoacetic acid	»Ç»ùÒÒËá	0.95	C2H4O5S	140.115	Organic Acid And Its Derivatives	ÓÐ»úËá¼°ÆäÑÜÉúÎï	"123-43-3"	89630	92260	132500	63420	75260	69630	1.50924103499592	0.59382323146	0.0718411786012133	1	1.63166750736731
Com_155_neg	Thymidine 5'-diphosphate	ÐØÜÕ-5¡¯-¶þÁ×Ëá	0.69	C10H16N2O11P2	402.188	Nucleotide And Its Derivates	ºËÜÕËá¼°ÆäÑÜÉúÎï		56030	58440	55140	38470	50580	37640	1.3387796984766	0.420918578986	0.0825761158893219	1	1.54558007575109
Com_156_neg	UDP-N-Acetyl-Alpha-D-Mannosamine	¶þÁ×ËáÄòÜÕ-N-ÒÒõ£°±»ùÆÏÌÑÌÇ	0.96	C17H27N3O17P2	607.354	Nucleotide And Its Derivates	ºËÜÕËá¼°ÆäÑÜÉúÎï	"26575-17-7"	15440000	14990000	11970000	18070000	9570000	25590000	0.796543302648882	-0.328175301475	0.647361179779352	0.666666666666667	0.525762498875695
Com_157_neg	Uric Acid	ÄòËá	1.14	C5H4N4O3	168.11	Organic Acid And Its Derivatives	ÓÐ»úËá¼°ÆäÑÜÉúÎï	"69-93-2"	1012000	798500	1237000	1160000	441600	1989000	0.848743942516571	-0.236598722004	0.990009434962174	0.555555555555556	0.292695544172065
Com_158_neg	Ribose 1-phosphate	ºËÌÇ1-Á×Ëá	0.9	C5H11O8P	230.11	Carbohydrates And Its Derivatives	ÌÇÀà¼°ÆäÑÜÉúÎï	"14075-00-4"	7396000	17310000	17390000	3862000	3138000	4288000	3.72927002126152	1.89889326057	0.0374847835452308	1	1.72260463320068
Com_159_neg	Sedoheptulose 7-phosphate	7-Á×Ëá¾°Ìì¸ýÌÇ	0.87	C7H13BaO10P	425.473	Carbohydrates And Its Derivatives	ÌÇÀà¼°ÆäÑÜÉúÎï	"2646-35-7"	279800	356400	301600	122700	133600	175600	2.17133595739755	1.11858296251	0.00594575857351572	1	1.95756920653762
Com_15_neg	L-Asparagine	L-Ìì¶¬ÃÅõ£°·	0.843	C4H8N2O3	132.12	Amino Acid And Its Derivatives	°±»ùËá¼°ÆäÑÜÉúÎï	"70-47-3"	236400	402800	566700	159300	109100	120700	3.09920328964277	1.6318973904	0.0349569563490588	1	1.75807125634178
Com_160_neg	Sedoheptulose 1,7-bisphosphate	1,7-¶þÁ×Ëá»¯¾°Ìì¸ýÍªÌÇ	0.88	C7H16O13P2	370.142	Organic Acid And Its Derivatives	ÓÐ»úËá¼°ÆäÑÜÉúÎï	"815-91-8"	374839	197300	122700	161500	3450000	2458000	0.114480434961694	-3.12682703626	0.220474790827728	0.777777777777778	1.17526137672186
Com_161_neg	dGDP	¶þÁ×ËáÍÑÑõÄñÜÕ	1.08	C10H15N5O10P2	427.201	Nucleotide And Its Derivates	ºËÜÕËá¼°ÆäÑÜÉúÎï	"3493-09-2"	129300	138500	246500	25240000	8503000	8172000	0.012270070380532	-6.34871266552	0.00170224166760679	1	1.9735376452942
Com_162_neg	D-Galactonic acid	D-°ëÈéÌÇËá	0.92	C6H12O7	196.155	Organic Acid And Its Derivatives	ÓÐ»úËá¼°ÆäÑÜÉúÎï	"13382-27-9"	80590	50890	108200	38560	54200	45080	1.73882762623331	0.798114922234	0.128343588564943	0.888888888888889	1.47382855457619
Com_163_neg	D-Gluconic acid	D-ÆÏÌÑÌÇËá	0.91	C6H12O7	196.155	Sugar Acids And Its Derivatives	ÌÇËá¼°ÆäÑÜÉúÎï	"526-95-4"	172600	147500	225500	112100	97200	89190	1.82786693021542	0.870161045174	0.0234400090904058	1	1.67879950928243
Com_164_neg	D-Glucarate	ÆÏÌÑÌÇ¶þËá	0.82	C6H10O8	210.139	Carbohydrates And Its Derivatives	ÌÇÀà¼°ÆäÑÜÉúÎï	"87-73-0"	26030	29710	28000	17510	18660	21520	1.45155139538915	0.537595654679	0.0102852883896842	1	1.82651103068872
Com_165_neg	UDP	ÄòÜÕ¶þÁ×Ëá	0.7	C9H14N2O12P2	404.16	Nucleotide And Its Derivates	ºËÜÕËá¼°ÆäÑÜÉúÎï	"58-98-0"	1824000	944500	874300	1140000	1639000	1031000	0.956115485564304	-0.0647432084926	0.781494126780285	0.666666666666667	0.590921470777059
Com_166_neg	D-Erythrose 4-phosphate	D-³àÞºÌÇ-4-Á×Ëá	0.95	C4H9O7P	200.084	Carbohydrates And Its Derivatives	ÌÇÀà¼°ÆäÑÜÉúÎï	"585-18-2"	17350000	4678000	3290000	13940000	299400000	222000000	0.0472933089251691	-4.4022201048	0.0899216511563067	0.888888888888889	1.67252689812244
Com_167_neg	D-Fructose 1,6-bisphosphate	D-¹ûÌÇ-1,6-¶þÁ×Ëá	0.86	C6H14O12P2	340.116	Sugar Acids And Its Derivatives	ÌÇËá¼°ÆäÑÜÉúÎï	"488-69-7"	1647000	404900	262600	2547000	1425000	1076000	0.458498415213946	-1.12501134769	0.194435081205439	0.777777777777778	0.975032683322654
Com_168_neg	dATP	ÍÑÑõÈýÁ×ËáÏÙÜÕ	0.73	C10H16N5O12P3	491.001	Nucleotide And Its Derivates	ºËÜÕËá¼°ÆäÑÜÉúÎï	"1927-31-7"	18510	8401	13110	13780	19770	15200	0.82094358974359	-0.284645002718	0.4223327141846	0.777777777777778	0.815028104431968
Com_169_neg	1,3 bisphosphoglycerate	1,3-¸ÊÓÍ¶þõ¥	12.04	C3H8O10P2	266.04	Glycerolipids	¸ÊÓÍÖ¬Àà		65230	47450	58900	81540	75230	116900	0.626959476742062	-0.673555896824	0.0573813213024515	1	1.70194738665759
Com_16_neg	15-Hete	15-ôÇ¶þÊ®ÍéËÄÏ©Ëá	13.08	C20H32O3	320.5	Eicosanoid	Ñõ»¯Ö¬ÖÊ	"54845-95-3"	10140	6778	8441	4240	3570	8499	1.55490833282237	0.636829531044	0.189869046915904	0.777777777777778	1.17094412110633
Com_170_neg	Octanedioic acid	ÐÁ¶þËá	6.649	C8H14O4	174.19	Organic Acid And Its Derivatives	ÓÐ»úËá¼°ÆäÑÜÉúÎï	"505-48-6"	89560	105500	78810	89660	92520	89050	1.00973343656675	0.0139744806	0.97775282253213	0.555555555555556	0.161693641222375
Com_171_neg	N-Acetyl-D-glucosamine	N-ÒÒõ£-D-°±»ùÆÏÌÑÌÇ	0.984	C8H15NO6	221.208	Carbohydrates And Its Derivatives	ÌÇÀà¼°ÆäÑÜÉúÎï	"7512-17-6"	4428	4355	4963	4388	3415	5717	1.01671597633136	0.0239167128563	0.830525172893085	0.555555555555556	0.390206553915919
Com_172_neg	2-Hydroxybutyric acid	2-ôÇ»ù¶¡Ëá	2.741	C4H8O3	104.1	Organic Acid And Its Derivatives	ÓÐ»úËá¼°ÆäÑÜÉúÎï	"600-15-7"	535500	468600	480000	732700	554000	625600	0.776081158813994	-0.365720564516	0.0722830078052289	1	0.713987661813611
Com_173_neg	N-Acetyl-L-methionine	N-ÒÒõ£-L-µ°°±Ëá	5.315	C7H13NO3S	191.25	Amino Acid And Its Derivatives	°±»ùËá¼°ÆäÑÜÉúÎï	"65-82-7"	22220	23170	27280	15090	12810	14310	1.72162994551054	0.783775077027	0.00297454829479923	1	2.0112134568166
Com_174_neg	(R)-3-Hydroxyisobutyric acid	(R)-3-ôÇ»ùÒì¶¡Ëá	2.37	C4H8O3	104.104	Organic Acid And Its Derivatives	ÓÐ»úËá¼°ÆäÑÜÉúÎï	"1910-47-0"	768600	507900	399500	399100	365100	546300	1.27890118275467	0.354904795371	0.388045058963832	0.777777777777778	0.59677089443541
Com_175_neg	2-Hydroxybutanoic acid	(S)-2-ôÇ»ù¶¡Ëá	2.64	C4H8O3	104.104	Organic Acid And Its Derivatives	ÓÐ»úËá¼°ÆäÑÜÉúÎï	"3347-90-8"	410300	314100	373500	508500	413400	511100	0.766154919748779	-0.384291954232	0.0640052041427356	1	0.817001398046924
Com_176_neg	N-Acetyl-L-tyrosine	N-ÒÒõ£-L-ÀÒ°±Ëá	5.17	C11H13NO4	223.23	Amino Acid And Its Derivatives	°±»ùËá¼°ÆäÑÜÉúÎï	"537-55-3"	26770	19250	15750	32460	10870	15460	1.05068889266882	0.0713355527951	0.736675802918866	0.666666666666667	0.300642469768995
Com_177_neg	Itaconic acid	ÒÂ¿µËá	1.45	C5H6O4	130.1	Fatty Acyls	Ö¬·¾õ£Àà	"97-65-4"	88060	97230	92210	104500	94920	102200	0.920031828128108	-0.120244323404	0.110582414732548	0.888888888888889	0.294530143790483
Com_178_neg	Pyridoxal 5-phosphate monohydrate	5-Á×ËáßÁ¶ßÈ©	1.7	C8H12NO7P	265.16	Vitamins	Î¬ÉúËØ	"41468-25-1"	2011000	2330000	1957000	2583000	2694000	2551000	0.804547777210015	-0.313749998491	0.045619501229569	1	1.20707173254185
Com_179_neg	DL-Serine	DL-Ë¿°±Ëá	0.83	C3H7NO3	105.09	Amino Acid And Its Derivatives	°±»ùËá¼°ÆäÑÜÉúÎï	"302-84-1"	794200	1044000	1459000	484400	347500	918000	1.88422195554032	0.913968919991	0.123956176224024	0.888888888888889	1.37342064976584
Com_17_neg	Shikimic Acid	Ã§²ÝËá	5.24	C7H10O5	174.15	Alcohols and polyols	´¼ºÍ¶àÔª´¼	"138-59-0"	37160	190300	48140	60320	138300	38410	1.16272201830992	0.21750622085	0.976127110560537	0.555555555555556	0.0505206538039236
Com_180_neg	Irbesartan	¶ò±´É³Ì¹	1.04	C25H28N6O	428.529	Benzene and substituted derivatives	±½¼°ÆäÑÜÉúÎï	"138402-11-6"	22560	19530	28350	77890	34820	41390	0.457105775470474	-1.12940004757	0.0786946932423401	1	1.47219450475735
Com_181_neg	Hydroquinone	¶Ô±½¶þ·Ó	4.79	C6H6O2	110.111	Phenols And Its Derivatives	·ÓÀà¼°ÆäÑÜÉúÎï	"123-31-9"	4099	13130	12000	7440	16600	4974	1.00741021575791	0.0106512659961	0.975717305685503	0.444444444444444	0.0609900597463563
Com_182_neg	Calcium D-Panthotenate	D-·ºËá¸Æ	4.59	C18H32CaN2O10	476.53	Vitamins	Î¬ÉúËØ	"137-08-6"	34020000	33560000	30120000	34650000	31370000	22190000	1.10758417412992	0.147416344817	0.477661277027912	0.555555555555556	0.566980660039018
Com_183_neg	L-Arabinose	°¢À­²®ÌÇ	0.9	C5H10O5	150.13	Carbohydrates And Its Derivatives	ÌÇÀà¼°ÆäÑÜÉúÎï	"5328-37-0"	14690	17570	20310	15020	9976	17830	1.22752533507682	0.295752800843	0.332840508868806	0.666666666666667	1.08746309248959
Com_184_neg	D-3-Phenyllactic acid	D-3-±½ÈéËá	6.77	C9H10O3	166.17	Organic Acid And Its Derivatives	ÓÐ»úËá¼°ÆäÑÜÉúÎï	"7326-19-4"	287900	245600	199600	259500	264800	118200	1.14101167315175	0.190313551234	0.571383168685159	0.444444444444444	0.562702006418891
Com_185_neg	L-Glutamic acid monosodium salt	¹È°±ËáÄÆ	0.86	C5H8NNaO4	169.11	Amino Acid And Its Derivatives	°±»ùËá¼°ÆäÑÜÉúÎï	"142-47-2"	1135000	2207000	2095000	1917000	847000	1623000	1.23934351493048	0.309576121779	0.523526572710629	0.777777777777778	0.822208941159399
Com_186_neg	L(+)-Asparagine monohydrate	L-Ìì¶¬õ£°·Ò»Ë®Îï	0.83	C4H8N2O3.H2O	150.13	Amino Acid And Its Derivatives	°±»ùËá¼°ÆäÑÜÉúÎï	"5794-13-8"	486700	1019000	1050000	324500	215800	361800	2.83305620219488	1.5023592222	0.0358401943634043	1	1.60049163361409
Com_187_neg	Cytidine-5'-monophosphate	°ûÜÕ-5-µ¥Á×Ëá	0.97	C9H14N3O8P	323.197	Nucleotide And Its Derivates	ºËÜÕËá¼°ÆäÑÜÉúÎï	"63-37-6"	201300	299100	204400	61070	128800	150200	2.07251448231247	1.05138218302	0.0891505328329202	1	0.949500942228153
Com_188_neg	L-Pyroglutamic acid	½¹¹È°±Ëá	1.689	C5H7NO3	129.11	Organic Acid And Its Derivatives	ÓÐ»úËá¼°ÆäÑÜÉúÎï	"98-79-3"	184900	106600	110900	64910	132500	78370	1.45913409239249	0.545112471015	0.23282007554084	0.777777777777778	1.12516929732224
Com_189_neg	Citric acid	ÄûÃÊËá	1.516	C6H8O7	192.12	Tca Cycle	ÈýôÈËáÑ­»·	"77-92-9"	4356000	6714000	7372000	11810000	5125000	8521000	0.724465744814582	-0.465010618983	0.38340889789764	0.777777777777778	0.531010593753129
Com_18_neg	Beta-Alanine	¦Â-°±»ù±ûËá	4.54	C3H7NO2	89.09	Amino Acid And Its Derivatives	°±»ùËá¼°ÆäÑÜÉúÎï	"107-95-9"	5819	5290	5296	5189	5158	2921	1.23643352426892	0.306184676618	0.326665013280755	1	0.775232829322241
Com_190_neg	DL-Norepinephrine	DL-È¥¼×ÉöÉÏÏÙËØ	0.917	C8H12ClNO3	205.639	Hormones	¼¤ËØ	"55-27-6"	36970	69380	47820	80060	27170	138100	0.628418864386744	-0.670201605616	0.606584803174332	0.666666666666667	0.678103416300084
Com_191_neg	Lactobionic acid	ÈéÌÇËá	0.91	C12H22O12	358.3	Carbohydrates And Its Derivatives	ÌÇÀà¼°ÆäÑÜÉúÎï	"96-82-2"	8430	10790	18920	31620	9715	29910	0.535335813039512	-0.901483925204	0.297059491082024	0.777777777777778	0.973282685394113
Com_192_neg	Fumaric acid	ÑÓºúË÷Ëá	1.82	C4H4O4	116.07	Tca Cycle	ÈýôÈËáÑ­»·	"110-17-8"	417200	819000	343000	483000	472100	382700	1.18044550754971	0.239331444529	0.74974628997618	0.555555555555556	0.320983349421805
Com_193_neg	L-Arabinitol	L-(-)-°¢À­²®´¼	0.925	C5H12O5	152.15	Sugar Alcohols	ÌÇ´¼	"7643-75-6"	4639	8139	7111	5475	9429	6682	0.921384230519781	-0.118125188443	0.737306661533932	0.444444444444444	0.379119757780915
Com_194_neg	Taurohyocholic acid sodium salt	Å£»ÇÖíµ¨ËáÄÆÑÎ	9.03	C26H44NNaO7S	537.69	Bile Acids	µ¨Ö­Ëá		932900	135000	224100	342200	370800	2122000	0.455731922398589	-1.13374266514	0.416406612978665	0.777777777777778	0.750808305209283
Com_195_neg	L-(-)-Glyceric acid	L-¸ÊÓÍËá	1.0	C3H6O4	106.077	Sugar Acids And Its Derivatives	ÌÇËá¼°ÆäÑÜÉúÎï	"28305-26-2"	193300	166500	70050	143100	179900	172300	0.867857863920856	-0.204469314669	0.552757979928183	0.555555555555556	0.655264110590713
Com_196_neg	Lactic acid	ÈéËá	1.44	C3H6O3	90.078	Organic Acid And Its Derivatives	ÓÐ»úËá¼°ÆäÑÜÉúÎï	"50-21-5"	65520000	62140000	54100000	46100000	61410000	53570000	1.12838341196921	0.174257362559	0.29167419399612	0.888888888888889	1.15231857258486
Com_197_neg	L-Cysteinesulfinic acid	L-°ëë×ÑÇ»ÇËá	0.88	C3H7NO4S	153.16	Organic Acid And Its Derivatives	ÓÐ»úËá¼°ÆäÑÜÉúÎï	"1115-65-7"	18590	27160	49320	25110	3653	7110	2.65018258857637	1.40609175989	0.152330934602808	0.888888888888889	1.26888312336132
Com_198_neg	L-Homocystine	L-¸ßë×°±Ëá	0.83	C8H16N2O4S2	268.354	Amino Acid And Its Derivatives	°±»ùËá¼°ÆäÑÜÉúÎï	"626-72-2"	13680	14960	16430	7812	15120	27560	0.892616652142914	-0.163887373958	0.979163773045766	0.555555555555556	0.0383878170318773
Com_199_neg	Linolelaidic Acid (C18:2N6T)	·´ÑÇÓÍËá	15.16	C18H32O2	280.445	Fatty Acyls	Ö¬·¾õ£Àà	"506-21-8"	40110	99890	77630	21520	32550	36670	2.39839100727353	1.26206687905	0.0721294772149131	1	1.51481871503557
Com_19_neg	Erythronolactone	(3R,4R)-D-³àÍªËáÄÚõ¥	4.03	C4H6O4	118.09	Organoheterocyclic compounds	ÓÐ»úÔÓ»·»¯ºÏÎï	"15667-21-7"	89560	95760	92220	85660	74090	79100	1.16198450910613	0.216590835709	0.0508934470916289	1	1.39687776221024
Com_1_neg	Tauro-alpha-Muricholic acid sodium salt	Å£»Ç-°¢¶û·¨-Êóµ¨ËáÄÆÑÎ	9.01	C26H44NO7S.Na	537.69	Bile Acids	µ¨Ö­Ëá	"25696-60-0"	869300	126800	215200	344100	365700	1972000	0.451674248638974	-1.14664543132	0.388983756315608	0.777777777777778	0.783581009741538
Com_200_neg	Lysopa 16:0	ÈÜÑªÂÑÁ×Ö¬Ëá16:0	12.54	C19H39O7P	410.48	Phospholipid	Á×Ö¬		10400	11360	11010	9973	5952	9591	1.28429220881016	0.360973489251	0.236924279373586	1	0.720164787608351
Com_201_neg	Lysope 14:0	ÈÜÑªÂÑÁ×Ö¬õ£ÒÒ´¼°·14:0	11.27	C19H40NO7P	425.5	Phospholipid	Á×Ö¬		2626	3837	2555	4294	4966	2680	0.755276381909548	-0.404923421515	0.314727953628808	0.888888888888889	0.67876666903518
Com_202_neg	Lysope 16:0	ÈÜÑªÂÑÁ×Ö¬õ£ÒÒ´¼°·16:0	12.48	C21H44NO7P	453.55	Phospholipid	Á×Ö¬		708700	744700	894400	753700	321500	878100	1.20196590385501	0.265395971725	0.487336232996098	0.444444444444444	0.791901337769562
Com_203_neg	LysoPE 18:0	ÈÜÑªÁ×Ö¬õ£ÒÒ´¼°· 18:0	13.73	C23H48NO7P	481.6	Phospholipid	Á×Ö¬	"69747-55-3"	498300	1523000	1355000	1243000	453000	1389000	1.09442463533225	0.130172610548	0.864826838210787	0.666666666666667	0.532036781139766
Com_204_neg	PE(18:1(9Z)/0:0)	PE(18:1(9Z)/0:0)	12.85	C23H46NO7P	479.6	Glycerolipids	¸ÊÓÍÖ¬Àà	"89576-29-4"	471000	614700	474700	471200	220000	579700	1.22779132897946	0.296065386256	0.45179951886255	0.666666666666667	0.841669597785952
Com_205_neg	4-Hydroxyphenyllactate	¶ÔôÇ»ù±½ÈéËá	5.02	C9H10O4	182.173	Organic Acid And Its Derivatives	ÓÐ»úËá¼°ÆäÑÜÉúÎï	"6482-98-0"	342800	294900	145500	243200	176200	93270	1.52768837653851	0.611350287174	0.323792194596046	0.777777777777778	1.01251933190389
Com_206_neg	D-Glucosamine 6-phosphate	D-°±»ùÆÏÌÑÌÇ-6-Á×Ëá	0.86	C6H14NO8P	259.151	Sugar Acids And Its Derivatives	ÌÇËá¼°ÆäÑÜÉúÎï	"3616-42-0"	381900	726900	382900	589300	304600	551600	1.0319612590799	0.0453888114759	0.940899383154919	0.444444444444444	0.211737422666289
Com_207_neg	2-Hydroxy-2-methylbutanedioic acid	2-ôÇ»ù-2-¼×»ù¶¡¶þËá	1.5	C5H8O5	148.114	Fatty Acyls	Ö¬·¾õ£Àà	"597-44-4"	55680	59810	66760	62880	59790	59570	1.00005487269535	7.91623935545e-05	0.96833109670746	0.555555555555556	0.0763470474587502
Com_208_neg	3-(2-Naphthyl)-D-Alanine	3-(2-ÝÁ»ù)-D-±û°±Ëá	6.22	C13H13NO2	215.248	Amino Acid And Its Derivatives	°±»ùËá¼°ÆäÑÜÉúÎï	"76985-09-6"	29910	45560	46150	29300	21110	56400	1.13865742907967	0.187333770132	0.586141436645193	0.666666666666667	0.587212357129653
Com_209_neg	dADP	2'-ÍÑÑõÏÙÜÕ-5'-¶þÁ×Ëá	0.75	C10H15N5O9P2	411.202	Nucleotide And Its Derivates	ºËÜÕËá¼°ÆäÑÜÉúÎï	"2793-06-8"	46290	55110	55770	59800	53710	58400	0.914257460298994	-0.129327600947	0.268896511880676	0.777777777777778	1.00932340206811
Com_20_neg	3-Hydroxypropanoic acid	3-ôÇ»ù±ûËá	1.15	C3H6O3	90.08	Organic Acid And Its Derivatives	ÓÐ»úËá¼°ÆäÑÜÉúÎï	"503-66-2"	26730	25740	23700	17370	22640	19880	1.2718316914343	0.34690776339	0.0669473778917565	1	1.13464551326125
Com_210_neg	2-deoxyglucose-6-phosphate	6-Á×Ëá-2-ÍÑÑõÆÏÌÑÌÇ	0.98	C6H13O8P	244.136	Nucleotide And Its Derivates	ºËÜÕËá¼°ÆäÑÜÉúÎï	"3573-50-0"	398300	1127000	898600	400800	254900	475300	2.14314765694076	1.09973125113	0.143015582155034	0.777777777777778	1.3642780249641
Com_211_neg	dGTP	2'-ÍÑÑõÄñÜÕ5'-ÈýÁ×Ëá	1.1	C10H16N5O13P3	507.181	Nucleotide And Its Derivates	ºËÜÕËá¼°ÆäÑÜÉúÎï	"2564-35-4"	60080	48120	9961	21650000	405000	346800	0.00527462078940085	-7.56671690741	0.0881886822843847	1	1.28775018464037
Com_212_neg	3-Methylsalicylate	3-¼×·Ó»ÇËá	0.71	C8H8O3	152.147	Benzene and substituted derivatives	±½¼°ÆäÑÜÉúÎï	"83-40-9"	237600	234800	309900	214600	242300	357600	0.960466543891958	-0.0581927337834	0.899995941600531	0.555555555555556	0.116896781723174
Com_213_neg	Traumatic acid	·´Ê½-2-Ê®¶þÌ¼Ï©¶þËá	9.19	C12H20O4	228.28	Fatty Acyls	Ö¬·¾õ£Àà	"6402-36-4"	374700	369600	399300	376300	382900	350300	1.03073456511942	0.0436728575467	0.448254822167662	0.444444444444444	0.752333320126747
Com_214_neg	2-Hydroxy-2-methylbutanoic acid	2-ôÇ»ù-2-¼×»ù¶¡Ëá	4.61	C5H10O3	118.13	Fatty Acyls	Ö¬·¾õ£Àà	"3739-30-8"	36150	46720	111300	39350	60030	66840	1.16815064372518	0.224226334955	0.887581926317458	0.555555555555556	0.224112281468188
Com_215_neg	Pyridoxal 5'-phosphate hydrate	3-ôÇ»ù-2-¼×»ù-5-Á×õ£Ñõ¼×»ù-4-ßÁà¤¼×È©	1.63	C8H10NO6P	247.14	Pyridine And Its Derivatives	ßÁà¤¼°ÆäÑÜÉúÎï	"853645-22-4"	124000	129100	122400	168300	167400	159100	0.758892481810833	-0.398032592575	0.000352133690792777	1	1.55520774195944
Com_216_neg	Quinic acid	¿üÄáËá	0.998	C7H12O6	192.17	Organic Acid And Its Derivatives	ÓÐ»úËá¼°ÆäÑÜÉúÎï	"77-95-2"	193900	340100	163000	268400	231800	234117	0.949181348109876	-0.075244343759	0.69582688348828	0.666666666666667	0.291821012546026
Com_217_neg	Inositol	¼¡´¼	0.85	C6H12O6	180.16	Phenols And Its Derivatives	·ÓÀà¼°ÆäÑÜÉúÎï	"87-89-8"	148700	303600	303000	130400	108700	220600	1.64302806177942	0.716357120729	0.198290110797156	0.888888888888889	1.16935432745973
Com_218_neg	2,4-Dihydroxybenzoic Acid	2,4-¶þôÇ»ù±½¼×Ëá	1.7	C7H6O4	154.12	Benzoic Acid And Its Derivatives	±½¼×Ëá¼°ÆäÑÜÉúÎï	"89-86-1"	7025	5971	5822	4613	4781	6023	1.22060063566193	0.287591246848	0.12603499733876	0.777777777777778	1.21235873407595
Com_219_neg	Linoleic acid	ÑÇÓÍËá(C18:2)	15.19	C18H32O2	280.4	Fatty Acyls	Ö¬·¾õ£Àà	"60-33-3"	42500	109600	73230	27680	33030	42230	2.18894501651447	1.13023571633	0.101749876798684	1	1.51451752922609
Com_21_neg	Hydroxyphenyllactic acid	ôÇ±½»ùÈéËá	5.07	C9H10O4	182.17	Organic Acid And Its Derivatives	ÓÐ»úËá¼°ÆäÑÜÉúÎï	"306-23-0"	385700	310100	156300	274700	204200	106200	1.45633225089728	0.542339532761	0.384804920430816	0.777777777777778	0.931354707593445
Com_220_neg	gamma-Linolenic acid	¦Ã-ÑÇÂéËá(C18:3)	12.03	C18H30O2	278.4	Fatty Acyls	Ö¬·¾õ£Àà	"506-26-3"	177200	179300	159900	225500	210400	209000	0.800744301442084	-0.3205864689	0.0100123859394041	1	1.90870059849675
Com_221_neg	Trans,Trans-Muconic Acid	·´,·´-Õ³¿µËá	0.96	C6H6O4	142.11	Fatty Acyls	Ö¬·¾õ£Àà	"3588-17-8"	8586	10580	6987	6091	5313	7646	1.37286089238845	0.457185449208	0.122322560945811	0.888888888888889	1.18587679820635
Com_222_neg	5-Hydroxyhexanoic Acid	5-ôÇ»ù¼ºËá	6.36	C6H12O3	132.16	Fatty Acyls	Ö¬·¾õ£Àà	"185956-02-9"	60710	66950	75340	71490	52720	54160	1.13808375847957	0.186606738221	0.317600025358333	0.777777777777778	0.543909240660662
Com_223_neg	Cis-4,7,10,13,16,19-Docosahexaenoic Acid(C22:6N3)	Ë³Ê½-4,7,10,13,16,19-¶þÊ®¶þÌ¼ÁùÏ©Ëá	14.89	C22H32O2	328.5	Fatty Acyls	Ö¬·¾õ£Àà	"6217-54-5"	45630	39030	48430	31450	31020	38430	1.31902874132805	0.39947600092	0.0427294249611434	1	1.36329076474906
Com_224_neg	Adenosine5-phosphosulfate	ÏÙÜÕ5-Á×õ£ÁòËá¶þÄÆÑÎ	1.04	C10H13N5NaO10PS	449.266	Nucleotide And Its Derivates	ºËÜÕËá¼°ÆäÑÜÉúÎï	"102029-95-8"	11340	33795	35660	68460	29500	41120	0.580924647684786	-0.783577052534	0.259467449255026	0.777777777777778	1.16392500361859
Com_225_neg	Adenosine5'-diphosphoglucose	5'-¶þÁ×ËáÆÏÌÑÌÇÏÙÜÕ¶þÄÆÑÎ	1.02	C16H23N5Na2O15P2	633.305	Nucleotide And Its Derivates	ºËÜÕËá¼°ÆäÑÜÉúÎï	"102129-65-7"	35700	36330	55100	20710	56950	12180	1.41507123775601	0.500874683284	0.359781039944877	0.666666666666667	1.02698475493443
Com_226_neg	Adenosine 5'-Diphosphate	¶þÁ×ËáÏÙÜÕ	1.04	C10H15N5O10P2	427.201	Nucleotide And Its Derivates	ºËÜÕËá¼°ÆäÑÜÉúÎï	"58-64-0"	284500	382200	399000	32540000	11730000	10860000	0.019330672954834	-5.6929643271	0.00510237434374191	1	1.97428069418586
Com_227_neg	8,15-Dihete	8,15-¶þôÇ»ù¶þÊ®Ì¼ËÄÏ©Ëá	7.14	C20H32O4	336.466	Eicosanoid	Ñõ»¯Ö¬ÖÊ	"80234-65-7"	5206	3615	4040	3292	2903	3935	1.26959526159921	0.34436864885	0.170423207607967	0.888888888888889	1.00219735614432
Com_228_neg	5-Methyl-dl-tryptophan	5-¼×»ù-DL-É«°±Ëá	4.26	C12H14N2O2	218.252	Amino Acid And Its Derivatives	°±»ùËá¼°ÆäÑÜÉúÎï	"951-55-3"	211800	112100	268500	50620	53350	59910	3.61484012692214	1.8539318427	0.0383779335809546	1	1.82683255470399
Com_229_neg	5-Hydroxyindole-2-carboxylic acid	5-ôÇ»ùßÅßá-2-¼×Ëá	0.71	C9H7NO3	177.157	Indole And Its Derivatives	ßÅßá¼°ÆäÑÜÉúÎï	"21598-06-1"	294800	343000	285100	313600	279900	328000	1.00151926207271	0.00219016855905	0.995600602249641	0.444444444444444	0.143333481902158
Com_22_neg	4-Hydroxyphenylethanol	¶ÔôÇ»ù±½ÒÒ´¼	7.61	C8H10O2	138.16	Phenols And Its Derivatives	·ÓÀà¼°ÆäÑÜÉúÎï	"501-94-0"	542700	525100	533300	525000	493200	502500	1.05287038863681	0.0743278473988	0.0890794805482873	1	0.770422397769452
Com_230_neg	Guanidinoacetic acid	ëÒ»ùÒÒËá	1.13	C3H7N3O2	117.107	Organic Acid And Its Derivatives	ÓÐ»úËá¼°ÆäÑÜÉúÎï	"352-97-6"	9243	25420	21350	37590	16270	34050	0.637163007621431	-0.650265585511	0.312181559922514	0.777777777777778	1.19765218835989
Com_231_neg	D-Fructose 6-phosphate	D-¹ûÌÇ-6-Á×Ëá	0.87	C6H13O9P	260.03	Carbohydrates And Its Derivatives	ÌÇÀà¼°ÆäÑÜÉúÎï	"643-13-0"	230800000	74760000	59680000	173100000	184600000	51430000	0.892723584190844	-0.163714554982	0.804684445442996	0.444444444444444	0.379795123828618
Com_232_neg	5-oxoproline	5-Ñõ»¯¸¬°±Ëá	1.63	C5H7NO3	129.043	Amino Acid And Its Derivatives	°±»ùËá¼°ÆäÑÜÉúÎï	"149-87-1"	145100	75030	81190	48870	98540	55500	1.484993346804	0.570456467353	0.25417380020466	0.777777777777778	1.11539098732893
Com_233_neg	Deoxycytidine	ÍÑÑõ°ûÜÕ	1.81	C9H13N3O4	227.091	Nucleotide And Its Derivates	ºËÜÕËá¼°ÆäÑÜÉúÎï	"951-77-9"	49070	44210	46630	50310	20110	28740	1.41095199677289	0.496668905585	0.258824104160746	0.666666666666667	1.16154458336647
Com_234_neg	UDP-D-glucose	ÄòÜÕ 5'-¶þÁ×ËáÆÏÌÑÌÇ	0.95	C15H24N2O17P2	566.1	Carbohydrates And Its Derivatives	ÌÇÀà¼°ÆäÑÜÉúÎï	"133-89-1"	1701000	2570000	3030000	2181000	3461000	3643000	0.786322024771136	-0.346807830245	0.362188001050123	0.777777777777778	0.851030810425007
Com_235_neg	12,13-EODE	12,13-»·ÑõÊ®°ËÌ¼¶þÏ©Ëá	12.67	C18H32O3	296.0	Eicosanoid	Ñõ»¯Ö¬ÖÊ		73220	100100	86340	35160	26390	63470	2.07694768836986	1.05446487979	0.078946863304958	1	1.2173901074276
Com_236_neg	Sodium cholate	µ¨ËáÄÆ	10.34	C24H39NaO5	430.55	Bile Acids	µ¨Ö­Ëá	"361-09-1"	2334	2146	6310	3400	4025	2490	1.08825012607161	0.122010187259	0.951246207789549	0.666666666666667	0.218836382859502
Com_237_neg	Tropolone	»·¸ýÈýÏ©·ÓÍª	7.39	C7H6O2	122.12	Ketones	ÍªÀà	"533-75-5"	108100	194000	102500	130300	130300	125800	1.04710144927536	0.0664012257225	0.992619699710673	0.666666666666667	0.0323215884517366
Com_238_neg	Bisphenol A	Ë«·ÓA	9.58	C15H16O2	228.29	Phenols And Its Derivatives	·ÓÀà¼°ÆäÑÜÉúÎï	"80-05-7"	13980	17330	14770	17880	15240	14900	0.959600166597251	-0.0594946867881	0.651431059206729	0.777777777777778	0.360524944422139
Com_239_neg	Cyclohexaneacetic acid	»·¼º»ùÒÒËá	1.03	C8H14O2	142.2	Fatty Acyls	Ö¬·¾õ£Àà	"5292-21-7"	406700	794300	707200	395600	686100	331100	1.35065118912797	0.433655141214	0.360401687331641	0.888888888888889	0.741843828756647
Com_23_neg	Isocytosine	Òì°ûà×à¤	0.91	C4H5N3O	111.1	Nucleotide And Its Derivates	ºËÜÕËá¼°ÆäÑÜÉúÎï	"108-53-2"	3733	5735	4280	3928	6443	4453	0.927415002698327	-0.108713029655	0.74204061018403	0.666666666666667	0.33275736520607
Com_240_neg	4-Nitrophenol	4-Ïõ»ù±½·Ó	7.71	C6H5NO3	139.11	Phenols And Its Derivatives	·ÓÀà¼°ÆäÑÜÉúÎï	"100-02-7"	1411000	1472000	1247000	1297000	1379000	1383000	1.01749199310175	0.0250174416091	0.79688197141513	0.666666666666667	0.421869713014245
Com_242_neg	CDP	5-°ûÜÕ¶þÁ×Ëá	0.99	C9H15N3O11P2	403.176	Nucleotide And Its Derivates	ºËÜÕËá¼°ÆäÑÜÉúÎï	"63-38-7"	9867	7237	38020	434800	255900	252400	0.0584497932350758	-4.09665826851	0.0174200540473271	1	1.86695765062266
Com_243_neg	N-Methylhydantoin	¼×õ£ÒÒÄÚëå	1.39	C4H6N2O2	114.1	Organoheterocyclic compounds	ÓÐ»úÔÓ»·»¯ºÏÎï	"616-04-6"	2908000	3828000	3092000	3423000	3559000	3664000	0.923163629532219	-0.115341708563	0.408729358168055	0.666666666666667	0.866615828393482
Com_244_neg	UDP-D-glucuronate	ÄòÜÕ-5'-¶þÁ×ËáÆÏÌÇÈ©Ëá	0.94	C15H22N2O18P2	580.285	Nucleotide And Its Derivates	ºËÜÕËá¼°ÆäÑÜÉúÎï	"2616-64-0"	141700	132900	65690	490200	188700	435800	0.30527496187315	-1.71181882785	0.0423765225422889	1	1.54514019665138
Com_245_neg	UDP-galactose	ÄòÜÕ-5'-¶þÁ×Ëá°ëÈéÌÇ	0.92	C15H22N2Na2O17P2	610.265	Nucleotide And Its Derivates	ºËÜÕËá¼°ÆäÑÜÉúÎï	"2956-16-3"	2827000	3921000	5136000	3425000	6018000	6420000	0.749164722940175	-0.416645128085	0.347810526139026	0.777777777777778	0.926941982219781
Com_246_neg	geranyl pp	½¹Á×ËáÏãÒ¶õ¥	0.83	C10H20O7P2	314.209	Prenol lipids	Ï©´¼õ¥		16620	27790	20070	12450	14140	16560	1.49432213209733	0.579491184462	0.106801285164264	1	0.817619492923811
Com_247_neg	Glyceraldehyde 3-phosphate diethyl acetal	DL-¸ÊÓÍÈ©Ëõ¶þÒÒ´¼-3-Á×ËáÒ»±µÑÎ	0.96	C7H15BaO7P	379.491	Organic Acid And Its Derivatives	ÓÐ»úËá¼°ÆäÑÜÉúÎï	"93965-35-6"	596200	649100	718400	459500	353000	477200	1.52260215554005	0.606539025732	0.0269225109210052	1	1.35588978479086
Com_248_neg	1,2,3-Benzenetricarboxylic acid	1,2,3-±½Èý¼×Ëá	6.42	C9H6O6	210.14	Benzoic Acid And Its Derivatives	±½¼×Ëá¼°ÆäÑÜÉúÎï	"569-51-7"	6715	4026	6826	3708	15600	6713	0.675108566158103	-0.566808570112	0.625331015261183	0.555555555555556	0.649730557864261
Com_249_neg	2-Phosphoglyceric acid	2-Á×Ëá¸ÊÓÍËá	0.92	C3H7O7P	186.057	Carbohydrates And Its Derivatives	ÌÇÀà¼°ÆäÑÜÉúÎï	"2553-59-5"	3463000	171100	144800	754700	281900	384100	2.65988597170409	1.41136439927	0.989116879993849	0.666666666666667	0.28545883666561
Com_24_neg	13,14-dihydro-15-keto-PGD2	13,14-¶þÇâ-15-ÍªPGD2	1.04	C20H32O5	352.465	Eicosanoid	Ñõ»¯Ö¬ÖÊ	"59894-07-4"	26070	26890	22090	13060	25080	55400	0.802330553773787	-0.317731356911	0.911425582612699	0.555555555555556	0.141376928837748
Com_250_neg	Citraconic acid	Äû¿µËá	1.56	C5H6O4	130.099	Fatty Acyls	Ö¬·¾õ£Àà	"498-23-7"	251200	257000	282100	358400	269300	354500	0.804622276522093	-0.313616414365	0.14161450280627	0.888888888888889	0.719234656341551
Com_251_neg	Citramalate	¼×»ùÆ»¹ûËá	1.44	C5H8O5	148.114	Organic Acid And Its Derivatives	ÓÐ»úËá¼°ÆäÑÜÉúÎï	"2306-22-1"	10980	34910	16910	30910	18720	26270	0.827404479578393	-0.273335326524	0.501573604255023	0.666666666666667	0.504065625969373
Com_252_neg	Cyclohexylsulfamate	»·À­Ëá	1.2	C6H13NO3S	179.237	Organic Acid And Its Derivatives	ÓÐ»úËá¼°ÆäÑÜÉúÎï	"100-88-9"	77140	120500	100200	68790	44740	67330	1.64679862877364	0.719664152495	0.0586565571173501	1	1.58502974540594
Com_253_neg	Cytidine 3'-phosphate	°ûà¤-3'-µ¥Á×Ëá	1.22	C9H14N3O8P	323.197	Nucleotide And Its Derivates	ºËÜÕËá¼°ÆäÑÜÉúÎï	"84-52-6"	274500	372600	178700	53280	186900	129800	2.23201254121844	1.1583451334	0.126722262117719	0.888888888888889	1.14837059896009
Com_254_neg	D-Arabinose 5-phosphate	D-°¢À­²®ÌÇ5-Á×Ëáõ¥	0.9	C5H11O8P	230.11	Carbohydrates And Its Derivatives	ÌÇÀà¼°ÆäÑÜÉúÎï	"13137-52-5"	6791000	13900000	14660000	3416000	2938000	3987000	3.41852818876318	1.77337532166	0.0301865382428236	1	1.76206754537072
Com_255_neg	L-Adrenaline	ÉöÉÏÏÙËØ	1.034	C9H13NO3	183.204	Hormones	¼¤ËØ	"51-43-4"	49439	50300	51480	56950	32170	60110	1.01332841921866	0.0191018266457	0.825438455239546	0.666666666666667	0.277545959793732
Com_256_neg	Prostaglandin E2	Ç°ÁÐÏÙËØE2	9.378	C20H32O5	352.465	Hormones	¼¤ËØ	"363-24-6"	10850	19120	13932	4489	3514	32410	1.08633360552298	0.119467212834	0.500647874567207	0.666666666666667	0.73655240313447
Com_257_neg	L-Ascorbate	¿¹»µÑªËá	1.03	C6H8O6	176.12	Vitamins	Î¬ÉúËØ	"50-81-7"	2485000	3886000	1721000	1310000	1055000	2457000	1.67814184985483	0.746864668956	0.201196534799003	0.888888888888889	1.11111390921997
Com_258_neg	4-Amino-5-imidazolecarboxamide	5-°±»ùßäßò-4-ôÈËá°·	0.915	C4H6N4O	126.12	Organoheterocyclic compounds	ÓÐ»úÔÓ»·»¯ºÏÎï	"360-97-4"	10410	28780	25710	12850	11810	28840	1.21308411214953	0.278679586711	0.683919785592027	0.444444444444444	0.523222324354234
Com_259_neg	Xanthine	»ÆàÑßÊ	1.714	C5H4N4O2	152.11	Nucleotide And Its Derivates	ºËÜÕËá¼°ÆäÑÜÉúÎï	"69-89-6"	2676000	2440000	4195000	3392000	1530000	3819000	1.06520993021393	0.0911377829699	0.765563034549051	0.444444444444444	0.423318813467635
Com_25_neg	dCMP	2'-ÍÑÑõ°ûÜÕ-5'-µ¥Á×Ëá	1.04	C9H14N3O7P	307.197	Nucleotide And Its Derivates	ºËÜÕËá¼°ÆäÑÜÉúÎï	"1032-65-1"	66770	35220	46110	40310	72820	91690	0.72307391856264	-0.46778495602	0.383335993438686	0.777777777777778	0.823794689377082
Com_260_neg	4-Hydroxybenzoic acid	4-ôÇ»ù±½¼×Ëá	5.379	C7H6O3	138.12	Benzoic Acid And Its Derivatives	±½¼×Ëá¼°ÆäÑÜÉúÎï	"99-96-7"	301400	331900	310400	279100	342300	290300	1.03509926510914	0.0497691275446	0.624406750794211	0.666666666666667	0.556768415760884
Com_261_neg	Deoxyinosine	2-ÍÑÑõ¼¡ÜÕ	3.33	C10H12N4O4	252.23	Nucleotide And Its Derivates	ºËÜÕËá¼°ÆäÑÜÉúÎï	"890-38-0"	142700	128000	252300	153200	117200	150400	1.24287072243346	0.313676241842	0.49733603958034	0.444444444444444	0.576316881681069
Com_262_neg	Indoxylsulfuric acid	ßÅßáÁòËá	5.62	C8H7NO4S	213.21	Organic Acid And Its Derivatives	ÓÐ»úËá¼°ÆäÑÜÉúÎï	"487-94-5"	6395	8622	8209	5437	4840	3900	1.63828736686182	0.712188437799	0.0212347854739953	1	1.61818861082127
Com_263_neg	Glutaric Acid	Îì¶þËá	0.7	C5H8O4	132.115	Organic Acid And Its Derivatives	ÓÐ»úËá¼°ÆäÑÜÉúÎï	"110-94-1"	2725000	1361000	2329000	2824000	2192000	2437000	0.86072722393667	-0.216371994344	0.476529717491614	0.666666666666667	0.62941707635296
Com_264_neg	N-Acetyl-Asp-Glu	N-ÒÒõ£-Ìì¶¬°±Ëá-¹È°±Ëá	2.02	C11H16N2O8	304.253	Amino Acid And Its Derivatives	°±»ùËá¼°ÆäÑÜÉúÎï	"3106-85-2"	251600	240300	224100	634600	194700	666400	0.478705622785318	-1.06278934311	0.273005506957903	0.666666666666667	0.986622794585289
Com_265_neg	N-lactoyl-phenylalanine	N-Èéõ£»ù±½±û°±Ëá	6.97	C12H15NO4	237.25	Amino Acid And Its Derivatives	°±»ùËá¼°ÆäÑÜÉúÎï		336100	157400	276200	416100	256300	180700	0.902238893447427	-0.148418616218	0.794856379010303	0.444444444444444	0.2238603790774
Com_266_neg	Orotidine	ÈéÇåÜÕ	1.0	C10H12N2O8	288.211	Nucleotide And Its Derivates	ºËÜÕËá¼°ÆäÑÜÉúÎï	"314-50-1"	21460	11750	15430	17800	12510	22760	0.916525343885434	-0.125753319968	0.738225021849581	0.666666666666667	0.223261396489509
Com_267_neg	NADH	»¹Ô­ÐÍ¸¨Ã¸¢ñ	2.79	C21H29N7O14P2	665.441	Co-Enzyme Factor	¸¨Ã¸Òò×Ó	"58-68-4"	566700	126500	172400	2146000	2166000	1377000	0.152153278256284	-2.71640267676	0.034624380862765	1	1.70549804384821
Com_268_neg	Chenodeoxycholic acid	¶ìÈ¥Ñõµ¨Ëá	11.768	C24H40O4	392.57	Bile Acids	µ¨Ö­Ëá	"474-25-9"	109000	20500	5702	14940	23168	10440	2.78491389964571	1.47763272488	0.67645695038432	0.555555555555556	0.710146950631559
Com_269_neg	Deoxycholic acid	ÍÑÑõµ¨Ëá	11.976	C24H40O4	392.57	Bile Acids	µ¨Ö­Ëá	"83-44-3"	19350	34200	21010	21210	23940	30500	0.985591539986781	-0.0209382224498	0.872528229614772	0.666666666666667	0.21427842156003
Com_26_neg	Pantetheine	·ºõ£ÛÏ»ùÒÒ°·	5.84	C11H22N2O4S	278.13	Amino Acid And Its Derivatives	°±»ùËá¼°ÆäÑÜÉúÎï	"496-65-1"	133000	152800	68350	36250	128800	60700	1.5687707641196	0.649634554582	0.307183243044394	0.888888888888889	0.959401081476361
Com_270_neg	lithocholic acid	Ê¯µ¨Ëá	11.159	C24H40O3	376.57	Bile Acids	µ¨Ö­Ëá	"434-13-9"	1893000	2687000	2762000	2167000	1471000	3158000	1.08034137728075	0.111487261915	0.687954010320493	0.555555555555556	0.500421605494859
Com_271_neg	Cholic acid	µ¨Ëá	10.361	C24H40O5	408.57	Bile Acids	µ¨Ö­Ëá	"81-25-4"	274200	12170	17570	32440	78790	64160	1.7329380238326	0.793220059398	0.76478437080265	0.666666666666667	0.390395251274673
Com_272_neg	Tauroursodeoxycholic acid Dihydrate	Å£»ÇÐÜÍÑÑõµ¨Ëá¶þË®ºÏÎï	9.015	C26H45NO6S.2H2O	535.7	Bile Acids	µ¨Ö­Ëá	"14605-22-2"	13060	22177	22270	45740	20980	38240	0.54789443597561	-0.868030142149	0.126263379327139	0.777777777777778	0.893956655965198
Com_273_neg	Myristic acid	Èâ¶¹Þ¢Ëá	1.03	C14H28O2	228.371	Fatty Acyls	Ö¬·¾õ£Àà	"544-63-8"	319700	447700	301400	546100	317400	1354000	0.481984216459978	-1.0529421916	0.312555136773507	0.777777777777778	0.561940532924661
Com_274_neg	gamma-Glutamylcysteine	5-L-¹È°±õ£-L-°ëë×°±Ëá	1.48	C8H14N2O5S	250.272	Amino Acid And Its Derivatives	°±»ùËá¼°ÆäÑÜÉúÎï	"636-58-8"	52510	86080	256800	98170	94300	35550	1.7340145601263	0.794116012593	0.509367113210259	0.444444444444444	0.678433081781803
Com_275_neg	Sorbitol	É½Àæ´¼	0.91	C6H14O6	182.172	Sugar Alcohols	ÌÇ´¼	"50-70-4"	14790	12670	15100	16010	25750	20110	0.687893971229998	-0.539741883112	0.10593406443159	1	1.01941515413125
Com_276_neg	Taurodeoxycholic acid sodium salt	Å£»ÇÍÑÑõµ¨ËáÄÆÑÎ	10.504	C26H44NNaO6S	521.69	Bile Acids	µ¨Ö­Ëá	"1180-95-6"	3275000	576700	1042000	1205000	650800	5070000	0.70658985243582	-0.501055064518	0.782824748560058	0.666666666666667	0.272866342602062
Com_277_neg	Taurohyodeoxycholic acid sodium salt	Å£»ÇÖíÍÑÑõµ¨ËáÄÆÑÎ	8.928	C26H44NNaO6S	521.69	Bile Acids	µ¨Ö­Ëá	"110026-03-4"	16710	10730	18313	46600	25950	39070	0.409899659559219	-1.28665730314	0.0206931545031587	1	1.48046840190906
Com_278_neg	L-SelenoMethionine	L-Îø´úµ°°±Ëá	18.27	C5H11NO2Se	196.11	Amino Acid And Its Derivatives	°±»ùËá¼°ÆäÑÜÉúÎï	"3211-76-5"	1452000	1484000	1443000	1365000	1347000	1382000	1.06961406936981	0.0970903474292	0.00419229740021583	1	1.84903506675762
Com_279_neg	4-Hydroxyisoleucine	4-ôÇ»ù-L-ÒìÁÁ°±Ëá	1.038	C6H13NO3	147.172	Amino Acid And Its Derivatives	°±»ùËá¼°ÆäÑÜÉúÎï	"781658-23-9"	976600	1857000	1902000	1556000	746100	1371000	1.28926519833383	0.366549052659	0.458925384919563	0.777777777777778	0.902278851734173
Com_27_neg	4-Hydroxy-2-oxoglutaric acid	4-ôÇ»ù-2-ÍªÎì¶þËá	0.74	C5H6O6	162.098	Organic Acid And Its Derivatives	ÓÐ»úËá¼°ÆäÑÜÉúÎï	"1187-99-1"	4860000	4465000	4208000	4597000	4859000	4603000	0.962586243687318	-0.0550122889811	0.4552470362511	0.666666666666667	0.688436439234608
Com_280_neg	Ala-Gln	L-±û°±õ£-L-¹È°±õ£°·	0.85	C8H15N3O4	217.22	Amino Acid And Its Derivatives	°±»ùËá¼°ÆäÑÜÉúÎï	"39537-23-0"	502900	1102000	706300	735700	627600	323700	1.37000592768228	0.45418213539	0.397686400859408	0.666666666666667	0.605505085445405
Com_281_neg	O-Aceyl-L-Serine	O-ÒÒõ£»ù-l-Ë¿°±Ëá	1.056	C5H9NO4	147.129	Amino Acid And Its Derivatives	°±»ùËá¼°ÆäÑÜÉúÎï	"5147-00-2"	5803	14350	13770	18170	10600	9843	0.878538316111154	-0.186822886334	0.663223849148638	0.444444444444444	0.371616649949644
Com_282_neg	(S)-Leucic acid	ôÇ»ùÒì¼ºËáÒÒõ¥	6.404	C6H12O3	132.16	Organic Acid And Its Derivatives	ÓÐ»úËá¼°ÆäÑÜÉúÎï	"13748-90-8"	64750	49600	79150	54340	45450	54330	1.25551518297431	0.32827947526	0.25335111233222	0.777777777777778	0.729577269940762
Com_283_neg	Lactose	ÈéÌÇ	0.911	C12H22O11	342.3	Carbohydrates And Its Derivatives	ÌÇÀà¼°ÆäÑÜÉúÎï	"63-42-3"	158000	67260	91780	90620	53540	83520	1.39248067463106	0.477657305442	0.390137947621149	0.777777777777778	0.677525935939064
Com_284_neg	3-Hydroxyisovalerate	¦Â-ôÇ»ùÒìÎìËá	4.084	C5H10O3	118.13	Organic Acid And Its Derivatives	ÓÐ»úËá¼°ÆäÑÜÉúÎï	"625-08-1"	87420	100400	92090	67950	70230	85670	1.25043555952647	0.32243071098	0.067846161020586	1	1.46560039188952
Com_285_neg	5-Hydroxymethyluracil	5-ôÇ¼×»ùÄòà×à¤	1.041	C5H6N2O3	142.11	Nucleotide And Its Derivates	ºËÜÕËá¼°ÆäÑÜÉúÎï	"4433-40-3"	12250	23420	17360	17320	11000	21190	1.07109674813169	0.0990887991786	0.807934108403831	0.666666666666667	0.458963606520645
Com_286_neg	9-HpOTrE	9-ôÇ»ù¹ýÑõÊ®°ËÌ¼ÈýÏ©Ëá	10.92	C18H30O4	310.1	Fatty Acyls	Ö¬·¾õ£Àà	"111004-08-1"	302900	301700	281400	301800	297700	315800	0.967988637605157	-0.0469379818574	0.338075038828013	0.666666666666667	0.680668915361765
Com_287_neg	N-Acetylalanine	N-ÒÒõ£-L-±û°±Ëá	2.15	C5H9NO3	131.13	Amino Acid And Its Derivatives	°±»ùËá¼°ÆäÑÜÉúÎï	"97-69-8"	212400	303600	332400	253400	201900	209600	1.27598135057903	0.351607243191	0.230511305794982	0.888888888888889	0.923223165801872
Com_288_neg	Methyl beta-D-galactopyranoside	¼×»ù-¦Â-D-ßÁà«°ëÈéÌÇÜÕ	1.03	C7H14O6	194.182	Carbohydrates And Its Derivatives	ÌÇÀà¼°ÆäÑÜÉúÎï	"1824-94-8"	13690	10600	14280	5438	4515	8820	2.05454642305439	1.03881992897	0.0457288529210546	1	1.79803379141515
Com_289_neg	Lysops 22:6	ÈÜÑªÂÑÁ×Ö¬õ£Ë¿°±Ëá22:6	13.14	C28H44NO9P	569.62	Phospholipid	Á×Ö¬		84590	89120	92140	77210	59770	89550	1.17357524389706	0.230910343367	0.278306499471933	0.777777777777778	0.764118558787014
Com_28_neg	beta-Hydroxyisobutyrate	¦Â-ôÇ»ùÒì¶¡Ëá	2.4	C4H8O3	104.104	Organic Acid And Its Derivatives	ÓÐ»úËá¼°ÆäÑÜÉúÎï	"2068-83-9"	746800	484700	397000	379000	346100	515000	1.31320054834288	0.393087257439	0.330021411838775	0.777777777777778	0.672059870845907
Com_290_neg	Lysope 18:1	ÈÜÑªÂÑÁ×Ö¬õ£ÒÒ´¼°·18:1	12.81	C23H46NO7P	479.588	Phospholipid	Á×Ö¬		506500	652100	510900	479000	238800	603600	1.26343272286968	0.337348843573	0.399225859507358	0.777777777777778	0.934919000006636
Com_291_neg	Hydroxyglutaric acid	2-ôÇ»ù-Îì¶þËá	1.45	C5H8O5	148.11	Organic Acid And Its Derivatives	ÓÐ»úËá¼°ÆäÑÜÉúÎï	"13095-47-1"	119100	282100	208800	145500	212800	185200	1.12235510579577	0.166529207423	0.824657875339081	0.555555555555556	0.224771840193638
Com_292_neg	Hydroxypyruvic acid	3-ôÇ»ù-2-Ñõ´ú±ûËá	2.17	C3H4O4	104.061	Organic Acid And Its Derivatives	ÓÐ»úËá¼°ÆäÑÜÉúÎï	"1113-60-6"	6495000	1328000	3218000	4802000	5516000	3677000	0.788924615934262	-0.342040641814	0.461193426599511	0.666666666666667	0.540405728667468
Com_293_neg	IDP	¶þÁ×Ëá¼¡¸Ê	1.02	C10H13N4O15P3	522.149	Nucleotide And Its Derivates	ºËÜÕËá¼°ÆäÑÜÉúÎï	"86-04-4"	504700	514800	407800	3792000	1371000	1244000	0.222771968159825	-2.16636038798	0.0560100842587258	1	1.84283545128296
Com_294_neg	alpha-D-Galactose 1-phosphate	¦Á-D-°ëÈéÌÇ-1-Á×Ëá	0.87	C6H13O9P	260.136	Sugar Acids And Its Derivatives	ÌÇËá¼°ÆäÑÜÉúÎï	"2255-14-3"	194200000	59950000	46520000	141900000	158000000	49910000	0.859523741459649	-0.218390605023	0.695502314660001	0.555555555555556	0.488817410611925
Com_295_neg	Gamma-Glu-Leu	¦Ã-¹È°±Ëá-ÁÁ°±Ëá	5.09	C11H20N2O5	260.287	Organic Acid And Its Derivatives	ÓÐ»úËá¼°ÆäÑÜÉúÎï	"2566-39-4"	13580	17870	24930	11690	12660	20850	1.24734513274336	0.318860705268	0.423951773235804	0.777777777777778	0.790226680078503
Com_296_neg	N-Acetyl-D-glucosamine 6-phosphate	6-Á×Ëá-NÒÒõ£-D-°±»ùÆÏÌÑÌÇ	1.81	C8H16NO9P	301.188	Sugar Acids And Its Derivatives	ÌÇËá¼°ÆäÑÜÉúÎï		194000	217600	256900	153200	45860	83770	2.36361064950677	1.24099240426	0.101135365783369	1	1.70608544126073
Com_297_neg	Glycerol-3-phosphate	¸ÊÓÍÁ×Ëáõ¥	0.9	C3H9O6P	172.074	Fatty Acyls	Ö¬·¾õ£Àà	"57-03-4"	1896000	1240000	812500	2799000	2094000	16510000	0.184483483623791	-2.43843643394	0.169771583388727	1	0.794064483007015
Com_298_neg	DL-3,4-Dihydroxyphenyl glycol	DL-3,4-¶þôÇ»ù±½»ù¶þ´¼	7.37	C8H10O4	170.163	Benzene and substituted derivatives	±½¼°ÆäÑÜÉúÎï	"28822-73-3"	36710	38110	33360	37740	36220	33660	1.00520349377439	0.00748759069872	0.931599292296833	0.555555555555556	0.190501735574659
Com_299_pos	Lysopc 16:1	ÈÜÑªÂÑÁ×Ö¬õ£µ¨¼î16:1	11.75	C24H48NO7P	493.61	Phospholipid	Á×Ö¬		102400	118200	139800	84460	38030	117400	1.50235524615449	0.587225992124	0.270549777026747	0.888888888888889	0.804918022438026
Com_29_neg	Undecanedioic acid	Ê®Ò»Íé¶þËá	8.77	C11H20O4	216.27	Fatty Acyls	Ö¬·¾õ£Àà	"1852-04-6"	396800	421300	372700	425800	393500	391300	0.983644473814637	-0.0237911294722	0.724247099330645	0.444444444444444	0.389872409245574
Com_2_neg	2,3-Dinor-TXB2	2,3-¶þÕýÄýÑª¶ñÍé	0.97	C18H30O6	342.427	Eicosanoid	Ñõ»¯Ö¬ÖÊ	"63250-09-9"	61570	34490	27830	39390	33130	22850	1.29904582153717	0.377452320192	0.476275245018395	0.666666666666667	0.681825221180689
Com_300_pos	Lysopc 16:2 (2N Isomer)	ÈÜÑªÁ×Ö¬õ£µ¨¼î16:2	11.13	C24H46NO7P	491.308	Phospholipid	Á×Ö¬		5236	12050	6668	4992	3932	10460	1.23576145274453	0.305400277096	0.568872203342772	0.777777777777778	0.612872906760061
Com_301_pos	Lysopc 15:0	ÈÜÑªÁ×Ö¬õ£µ¨¼î15:0	12.93	C23H48NO7P	481.317	Phospholipid	Á×Ö¬		281000	463800	512100	626600	398200	376500	0.89695282951545	-0.156895978654	0.667737061371582	0.444444444444444	0.35120915226321
Com_302_pos	Lysopc 16:0	ÈÜÑªÂÑÁ×Ö¬õ£µ¨¼î16:0(2nÒì¹¹)	12.57	C24H50NO7P	495.63	Phospholipid	Á×Ö¬		4517000	4011000	4801000	3884000	2111000	4121000	1.31761565836299	0.397929605068	0.275830866426785	0.888888888888889	0.762812685227629
Com_303_pos	Lysopc 18:2	ÈÜÑªÂÑÁ×Ö¬õ£µ¨¼î18:2	12.16	C26H50NO7P	519.65	Phospholipid	Á×Ö¬		4597000	8962000	5546000	4873000	3476000	3910000	1.55844685537156	0.640108958429	0.162060110697474	0.888888888888889	1.28403424019819
Com_304_pos	Lysopc 18:3	ÈÜÑªÁ×Ö¬õ£µ¨¼î18:3	12.57	C26H48NO7P	517.317	Phospholipid	Á×Ö¬		1658000	1493000	1799000	1407000	825700	1463000	1.33939443136618	0.421580875061	0.218480987955583	1	0.744944048232881
Com_305_pos	Lysopc 17:0	ÈÜÑªÁ×Ö¬õ£µ¨¼î17:0	13.17	C25H52NO7P	509.657	Phospholipid	Á×Ö¬	"50930-23-9"	21460	37110	40370	34020	21090	30310	1.1582767501756	0.211980001516	0.625395940533925	0.777777777777778	0.479525060801958
Com_306_pos	Lysopc 18:1	ÈÜÑªÂÑÁ×Ö¬õ£µ¨¼î18:1	12.9	C26H52NO7P	521.667	Phospholipid	Á×Ö¬	"3542-29-8"	3055000	6698000	4143000	4747000	2681000	5182000	1.10198255352895	0.140101383495	0.799417024123469	0.444444444444444	0.40559058407131
Com_307_pos	Lysine Butyrate	Àµ°±Ëá¶¡Ëá	0.9	C10H22N2O4	234.293	Amino Acid And Its Derivatives	°±»ùËá¼°ÆäÑÜÉúÎï	"80407-71-2"	3572000	6554000	9126000	3884000	2585000	9627000	1.19607355864811	0.258306118159	0.611204461313394	0.555555555555556	0.592861984019624
Com_308_pos	Lysopc 14:0	ÈÜÑªÂÑÁ×Ö¬õ£µ¨¼î14:0	11.37	C22H46NO7P	467.577	Phospholipid	Á×Ö¬	"20559-16-4"	48540	58860	60480	25450	15390	44680	1.96304957904584	0.973096610165	0.125167961102432	1	1.36734092730453
Com_309_pos	Isovalerylcarnitine	ÒìÎìÈâ¼î	5.66	C12H23NO4	245.32	Carnitine	Èâ¼îÀà	"31023-24-2"	3168000	2376000	1560000	1345000	2880000	1742000	1.19054801407743	0.251625804795	0.57629404700885	0.666666666666667	0.74840656213971
Com_30_neg	Nonadecanoic acid	ÕýÌ¼Ê®¾ÅËá	18.28	C19H38O2	298.5	Fatty Acyls	Ö¬·¾õ£Àà	"646-30-0"	650700	657000	513500	858600	1022000	828800	0.672178342068355	-0.573084035868	0.0197174626052113	1	1.80709474207978
Com_310_pos	3-Hydroxy-butyryl carnitine	3-ôÇ»ù¶¡õ£»ùÈâ¼î	1.91	C11H21NO5	247.291	Carnitine	Èâ¼îÀà	"1469900-92-2"	825400	165500	195200	479300	428300	676300	0.748847780794242	-0.41725560479	0.395355027060601	0.666666666666667	0.649734127426746
Com_311_pos	Arachidonoylcarnitine	»¨ÉúËÄÏ©ËáÈâ¼î	11.42	C27H46NO4	448.668	Carnitine	Èâ¼îÀà	"36816-11-2"	301100	263700	179100	314600	207400	256900	0.955064835023751	-0.0663294203858	0.795320455000899	0.444444444444444	0.215464946826245
Com_312_pos	Carnitine-C3	Èâ¶¾¼î-C3	2.56	C10H17NO4	217.3	Carnitine	Èâ¼îÀà		6429000	3999000	2777000	3222000	4023000	4352000	1.13865654910753	0.187332655194	0.784982014348521	0.555555555555556	0.404962682020073
Com_313_pos	Carnitine-C4	Èâ¶¾¼î-C4	4.63	C11H21NO4	231.3	Carnitine	Èâ¼îÀà		18750000	9233000	11730000	18050000	22930000	13790000	0.725086726310024	-0.463774531299	0.254950723582306	0.777777777777778	0.89264547889969
Com_314_pos	Cycloleucine	»·ÁÁ°±Ëá	0.84	C6H11NO2	129.157	Amino Acid And Its Derivatives	°±»ùËá¼°ÆäÑÜÉúÎï	"52-52-8"	19470000	30860000	30100000	23830000	19440000	22780000	1.21771385314156	0.28417515857	0.357144504263184	0.777777777777778	1.03928373952004
Com_315_pos	cis-gondoic acid	»¨ÉúÓÍËá	16.03	C20H38O2	310.515	Fatty Acyls	Ö¬·¾õ£Àà	"26764-41-0"	311700	579600	545300	1071000	621500	701000	0.600208899101734	-0.736463385423	0.116360315570451	1	1.17787175172897
Com_316_pos	Pantethine	D-·ºÁòÒÒ°·	0.85	C22H42N4O8S2	554.721	Amino Acid And Its Derivatives	°±»ùËá¼°ÆäÑÜÉúÎï	"16816-67-4"	4803	11724	11808	8234	6304	8084	1.25254177349483	0.324858719515	0.664229365853066	0.666666666666667	0.599125345646889
Com_317_pos	D-Myo-inositol 4,5-bisphosohate	D-ÏËÎ¬´¼-4,5-¶þÁ×Ëá	0.97	C6H14O12P2	340.116	Alcohols and polyols	´¼Àà¼°Æä¶àÔª´¼	"47055-78-7"	151100	115200	105600	157300	142900	155300	0.816465422612514	-0.292536306077	0.179188025154614	0.888888888888889	0.910411642426901
Com_318_pos	Glu-Glu	¹È°±õ£-¹È°±Ëá	1.0	C10H16N2O7	276.243	Amino Acid And Its Derivatives	°±»ùËá¼°ÆäÑÜÉúÎï	"3929-61-1"	204300	69430	93330	595700	949200	198700	0.210518467538426	-2.24798129695	0.0659311392306365	0.888888888888889	1.64108806436026
Com_319_pos	Ectoine	ÒÀ¿Ë¶àÒò	0.95	C6H10N2O2	142.156	Others	ÆäËü	"96702-03-3"	525400	483600	479400	2340000	1726000	1161000	0.284752247943371	-1.81222086372	0.0247337951069147	1	2.00454615407363
Com_31_neg	Monobutyl phthalate	ÁÚ±½¶þ¼×Ëáµ¥¶¡õ¥	9.719	C12H14O4	222.24	Organic Acid And Its Derivatives	ÓÐ»úËá¼°ÆäÑÜÉúÎï	"131-70-4"	147100	157900	152500	152000	161200	155400	0.976312419974392	-0.0345852108044	0.419015477011779	0.666666666666667	0.495347626155426
Com_320_pos	Cadaverine	1,5-¶þ°±»ùÎìÍé	0.706	C5H14N2	102.18	Polyamine	¶à°·	"462-94-2"	12420	16670	6926	7834	10290	16300	1.04624680455496	0.0652232165058	0.935053883154009	0.555555555555556	0.166669490061126
Com_321_pos	N-Acetylneuraminic acid	N-ÒÒõ£Éñ¾­°±Ëá	0.988	C11H19NO9	309.27	Amino Acid And Its Derivatives	°±»ùËá¼°ÆäÑÜÉúÎï	"131-48-6"	118400	50830	53100	99290	48240	147100	0.754607473780674	-0.406201705933	0.571238395507032	0.555555555555556	0.598650996960828
Com_322_pos	Palmitoylethanolamide	×ØéµÒÒ´¼°·	14.399	C18H37NO2	299.49	Organic Acid And Its Derivatives	ÓÐ»úËá¼°ÆäÑÜÉúÎï	"544-31-0"	28850	37540	32390	25620	27420	33580	1.1403832833064	0.189518796311	0.30105345220107	0.777777777777778	0.759451222974281
Com_323_pos	Dehydrocholic acid	¶ìÈ¥Çâµ¨Ëá	12.273	C24H34O5	402.52	Bile Acids	µ¨Ö­Ëá	"81-23-2"	10920	9693	6498	6055	8430	9548	1.12807389838971	0.17386157957	0.610273950065611	0.777777777777778	0.528780014662833
Com_324_pos	Uracil	Äòà×à¤	1.47	C4H4N2O2	112.09	Nucleotide And Its Derivates	ºËÜÕËá¼°ÆäÑÜÉúÎï	"66-22-8"	130945	120300	229500	110478	138000	159900	1.17720592196445	0.235366704923	0.606490801760732	0.444444444444444	0.55172528365197
Com_325_pos	Estradiol Benzoate	±½¼×Ëá´Æ¶þ´¼	14.023	C25H28O3	376.49	Hormones	¼¤ËØ	"50-50-0"	9351	2866	1792	1831	9236	3348	0.971834894207423	-0.0412168608308	0.939709849037733	0.555555555555556	0.478208208154241
Com_326_pos	L-Tryptophan	L-É«°±Ëá	4.894	C11H12N2O2	204.23	Amino Acid And Its Derivatives	°±»ùËá¼°ÆäÑÜÉúÎï	"73-22-3"	44700000	32490000	40090000	38400000	23990000	26720000	1.31612613623611	0.396297762175	0.178382911084011	0.888888888888889	1.22653895274472
Com_327_pos	Erucamide	½æËáõ£°·	16.97	C22H43NO	337.6	Fatty Acyls	Ö¬·¾õ£Àà	"112-84-5"	48040000	48980000	44610000	47490000	54970000	48520000	0.938071267717579	-0.092230562683	0.320192849682722	0.666666666666667	1.04224365964413
Com_328_pos	Hexadecanamide	Ê®ÁùÌ¼õ£°·	14.82	C16H33NO	255.44	Fatty Acyls	Ö¬·¾õ£Àà	"629-54-9"	12020000	18830000	18050000	31770000	22740000	25360000	0.612244897959184	-0.707819248507	0.0519825823594629	1	1.37675502514472
Com_329_pos	N-Lauryldiethanolamine	Ê®¶þÍé»ùÒÒ´¼°·	9.45	C16H35NO2	273.45	Amines	°·Àà	"1541-67-9"	27120	26980	25190	27570	22450	23230	1.08245733788396	0.114310166166	0.323262814629599	0.666666666666667	1.06663421399522
Com_32_neg	D-Ribose	D-ºËÌÇ	0.92	C5H10O5	150.13	Carbohydrates And Its Derivatives	ÌÇÀà¼°ÆäÑÜÉúÎï	"50-69-1"	68100	65870	48390	55930	49860	61830	1.08793700035795	0.121595016237	0.581169007506044	0.666666666666667	0.442098930251848
Com_330_pos	2-Aminoethylphosphonate	2-°±»ùÒÒ»ùÁ×Ëáõ¥	0.98	C2H8NO3P	125.06	Organic Acid And Its Derivatives	ÓÐ»úËá¼°ÆäÑÜÉúÎï	"2041-14-7"	993600	718100	874500	1160000	975800	1173000	0.781612669245648	-0.355474242589	0.0996639050459526	0.888888888888889	1.6108623882256
Com_331_pos	6-Methylmercaptopurine	6-¼×»ùÛÏàÑßÊ	4.04	C6H6N4S	166.21	Purines and purine derivatives	àÑßÊ¼°ÆäÑÜÉúÎï	"50-66-8"	8590000	5758000	9444000	10130000	5339000	5783000	1.11951816299642	0.162877934579	0.626065686153467	0.555555555555556	0.551433698036735
Com_332_pos	2-Hydroxycinnamate	2-ôÇ»ùÈâ¹ðËá	1.81	C9H8O3	164.16	Cinnamic acids and derivatives	Èâ¹ðËá¼°ÆäÑÜÉúÎï	"614-60-8"	2618000	2964000	3231000	3057000	1538000	1739000	1.39137985475213	0.476516337748	0.213825057091995	0.777777777777778	1.24854125811946
Com_333_pos	Piperidine	ßßà¤	2.04	C5H11N	85.15	Organoheterocyclic compounds	ÓÐ»úÔÓ»·»¯ºÏÎï	"110-89-4"	446200	193100	573400	511700	210900	281600	1.20762796255726	0.272176067873	0.720322457382264	0.555555555555556	0.400514475443993
Com_334_pos	Isoquinoline	Òìà­ßø	4.9	C9H7N	129.16	Organoheterocyclic compounds	ÓÐ»úÔÓ»·»¯ºÏÎï	"119-65-3"	31070	22370	23700	21860	18110	18790	1.31279782164738	0.392644750072	0.102673931507952	1	1.1297562958173
Com_335_pos	Purine	àÑßÊ	4.1	C5H4N4	120.112	Nucleotide And Its Derivates	ºËÜÕËá¼°ÆäÑÜÉúÎï	"120-73-0"	42370	35150	49680	56350	32090	32990	1.04751708803426	0.0669737786465	0.753001260520941	0.666666666666667	0.409473894536288
Com_336_pos	S-Methyl-5'-thioadenosine	S-¼×»ù-5'-ÁòÏÙàÑßÊ	4.94	C11H15N5O3S	297.333	Nucleotide And Its Derivates	ºËÜÕËá¼°ÆäÑÜÉúÎï		856400	726500	823900	820200	903600	723000	0.983652117050842	-0.0237799193079	0.865431040829442	0.555555555555556	0.186805884244725
Com_337_pos	Isobutyrylglycine	2-(Òì¶¡»ù°±»ù)ÒÒËá	0.63	C6H11NO3	145.156	Organic Acid And Its Derivatives	ÓÐ»úËá¼°ÆäÑÜÉúÎï	"15926-18-8"	12300000	13590000	12800000	13850000	11190000	19390000	0.870808012604096	-0.199573412567	0.554403906952009	0.666666666666667	0.579485131651887
Com_338_pos	(5-L-Glutamyl)-L-Amino Acid	5-L-¹È°±õ£-L-±û°±Ëá	1.18	C8H14N2O5	218.207	Amino Acid And Its Derivatives	°±»ùËá¼°ÆäÑÜÉúÎï	"5875-41-2"	453300	679400	585000	353900	672600	90360	1.53797253012911	0.621029735419	0.353656909311862	0.777777777777778	0.916132768062803
Com_339_pos	Fexofenadine	·ÇË÷·ÇÄÇ¶¨	12.04	C32H39NO4	501.656	Others	ÆäËü	"83799-24-0"	679500	1246000	809600	762500	483700	526800	1.54263959390863	0.625401045179	0.143471356959922	0.888888888888889	1.32105950735587
Com_33_neg	2-Hydroxy-3-methylbutanoic acid	2-ôÇ»ù-3-¼×»ù¶¡Ëá	4.932	C5H10O3	118.13	Fatty Acyls	Ö¬·¾õ£Àà	"4026-18-0"	183400	224700	285700	214300	236000	170000	1.11849105271643	0.161553715715	0.552769179178328	0.666666666666667	0.458039655350294
Com_340_pos	Feruloylcholine	°¢Îºõ£µ¨¼î	14.42	C15H22NO4	280.34	Cholines	µ¨¼îÀà		581400	703900	781500	908500	703000	713900	0.888793325879419	-0.170080111595	0.38037604595274	0.666666666666667	0.779477429532479
Com_341_pos	Gly-Phe	¸Ê°±õ£-±½±û°±Ëá	4.88	C11H14N2O3	222.24	Amino Acid And Its Derivatives	°±»ùËá¼°ÆäÑÜÉúÎï	"3321-03-7"	297200	179400	474600	165100	142300	159200	2.03857693956279	1.02756240776	0.148234416659965	1	1.50221050102965
Com_342_pos	Glycerol 1-hexadecanoate	µ¥×ØéµËá¸ÊÓÍõ¥	13.72	C19H38O4	330.503	Glycerolipids	¸ÊÓÍÖ¬Àà	"542-44-9"	29210	35370	23430	36780	59720	40000	0.644761904761905	-0.633161588978	0.0911908504095905	1	1.23113854704274
Com_343_pos	gamma-Muurolene	¦Ã-Ä¾ÂÞÏ©	4.87	C15H24	204.351	Fatty Acyls	Ö¬·¾õ£Àà	"24268-39-1"	244700	187700	222100	217100	122400	145400	1.34976283769849	0.432705938436	0.187838129415185	0.888888888888889	1.30352224914592
Com_344_pos	Galactinol	¼¡´¼°ëÈéÌÇÜÕ	0.95	C12H22O11	342.297	Carbohydrates And Its Derivatives	ÌÇÀà¼°ÆäÑÜÉúÎï	"3687-64-7"	76420	92160	60720	116000	36690	46150	1.15318849326091	0.205628346526	0.545542906405428	0.666666666666667	0.483573820605978
Com_345_pos	Flavin Adenine Dinucleotide	»ÆËØÏÙàÑßÊ¶þºËÜÕËá	5.14	C27H33N9O15P2	785.55	Nucleotide And Its Derivates	ºËÜÕËá¼°ÆäÑÜÉúÎï	"146-14-5"	23050	17990	18140	18310	17900	21500	1.02547218852885	0.0362883655227	0.838896448919755	0.444444444444444	0.206288921223257
Com_346_pos	3-Hydroxy-3-Methylpentane-1,5-Dioic Acid	3-ôÇ»ù-3-¼×»ù¹È°±Ëá	0.87	C6H10O5	162.14	Fatty Acyls	Ö¬·¾õ£Àà	"503-49-1"	3151000	3512000	2554000	3576000	4405000	3175000	0.826192183578344	-0.275450683648	0.228129768719723	0.888888888888889	0.895635805084288
Com_347_pos	Oxidized glutathione	Ñõ»¯¹Èë×¸ÊëÄ	1.78	C20H32N6O12S2	612.6	Amino Acid And Its Derivatives	°±»ùËá¼°ÆäÑÜÉúÎï	"121-24-4"	183400	303400	216000	189900	247000	267800	0.997303817227189	-0.00389502272498	0.939553702348044	0.555555555555556	0.0311746879556208
Com_348_pos	7,8-Dihydrofolate	7,8-¶þÇâÒ¶Ëá	0.8	C19H21N7O6	443.41	Organic Acid And Its Derivatives	ÓÐ»úËá¼°ÆäÑÜÉúÎï	"4033-27-6"	20430	12700	23060	4882	9377	19100	1.68440300968254	0.752237358422	0.241748053456386	0.888888888888889	1.26110430381735
Com_349_pos	6-Deoxy-D-glucose	6-ÍÑÑõ-D-ÆÏÌÑÌÇ	1.825	C6H12O5	164.156	Carbohydrates And Its Derivatives	ÌÇÀà¼°ÆäÑÜÉúÎï	"7658-08-4"	541000	518300	587600	652600	286700	341400	1.28593737799641	0.362820388658	0.333566509206915	0.666666666666667	1.02521399328087
Com_34_neg	orotidine-5-phosphate	ÈéÇåËáºËÜÕ-5-Á×Ëá	2.75	C10H13N2O11P	368.19	Nucleotide And Its Derivates	ºËÜÕËá¼°ÆäÑÜÉúÎï		804500	1023000	419600	599900	792200	383300	1.2656866058353	0.33992022611	0.566246263319293	0.777777777777778	0.413062631610683
Com_350_pos	5-Aminopentanoate	5-°±»ùÎìËá	0.96	C5H11NO2	117.146	Organic Acid And Its Derivatives	ÓÐ»úËá¼°ÆäÑÜÉúÎï	"660-88-8"	94610	243400	178200	353600	288600	209200	0.60630725863284	-0.721879000585	0.178357403150557	0.888888888888889	1.30505033961543
Com_351_pos	5-Hydroxylysine	5-ôÇ»ùÀµ°±Ëá	0.72	C6H15ClN2O3	198.65	Amino Acid And Its Derivatives	°±»ùËá¼°ÆäÑÜÉúÎï	"13204-98-3"	95480	109300	129700	80500	79960	121100	1.1879528342094	0.248477557348	0.332956540185356	0.777777777777778	1.05652204061182
Com_352_pos	5-Methoxyindole-3-acetic acid	5-¼×Ñõ»ùßÅßá-3-ÒÒËá	4.87	C11H11NO3	205.21	Indole And Its Derivatives	ßÅßá¼°ÆäÑÜÉúÎï	"3471-31-6"	495400	338000	435800	430000	273100	291000	1.27673272306609	0.352456536422	0.238443515263023	0.888888888888889	1.13879995036691
Com_353_pos	Pyridoxamine	ßÁ¶ß°·	1.0	C8H12N2O2	168.193	Pyridine And Its Derivatives	ßÁà¤¼°ÆäÑÜÉúÎï	"85-87-0"	63070	105500	89360	113400	67420	119700	0.858278983095967	-0.220481423727	0.578961728731717	0.777777777777778	0.69892643772877
Com_354_pos	5beta-Androstan-17beta-ol-3-one	5¦Â-ÐÛçÞÍé-17¦Â-´¼-3-Íª	0.84	C19H30O2	290.44	Hormones	¼¤ËØ	"571-22-2"	902800	781100	722600	948700	1050000	942400	0.818231274013124	-0.289419414663	0.0690464855362606	1	1.67327568146057
Com_355_pos	Etiocholanolone	3a-ôÇ»ù-5b-ÐÛçÞÍé-17-Íª	0.68	C19H30O2	290.44	Hormones	¼¤ËØ	"53-42-9"	310600	324300	275900	324900	404200	389700	0.814086521272792	-0.29674596234	0.0769811845926113	1	1.64378302950208
Com_356_pos	5beta-Androstan-3beta-ol-17-one	5¦Â-ÐÛçÞÍé-3¦Â-ôÇ»ù-17Íª	0.68	C19H30O2	290.44	Hormones	¼¤ËØ	"571-31-3"	281300	280800	207000	228400	311700	341900	0.871995464852608	-0.197607463155	0.452504240493933	0.777777777777778	0.883172938927161
Com_357_pos	Sarcosine	¼¡°±Ëá	0.9	C3H7NO2	89.093	Amino Acid And Its Derivatives	°±»ùËá¼°ÆäÑÜÉúÎï	"107-97-1"	17510000	17280000	19780000	17920000	13950000	17330000	1.10914634146341	0.149449728146	0.312544410983389	0.666666666666667	0.89774601142027
Com_358_pos	S-Adenosyl-methionine	S-ÏÙÜÕ-¼×Áò°±Ëá	0.84	C22H30N6O8S2	570.639	Amino Acid And Its Derivatives	°±»ùËá¼°ÆäÑÜÉúÎï	"17176-17-9"	4266000	4233000	5001000	4340000	5925000	4062000	0.942276819990228	-0.0857771410378	0.732215536357871	0.555555555555556	0.318719612656918
Com_359_pos	Vitamin B2	ºË»ÆËØB2	5.94	C17H20N4O6	376.364	Vitamins	Î¬ÉúËØ	"83-88-5"	51520	49980	48520	43540	42190	46500	1.13453830446949	0.182105318341	0.027498078492923	1	1.45969297006941
Com_35_neg	2-Oxoadipic acid	2-Ñõ´ú¼º¶þËá	8.05	C6H8O5	160.125	Organic Acid And Its Derivatives	ÓÐ»úËá¼°ÆäÑÜÉúÎï	"3184-35-8"	1896000	1847000	1927000	1374000	1763000	996500	1.37171888230313	0.455984848375	0.172965407720359	1	1.21481640060436
Com_360_pos	R-Aminobutyrate	R-3-°±»ù¶¡Ëá	0.91	C4H9NO2	103.12	Organic Acid And Its Derivatives	ÓÐ»úËá¼°ÆäÑÜÉúÎï	"3775-73-3"	65740	89590	90590	90500	43280	65000	1.23714659422477	0.307016460889	0.377896666140285	0.777777777777778	0.878867341673418
Com_361_pos	S-ribosyl-L-homocysteine	S-ºËÌÇ»ù-L-Í¬ÐÍ°ëë×°±Ëá	3.14	C9H17NO6S	267.3	Amino Acid And Its Derivatives	°±»ùËá¼°ÆäÑÜÉúÎï		334900	253800	256100	282800	307900	265200	0.987031195233088	-0.0188324129444	0.858099568120802	0.666666666666667	0.493830335966741
Com_362_pos	Spermidine	ÑÇ¾«°·	0.68	C7H19N3	145.246	Polyamine	¶à°·	"124-20-9"	3686000	4301000	3818000	4179000	3478000	5782000	0.878413572438425	-0.187027749175	0.544641503112159	0.555555555555556	0.546855283952972
Com_363_pos	5-Aminolevulinate	5-°±»ùÒÒõ£±ûËá	2.07	C5H9NO3	131.13	Organic Acid And Its Derivatives	ÓÐ»úËá¼°ÆäÑÜÉúÎï	"106-60-5"	240400	121800	342800	300300	141500	165300	1.16125844177236	0.215689084323	0.771200743892686	0.555555555555556	0.358437276613253
Com_364_pos	5-Aminosalicylate	5-°±»ùË®ÑîËá	1.68	C7H7NO3	153.135	Organic Acid And Its Derivatives	ÓÐ»úËá¼°ÆäÑÜÉúÎï	"89-57-6"	402400	628800	767300	334500	346000	385400	1.68730650154799	0.75472206497	0.11770585049977	1	1.47027688636702
Com_365_pos	N-(5-Aminopentyl)acetamide	N-(5-°±»ùÎì»ù)ÒÒõ£°·	1.01	C7H16N2O	144.21	Polyamine	¶à°·	"32343-73-0"	39530	23730	16370	38890	45200	20610	0.760553963705826	-0.394877479536	0.460927147158742	0.666666666666667	0.862636350470181
Com_366_pos	H-Trp-NH2.HCl	L-É«°±õ£°·ÑÎËáÑÎ	4.587	C11H14ClN3O	239.7	Amino Acid And Its Derivatives	°±»ùËá¼°ÆäÑÜÉúÎï	"5022-65-1"	23750	36870	69040	32400	36720	12470	1.58916533888957	0.668269232419	0.36732849587705	0.777777777777778	0.682388658404703
Com_367_pos	Methylguanidine HCl	1-¼×»ùëÒÑÎËáÑÎ	0.88	C2H8ClN3	109.56	Organic Acid And Its Derivatives	ÓÐ»úËá¼°ÆäÑÜÉúÎï	"21770-81-0"	95170	52530	127400	128000	65830	84250	0.989283659378596	-0.0155438476108	0.917156941681461	0.444444444444444	0.20633883193886
Com_368_pos	beta-Alanine methyl ester	3-°±»ù±ûËá¼×õ¥	0.98	C4H9NO2	103.12	Amino Acid And Its Derivatives	°±»ùËá¼°ÆäÑÜÉúÎï	"4138-35-6"	394300	554100	522900	417900	279200	375900	1.37120223671948	0.455441367904	0.118281540776446	0.888888888888889	1.20005425717463
Com_369_pos	Dihydrouracil	¶þÇâÄòà×à¤	6.15	C4H6N2O2	114.103	Pyrimidines and pyrimidine derivatives	à×à¤¼°ÆäÑÜÉúÎï	"504-07-4"	21180	13270	44730	18000	8550	32350	1.34431239388795	0.426868433312	0.58686336430125	0.666666666666667	0.65118548631287
Com_36_neg	Phosphonotyrosine	O-Á×ËáÀÒ°±Ëá	0.94	C9H12NO6P	261.168	Amino Acid And Its Derivatives	°±»ùËá¼°ÆäÑÜÉúÎï	"21820-51-9"	89630	79870	95790	109900	128000	144200	0.694294687254645	-0.526379962914	0.0240120123923815	1	1.81900462124954
Com_370_pos	Imidazoleacetic acid	ßäßòÒÒËá	0.91	C5H6N2O2	126.113	Organic Acid And Its Derivatives	ÓÐ»úËá¼°ÆäÑÜÉúÎï	"645-65-8"	3522000	804500	637100	2409000	3932000	975300	0.678430354140754	-0.559727374885	0.467189913280046	0.777777777777778	0.795350718376394
Com_371_pos	1D-chiro-Inositol	D-ÊÖÐÔ¼¡´¼	18.32	C6H12O6	180.156	Phenols And Its Derivatives	·ÓÀà¼°ÆäÑÜÉúÎï	"643-12-9"	1452000	1474000	1532000	1122000	1016000	1044000	1.40100565681961	0.486462780929	0.00189566358421917	1	1.97301848144392
Com_372_pos	Isoproterenol	Òì±ûÉöÉÏÏÙËØ	8.36	C11H17NO3	211.258	Hormones	¼¤ËØ	"7683-59-2"	186000	181300	141800	180100	189500	165000	0.952300785634119	-0.0705107719793	0.61016274288207	0.444444444444444	0.646311459870862
Com_373_pos	L-(-)-alpha-Amino-epsilon-Caprolactam	3-°±»ùÁùÇâ-2H-µªÔÓ×¿-2-Íª	0.7	C6H12N2O	128.172	Amino Acid And Its Derivatives	°±»ùËá¼°ÆäÑÜÉúÎï	"21568-87-6"	643800	488300	681700	346900	610900	625200	1.14579911560328	0.196354129324	0.515274236394457	0.777777777777778	0.385369675358983
Com_374_pos	L-Alanyl-L-leucine	L-±û°±õ£-L-ÁÁ°±Ëá	4.45	C9H18N2O3	202.251	Amino Acid And Its Derivatives	°±»ùËá¼°ÆäÑÜÉúÎï	"3303-34-2"	580200	251700	643000	119700	141900	125300	3.81209614887568	1.93058450743	0.0475555435019788	1	1.82731821828336
Com_375_pos	Ip7G	ÒìÎìÏ©»ù-7-ÆÏÌÇÜÕ	0.96	C16H23N5O5	365.384	Nucleotide And Its Derivates	ºËÜÕËá¼°ÆäÑÜÉúÎï	"59384-58-6"	18200	27230	14290	17660	22640	11110	1.16164170394865	0.216165153384	0.609639875704426	0.666666666666667	0.516328275290399
Com_376_pos	Isobutyryl carnitine	Òì¶¡õ£Èâ¼î	4.62	C11H21NO4	231.289	Carnitine	Èâ¼îÀà	"25518-49-4"	14980000	8072000	9626000	15260000	19920000	11870000	0.694537725823592	-0.525875034402	0.189710896953462	0.888888888888889	0.981054446769663
Com_377_pos	beta amino butyric acid	¦Â-°±»ù¶¡Ëá	0.98	C4H9NO2	103.12	Amino Acid And Its Derivatives	°±»ùËá¼°ÆäÑÜÉúÎï	"541-48-0"	476200	616600	748200	395500	568600	183800	1.60379824026483	0.681492660448	0.230736872775728	0.888888888888889	1.16887466938392
Com_378_pos	Adenine	ÏÙàÑßÊ	1.032	C5H5N5	135.127	Nucleotide And Its Derivates	ºËÜÕËá¼°ÆäÑÜÉúÎï	"73-24-5"	698500	572900	478400	2933000	3256000	2199000	0.2086075345732	-2.26113682823	0.000631868154074421	1	1.81970298654141
Com_379_pos	4-Pregnen-17alpha,20alpha-Diol-3-One	4-ÔÐÍé-17¦Á,20¦Á-¶þ´¼-3-Íª	0.87	C21H32O3	332.477	Hormones	¼¤ËØ	"652-69-7"	220500	166100	139700	205000	223000	160600	0.894155623513422	-0.161402147448	0.510499244873219	0.666666666666667	0.787776287516582
Com_37_neg	O-Desmethylnaproxen	(S)-2-(6-ôÇ»ù-2-ÝÁ)±ûËá	11.86	C13H12O3	216.233	Benzene and substituted derivatives	±½¼°ÆäÑÜÉúÎï	"52079-10-4"	18070	24050	23410	16230	17720	26250	1.08853820598007	0.122392044743	0.60330167374875	0.666666666666667	0.561540967226323
Com_380_pos	11-Ketoetiocholanolone	11-Íª±¾µ¨Íé´¼Íª	15.04	C19H28O3	304.424	Hormones	¼¤ËØ	"739-27-5"	103600	97960	100200	104500	58280	98020	1.15705521472393	0.210457711557	0.43841770193565	0.555555555555556	0.744504369900211
Com_381_pos	H-Gly-Pro-OH	¸Ê°±õ£-L-¸¬°±Ëá	1.035	C7H12N2O3	172.18	Amino Acid And Its Derivatives	°±»ùËá¼°ÆäÑÜÉúÎï	"704-15-4"	228000	136700	328600	147900	143900	155400	1.55031305903399	0.632559572346	0.27622438055292	0.666666666666667	1.17506849840795
Com_382_pos	L-Homocitrulline	L-¸ß¹Ï°±Ëá	0.972	C7H15N3O3	189.21	Amino Acid And Its Derivatives	°±»ùËá¼°ÆäÑÜÉúÎï	"1190-49-4"	176800	184500	179300	232300	178600	252100	0.815384615384615	-0.294447358465	0.201936331091167	0.777777777777778	1.26617807663536
Com_383_pos	Glycyl-L-leucine	N-¸Ê°±õ£-L-ÁÁ°±Ëá	4.466	C8H16N2O3	188.22	Amino Acid And Its Derivatives	°±»ùËá¼°ÆäÑÜÉúÎï	"869-19-2"	394900	301900	693400	251200	166500	199600	2.2520654462984	1.17124875356	0.0703763766556491	1	1.68679291203234
Com_384_pos	5-Methylcytosine	5-¼×»ù°ûà×à¤	0.991	C5H7N3O	125.13	Nucleotide And Its Derivates	ºËÜÕËá¼°ÆäÑÜÉúÎï	"554-01-8"	539200	424900	545700	661200	619100	671100	0.773700932663729	-0.37015208193	0.07367598744493	1	1.79753762087838
Com_385_pos	D-Proline	D-¸¬°±Ëá	0.967	C5H9NO2	115.13	Amino Acid And Its Derivatives	°±»ùËá¼°ÆäÑÜÉúÎï	"344-25-2"	61310000	73130000	60960000	55690000	30350000	39210000	1.56007984031936	0.641619863886	0.10308553429593	1	1.61333518395271
Com_386_pos	L-Hydroxyproline	L-ôÇ¸¬°±Ëá	0.88	C5H9NO3	131.13	Amino Acid And Its Derivatives	°±»ùËá¼°ÆäÑÜÉúÎï	"51-35-4"	37260000	37050000	34490000	36190000	37960000	31820000	1.02670567141644	0.0380226595076	0.660077355774362	0.555555555555556	0.559203038451399
Com_387_pos	Glycyl-L-valine	¸Ê°±õ£-L-çÓ°±Ëá	2.077	C7H14N2O3	174.2	Amino Acid And Its Derivatives	°±»ùËá¼°ÆäÑÜÉúÎï	"1963-21-9"	286200	132000	392100	124600	154800	78720	2.2626493912655	1.17801304918	0.130478901920219	0.888888888888889	1.30501067160598
Com_388_pos	N6-Acetyl-L-lysine	N6-ÒÒõ£-L-Àµ°±Ëá	1.304	C8H16N2O3	188.22	Amino Acid And Its Derivatives	°±»ùËá¼°ÆäÑÜÉúÎï	"692-04-6"	1227000	579000	767600	779000	559500	1286000	0.980605829681844	-0.0282547564454	0.978989304642323	0.555555555555556	0.0515991446199453
Com_389_pos	N,N-Dimethylglycine	N,N-¶þ¼×»ù¸Ê°±Ëá	0.9	C4H9NO2	103.12	Amino Acid And Its Derivatives	°±»ùËá¼°ÆäÑÜÉúÎï	"1118-68-9"	1863000	1868000	1543000	1825000	1405000	1973000	1.01364597347684	0.0195538638879	0.878641434156813	0.555555555555556	0.141048950490369
Com_38_neg	Nelarabine	ÄÎÀ­±õ	4.11	C11H15N5O5	297.267	Others	ÆäËü	"121032-29-9"	170600	190600	205800	210700	174800	176800	1.00835852747644	0.0120086882888	0.916369199961872	0.444444444444444	0.317703008946301
Com_390_pos	Guanosine monophosphate	ÄñÜÕµ¥Á×Ëá	1.01	C10H14N5O8P	363.058	Nucleotide And Its Derivates	ºËÜÕËá¼°ÆäÑÜÉúÎï		14310000	13960000	21480000	1552000	6264000	7514000	3.24527071102414	1.69833882866	0.103129417508224	1	1.2158049366677
Com_391_pos	Diethylglutarate	Îì¶þËá¶þÒÒõ¥	0.67	C9H16O4	188.105	Organic Acid And Its Derivatives	ÓÐ»úËá¼°ÆäÑÜÉúÎï	"818-38-2"	18220000	14190000	12580000	13780000	15370000	14130000	1.0395101663586	0.0559038677522	0.827222379528818	0.555555555555556	0.414858192047084
Com_392_pos	5-Hydroxyindoleacetate	5-ôÇ»ùßÅßá-3-ÒÒËá	5.58	C10H9NO3	191.058	Indole And Its Derivatives	ßÅßá¼°ÆäÑÜÉúÎï	"54-16-0"	49300	44750	71710	34470	35030	43810	1.46288941840967	0.548820718525	0.109338879800951	1	1.20275479172221
Com_393_pos	D-Phenylalanine	D-±½±û°±Ëá	4.106	C9H11NO2	165.19	Amino Acid And Its Derivatives	°±»ùËá¼°ÆäÑÜÉúÎï	"673-06-3"	210400000	141900000	228200000	247900000	135000000	144300000	1.10110015174507	0.138945696745	0.661806961092586	0.555555555555556	0.50547284815877
Com_394_pos	Uridine	ÄòÜÕ	1.86	C9H12N2O6	244.2	Nucleotide And Its Derivates	ºËÜÕËá¼°ÆäÑÜÉúÎï	"58-96-8"	497500	500100	512500	484900	362000	785000	0.925363073717752	-0.111908565065	0.919284072257706	0.666666666666667	0.259339688358103
Com_395_pos	Adenosine	ÏÙÜÕ	2.762	C10H13N5O4	267.24	Nucleotide And Its Derivates	ºËÜÕËá¼°ÆäÑÜÉúÎï	"58-61-7"	2810000	3359000	337400	1180000	8270000	4542000	0.465008576329331	-1.10467077025	0.404435920935101	0.777777777777778	0.7190459416112
Com_396_pos	Cytidine	°ûÜÕ	1.029	C9H13N3O5	243.22	Nucleotide And Its Derivates	ºËÜÕËá¼°ÆäÑÜÉúÎï	"65-46-3"	423800	653800	687600	413700	479800	364800	1.40284510847969	0.488355726303	0.1591023170972	0.888888888888889	1.33047866819312
Com_397_pos	SDMA	¶þ¼×»ù-L-¾«°±Ëá	0.913	C8H18N4O2	202.25	Amino Acid And Its Derivatives	°±»ùËá¼°ÆäÑÜÉúÎï	"30344-00-4"	310300	493700	451200	245600	255900	188000	1.82044960116026	0.864294800567	0.0325322599956092	1	1.77353686308171
Com_398_pos	Glutathione	¹Èë×¸ÊëÄ	1.51	C10H17N3O6S	307.32	Amino Acid And Its Derivatives	°±»ùËá¼°ÆäÑÜÉúÎï	"70-18-8"	57640000	74310000	65730000	45910000	47620000	60270000	1.2853055916775	0.36211141248	0.0891446717722594	0.888888888888889	1.37976533646768
Com_399_pos	16alpha-Hydroxytestosterone	16¦Á-ôÇØºçÞÍª	15.01	C19H28O3	304.424	Hormones	¼¤ËØ	"63-01-4"	70050	75320	54780	53020	47700	69630	1.17493395949516	0.232579668291	0.329087415107207	0.888888888888889	0.826126056504359
Com_39_neg	N-Oleoyl Glycine	N-ÓÍõ£¸Ê°±Ëá	14.62	C20H37NO3	339.513	Organic Acid And Its Derivatives	ÓÐ»úËá¼°ÆäÑÜÉúÎï	"2601-90-3"	4844	4227	3459	2693	4901	4656	1.02285714285714	0.0326046654319	0.840129941138796	0.555555555555556	0.45146618868438
Com_3_neg	Indolelactate	3-ßÅßáÈéËá	6.93	C11H11NO3	205.21	Indole And Its Derivatives	ßÅßá¼°ÆäÑÜÉúÎï	"1821-52-9"	32820	16650	16820	19630	21570	12980	1.2235142118863	0.291030859324	0.568556448642621	0.444444444444444	0.715936163502491
Com_400_pos	11beta-Hydroxytestosterone	11¦Â-ôÇØºÍª	0.68	C19H28O3	304.424	Hormones	¼¤ËØ	"1816-85-9"	899700	836400	874300	885600	1099000	1121000	0.840546110252447	-0.250601130622	0.146982274617166	0.888888888888889	1.51365069096299
Com_401_pos	10E,12Z-Octadecadienoic acid	10E,12Z-Ê®°ËÌ¼¶þÏ©Ëá	14.42	C18H32O2	280.445	Fatty Acyls	Ö¬·¾õ£Àà	"2420-56-6"	1999000	2754000	2594000	3317000	2600000	2683000	0.854302325581395	-0.227181385192	0.270115749901997	0.777777777777778	0.950972061677193
Com_402_pos	1,4-Dihydro-1-Methyl-4-Oxo-3-Pyridinecarboxamide	1,4-¶þÇâ-1-¼×»ù-4-Ñõ´ú-3-ßÁà¤¼×õ£°·	1.69	C7H8N2O2	152.151	Pyridine And Its Derivatives	ßÁà¤¼°ÆäÑÜÉúÎï	"769-49-3"	1209000	920800	2112000	1501000	756900	1764000	1.05467565081181	0.07679938859	0.888473280398428	0.444444444444444	0.383106478325917
Com_403_pos	Nandrolone	19-È¥¼×ØºÍª	9.45	C18H26O2	274.398	Hormones	¼¤ËØ	"434-22-0"	503400	686700	445400	703700	515100	549700	0.924795024031665	-0.112794459618	0.622205660297238	0.777777777777778	0.41535658448138
Com_404_pos	1-(4-Methoxyphenyl)-2-propanone	1-(4-¼×Ñõ»ù±½»ù)-2-±ûÍª	1.81	C10H12O2	164.201	Benzene and substituted derivatives	±½¼°ÆäÑÜÉúÎï	"122-84-9"	895400	1090000	1129000	1033000	739900	649700	1.28556096755552	0.362398031412	0.186221053666472	0.888888888888889	1.13399578156781
Com_405_pos	Lysopc 20:4	ÈÜÑªÁ×Ö¬õ£µ¨¼î20:4	12.9	C28H50NO7P	543.681	Phospholipid	Á×Ö¬		1052000	2472000	1595000	1721000	1061000	1698000	1.14263392857143	0.192363274046	0.76023275035351	0.555555555555556	0.468261195543052
Com_406_pos	cAMP	»·ÏÙÜÕËá	1.74	C10H12N5O6P	329.206	Nucleotide And Its Derivates	ºËÜÕËá¼°ÆäÑÜÉúÎï	"60-92-4"	141200	151400	96810	164600	171300	177000	0.759231819068044	-0.397387638553	0.166361209403436	1	1.17724516527049
Com_407_pos	N-Acetyl-aspartic acid	N-ÒÒõ£-Ìì¶¬°±Ëá	1.37	C6H9NO5	175.139	Amino Acid And Its Derivatives	°±»ùËá¼°ÆäÑÜÉúÎï		215200	331800	239400	209400	295900	366500	0.902041752695572	-0.148733882013	0.674692682528543	0.555555555555556	0.38171477562149
Com_408_pos	Benzamidine Hydrochloride Hydrate	±½¼×ëß	4.09	C7H11ClN2O	174.628	Benzene and substituted derivatives	±½¼°ÆäÑÜÉúÎï	"206752-36-5"	643600	443200	701400	825000	408200	425600	1.07800819869785	0.108368150424	0.703460653385866	0.666666666666667	0.450651302464483
Com_409_pos	Mag (18:1)	µ¥õ£¸ÊÓÍõ¥(õ£»ù18:1)	15.23	C21H40O4	356.2	Glycerolipids	¸ÊÓÍÖ¬Àà		26060	27690	30580	19620	18190	18370	1.50106799572802	0.585989329975	0.00464341909900536	1	1.0444046183306
Com_40_neg	Carbamoylphosphate	°±¼×»ùõ£Á×Ëá	0.86	CH2NO5P--	139.004	Organic Acid And Its Derivatives	ÓÐ»úËá¼°ÆäÑÜÉúÎï	"590-55-6"	639200	1097000	1506000	480700	428900	1122000	1.59588501673558	0.674356709354	0.269762008657896	0.777777777777778	1.09681603342825
Com_410_pos	L-beta-Imidazolelactic acid	L-¦Â-ßäßòÈéËá	0.83	C6H8N2O3	156.139	Carbohydrates And Its Derivatives	ÌÇÀà¼°ÆäÑÜÉúÎï	"14403-45-3"	972300	1462000	1148000	1541000	1153000	1140000	0.934350547730829	-0.0979641760113	0.665310947915458	0.666666666666667	0.503685520322711
Com_411_pos	L-Octanoylcarnitine	ÐÁõ£Èâ¼î	7.95	C15H29NO4	287.395	Carnitine	Èâ¼îÀà	"25243-95-2"	712700	415700	233900	666400	851000	406000	0.70827700946241	-0.497614381447	0.368431849460391	0.666666666666667	1.03897508237438
Com_412_pos	Hexanoylcarnitine	¼ºõ£Èâ¼î	6.6	C13H25NO4	259.34	Carnitine	Èâ¼îÀà	"22671-29-0"	3872000	1981000	2160000	2914000	4564000	2191000	0.828730995966491	-0.271024212424	0.564294687123757	0.777777777777778	0.594992048299248
Com_413_pos	D-Ala-D-Ala	D-±û°±õ£-D-±û°±Ëá	0.95	C6H12N2O3	160.171	Amino Acid And Its Derivatives	°±»ùËá¼°ÆäÑÜÉúÎï	"923-16-0"	4658000	7653000	7172000	2763000	4844000	994000	2.26520172073015	1.17963953086	0.157778788329627	0.888888888888889	1.24441750913552
Com_414_pos	D-Galactosamine	2-°±»ù-2-ÍÑÑõ-D-°ëÈéÌÇ	0.71	C6H14ClNO5	215.632	Carbohydrates And Its Derivatives	ÌÇÀà¼°ÆäÑÜÉúÎï	"1772-03-8"	293600	267500	286900	319100	336600	361300	0.833824975417896	-0.262183509294	0.0184465927903489	1	1.57536091513466
Com_415_pos	8-Bromoguanosine	8-äåÄñÜÕ	0.98	C10H12BrN5O5	362.137	Nucleotide And Its Derivates	ºËÜÕËá¼°ÆäÑÜÉúÎï	"4016-63-1"	28560	15070	33330	27110	22680	16540	1.16025930951304	0.214447273233	0.710189265343198	0.666666666666667	0.373161571118817
Com_416_pos	Carnosine	¼¡ëÄ	0.76	C9H14N4O3	226.232	Organic Acid And Its Derivatives	ÓÐ»úËá¼°ÆäÑÜÉúÎï	"305-84-0"	112600000	168800000	127200000	176900000	135700000	118500000	0.947807933194154	-0.0773333584453	0.763115623733421	0.666666666666667	0.340510888487215
Com_417_pos	N-Acetyl-L-glutamic acid	N-ÒÒõ£-L-¹È°±õ£°·	0.71	C7H11NO5	189.166	Amino Acid And Its Derivatives	°±»ùËá¼°ÆäÑÜÉúÎï	"1188-37-0"	9281000	7663000	7567000	7778000	8411000	8618000	0.988067884064982	-0.0173179309726	0.845989236116091	0.666666666666667	0.436512706608628
Com_418_pos	N4-Acetylcytidine	N-ÒÒõ£°ûà×à¤	4.38	C11H15N3O6	285.253	Nucleotide And Its Derivates	ºËÜÕËá¼°ÆäÑÜÉúÎï	"3768-18-1"	8266	11270	11900	12970	16300	15400	0.703738526975599	-0.506888597709	0.0662901304913491	1	1.19383328592653
Com_419_pos	Metanephrine	¼ä¼×ÉöÉÏÏÙËØ	15.12	C10H15NO3	197.231	Phenols And Its Derivatives	·ÓÀà¼°ÆäÑÜÉúÎï	"5001-33-2"	565300	761100	1211000	1199000	703900	955200	0.887792589482523	-0.171705428533	0.621926679224598	0.555555555555556	0.731942302439268
Com_41_neg	Butylmalonic acid	¶¡»ù±û¶þËá	0.7	C7H12O4	160.168	Organic Acid And Its Derivatives	ÓÐ»úËá¼°ÆäÑÜÉúÎï	"534-59-8"	33550000	32720000	30000000	34540000	34440000	33360000	0.940687903068204	-0.0882119430071	0.200928576660079	0.888888888888889	0.94418664947537
Com_420_pos	Ethambutol	ÒÒ°·¶¡´¼	0.81	C10H24N2O2	204.31	Amines	°·Àà	"74-55-5"	25660	29490	34230	53000	77940	41990	0.516856531544556	-0.952164220446	0.054246276541953	1	1.54791373551831
Com_421_pos	Melamine	Èý¾ÛÇè°·	0.9	C3H6N6	126.12	Others	ÆäËü	"108-78-1"	81350	45952	57619	56490	66000	33510	1.18539102564103	0.245363040303	0.530699905616221	0.666666666666667	0.703801959794961
Com_422_pos	Tubercidin	É±½áºË¾úËØ	2.153	C11H14N4O4	266.25	Others	ÆäËü	"69-33-0"	18220	26080	18420	16680	13270	25120	1.13891410931542	0.187658950964	0.537313621984533	0.777777777777778	0.554918585914342
Com_423_pos	1,4-Naphthoquinone	1,4-ÝÁõ«	1.082	C10H6O2	158.153	Others	ÆäËü	"130-15-4"	1628000	1497000	1308000	1483000	1374000	1448000	1.02973286875726	0.0422701248811	0.733131222904325	0.666666666666667	0.24777779537221
Com_424_pos	S-Lactoyglutathione	S-Èéõ£¹Èë×¸ÊëÄ	2.65	C13H21N3O8S	379.386	Amino Acid And Its Derivatives	°±»ùËá¼°ÆäÑÜÉúÎï	"25138-66-3"	37480	16800	6271	177600	326700	101900	0.0998861761794787	-3.32357116078	0.0224689719050968	1	1.68232302410059
Com_425_pos	All-cis-4,7,10,13,16-docosapentaenoic acid	¶þÊ®¶þÌ¼ÎåÏ©Ëá	13.78	C22H34O2	330.504	Fatty Acyls	Ö¬·¾õ£Àà	"25182-74-5"	33970	34030	29300	32430	46580	48570	0.762658723937921	-0.390890473511	0.172221323401348	0.777777777777778	0.617729643167604
Com_426_pos	1,4-Diaminobutane	¸¯°·	0.699	C4H12N2	88.15	Polyamine	¶à°·	"110-60-1"	270300	452000	382500	245500	248700	390900	1.24822054005197	0.319872857221	0.356791133368251	0.777777777777778	0.457959342895213
Com_427_pos	1,3-Dimethyluracil	1,3-¶þ¼×»ùëåà×à¤	4.463	C6H8N2O2	140.14	Organoheterocyclic compounds	ÓÐ»úÔÓ»·»¯ºÏÎï	"874-14-6"	7363	34790	13900	14490	22660	21200	0.96063410454156	-0.0579410666789	0.675720668298021	0.666666666666667	0.516235119990886
Com_428_pos	3-Ureidopropionate	3-õ£ëå±ûËá	1.07	C4H8N2O3	132.12	Organic Acid And Its Derivatives	ÓÐ»úËá¼°ÆäÑÜÉúÎï	"462-88-4"	1335000	1305000	1293000	1468000	1543000	1384000	0.894880546075085	-0.160232979088	0.0621840063349659	1	1.79809331059644
Com_429_pos	5-Methyluridine	5-¼×»ùÄòÜÕ	3.706	C10H14N2O6	258.23	Nucleotide And Its Derivates	ºËÜÕËá¼°ÆäÑÜÉúÎï	"1463-10-1"	43380	40020	23490	68600	39350	49990	0.676775990882614	-0.563249706171	0.18926828046925	0.777777777777778	1.14308406263518
Com_42_neg	ATP	ÈýÁ×ËáÏÙÜÕ	1.04	C10H16N5O13P3	507.181	Nucleotide And Its Derivates	ºËÜÕËá¼°ÆäÑÜÉúÎï	"56-65-5"	61210	51860	12660	21840000	293300	299700	0.00560468951990371	-7.47914982965	0.117003333647976	1	1.23891915385326
Com_430_pos	LysoPC 18:0	ÈÜÑªÁ×Ö¬õ£µ¨¼î 18:0	13.8	C26H54NO7P	523.36	Phospholipid	Á×Ö¬		45960	116500	100500	157900	94710	141000	0.668072457508701	-0.581923512518	0.256973786934535	0.777777777777778	1.20000557970219
Com_431_pos	D-Glucosamine	D-°±»ùÆÏÌÑÌÇ	0.72	C6H13NO5	179.172	Amino Acid And Its Derivatives	°±»ùËá¼°ÆäÑÜÉúÎï	"3416-24-8"	82520	80370	65860	77870	110900	92120	0.814375734273203	-0.296233520415	0.192055974425388	0.777777777777778	1.36837572882838
Com_432_pos	Pseudouridine	¼ÙÄòÜÕ	1.46	C9H12N2O6	244.201	Nucleotide And Its Derivates	ºËÜÕËá¼°ÆäÑÜÉúÎï	"1445-07-4"	39470	28590	23790	49080	26900	24150	0.917307500249676	-0.124522659082	0.841117906605605	0.444444444444444	0.197858647744984
Com_433_pos	O-Acetyl-L-carnitine	ÒÒõ£»ù-L-Èâ¼î	1.45	C9H17lNO4	203.236	Carnitine	Èâ¼îÀà	"3040-38-8"	15680000	12360000	9194000	15440000	20580000	12950000	0.76034306718399	-0.395277584687	0.246548989978063	0.777777777777778	1.24490461267941
Com_434_pos	Thymine	ÐØÏÙà×à¤	7.29	C5H6N2O2	126.113	Nucleotide And Its Derivates	ºËÜÕËá¼°ÆäÑÜÉúÎï	"65-71-4"	28340	20920	99570	1837	9870	3503	9.78500986193294	3.29057330489	0.0291172989395695	1	1.73807355580048
Com_435_pos	XMP	5'-Á×Ëá»ÆÔ­°±Ëá	1.43	C10H11N4O9P--	362.19	Nucleotide And Its Derivates	ºËÜÕËá¼°ÆäÑÜÉúÎï	"523-98-8"	13680	22650	13210	7619	4097	14930	1.85919087292652	0.894674891445	0.182465968600502	0.777777777777778	1.36775088076371
Com_436_pos	Tyramine	ÀÒ°·	1.98	C8H11NO	137.179	Benzene and substituted derivatives	±½¼°ÆäÑÜÉúÎï	"51-67-2"	33770	24810	24750	27110	13990	9433	1.64902143153979	0.721610148912	0.189666473059451	0.777777777777778	1.18941267494791
Com_437_pos	Dimethyl phthalate	ÁÚ±½¶þ¼×Ëá¶þ¼×õ¥	9.12	C10H10O4	194.18	Organic Acid And Its Derivatives	ÓÐ»úËá¼°ÆäÑÜÉúÎï	"131-11-3"	2689000	2669000	2421000	2632000	2762000	2434000	0.993740419008687	-0.00905904905235	0.909423503941847	0.444444444444444	0.415791335546058
Com_438_pos	Dibutyl phthalate	ÁÚ±½¶þ¼×Ëá¶þ¶¡õ¥	13.61	C16H22O4	278.34	Organic Acid And Its Derivatives	ÓÐ»úËá¼°ÆäÑÜÉúÎï	"84-74-2"	5098000	5811000	8988000	6786000	5178000	7998000	0.996743813245166	-0.00470534939585	0.937120720049819	0.555555555555556	0.480148403659625
Com_439_pos	Dl-Threitol	ËÕÌÇ´¼	0.69	C4H10O4	122.12	Sugar Alcohols	ÌÇ´¼	"7493-90-5"	8539000	7349000	7395000	8285000	10240000	10950000	0.789923664122137	-0.340214852627	0.0919035791592781	0.888888888888889	1.65201253411806
Com_43_neg	Anthranilic acid	ÁÚ°±»ù±½¼×Ëá	1.44	C7H7NO2	137.14	Benzoic Acid And Its Derivatives	±½¼×Ëá¼°ÆäÑÜÉúÎï	"118-92-3"	32950	142500	124700	140200	51130	59680	1.19576909286483	0.257938827044	0.862859999806275	0.555555555555556	0.451813618429342
Com_440_pos	Dl-Tropic acid	ÍÐÆ·Ëá	4.09	C9H10O3	166.174	Organic Acid And Its Derivatives	ÓÐ»úËá¼°ÆäÑÜÉúÎï	"28845-94-5"	1691000	1123000	1761000	1934000	1110000	1132000	1.09554597701149	0.131650031489	0.671192667734482	0.555555555555556	0.476187333710335
Com_441_pos	D-Myo-inositol 4-monophosohate	D-ÏËÎ¬´¼-4-Á×Ëá	0.92	C6H13O9P	260.136	Alcohols and polyols	´¼Àà¼°Æä¶àÔª´¼	"46495-39-0"	1267000	789600	452700	882300	12040000	6293000	0.130588645506445	-2.93689863279	0.157312821345773	0.888888888888889	1.5257314708661
Com_442_pos	Pantothenic acid	D-·ºËá	4.57	C9H17NO5	219.235	Vitamins	Î¬ÉúËØ	"79-83-4"	8885000	7948000	7847000	9697000	9066000	5478000	1.01810981395157	0.0258931797819	0.821654944975431	0.666666666666667	0.237739239657825
Com_443_pos	Ergosta-5,7,9(11),22-Tetraen-3-beta-Ol	È¥ÇâÂó½Ç¹Ì´¼	11.13	C28H42O	394.632	Hormones	¼¤ËØ	"516-85-8"	4764000	6587000	7236000	5778000	3787000	8268000	1.04228116413391	0.059744509272	0.787982924131817	0.555555555555556	0.449000735953882
Com_444_pos	Ergosterol	Âó½Ç¹Ì´¼	11.13	C28H44O	396.648	Hormones	¼¤ËØ	"57-87-4"	95440	113000	143900	107800	81750	154800	1.02320313634384	0.0330925915182	0.856130793541095	0.555555555555556	0.346337528846963
Com_445_pos	Ergothioneine	Âó½ÇÁòÒò	1.03	C9H15N3O2S	229.299	Organic Acid And Its Derivatives	ÓÐ»úËá¼°ÆäÑÜÉúÎï	"497-30-3"	110700	67340	74870	70560	67370	63850	1.25339478640103	0.325840897242	0.31018299000279	0.777777777777778	0.869201462764768
Com_446_pos	Dl-3-Hydroxynorvaline	DL-3-ôÇ»ùÕýçÓ°±Ëá	0.85	C5H11NO3	133.146	Amino Acid And Its Derivatives	°±»ùËá¼°ÆäÑÜÉúÎï	"2280-42-4"	5972000	6288000	10120000	5638000	5200000	7191000	1.24133340728826	0.311890658127	0.381674884738896	0.777777777777778	0.843278182959753
Com_447_pos	6-Aminohexanoate	6-°±»ù¼ºËá	2.09	C6H13NO2	131.173	Organic Acid And Its Derivatives	ÓÐ»úËá¼°ÆäÑÜÉúÎï	"60-32-2"	10170000	4043000	14100000	12440000	5155000	6355000	1.18217118997912	0.241438967031	0.811812348422646	0.555555555555556	0.303351818120604
Com_448_pos	3-Hydroxy-DL-kynurenine	3-ôÇ»ù-DL-È®ÄòËØ	9.78	C10H12N2O4	224.213	Ketones	ÍªÀà	"484-78-6"	244200	250000	250500	249000	248700	244400	1.00350357094731	0.005045750511	0.751462077935374	0.666666666666667	0.212841746781791
Com_449_pos	Thioguanine	ÁòÄñàÑßÊ	18.3	C5H5N5S	167.192	Purines and purine derivatives	àÑßÊ¼°ÆäÑÜÉúÎï	"154-42-7"	10300	6546	21440	10680	4276	9928	1.53857900659058	0.621598528488	0.44333061236088	0.666666666666667	0.778902772743272
Com_44_neg	Alloxan	ËÄÑõà×à¤	0.7	C4H4N2O5	160.085	Organoheterocyclic compounds	ÓÐ»úÔÓ»·»¯ºÏÎï	"2244-11-3"	86760000	75150000	71960000	80150000	82670000	79390000	0.965567069898022	-0.0505516202287	0.572318857300313	0.666666666666667	0.581927573712875
Com_450_pos	L-Carnitine	×óÐýÈâ¼î	0.87	C7H15NO3	161.2	Carnitine	Èâ¼îÀà	"541-15-1"	57520000	59750000	44120000	62150000	72510000	54990000	0.850988663327182	-0.232788182096	0.260741632023918	0.777777777777778	0.852869360789144
Com_451_pos	Inosine	¼¡ÜÕ	2.826	C10H12N4O5	268.23	Nucleotide And Its Derivates	ºËÜÕËá¼°ÆäÑÜÉúÎï	"58-63-9"	18380000	28190000	16090000	11530000	17780000	9066000	1.63279132791328	0.707340425057	0.127985280432492	0.888888888888889	0.795202048909516
Com_452_pos	Nicotinic Acid	ÑÌËá	1.478	C6H5NO2	123.11	Vitamins	Î¬ÉúËØ	"59-67-6"	438500	463000	454100	281300	423100	308300	1.33859978275896	0.420724685281	0.128768946237548	1	0.905734778205027
Com_453_pos	Nicotinamide	ÑÌõ£°·	1.539	C6H6N2O	122.12	Vitamins	Î¬ÉúËØ	"98-92-0"	86760000	86930000	86550000	56450000	88770000	63580000	1.24636015325671	0.317721015584	0.219679502769781	0.666666666666667	0.868193975390159
Com_454_pos	Triethyl phosphate	Á×ËáÈýÒÒõ¥	7.89	C6H15O4P	182.155	Organic Acid And Its Derivatives	ÓÐ»úËá¼°ÆäÑÜÉúÎï	"78-40-0"	4645000	4795000	5018000	4898000	4906000	4997000	0.976825890142558	-0.0338266563503	0.399766134703949	0.666666666666667	0.739327783688736
Com_455_pos	Trimethyllysine	Èý¼×»ùÀµ°±Ëá	1.03	C9H21N2O2	189.275	Amino Acid And Its Derivatives	°±»ùËá¼°ÆäÑÜÉúÎï	"66989-56-8"	893400	838700	809100	703400	651800	1386000	0.927039252881949	-0.109297667861	0.95400469644176	0.666666666666667	0.0867643531861949
Com_456_pos	Testosterone	ØºÍª	0.72	C19H28O2	288.424	Hormones	¼¤ËØ	"58-22-0"	1537000	1281000	1520000	1624000	2131000	2041000	0.748447204968944	-0.418027541885	0.0563423805433911	1	1.61796488625336
Com_457_pos	Styrene	±½ÒÒÏ©	10.53	C8H8	104.149	Benzene and substituted derivatives	±½¼°ÆäÑÜÉúÎï	"100-42-5"	176600	242400	308100	294900	291900	238600	0.880906227283741	-0.182939642862	0.467507201156441	0.555555555555556	0.73092142100341
Com_458_pos	1-Methylhistidine	1-¼×»ù×é°±Ëá	0.84	C7H11N3O2	169.18	Amino Acid And Its Derivatives	°±»ùËá¼°ÆäÑÜÉúÎï	"332-80-9"	4674000	6128000	7140000	7624000	10200000	5007000	0.785861328894924	-0.347653334268	0.433426690079194	0.777777777777778	0.786683895532113
Com_459_pos	Furfural	¿·È©	0.87	C5H4O2	96.08	Aldehydes	È©Àà	"98-01-1"	73360	55870	62750	37950	50400	36530	1.53731582319026	0.620413579957	0.0304840824583372	1	1.60723891938895
Com_45_neg	cis-4-Hydroxy-D-proline	Ë³Ê½-4-ôÇ»ù-D-¸¬°±Ëá	2.26	C5H9NO3	131.13	Organic Acid And Its Derivatives	ÓÐ»úËá¼°ÆäÑÜÉúÎï	"2584-71-6"	154900	91580	231300	181700	88570	99820	1.29098327433867	0.368470309565	0.533149804224761	0.666666666666667	0.651418505937099
Com_460_pos	Vidarabine	°¢ÌÇÏÙÜÕ	2.56	C10H13N5O4	267.24	Nucleotide And Its Derivates	ºËÜÕËá¼°ÆäÑÜÉúÎï	"5536-17-4"	3909000	4491000	396900	1587000	11310000	6006000	0.465370576099032	-1.10354809828	0.407099743817116	0.777777777777778	0.727677373958733
Com_461_pos	Isonicotinic acid	ÒìÑÌËá	1.49	C6H5NO2	123.11	Pyridine And Its Derivatives	ßÁà¤¼°ÆäÑÜÉúÎï	"55-22-1"	11180000	10800000	10710000	6833000	10800000	7319000	1.31011542160949	0.38969391928	0.176921386887733	0.833333333333333	0.920609417409936
Com_462_pos	2-Furoylglycine	N-(2-¿·õ£)¸Ê°±Ëá	0.79	C7H7NO4	169.13	Amino Acid And Its Derivatives	°±»ùËá¼°ÆäÑÜÉúÎï	"5657-19-2"	28340000	21760000	27280000	34480000	30890000	34350000	0.775972723626153	-0.365922154048	0.0709871370143804	1	1.76423447682342
Com_463_pos	1-Methylxanthine	1-¼×»ù»ÆàÑßÊ	4.09	C6H6N4O2	166.14	Purines and purine derivatives	àÑßÊ¼°ÆäÑÜÉúÎï	"6136-37-4"	12490	15770	19630	7579	13700	9045	1.57927714021897	0.659264365457	0.102874503909063	0.888888888888889	1.04137088004038
Com_464_pos	Picolinic acid	2-ßÁà¤¼×Ëá	1.48	C6H5NO2	123.11	Organoheterocyclic compounds	ÓÐ»úÔÓ»·»¯ºÏÎï	"98-98-6"	513300	474800	510500	339300	495000	319100	1.29928905843593	0.377722429077	0.173863009692585	0.888888888888889	1.00807723716432
Com_465_pos	Phthalate	ÁÚ±½¶þ¼×Ëá	4.07	C8H6O4	166.13	Benzoic Acid And Its Derivatives	±½¼×Ëá¼°ÆäÑÜÉúÎï	"88-99-3"	1172000	800200	1296000	1379000	740200	800100	1.11951495221457	0.162873796919	0.618952761125128	0.666666666666667	0.561845384002783
Com_466_pos	L-allo-Threonine	L-±ðËÕ°±Ëá	0.87	C4H9NO3	119.12	Amino Acid And Its Derivatives	°±»ùËá¼°ÆäÑÜÉúÎï	"28954-12-3"	6314000	3169000	7807000	8089000	3783000	4328000	1.06728395061728	0.0939440558703	0.88576206103427	0.444444444444444	0.21149444701557
Com_467_pos	L-allo-Isoleucine	L-±ðÒìÁÁ°±Ëá	2.28	C6H13NO2	131.17	Amino Acid And Its Derivatives	°±»ùËá¼°ÆäÑÜÉúÎï	"1509-34-8"	30820000	15230000	41840000	36540000	17180000	19910000	1.19367105799267	0.255405325393	0.711828669424827	0.555555555555556	0.425267675732715
Com_468_pos	Asp-glu	L-Ìì¶¬°±õ£-L-¹È°±Ëá	0.96	C9H14N2O7	262.217	Amino Acid And Its Derivatives	°±»ùËá¼°ÆäÑÜÉúÎï	"6157-06-8"	12770	20100	20800	17120	10390	12240	1.35018867924528	0.433161027714	0.237411843647368	0.888888888888889	1.12616837229795
Com_469_pos	Asp-Phe methyl ester	°¢Ë¹°ÍÌð	5.36	C14H18N2O5	294.303	Organic Acid And Its Derivatives	ÓÐ»úËá¼°ÆäÑÜÉúÎï	"22839-47-0"	132100	128900	128800	97730	92770	126900	1.22810333963453	0.296431962423	0.155778646013232	1	1.34827249189555
Com_46_neg	cholesteryl sulfate	µ¨çÞ´¼ÁòËáÑÎ	0.94	C27H46O4S	466.717	Hormones	¼¤ËØ	"1256-86-6"	1459000	140400	189100	461900	438200	94240	1.79868053181004	0.846938968634	0.807689128443318	0.444444444444444	0.408648116749556
Com_470_pos	Allopurinol	±ðàÑßÊ	2.69	C5H4N4O	136.111	Nucleotide And Its Derivates	ºËÜÕËá¼°ÆäÑÜÉúÎï	"315-30-0"	18190000	26950000	13670000	11200000	16230000	7976000	1.66101790656951	0.732067626328	0.14719158080851	0.888888888888889	0.807032221140547
Com_471_pos	aminoimidazole carboxamide ribonucleotide	°±»ùßäßò¼×õ£°·ºËÌÇºËÜÕËá	16.98	C9H15N4O8P	338.211	Nucleotide And Its Derivates	ºËÜÕËá¼°ÆäÑÜÉúÎï	"68984-62-3"	277800	319200	353200	338800	372100	325900	0.916473765432099	-0.125834511474	0.336355307101257	0.777777777777778	1.01730635500593
Com_472_pos	2'-Hydroxy-5'-methylacetophenone	2'-ôÇ»ù-5'-¼×»ù±½ÒÒÍª	8.74	C9H10O2	150.174	Benzene and substituted derivatives	±½¼°ÆäÑÜÉúÎï	"1450-72-2"	325100	404700	479000	549800	367600	516100	0.843250784792466	-0.245966338963	0.374507574826334	0.777777777777778	0.83242232971498
Com_473_pos	2-Methylsuccinic Acid	¼×»ù¶¡¶þËá	0.94	C5H8O4	132.115	Organic Acid And Its Derivatives	ÓÐ»úËá¼°ÆäÑÜÉúÎï	"498-21-5"	36920000	37010000	33760000	35730000	37240000	34440000	1.00260683362815	0.00375597247431	0.956355174216774	0.444444444444444	0.356725600251834
Com_474_pos	Noradrenaline	È¥¼×ÉöÉÏÏÙËØ	6.36	C8H11NO3	169.178	Hormones	¼¤ËØ	"51-41-2"	29300	24380	17550	22260	16260	26600	1.09382678132678	0.129384290683	0.693746483252071	0.666666666666667	0.455701370008548
Com_475_pos	N-carbamoyl-L-aspartate	N-°±¼×õ£-L-Ìì¶¬°±Ëá	0.9	C5H8N2O5	176.127	Amino Acid And Its Derivatives	°±»ùËá¼°ÆäÑÜÉúÎï	"13184-27-5"	265900	119900	372600	105100	110900	76670	2.59131444972153	1.37368409368	0.112209821503042	1	1.50436223816335
Com_476_pos	Pyridoxine	ßÁ¶ß´¼	1.563	C8H11NO3	169.178	Pyridine And Its Derivatives	ßÁà¤¼°ÆäÑÜÉúÎï	"65-23-6"	30370	56380	111000	38950	43651	44600	1.55462614287624	0.636567682178	0.499674928925408	0.666666666666667	0.643413866306153
Com_477_pos	Dopamine HCl	ÑÎËá¶à°Í°·	1.5	C8H12ClNO2	189.64	Phenols And Its Derivatives	·ÓÀà¼°ÆäÑÜÉúÎï	"62-31-7"	786100	916200	789100	838400	868600	670500	1.04790746582545	0.067511327096	0.629165978413195	0.444444444444444	0.214504279819815
Com_478_pos	Epinephrine bitartrate	¾ÆÊ¯ËáÉöÉÏÏÙËØ	14.86	C13H19NO9	333.29	Hormones	¼¤ËØ	"51-42-3"	71660	110000	109300	202400	129400	139300	0.61761834005519	-0.6952125011	0.0722203816743421	1	1.33084907429075
Com_479_pos	L-Serine	Ë¿°±Ëá	0.846	C3H7NO3	105.093	Amino Acid And Its Derivatives	°±»ùËá¼°ÆäÑÜÉúÎï	"56-45-1"	2186000	2019000	2971000	2053000	1445000	3119000	1.08447937131631	0.117002610702	0.675255867326182	0.555555555555556	0.497677442974892
Com_47_neg	6-Phospho-D-glucono-1,5-lactone	6-Á×Ëá-ÆÏÌÑÌÇ-1,5-ÄÚõ¥	0.97	C6H11O9P	258.12	Sugar Acids And Its Derivatives	ÌÇËá¼°ÆäÑÜÉúÎï	"2641-81-8"	2732000	850600	597800	2055000	2673000	975100	0.733004857007592	-0.448105336968	0.465689250787404	0.666666666666667	0.751530982023541
Com_480_pos	Hypoxanthine	´Î»ÆàÑßÊ	1.509	C5H4N4O	136.11	Nucleotide And Its Derivates	ºËÜÕËá¼°ÆäÑÜÉúÎï	"68-94-0"	89950000	59810000	76900000	69480000	62680000	62980000	1.16152505893205	0.216020279422	0.369039268776953	0.666666666666667	0.627323347422868
Com_481_pos	L-Glutamate	L-¹È°±Ëá	0.886	C5H9NO4	147.129	Amino Acid And Its Derivatives	°±»ùËá¼°ÆäÑÜÉúÎï	"56-86-0"	59580000	91990000	102400000	79860000	58490000	78690000	1.17015296719499	0.226697137149	0.515422711909479	0.777777777777778	0.824099502930869
Com_482_pos	D-2-Aminobutyric acid	D-2-°±»ù¶¡Ëá	0.947	C4H9NO2	103.12	Organic Acid And Its Derivatives	ÓÐ»úËá¼°ÆäÑÜÉúÎï	"2623-91-8"	17750000	22400000	24090000	17360000	15350000	15110000	1.34337097448766	0.425857762806	0.0698085878919055	1	1.66612338776357
Com_483_pos	DL-Norvaline	D-ÕýçÓ°±Ëá	1.068	C5H11NO2	117.15	Amino Acid And Its Derivatives	°±»ùËá¼°ÆäÑÜÉúÎï	"760-78-1"	23400000	11310000	30820000	27800000	11560000	15080000	1.20371050698016	0.267488464886	0.684335736779327	0.555555555555556	0.433594278274731
Com_484_pos	Methionine	µ°°±Ëá	1.46	C5H11NO2S	149.211	Amino Acid And Its Derivatives	°±»ùËá¼°ÆäÑÜÉúÎï	"59-51-8"	4973000	2689000	10730000	6628000	3626000	4563000	1.24127691165553	0.311824996619	0.851854941916756	0.555555555555556	0.284270010730016
Com_485_pos	3-Aminoisobutyric acid	3-°±»ùÒì¶¡Ëá	0.931	C4H9NO2	103.12	Amino Acid And Its Derivatives	°±»ùËá¼°ÆäÑÜÉúÎï	"144-90-1"	69580	82100	61110	59970	43070	77190	1.18065804804971	0.239591179962	0.397590141292656	0.777777777777778	0.922339980555368
Com_486_pos	Anserine	¶ì¼¡ëÄ	0.771	C10H16N4O3	240.26	Organic Acid And Its Derivatives	ÓÐ»úËá¼°ÆäÑÜÉúÎï	"584-85-0"	290300000	234100000	281900000	328200000	296300000	326000000	0.848290373487638	-0.237369904765	0.113965883711635	1	1.61403031533352
Com_487_pos	(S)-2-Aminobutanoate	L-¦Á-°±»ù¶¡Ëá	0.947	C4H9NO2	103.12	Amino Acid And Its Derivatives	°±»ùËá¼°ÆäÑÜÉúÎï	"1492-24-6"	16420000	21160000	22540000	16030000	14660000	14060000	1.34346368715084	0.425957326877	0.081586058358302	1	1.65591336830044
Com_488_pos	LysoPC 20:2	ÈÜÑªÁ×Ö¬õ£µ¨¼î 20:2	13.26	C28H54NO7P	547.36	Phospholipid	Á×Ö¬		258800	514700	237400	269700	107800	213100	1.71164917033525	0.775387028792	0.214949997984334	0.777777777777778	1.15256747220288
Com_489_pos	1-Aminocyclopropane-1-carboxylic acid	1-°±»ù»·±ûÍéôÈËá	0.89	C4H7NO2	101.048	Amino Acid And Its Derivatives	°±»ùËá¼°ÆäÑÜÉúÎï	"22059-21-8"	2207000	2071000	1943000	1584000	1170000	1355000	1.51399367242638	0.598359175748	0.0267334817014456	1	1.96788868413918
Com_48_neg	6-Phospho-D-gluconate	6-Á×ËáÆÏÌÑÌÇËá	0.98	C6H13O10P	276.135	Sugar Acids And Its Derivatives	ÌÇËá¼°ÆäÑÜÉúÎï	"921-62-0"	1006000	1207000	1353000	871800	682000	1441000	1.19073059970616	0.251847043402	0.435732437120578	0.666666666666667	0.860526657801767
Com_490_pos	Levodopa	×óÐý¶à°Í	1.019	C9H11NO4	197.19	Amino Acid And Its Derivatives	°±»ùËá¼°ÆäÑÜÉúÎï	"59-92-7"	12150000	19640000	14270000	19530000	14860000	13280000	0.966226138032306	-0.0495672142768	0.831927497973461	0.555555555555556	0.306438408379481
Com_491_pos	Betaine	Ìð²Ë¼î	0.907	C5H11NO2	117.15	Organic Acid And Its Derivatives	ÓÐ»úËá¼°ÆäÑÜÉúÎï	"107-43-7"	32670000	36020000	48700000	35350000	26410000	50350000	1.04709660155205	0.0663945465201	0.783150615121001	0.555555555555556	0.461249727569826
Com_492_pos	Choline Hydroxide	µ¨¼î	0.828	C5H15NO2	121.18	Cholines	µ¨¼îÀà	"123-41-1"	6467000	5057000	1995000	6692000	3852000	6947000	0.77291178320279	-0.371624334293	0.466744464990343	0.777777777777778	0.718358731585399
Com_493_pos	Trimethylamine N-oxide	Èý¼×°·N-Ñõ»¯Îï	0.872	C3H9NO	75.11	Polyamine	¶à°·	"1184-78-7"	81330	108800	188100	77760	159800	185300	0.89445679421085	-0.160916298785	0.781104280095837	0.444444444444444	0.28299870362787
Com_494_pos	S-Adenosyl-L-methionine	S-ÏÙÜÕµ°°±Ëá	0.8	C15H22N6O5S	398.44	Amino Acid And Its Derivatives	°±»ùËá¼°ÆäÑÜÉúÎï	"29908-03-0"	107600	82930	104900	89210	125200	102300	0.932809194531275	-0.100346085895	0.63352451089365	0.444444444444444	0.340322780443839
Com_495_pos	Pipecolic acid	ßßà¤¼×Ëá	1.042	C6H11NO2	129.16	Organic Acid And Its Derivatives	ÓÐ»úËá¼°ÆäÑÜÉúÎï	"535-75-1"	21020000	33970000	33510000	24830000	19250000	23790000	1.30396345955503	0.382903442071	0.256088389661603	0.777777777777778	1.24131626207426
Com_496_pos	Azelaic acid	ÈÉ¶þËá	7.433	C9H16O4	188.22	Fatty Acyls	Ö¬·¾õ£Àà	"123-99-9"	82180	67100	63610	77360	80340	80450	0.893932395549024	-0.161762364479	0.267495325004746	0.666666666666667	1.03359736002289
Com_497_pos	gamma-Glutamylglutamic acid	¦Ã-¹È°±õ£¹È°±Ëá	1.05	C10H16N2O7	276.243	Amino Acid And Its Derivatives	°±»ùËá¼°ÆäÑÜÉúÎï	"1116-22-9"	38420	118300	81990	31450	45680	83050	1.49026095642402	0.575564980066	0.433656480978515	0.666666666666667	0.878939121621931
Com_498_pos	beta-Nicotinamide adenine dinucleotide phosphate	ÑÌõ£°·ÏÙàÑßÊ¶þºËÜÕËáÁ×Ëá	1.03	C21H29N7O17P3	744.41	Nucleotide And Its Derivates	ºËÜÕËá¼°ÆäÑÜÉúÎï	"53-59-8"	84190	85890	86100	338500	73810	181600	0.431344816554697	-1.21308647559	0.272932004767324	0.666666666666667	1.17703318139226
Com_499_pos	L-Pipecolate	L-ßßà¤Ëá	1.049	C6H11NO2	129.16	Amino Acid And Its Derivatives	°±»ùËá¼°ÆäÑÜÉúÎï	"3105-95-1"	975000	1568000	1551000	1262000	951700	1186000	1.20422390210901	0.268103658236	0.409389874823383	0.777777777777778	0.982877593996436
Com_49_neg	Acetyl phosphate	ÒÒõ£Á×Ëá	0.9	C2H5O5P	140.032	Organic Acid And Its Derivatives	ÓÐ»úËá¼°ÆäÑÜÉúÎï	"590-54-5"	3932000	1836000	1774000	2568000	3466000	1289000	1.02990577632118	0.0425123546394	0.92994836140984	0.444444444444444	0.334311193939187
Com_4_neg	Decanoic acid	Õý¹ïËá	2.16	C10H20O2	172.265	Fatty Acyls	Ö¬·¾õ£Àà	"334-48-5"	3117000	953100	1785000	2251000	2843000	2092000	0.814792652379627	-0.29549512443	0.465481591595112	0.666666666666667	0.524935412309544
Com_500_pos	gamma-Nonanolactone	¦Ã-ÈÉÄÚõ¥	4.1	C9H16O2	156.222	Esters	õ¥Àà	"104-61-0"	271600	184000	312900	304000	159800	189600	1.17615549433731	0.23407880514	0.519608860056239	0.666666666666667	0.730507305157054
Com_501_pos	UDP-N-acetylglucosamine	Äòà×à¤¶þÁ×Ëá-N-ÒÒõ£ÆÏÌÇ°·	0.99	C17H27N3O17P2	607.354	Nucleotide And Its Derivates	ºËÜÕËá¼°ÆäÑÜÉúÎï	"528-04-1"	64990	26030	37380	86240	41500	77430	0.625822488667934	-0.676174592737	0.234101767194188	0.888888888888889	1.04744449223843
Com_502_pos	Choline Chloride	ÂÈ»¯µ¨¼î	0.83	C5H14ClNO	139.62	Cholines	µ¨¼îÀà	"67-48-1"	3305000	2546000	1050000	3557000	2213000	3577000	0.738311757783246	-0.437697960939	0.390690674287893	0.777777777777778	0.847372474544639
Com_503_pos	1-Methylguanine	1-¼×»ùÄñàÑßÊ	4.03	C6H7N5O	165.153	Nucleotide And Its Derivates	ºËÜÕËá¼°ÆäÑÜÉúÎï	"938-85-2"	70960	54890	76970	85030	65330	61720	0.956337231233497	-0.0644086523743	0.768275631671653	0.444444444444444	0.365664300106384
Com_504_pos	Serotonin	5-ôÇ»ùÉ«°·	2.94	C10H12N2O	176.215	Indole And Its Derivatives	ßÅßá¼°ÆäÑÜÉúÎï	"50-67-9"	55330	25730	73210	32050	51200	46910	1.18523355869699	0.24517138045	0.789378569630004	0.666666666666667	0.230340842930026
Com_505_pos	1-Palmitoyl-Sn-Glycero-3-Phosphocholine	1-Ê®Áùõ£-SN-±ûÈý´¼-Á×Ëáµ¨¼î	12.52	C24H50NO7P	495.63	Phospholipid	Á×Ö¬	"17364-16-8"	524800	1193000	978500	1005000	478400	1076000	1.05348909900758	0.0751753859264	0.882746488288609	0.444444444444444	0.411264672357331
Com_506_pos	1-Stearoyl-Sn-Glycerol-3-Phosphocholine	1-Ó²Ö¬õ£-SN-¸ÊÓÍ-3-Á×õ£µ¨¼î	13.78	C26H54NO7P	523.683	Phospholipid	Á×Ö¬	"19420-57-6"	22980	90380	65540	92600	58510	88170	0.747659645603477	-0.41954642818	0.422998785717069	0.666666666666667	0.947594629867086
Com_507_pos	2-(3,4-dimethoxyphenyl)ethanamine	2-(3,4-¶þ¼×Ñõ»ù±½»ù)ÒÒ°·	1.81	C10H15NO2	181.232	Benzene and substituted derivatives	±½¼°ÆäÑÜÉúÎï	"120-20-7"	10280000	10580000	11550000	12000000	5397000	6208000	1.37301419190849	0.457346537714	0.261830156813216	0.666666666666667	1.16813700860299
Com_508_pos	2-(Dimethylamino)Guanosine	¶þ¼×»ùÄñÜÕ	4.57	C12H17N5O5	311.294	Nucleotide And Its Derivates	ºËÜÕËá¼°ÆäÑÜÉúÎï	"2140-67-2"	256600	220600	273200	315500	207500	209300	1.02471664618326	0.0352250320131	0.809156706895627	0.666666666666667	0.348094035408634
Com_509_pos	1-Methylguanosine	1-¼×»ùÄñÜÕ	4.04	C11H15N5O5	297.267	Nucleotide And Its Derivates	ºËÜÕËá¼°ÆäÑÜÉúÎï	"2140-65-0"	269400	252200	329700	406600	239200	251100	0.949158211617795	-0.0752795101782	0.888161564518484	0.666666666666667	0.352806857343163
Com_50_neg	ADP-ribose	ADPºËÌÇ	1.05	C15H23N5O14P2	591.315	Nucleotide And Its Derivates	ºËÜÕËá¼°ÆäÑÜÉúÎï	"20762-30-5"	43800000	33850000	49260000	38600000	55980000	32470000	0.998898071625344	-0.00159062313896	0.949052819238814	0.555555555555556	0.161096679281948
Com_510_pos	1-Methylnicotinamide	1-¼×»ùÑÌõ£°·	2.68	C7H9N2O+	137.159	Pyridine And Its Derivatives	ßÁà¤¼°ÆäÑÜÉúÎï	"3106-60-3"	5546000	9417000	4729000	3706000	5816000	2637000	1.61954108068098	0.695585063467	0.189449854544934	0.777777777777778	0.788010152159543
Com_511_pos	1-Methyluric acid	1-¼×»ùÄòËá	7.86	C6H6N4O3	182.137	Organic Acid And Its Derivatives	ÓÐ»úËá¼°ÆäÑÜÉúÎï	"708-79-2"	1618000	1639000	1527000	1694000	1643000	1611000	0.966855295068715	-0.0486281107783	0.274014745562109	0.777777777777778	1.08796624117032
Com_512_pos	1-Oleoyl-Sn-Glycero-3-Phosphocholine	ÓÍõ£Á×Ëáµ¨¼î	12.82	C26H52NO7P	521.667	Phospholipid	Á×Ö¬	"19420-56-5"	4790000	10490000	6660000	7494000	4451000	7469000	1.13011229009993	0.176466128677	0.749103174758533	0.444444444444444	0.448410532308572
Com_513_pos	L-Hydroxylysine	5-ôÇ»ù-L-Àµ°±Ëá	0.9	C6H14N2O3	163.195	Amino Acid And Its Derivatives	°±»ùËá¼°ÆäÑÜÉúÎï	"1190-94-9"	53310	34700	28870	36900	57520	41760	0.858275811426054	-0.220486755048	0.497906573628679	0.777777777777778	0.825023530867148
Com_514_pos	DL-Leucine	DL-ÁÁ°±Ëá	2.3	C6H13NO2	131.173	Amino Acid And Its Derivatives	°±»ùËá¼°ÆäÑÜÉúÎï	"328-39-2"	2410000	1125000	3254000	2772000	1290000	1504000	1.2197269134028	0.286558176656	0.697999402511659	0.555555555555556	0.430188648674897
Com_515_pos	Dl-Indole-3-lactic acid	DL-ßÅßá-3-ÈéËá	4.87	C11H11NO3	205.21	Organic Acid And Its Derivatives	ÓÐ»úËá¼°ÆäÑÜÉúÎï	"832-97-3"	23620000	17070000	21390000	19370000	12000000	13080000	1.39662542182227	0.48194513847	0.130841623502549	0.888888888888889	1.36692587158125
Com_516_pos	Dl-Norleucine	DL-ÕýÁÁ°±Ëá	0.9	C6H13NO2	131.173	Amino Acid And Its Derivatives	°±»ùËá¼°ÆäÑÜÉúÎï	"616-06-8"	32220000	32010000	38760000	33900000	23380000	45360000	1.0034099766173	0.00491118758873	0.874454659121819	0.555555555555556	0.333256599020064
Com_517_pos	N-acetyl-glutamate	N-ÒÒõ£-¹È°±Ëá	1.67	C7H11NO5	189.166	Amino Acid And Its Derivatives	°±»ùËá¼°ÆäÑÜÉúÎï		894800	308800	417900	202800	470900	233700	1.78697377121446	0.837518458992	0.25470584567006	0.777777777777778	1.14777161727725
Com_518_pos	N-Acetylglycine	N-ÒÒõ£»ù¸Ê°±Ëá	0.9	C4H7NO3	117.103	Amino Acid And Its Derivatives	°±»ùËá¼°ÆäÑÜÉúÎï	"543-24-8"	30280000	38050000	45290000	31840000	22320000	48470000	1.10708369872357	0.146764298153	0.621726064015278	0.555555555555556	0.644546180489076
Com_519_pos	N-Acetylhistamine	ÒÒõ£»ù×é°·	2.73	C7H11N3O	153.182	Amino Acid And Its Derivatives	°±»ùËá¼°ÆäÑÜÉúÎï	"673-49-4"	168400	256100	117100	96390	145900	64520	1.76526188846517	0.81988223288	0.154673600316621	0.888888888888889	0.860556294829443
Com_51_neg	Ala-trp	L-±û°±õ£-L-É«°±Ëá	5.46	C14H17N3O3	275.303	Amino Acid And Its Derivatives	°±»ùËá¼°ÆäÑÜÉúÎï	"16305-75-2"	169100	217400	248200	163300	211400	69610	1.42850712340483	0.514508230447	0.315691418745716	0.888888888888889	0.852803458061289
Com_520_pos	N-Acetylthreonine	N-ÒÒõ£»ùËÕ°±Ëá	1.74	C6H11NO4	161.156	Amino Acid And Its Derivatives	°±»ùËá¼°ÆäÑÜÉúÎï	"17093-74-2"	133800	144000	86920	149800	141600	170400	0.789779125162408	-0.340478858797	0.239999282270108	0.888888888888889	1.23935978102331
Com_521_pos	Feruloyl Putrescine	°¢Îºõ£¸¯°·	15.1	C14H20N2O3	264.32	Phenolamides	·Ó°·	"501-13-3"	840200	1164000	1092000	1445000	1177000	1307000	0.788037668617969	-0.34366350197	0.118663525099587	1	1.15937610883919
Com_522_pos	L-Lysinamide	Àµ°±õ£°·	4.91	C6H15N3O	145.2	Amino Acid And Its Derivatives	°±»ùËá¼°ÆäÑÜÉúÎï	"32388-19-5"	1365000	1001000	1279000	1176000	742700	847300	1.3177874186551	0.398117658064	0.168582410002851	0.888888888888889	1.17294458711888
Com_523_pos	Phosphoethanolamine	Á×ËáÒÒ´¼°·	0.86	C2H8NO4P	141.063	Organic Acid And Its Derivatives	ÓÐ»úËá¼°ÆäÑÜÉúÎï	"1071-23-4"	639100	737400	968600	687300	497600	1260000	0.959180334574011	-0.0601260144332	0.953043081106169	0.555555555555556	0.320030025799419
Com_524_pos	Calcium phosphorylcholine chloride	ÂÈ»¯Á×õ£µ¨¼î¸ÆÑÎ	0.87	C5H13NO4P.Ca.Cl	257.666	Cholines	µ¨¼îÀà	"4826-71-5"	11970000	12630000	16390000	15620000	8002000	26840000	0.812294399746344	-0.299925396938	0.803953632509624	0.555555555555556	0.456856280671604
Com_525_pos	Pyridoxine O-Glucoside	ßÁ¶ß´¼ÆÏÌÑÌÇÜÕ	0.99	C14H21NO8	331.127	Pyridine And Its Derivatives	ßÁà¤¼°ÆäÑÜÉúÎï		500300	251700	407200	361000	225100	473700	1.09379128137384	0.129337467514	0.764364216262264	0.666666666666667	0.267589525036822
Com_526_pos	Cyprodinil	à×¾ú»·°·	9.02	C14H15N3	225.289	Benzene and substituted derivatives	±½¼°ÆäÑÜÉúÎï	"121552-61-2"	254000	264900	310100	273500	276200	289700	0.987610197760305	-0.0179863615028	0.82204465478999	0.666666666666667	0.460607046998414
Com_527_pos	N-Methyl-a-aminoisobutyric acid	N-¼×»ù-¦Á-°±»ùÒì¶¡Ëá	1.22	C5H11NO2	117.146	Organic Acid And Its Derivatives	ÓÐ»úËá¼°ÆäÑÜÉúÎï	"2566-34-9"	19720000	9992000	26090000	23880000	10120000	13000000	1.18727659574468	0.247656073837	0.690044042804049	0.555555555555556	0.429447230406242
Com_528_pos	Niflumic Acid	·úÄáËá	15.12	C13H9F3N2O2	282.218	Others	ÆäËü	"4394-00-7"	2980000	4109000	4082000	5763000	4319000	4527000	0.764665617085358	-0.387099089612	0.124362431666669	1	1.23891272414243
Com_529_pos	N¦Å-(1-Carboxymethyl)-L-lysine	N¦Å-(1-ôÈ¼×»ù)-L-Àµ°±Ëá	0.84	C8H16N2O4	204.224	Amino Acid And Its Derivatives	°±»ùËá¼°ÆäÑÜÉúÎï	"5746-04-3"	109700	257100	227100	190300	157800	123600	1.25906296374814	0.332350431759	0.58164474952075	0.666666666666667	0.445218749805778
Com_52_neg	N-Acetylglucosamine 1-phosphate	N-ÒÒõ£ÆÏÌÑÌÇ°· 1-Á×Ëá	0.91	C8H16NO9P	301.1	Carbohydrates And Its Derivatives	ÌÇÀà¼°ÆäÑÜÉúÎï		306900	454100	477900	212100	225200	373000	1.52893989880291	0.612531696821	0.129295022133592	0.888888888888889	1.31366014068491
Com_530_pos	Oxymetazoline	ôÇ¼×ßòßø	5.06	C16H24N2O	260.375	Benzene and substituted derivatives	±½¼°ÆäÑÜÉúÎï	"1491-59-4"	583100	554800	591100	597500	534300	592400	1.00278389977961	0.00401073824642	0.933537428789071	0.666666666666667	0.188903704109703
Com_531_pos	N¦Å,N¦Å,N¦Å-trimethyllysine	N¦Å,N¦Å,N¦Å-Èý¼×»ùÀµ°±Ëá	0.76	C9H20N2O2	188.267	Amino Acid And Its Derivatives	°±»ùËá¼°ÆäÑÜÉúÎï	"19253-88-4"	14800000	11730000	11550000	12730000	13600000	13180000	0.963806631232599	-0.0531843676697	0.648593586987198	0.666666666666667	0.582125583455635
Com_532_pos	19-Norethisterone	È²ÅµÍª	15.11	C20H26O2	298.419	Others	ÆäËü	"68-22-4"	33930	56880	46910	58220	33150	66240	0.87380242370408	-0.194620987433	0.684039613828947	0.666666666666667	0.580292626842653
Com_533_pos	N-Methyl-L-arginine hydrochloride	N'-µ¥¼×»ù-L-¾«°±ËáÑÎËáÑÎ	0.95	C7H16N4O2	188.23	Amino Acid And Its Derivatives	°±»ùËá¼°ÆäÑÜÉúÎï	"156706-47-7"	139700	160700	120200	115400	53090	90390	1.62469097651422	0.700165337189	0.135987139772034	1	1.49881983334192
Com_534_pos	N-Tetradecanamide	N-ÕýÊ®ËÄÍé»ùï§	13.59	C14H29NO	227.386	Fatty Acyls	Ö¬·¾õ£Àà	"638-58-4"	586800	633200	670400	768300	693100	718600	0.867155963302752	-0.205636600578	0.0462481990416595	1	1.3384377767145
Com_535_pos	5,6-Dihydro-5-methyluracil	5,6-¶þÇâÐØÏÙà×à¤	0.69	C5H8N2O2	128.13	Pyrimidines and pyrimidine derivatives	à×à¤¼°ÆäÑÜÉúÎï	"696-04-8"	994400	774100	934900	592300	1052000	1213000	0.946137962412067	-0.0798775274162	0.949077672803506	0.666666666666667	0.161302151806825
Com_536_pos	N-Methylnicotinamine	N-¼×»ùÑÌõ£°·	1.82	C7H8N2O	136.15	Pyridine And Its Derivatives	ßÁà¤¼°ÆäÑÜÉúÎï	"114-33-0"	18020	28520	27050	13010	15990	11660	1.80988686669946	0.855899519434	0.0356194533848797	1	1.68939531017801
Com_537_pos	Trigonelline	ºùÂ«°Í¼î	0.94	C7H7NO2	137.14	Alkaloids and derivatives	ÉúÎï¼î¼°ÆäÑÜÉúÎï	"535-83-1"	775300	822600	797500	654400	627800	673400	1.22489261607691	0.292655276539	0.00177731172533337	1	0.871188060931116
Com_538_pos	2-Piperidinone	2-ßßà¤Íª	4.15	C5H9NO	99.132	Organoheterocyclic compounds	ÓÐ»úÔÓ»·»¯ºÏÎï	"675-20-7"	78260	319600	136200	112300	213700	192800	1.02941403238242	0.0418233537835	0.837487816929101	0.555555555555556	0.244996119617828
Com_539_pos	Phloretate	¶ÔôÇ»ù±½±ûËá	4.05	C9H10O3	166.177	Fatty Acyls	Ö¬·¾õ£Àà	"501-97-3"	9058000	6078000	9988000	10720000	5724000	5980000	1.12040670709954	0.164022524968	0.624303667952168	0.666666666666667	0.557361067608303
Com_53_neg	2-C-Methyl-D-erythritol 2,4-cyclodiphosphate	2-C-¼×»ù-D-³àÞºÌÇ´¼-2,4-»·¶þÁ×Ëáõ¥	0.89	C5H12O9P2	278.09	Organic oxygen compounds	ÓÐ»úÑõ»¯ºÏÎï	"143488-44-2"	1083000	761300	1087000	981800	636600	919200	1.15514659520807	0.208075950134	0.455424088763797	0.777777777777778	0.684264305222052
Com_540_pos	Alpha-Linolenic acid	¦Á-ÑÇÂéËá	12.64	C18H30O2	278.435	Eicosanoid	Ñõ»¯Ö¬ÖÊ	"463-40-1"	153400	180500	165400	85560	80670	134400	1.66084555766224	0.731917923057	0.0707990471072904	1	1.30912393438623
Com_541_pos	3-Methylindole	3-¼×»ùßÅßá	4.87	C9H9N	131.177	Indole And Its Derivatives	ßÅßá¼°ÆäÑÜÉúÎï	"83-34-1"	209500	171200	204400	183600	119900	143800	1.30807064609882	0.387440459815	0.137455914964592	0.888888888888889	1.30928225003769
Com_542_pos	isoleucine	ÒìÁÁ°±Ëá	2.11	C6H13NO2	131.17	Amino Acid And Its Derivatives	°±»ùËá¼°ÆäÑÜÉúÎï	"73-32-5"	124600000	62340000	172500000	150000000	71240000	82620000	1.18291318370302	0.242344195371	0.731974275292756	0.555555555555556	0.403494699100035
Com_543_pos	Creatinine	¼¡Ëáôû	0.898	C4H7N3O	113.12	Organic Acid And Its Derivatives	ÓÐ»úËá¼°ÆäÑÜÉúÎï	"60-27-5"	2290000	2256000	2206000	2372000	2431000	2400000	0.93738719977787	-0.0932830002444	0.0110527542233687	1	1.28513411196568
Com_544_pos	L-Citrulline	L-¹Ï°±Ëá	0.89	C6H13N3O3	175.19	Amino Acid And Its Derivatives	°±»ùËá¼°ÆäÑÜÉúÎï	"372-75-8"	300900	469600	339800	335600	296100	226100	1.294357659128	0.372236320386	0.226390535065851	0.888888888888889	1.2200080022273
Com_545_pos	L-Leucine	L-ÁÁ°±Ëá	2.32	C6H13NO2	131.17	Amino Acid And Its Derivatives	°±»ùËá¼°ÆäÑÜÉúÎï	"61-90-5"	68240000	34450000	96350000	82910000	38920000	44940000	1.19350002998141	0.255198602661	0.717510403940649	0.555555555555556	0.419922017241998
Com_546_pos	Urocanic acid	Äò¿¯Ëá	1.04	C6H6N2O2	138.12	Organic Acid And Its Derivatives	ÓÐ»úËá¼°ÆäÑÜÉúÎï	"104-98-3"	102500	161600	184000	99630	99060	89480	1.55498490474373	0.636900575239	0.140674712776742	1	1.35518330433673
Com_547_pos	D-Glutamine	D-¹È°±õ£°·	0.86	C5H10N2O3	146.14	Amino Acid And Its Derivatives	°±»ùËá¼°ÆäÑÜÉúÎï	"5959-95-5"	75750000	109300000	104800000	79620000	64030000	78890000	1.30246247865552	0.381241811938	0.146935603499825	0.777777777777778	1.33239664369205
Com_548_pos	L-Ornithine	Äñ°±Ëá	0.762	C5H12N2O2	132.16	Amino Acid And Its Derivatives	°±»ùËá¼°ÆäÑÜÉúÎï	"70-26-8"	612000	376200	652300	559400	495500	514300	1.04543716543462	0.0641063533287	0.930320152705153	0.666666666666667	0.0873314254976134
Com_549_pos	LysoPE 18:2	ÈÜÑªÁ×Ö¬õ£ÒÒ´¼°· 18:2	12.08	C23H44NO7P	477.6	Phospholipid	Á×Ö¬		29340	33590	25340	20650	14230	23840	1.50323569482289	0.588071229543	0.0917695270655816	1	1.26742518164086
Com_54_neg	Allolithocholic acid	±ðÊ¯µ¨Ëá	11.18	C24H40O3	376.579	Bile Acids	µ¨Ö­Ëá	"2276-93-9"	1957000	2946000	2992000	2303000	1557000	3481000	1.07546655768969	0.104962663947	0.714965182285106	0.555555555555556	0.483411505689785
Com_550_pos	LysoPC 10:0	ÈÜÑªÁ×Ö¬õ£µ¨¼î (1-õ£»ù10:0)	6.25	C18H38NO7P	411.3	Phospholipid	Á×Ö¬		10460	7506	5512	7766	7192	8476	1.00187761372365	0.00270628412403	0.888368243984377	0.555555555555556	0.14252921883646
Com_551_pos	2-Hydroxy-6-Aminopurine	2-ôÇ»ù-6-°±»ùàÑßÊ	2.76	C5H5N5O	151.126	Nucleotide And Its Derivates	ºËÜÕËá¼°ÆäÑÜÉúÎï	"3373-53-3"	411900	520200	635000	758400	196700	416900	1.14220116618076	0.191816762691	0.579703374851406	0.555555555555556	0.483895307010104
Com_552_pos	N-Acetyl-Dl-glutamic acid	N-ÒÒõ£-DL-¹È°±Ëá	1.84	C7H11NO5	189.166	Amino Acid And Its Derivatives	°±»ùËá¼°ÆäÑÜÉúÎï	"5817-08-3"	1590000	556400	821300	444300	795400	382500	1.82942917026261	0.871393560149	0.219812386176611	0.888888888888889	1.19645328055245
Com_553_pos	N6-Succinyl Adenosine	N6-çúçêõ£ÏÙÜÕ	4.54	C14H17N5O8	383.313	Nucleotide And Its Derivates	ºËÜÕËá¼°ÆäÑÜÉúÎï	"4542-23-8"	242000	135100	173700	85680	206100	204500	1.10985733859918	0.150374244032	0.682540170492044	0.444444444444444	0.496994304600112
Com_554_pos	N-Acetyl-L-histidine	N-ÒÒõ£-L-×é°±Ëá	1.0	C8H11N3O3	197.191	Amino Acid And Its Derivatives	°±»ùËá¼°ÆäÑÜÉúÎï	"2497-02-1"	35830000	55750000	42700000	54770000	44800000	38830000	0.970231213872832	-0.0435995008265	0.832371543523879	0.555555555555556	0.296231436895103
Com_555_pos	2-Phenylglycine	DL-±½¸Ê°±Ëá	2.78	C8H9NO2	151.163	Amino Acid And Its Derivatives	°±»ùËá¼°ÆäÑÜÉúÎï	"2835-06-5"	391800	522900	647400	690300	176200	373300	1.25996128407808	0.333379403466	0.468457588442743	0.666666666666667	0.591442371481933
Com_556_pos	O-Acetyl-L-homoserine	O-ÒÒõ£»ù-L-¸ßË¿°±Ëá	1.0	C6H11NO4	161.16	Amino Acid And Its Derivatives	°±»ùËá¼°ÆäÑÜÉúÎï		17330000	19090000	12870000	19520000	21020000	17670000	0.846761724789555	-0.239972036577	0.27169900414748	0.888888888888889	0.874052009216685
Com_557_pos	NG,NG-Dimethyl-L-arginine	N,N-¶þ¼×»ù¾«°±Ëá	0.93	C8H20Cl2N4O2	202.254	Amino Acid And Its Derivatives	°±»ùËá¼°ÆäÑÜÉúÎï	"220805-22-1"	164200	299100	179600	98860	166000	114200	1.69603756661215	0.762168125423	0.102576654599341	0.888888888888889	1.39517768873559
Com_558_pos	Cytarabine	°¢ÌÇ°ûÜÕ	1.0	C9H13N3O5	243.22	Nucleotide And Its Derivates	ºËÜÕËá¼°ÆäÑÜÉúÎï	"147-94-4"	650400	1231000	1002000	518800	383300	668800	1.83550830733974	0.876179643956	0.0742198011693728	0.888888888888889	1.43550426975528
Com_559_pos	Cuminaldehyde	¿ÝÜøÈ©	4.06	C10H12O	148.2	Prenol lipids	Ï©´¼õ¥	"122-03-2"	198000	140400	211900	249300	167200	169200	0.939559501451255	-0.0899435657802	0.759275097512146	0.444444444444444	0.397930842385649
Com_55_neg	Isolithocholic acid	ÒìÊ¯µ¨Ëá	13.06	C24H40O3	376.579	Bile Acids	µ¨Ö­Ëá	"1534-35-6"	11430	8816	7464	13530	11580	9143	0.808980235307856	-0.305823639169	0.271675716400289	0.888888888888889	0.499099125061216
Com_560_pos	Cytidine-5-Triphosphate	°ûÜÕ-5-ÈýÁ×Ëá	1.79	C9H16N3O14P3	483.16	Nucleotide And Its Derivates	ºËÜÕËá¼°ÆäÑÜÉúÎï	"36051-68-0"	9594	5769	3199	2768	4407	2350	1.94876640419947	0.962561167199	0.191471787041455	0.888888888888889	1.03778754851759
Com_561_pos	2-Deoxy-D-galactose	2-ÍÑÑõ-D-°ëÈéÌÇ	0.69	C6H12O5	164.156	Carbohydrates And Its Derivatives	ÌÇÀà¼°ÆäÑÜÉúÎï	"1949-89-9"	3682000	3067000	2836000	2450000	2844000	2910000	1.1683325207216	0.224450940076	0.189846250734135	0.777777777777778	1.10263903518984
Com_562_pos	dAMP	2'-ÍÑÑõÏÙÜÕ-5'-µ¥Á×Ëá	1.47	C10H14N5O6P	331.222	Nucleotide And Its Derivates	ºËÜÕËá¼°ÆäÑÜÉúÎï	"653-63-4"	2838000	2491000	2856000	3917000	3202000	4333000	0.714722319245547	-0.484545253638	0.0463387659306474	1	1.67756221077563
Com_563_pos	2-Methylbutyroylcarnitine	2-¼×»ù¶¡õ£Èâ¶¾¼î	5.45	C12H23NO4	245.315	Fatty Acyls	Ö¬·¾õ£Àà	"31023-25-3"	3364000	2540000	1681000	1489000	3060000	1823000	1.19036409290647	0.251402913609	0.568721858006156	0.666666666666667	0.75248123823068
Com_564_pos	2'-Deoxyguanosine-5'-monophosphate	2-ÍÑÑõÄñÜÕ-5-µ¥Á×Ëá	1.66	C10H14N5O7P	347.221	Nucleotide And Its Derivates	ºËÜÕËá¼°ÆäÑÜÉúÎï	"312693-67-7"	15290	10700	13690	8258	9656	10950	1.37472283813747	0.459140782019	0.0822784416721086	0.888888888888889	0.681412381105666
Com_565_pos	L-2-Aminoadipic acid	°±»ù¼º¶þËá	0.91	C6H11NO4	161.156	Organic Acid And Its Derivatives	ÓÐ»úËá¼°ÆäÑÜÉúÎï	"542-32-5"	531500	247600	658400	1015000	202500	569800	0.804285794214737	-0.314219856379	0.86723790112888	0.555555555555556	0.376026684505989
Com_566_pos	22(S)-Hydroxycholesterol	22(S)-ôÇ»ùµ¨¹Ì´¼	0.98	C27H46O2	402.653	Bile Acids	µ¨Ö­Ëá	"22348-64-7"	15600	9800	12040	19610	22620	15170	0.652264808362369	-0.61647030198	0.0736092319281291	0.888888888888889	0.932618106337861
Com_567_pos	2-Aminooctanoic acid	2-°±»ùÐÁËá	1.03	C8H17NO2	159.226	Organic Acid And Its Derivatives	ÓÐ»úËá¼°ÆäÑÜÉúÎï	"2187-07-7"	477700	397300	332200	434600	281900	450300	1.03462461432979	0.0491074196285	0.82161930592931	0.444444444444444	0.217921485091156
Com_568_pos	Hypotaurine	2-°±»ùÒÒÍéÑÇ»ÇËá	0.94	C2H7NO2S	109.147	Organic Acid And Its Derivatives	ÓÐ»úËá¼°ÆäÑÜÉúÎï	"300-84-5"	48570	58100	37320	123900	52370	72200	0.57950658027126	-0.787103051825	0.176754511534682	0.888888888888889	1.27753954033436
Com_569_pos	2,6-Dimethylaniline	2,6-¶þ¼×»ù±½°·	4.07	C8H11N	121.18	Benzene and substituted derivatives	±½¼°ÆäÑÜÉúÎï	"87-62-7"	44830	20970	62960	57350	31870	43260	0.971920289855073	-0.0410900960216	0.809287814979834	0.555555555555556	0.336851950700366
Com_56_neg	D-Mannose 6-phosphate	D-¸ÊÂ¶ÌÇ6-Á×Ëá	0.87	C6H13O9P	260.14	Carbohydrates And Its Derivatives	ÌÇÀà¼°ÆäÑÜÉúÎï	"3672-15-9"	418200000	150800000	137700000	315900000	330700000	126000000	0.91470359823971	-0.128623768567	0.785090977521947	0.444444444444444	0.397786305317989
Com_570_pos	2-(Formylamino)Benzoic Acid	2-(¼×õ£°±»ù)±½¼×Ëá	4.07	C8H7NO3	164.138	Benzoic Acid And Its Derivatives	±½¼×Ëá¼°ÆäÑÜÉúÎï	"3342-77-6"	14380000	9527000	15710000	17100000	9102000	9777000	1.10111453903666	0.13896454729	0.671756267091945	0.555555555555556	0.493787288422496
Com_571_pos	L-Cysteine-glutathione gisulfide	L-°ëë×°±Ëá¹Èë×¸ÊëÄ¶þÁò»¯Îï	0.96	C13H22N4O8S2	426.466	Amino Acid And Its Derivatives	°±»ùËá¼°ÆäÑÜÉúÎï	"13081-14-6"	79210	65210	183900	94850	19350	14640	2.54827693262962	1.34952207022	0.168168095668279	0.777777777777778	1.38775113595683
Com_572_pos	L-Cystathionine	L-ë×ÁòÃÑ	0.84	C7H14N2O4S	222.262	Amino Acid And Its Derivatives	°±»ùËá¼°ÆäÑÜÉúÎï	"56-88-2"	107600	144900	111200	114800	88570	78280	1.29131901295935	0.368845454216	0.154513454721165	0.777777777777778	0.874678090130987
Com_573_pos	L-Methionine Methyl Ester	L-µ°°±Ëá¼×õ¥	0.95	C6H14ClNO2S	199.699	Amino Acid And Its Derivatives	°±»ùËá¼°ÆäÑÜÉúÎï	"2491-18-1"	190100	161600	133600	182600	238000	199200	0.782994514359471	-0.352925894822	0.129419912471851	0.888888888888889	1.18604979630354
Com_574_pos	Methionine sulfoxide	µ°°±Ëáí¿	0.92	C5H11NO4S	181.21	Amino Acid And Its Derivatives	°±»ùËá¼°ÆäÑÜÉúÎï	"62697-73-8"	181300	128500	115900	147400	162800	145200	0.934782608695652	-0.0972972013549	0.598642834160044	0.666666666666667	0.532172504815729
Com_575_pos	L-Saccharopine	L-½ÍÄ¸°±Ëá	1.03	C11H20N2O6	276.286	Amino Acid And Its Derivatives	°±»ùËá¼°ÆäÑÜÉúÎï	"997-68-2"	340900	122600	260500	832900	1434000	280800	0.284177885936335	-1.81513380312	0.127331558817942	0.888888888888889	1.50613827017344
Com_576_pos	L-Methionine sulfone	L-µ°°±Ëáí¿	1.84	C5H11NO4S	181.21	Amino Acid And Its Derivatives	°±»ùËá¼°ÆäÑÜÉúÎï	"7314-32-1"	50680000	53710000	57370000	55450000	28300000	33360000	1.38126547690206	0.465990629807	0.210927326030121	0.777777777777778	1.2601624166193
Com_577_pos	L-Tyrosine	L-ÀÒ°±Ëá	1.84	C9H11NO3	181.189	Amino Acid And Its Derivatives	°±»ùËá¼°ÆäÑÜÉúÎï	"60-18-4"	51650000	56910000	59640000	57280000	29770000	34590000	1.38276882604406	0.467559984112	0.204043055850685	0.777777777777778	1.28703254742233
Com_578_pos	L-Canavanine	L-¶¹°±Ëá	2.96	C5H12N4O3	176.174	Amino Acid And Its Derivatives	°±»ùËá¼°ÆäÑÜÉúÎï	"543-38-4"	63500	33780	88850	46090	65120	60900	1.08145953169485	0.112979680542	0.966640122661156	0.555555555555556	0.030037775322981
Com_579_pos	L-Alanyl-L-Lysine	L-±û°±õ£-Àµ°±Ëá	2.57	C9H19N3O3	217.265	Amino Acid And Its Derivatives	°±»ùËá¼°ÆäÑÜÉúÎï	"5051-06-9"	67500	36110	23840	23680	40100	46000	1.16095828019676	0.215316128935	0.80845439703568	0.444444444444444	0.479576665317007
Com_57_neg	4-Hydroxy-6-methyl-2-pyrone	4-ôÇ»ù-6-¼×»ù-2-ßÁà«Íª	0.84	C6H6O3	126.11	Organoheterocyclic compounds	ÓÐ»úÔÓ»·»¯ºÏÎï	"675-10-5"	149700	353700	369700	247800	143000	393900	1.11265451765006	0.154005701354	0.799402673686768	0.555555555555556	0.493517274575206
Com_580_pos	Oleamide	ÓÍËáõ£°·	15.08	C18H35NO	281.5	Fatty Acyls	Ö¬·¾õ£Àà	"301-02-0"	93050000	134000000	128900000	168000000	125600000	146200000	0.809345156889495	-0.30517300294	0.209618368316596	0.777777777777778	1.07586428685693
Com_581_pos	Indole-3-acetamide	ßÅßá-3-ÒÒõ£°·	0.81	C10H10N2O	174.2	Indole And Its Derivatives	ßÅßá¼°ÆäÑÜÉúÎï	"879-37-8"	377200	933800	324500	198600	247400	128500	2.84682332463011	1.50935296144	0.0800118414447514	1	1.66533948677261
Com_582_pos	Stachydrine	Ë®ËÕ¼î	0.97	C7H13NO2	143.18	Amino Acid And Its Derivatives	°±»ùËá¼°ÆäÑÜÉúÎï	"471-87-4"	2437000	2068000	1904000	2822000	2834000	2873000	0.751436276234025	-0.41227732988	0.0561104400491841	1	1.6717267975967
Com_583_pos	2-Pyrrolidinone	2-ßÁ¿©ÍéÍª	2.04	C4H7NO	85.1	Organoheterocyclic compounds	ÓÐ»úÔÓ»·»¯ºÏÎï	"616-45-5"	517600	200100	647800	649100	267400	313800	1.10989189628546	0.150419164604	0.88569871273121	0.444444444444444	0.213119296291461
Com_584_pos	7,8-dihydro-L-Biopterin	7,8-¶þÇâL-ÉúÎïµûßÊ	1.85	C9H13N5O3	239.23	Organoheterocyclic compounds	ÓÐ»úÔÓ»·»¯ºÏÎï	"6779-87-9"	12970	8380	6847	14500	9748	5932	0.934294234592445	-0.0980511296007	0.907639193199321	0.555555555555556	0.202438152296906
Com_585_pos	Acetylcarnitine	ÒÒõ£Èâ¼î	1.44	C9H17NO4	203.236	Carnitine	Èâ¼îÀà	"14992-62-2"	46810000	39870000	27420000	43560000	56020000	39180000	0.822283078697031	-0.28229295411	0.344090006752194	0.666666666666667	1.09798033310328
Com_586_pos	Acetylchloline Chloride	ÂÈ»¯ÒÒõ£µ¨¼î	0.9	C7H16NO2	146.21	Cholines	µ¨¼îÀà	"60-31-1"	200600	218100	147700	401500	157000	214600	0.732634846720993	-0.448833772498	0.478164399565547	0.666666666666667	0.667364372298534
Com_587_pos	Adipamide	¼º¶þõ£¶þ°·	0.84	C6H12N2O2	144.172	Hormones	¼¤ËØ	"628-94-4"	17510	12410	12570	19550	24430	29480	0.578410019057991	-0.789835552418	0.0289611497829746	1	1.4654974475727
Com_588_pos	Ala-gly	L-±û°±õ£¸Ê°±Ëá	0.84	C5H10N2O3	146.144	Amino Acid And Its Derivatives	°±»ùËá¼°ÆäÑÜÉúÎï	"687-69-4"	6949000	10780000	10050000	7361000	5680000	7145000	1.37615178836818	0.460639606849	0.140031255145022	0.777777777777778	1.30785915692543
Com_589_pos	Adenylocuccinic Acid	ÏÙÜÕËá»ùçúçêËá	3.68	C14H18N5O11P	463.293	Organic Acid And Its Derivatives	ÓÐ»úËá¼°ÆäÑÜÉúÎï	"19046-78-7"	30900	25170	3456	331200	372500	301400	0.0592239578151428	-4.0776752837	0.0441118512308609	1	1.72764319465739
Com_58_neg	m-Coumaric acid	¼äÏã¶¹Ëá	1.83	C9H8O3	164.16	Cinnamic acids and derivatives	Èâ¹ðËá¼°ÆäÑÜÉúÎï	"588-30-7"	407500	457100	478700	372400	322300	245300	1.42904255319149	0.515048876801	0.079398023836687	1	1.66480539938533
Com_590_pos	S-adenosyl-L-methioninamine	S-ÏÙÜÕ-L-µ°°±Ëá°·	0.86	C15H22N6O5S	398.437	Amino Acid And Its Derivatives	°±»ùËá¼°ÆäÑÜÉúÎï	"91279-78-6"	24800	64870	78820	20270	69610	36750	1.33056937534549	0.412043733853	0.586505071014931	0.666666666666667	0.54470926093646
Com_591_pos	5-Methoxyindole-3-Carbaldehyde	4-¼×Ñõ»ù-ßÅßá-3-¼×È©	11.35	C10H9NO2	175.184	Indole And Its Derivatives	ßÅßá¼°ÆäÑÜÉúÎï	"10601-19-1"	230600	205700	259200	190700	177900	179100	1.2698557604528	0.344664634401	0.0600796369304819	1	1.39555070721897
Com_592_pos	Protocatechualdehyde	Ô­¶ù²èÈ©	1.54	C7H6O3	138.12	Phenols And Its Derivatives	·ÓÀà¼°ÆäÑÜÉúÎï	"139-85-5"	68770	70380	34580	40750	60580	51300	1.13824280940837	0.186808345486	0.744935779708474	0.666666666666667	0.381786029081908
Com_593_pos	Spermine	¾«°·	0.73	C10H26N4	202.34	Polyamine	¶à°·	"71-44-3"	5900000	2196000	2015000	3431000	29040000	20520000	0.190805985922138	-2.38982166293	0.146190624177666	0.888888888888889	1.44493470348244
Com_594_pos	Histamine	×é°·	0.699	C5H9N3	111.15	Amino Acid And Its Derivatives	°±»ùËá¼°ÆäÑÜÉúÎï	"51-45-6"	1472000	2330000	3084000	2905000	2035000	6166000	0.620025211597335	-0.689601215022	0.3599820414398	0.666666666666667	0.932533990857596
Com_595_pos	(+,-)-Octopamine HCl	ÕÂÓã°·	1.034	C8H12ClNO2	189.64	Polyamine	¶à°·	"770-05-8"	4722000	5666000	5365000	5295000	5148000	5559000	0.984439445069366	-0.0226256292227	0.779954293062243	0.555555555555556	0.490794047323199
Com_596_pos	Sepiapterin	Ä«à©ßÊ	0.84	C9H11N5O3	237.22	Organoheterocyclic compounds	ÓÐ»úÔÓ»·»¯ºÏÎï	"17094-01-8"	27860	22470	18070	27860	16580	53900	0.695546064673581	-0.523782030047	0.530336555030276	0.611111111111111	0.564498574093395
Com_597_pos	11-cis-Retinol	11-Ë³ÊÓ»Æ´¼	12.17	C20H30O	286.5	Prenol lipids	Ï©´¼õ¥	"22737-96-8"	3485	5761	2777	2403	8224	1925	0.957855321861058	-0.0621203326589	0.816198068993971	0.666666666666667	0.338942598982306
Com_598_pos	Quinone	±½õ«	7.24	C6H4O2	108.09	Ketones	ÍªÀà	"106-51-4"	38680	29050	31590	30220	53410	52920	0.727352618088612	-0.459273147476	0.258214395525334	0.777777777777778	1.22657650629113
Com_599_pos	L-Leucyl-L-alanine Hydrate	L-ÁÁ°±Ëá-L-±û°±Ëá	3.0	C9H18N2O3	202.25	Amino Acid And Its Derivatives	°±»ùËá¼°ÆäÑÜÉúÎï	"7298-84-2"	1240000	347300	462100	117600	221400	48850	5.28400154698982	2.40163088896	0.0456204700393288	1	1.71582150514217
Com_59_neg	Isocitrate	ÒìÄûÃÊËá	1.46	C6H8O7	192.12	Organic Acid And Its Derivatives	ÓÐ»úËá¼°ÆäÑÜÉúÎï	"320-77-4"	1399000	2078000	2533000	1463000	1492000	2496000	1.10254999082737	0.140844070643	0.705201022493576	0.555555555555556	0.199042842727156
Com_5_neg	Maltotriose	ÂóÑ¿ÈýÌÇ	0.7	C18H32O16	504.437	Carbohydrates And Its Derivatives	ÌÇÀà¼°ÆäÑÜÉúÎï	"1109-28-0"	1223000	1012000	961600	1056000	1235000	1073000	0.950237812128419	-0.0736394788724	0.57883613803586	0.777777777777778	0.486737823710699
Com_600_pos	3-Amino-4-methylpentanoic acid	3-°±»ù-4-¼×»ùÎìËá	1.862	C6H13NO2	131.17	Organic Acid And Its Derivatives	ÓÐ»úËá¼°ÆäÑÜÉúÎï	"5699-54-7"	39650	35430	70040	50560	46340	69830	0.870389252084208	-0.200267353166	0.535351256792055	0.666666666666667	0.596589554182094
Com_601_pos	L-Lysine	L-Àµ°±Ëá	0.74	C6H14N2O2	146.19	Amino Acid And Its Derivatives	°±»ùËá¼°ÆäÑÜÉúÎï	"56-87-1"	89610000	133300000	118000000	91430000	71410000	91920000	1.33816140681426	0.420252141963	0.126971777964672	0.777777777777778	1.33774651792993
Com_602_pos	Cocamidopropyl Betaine	Ò¬ÓÍõ£°·±û»ùÌð²Ë¼î	9.91	C19H38N2O3	342.5	Amino Acid And Its Derivatives	°±»ùËá¼°ÆäÑÜÉúÎï	"86438-79-1"	266800	301700	237300	232800	236000	258200	1.10839064649243	0.148466441342	0.290475428652925	0.888888888888889	0.999193600963308
Com_603_pos	Thiamine	Áò°·ËØ	0.81	C12H17N4OS+	265.35	Vitamins	Î¬ÉúËØ	"70-16-6"	6843	18520	21550	5660	7372	8605	2.16818412903822	1.11648728011	0.193109631534458	0.777777777777778	1.20799448738678
Com_604_pos	Vitamin U	Î¬ÉúËØU	0.75	C6H14ClNO2S	199.7	Vitamins	Î¬ÉúËØ	"3493-12-7"	103500	157900	81660	36390	91270	113252	1.42400544597197	0.509954663763	0.363876338916393	0.666666666666667	0.892881574903809
Com_605_pos	Acetylcholine	ÒÒõ£µ¨¼î	1.02	C7H16INO2	146.207	Cholines	µ¨¼îÀà	"51-84-3"	15350000	10240000	8462000	27870000	10770000	14310000	0.643097261567516	-0.636891148672	0.316013953670976	0.777777777777778	0.898371377979912
Com_606_pos	Metformin	¶þ¼×Ë«ëÒ	0.68	C4H11N5	129.165	Others	ÆäËü	"657-24-9"	788700	677900	687200	760300	970200	910100	0.815647958797243	-0.293981488875	0.0934600576694294	0.888888888888889	1.60188431715645
Com_607_pos	dGMP	2'-ÍÑÑõ-5'-ÄñÜÕËá	1.04	C10H14N5O7P	347.221	Nucleotide And Its Derivates	ºËÜÕËá¼°ÆäÑÜÉúÎï	"902-04-5"	16610	16770	9302	15050	85170	63650	0.260462561786782	-1.94085207673	0.154303235528108	0.777777777777778	1.13561834290221
Com_608_pos	S-Adenosyl-L-homocysteine	S-(5'-ÏÙÜÕ)-L-¸ß°ëë×°±Ëá	1.84	C14H20N6O5S	384.411	Amino Acid And Its Derivatives	°±»ùËá¼°ÆäÑÜÉúÎï	"979-92-0"	1100000	1527000	977400	1300000	1231000	688400	1.11958750077654	0.162967285674	0.61804997742582	0.444444444444444	0.502599553762366
Com_609_pos	thiamine phosphate	Á×ËáÁò°·ËØ	0.84	C12H18ClN4O4PS	380.787	Pyrimidines and pyrimidine derivatives	à×à¤¼°ÆäÑÜÉúÎï	"532-40-1"	82630	143100	167500	86940	78940	77540	1.61543833703065	0.691925682477	0.174415099537648	0.888888888888889	1.33303308425224
Com_60_neg	3-Oxo-7alpha,12alpha-hydroxy-5beta-cholanoic acid	3-ÍÑÇâµ¨Ëá	10.321	C24H38O5	406.562	Bile Acids	µ¨Ö­Ëá	"2304-89-4"	7364	6231	8801	15590	12050	11870	0.56684383700329	-0.818976761152	0.013316399894816	1	1.86057276943824
Com_610_pos	L-arginino-succinate	L-¾«°±Ëá-çúçêËá	2.3	C10H18N4O6	290.273	Amino Acid And Its Derivatives	°±»ùËá¼°ÆäÑÜÉúÎï		53840	65110	42570	53030	45490	52510	1.06945639939085	0.0968776665471	0.711359030608861	0.666666666666667	0.38061521722889
Com_611_pos	L-Normetanephrine	¼×Ñõ»ùÈ¥¼×ÉöÉÏÏÙËØ	4.06	C9H13NO3	183.204	Hormones	¼¤ËØ	"97-31-4"	179300	105100	220300	249200	127800	150500	0.956777251184834	-0.0637450071835	0.880282072436664	0.444444444444444	0.30329822244838
Com_612_pos	Cystine	DL-ë×°±Ëá	0.84	C6H12N2O4S2	240.301	Amino Acid And Its Derivatives	°±»ùËá¼°ÆäÑÜÉúÎï	"923-32-0"	2714000	2382000	3032000	3723000	3791000	2809000	0.787368013174465	-0.344889990686	0.128086098531092	0.888888888888889	1.4152431322772
Com_613_pos	D-Homocysteine	D-¸ß°ëë×°±Ëá	1.86	C4H9NO2S	135.185	Amino Acid And Its Derivatives	°±»ùËá¼°ÆäÑÜÉúÎï	"454-28-4"	181000	191500	230600	216900	118100	134300	1.28510547624121	0.361886774832	0.265193698528834	0.777777777777778	1.07163177380305
Com_614_pos	Dimethyl fumarate	¸»ÂíËá¶þ¼×õ¥	0.9	C6H8O4	144.125	Fatty Acyls	Ö¬·¾õ£Àà	"624-49-7"	739000	494300	383800	468000	689200	389300	1.04565147106369	0.0644020630982	0.892265952277491	0.555555555555556	0.529992278870959
Com_615_pos	Adipic Acid	¼º¶þËá	0.84	C6H10O4	146.14	Fatty Acyls	Ö¬·¾õ£Àà	"124-04-9"	2768000	4294000	3921000	2886000	2197000	3054000	1.3497603539388	0.432703283665	0.161600870047215	0.777777777777778	1.2687715837239
Com_616_pos	Maleic Acid	ÂíÀ´Ëá	0.94	C4H4O4	116.07	Organic Acid And Its Derivatives	ÓÐ»úËá¼°ÆäÑÜÉúÎï	"110-16-7"	3222000	3837000	3102000	2848000	1640000	2055000	1.55295735900963	0.635018216853	0.0865488461108359	1	1.62306767514069
Com_617_pos	Pipecolinic Acid	D-ßßà¤Ëá	0.85	C6H11NO2	129.16	Amino Acid And Its Derivatives	°±»ùËá¼°ÆäÑÜÉúÎï	"1723-00-8"	893400	1528000	1373000	1218000	1074000	1112000	1.11468860164512	0.156640736506	0.66115024595871	0.666666666666667	0.637592607460201
Com_618_pos	Isonicotinamide	ÒìÑÌõ£°·	1.51	C6H6N2O	122.12	Pyridine And Its Derivatives	ßÁà¤¼°ÆäÑÜÉúÎï	"1453-82-3"	56250000	54790000	56950000	36240000	55460000	39520000	1.28021643042219	0.356387729524	0.177818577151836	0.888888888888889	0.933239842953601
Com_619_pos	2,6-Diaminooimelic Acid	2,6-¶þ°±»ù¸ý¶þËá	0.94	C7H14N2O4	190.2	Amino Acid And Its Derivatives	°±»ùËá¼°ÆäÑÜÉúÎï	"583-93-7"	80460	82170	56640	77910	71940	75610	0.972545019072119	-0.040163060944	0.767172623088882	0.666666666666667	0.223977570605895
Com_61_neg	gamma-Muricholate	3a,6a,7a-ÈýôÇ»ù-5¦Â-µ¨Ëá	9.997	C24H40O5	408.57	Bile Acids	µ¨Ö­Ëá	"547-75-1"	7628	20605	17981	3798	16510	25791	1.00249463111998	0.00359451031878	0.795053429519025	0.555555555555556	0.283658366555598
Com_620_pos	1,3-Diaminopropane	1,3-¶þ°±»ù±ûÍé	0.65	C3H10N2	74.13	Amines	°·Àà	"109-76-2"	23860	33370	24560	35040	18900	21290	1.08719925561611	0.120616373433	0.648826808380102	0.666666666666667	0.280065349423739
Com_621_pos	trans-Cinnamic acid	·´Ê½Èâ¹ðËá	4.07	C9H8O2	148.16	Cinnamic acids and derivatives	Èâ¹ðËá¼°ÆäÑÜÉúÎï	"140-10-3"	131700	106300	161300	166000	94740	122800	1.0410908901288	0.0580960254232	0.809999500624273	0.555555555555556	0.398271675251139
Com_622_pos	Pyrrole-2-carboxylate	ßÁ¿©-2-ôÈËá	1.01	C5H5NO2	111.1	Organoheterocyclic compounds	ÓÐ»úÔÓ»·»¯ºÏÎï	"634-97-9"	446000	306200	549600	162800	383000	448700	1.30899949723479	0.388464543168	0.424662356386433	0.666666666666667	0.613275012537212
Com_623_pos	Oxypurinol	ôÇ»ùàÑßÊ	1.68	C5H4N4O2	152.11	Nucleotide And Its Derivates	ºËÜÕËá¼°ÆäÑÜÉúÎï	"2465-59-0"	500600	356400	773400	629300	347400	654200	0.999693420810595	-0.000442368090085	0.970518796237666	0.444444444444444	0.272074664548918
Com_624_pos	PAF C-16	¦¢-ÒÒõ£»ù-¦£-O-Ê®ÁùÍé»ù-L-¦¡-ÂÑÁ×Ö¬	13.8	C26H54NO7P	523.683	Phospholipid	Á×Ö¬	"74389-68-7"	55050	110300	89860	115300	49640	129600	0.866469749439804	-0.206778712605	0.795279044841678	0.666666666666667	0.496939139887842
Com_625_pos	N7-Methylguanosine	7-¼×»ùÄñÜÕ	4.15	C11H17N5O5	298.28	Nucleotide And Its Derivates	ºËÜÕËá¼°ÆäÑÜÉúÎï	"20244-86-4"	275600	249200	344800	412000	276800	271700	0.905361790733993	-0.143433673526	0.621492879528594	0.666666666666667	0.579058058936947
Com_626_pos	7-Methylguanine	7-¼×»ùÄñàÑßÊ	4.09	C6H7N5O	165.153	Nucleotide And Its Derivates	ºËÜÕËá¼°ÆäÑÜÉúÎï	"578-76-7"	47180000	31910000	51080000	56220000	29500000	31750000	1.10811270962799	0.148104629899	0.643250718383224	0.666666666666667	0.533073355167454
Com_627_pos	7-Ketocholesterol	7-Íªµ¨¹Ì´¼	16.92	C27H44O2	400.637	Hormones	¼¤ËØ	"566-28-9"	108300	158700	111500	120300	92160	181400	0.961001371045549	-0.0573896056165	0.948662858235191	0.555555555555556	0.232617389670543
Com_628_pos	Propionyl-L-carnitine	±ûõ£Èâ¼î	2.57	C10H19NO4	217.26	Carnitine	Èâ¼îÀà	"17298-37-2"	1133000	743800	540100	592600	715700	940400	1.07479877262418	0.104066578966	0.871828156034863	0.555555555555556	0.312443146709429
Com_629_pos	Punicic Acid	Ê¯ÁñËá	12.7	C18H30O2	278.43	Fatty Acyls	Ö¬·¾õ£Àà	"544-72-9"	254300	332200	277600	150800	124700	224100	1.72958366693355	0.790424804373	0.0623297927507509	1	1.38530718514834
Com_62_neg	N alpha-Acetyl-L-Arginine	N¦Á-ÒÒõ£-L-¾«°±Ëá	1.03	C8H16N4O3	216.238	Amino Acid And Its Derivatives	°±»ùËá¼°ÆäÑÜÉúÎï	"155-84-0"	18600	28700	6774	21100	11540	16940	1.09064138765631	0.125176808996	0.931129027518306	0.555555555555556	0.113733198717279
Com_630_pos	Pro-Leu	¸¬°±Ëá-ÁÁ°±Ëá	1.72	C11H20N2O3	228.288	Amino Acid And Its Derivatives	°±»ùËá¼°ÆäÑÜÉúÎï	"52899-07-7"	6397000	5551000	11640000	12160000	10690000	7423000	0.779176163578106	-0.359978551468	0.364431952492384	0.777777777777778	0.758726670988806
Com_631_pos	Propionylcholine	±ûõ£µ¨¼î	1.03	C8H18NO2+	160.234	Cholines	µ¨¼îÀà	"5072-54-8"	798900	993200	708800	711600	497100	897600	1.18734273370365	0.247736437796	0.403435950416847	0.666666666666667	0.762572009698569
Com_632_pos	p-Mentha-1,3,8-triene	¶Ô-±¡ºÉ-1,3,8-ÈýÏ©	11.37	C10H14	134.218	Fatty Acyls	Ö¬·¾õ£Àà	"18368-95-1"	1500000	1497000	1546000	1445000	1328000	1336000	1.10562180579216	0.144857974889	0.0510459417718768	1	0.748505107587372
Com_633_pos	Porphobilinogen	µ¨É«ËØÔ­	4.9	C10H14N2O4	226.229	Organic nitrogen compounds	ÓÐ»úµª»¯ºÏÎï	"487-90-1"	241000	199600	246700	227100	128300	157000	1.34133489461358	0.423669483684	0.188765108512048	0.888888888888889	1.31070471683857
Com_634_pos	4-Aminobenzoate	¶Ô-°±»ù±½¼×Ëá	2.74	C7H7NO2	137.136	Benzoic Acid And Its Derivatives	±½¼×Ëá¼°ÆäÑÜÉúÎï	"150-13-0"	6284000	9494000	4858000	4104000	5869000	2818000	1.61332186693769	0.690034293119	0.168712049545056	0.888888888888889	0.77990555599064
Com_635_pos	Picolinamide	ßÁà¤õ£°·	1.51	C6H6N2O	122.125	Pyridine And Its Derivatives	ßÁà¤¼°ÆäÑÜÉúÎï	"1452-77-3"	48490000	47790000	49060000	35270000	49200000	34160000	1.22515383966956	0.292962916406	0.20336679995223	0.666666666666667	0.817535936063874
Com_636_pos	5-Methyl-2'-deoxycytidine	5-¼×»ù-2'-ÍÑÑõ°ûÜÕ	1.722	C10H15N3O4	241.24	Nucleotide And Its Derivates	ºËÜÕËá¼°ÆäÑÜÉúÎï	"838-07-3"	11310	12280	6993	19690	11639	7311	0.791485507246377	-0.337365161221	0.622511931710793	0.666666666666667	0.344737432787707
Com_637_pos	Ethyl chrysanthemumate	¾ÕËáÒÒõ¥	1.18	C12H20O2	196.29	Organoheterocyclic compounds	ÓÐ»úÔÓ»·»¯ºÏÎï	"97-41-6"	7758000	7914000	8229000	5643000	4526000	2772000	1.84692063982691	0.885121876614	0.0882956586307422	1	1.54779560838443
Com_638_pos	Guggulsterone	¹ÌçÞÍª	15.17	C21H28O2	312.446	Hormones	¼¤ËØ	"95975-55-6"	233200	200100	192600	171800	268700	260300	0.893122146118722	-0.163070598657	0.583109791325517	0.666666666666667	0.595238656426877
Com_639_pos	4-Chloro-6-methoxy-2-(methylsulfinyl)pyrimidine	ÄñàÑßÊºËÜÕ	2.72	C10H13N5O5	283.241	Nucleotide And Its Derivates	ºËÜÕËá¼°ÆäÑÜÉúÎï	"85-30-3"	1308000	1567000	1780000	2222000	551200	1063000	1.21344038371305	0.279103230669	0.485726583925314	0.666666666666667	0.535472675879255
Com_63_neg	L-Fucose	L-ÑÒÔåÌÇ	0.98	C6H12O5	164.156	Carbohydrates And Its Derivatives	ÌÇÀà¼°ÆäÑÜÉúÎï	"2438-80-4"	11100	11780	6801	10450	6727	9688	1.10482039828773	0.143811861418	0.708933960948197	0.777777777777778	0.241214396369323
Com_640_pos	Guanine	ÄñàÑßÊ	2.72	C5H5N5O	151.126	Nucleotide And Its Derivates	ºËÜÕËá¼°ÆäÑÜÉúÎï	"73-40-5"	211500	295500	365000	403300	91320	218400	1.22296709769712	0.290385590597	0.513406082296638	0.555555555555556	0.528337889928181
Com_641_pos	Imatinib	ÒÁÂíÌæÄá	11.76	C29H31N7O	493.603	Others	ÆäËü	"152459-95-5"	318000	213000	397900	224000	93800	281100	1.55101018533979	0.633208160449	0.273724987653408	0.777777777777778	0.748855657307884
Com_642_pos	Hydrocortisone 17-butyrate	Çâ»¯¿ÉµÄËÉ¶¡Ëáõ¥	10.51	C25H36O6	432.55	Others	ÆäËü	"13609-67-1"	67350	102300	121200	108400	71800	83240	1.10404646219253	0.14280088712	0.712804659707302	0.555555555555556	0.567142634601836
Com_643_pos	Homoserine	Í¬ÐÍË¿°±Ëá	0.9	C4H9NO3	119.119	Amino Acid And Its Derivatives	°±»ùËá¼°ÆäÑÜÉúÎï	"1927-25-9"	10530000	5555000	13960000	14060000	6147000	8059000	1.06293780513691	0.0880571840321	0.891793728538229	0.444444444444444	0.246866517727254
Com_644_pos	Homocysteic acid	Í¬ÐÍ°ëë×°±Ëá	1.83	C4H9NO5S	183.18	Amino Acid And Its Derivatives	°±»ùËá¼°ÆäÑÜÉúÎï	"1001-13-4"	256900	321000	291000	273500	189700	194900	1.32031606138885	0.400883327778	0.118164432853869	0.888888888888889	1.14483817052451
Com_645_pos	glutathione disulfide	L-¹Èë×¸ÊëÄ	1.81	C20H32N6O12S2	612.631	Amino Acid And Its Derivatives	°±»ùËá¼°ÆäÑÜÉúÎï	"27025-41-8"	370600	698600	492600	501500	572100	594300	0.936387073565562	-0.0948230761055	0.655579368247746	0.666666666666667	0.188610447818027
Com_646_pos	Phe-Pro	L-±½±û°±õ£-L-¸¬°±Ëá	5.58	C14H18N2O3	262.304	Amino Acid And Its Derivatives	°±»ùËá¼°ÆäÑÜÉúÎï	"7669-65-0"	249000	216500	289100	102500	81390	87000	2.78563254457529	1.47800496322	0.000830621082550389	1	1.91628552660768
Com_647_pos	Phe-Phe	L-±½±û°±Ëá-L-±½±û°±Ëá	6.51	C18H20N2O3	312.363	Amino Acid And Its Derivatives	°±»ùËá¼°ÆäÑÜÉúÎï	"2577-40-4"	92060	39130	55250	35470	60540	32080	1.45553907408853	0.54155356927	0.330311879062111	0.777777777777778	0.910970932479359
Com_648_pos	alpha-Nicotinamide adenine dinucleotide	¦Á-ÑÌõ£°·ÏÙàÑßÊ¶þºËÜÕËá	1.04	C21H27N7O14P2	663.425	Nucleotide And Its Derivates	ºËÜÕËá¼°ÆäÑÜÉúÎï	"7298-93-3"	32530000	28810000	33580000	39070000	34000000	30590000	0.915685896199112	-0.127075293191	0.3802996441007	0.777777777777778	0.796823862641662
Com_649_pos	trans-3-Hydroxy-L-proline	·´-3-ôÇ»ù-L-¸¬°±Ëá	2.14	C5H9NO3	131.13	Amino Acid And Its Derivatives	°±»ùËá¼°ÆäÑÜÉúÎï	"4298-08-2"	4308000	2061000	5855000	5143000	2355000	2673000	1.20184839248845	0.265254918345	0.709701375044051	0.555555555555556	0.424478341998811
Com_64_neg	Prostaglandin B2	Ç°ÁÐÏÙËØB2	0.7	C20H30O4	334.45	Hormones	¼¤ËØ	"13367-85-6"	134300	113000	78170	68870	80860	120200	1.20575704812359	0.269939243244	0.453455851097377	0.666666666666667	0.811768651500089
Com_650_pos	4-Acetamidobutanoate	4-ÒÒõ£°±»ù¶¡Ëá	1.03	C6H11NO3	145.156	Organic Acid And Its Derivatives	ÓÐ»úËá¼°ÆäÑÜÉúÎï	"3025-96-5"	38020	39140	42780	333700	188700	230200	0.159367525910178	-2.64957041149	0.00648097426219178	1	1.97176515477206
Com_651_pos	Val-Ser	çÓ°±õ£-Ë¿°±Ëá	1.01	C8H16N2O4	204.224	Amino Acid And Its Derivatives	°±»ùËá¼°ÆäÑÜÉúÎï	"13588-94-8"	198800	125900	243300	121300	74670	73930	2.10448314190441	1.07346595293	0.0460316907622303	1	1.46866518470568
Com_652_pos	L-Alanine	L-±û°±Ëá	0.86	C3H7NO2	89.09	Amino Acid And Its Derivatives	°±»ùËá¼°ÆäÑÜÉúÎï	"56-41-7"	18440000	18470000	20440000	18530000	14880000	18620000	1.10224870267154	0.140449778927	0.306224241092353	0.444444444444444	0.917491777524652
Com_653_pos	L-Aspartic acid	L-Ìì¶¬°±Ëá	0.86	C4H7NO4	133.1	Amino Acid And Its Derivatives	°±»ùËá¼°ÆäÑÜÉúÎï	"56-84-8"	5850000	6438000	10240000	5596000	5284000	7098000	1.25308710646346	0.325486704919	0.374542473220599	0.777777777777778	0.887000563196724
Com_654_pos	beta-Nicotinamide mononucleotide	¦Â-ÑÌõ£°·µ¥ºËÜÕËá	0.993	C11H15N2O8P	334.219	Nucleotide And Its Derivates	ºËÜÕËá¼°ÆäÑÜÉúÎï	"1094-61-7"	872200	693800	1049000	364100	567800	507300	1.81698165647582	0.86154385477	0.029065167010137	1	1.16483070769587
Com_655_pos	Creatine	¼¡Ëá	0.94	C4H9N3O2	131.133	Organic Acid And Its Derivatives	ÓÐ»úËá¼°ÆäÑÜÉúÎï	"57-00-1"	329000000	287700000	313300000	330500000	332400000	299900000	0.965932696302451	-0.0500054255917	0.533858382886614	0.777777777777778	0.569970514174419
Com_656_pos	Choline Glycerophosphate	¸ÊÓÍÁ×Ö¬µ¨¼î	0.89	C8H20NO6P	257.22	Cholines	µ¨¼îÀà	"28319-77-9"	14160000	6951000	9862000	14390000	11810000	19890000	0.672011282273812	-0.573442640538	0.184951492764709	0.888888888888889	0.902922887515018
Com_657_pos	DL-Citrulline	DL-¹Ï°±Ëá	0.9	C6H13N3O3	175.19	Amino Acid And Its Derivatives	°±»ùËá¼°ÆäÑÜÉúÎï	"627-77-0"	1166000	1963000	1138000	1062000	925300	826100	1.51667022108481	0.600907425646	0.148235755574224	1	1.5422964627135
Com_658_pos	4-Aminobutyric acid	¦Ã-°±»ù¶¡Ëá	0.864	C4H9NO2	103.12	Organic Acid And Its Derivatives	ÓÐ»úËá¼°ÆäÑÜÉúÎï	"56-12-2"	294200	392300	397100	323600	197300	309600	1.30475617098134	0.383780225352	0.219803714149367	0.777777777777778	1.10957959505662
Com_659_pos	Glycine	¸Ê°±Ëá	0.88	C2H5NO2	75.07	Amino Acid And Its Derivatives	°±»ùËá¼°ÆäÑÜÉúÎï	"56-40-6 "	408000	414400	577700	438600	194200	317300	1.4736343542785	0.559378599936	0.205419877310464	0.777777777777778	1.23391468505924
Com_65_neg	Uridine 5'-Diphospho-N-Acetylgalactosamine	ÄòÜÕ-5'-¶þÁ×Ëá-N-ÒÒõ£»ù°±»ù°ëÈéÌÇ	1.0	C17H27N3O17P2	607.354	Nucleotide And Its Derivates	ºËÜÕËá¼°ÆäÑÜÉúÎï	"7277-98-7"	2237000	2188000	2107000	2631000	1497000	3856000	0.81813627254509	-0.289586929776	0.685166970806941	0.666666666666667	0.495832721336927
Com_660_pos	L-Arginine	¾«°±Ëá	0.794	C6H14N4O2	174.2	Amino Acid And Its Derivatives	°±»ùËá¼°ÆäÑÜÉúÎï	"74-79-3"	8006000	22670000	7954000	4567000	5259000	2862000	3.04460907944515	1.60625700142	0.080931854867223	1	1.68237970955088
Com_661_pos	L-Cysteine	L-°ëë×°±Ëá	0.88	C3H7NO2S	121.16	Amino Acid And Its Derivatives	°±»ùËá¼°ÆäÑÜÉúÎï	"52-90-4"	476200	295800	531900	494600	350100	376300	1.06789516789517	0.0947700288785	0.83677978213594	0.555555555555556	0.264944089943004
Com_662_pos	Nicotinate ribonucleoside	ÑÌËáºËÜÕ	1.04	C11H13NO6	255.224	Carbohydrates And Its Derivatives	ÌÇÀà¼°ÆäÑÜÉúÎï	"17720-18-2"	20420	17750	46380	21160	62620	31750	0.731844542543062	-0.450390869221	0.521671974402457	0.777777777777778	0.664032998066123
Com_663_pos	S-Methyl-L-cysteine	S-¼×»ù-L-°ëë×°±Ëá	1.04	C4H9NO2S	135.185	Amino Acid And Its Derivatives	°±»ùËá¼°ÆäÑÜÉúÎï	"1187-84-4"	628600	527200	486000	1975000	2226000	1825000	0.272452704945237	-1.87592228064	0.000252873796726951	1	1.8360604849301
Com_664_pos	MAG (18:2)	µ¥õ£¸ÊÓÍõ¥ (õ£»ù 18:2)	14.64	C21H38O4	354.1	Glycerolipids	¸ÊÓÍÖ¬Àà		10770	11670	13080	8864	14060	4861	1.278387619219	0.3543253414	0.392573420437346	0.666666666666667	0.906812121844137
Com_665_pos	Tetraethylammonium fluoride dihydrate	°ûà×à¤ºËÜÕ	1.04	C8H20FN	149.25	Nucleotide And Its Derivates	ºËÜÕËá¼°ÆäÑÜÉúÎï	"63123-01-3"	672900	655900	760700	642800	351200	614000	1.29944029850746	0.377890352143	0.265703060608878	1	0.915045926965076
Com_666_pos	Cholesterol	µ¨¹Ì´¼	11.2	C27H46O	386.654	Hormones	¼¤ËØ	"57-88-5"	447000	362200	374300	370300	377900	337100	1.09048189440708	0.124965816686	0.340727981609397	0.666666666666667	0.76081940944642
Com_667_pos	5'-Deoxy-5'-(methylthio)adenosine	5-ÍÑÑõ-5-¼×ÁòÏÙÜÕ	4.91	C11H15N5O3S	297.333	Nucleotide And Its Derivates	ºËÜÕËá¼°ÆäÑÜÉúÎï	"2457-80-9"	730600	615800	681300	715700	765900	603200	0.972611281657713	-0.0400647688904	0.786826060734079	0.555555555555556	0.253676701180312
Com_668_pos	L-Valine	L-çÓ°±Ëá	1.2	C5H11NO2	117.146	Amino Acid And Its Derivatives	°±»ùËá¼°ÆäÑÜÉúÎï	"72-18-4"	1876000	1002000	2559000	2374000	1005000	1261000	1.17176724137931	0.228686022783	0.699643063239644	0.555555555555556	0.424980299644183
Com_669_pos	Hypoxanthine-9-beta-D-Arabinofuranoside	°¢ÌÇ¼¡ÜÕ	2.58	C10H12N4O5	268.226	Nucleotide And Its Derivates	ºËÜÕËá¼°ÆäÑÜÉúÎï	"7013-16-3"	19370000	27750000	15030000	10580000	17860000	7017000	1.75282736836168	0.809683915623	0.147291718259834	0.888888888888889	0.958462867778145
Com_66_neg	D-Glucuronic acid	ÆÏÌÑÌÇÈ©Ëá	0.894	C6H10O7	194.14	Sugar Acids And Its Derivatives	ÌÇËá¼°ÆäÑÜÉúÎï	"6556-12-3"	33610	76680	54830	31370	44270	66200	1.16412859560068	0.219250434525	0.67992217742196	0.666666666666667	0.470890178833749
Com_670_pos	4-aminobutyrate	4-°±»ù¶¡Ëáõ¥	0.84	C4H9NO2	103.12	Organic Acid And Its Derivatives	ÓÐ»úËá¼°ÆäÑÜÉúÎï		91740	165700	118400	100800	69950	102600	1.37494055240534	0.459369242925	0.231242168562003	0.777777777777778	1.0650087135483
Com_671_pos	3-Methylhistidine	3-N-¼×»ù-L-×é°±Ëá	0.76	C7H13N3O3	169.181	Amino Acid And Its Derivatives	°±»ùËá¼°ÆäÑÜÉúÎï	"368-16-1"	34620000	25220000	35370000	42910000	40080000	41990000	0.761801888302128	-0.392512230928	0.117907373346582	1	1.69835663031026
Com_672_pos	3-OH-anthranilate	3-ôÇ»ù-ÁÚ°±»ù±½¼×Ëáõ¥	1.68	C7H7NO3	153.14	Organic Acid And Its Derivatives	ÓÐ»úËá¼°ÆäÑÜÉúÎï		273200	351900	480400	199000	172700	227200	1.8458841208883	0.884311987725	0.0494423053638445	1	1.6652781825012
Com_673_pos	3-Methoxytyramine	3-¼×ÑõÀÒ°·	18.4	C9H13NO2	167.205	Phenols And Its Derivatives	·ÓÀà¼°ÆäÑÜÉúÎï	"554-52-9"	243600	246400	252400	168600	190500	240300	1.23857190523857	0.308677626614	0.161740192998004	1	1.34135126279108
Com_674_pos	3-Nitro-L-Tyrosine	3-Ïõ»ù-L-ÀÒ°±Ëá	8.98	C9H10N2O5	226.186	Amino Acid And Its Derivatives	°±»ùËá¼°ÆäÑÜÉúÎï	"621-44-3"	137400	118100	123300	121100	110600	122800	1.06854724964739	0.0956507033415	0.311676195442497	0.777777777777778	1.02974714557919
Com_675_pos	3-amino isobutanoate	3-°±»ùÒì¶¡Ëáõ¥	0.91	C4H9NO2	103.12	Amino Acid And Its Derivatives	°±»ùËá¼°ÆäÑÜÉúÎï		27490	22520	21830	14950	28370	35280	0.913994910941476	-0.129741962405	0.909238233047543	0.666666666666667	0.286847418252877
Com_676_pos	3-Guanidinopropanoate	3-ëÒ»ù±ûËá	0.9	C4H9N3O2	131.133	Organic nitrogen compounds	ÓÐ»úµª»¯ºÏÎï	"353-09-3"	9481000	8512000	8990000	10380000	11360000	9323000	0.868654025689727	-0.203146411298	0.120375644991413	0.888888888888889	1.58974931013543
Com_677_pos	3,5-Diiodo-L-thyronine	3,5-¶þµâ-L-¼××´ÏÙËØ	0.71	C15H13I2NO4	525.077	Organic Acid And Its Derivatives	ÓÐ»úËá¼°ÆäÑÜÉúÎï	"1041-01-6"	45110	30270	31520	25840	21730	12910	1.76752645502646	0.821731808387	0.0852745629900967	1	1.63152830031005
Com_678_pos	3'-Adenylic acid	ÏÙÜÕ-3'-Á×Ëá	5.13	C10H14N5O7P	347.221	Nucleotide And Its Derivates	ºËÜÕËá¼°ÆäÑÜÉúÎï	"84-21-9"	485100	407500	444500	576000	540300	397000	0.883565717306549	-0.178590652237	0.437519645331662	0.666666666666667	0.441710999598974
Com_67_neg	L-Lactic acid	L-ÈéËá	1.487	C3H6O3	90.08	Organic Acid And Its Derivatives	ÓÐ»úËá¼°ÆäÑÜÉúÎï	"79-33-4"	2225000	2605000	2498000	2751000	2392000	2439000	0.966499604326035	-0.0491589530737	0.621847893698366	0.444444444444444	0.466873765298539
Com_68_neg	L-Malate	Æ»¹ûËá	1.089	C4H6O5	134.09	Tca Cycle	ÈýôÈËáÑ­»·	"97-67-6"	9887000	14740000	8781000	11230000	9545000	9992000	1.08583872330744	0.118809839456	0.747175549276948	0.555555555555556	0.27794948728377
Com_69_neg	3-Methyladipic acid	3-¼×»ù¼º¶þËá	5.747	C7H12O4	160.17	Fatty Acyls	Ö¬·¾õ£Àà	"3058-01-3"	221400	247700	213000	207300	199000	256000	1.02989581760531	0.0424984043734	0.73274574307579	0.666666666666667	0.3527064469905
Com_6_neg	12(S)-HETE	12-ôÇ¶þÊ®ÍéËÄÏ©Ëá	13.03	C20H32O3	320.466	Eicosanoid	Ñõ»¯Ö¬ÖÊ	"54397-83-0"	11510	6605	10560	4054	3945	6832	1.93345020565033	0.951177609527	0.0555246956039763	0.888888888888889	1.19183421948076
Com_70_neg	CTP	5'-ÈýÁ×Ëá°ûÜÕ	0.87	C9H16N3O14P3	483.156	Nucleotide And Its Derivates	ºËÜÕËá¼°ÆäÑÜÉúÎï	"65-47-4"	112300	216200	208300	146600	82400	118900	1.54297211842483	0.62571199258	0.200168365186159	0.777777777777778	1.33486075438565
Com_71_neg	Prostaglandin H2	Ç°ÁÐÏÙËØH2	9.33	C20H32O5	352.465	Hormones	¼¤ËØ	"42935-17-1"	15470	20830	4618	3190	9141	38160	0.810401853795726	-0.303290620577	0.91603793374995	0.555555555555556	0.208526876088609
Com_72_neg	Prostaglandin D2	Ç°ÁÐÏÙËØD2	9.34	C20H32O5	352.465	Hormones	¼¤ËØ	"41598-07-6"	13660	21160	4851	3902	7361	39000	0.789268447963711	-0.341412018127	0.931879789366828	0.555555555555556	0.147895874609463
Com_73_neg	Phosphocreatine	¼¡ËáÁ×Ëá	0.91	C4H10N3O5P	211.113	Organic Acid And Its Derivatives	ÓÐ»úËá¼°ÆäÑÜÉúÎï	"67-07-2"	1321000	483300	48090	231900	40040	59340	5.59161434436127	2.48326486095	0.313793467992379	0.777777777777778	0.975825410562776
Com_74_neg	L-Histidine	L-×é°±Ëá	0.76	C6H9N3O2	155.15	Amino Acid And Its Derivatives	°±»ùËá¼°ÆäÑÜÉúÎï	"71-00-1"	3006000	5717000	4009000	5190000	3871000	3861000	0.985296393747098	-0.0213703180675	0.862741459946691	0.555555555555556	0.36780733673625
Com_75_neg	D-threo-Isocitric acid	D-ËÕ°±Ëá-ÒìÄûÃÊËá	1.41	C6H8O7	192.124	Organic Acid And Its Derivatives	ÓÐ»úËá¼°ÆäÑÜÉúÎï	"6061-97-8"	77960	141700	162500	160700	116500	287100	0.677228424596846	-0.56228556766	0.353045369548072	0.666666666666667	0.479643751271049
Com_76_neg	Stearic acid	Ó²Ö¬Ëá	2.27	C18H36O2	284.477	Fatty Acyls	Ö¬·¾õ£Àà	"57-11-4"	857500	328700	1824000	830100	232100	376100	2.09288743655705	1.06549472006	0.355602579607364	0.777777777777778	0.953302924869143
Com_77_neg	3'-Dephospho-CoA	3'-Á×Ëá¸¨Ã¸A	4.47	C21H35N7O13P2S	687.554	Co-Enzyme Factor	¸¨Ã¸Òò×Ó	"3633-59-8"	68900	95320	86550	7221	42110	31460	3.1039348442277	1.63409827373	0.125993428317315	1	1.33658256807787
Com_78_neg	L-Homoserine	L-¸ßË¿°±Ëá	1.9	C4H9NO3	119.119	Amino Acid And Its Derivatives	°±»ùËá¼°ÆäÑÜÉúÎï	"672-15-1"	12700	29860	3819	18310	40450	31740	0.512475138121547	-0.964446078521	0.256062221505988	0.888888888888889	1.12877790974159
Com_79_neg	DL-o-Tyrosine	DL-O-ÀÒ°±Ëá	1.81	C9H11NO3	181.189	Organic Acid And Its Derivatives	ÓÐ»úËá¼°ÆäÑÜÉúÎï	"2370-61-8"	5914000	6469000	6976000	6516000	2582000	3264000	1.56600873645041	0.647092261159	0.19540589908807	0.777777777777778	1.39850546697157
Com_80_neg	D-Lactic acid	D-ôÇ»ù±ûËá	1.44	C3H6O3	90.08	Organic Acid And Its Derivatives	ÓÐ»úËá¼°ÆäÑÜÉúÎï	"10326-41-7"	2283000	2395000	2166000	1783000	2332000	2019000	1.11574828822954	0.158011593222	0.274746922663415	0.777777777777778	1.06098702228377
Com_81_neg	Dihydroxyacetone phosphate	Á×Ëá¶þôÇ»ù±ûÍª	0.9	C3H7O6P	170.058	Carbohydrates And Its Derivatives	ÌÇÀà¼°ÆäÑÜÉúÎï	"57-04-5"	969200	435188	121600	3630000	1671000	1260000	0.232584666971498	-2.10417210389	0.091535486527457	1	1.32266635536284
Com_82_neg	Sucrose	D-ÕáÌÇ	0.99	C12H22O11	342.297	Carbohydrates And Its Derivatives	ÌÇÀà¼°ÆäÑÜÉúÎï	"57-50-1"	116900	69820	54550	91640	69590	32050	1.24829263245033	0.319956179309	0.542277967840019	0.666666666666667	0.639122807099368
Com_83_neg	D-Ribose 5-phophate	D-ºËÌÇ-5-Á×Ëá	0.89	C5H11O8P	230.11	Organic Acid And Its Derivatives	ÓÐ»úËá¼°ÆäÑÜÉúÎï	"207671-46-3"	4132000	8787000	8340000	2130000	1805000	2391000	3.36057540309832	1.74870827471	0.0306599220352077	1	1.77945317114435
Com_84_neg	D-Xylulose 5-phosphate	D-Ä¾ÍªÌÇ-5-Á×Ëá	0.9	C5H11O8P	230.11	Carbohydrates And Its Derivatives	ÌÇÀà¼°ÆäÑÜÉúÎï	"4212-65-1"	7888000	17700000	19000000	3779000	3338000	4386000	3.87620620707641	1.95464532153	0.036525687349559	1	1.73506849641901
Com_85_neg	D-Xylonate	Ä¾ÌÇËá	0.91	C5H10O6	166.129	Organic Acid And Its Derivatives	ÓÐ»úËá¼°ÆäÑÜÉúÎï	"526-91-0"	1372000	1617000	1311000	2317000	1393000	1521000	0.822022557828331	-0.282750110201	0.388058492721807	0.777777777777778	0.906078544775188
Com_86_neg	dUMP	ÍÑÑõÄòÜÕËá	0.92	C9H13N2O8P	308.182	Nucleotide And Its Derivates	ºËÜÕËá¼°ÆäÑÜÉúÎï	"964-26-1"	44650	77360	55260	67230	121000	193800	0.464021150171453	-1.10773752972	0.133957066540038	0.888888888888889	1.04612362060751
Com_87_neg	Fosfomycin	Á×Ã¹ËØ	11.02	C3H7O4P	138.059	Organic Acid And Its Derivatives	ÓÐ»úËá¼°ÆäÑÜÉúÎï	"23155-02-4"	35180	34690	32440	40080	39560	40060	0.854720133667502	-0.226475988182	0.0217274477324414	1	1.89163960675862
Com_88_neg	Ethylmalonate	ÒÒ»ù±û¶þËá	6.37	C5H8O4	132.115	Organic Acid And Its Derivatives	ÓÐ»úËá¼°ÆäÑÜÉúÎï	"601-75-2"	11600	12750	15370	14820	9039	12940	1.07937715698796	0.110199060786	0.628530265131629	0.444444444444444	0.42170929945432
Com_89_neg	Thymidine 3,5-cyclic monophosphate	ÐØÜÕ3,5-»·µ¥Á×Ëá	4.2	C10H13N2O7P	304.193	Nucleotide And Its Derivates	ºËÜÕËá¼°ÆäÑÜÉúÎï	"6453-60-7"	23090	28510	27160	22160	27940	25790	1.03781789432073	0.0535533165195	0.706665222429484	0.666666666666667	0.363262998421474
Com_8_neg	1-Caffeoylquinic Acid	1-¿§·Èõ£¿üÄþËá	18.71	C16H18O9	354.309	Organic Acid And Its Derivatives	ÓÐ»úËá¼°ÆäÑÜÉúÎï	"1241-87-8"	2650000	2232000	2039000	3132000	3042000	2978000	0.756228146853147	-0.403106547374	0.0609190130815318	1	1.80953151036453
Com_90_neg	Methylmalonate	¼×»ù±û¶þËá	1.938	C4H6O4	118.09	Organic Acid And Its Derivatives	ÓÐ»úËá¼°ÆäÑÜÉúÎï	"516-05-2"	2776000	5502000	923400	3169000	8069000	5669000	0.544236115218549	-0.877695398649	0.276981251819205	0.888888888888889	1.03730295768129
Com_91_neg	Dulcitol	¼ºÁù´¼	0.897	C6H14O6	182.17	Carbohydrates And Its Derivatives	ÌÇÀà¼°ÆäÑÜÉúÎï	"608-66-2"	8088	9096	6608	11760	16930	5882	0.688186972116163	-0.539127513829	0.44814538503496	0.666666666666667	0.63215766792928
Com_92_neg	Gluconolactone	ÆÏÌÇËáÄÚõ¥	1.02	C6H10O6	178.14	Amino Acid And Its Derivatives	°±»ùËá¼°ÆäÑÜÉúÎï	"90-80-2"	45090	45130	51940	23080	36420	42820	1.38936669272869	0.474427417147	0.186062620770239	1	1.27693757241921
Com_93_neg	Sebacic acid	¹ï¶þËá	8.111	C10H18O4	202.248	Organic Acid And Its Derivatives	ÓÐ»úËá¼°ÆäÑÜÉúÎï	"111-20-6"	353100	461200	374200	432600	444700	424200	0.913177103342297	-0.131033408462	0.352587033828136	0.666666666666667	0.873075437215807
Com_94_neg	Tiglic acid	Ìè¸÷Ëá	1.07	C5H8O2	100.116	Fatty Acyls	Ö¬·¾õ£Àà	"80-59-1"	573800	584200	783700	920300	664500	1250000	0.684951319317059	-0.545926638019	0.182758018248434	0.888888888888889	1.13071108907921
Com_95_neg	4-Hydroxyphenylpyruvate	4-ôÇ±½»ù±ûÍªËá	1.38	C9H8O4	180.16	Benzene and substituted derivatives	±½¼°ÆäÈ¡´úÑÜÉúÎï	"156-39-8"	272400	291800	280800	457300	488000	355400	0.649650188360114	-0.622265003464	0.0436310399820442	1	1.64495482128543
Com_96_neg	Oxaloacetate	²Ýõ£ÒÒËá	0.71	C4H4O5	132.072	Organic Acid And Its Derivatives	ÓÐ»úËá¼°ÆäÑÜÉúÎï	"328-42-7"	2265000	2675000	3044000	2064000	4359000	3610000	0.795773945978272	-0.329569429612	0.498262524400328	0.666666666666667	0.76525532466467
Com_97_neg	Tetrahydroaldosterone	ËÄÇâÈ©çÞÍª	0.97	C21H32O5	364.476	Hormones	¼¤ËØ	"13489-75-3"	11240	7988	18220	5950	5447	7853	1.94535064935065	0.960030224355	0.105660640914206	1	1.18972139212087
Com_98_neg	Tolfenamic acid	ÍÐÃðËá	2.15	C14H12ClNO2	261.7	Benzoic Acid And Its Derivatives	±½¼×Ëá¼°ÆäÑÜÉúÎï	"13710-19-5"	157700	106296	53750	126900	102900	67660	1.06819740469307	0.0951782841555	0.98674690907026	0.555555555555556	0.259265310114157
Com_99_neg	3-PRENYL-4-HYDROXYACETOPHENONE	3-ÒìÎìÏ©-4-ôÇ»ù±½ÒÒÍª	3.76	C13H16O2	204.26	Ketones	ÍªÀà	"26932-05-8"	100300	256100	106600	144600	67070	64610	1.67583610829593	0.744881064723	0.288502070764586	0.777777777777778	1.05249900633282
Com_9_neg	D-Glucose 6-phosphate	D-ÆÏÌÑÌÇ-6-Á×Ëá	0.92	C6H13O9P	260.136	Carbohydrates And Its Derivatives	ÌÇÀà¼°ÆäÑÜÉúÎï	"56-73-5"	455500000	139600000	141000000	330800000	343600000	121800000	0.924516453152474	-0.113229100114	0.794343869825153	0.444444444444444	0.380119043749862
