# Supplementary material for: Association analysis of transcriptome and quasi-targeted metabolomics reveals the regulation mechanism underlying broiler muscle tissue development at different levels of dietary guanidinoacetic acid
Source: Frontiers journal article supplement (doi:10.3389/fvets.2024.1384028), 2024-04-25
Supplement: Data_Sheet_1.ZIP [file High_GAA.vs.Control_all_corr.xls]

corr	S-Methyl-L-cysteine	Pyridoxal 5'-phosphate hydrate	Adenine	Phe-Pro	dGDP	1D-chiro-Inositol	N-Acetyl-L-methionine	APS	Mag (18:1)	Adenosine 5'-Diphosphate	Sedoheptulose 7-phosphate	4-Acetamidobutanoate	gamma-Linolenic acid	D-Glucarate	3-Oxo-7alpha,12alpha-hydroxy-5beta-cholanoic acid	CDP	TPP	Nonadecanoic acid	Taurohyodeoxycholic acid sodium salt	Indoxylsulfuric acid	S-Lactoyglutathione	D-Gluconic acid	Phosphonotyrosine	Ectoine	1-Aminocyclopropane-1-carboxylic acid	Glyceraldehyde 3-phosphate diethyl acetal	Adipamide	beta-Nicotinamide mononucleotide	Thymine	D-Arabinose 5-phosphate	Furfural	D-Ribose 5-phophate	SDMA	NADH	5'-Adenylic acid	L-Asparagine	N-Methylnicotinamine	L(+)-Asparagine monohydrate	D-Xylulose 5-phosphate	Ribose 1-phosphate	5-Methyl-dl-tryptophan	Ribulose-5-phosphate	UDP-D-glucuronate	Cis-4,7,10,13,16,19-Docosahexaenoic Acid(C22:6N3)	4-Hydroxyphenylpyruvate	Adenylocuccinic Acid	D-Mannose	Pyridoxal 5-phosphate monohydrate	L-Leucyl-L-alanine Hydrate
S-Methyl-L-cysteine	1	0.986987584066102	0.990348153240281	-0.960805240250826	0.75066946529515	-0.983689416120108	-0.963937064756585	0.775018336861002	-0.962825200029661	0.764112420560155	-0.961727302170311	0.887109383390272	0.929531786514381	-0.958285891781464	0.871668332582447	0.901466829243048	-0.811484637340262	0.943177955122171	0.795206726137398	-0.867160706207832	0.892029512140119	-0.860552919512253	0.833816561157979	0.892389203876051	-0.931469085973207	-0.956455373784018	0.816014403536475	-0.832104037308387	-0.671499190563269	-0.881707395827476	-0.776317185455312	-0.881855459806557	-0.833401159930321	0.972389421706849	0.807952203344309	-0.841016238881243	-0.825065172074673	-0.865392577015683	-0.868192528751029	-0.865178315907776	-0.836709490742793	-0.864185428047955	0.720588341284804	-0.861944778953379	0.933994164824815	0.999088343220206	0.855005574796978	0.90762866065089	-0.630145171911964
Pyridoxal 5'-phosphate hydrate	0.986987584066102	1	0.983016013796069	-0.969664145204399	0.816135147316931	-0.965422519910665	-0.95141741619293	0.836810544545295	-0.947414755150621	0.827892210713562	-0.938266349755936	0.928259767753004	0.962138304687081	-0.944391464658751	0.892804545325711	0.937586195057164	-0.827065132057994	0.923987031382753	0.825737622279556	-0.811424219450627	0.853473487267361	-0.876627580610143	0.780293061116705	0.925530780957571	-0.901851973179279	-0.924780906245235	0.75763430191742	-0.896218713852332	-0.705028733919652	-0.839164829824201	-0.843714748443414	-0.831867230980821	-0.781867603603029	0.961669283505364	0.741667107265829	-0.810738881622822	-0.788482382640213	-0.811973902525664	-0.825619841719578	-0.815989066151295	-0.886650057933227	-0.808795506967383	0.777480674175039	-0.907604599730841	0.938088656471176	0.991768612671965	0.901298184905536	0.93924177079822	-0.70074872210764
Adenine	0.990348153240281	0.983016013796069	1	-0.934640267174962	0.784449669870297	-0.951747964857052	-0.9419886288173	0.80794974833473	-0.932818091949863	0.797643521807815	-0.960444242222935	0.882389824045873	0.928319617203266	-0.967733186790784	0.880581271188358	0.909672839967655	-0.773677666210189	0.94768526313793	0.770030700557099	-0.808504635844809	0.925414873582385	-0.825938261288531	0.755388076701133	0.929953837139166	-0.900496312931435	-0.955564368739297	0.734711681354458	-0.82660724752013	-0.656585456907484	-0.865224568966284	-0.735996209756052	-0.863665724290109	-0.784097518737616	0.988951465787272	0.741460621188686	-0.815297958295464	-0.783695210841472	-0.853124429134919	-0.850372870846573	-0.846865470388324	-0.824517621843042	-0.846468087241285	0.683066886709513	-0.894569186467975	0.972215083516921	0.987518272345131	0.896418751711046	0.900835538499602	-0.604311109573071
Phe-Pro	-0.960805240250826	-0.969664145204399	-0.934640267174962	1	-0.700492204923297	0.980258782665757	0.982504722601724	-0.72297694692884	0.977676915408989	-0.713653970779438	0.86807412016449	-0.862068587268637	-0.949067265434777	0.871805479126901	-0.777627445132311	-0.8504104474973	0.816494330622593	-0.938757604656319	-0.756719501745423	0.848985098853596	-0.805227635189494	0.962929715383169	-0.814567243366671	-0.821080507733084	0.891198522273018	0.932549836743965	-0.838610635499381	0.917063828145827	0.808736808882364	0.845436184774594	0.843294797677763	0.825526510205693	0.798249338736401	-0.899002651804232	-0.822929572918164	0.872591672718018	0.796537503257254	0.817240761475894	0.836377322603665	0.820045449818426	0.943214456547589	0.79510082459435	-0.770818200775557	0.89312846606884	-0.858603362465188	-0.969267358753135	-0.795258804729467	-0.966624503715243	0.679429421484119
dGDP	0.75066946529515	0.816135147316931	0.784449669870297	-0.700492204923297	1	-0.671681895993729	-0.674220246690238	0.999227132073732	-0.683678085146251	0.999758671929368	-0.812646630676482	0.945697071786689	0.868928343257002	-0.846268091265153	0.934402239983477	0.954263054485407	-0.530908765177861	0.606572835030414	0.898013210266963	-0.54746176855806	0.561937782294605	-0.583505246871288	0.426334171241147	0.948070959715871	-0.542023369183938	-0.628172722771137	0.393904600139038	-0.819129865429073	-0.539708363881045	-0.663829956026194	-0.749740068535998	-0.661508317784468	-0.608178278444846	0.821863608494067	0.240912494095354	-0.573736319728793	-0.675138647526963	-0.617258126501797	-0.654529927114679	-0.643703292080894	-0.665509787120327	-0.650743145455636	0.849842612099708	-0.747226220235438	0.775533040361858	0.760476942412776	0.968569250482495	0.667586325071146	-0.549218462034885
1D-chiro-Inositol	-0.983689416120108	-0.965422519910665	-0.951747964857052	0.980258782665757	-0.671681895993729	1	0.981069790660074	-0.696989347473589	0.985180344747431	-0.685681111136818	0.922066243295516	-0.85298003091391	-0.915079004450296	0.910621173079488	-0.807380581388968	-0.849329003374371	0.821434510098496	-0.935194148381966	-0.775056044572254	0.913237974663317	-0.837795873580378	0.910959856124265	-0.890840979044099	-0.813163393351055	0.935643934950059	0.949267171947061	-0.895780374574884	0.836164444447976	0.719353363512117	0.88647529796581	0.794437903393516	0.882323694443574	0.86512774596693	-0.92372148228286	-0.876516799069189	0.876073306216396	0.848380095085995	0.866955461478362	0.876009331171475	0.870450813234732	0.859546126670778	0.86144235585135	-0.736637701384062	0.823883473394	-0.86326213157642	-0.985683594458901	-0.773174422817416	-0.912956392571758	0.629847058412251
N-Acetyl-L-methionine	-0.963937064756585	-0.95141741619293	-0.9419886288173	0.982504722601724	-0.674220246690238	0.981069790660074	1	-0.697935836126356	0.995910754240386	-0.687996936084582	0.895394237149359	-0.831305293181876	-0.941801806986019	0.901581217051671	-0.759727531918822	-0.82449902973707	0.723654038726285	-0.96326212233739	-0.731112254000437	0.899208466930448	-0.842416282530589	0.951866159146502	-0.806895874144446	-0.815132741354025	0.863752954009872	0.974131767126695	-0.866466413260546	0.879699358200852	0.828333476257533	0.922163139521405	0.741247793794812	0.904178313773728	0.861982082754304	-0.925321635289744	-0.829928916220501	0.939678142825376	0.857951632289077	0.905821250048604	0.91552058536089	0.903109455144067	0.900408633560816	0.87942420578894	-0.733906323369412	0.867380061918313	-0.85828215693035	-0.966273926810991	-0.783138757511378	-0.924219312734764	0.537099081126763
APS	0.775018336861002	0.836810544545295	0.80794974833473	-0.72297694692884	0.999227132073732	-0.696989347473589	-0.697935836126356	1	-0.70628050724061	0.999833422319742	-0.83210264436948	0.953496432724362	0.882279309825864	-0.864281323313621	0.943675025021433	0.963798184765821	-0.554868830648578	0.634682548340107	0.901043111751176	-0.568728385309815	0.59235210927082	-0.603799642764905	0.452243004336301	0.959246468032392	-0.572476026372572	-0.655438671804883	0.418346630154973	-0.828253485255546	-0.550016962045087	-0.682417457315014	-0.758727859492958	-0.680415897759279	-0.62461485903692	0.842465164864991	0.274830837188871	-0.592879965122959	-0.687991712149077	-0.637442524504128	-0.672490811870903	-0.662137683825911	-0.682401855993473	-0.669183407271764	0.848449809201519	-0.765502201086743	0.798538405691276	0.784118034871483	0.976495857596898	0.690188656846525	-0.562064591242675
Mag (18:1)	-0.962825200029661	-0.947414755150621	-0.932818091949863	0.977676915408989	-0.683678085146251	0.985180344747431	0.995910754240386	-0.70628050724061	1	-0.696546868470344	0.908730787460548	-0.849438849364408	-0.9404808620246	0.908888204225829	-0.780398433396572	-0.836811964555459	0.723609994011402	-0.937936228229536	-0.77196730892645	0.930301681334695	-0.809658588065423	0.941043821940292	-0.839645991354817	-0.809578487835266	0.862807056282966	0.959056553366868	-0.896134874190249	0.871405387093594	0.81118146686536	0.935170253931449	0.755931027194008	0.921968222727459	0.898702768717078	-0.920721916837704	-0.832944697633241	0.942291110655117	0.894180480792894	0.915585259567202	0.929356476872216	0.919239317085136	0.877929820526793	0.900111827859337	-0.770155660194649	0.829384006951541	-0.833044782121135	-0.965517293865929	-0.777210436835828	-0.899590211533266	0.532899937299578
Adenosine 5'-Diphosphate	0.764112420560155	0.827892210713562	0.797643521807815	-0.713653970779438	0.999758671929368	-0.685681111136818	-0.687996936084582	0.999833422319742	-0.696546868470344	1	-0.822670288950465	0.949828256324806	0.877197829932991	-0.855872051377107	0.938621180351329	0.959314257793699	-0.54367408939399	0.623193310903468	0.898637744075564	-0.558361759450353	0.579280337958234	-0.596241928429225	0.439114742062618	0.954565025644094	-0.55824518912481	-0.643916822810786	0.406612126779159	-0.82580145688308	-0.547869826605596	-0.67409913528708	-0.754839124944124	-0.671587807856355	-0.616307901894329	0.833348518990631	0.259225259407391	-0.585169845338506	-0.681516809076707	-0.628396458073292	-0.664484698100173	-0.653708273394618	-0.67680623390209	-0.660369366042977	0.849025114446965	-0.759295317263007	0.788802150613173	0.7735957950467	0.973454085451336	0.681529106992324	-0.556390392620624
Sedoheptulose 7-phosphate	-0.961727302170311	-0.938266349755936	-0.960444242222935	0.86807412016449	-0.812646630676482	0.922066243295516	0.895394237149359	-0.83210264436948	0.908730787460548	-0.822670288950465	1	-0.907858516953552	-0.894689563169133	0.994143423597162	-0.935904880624509	-0.928513959994969	0.696664182749629	-0.853783795392096	-0.862924818210889	0.873108562170641	-0.840551560359192	0.731981955162702	-0.79386320655409	-0.918132708832087	0.850748991933613	0.899932063531769	-0.769557242585148	0.751346364008795	0.565198636791917	0.907468827144371	0.695032792231731	0.923585908707416	0.880255706996169	-0.977750144216811	-0.692344541544394	0.807560003370759	0.881467792322883	0.893510980775805	0.895173560482042	0.901955078999213	0.694633397784292	0.920131580051574	-0.740551745289287	0.755658181478715	-0.898531772698662	-0.955567469089222	-0.882927227971127	-0.77143090963889	0.502113548685532
4-Acetamidobutanoate	0.887109383390272	0.928259767753004	0.882389824045873	-0.862068587268637	0.945697071786689	-0.85298003091391	-0.831305293181876	0.953496432724362	-0.849438849364408	0.949828256324806	-0.907858516953552	1	0.944182300543888	-0.916662062460298	0.96700761087711	0.992474675837578	-0.718894860203036	0.735757385661505	0.964095436044409	-0.752260282502263	0.645573272649822	-0.751926580422222	0.688430599206557	0.940665140133984	-0.743344656164191	-0.761172148621309	0.654931364353359	-0.886668787575421	-0.627295438557799	-0.781489804212897	-0.878170366554008	-0.782328679117286	-0.773020863659768	0.892684044456705	0.519397661693671	-0.713713032483801	-0.810486550859633	-0.733391337084433	-0.771658860999036	-0.762839176161858	-0.781172901454978	-0.767431131828218	0.922048635513031	-0.786757969494295	0.82030687319836	0.89785435769777	0.94034514911198	0.797764855824968	-0.668949906531475
gamma-Linolenic acid	0.929531786514381	0.962138304687081	0.928319617203266	-0.949067265434777	0.868928343257002	-0.915079004450296	-0.941801806986019	0.882279309825864	-0.9404808620246	0.877197829932991	-0.894689563169133	0.944182300543888	1	-0.920078954871036	0.866039208137564	0.934760703906036	-0.683911104737074	0.88219958092064	0.849941443249199	-0.798256317792526	0.754571027626024	-0.90358920620227	0.674399104326288	0.924107982532019	-0.761708079400528	-0.890447412012487	0.718258974333816	-0.965323716854344	-0.829695955247147	-0.869529388225201	-0.825865167349862	-0.847733656391705	-0.799005158965418	0.930459300325201	0.620898399711914	-0.867049596437338	-0.832575164883868	-0.833781008291807	-0.86309361106991	-0.844317317884859	-0.913938380998657	-0.821977602189143	0.867211157651817	-0.907017932487547	0.868052212761039	0.939075941574076	0.919650491594243	0.908369569500128	-0.595979072171097
D-Glucarate	-0.958285891781464	-0.944391464658751	-0.967733186790784	0.871805479126901	-0.846268091265153	0.910621173079488	0.901581217051671	-0.864281323313621	0.908888204225829	-0.855872051377107	0.994143423597162	-0.916662062460298	-0.920078954871036	1	-0.935100495495934	-0.939195681797637	0.661307237075352	-0.869606621618202	-0.854329878528492	0.845689754062227	-0.852159882002522	0.747419268418973	-0.735566916485733	-0.946625761001491	0.817652962016998	0.910325256373727	-0.728484294014244	0.787497560081366	0.613111912196831	0.913923227723391	0.68628868560865	0.922949279024645	0.860332083728371	-0.990357892992474	-0.647642749610157	0.823321222253079	0.871859575125013	0.899768105594313	0.902439880747833	0.90512614293648	0.724420361842879	0.9169037167259	-0.747940413830864	0.799577401831828	-0.918380209679534	-0.952928920926167	-0.918088423700352	-0.78889557615696	0.482987029384925
3-Oxo-7alpha,12alpha-hydroxy-5beta-cholanoic acid	0.871668332582447	0.892804545325711	0.880581271188358	-0.777627445132311	0.934402239983477	-0.807380581388968	-0.759727531918822	0.943675025021433	-0.780398433396572	0.938621180351329	-0.935904880624509	0.96700761087711	0.866039208137564	-0.935100495495934	1	0.983737029503768	-0.699874852555772	0.690585248239724	0.945665932583386	-0.715566219269809	0.682546750171881	-0.611159201759534	0.675913178971725	0.948075966919089	-0.750646924781761	-0.728955009036895	0.593632129466911	-0.755446460964465	-0.447957820413363	-0.749206173467668	-0.785659518503445	-0.769429589768725	-0.745783301215897	0.900998422057336	0.482128746210039	-0.622846152159992	-0.773129073476404	-0.712982008582292	-0.734932122579112	-0.738928035724657	-0.640238612714774	-0.766386459557643	0.822008019133135	-0.711709334515287	0.841796019700993	0.874075595968799	0.936847325064434	0.703540448413223	-0.61916980607594
CDP	0.901466829243048	0.937586195057164	0.909672839967655	-0.8504104474973	0.954263054485407	-0.849329003374371	-0.82449902973707	0.963798184765821	-0.836811964555459	0.959314257793699	-0.928513959994969	0.992474675837578	0.934760703906036	-0.939195681797637	0.983737029503768	1	-0.723953267827633	0.756606879703702	0.941623533505413	-0.727248977720416	0.70488027970445	-0.720315419230873	0.668279097613717	0.970202630485229	-0.762155008559112	-0.779247820407128	0.617943107319158	-0.859781410030956	-0.584173665068098	-0.776268421790971	-0.844257843624235	-0.780789883579562	-0.748002219550683	0.920983703577235	0.511877056612269	-0.691938081650026	-0.782806854873087	-0.735077925917669	-0.763747058612757	-0.757986518195919	-0.759960907726503	-0.767979024520505	0.869232400972957	-0.80710467184649	0.869959344098178	0.908589614949637	0.965757358792334	0.797684238982176	-0.663160765230456
TPP	-0.811484637340262	-0.827065132057994	-0.773677666210189	0.816494330622593	-0.530908765177861	0.821434510098496	0.723654038726285	-0.554868830648578	0.723609994011402	-0.54367408939399	0.696664182749629	-0.718894860203036	-0.683911104737074	0.661307237075352	-0.699874852555772	-0.723953267827633	1	-0.702406595444099	-0.641739027614774	0.603325044553275	-0.65776344262404	0.695747061555243	-0.818315523125562	-0.645601294750258	0.931210509863501	0.667280007303625	-0.667663006033219	0.659106414874112	0.373295195038038	0.473787190410516	0.87313159617504	0.482265524589334	0.504810512365311	-0.684453358776362	-0.78183900762676	0.457899841865579	0.46970347712952	0.439273786217834	0.452648724463289	0.449213356557944	0.729635914816839	0.456336714017361	-0.567867208528843	0.691145532635258	-0.737997496620484	-0.822403416755403	-0.60881422501451	-0.830784202812146	0.928573393201676
Nonadecanoic acid	0.943177955122171	0.923987031382753	0.94768526313793	-0.938757604656319	0.606572835030414	-0.935194148381966	-0.96326212233739	0.634682548340107	-0.937936228229536	0.623193310903468	-0.853783795392096	0.735757385661505	0.88219958092064	-0.869606621618202	0.690585248239724	0.756606879703702	-0.702406595444099	1	0.582210501467971	-0.790729002585697	0.941248719358168	-0.900521229419952	0.709739922989053	0.803985039861286	-0.86238859601703	-0.989436546580588	0.755999178308769	-0.811966914142255	-0.773722967725364	-0.859382044264876	-0.631158996605115	-0.838306197539114	-0.739383992366693	0.92189286193068	0.810331170443601	-0.879476997568577	-0.727777933731156	-0.860125003535808	-0.848572596602018	-0.836963900733632	-0.874241284379292	-0.811954597905185	0.557516135069313	-0.912176100356062	0.917503065961036	0.939691595699449	0.765388939905912	0.928513577740612	-0.504798370677772
Taurohyodeoxycholic acid sodium salt	0.795206726137398	0.825737622279556	0.770030700557099	-0.756719501745423	0.898013210266963	-0.775056044572254	-0.731112254000437	0.901043111751176	-0.77196730892645	0.898637744075564	-0.862924818210889	0.964095436044409	0.849941443249199	-0.854329878528492	0.945665932583386	0.941623533505413	-0.641739027614774	0.582210501467971	1	-0.762768403376636	0.483717559091242	-0.635061238508932	0.706374721365996	0.843923047459769	-0.660040831985049	-0.63655751155312	0.664124956313019	-0.77537827470906	-0.506891206846483	-0.741518300368538	-0.834914479654511	-0.75725790934274	-0.802452252643409	0.795755093563773	0.458636064081458	-0.644025023879786	-0.837411434882125	-0.68801445896411	-0.734907606624252	-0.734059730629375	-0.63129126924546	-0.753159695973927	0.944283725942645	-0.597655412350789	0.669791152369404	0.805837793886828	0.84399245922275	0.640303054713927	-0.589000728295593
Indoxylsulfuric acid	-0.867160706207832	-0.811424219450627	-0.808504635844809	0.848985098853596	-0.54746176855806	0.913237974663317	0.899208466930448	-0.568728385309815	0.930301681334695	-0.558361759450353	0.873108562170641	-0.752260282502263	-0.798256317792526	0.845689754062227	-0.715566219269809	-0.727248977720416	0.603325044553275	-0.790729002585697	-0.762768403376636	1	-0.668764644316946	0.800488449264396	-0.905598390167858	-0.655783829795852	0.78949544744834	0.856706325286567	-0.968022299517157	0.679716341498818	0.658263090942126	0.939568239964854	0.621191730485506	0.948508735640515	0.984865467722709	-0.817955371196433	-0.834835833678454	0.907406603665629	0.962052951231313	0.926769866347358	0.938155414394065	0.942942798031419	0.66153551180836	0.943731516354325	-0.725734089553092	0.571090344053484	-0.653280074163292	-0.863574548597151	-0.610226328942853	-0.689527987808227	0.348673909434017
S-Lactoyglutathione	0.892029512140119	0.853473487267361	0.925414873582385	-0.805227635189494	0.561937782294605	-0.837795873580378	-0.842416282530589	0.59235210927082	-0.809658588065423	0.579280337958234	-0.840551560359192	0.645573272649822	0.754571027626024	-0.852159882002522	0.682546750171881	0.70488027970445	-0.65776344262404	0.941248719358168	0.483717559091242	-0.668764644316946	1	-0.703806086548732	0.621547914177727	0.795733083751232	-0.84348475107151	-0.932382348697823	0.605953666707964	-0.630109476662933	-0.539952194413562	-0.765776089979598	-0.475780940440317	-0.763448954711464	-0.623291156392858	0.906445695379792	0.727140862566456	-0.724686801845513	-0.600401571569819	-0.785527192822815	-0.74833864108184	-0.750095325738607	-0.697051188225246	-0.748870853411323	0.362127664611631	-0.839967072783485	0.949646391138616	0.877821986134503	0.745630698018587	0.812161643387084	-0.436919892232912
D-Gluconic acid	-0.860552919512253	-0.876627580610143	-0.825938261288531	0.962929715383169	-0.583505246871288	0.910959856124265	0.951866159146502	-0.603799642764905	0.941043821940292	-0.596241928429225	0.731981955162702	-0.751926580422222	-0.90358920620227	0.747419268418973	-0.611159201759534	-0.720315419230873	0.695747061555243	-0.900521229419952	-0.635061238508932	0.800488449264396	-0.703806086548732	1	-0.720921907819295	-0.694469336383925	0.769170111527567	0.884055435615964	-0.81477533040334	0.92050467969401	0.918769437706563	0.807117861609035	0.773983836324733	0.767537650103132	0.744753011210282	-0.787872199842617	-0.785074909718425	0.898114461161445	0.749072386819663	0.778648587290701	0.804777737738484	0.777903016028794	0.966799162071523	0.729295425664572	-0.732408403301841	0.862502539345923	-0.735311381812227	-0.873315796258967	-0.678059056723656	-0.940562737059594	0.577998667893955
Phosphonotyrosine	0.833816561157979	0.780293061116705	0.755388076701133	-0.814567243366671	0.426334171241147	-0.890840979044099	-0.806895874144446	0.452243004336301	-0.839645991354817	0.439114742062618	-0.79386320655409	0.688430599206557	0.674399104326288	-0.735566916485733	0.675913178971725	0.668279097613717	-0.818315523125562	0.709739922989053	0.706374721365996	-0.905598390167858	0.621547914177727	-0.720921907819295	1	0.552463375128529	-0.904856296579691	-0.7490777723461	0.949204949808314	-0.570448981853897	-0.439623073900392	-0.735996218209226	-0.71521594141687	-0.759766320718665	-0.838187725272151	0.713323821252067	0.921552565894961	-0.696603036195961	-0.784340180880844	-0.716915950737587	-0.726015613890231	-0.736753602936296	-0.608213507593572	-0.752545019169756	0.626137957894789	-0.496079686739201	0.613313308283273	0.833812271092691	0.493952946973251	0.689188310687867	-0.592235281498156
Ectoine	0.892389203876051	0.925530780957571	0.929953837139166	-0.821080507733084	0.948070959715871	-0.813163393351055	-0.815132741354025	0.959246468032392	-0.809578487835266	0.954565025644094	-0.918132708832087	0.940665140133984	0.924107982532019	-0.946625761001491	0.948075966919089	0.970202630485229	-0.645601294750258	0.803985039861286	0.843923047459769	-0.655783829795852	0.795733083751232	-0.694469336383925	0.552463375128529	1	-0.723424327411191	-0.816148904916383	0.519742584784752	-0.839279453744559	-0.596458632745514	-0.776727273020676	-0.733432102960839	-0.774703523574572	-0.682248240775739	0.949437001112734	0.456060216171779	-0.693648900871346	-0.722028179250073	-0.750133096356735	-0.762978270862991	-0.756000216085284	-0.752797118508378	-0.761352791012291	0.759812253877761	-0.86845013898104	0.933441747687625	0.894089414063993	0.995507160251764	0.800130922965395	-0.574675734640817
1-Aminocyclopropane-1-carboxylic acid	-0.931469085973207	-0.901851973179279	-0.900496312931435	0.891198522273018	-0.542023369183938	0.935643934950059	0.863752954009872	-0.572476026372572	0.862807056282966	-0.55824518912481	0.850748991933613	-0.743344656164191	-0.761708079400528	0.817652962016998	-0.750646924781761	-0.762155008559112	0.931210509863501	-0.86238859601703	-0.660040831985049	0.78949544744834	-0.84348475107151	0.769170111527567	-0.904856296579691	-0.723424327411191	1	0.857542785200833	-0.813023666302583	0.667460934459191	0.471711893644522	0.706796183944816	0.75993213774258	0.71955213903701	0.705725168507916	-0.839934294947024	-0.905403156021302	0.669628129749167	0.66041735928493	0.695263661662822	0.687796806356424	0.692142910858136	0.740219445735011	0.701970118175455	-0.550817572868737	0.740279571218026	-0.848021377164297	-0.929945837524069	-0.667576322772916	-0.857794796062843	0.739675760116817
Glyceraldehyde 3-phosphate diethyl acetal	-0.956455373784018	-0.924780906245235	-0.955564368739297	0.932549836743965	-0.628172722771137	0.949267171947061	0.974131767126695	-0.655438671804883	0.959056553366868	-0.643916822810786	0.899932063531769	-0.761172148621309	-0.890447412012487	0.910325256373727	-0.728955009036895	-0.779247820407128	0.667280007303625	-0.989436546580588	-0.63655751155312	0.856706325286567	-0.932382348697823	0.884055435615964	-0.7490777723461	-0.816148904916383	0.857542785200833	1	-0.804239288402728	0.794099795162036	0.761877308391366	0.920342270942911	0.610819296452009	0.906872591273039	0.820812090110712	-0.945750882067669	-0.815186703798405	0.917819198286752	0.808965253415342	0.922342671907411	0.911155667294492	0.904547354692672	0.832228105206689	0.887089120784504	-0.595196363782368	0.866611259170764	-0.904965220445819	-0.950302831504422	-0.774471040235698	-0.886709210596215	0.441995009748656
Adipamide	0.816014403536475	0.75763430191742	0.734711681354458	-0.838610635499381	0.393904600139038	-0.895780374574884	-0.866466413260546	0.418346630154973	-0.896134874190249	0.406612126779159	-0.769557242585148	0.654931364353359	0.718258974333816	-0.728484294014244	0.593632129466911	0.617943107319158	-0.667663006033219	0.755999178308769	0.664124956313019	-0.968022299517157	0.605953666707964	-0.81477533040334	0.949204949808314	0.519742584784752	-0.813023666302583	-0.804239288402728	1	-0.631884975713048	-0.631881859307595	-0.842736296232862	-0.637891855339165	-0.848077701815371	-0.91530791386377	0.712196608413621	0.91657639904967	-0.850057150274164	-0.8731489294641	-0.828195554808908	-0.841130594808997	-0.843465507674572	-0.666177286212365	-0.83701236915651	0.655358282221833	-0.518376902038055	0.566205514360167	0.816203117928937	0.467795070528443	0.694949983124002	-0.41842443131128
beta-Nicotinamide mononucleotide	-0.832104037308387	-0.896218713852332	-0.82660724752013	0.917063828145827	-0.819129865429073	0.836164444447976	0.879699358200852	-0.828253485255546	0.871405387093594	-0.82580145688308	0.751346364008795	-0.886668787575421	-0.965323716854344	0.787497560081366	-0.755446460964465	-0.859781410030956	0.659106414874112	-0.811966914142255	-0.77537827470906	0.679716341498818	-0.630109476662933	0.92050467969401	-0.570448981853897	-0.839279453744559	0.667460934459191	0.794099795162036	-0.631884975713048	1	0.884043227292768	0.746739039965723	0.859722986805032	0.707200272399504	0.669212240982151	-0.811837302094759	-0.54249890558814	0.799514681950116	0.714726784646374	0.698854304057765	0.74300491850345	0.71169416242536	0.961869107519592	0.670154826035198	-0.867000390493318	0.908894977053479	-0.77180185806938	-0.85106599671972	-0.851681239062304	-0.915629484926733	0.647192019305066
Thymine	-0.671499190563269	-0.705028733919652	-0.656585456907484	0.808736808882364	-0.539708363881045	0.719353363512117	0.828333476257533	-0.550016962045087	0.81118146686536	-0.547869826605596	0.565198636791917	-0.627295438557799	-0.829695955247147	0.613111912196831	-0.447957820413363	-0.584173665068098	0.373295195038038	-0.773722967725364	-0.506891206846483	0.658263090942126	-0.539952194413562	0.918769437706563	-0.439623073900392	-0.596458632745514	0.471711893644522	0.761877308391366	-0.631881859307595	0.884043227292768	1	0.75573824520108	0.580304635169925	0.695646276867209	0.645942232861078	-0.655206566709613	-0.528225585456156	0.883212487622679	0.68379216592496	0.729780545896198	0.763268168603487	0.726057269249136	0.890087361869887	0.65689832536269	-0.683095872140174	0.787239483227834	-0.574741944188762	-0.685789515086623	-0.605624816515039	-0.792381274064506	0.303899757811139
D-Arabinose 5-phosphate	-0.881707395827476	-0.839164829824201	-0.865224568966284	0.845436184774594	-0.663829956026194	0.88647529796581	0.922163139521405	-0.682417457315014	0.935170253931449	-0.67409913528708	0.907468827144371	-0.781489804212897	-0.869529388225201	0.913923227723391	-0.749206173467668	-0.776268421790971	0.473787190410516	-0.859382044264876	-0.741518300368538	0.939568239964854	-0.765776089979598	0.807117861609035	-0.735996218209226	-0.776727273020676	0.706796183944816	0.920342270942911	-0.842736296232862	0.746739039965723	0.75573824520108	1	0.537336362050997	0.995957354719815	0.956473718771893	-0.902548459991509	-0.702286254650034	0.965541045331085	0.960809676406967	0.995975953571002	0.999502619676644	0.99847429035323	0.70220813960412	0.989867513461701	-0.710862220498347	0.695349917549764	-0.757071430174711	-0.87453134695789	-0.743978127841732	-0.715251184100965	0.233236120897505
Furfural	-0.776317185455312	-0.843714748443414	-0.735996209756052	0.843294797677763	-0.749740068535998	0.794437903393516	0.741247793794812	-0.758727859492958	0.755931027194008	-0.754839124944124	0.695032792231731	-0.878170366554008	-0.825865167349862	0.68628868560865	-0.785659518503445	-0.844257843624235	0.87313159617504	-0.631158996605115	-0.834914479654511	0.621191730485506	-0.475780940440317	0.773983836324733	-0.71521594141687	-0.733432102960839	0.75993213774258	0.610819296452009	-0.637891855339165	0.859722986805032	0.580304635169925	0.537336362050997	1	0.527023051211185	0.578384046235745	-0.682702285368313	-0.585127439628047	0.545406564585897	0.59673094252108	0.471739119832216	0.526052529476713	0.506907801772853	0.829038645504548	0.495821613500816	-0.862852473119815	0.727838723968523	-0.664092346680965	-0.800687853692232	-0.736249889732927	-0.83278697435385	0.901972903177429
D-Ribose 5-phophate	-0.881855459806557	-0.831867230980821	-0.863665724290109	0.825526510205693	-0.661508317784468	0.882323694443574	0.904178313773728	-0.680415897759279	0.921968222727459	-0.671587807856355	0.923585908707416	-0.782328679117286	-0.847733656391705	0.922949279024645	-0.769429589768725	-0.780789883579562	0.482265524589334	-0.838306197539114	-0.75725790934274	0.948508735640515	-0.763448954711464	0.767537650103132	-0.759766320718665	-0.774703523574572	0.71955213903701	0.906872591273039	-0.848077701815371	0.707200272399504	0.695646276867209	0.995957354719815	0.527023051211185	1	0.967807910878203	-0.903483410124477	-0.705602639922687	0.940914227696703	0.967343724269669	0.993401126456359	0.994313913111953	0.99809674879095	0.656500851605305	0.998274238941205	-0.700752193254882	0.657768863950531	-0.753263954616136	-0.87269793739322	-0.737734729374428	-0.683558388605693	0.229997811985264
SDMA	-0.833401159930321	-0.781867603603029	-0.784097518737616	0.798249338736401	-0.608178278444846	0.86512774596693	0.861982082754304	-0.62461485903692	0.898702768717078	-0.616307901894329	0.880255706996169	-0.773020863659768	-0.799005158965418	0.860332083728371	-0.745783301215897	-0.748002219550683	0.504810512365311	-0.739383992366693	-0.802452252643409	0.984865467722709	-0.623291156392858	0.744753011210282	-0.838187725272151	-0.682248240775739	0.705725168507916	0.820812090110712	-0.91530791386377	0.669212240982151	0.645942232861078	0.956473718771893	0.578384046235745	0.967807910878203	1	-0.818036622876626	-0.728553000089975	0.902619835881548	0.992432886180968	0.94217517122736	0.957319933836246	0.963417987981375	0.607323922128912	0.968535627545381	-0.760938553222748	0.535161969880549	-0.628792366602894	-0.828800144368239	-0.64524499635636	-0.621284930251334	0.261768559547381
NADH	0.972389421706849	0.961669283505364	0.988951465787272	-0.899002651804232	0.821863608494067	-0.92372148228286	-0.925321635289744	0.842465164864991	-0.920721916837704	0.833348518990631	-0.977750144216811	0.892684044456705	0.930459300325201	-0.990357892992474	0.900998422057336	0.920983703577235	-0.684453358776362	0.92189286193068	0.795755093563773	-0.817955371196433	0.906445695379792	-0.787872199842617	0.713323821252067	0.949437001112734	-0.839934294947024	-0.945750882067669	0.712196608413621	-0.811837302094759	-0.655206566709613	-0.902548459991509	-0.682702285368313	-0.903483410124477	-0.818036622876626	1	0.675048936383312	-0.834359991709856	-0.827221072995993	-0.892458437365131	-0.88989883664882	-0.888523205948715	-0.777718538584476	-0.89172330365426	0.701952503284036	-0.863951726408113	0.957642987658632	0.967180734810856	0.919778983175784	0.844822316557045	-0.508079986595327
5'-Adenylic acid	0.807952203344309	0.741667107265829	0.741460621188686	-0.822929572918164	0.240912494095354	-0.876516799069189	-0.829928916220501	0.274830837188871	-0.832944697633241	0.259225259407391	-0.692344541544394	0.519397661693671	0.620898399711914	-0.647642749610157	0.482128746210039	0.511877056612269	-0.78183900762676	0.810331170443601	0.458636064081458	-0.834835833678454	0.727140862566456	-0.785074909718425	0.921552565894961	0.456060216171779	-0.905403156021302	-0.815186703798405	0.91657639904967	-0.54249890558814	-0.528225585456156	-0.702286254650034	-0.585127439628047	-0.705602639922687	-0.728553000089975	0.675048936383312	1	-0.730257943837569	-0.658648988368657	-0.70441217968783	-0.692295764931328	-0.695377773967326	-0.670739167749638	-0.687214248034623	0.416576635894088	-0.574771347855029	0.633121094635224	0.804332552822247	0.387810519970268	0.754950242434723	-0.523768651925191
L-Asparagine	-0.841016238881243	-0.810738881622822	-0.815297958295464	0.872591672718018	-0.573736319728793	0.876073306216396	0.939678142825376	-0.592879965122959	0.942291110655117	-0.585169845338506	0.807560003370759	-0.713713032483801	-0.867049596437338	0.823321222253079	-0.622846152159992	-0.691938081650026	0.457899841865579	-0.879476997568577	-0.644025023879786	0.907406603665629	-0.724686801845513	0.898114461161445	-0.696603036195961	-0.693648900871346	0.669628129749167	0.917819198286752	-0.850057150274164	0.799514681950116	0.883212487622679	0.965541045331085	0.545406564585897	0.940914227696703	0.902619835881548	-0.834359991709856	-0.730257943837569	1	0.908006263269253	0.958637304809255	0.968718810538221	0.955732246013104	0.793953059005615	0.922619499440764	-0.691112804549498	0.734412199868652	-0.700322978338713	-0.839724436418408	-0.667146411965764	-0.770757975436072	0.240769544875538
N-Methylnicotinamine	-0.825065172074673	-0.788482382640213	-0.783695210841472	0.796537503257254	-0.675138647526963	0.848380095085995	0.857951632289077	-0.687991712149077	0.894180480792894	-0.681516809076707	0.881467792322883	-0.810486550859633	-0.832575164883868	0.871859575125013	-0.773129073476404	-0.782806854873087	0.46970347712952	-0.727777933731156	-0.837411434882125	0.962052951231313	-0.600401571569819	0.749072386819663	-0.784340180880844	-0.722028179250073	0.66041735928493	0.808965253415342	-0.8731489294641	0.714726784646374	0.68379216592496	0.960809676406967	0.59673094252108	0.967343724269669	0.992432886180968	-0.827221072995993	-0.658648988368657	0.908006263269253	1	0.940944884479496	0.962928778191372	0.965242221047176	0.628331403836869	0.966788079112875	-0.812124114428011	0.562293203624621	-0.633920547219999	-0.822842159590919	-0.695474787213461	-0.62434259819664	0.25602625983009
L(+)-Asparagine monohydrate	-0.865392577015683	-0.811973902525664	-0.853124429134919	0.817240761475894	-0.617258126501797	0.866955461478362	0.905821250048604	-0.637442524504128	0.915585259567202	-0.628396458073292	0.893510980775805	-0.733391337084433	-0.833781008291807	0.899768105594313	-0.712982008582292	-0.735077925917669	0.439273786217834	-0.860125003535808	-0.68801445896411	0.926769866347358	-0.785527192822815	0.778648587290701	-0.716915950737587	-0.750133096356735	0.695263661662822	0.922342671907411	-0.828195554808908	0.698854304057765	0.729780545896198	0.995975953571002	0.471739119832216	0.993401126456359	0.94217517122736	-0.892458437365131	-0.70441217968783	0.958637304809255	0.940944884479496	1	0.995288031268945	0.996661286881116	0.665437960780002	0.989419238872334	-0.64542873683579	0.674792951881868	-0.751875234766158	-0.854796504505228	-0.712429117575556	-0.687712658307973	0.178114138984125
D-Xylulose 5-phosphate	-0.868192528751029	-0.825619841719578	-0.850372870846573	0.836377322603665	-0.654529927114679	0.876009331171475	0.91552058536089	-0.672490811870903	0.929356476872216	-0.664484698100173	0.895173560482042	-0.771658860999036	-0.86309361106991	0.902439880747833	-0.734932122579112	-0.763747058612757	0.452648724463289	-0.848572596602018	-0.734907606624252	0.938155414394065	-0.74833864108184	0.804777737738484	-0.726015613890231	-0.762978270862991	0.687796806356424	0.911155667294492	-0.841130594808997	0.74300491850345	0.763268168603487	0.999502619676644	0.526052529476713	0.994313913111953	0.957319933836246	-0.88989883664882	-0.692295764931328	0.968718810538221	0.962928778191372	0.995288031268945	1	0.998407784789344	0.696147498862126	0.988305742746557	-0.711564966110656	0.683093666779562	-0.738428131363786	-0.861275416665919	-0.731453079095891	-0.703078402789623	0.212981570904892
Ribose 1-phosphate	-0.865178315907776	-0.815989066151295	-0.846865470388324	0.820045449818426	-0.643703292080894	0.870450813234732	0.903109455144067	-0.662137683825911	0.919239317085136	-0.653708273394618	0.901955078999213	-0.762839176161858	-0.844317317884859	0.90512614293648	-0.738928035724657	-0.757986518195919	0.449213356557944	-0.836963900733632	-0.734059730629375	0.942942798031419	-0.750095325738607	0.777903016028794	-0.736753602936296	-0.756000216085284	0.692142910858136	0.904547354692672	-0.843465507674572	0.71169416242536	0.726057269249136	0.99847429035323	0.506907801772853	0.99809674879095	0.963417987981375	-0.888523205948715	-0.695377773967326	0.955732246013104	0.965242221047176	0.996661286881116	0.998407784789344	1	0.663208321408333	0.995018369924793	-0.694389150809735	0.656941005064915	-0.73408938906371	-0.856464726913325	-0.721100656101644	-0.679286152819854	0.198166380611341
5-Methyl-dl-tryptophan	-0.836709490742793	-0.886650057933227	-0.824517621843042	0.943214456547589	-0.665509787120327	0.859546126670778	0.900408633560816	-0.682401855993473	0.877929820526793	-0.67680623390209	0.694633397784292	-0.781172901454978	-0.913938380998657	0.724420361842879	-0.640238612714774	-0.759960907726503	0.729635914816839	-0.874241284379292	-0.63129126924546	0.66153551180836	-0.697051188225246	0.966799162071523	-0.608213507593572	-0.752797118508378	0.740219445735011	0.832228105206689	-0.666177286212365	0.961869107519592	0.890087361869887	0.70220813960412	0.829038645504548	0.656500851605305	0.607323922128912	-0.777718538584476	-0.670739167749638	0.793953059005615	0.628331403836869	0.665437960780002	0.696147498862126	0.663208321408333	1	0.612340600230192	-0.731486847130222	0.935784846075278	-0.780290904742225	-0.854154372798313	-0.750864507484955	-0.97414774009465	0.687929563270979
Ribulose-5-phosphate	-0.864185428047955	-0.808795506967383	-0.846468087241285	0.79510082459435	-0.650743145455636	0.86144235585135	0.87942420578894	-0.669183407271764	0.900111827859337	-0.660369366042977	0.920131580051574	-0.767431131828218	-0.821977602189143	0.9169037167259	-0.766386459557643	-0.767979024520505	0.456336714017361	-0.811954597905185	-0.753159695973927	0.943731516354325	-0.748870853411323	0.729295425664572	-0.752545019169756	-0.761352791012291	0.701970118175455	0.887089120784504	-0.83701236915651	0.670154826035198	0.65689832536269	0.989867513461701	0.495821613500816	0.998274238941205	0.968535627545381	-0.89172330365426	-0.687214248034623	0.922619499440764	0.966788079112875	0.989419238872334	0.988305742746557	0.995018369924793	0.612340600230192	1	-0.683569455565346	0.620409742151895	-0.734976953200248	-0.853340676968042	-0.722902289052333	-0.644118371042359	0.196757797973993
UDP-D-glucuronate	0.720588341284804	0.777480674175039	0.683066886709513	-0.770818200775557	0.849842612099708	-0.736637701384062	-0.733906323369412	0.848449809201519	-0.770155660194649	0.849025114446965	-0.740551745289287	0.922048635513031	0.867211157651817	-0.747940413830864	0.822008019133135	0.869232400972957	-0.567867208528843	0.557516135069313	0.944283725942645	-0.725734089553092	0.362127664611631	-0.732408403301841	0.626137957894789	0.759812253877761	-0.550817572868737	-0.595196363782368	0.655358282221833	-0.867000390493318	-0.683095872140174	-0.710862220498347	-0.862852473119815	-0.700752193254882	-0.760938553222748	0.701952503284036	0.416576635894088	-0.691112804549498	-0.812124114428011	-0.64542873683579	-0.711564966110656	-0.694389150809735	-0.731486847130222	-0.683569455565346	1	-0.619984347057116	0.561821218126947	0.741158992063134	0.778197253495462	0.672262518419333	-0.569175197419384
Cis-4,7,10,13,16,19-Docosahexaenoic Acid(C22:6N3)	-0.861944778953379	-0.907604599730841	-0.894569186467975	0.89312846606884	-0.747226220235438	0.823883473394	0.867380061918313	-0.765502201086743	0.829384006951541	-0.759295317263007	0.755658181478715	-0.786757969494295	-0.907017932487547	0.799577401831828	-0.711709334515287	-0.80710467184649	0.691145532635258	-0.912176100356062	-0.597655412350789	0.571090344053484	-0.839967072783485	0.862502539345923	-0.496079686739201	-0.86845013898104	0.740279571218026	0.866611259170764	-0.518376902038055	0.908894977053479	0.787239483227834	0.695349917549764	0.727838723968523	0.657768863950531	0.535161969880549	-0.863951726408113	-0.574771347855029	0.734412199868652	0.562293203624621	0.674792951881868	0.683093666779562	0.656941005064915	0.935784846075278	0.620409742151895	-0.619984347057116	1	-0.917917135637413	-0.870087034527284	-0.863579926744302	-0.955085143172713	0.639175244538613
4-Hydroxyphenylpyruvate	0.933994164824815	0.938088656471176	0.972215083516921	-0.858603362465188	0.775533040361858	-0.86326213157642	-0.85828215693035	0.798538405691276	-0.833044782121135	0.788802150613173	-0.898531772698662	0.82030687319836	0.868052212761039	-0.918380209679534	0.841796019700993	0.869959344098178	-0.737997496620484	0.917503065961036	0.669791152369404	-0.653280074163292	0.949646391138616	-0.735311381812227	0.613313308283273	0.933441747687625	-0.848021377164297	-0.904965220445819	0.566205514360167	-0.77180185806938	-0.574741944188762	-0.757071430174711	-0.664092346680965	-0.753263954616136	-0.628792366602894	0.957642987658632	0.633121094635224	-0.700322978338713	-0.633920547219999	-0.751875234766158	-0.738428131363786	-0.73408938906371	-0.780290904742225	-0.734976953200248	0.561821218126947	-0.917917135637413	1	0.929163723622324	0.904461133145291	0.874179081598828	-0.602259434369218
Adenylocuccinic Acid	0.999088343220206	0.991768612671965	0.987518272345131	-0.969267358753135	0.760476942412776	-0.985683594458901	-0.966273926810991	0.784118034871483	-0.965517293865929	0.7735957950467	-0.955567469089222	0.89785435769777	0.939075941574076	-0.952928920926167	0.874075595968799	0.908589614949637	-0.822403416755403	0.939691595699449	0.805837793886828	-0.863574548597151	0.877821986134503	-0.873315796258967	0.833812271092691	0.894089414063993	-0.929945837524069	-0.950302831504422	0.816203117928937	-0.85106599671972	-0.685789515086623	-0.87453134695789	-0.800687853692232	-0.87269793739322	-0.828800144368239	0.967180734810856	0.804332552822247	-0.839724436418408	-0.822842159590919	-0.854796504505228	-0.861275416665919	-0.856464726913325	-0.854154372798313	-0.853340676968042	0.741158992063134	-0.870087034527284	0.929163723622324	1	0.859370366822976	0.919097633630859	-0.652814523654311
D-Mannose	0.855005574796978	0.901298184905536	0.896418751711046	-0.795258804729467	0.968569250482495	-0.773174422817416	-0.783138757511378	0.976495857596898	-0.777210436835828	0.973454085451336	-0.882927227971127	0.94034514911198	0.919650491594243	-0.918088423700352	0.936847325064434	0.965757358792334	-0.60881422501451	0.765388939905912	0.84399245922275	-0.610226328942853	0.745630698018587	-0.678059056723656	0.493952946973251	0.995507160251764	-0.667576322772916	-0.774471040235698	0.467795070528443	-0.851681239062304	-0.605624816515039	-0.743978127841732	-0.736249889732927	-0.737734729374428	-0.64524499635636	0.919778983175784	0.387810519970268	-0.667146411965764	-0.695474787213461	-0.712429117575556	-0.731453079095891	-0.721100656101644	-0.750864507484955	-0.722902289052333	0.778197253495462	-0.863579926744302	0.904461133145291	0.859370366822976	1	0.782049547245097	-0.569194431487119
Pyridoxal 5-phosphate monohydrate	0.90762866065089	0.93924177079822	0.900835538499602	-0.966624503715243	0.667586325071146	-0.912956392571758	-0.924219312734764	0.690188656846525	-0.899590211533266	0.681529106992324	-0.77143090963889	0.797764855824968	0.908369569500128	-0.78889557615696	0.703540448413223	0.797684238982176	-0.830784202812146	0.928513577740612	0.640303054713927	-0.689527987808227	0.812161643387084	-0.940562737059594	0.689188310687867	0.800130922965395	-0.857794796062843	-0.886709210596215	0.694949983124002	-0.915629484926733	-0.792381274064506	-0.715251184100965	-0.83278697435385	-0.683558388605693	-0.621284930251334	0.844822316557045	0.754950242434723	-0.770757975436072	-0.62434259819664	-0.687712658307973	-0.703078402789623	-0.679286152819854	-0.97414774009465	-0.644118371042359	0.672262518419333	-0.955085143172713	0.874179081598828	0.919097633630859	0.782049547245097	1	-0.748570748466833
L-Leucyl-L-alanine Hydrate	-0.630145171911964	-0.70074872210764	-0.604311109573071	0.679429421484119	-0.549218462034885	0.629847058412251	0.537099081126763	-0.562064591242675	0.532899937299578	-0.556390392620624	0.502113548685532	-0.668949906531475	-0.595979072171097	0.482987029384925	-0.61916980607594	-0.663160765230456	0.928573393201676	-0.504798370677772	-0.589000728295593	0.348673909434017	-0.436919892232912	0.577998667893955	-0.592235281498156	-0.574675734640817	0.739675760116817	0.441995009748656	-0.41842443131128	0.647192019305066	0.303899757811139	0.233236120897505	0.901972903177429	0.229997811985264	0.261768559547381	-0.508079986595327	-0.523768651925191	0.240769544875538	0.25602625983009	0.178114138984125	0.212981570904892	0.198166380611341	0.687929563270979	0.196757797973993	-0.569175197419384	0.639175244538613	-0.602259434369218	-0.652814523654311	-0.569194431487119	-0.748570748466833	1
Methyl beta-D-galactopyranoside	-0.920399913193049	-0.950330812110567	-0.946306509890982	0.922153344432364	-0.757785824166617	0.880078339385057	0.898370050539818	-0.779260396030166	0.866871408650353	-0.771050886240333	0.82738569897206	-0.822305044578437	-0.916160141960778	0.857295791426651	-0.774696985522044	-0.848736067189587	0.766109842420648	-0.940170617146302	-0.648763075887011	0.638858750943503	-0.892714003906372	0.858098705033202	-0.597101282984982	-0.897417092182502	0.828496279008702	0.904640421456452	-0.588308346685832	0.886296091186971	0.730251736987016	0.733617463001157	0.754940584163692	0.708430007632037	0.597010995000769	-0.912933239400936	-0.653673637222738	0.744121955050538	0.61110890600625	0.71573650296007	0.718544497799604	0.699845804218818	0.916052659698429	0.676006793065345	-0.627748020188775	0.987656495398749	-0.960956413270675	-0.925269685195216	-0.880894004476988	-0.964598607578852	0.678787372332515
Val-Ser	-0.795537775034391	-0.817559345201206	-0.759106217321854	0.922715668233359	-0.456666948440138	0.855203853217251	0.886304711470717	-0.479710192430733	0.863680653792124	-0.471221824150089	0.615292116096775	-0.64238302945261	-0.812228392099037	0.627274652948105	-0.492589213030934	-0.614189047479058	0.743156722510213	-0.866660540044045	-0.497544920772487	0.685878437680306	-0.676994167923274	0.972097099680327	-0.680033795467635	-0.592175766161936	0.770169229998973	0.820999282075526	-0.747543420568905	0.861469003571846	0.859201059220527	0.666403412110809	0.758625863923335	0.621515906501486	0.596356544255409	-0.690041162008347	-0.799543444839892	0.788888151986911	0.58771275307048	0.640059380185717	0.661343711830553	0.631236119941417	0.960763258437683	0.576318524594852	-0.607723450727675	0.848323303402764	-0.691456428407192	-0.810653412043613	-0.573064587915532	-0.946062467266495	0.650956237009703
dAMP	0.750165646975549	0.755984194003818	0.678989825283581	-0.756150428808144	0.694616954112899	-0.790577219463552	-0.729113926533534	0.701481961398679	-0.783240183819164	0.696971728918238	-0.782927892583979	0.859661806998222	0.764493174589297	-0.74775861443163	0.809811593399124	0.809578860293873	-0.672759987652815	0.538906848476428	0.935429682226733	-0.84729597473027	0.381585148709458	-0.672247875459878	0.844003008242572	0.655529541964977	-0.687855107863081	-0.600224815547867	0.820014522141194	-0.703371714920465	-0.504894409062227	-0.723923602692266	-0.830492362705634	-0.741498259655672	-0.853662374681993	0.68251108948139	0.612355899529601	-0.664529447049222	-0.859955840517376	-0.669909275677934	-0.721242081484793	-0.722186228784764	-0.60440670013589	-0.736273237974127	0.91467903132127	-0.464304066899629	0.517666372083513	0.762878231367984	0.641515349386115	0.603815320294657	-0.577322482841665
L-Alanyl-L-leucine	-0.812207525368998	-0.872320627561434	-0.795738012554106	0.92637826020377	-0.655285113078999	0.836911870494103	0.861137386112613	-0.671369626875941	0.839777859099535	-0.666034161276757	0.658545942966196	-0.775871477086966	-0.885572676908209	0.683152301497017	-0.634000277552565	-0.75251225131187	0.779663414725362	-0.830720512949908	-0.629775855485485	0.613834696105498	-0.653429056207076	0.941252197585359	-0.608605581998009	-0.72945040058081	0.746623788255118	0.779452972630595	-0.636171967844774	0.9487612783933	0.837712775195955	0.628668441489457	0.873055501377533	0.584820793051189	0.550077833768618	-0.736199455884799	-0.657802598135091	0.721363285917389	0.569263366351109	0.585586955818631	0.620806651113765	0.587325959600181	0.991838861892431	0.53882294589814	-0.729185657862704	0.917109930430981	-0.75633538664073	-0.832824249076102	-0.729775070148074	-0.970736380344837	0.767491200723668
3-OH-anthranilate	-0.846688302830888	-0.830374126102335	-0.84365406378562	0.87420418469116	-0.624079097899076	0.858725036052592	0.938132708951699	-0.642716923067097	0.927363799049364	-0.635732564565679	0.805129970378937	-0.722489672042922	-0.89209906588237	0.836717238424462	-0.633915359580943	-0.713876541463824	0.444947432758534	-0.912328910416033	-0.614932511920296	0.836357486285123	-0.778815538573383	0.898656408765443	-0.608046414615586	-0.751212429077904	0.651958501532172	0.93533730794375	-0.760665071901752	0.834210306758655	0.906727494530764	0.945615129808415	0.534423840975159	0.913723710362151	0.835419322972038	-0.863537495969027	-0.669766415219147	0.983981572760088	0.851696632066914	0.941066809948596	0.94695481801925	0.929804904157214	0.830064480324954	0.891714523566772	-0.662855650723291	0.816237521129319	-0.765405955324402	-0.845270532288302	-0.731276323812595	-0.808138241742832	0.253219933427429
[truncated: 5 more columns]
