# Supplementary material for: Association analysis of transcriptome and quasi-targeted metabolomics reveals the regulation mechanism underlying broiler muscle tissue development at different levels of dietary guanidinoacetic acid
Source: Frontiers journal article supplement (doi:10.3389/fvets.2024.1384028), 2024-04-25
Supplement: Data_Sheet_1.ZIP [file High_GAA.vs.Control_all_Diff.xls]

Compound_ID	Name	Chinese name	RT [min]	Formula	Molecular Weight	Class(English)	Class(Chinese)	CAS	all_High_GAA_1	all_High_GAA_2	all_High_GAA_3	all_NC_1	all_NC_2	all_NC_3	FC	log2FC	Pvalue	ROC	VIP	Up.Down
Com_663_pos	S-Methyl-L-cysteine	S-¼×»ù-L-°ëë×°±Ëá	1.04	C4H9NO2S	135.185	Amino Acid And Its Derivatives	°±»ùËá¼°ÆäÑÜÉúÎï	"1187-84-4"	628600	527200	486000	1975000	2226000	1825000	0.272452704945237	-1.87592228064	0.000252873796726951	1	1.8360604849301	down
Com_215_neg	Pyridoxal 5'-phosphate hydrate	3-ôÇ»ù-2-¼×»ù-5-Á×õ£Ñõ¼×»ù-4-ßÁà¤¼×È©	1.63	C8H10NO6P	247.14	Pyridine And Its Derivatives	ßÁà¤¼°ÆäÑÜÉúÎï	"853645-22-4"	124000	129100	122400	168300	167400	159100	0.758892481810833	-0.398032592575	0.000352133690792777	1	1.55520774195944	down
Com_378_pos	Adenine	ÏÙàÑßÊ	1.032	C5H5N5	135.127	Nucleotide And Its Derivates	ºËÜÕËá¼°ÆäÑÜÉúÎï	"73-24-5"	698500	572900	478400	2933000	3256000	2199000	0.2086075345732	-2.26113682823	0.000631868154074421	1	1.81970298654141	down
Com_646_pos	Phe-Pro	L-±½±û°±õ£-L-¸¬°±Ëá	5.58	C14H18N2O3	262.304	Amino Acid And Its Derivatives	°±»ùËá¼°ÆäÑÜÉúÎï	"7669-65-0"	249000	216500	289100	102500	81390	87000	2.78563254457529	1.47800496322	0.000830621082550389	1	1.91628552660768	up
Com_161_neg	dGDP	¶þÁ×ËáÍÑÑõÄñÜÕ	1.08	C10H15N5O10P2	427.201	Nucleotide And Its Derivates	ºËÜÕËá¼°ÆäÑÜÉúÎï	"3493-09-2"	129300	138500	246500	25240000	8503000	8172000	0.012270070380532	-6.34871266552	0.00170224166760679	1	1.9735376452942	down
Com_371_pos	1D-chiro-Inositol	D-ÊÖÐÔ¼¡´¼	18.32	C6H12O6	180.156	Phenols And Its Derivatives	·ÓÀà¼°ÆäÑÜÉúÎï	"643-12-9"	1452000	1474000	1532000	1122000	1016000	1044000	1.40100565681961	0.486462780929	0.00189566358421917	1	1.97301848144392	up
Com_173_neg	N-Acetyl-L-methionine	N-ÒÒõ£-L-µ°°±Ëá	5.315	C7H13NO3S	191.25	Amino Acid And Its Derivatives	°±»ùËá¼°ÆäÑÜÉúÎï	"65-82-7"	22220	23170	27280	15090	12810	14310	1.72162994551054	0.783775077027	0.00297454829479923	1	2.0112134568166	up
Com_133_neg	APS	5'-ÏÙÜÕËáÁòËá(APS)	1.05	C10H14N5O10PS	427.284	Nucleotide And Its Derivates	ºËÜÕËá¼°ÆäÑÜÉúÎï	"485-84-7"	399300	418100	628100	33390000	12660000	11490000	0.0251216545012165	-5.31492470715	0.00361742145670524	1	1.99910382260712	down
Com_409_pos	Mag (18:1)	µ¥õ£¸ÊÓÍõ¥(õ£»ù18:1)	15.23	C21H40O4	356.2	Glycerolipids	¸ÊÓÍÖ¬Àà		26060	27690	30580	19620	18190	18370	1.50106799572802	0.585989329975	0.00464341909900536	1	1.0444046183306	up
Com_226_neg	Adenosine 5'-Diphosphate	¶þÁ×ËáÏÙÜÕ	1.04	C10H15N5O10P2	427.201	Nucleotide And Its Derivates	ºËÜÕËá¼°ÆäÑÜÉúÎï	"58-64-0"	284500	382200	399000	32540000	11730000	10860000	0.019330672954834	-5.6929643271	0.00510237434374191	1	1.97428069418586	down
Com_159_neg	Sedoheptulose 7-phosphate	7-Á×Ëá¾°Ìì¸ýÌÇ	0.87	C7H13BaO10P	425.473	Carbohydrates And Its Derivatives	ÌÇÀà¼°ÆäÑÜÉúÎï	"2646-35-7"	279800	356400	301600	122700	133600	175600	2.17133595739755	1.11858296251	0.00594575857351572	1	1.95756920653762	up
Com_650_pos	4-Acetamidobutanoate	4-ÒÒõ£°±»ù¶¡Ëá	1.03	C6H11NO3	145.156	Organic Acid And Its Derivatives	ÓÐ»úËá¼°ÆäÑÜÉúÎï	"3025-96-5"	38020	39140	42780	333700	188700	230200	0.159367525910178	-2.64957041149	0.00648097426219178	1	1.97176515477206	down
Com_220_neg	gamma-Linolenic acid	¦Ã-ÑÇÂéËá(C18:3)	12.03	C18H30O2	278.4	Fatty Acyls	Ö¬·¾õ£Àà	"506-26-3"	177200	179300	159900	225500	210400	209000	0.800744301442084	-0.3205864689	0.0100123859394041	1	1.90870059849675	down
Com_164_neg	D-Glucarate	ÆÏÌÑÌÇ¶þËá	0.82	C6H10O8	210.139	Carbohydrates And Its Derivatives	ÌÇÀà¼°ÆäÑÜÉúÎï	"87-73-0"	26030	29710	28000	17510	18660	21520	1.45155139538915	0.537595654679	0.0102852883896842	1	1.82651103068872	up
Com_60_neg	3-Oxo-7alpha,12alpha-hydroxy-5beta-cholanoic acid	3-ÍÑÇâµ¨Ëá	10.321	C24H38O5	406.562	Bile Acids	µ¨Ö­Ëá	"2304-89-4"	7364	6231	8801	15590	12050	11870	0.56684383700329	-0.818976761152	0.013316399894816	1	1.86057276943824	down
Com_242_neg	CDP	5-°ûÜÕ¶þÁ×Ëá	0.99	C9H15N3O11P2	403.176	Nucleotide And Its Derivates	ºËÜÕËá¼°ÆäÑÜÉúÎï	"63-38-7"	9867	7237	38020	434800	255900	252400	0.0584497932350758	-4.09665826851	0.0174200540473271	1	1.86695765062266	down
Com_148_neg	TPP	½¹Á×ËáÁò°·ËØ	0.915	C12H19ClN4O7P2S	460.77	Co-Enzyme Factor	¸¨Ã¸Òò×Ó	"154-87-0"	219400	146300	139100	100200	69980	66610	2.13184678407027	1.09210375526	0.0180753705737971	1	1.53501662847369	up
Com_30_neg	Nonadecanoic acid	ÕýÌ¼Ê®¾ÅËá	18.28	C19H38O2	298.5	Fatty Acyls	Ö¬·¾õ£Àà	"646-30-0"	650700	657000	513500	858600	1022000	828800	0.672178342068355	-0.573084035868	0.0197174626052113	1	1.80709474207978	down
Com_277_neg	Taurohyodeoxycholic acid sodium salt	Å£»ÇÖíÍÑÑõµ¨ËáÄÆÑÎ	8.928	C26H44NNaO6S	521.69	Bile Acids	µ¨Ö­Ëá	"110026-03-4"	16710	10730	18313	46600	25950	39070	0.409899659559219	-1.28665730314	0.0206931545031587	1	1.48046840190906	down
Com_262_neg	Indoxylsulfuric acid	ßÅßáÁòËá	5.62	C8H7NO4S	213.21	Organic Acid And Its Derivatives	ÓÐ»úËá¼°ÆäÑÜÉúÎï	"487-94-5"	6395	8622	8209	5437	4840	3900	1.63828736686182	0.712188437799	0.0212347854739953	1	1.61818861082127	up
Com_424_pos	S-Lactoyglutathione	S-Èéõ£¹Èë×¸ÊëÄ	2.65	C13H21N3O8S	379.386	Amino Acid And Its Derivatives	°±»ùËá¼°ÆäÑÜÉúÎï	"25138-66-3"	37480	16800	6271	177600	326700	101900	0.0998861761794787	-3.32357116078	0.0224689719050968	1	1.68232302410059	down
Com_163_neg	D-Gluconic acid	D-ÆÏÌÑÌÇËá	0.91	C6H12O7	196.155	Sugar Acids And Its Derivatives	ÌÇËá¼°ÆäÑÜÉúÎï	"526-95-4"	172600	147500	225500	112100	97200	89190	1.82786693021542	0.870161045174	0.0234400090904058	1	1.67879950928243	up
Com_36_neg	Phosphonotyrosine	O-Á×ËáÀÒ°±Ëá	0.94	C9H12NO6P	261.168	Amino Acid And Its Derivatives	°±»ùËá¼°ÆäÑÜÉúÎï	"21820-51-9"	89630	79870	95790	109900	128000	144200	0.694294687254645	-0.526379962914	0.0240120123923815	1	1.81900462124954	down
Com_319_pos	Ectoine	ÒÀ¿Ë¶àÒò	0.95	C6H10N2O2	142.156	Others	ÆäËü	"96702-03-3"	525400	483600	479400	2340000	1726000	1161000	0.284752247943371	-1.81222086372	0.0247337951069147	1	2.00454615407363	down
Com_489_pos	1-Aminocyclopropane-1-carboxylic acid	1-°±»ù»·±ûÍéôÈËá	0.89	C4H7NO2	101.048	Amino Acid And Its Derivatives	°±»ùËá¼°ÆäÑÜÉúÎï	"22059-21-8"	2207000	2071000	1943000	1584000	1170000	1355000	1.51399367242638	0.598359175748	0.0267334817014456	1	1.96788868413918	up
Com_247_neg	Glyceraldehyde 3-phosphate diethyl acetal	DL-¸ÊÓÍÈ©Ëõ¶þÒÒ´¼-3-Á×ËáÒ»±µÑÎ	0.96	C7H15BaO7P	379.491	Organic Acid And Its Derivatives	ÓÐ»úËá¼°ÆäÑÜÉúÎï	"93965-35-6"	596200	649100	718400	459500	353000	477200	1.52260215554005	0.606539025732	0.0269225109210052	1	1.35588978479086	up
Com_587_pos	Adipamide	¼º¶þõ£¶þ°·	0.84	C6H12N2O2	144.172	Hormones	¼¤ËØ	"628-94-4"	17510	12410	12570	19550	24430	29480	0.578410019057991	-0.789835552418	0.0289611497829746	1	1.4654974475727	down
Com_654_pos	beta-Nicotinamide mononucleotide	¦Â-ÑÌõ£°·µ¥ºËÜÕËá	0.993	C11H15N2O8P	334.219	Nucleotide And Its Derivates	ºËÜÕËá¼°ÆäÑÜÉúÎï	"1094-61-7"	872200	693800	1049000	364100	567800	507300	1.81698165647582	0.86154385477	0.029065167010137	1	1.16483070769587	up
Com_434_pos	Thymine	ÐØÏÙà×à¤	7.29	C5H6N2O2	126.113	Nucleotide And Its Derivates	ºËÜÕËá¼°ÆäÑÜÉúÎï	"65-71-4"	28340	20920	99570	1837	9870	3503	9.78500986193294	3.29057330489	0.0291172989395695	1	1.73807355580048	up
Com_254_neg	D-Arabinose 5-phosphate	D-°¢À­²®ÌÇ5-Á×Ëáõ¥	0.9	C5H11O8P	230.11	Carbohydrates And Its Derivatives	ÌÇÀà¼°ÆäÑÜÉúÎï	"13137-52-5"	6791000	13900000	14660000	3416000	2938000	3987000	3.41852818876318	1.77337532166	0.0301865382428236	1	1.76206754537072	up
Com_459_pos	Furfural	¿·È©	0.87	C5H4O2	96.08	Aldehydes	È©Àà	"98-01-1"	73360	55870	62750	37950	50400	36530	1.53731582319026	0.620413579957	0.0304840824583372	1	1.60723891938895	up
Com_83_neg	D-Ribose 5-phophate	D-ºËÌÇ-5-Á×Ëá	0.89	C5H11O8P	230.11	Organic Acid And Its Derivatives	ÓÐ»úËá¼°ÆäÑÜÉúÎï	"207671-46-3"	4132000	8787000	8340000	2130000	1805000	2391000	3.36057540309832	1.74870827471	0.0306599220352077	1	1.77945317114435	up
Com_397_pos	SDMA	¶þ¼×»ù-L-¾«°±Ëá	0.913	C8H18N4O2	202.25	Amino Acid And Its Derivatives	°±»ùËá¼°ÆäÑÜÉúÎï	"30344-00-4"	310300	493700	451200	245600	255900	188000	1.82044960116026	0.864294800567	0.0325322599956092	1	1.77353686308171	up
Com_267_neg	NADH	»¹Ô­ÐÍ¸¨Ã¸¢ñ	2.79	C21H29N7O14P2	665.441	Co-Enzyme Factor	¸¨Ã¸Òò×Ó	"58-68-4"	566700	126500	172400	2146000	2166000	1377000	0.152153278256284	-2.71640267676	0.034624380862765	1	1.70549804384821	down
Com_10_neg	5'-Adenylic acid	5'-ÏÙàÑßÊºËÜÕËá	1.036	C10H14N5O7P	347.221	Nucleotide And Its Derivates	ºËÜÕËá¼°ÆäÑÜÉúÎï	"61-19-8"	857200	700600	446700	1780000	6859000	6626000	0.131313462168359	-2.92891326694	0.0347814115146492	1	1.50383520878074	down
Com_15_neg	L-Asparagine	L-Ìì¶¬ÃÅõ£°·	0.843	C4H8N2O3	132.12	Amino Acid And Its Derivatives	°±»ùËá¼°ÆäÑÜÉúÎï	"70-47-3"	236400	402800	566700	159300	109100	120700	3.09920328964277	1.6318973904	0.0349569563490588	1	1.75807125634178	up
Com_536_pos	N-Methylnicotinamine	N-¼×»ùÑÌõ£°·	1.82	C7H8N2O	136.15	Pyridine And Its Derivatives	ßÁà¤¼°ÆäÑÜÉúÎï	"114-33-0"	18020	28520	27050	13010	15990	11660	1.80988686669946	0.855899519434	0.0356194533848797	1	1.68939531017801	up
Com_186_neg	L(+)-Asparagine monohydrate	L-Ìì¶¬õ£°·Ò»Ë®Îï	0.83	C4H8N2O3.H2O	150.13	Amino Acid And Its Derivatives	°±»ùËá¼°ÆäÑÜÉúÎï	"5794-13-8"	486700	1019000	1050000	324500	215800	361800	2.83305620219488	1.5023592222	0.0358401943634043	1	1.60049163361409	up
Com_84_neg	D-Xylulose 5-phosphate	D-Ä¾ÍªÌÇ-5-Á×Ëá	0.9	C5H11O8P	230.11	Carbohydrates And Its Derivatives	ÌÇÀà¼°ÆäÑÜÉúÎï	"4212-65-1"	7888000	17700000	19000000	3779000	3338000	4386000	3.87620620707641	1.95464532153	0.036525687349559	1	1.73506849641901	up
Com_158_neg	Ribose 1-phosphate	ºËÌÇ1-Á×Ëá	0.9	C5H11O8P	230.11	Carbohydrates And Its Derivatives	ÌÇÀà¼°ÆäÑÜÉúÎï	"14075-00-4"	7396000	17310000	17390000	3862000	3138000	4288000	3.72927002126152	1.89889326057	0.0374847835452308	1	1.72260463320068	up
Com_228_neg	5-Methyl-dl-tryptophan	5-¼×»ù-DL-É«°±Ëá	4.26	C12H14N2O2	218.252	Amino Acid And Its Derivatives	°±»ùËá¼°ÆäÑÜÉúÎï	"951-55-3"	211800	112100	268500	50620	53350	59910	3.61484012692214	1.8539318427	0.0383779335809546	1	1.82683255470399	up
Com_140_neg	Ribulose-5-phosphate	ºËÍªÌÇ-5-Á×Ëá	0.93	C5H11O8P	230.02	Carbohydrates And Its Derivatives	ÌÇÀà¼°ÆäÑÜÉúÎï		4064000	9363000	8373000	2206000	1913000	2528000	3.27967504137205	1.71355287599	0.0397143852283716	1	1.7798557155771	up
Com_244_neg	UDP-D-glucuronate	ÄòÜÕ-5'-¶þÁ×ËáÆÏÌÇÈ©Ëá	0.94	C15H22N2O18P2	580.285	Nucleotide And Its Derivates	ºËÜÕËá¼°ÆäÑÜÉúÎï	"2616-64-0"	141700	132900	65690	490200	188700	435800	0.30527496187315	-1.71181882785	0.0423765225422889	1	1.54514019665138	down
Com_223_neg	Cis-4,7,10,13,16,19-Docosahexaenoic Acid(C22:6N3)	Ë³Ê½-4,7,10,13,16,19-¶þÊ®¶þÌ¼ÁùÏ©Ëá	14.89	C22H32O2	328.5	Fatty Acyls	Ö¬·¾õ£Àà	"6217-54-5"	45630	39030	48430	31450	31020	38430	1.31902874132805	0.39947600092	0.0427294249611434	1	1.36329076474906	up
Com_95_neg	4-Hydroxyphenylpyruvate	4-ôÇ±½»ù±ûÍªËá	1.38	C9H8O4	180.16	Benzene and substituted derivatives	±½¼°ÆäÈ¡´úÑÜÉúÎï	"156-39-8"	272400	291800	280800	457300	488000	355400	0.649650188360114	-0.622265003464	0.0436310399820442	1	1.64495482128543	down
Com_589_pos	Adenylocuccinic Acid	ÏÙÜÕËá»ùçúçêËá	3.68	C14H18N5O11P	463.293	Organic Acid And Its Derivatives	ÓÐ»úËá¼°ÆäÑÜÉúÎï	"19046-78-7"	30900	25170	3456	331200	372500	301400	0.0592239578151428	-4.0776752837	0.0441118512308609	1	1.72764319465739	down
Com_144_neg	D-Mannose	D-¸ÊÂ¶ÌÇ	1.41	C6H12O6	180.156	Carbohydrates And Its Derivatives	ÌÇÀà¼°ÆäÑÜÉúÎï	"3458-28-4"	60730	62660	56750	163200	119600	92900	0.479478307159968	-1.06046254943	0.0450766569818365	1	1.36215401077191	down
Com_178_neg	Pyridoxal 5-phosphate monohydrate	5-Á×ËáßÁ¶ßÈ©	1.7	C8H12NO7P	265.16	Vitamins	Î¬ÉúËØ	"41468-25-1"	2011000	2330000	1957000	2583000	2694000	2551000	0.804547777210015	-0.313749998491	0.045619501229569	1	1.20707173254185	down
Com_599_pos	L-Leucyl-L-alanine Hydrate	L-ÁÁ°±Ëá-L-±û°±Ëá	3.0	C9H18N2O3	202.25	Amino Acid And Its Derivatives	°±»ùËá¼°ÆäÑÜÉúÎï	"7298-84-2"	1240000	347300	462100	117600	221400	48850	5.28400154698982	2.40163088896	0.0456204700393288	1	1.71582150514217	up
Com_288_neg	Methyl beta-D-galactopyranoside	¼×»ù-¦Â-D-ßÁà«°ëÈéÌÇÜÕ	1.03	C7H14O6	194.182	Carbohydrates And Its Derivatives	ÌÇÀà¼°ÆäÑÜÉúÎï	"1824-94-8"	13690	10600	14280	5438	4515	8820	2.05454642305439	1.03881992897	0.0457288529210546	1	1.79803379141515	up
Com_651_pos	Val-Ser	çÓ°±õ£-Ë¿°±Ëá	1.01	C8H16N2O4	204.224	Amino Acid And Its Derivatives	°±»ùËá¼°ÆäÑÜÉúÎï	"13588-94-8"	198800	125900	243300	121300	74670	73930	2.10448314190441	1.07346595293	0.0460316907622303	1	1.46866518470568	up
Com_562_pos	dAMP	2'-ÍÑÑõÏÙÜÕ-5'-µ¥Á×Ëá	1.47	C10H14N5O6P	331.222	Nucleotide And Its Derivates	ºËÜÕËá¼°ÆäÑÜÉúÎï	"653-63-4"	2838000	2491000	2856000	3917000	3202000	4333000	0.714722319245547	-0.484545253638	0.0463387659306474	1	1.67756221077563	down
Com_374_pos	L-Alanyl-L-leucine	L-±û°±õ£-L-ÁÁ°±Ëá	4.45	C9H18N2O3	202.251	Amino Acid And Its Derivatives	°±»ùËá¼°ÆäÑÜÉúÎï	"3303-34-2"	580200	251700	643000	119700	141900	125300	3.81209614887568	1.93058450743	0.0475555435019788	1	1.82731821828336	up
Com_672_pos	3-OH-anthranilate	3-ôÇ»ù-ÁÚ°±»ù±½¼×Ëáõ¥	1.68	C7H7NO3	153.14	Organic Acid And Its Derivatives	ÓÐ»úËá¼°ÆäÑÜÉúÎï		273200	351900	480400	199000	172700	227200	1.8458841208883	0.884311987725	0.0494423053638445	1	1.6652781825012	up
