# Supplementary material for: Association analysis of transcriptome and quasi-targeted metabolomics reveals the regulation mechanism underlying broiler muscle tissue development at different levels of dietary guanidinoacetic acid
Source: Frontiers journal article supplement (doi:10.3389/fvets.2024.1384028), 2024-04-25
Supplement: Data_Sheet_1.ZIP [file High_GAA.vs.Control_all_kegg_enrichment.xls]

MapID	MapTitle	Pvalue	x	y	n	N	EnrichDirect	MetaIDs	kegg_cpd_id
map00230	Purine metabolism	0.00999037851977188	7	29	27	292	Over	5'-Adenylic acid, APS, Ribose 1-phosphate, dGDP, Adenosine 5'-Diphosphate, Adenine, dAMP	cpd:C00020,cpd:C00224,cpd:C00620,cpd:C00361,cpd:C00008,cpd:C00147,cpd:C00360
map00030	Pentose phosphate pathway	0.0172682867929701	4	12	27	292	Over	Ribose 1-phosphate, Sedoheptulose 7-phosphate, D-Gluconic acid, D-Xylulose 5-phosphate	cpd:C00620,cpd:C05382,cpd:C00257,cpd:C00231
map04068	FoxO signaling pathway	0.0233602306317538	2	3	27	292	Over	5'-Adenylic acid, Adenosine 5'-Diphosphate	cpd:C00020,cpd:C00008
map00053	Ascorbate and aldarate metabolism	0.040748976967406	3	9	27	292	Over	D-Glucarate, UDP-D-glucuronate, D-Xylulose 5-phosphate	cpd:C00818,cpd:C00167,cpd:C00231
map04142	Lysosome	0.0440490870964025	2	4	27	292	Over	D-Mannose, Adenosine 5'-Diphosphate	cpd:C00159,cpd:C00008
map01100	Metabolic pathways	0.120576216490046	24	218	27	292	Over	5'-Adenylic acid, APS, D-Mannose, TPP, Sedoheptulose 7-phosphate, L-Asparagine, dGDP, D-Gluconic acid, D-Glucarate, gamma-Linolenic acid, Adenosine 5'-Diphosphate, CDP, UDP-D-glucuronate, D-Arabinose 5-phosphate, NADH, Ectoine, Adenine, Thymine, 1-Aminocyclopropane-1-carboxylic acid, dAMP, 4-Acetamidobutanoate, beta-Nicotinamide mononucleotide, D-Xylulose 5-phosphate, 4-Hydroxyphenylpyruvate	cpd:C00020,cpd:C00224,cpd:C00159,cpd:C00068,cpd:C05382,cpd:C00152,cpd:C00361,cpd:C00257,cpd:C00818,cpd:C06426,cpd:C00008,cpd:C00112,cpd:C00167,cpd:C01112,cpd:C00004,cpd:C06231,cpd:C00147,cpd:C00178,cpd:C01234,cpd:C00360,cpd:C02946,cpd:C00455,cpd:C00231,cpd:C01179
map00190	Oxidative phosphorylation	0.12946424926691	2	7	27	292	Over	Adenosine 5'-Diphosphate, NADH	cpd:C00008,cpd:C00004
map00040	Pentose and glucuronate interconversions	0.162968421252362	2	8	27	292	Over	UDP-D-glucuronate, D-Xylulose 5-phosphate	cpd:C00167,cpd:C00231
map00591	Linoleic acid metabolism	0.176669961869792	1	2	27	292	Over	gamma-Linolenic acid	cpd:C06426
map04150	mTOR signaling pathway	0.176669961869792	1	2	27	292	Over	5'-Adenylic acid	cpd:C00020
map01040	Biosynthesis of unsaturated fatty acids	0.253324827488812	1	3	27	292	Over	gamma-Linolenic acid	cpd:C06426
map04020	Calcium signaling pathway	0.253324827488812	1	3	27	292	Over	NADH	cpd:C00004
map00130	Ubiquinone and other terpenoid-quinone biosynthesis	0.386544338155276	1	5	27	292	Over	4-Hydroxyphenylpyruvate	cpd:C01179
map00280	Valine, leucine and isoleucine degradation	0.386544338155276	1	5	27	292	Over	TPP	cpd:C00068
map00562	Inositol phosphate metabolism	0.386544338155276	1	5	27	292	Over	1D-chiro-Inositol	cpd:C19891
map00010	Glycolysis / Gluconeogenesis	0.444256194844501	1	6	27	292	Over	TPP	cpd:C00068
map00051	Fructose and mannose metabolism	0.444256194844501	1	6	27	292	Over	D-Mannose	cpd:C00159
map00730	Thiamine metabolism	0.444256194844501	1	6	27	292	Over	TPP	cpd:C00068
map00920	Sulfur metabolism	0.444256194844501	1	6	27	292	Over	APS	cpd:C00224
map01200	Carbon metabolism	0.457152703526508	3	23	27	292	Over	Sedoheptulose 7-phosphate, D-Gluconic acid, D-Xylulose 5-phosphate	cpd:C05382,cpd:C00257,cpd:C00231
map01230	Biosynthesis of amino acids	0.534841192740031	4	34	27	292	Over	Sedoheptulose 7-phosphate, L-Asparagine, D-Xylulose 5-phosphate, 4-Hydroxyphenylpyruvate	cpd:C05382,cpd:C00152,cpd:C00231,cpd:C01179
map00640	Propanoate metabolism	0.544400533086728	1	8	27	292	Over	TPP	cpd:C00068
map00020	Citrate cycle (TCA cycle)	0.58771456691299	1	9	27	292	Over	TPP	cpd:C00068
map00400	Phenylalanine, tyrosine and tryptophan biosynthesis	0.58771456691299	1	9	27	292	Over	4-Hydroxyphenylpyruvate	cpd:C01179
map00620	Pyruvate metabolism	0.58771456691299	1	9	27	292	Over	TPP	cpd:C00068
map00520	Amino sugar and nucleotide sugar metabolism	0.637557561393294	2	15	27	292	Over	D-Mannose, UDP-D-glucuronate	cpd:C00159,cpd:C00167
