# Supplementary material for: Association analysis of transcriptome and quasi-targeted metabolomics reveals the regulation mechanism underlying broiler muscle tissue development at different levels of dietary guanidinoacetic acid
Source: Frontiers journal article supplement (doi:10.3389/fvets.2024.1384028), 2024-04-25
Supplement: Data_Sheet_1.ZIP [file High_GAA.vs.Control_all_Pvalue.xls]

Pvalue	S-Methyl-L-cysteine	Pyridoxal 5'-phosphate hydrate	Adenine	Phe-Pro	dGDP	1D-chiro-Inositol	N-Acetyl-L-methionine	APS	Mag (18:1)	Adenosine 5'-Diphosphate	Sedoheptulose 7-phosphate	4-Acetamidobutanoate	gamma-Linolenic acid	D-Glucarate	3-Oxo-7alpha,12alpha-hydroxy-5beta-cholanoic acid	CDP	TPP	Nonadecanoic acid	Taurohyodeoxycholic acid sodium salt	Indoxylsulfuric acid	S-Lactoyglutathione	D-Gluconic acid	Phosphonotyrosine	Ectoine	1-Aminocyclopropane-1-carboxylic acid	Glyceraldehyde 3-phosphate diethyl acetal	Adipamide	beta-Nicotinamide mononucleotide	Thymine	D-Arabinose 5-phosphate	Furfural	D-Ribose 5-phophate	SDMA	NADH	5'-Adenylic acid	L-Asparagine	N-Methylnicotinamine	L(+)-Asparagine monohydrate	D-Xylulose 5-phosphate	Ribose 1-phosphate	5-Methyl-dl-tryptophan	Ribulose-5-phosphate	UDP-D-glucuronate	Cis-4,7,10,13,16,19-Docosahexaenoic Acid(C22:6N3)	4-Hydroxyphenylpyruvate	Adenylocuccinic Acid	D-Mannose	Pyridoxal 5-phosphate monohydrate	L-Leucyl-L-alanine Hydrate
S-Methyl-L-cysteine	0	0.000252882802208918	0.000139287644735444	0.00227423772064713	0.0854986677568338	0.000396883125468477	0.00192735238743264	0.0702312029650884	0.00204726147903828	0.0769016847909845	0.00216916818635146	0.0183970815251857	0.00727368922883492	0.00257380756878994	0.023646777095929	0.0140848598875757	0.0499573295040649	0.00475138523563649	0.0586158833911211	0.02529735741066	0.016857099576371	0.0278124241018166	0.039130664375055	0.0167470541644343	0.00688380202079758	0.00280291847500889	0.0476620289709972	0.0399171672286785	0.14414445461585	0.0201620678053582	0.0694551291421918	0.0201126600004294	0.0393207704122808	0.00113299167070918	0.0517819466785891	0.0359045306890434	0.0432265962592719	0.0259592508795014	0.0249148548112485	0.0260400105273549	0.0378187136625448	0.0264158064364796	0.106199356194789	0.0272732520116267	0.00639136928535491	1.24629827899812e-06	0.0300109383183324	0.012404618920522	0.179892190147137
Pyridoxal 5'-phosphate hydrate	0.000252882802208918	0	0.000430234116506383	0.00136643763042369	0.0476015323597433	0.00177273273958179	0.00348306722847342	0.0377732648151118	0.00407510739456851	0.0418826264440154	0.00559893054320125	0.00753538005932847	0.00212312443692087	0.00455248441140338	0.016620413978153	0.00572165861162293	0.0422737672305153	0.00844735671773597	0.0429051188345669	0.0499882823481061	0.0306320648990613	0.0218922201844607	0.0671039563978698	0.00811200622183372	0.0139768210561453	0.00827407658888455	0.0809932797265321	0.0155969419880907	0.117679634708268	0.0367216897199838	0.0347289799065136	0.0400265006745602	0.0661830537941933	0.00217570715619128	0.0914837882898253	0.050340011441016	0.0623779360481605	0.0497070002213704	0.042961345147437	0.0476747283662399	0.0185441421561315	0.0513435995833448	0.0687632699875548	0.0124109793785117	0.00563086814890006	0.000101354744157324	0.0141322935292934	0.00542519722591998	0.12092781641155
Adenine	0.000139287644735444	0.000430234116506383	0	0.0062682370651344	0.0646854734564317	0.00343621672813216	0.00495036538950738	0.051783225303628	0.00661850344742114	0.0572791552683948	0.00231604134407853	0.0199348292291692	0.00752296624377053	0.00154492360034528	0.0205397439246351	0.0118700042978139	0.071036379638597	0.00403365922449528	0.0732477537934375	0.0514945988060104	0.00813695529214285	0.0428094165280837	0.0824343131683613	0.00718785787645747	0.0143588834164786	0.00291791834866555	0.096231621694122	0.0424910393260257	0.156650274790352	0.0260225666629422	0.0953467336418037	0.0266135271410286	0.0648887957934689	0.000182430814491053	0.0916231921092379	0.0480217256257431	0.0651214342423015	0.0307744182462277	0.0319074698026866	0.0333797597788062	0.0434891896819451	0.0335485415264176	0.134752470890672	0.0160875183122243	0.00114727737618981	0.000232718001699191	0.0155379470050544	0.0142628142874573	0.203878101971448
Phe-Pro	0.00227423772064713	0.00136643763042369	0.0062682370651344	0	0.121123717672271	0.00058072676196731	0.000456449578223717	0.104483037919833	0.000741918137550181	0.111251737578832	0.0249586087726105	0.0272255342174096	0.00382515176554823	0.0235973889592007	0.0686762180011276	0.031891866059436	0.0474217807430881	0.00551109766828735	0.0815787743447123	0.0324862653605339	0.0532099422321331	0.00203583789855902	0.0483898796950373	0.0451544751519694	0.0171126593582494	0.00667085369898288	0.0369679742429862	0.0100323784637953	0.0513740548471625	0.033988696781069	0.034910713400743	0.0430059243286463	0.0569490321774489	0.014785586589383	0.0442549767882978	0.0233152206287641	0.0578841141457796	0.0470492437857525	0.0379682865439026	0.0456616685000664	0.00474534164441207	0.0586742982278301	0.0727676391879276	0.0165219692114751	0.0285760415283204	0.00140222944035821	0.0585871668766954	0.00165229674935327	0.137676446493367
dGDP	0.0854986677568338	0.0476015323597433	0.0646854734564317	0.121123717672271	0	0.14399400597364	0.141910770190366	8.95756420578675e-07	0.134263815893752	8.73518291309702e-08	0.0493637554894373	0.00434314756390009	0.0246437777408313	0.0336336381305437	0.00631346342946714	0.00308996444690667	0.278458917370202	0.201729102295442	0.0150715600528033	0.260848431630254	0.245816017187847	0.224077588275772	0.399244168604573	0.00397492125728033	0.26658528820552	0.181679698594762	0.439702382930554	0.0461125150737804	0.269041961419417	0.150520109195731	0.086108156024382	0.152473312151712	0.2002093220064	0.0447724978572472	0.64562239847907	0.233824877779082	0.141160242593523	0.191702827301077	0.158408504348177	0.16780555572467	0.149113552032882	0.161669288912801	0.0321280442945097	0.0877664378859204	0.0699231933874329	0.0791860686619452	0.00146631292960763	0.147382612304907	0.259005687768632
1D-chiro-Inositol	0.000396883125468477	0.00177273273958179	0.00343621672813216	0.00058072676196731	0.14399400597364	0	0.000534137391476556	0.12381265276845	0.000327805910197415	0.132667764182492	0.00887383367415437	0.030833398109209	0.0105111561428888	0.0116258573347286	0.0520800546490614	0.0323423762458656	0.0449816143312242	0.00616361184981244	0.0702086169499279	0.0109649165223952	0.037331458171216	0.0115392591474862	0.0172231851555669	0.0491008379428424	0.00607928280572749	0.00379544118362555	0.0157265927527221	0.038064289591267	0.107091581653502	0.018600241839865	0.0590405704328281	0.019956795487498	0.0260590888137507	0.00850570846616057	0.0219307092138064	0.0220851158834477	0.0327401290122764	0.0253737731870013	0.0221074321327617	0.0240873762182723	0.0282055486169338	0.0274673010084128	0.0949061854429957	0.0437942405379196	0.0267675563013651	0.000305972059996873	0.0713396935898694	0.011035137546045	0.180161880710186
N-Acetyl-L-methionine	0.00192735238743264	0.00348306722847342	0.00495036538950738	0.000456449578223717	0.141910770190366	0.000534137391476556	0	0.123083554776993	2.50487062813019e-05	0.130832756453845	0.0158412311807297	0.0402865072675626	0.00498198500189674	0.0140527304509327	0.0796607203984155	0.0434981190805859	0.103998766977426	0.00199971544665351	0.0987305545568965	0.0147264324850751	0.035292333098927	0.00341954010801347	0.0523334556182865	0.0481048521997244	0.0265802918095942	0.000995093143851245	0.0255562948809391	0.0208378564800936	0.0416746387304261	0.00885207497329286	0.091766976360425	0.0133327857607165	0.0272588703307636	0.00815705191004909	0.0409266775363887	0.00534834231079603	0.0288335007258653	0.012886789753732	0.0104037021073779	0.0136268730763985	0.014383764894157	0.0209312862970186	0.0967882733369051	0.0252158090483558	0.0287027937387483	0.00168699119166224	0.0654438359035172	0.0083964754912149	0.271821320606157
APS	0.0702312029650884	0.0377732648151118	0.051783225303628	0.104483037919833	8.95756420578675e-07	0.12381265276845	0.123083554776993	0	0.116736952837278	4.16198742310437e-08	0.0399178099391106	0.00319358877063947	0.019971545210056	0.0263793997022659	0.00466940863891114	0.0019421346070623	0.253113100690291	0.17580820429422	0.0142041826292797	0.238885582126264	0.215394392645904	0.20436536393058	0.36788270767626	0.00245743279247275	0.235094401237852	0.157630170656894	0.409088293034756	0.0417123060824127	0.258169753697691	0.135272530466971	0.0802958721051582	0.136880796513252	0.184922494445715	0.0352710477537126	0.598133004112009	0.214880678414228	0.130836883340509	0.173343170989004	0.143328713258091	0.15194276575248	0.135285034545369	0.146057206264337	0.0327108289989197	0.0760364012860046	0.0567918228750476	0.0648769423408508	0.000822174695589873	0.12910628085762	0.245685881787819
Mag (18:1)	0.00204726147903828	0.00407510739456851	0.00661850344742114	0.000741918137550181	0.134263815893752	0.000327805910197415	2.50487062813019e-05	0.116736952837278	0	0.124154145355643	0.0121149643101522	0.0322964803485104	0.00520836757798349	0.0120738631158664	0.06704214599101	0.037772626349593	0.10403023847029	0.00565833556319015	0.0720696368127017	0.00711749125247299	0.0508967589495161	0.0051112855434633	0.0365084881014027	0.0509381528848261	0.0269417395138834	0.00248023063601081	0.0156216999014992	0.023741604506532	0.0501127371167917	0.00616810762355308	0.0820849419410749	0.00889587127891594	0.0148719816162884	0.0091783897549219	0.0395301653155123	0.00489937944797979	0.0162041846149002	0.0103880092818816	0.00730948752880917	0.00952005964463035	0.0214422013465357	0.0144681459431729	0.0731714740897847	0.0411814254512525	0.0394842085560159	0.00176308458155424	0.0689236830942119	0.0146170163795051	0.276317180486411
Adenosine 5'-Diphosphate	0.0769016847909845	0.0418826264440154	0.0572791552683948	0.111251737578832	8.73518291309702e-08	0.132667764182492	0.130832756453845	4.16198742310437e-08	0.124154145355643	0	0.0443805999749004	0.00371265954160752	0.0216946081964874	0.0296623231102477	0.00553542121250006	0.00244932027124631	0.264838871543718	0.186224796421317	0.014890746925092	0.249496984690498	0.228272801994718	0.211620432961868	0.383663324884043	0.00304960879514596	0.249617337238662	0.167618019604632	0.423695096932406	0.0428746597066056	0.260419932632835	0.142009871178289	0.0827882251861308	0.144071474376539	0.192585935603428	0.0393448920471806	0.619871786047278	0.222433257789774	0.135995193629383	0.181476572065006	0.149971211079556	0.159113641177966	0.139801840837646	0.153435429800173	0.0324695074105322	0.0799350529058402	0.0621966068065364	0.0710856848531145	0.00104767510725256	0.135985314840603	0.251535372825503
Sedoheptulose 7-phosphate	0.00216916818635146	0.00559893054320125	0.00231604134407853	0.0249586087726105	0.0493637554894373	0.00887383367415437	0.0158412311807297	0.0399178099391106	0.0121149643101522	0.0443805999749004	0	0.0123439363144161	0.0160514706157764	5.1348791959852e-05	0.00603061920918559	0.00748272496547804	0.12406356569715	0.0305057765666938	0.0268966139015166	0.0231305882459337	0.0361088143450041	0.0981241483281201	0.0593589451848107	0.00977903238097579	0.0317514475785902	0.0145193681240302	0.0735370961914	0.0850559891225523	0.24247825550034	0.0124469001435935	0.125325759475051	0.00853557475188349	0.0206495550704659	0.000737076660340381	0.127417737736844	0.0519863986018461	0.020242144485933	0.0164060788112914	0.0159069266476936	0.0139479663724623	0.125635613855128	0.00931370784962418	0.0922379236400513	0.0822604258728352	0.0149213533817601	0.00291751424700411	0.0197567492317317	0.0723950813591729	0.310125612765515
4-Acetamidobutanoate	0.0183970815251857	0.00753538005932847	0.0199348292291692	0.0272255342174096	0.00434314756390009	0.030833398109209	0.0402865072675626	0.00319358877063947	0.0322964803485104	0.00371265954160752	0.0123439363144161	0	0.00458647011203402	0.010128417935072	0.00161479053955492	8.47326741752062e-05	0.107423671355143	0.09551097965888	0.00191056360553256	0.0844599428682564	0.166166215211362	0.0846773608495117	0.130490360905306	0.00517649047981016	0.0903547522994446	0.0787468937216904	0.158064475985762	0.0185381345746632	0.182477083963925	0.0664034874930803	0.0213595636730029	0.0659144848137492	0.0714323634777101	0.0166571078705835	0.290963481926099	0.111208269121881	0.0504698004257124	0.0971449729520652	0.0722566971652671	0.0776982988772915	0.0665886480585781	0.0748427928146655	0.00887779040906643	0.0633599571152693	0.045533318355302	0.0151177182213023	0.00523190495595921	0.0572129673146526	0.146250667396563
gamma-Linolenic acid	0.00727368922883492	0.00212312443692087	0.00752296624377053	0.00382515176554823	0.0246437777408313	0.0105111561428888	0.00498198500189674	0.019971545210056	0.00520836757798349	0.0216946081964874	0.0160514706157764	0.00458647011203402	0	0.00932581740070235	0.0257162443576307	0.00624541400330155	0.13407771772867	0.0199980535036323	0.0320868786192592	0.0569452342544348	0.0829613169548708	0.0134944905927195	0.141764471854137	0.00842084370506165	0.0784090893736886	0.0173452418456613	0.107884987966578	0.00178281876426637	0.0410354975616639	0.0244233975570185	0.0428442698769993	0.0330124085061496	0.0565384013167939	0.0070857171222645	0.188335168692077	0.0253387116876118	0.0397000640308659	0.0391469180568302	0.0268319961736793	0.0344689980922805	0.0107911913065804	0.0447170205711825	0.0252785903393009	0.012566551420606	0.0249667079288988	0.00545454418305098	0.00942469529079247	0.0122095329217367	0.211874609285391
D-Glucarate	0.00257380756878994	0.00455248441140338	0.00154492360034528	0.0235973889592007	0.0336336381305437	0.0116258573347286	0.0140527304509327	0.0263793997022659	0.0120738631158664	0.0296623231102477	5.1348791959852e-05	0.010128417935072	0.00932581740070235	0	0.00618124193333668	0.00543334586612137	0.152642985989039	0.0243951473407349	0.0302841321567586	0.0338802870638056	0.0311694021445604	0.087638589203416	0.0956420608874778	0.00419718756641896	0.0468441035627867	0.0117017770669216	0.100572993272131	0.0629379136262978	0.195568421423021	0.010794935616152	0.132185266794309	0.00867650252003621	0.0278984303746968	0.000139007126875636	0.164359879314683	0.0440655372384595	0.0235779218615251	0.0145661624956565	0.0138126778235805	0.0130745910247042	0.10345187655748	0.0100705988431216	0.0872938711873078	0.0562284172801314	0.00972081829943829	0.00327138235088935	0.00978946637792066	0.0621436741164864	0.331854210691769
3-Oxo-7alpha,12alpha-hydroxy-5beta-cholanoic acid	0.023646777095929	0.016620413978153	0.0205397439246351	0.0686762180011276	0.00631346342946714	0.0520800546490614	0.0796607203984155	0.00466940863891114	0.06704214599101	0.00553542121250006	0.00603061920918559	0.00161479053955492	0.0257162443576307	0.00618124193333668	0	0.000394575664595184	0.121595754238831	0.128794937274586	0.00434808405384423	0.109848150703435	0.135168924575592	0.197399936131699	0.140528614496181	0.00397416148898847	0.0855134265729744	0.100241868094425	0.21414952140152	0.0823967127029746	0.373008268157851	0.0864591573423577	0.0639891647438269	0.0736151967147772	0.0887246742066737	0.0142167959542121	0.332841842921909	0.186543408164577	0.0713670553216188	0.111746816554204	0.0960795050912239	0.093340709850569	0.170860739245176	0.0754881664929882	0.0447022229795176	0.112687125761068	0.0355629449620656	0.0227870444584487	0.00585645587250705	0.118804740666961	0.189931241759798
CDP	0.0140848598875757	0.00572165861162293	0.0118700042978139	0.031891866059436	0.00308996444690667	0.0323423762458656	0.0434981190805859	0.0019421346070623	0.037772626349593	0.00244932027124631	0.00748272496547804	8.47326741752062e-05	0.00624541400330155	0.00543334586612137	0.000394575664595184	0	0.103785068805437	0.0816509866092808	0.00501224975373022	0.101444280445475	0.117791652129717	0.106396248611743	0.146807057721938	0.00131859655265454	0.0781278858114973	0.0677184920358147	0.191067265001307	0.0281134428749175	0.223416725090441	0.069484194930313	0.03449461768399	0.0668127526135767	0.0872530294507308	0.00911869056012105	0.299244947381897	0.127735349801299	0.0656364822724653	0.0959789516119171	0.0771298960791506	0.0807683596738601	0.0795127706066126	0.0745053219642577	0.024532173675861	0.0522242281463452	0.0242663273316035	0.0121518816213538	0.00173876196570602	0.0572569400391122	0.151082002477082
TPP	0.0499573295040649	0.0422737672305153	0.071036379638597	0.0474217807430881	0.278458917370202	0.0449816143312242	0.103998766977426	0.253113100690291	0.10403023847029	0.264838871543718	0.12406356569715	0.107423671355143	0.13407771772867	0.152642985989039	0.121595754238831	0.103785068805437	0	0.119665042741119	0.169534823022317	0.204817925938724	0.155646416047653	0.124772451307443	0.0465152396249579	0.166141700760855	0.00693523520417305	0.147637407252785	0.14731885852935	0.154505299320249	0.466066419996367	0.342495738768129	0.0231223768078461	0.33268437970129	0.307105585021041	0.133645084695626	0.0661997269101465	0.361154685736511	0.347258093427248	0.383470776074472	0.367398708277539	0.371503939669505	0.099763741410483	0.363009436991327	0.239760155655984	0.128355642103786	0.0939753459002619	0.0445100729348409	0.199608607883466	0.0405283176415371	0.0074704395296653
Nonadecanoic acid	0.00475138523563649	0.00844735671773597	0.00403365922449528	0.00551109766828735	0.201729102295442	0.00616361184981244	0.00199971544665351	0.17580820429422	0.00565833556319015	0.186224796421317	0.0305057765666938	0.09551097965888	0.0199980535036323	0.0243951473407349	0.128794937274586	0.0816509866092808	0.119665042741119	0	0.225359923334951	0.0611090818478192	0.00507617318667794	0.0143518164542635	0.114149030312452	0.0538671667684385	0.027102381163988	0.000166790452564357	0.0820411360984329	0.0497105716772285	0.0710091044240125	0.0282698660035352	0.178976283892716	0.0371035956351342	0.0930304438696841	0.00891283244044196	0.0505497989985721	0.0209133450129018	0.101070791893913	0.0279791937772804	0.0326592529978438	0.0377043419952318	0.0227284287818564	0.0497168662546946	0.250370562121822	0.0112308615139731	0.0099278896766264	0.00534598148583932	0.0761067522924084	0.00748280401310702	0.307119156498087
Taurohyodeoxycholic acid sodium salt	0.0586158833911211	0.0429051188345669	0.0732477537934375	0.0815787743447123	0.0150715600528033	0.0702086169499279	0.0987305545568965	0.0142041826292797	0.0720696368127017	0.014890746925092	0.0268966139015166	0.00191056360553256	0.0320868786192592	0.0302841321567586	0.00434808405384423	0.00501224975373022	0.169534823022317	0.225359923334951	0	0.0777426872544359	0.331014426050689	0.175469122655385	0.116666136606139	0.0346390042099358	0.15371343329207	0.1741320240682	0.150272692190948	0.0700157436783337	0.304783172473894	0.0915842419319003	0.0386302867940417	0.0812339500612028	0.054683007197555	0.0583138343073711	0.360282272970209	0.167523024240943	0.0375035445268996	0.13081891386545	0.096096417157638	0.0966821303365738	0.17885693002418	0.0838751969282838	0.00456997468847115	0.210255745081157	0.145554187724697	0.0528885865816045	0.0346090458872091	0.170803702927736	0.218667521048632
Indoxylsulfuric acid	0.02529735741066	0.0499882823481061	0.0514945988060104	0.0324862653605339	0.260848431630254	0.0109649165223952	0.0147264324850751	0.238885582126264	0.00711749125247299	0.249496984690498	0.0231305882459337	0.0844599428682564	0.0569452342544348	0.0338802870638056	0.109848150703435	0.101444280445475	0.204817925938724	0.0611090818478192	0.0777426872544359	0	0.146404239566938	0.0557365237547146	0.0129468581972925	0.157334970551597	0.0618042935613641	0.0293284857758149	0.00151751022045063	0.13744482427533	0.155221451272941	0.00536764810947924	0.188064877721986	0.00390876476826671	0.000341847787791497	0.0466938683438217	0.0386660294404	0.0124633791103157	0.00213264629800245	0.00784762483344526	0.00561885902813993	0.00479041089107607	0.152450371731803	0.00466013636591818	0.102517298140299	0.23649338020925	0.159481643315375	0.026648286997666	0.198277378961654	0.129625661321676	0.498183888762499
S-Lactoyglutathione	0.016857099576371	0.0306320648990613	0.00813695529214285	0.0532099422321331	0.245816017187847	0.037331458171216	0.035292333098927	0.215394392645904	0.0508967589495161	0.228272801994718	0.0361088143450041	0.166166215211362	0.0829613169548708	0.0311694021445604	0.135168924575592	0.117791652129717	0.155646416047653	0.00507617318667794	0.331014426050689	0.146404239566938	0	0.118603581967823	0.187736886218338	0.0583259438204997	0.0348284558827795	0.00670364123851639	0.202316487010171	0.179924473263491	0.268782800067247	0.0758663998090094	0.340179261138859	0.077316323436978	0.186135037501935	0.012719199151431	0.101520694216781	0.10326202922267	0.207614636459106	0.0640651547001492	0.0870308696249098	0.0858749527073433	0.123764958452431	0.0866799360725256	0.480552570455595	0.0363665420248892	0.00373939345476816	0.0214792964687194	0.0888262898683482	0.0496110986422221	0.386323945206626
D-Gluconic acid	0.0278124241018166	0.0218922201844607	0.0428094165280837	0.00203583789855902	0.224077588275772	0.0115392591474862	0.00341954010801347	0.20436536393058	0.0051112855434633	0.211620432961868	0.0981241483281201	0.0846773608495117	0.0134944905927195	0.087638589203416	0.197399936131699	0.106396248611743	0.124772451307443	0.0143518164542635	0.175469122655385	0.0557365237547146	0.118603581967823	0	0.105958932090262	0.1257629907317	0.0737740665755954	0.0193853833931428	0.0482849068524904	0.00922807335097067	0.00962961033200777	0.0522173317852896	0.0708521329113402	0.0747771294576048	0.0894117364188926	0.0627246204291065	0.0643251963919284	0.0150421748137617	0.0865472137749953	0.0680719553814725	0.0534474682848748	0.0685129086639863	0.00163514488929711	0.100002703418602	0.0978274106565026	0.0270585948549125	0.0958180460529131	0.0230567609507413	0.138785015608042	0.00519419270742422	0.229551606607632
Phosphonotyrosine	0.039130664375055	0.0671039563978698	0.0824343131683613	0.0483898796950373	0.399244168604573	0.0172231851555669	0.0523334556182865	0.36788270767626	0.0365084881014027	0.383663324884043	0.0593589451848107	0.130490360905306	0.141764471854137	0.0956420608874778	0.140528614496181	0.146807057721938	0.0465152396249579	0.114149030312452	0.116666136606139	0.0129468581972925	0.187736886218338	0.105958932090262	0	0.255615207524969	0.0131478506215406	0.0865436683225193	0.0038046765886069	0.237142010925828	0.383048023551678	0.0953467278305476	0.11010466736741	0.0796361214371209	0.0371564358117639	0.111494859816003	0.008989617124985	0.124110774041931	0.064748658117947	0.108862174789057	0.102317511990358	0.0948266863346113	0.200176025295083	0.0842746261749447	0.183531362612502	0.316921848935081	0.195379923660947	0.0391326254937976	0.319330249231982	0.129893047677477	0.215508157459089
Ectoine	0.0167470541644343	0.00811200622183372	0.00718785787645747	0.0451544751519694	0.00397492125728033	0.0491008379428424	0.0481048521997244	0.00245743279247275	0.0509381528848261	0.00304960879514596	0.00977903238097579	0.00517649047981016	0.00842084370506165	0.00419718756641896	0.00397416148898847	0.00131859655265454	0.166141700760855	0.0538671667684385	0.0346390042099358	0.157334970551597	0.0583259438204997	0.1257629907317	0.255615207524969	0	0.104162950054695	0.0475946416144341	0.290585766887861	0.0366708472148554	0.211410977511492	0.0692109138689891	0.0971167156415795	0.0704198975773177	0.135408179998726	0.00377029017707595	0.363337867887459	0.126400816026141	0.105163290073172	0.0858501754460416	0.0776110927009454	0.0820404691229049	0.0841107037769692	0.0786329591020618	0.0796069961231532	0.0248197896594045	0.00649757486580045	0.0162315760337693	3.02330681517609e-05	0.0559293221687964	0.232880360860326
1-Aminocyclopropane-1-carboxylic acid	0.00688380202079758	0.0139768210561453	0.0143588834164786	0.0171126593582494	0.26658528820552	0.00607928280572749	0.0265802918095942	0.235094401237852	0.0269417395138834	0.249617337238662	0.0317514475785902	0.0903547522994446	0.0784090893736886	0.0468441035627867	0.0855134265729744	0.0781278858114973	0.00693523520417305	0.027102381163988	0.15371343329207	0.0618042935613641	0.0348284558827795	0.0737740665755954	0.0131478506215406	0.104162950054695	0	0.0289955695792348	0.0491718637676946	0.147486889432907	0.344912964059544	0.116349573755705	0.079531002776171	0.106947751340546	0.117154756352122	0.0363810207908663	0.0129995914322912	0.145689045496059	0.153394836112613	0.125146800248924	0.130990898331994	0.127575251211618	0.0924631375831434	0.119996938853058	0.257332666110278	0.0924223697400466	0.0328910894413739	0.00718948011800337	0.147390929243531	0.0288956204684651	0.0928321458636514
Glyceraldehyde 3-phosphate diethyl acetal	0.00280291847500889	0.00827407658888455	0.00291791834866555	0.00667085369898288	0.181679698594762	0.00379544118362555	0.000995093143851245	0.157630170656894	0.00248023063601081	0.167618019604632	0.0145193681240302	0.0787468937216904	0.0173452418456613	0.0117017770669216	0.100241868094425	0.0677184920358147	0.147637407252785	0.000166790452564357	0.1741320240682	0.0293284857758149	0.00670364123851639	0.0193853833931428	0.0865436683225193	0.0475946416144341	0.0289955695792348	0	0.0537323882352467	0.0592277828128605	0.0783025583982646	0.00926530246097152	0.197719460102358	0.0126052376816432	0.0452857503605071	0.00433462351824851	0.048077694415672	0.00985301466553446	0.0512555743728449	0.00881182841505367	0.0114893350086633	0.0132319668155232	0.0398599409797111	0.0184035570968684	0.212632202775984	0.0255021709375213	0.0131182554867615	0.0036433415887252	0.0705593926504783	0.0185251719657975	0.380181467020331
Adipamide	0.0476620289709972	0.0809932797265321	0.096231621694122	0.0369679742429862	0.439702382930554	0.0157265927527221	0.0255562948809391	0.409088293034756	0.0156216999014992	0.423695096932406	0.0735370961914	0.158064475985762	0.107884987966578	0.100572993272131	0.21414952140152	0.191067265001307	0.14731885852935	0.0820411360984329	0.150272692190948	0.00151751022045063	0.202316487010171	0.0482849068524904	0.0038046765886069	0.290585766887861	0.0491718637676946	0.0537323882352467	0	0.178321617781075	0.178324425927346	0.0351530958468403	0.172943234730004	0.0328673644863306	0.0104553866238596	0.112326696850219	0.010148952634853	0.0320387153628189	0.0231161985455101	0.0417395951587133	0.035854340643159	0.0348367848975758	0.148556204628027	0.0376825711287331	0.157698958355321	0.292082371140225	0.241451268960131	0.0475674925467571	0.349491712975419	0.125389976319651	0.408992019524952
beta-Nicotinamide mononucleotide	0.0399171672286785	0.0155969419880907	0.0424910393260257	0.0100323784637953	0.0461125150737804	0.038064289591267	0.0208378564800936	0.0417123060824127	0.023741604506532	0.0428746597066056	0.0850559891225523	0.0185381345746632	0.00178281876426637	0.0629379136262978	0.0823967127029746	0.0281134428749175	0.154505299320249	0.0497105716772285	0.0700157436783337	0.13744482427533	0.179924473263491	0.00922807335097067	0.237142010925828	0.0366708472148554	0.147486889432907	0.0592277828128605	0.178321617781075	0	0.0193893838795963	0.0880894507770859	0.028136300333166	0.11604641437832	0.146033324414769	0.0497768322654593	0.266081728792889	0.0562623543301147	0.110463328800015	0.12237783489403	0.0905828986541529	0.112698356459612	0.00215322695122288	0.145253537150816	0.0253570360545189	0.0120720962604494	0.0721699482248126	0.0316202283160718	0.031366290486482	0.0103772848661658	0.16475258984356
Thymine	0.14414445461585	0.117679634708268	0.156650274790352	0.0513740548471625	0.269041961419417	0.107091581653502	0.0416746387304261	0.258169753697691	0.0501127371167917	0.260419932632835	0.24247825550034	0.182477083963925	0.0410354975616639	0.195568421423021	0.373008268157851	0.223416725090441	0.466066419996367	0.0710091044240125	0.304783172473894	0.155221451272941	0.268782800067247	0.00962961033200777	0.383048023551678	0.211410977511492	0.344912964059544	0.0783025583982646	0.178324425927346	0.0193893838795963	0	0.0822089144499413	0.227252846904243	0.124850459584753	0.165843561214861	0.157828812786959	0.281354972549147	0.0196625332663229	0.134172692797626	0.0996623132478579	0.0774294820820281	0.102287965568192	0.0174572663900575	0.156383387009994	0.134729279655034	0.0630850371004184	0.23281384909067	0.132581620916671	0.202628739830857	0.0601835448726073	0.558183703891714
D-Arabinose 5-phosphate	0.0201620678053582	0.0367216897199838	0.0260225666629422	0.033988696781069	0.150520109195731	0.018600241839865	0.00885207497329286	0.135272530466971	0.00616810762355308	0.142009871178289	0.0124469001435935	0.0664034874930803	0.0244233975570185	0.010794935616152	0.0864591573423577	0.069484194930313	0.342495738768129	0.0282698660035352	0.0915842419319003	0.00536764810947924	0.0758663998090094	0.0522173317852896	0.0953467278305476	0.0692109138689891	0.116349573755705	0.00926530246097152	0.0351530958468403	0.0880894507770859	0.0822089144499413	0	0.271568119158768	2.44814368548766e-05	0.00280057465776412	0.0137824649533389	0.119756509476146	0.00176067071696987	0.00227372634921582	2.42568439034689e-05	3.71019256333938e-07	3.48990912359701e-06	0.119815898260698	0.000153480787739493	0.113314929349562	0.125079967229577	0.0813533065170249	0.0226259865554724	0.0899300402307826	0.110078846412228	0.656489734797133
Furfural	0.0694551291421918	0.0347289799065136	0.0953467336418037	0.034910713400743	0.086108156024382	0.0590405704328281	0.091766976360425	0.0802958721051582	0.0820849419410749	0.0827882251861308	0.125325759475051	0.0213595636730029	0.0428442698769993	0.132185266794309	0.0639891647438269	0.03449461768399	0.0231223768078461	0.178976283892716	0.0386302867940417	0.188064877721986	0.340179261138859	0.0708521329113402	0.11010466736741	0.0971167156415795	0.079531002776171	0.197719460102358	0.172943234730004	0.028136300333166	0.227252846904243	0.271568119158768	0	0.282656618088014	0.229166790103778	0.13504433533864	0.22247508685038	0.263010740552413	0.211147895775105	0.34488121253724	0.283708796430376	0.304764676111834	0.0413432662631296	0.31721374252184	0.0269243318218608	0.101027907873593	0.15030003339612	0.0556291269401634	0.095172408750709	0.0396026394377368	0.0139429811024236
D-Ribose 5-phophate	0.0201126600004294	0.0400265006745602	0.0266135271410286	0.0430059243286463	0.152473312151712	0.019956795487498	0.0133327857607165	0.136880796513252	0.00889587127891594	0.144071474376539	0.00853557475188349	0.0659144848137492	0.0330124085061496	0.00867650252003621	0.0736151967147772	0.0668127526135767	0.33268437970129	0.0371035956351342	0.0812339500612028	0.00390876476826671	0.077316323436978	0.0747771294576048	0.0796361214371209	0.0704198975773177	0.106947751340546	0.0126052376816432	0.0328673644863306	0.11604641437832	0.124850459584753	2.44814368548766e-05	0.282656618088014	0	0.0015378150794886	0.0135236303458563	0.117247027444193	0.00513355472153381	0.00158223566251705	6.51740236575487e-05	4.84054560494269e-05	5.43010061168833e-06	0.156722479208186	4.46480697308153e-06	0.120925166457236	0.155641802414609	0.0838075322439708	0.0232772058688869	0.0941549027450684	0.134359453328816	0.661086608404786
SDMA	0.0393207704122808	0.0661830537941933	0.0648887957934689	0.0569490321774489	0.2002093220064	0.0260590888137507	0.0272588703307636	0.184922494445715	0.0148719816162884	0.192585935603428	0.0206495550704659	0.0714323634777101	0.0565384013167939	0.0278984303746968	0.0887246742066737	0.0872530294507308	0.307105585021041	0.0930304438696841	0.054683007197555	0.000341847787791497	0.186135037501935	0.0894117364188926	0.0371564358117639	0.135408179998726	0.117154756352122	0.0452857503605071	0.0104553866238596	0.146033324414769	0.165843561214861	0.00280057465776412	0.229166790103778	0.0015378150794886	0	0.0466535411993302	0.100524631692658	0.0137626215434954	8.5675166272682e-05	0.00491889148098713	0.00269350932241323	0.00198288758320577	0.201017507035049	0.00146943513063948	0.0788943372970973	0.273891793477871	0.181117362839707	0.0414552041355265	0.166453512959005	0.187979031939206	0.616315715226006
NADH	0.00113299167070918	0.00217570715619128	0.000182430814491053	0.014785586589383	0.0447724978572472	0.00850570846616057	0.00815705191004909	0.0352710477537126	0.0091783897549219	0.0393448920471806	0.000737076660340381	0.0166571078705835	0.0070857171222645	0.000139007126875636	0.0142167959542121	0.00911869056012105	0.133645084695626	0.00891283244044196	0.0583138343073711	0.0466938683438217	0.012719199151431	0.0627246204291065	0.111494859816003	0.00377029017707595	0.0363810207908663	0.00433462351824851	0.112326696850219	0.0497768322654593	0.157828812786959	0.0137824649533389	0.13504433533864	0.0135236303458563	0.0466535411993302	0	0.141233480309264	0.0388826181712864	0.0421998899883185	0.0167259123625378	0.0175160614529695	0.0179479481436021	0.0686222144253429	0.0169510549646037	0.120010341591974	0.0265046313430204	0.00265317803448082	0.00159798136767733	0.00939498968174375	0.0342518220478509	0.303459243473536
5'-Adenylic acid	0.0517819466785891	0.0914837882898253	0.0916231921092379	0.0442549767882978	0.64562239847907	0.0219307092138064	0.0409266775363887	0.598133004112009	0.0395301653155123	0.619871786047278	0.127417737736844	0.290963481926099	0.188335168692077	0.164359879314683	0.332841842921909	0.299244947381897	0.0661997269101465	0.0505497989985721	0.360282272970209	0.0386660294404	0.101520694216781	0.0643251963919284	0.008989617124985	0.363337867887459	0.0129995914322912	0.048077694415672	0.010148952634853	0.266081728792889	0.281354972549147	0.119756509476146	0.22247508685038	0.117247027444193	0.100524631692658	0.141233480309264	0	0.0993278445146391	0.154893572194244	0.118145166181566	0.127455834184074	0.125058386760299	0.144771016282497	0.131451704401201	0.411280587192255	0.232784313631387	0.177209222403875	0.0536829873559407	0.447446989314163	0.0827165320674944	0.286190692230778
L-Asparagine	0.0359045306890434	0.050340011441016	0.0480217256257431	0.0233152206287641	0.233824877779082	0.0220851158834477	0.00534834231079603	0.214880678414228	0.00489937944797979	0.222433257789774	0.0519863986018461	0.111208269121881	0.0253387116876118	0.0440655372384595	0.186543408164577	0.127735349801299	0.361154685736511	0.0209133450129018	0.167523024240943	0.0124633791103157	0.10326202922267	0.0150421748137617	0.124110774041931	0.126400816026141	0.145689045496059	0.00985301466553446	0.0320387153628189	0.0562623543301147	0.0196625332663229	0.00176067071696987	0.263010740552413	0.00513355472153381	0.0137626215434954	0.0388826181712864	0.0993278445146391	0	0.0123050069095821	0.00253092568019455	0.00145246469885055	0.00289607676570554	0.0593091161767388	0.00874994556876076	0.128381284909443	0.0964384520302069	0.121253031118488	0.0364737845456309	0.14774859060966	0.0728043060961107	0.645824384783555
N-Methylnicotinamine	0.0432265962592719	0.0623779360481605	0.0651214342423015	0.0578841141457796	0.141160242593523	0.0327401290122764	0.0288335007258653	0.130836883340509	0.0162041846149002	0.135995193629383	0.020242144485933	0.0504698004257124	0.0397000640308659	0.0235779218615251	0.0713670553216188	0.0656364822724653	0.347258093427248	0.101070791893913	0.0375035445268996	0.00213264629800245	0.207614636459106	0.0865472137749953	0.064748658117947	0.105163290073172	0.153394836112613	0.0512555743728449	0.0231161985455101	0.110463328800015	0.134172692797626	0.00227372634921582	0.211147895775105	0.00158223566251705	8.5675166272682e-05	0.0421998899883185	0.154893572194244	0.0123050069095821	0	0.00512828244909785	0.00203594019388582	0.00179115930465056	0.181535624277545	0.00163623063292325	0.0496302622766219	0.245451340955426	0.176491332390713	0.0442973100378245	0.124983242877367	0.185171623859887	0.624351799966009
L(+)-Asparagine monohydrate	0.0259592508795014	0.0497070002213704	0.0307744182462277	0.0470492437857525	0.191702827301077	0.0253737731870013	0.012886789753732	0.173343170989004	0.0103880092818816	0.181476572065006	0.0164060788112914	0.0971449729520652	0.0391469180568302	0.0145661624956565	0.111746816554204	0.0959789516119171	0.383470776074472	0.0279791937772804	0.13081891386545	0.00784762483344526	0.0640651547001492	0.0680719553814725	0.108862174789057	0.0858501754460416	0.125146800248924	0.00881182841505367	0.0417395951587133	0.12237783489403	0.0996623132478579	2.42568439034689e-05	0.34488121253724	6.51740236575487e-05	0.00491889148098713	0.0167259123625378	0.118145166181566	0.00253092568019455	0.00512828244909785	0	3.3251664888978e-05	1.67018996089127e-05	0.149173578511025	0.000167336487699071	0.166292682990161	0.141442548629309	0.0847108365504523	0.0300953434057052	0.112154892210052	0.131057416534708	0.735654095572313
D-Xylulose 5-phosphate	0.0249148548112485	0.042961345147437	0.0319074698026866	0.0379682865439026	0.158408504348177	0.0221074321327617	0.0104037021073779	0.143328713258091	0.00730948752880917	0.149971211079556	0.0159069266476936	0.0722566971652671	0.0268319961736793	0.0138126778235805	0.0960795050912239	0.0771298960791506	0.367398708277539	0.0326592529978438	0.096096417157638	0.00561885902813993	0.0870308696249098	0.0534474682848748	0.102317511990358	0.0776110927009454	0.130990898331994	0.0114893350086633	0.035854340643159	0.0905828986541529	0.0774294820820281	3.71019256333938e-07	0.283708796430376	4.84054560494269e-05	0.00269350932241323	0.0175160614529695	0.127455834184074	0.00145246469885055	0.00203594019388582	3.3251664888978e-05	0	3.80070566394689e-06	0.124462718634783	0.000204333851172745	0.11279401018664	0.13473104410298	0.0936814106704918	0.0275319217147406	0.0984927136910582	0.1191549868442	0.685358188086747
Ribose 1-phosphate	0.0260400105273549	0.0476747283662399	0.0333797597788062	0.0456616685000664	0.16780555572467	0.0240873762182723	0.0136268730763985	0.15194276575248	0.00952005964463035	0.159113641177966	0.0139479663724623	0.0776982988772915	0.0344689980922805	0.0130745910247042	0.093340709850569	0.0807683596738601	0.371503939669505	0.0377043419952318	0.0966821303365738	0.00479041089107607	0.0858749527073433	0.0685129086639863	0.0948266863346113	0.0820404691229049	0.127575251211618	0.0132319668155232	0.0348367848975758	0.112698356459612	0.102287965568192	3.48990912359701e-06	0.304764676111834	5.43010061168833e-06	0.00198288758320577	0.0179479481436021	0.125058386760299	0.00289607676570554	0.00179115930465056	1.67018996089127e-05	3.80070566394689e-06	0	0.151042042000851	3.71631436536873e-05	0.125825267021285	0.156346994675359	0.0966616155438396	0.0294249781964371	0.105830195058226	0.137792165953541	0.706641417485227
5-Methyl-dl-tryptophan	0.0378187136625448	0.0185441421561315	0.0434891896819451	0.00474534164441207	0.149113552032882	0.0282055486169338	0.014383764894157	0.135285034545369	0.0214422013465357	0.139801840837646	0.125635613855128	0.0665886480585781	0.0107911913065804	0.10345187655748	0.170860739245176	0.0795127706066126	0.099763741410483	0.0227284287818564	0.17885693002418	0.152450371731803	0.123764958452431	0.00163514488929711	0.200176025295083	0.0841107037769692	0.0924631375831434	0.0398599409797111	0.148556204628027	0.00215322695122288	0.0174572663900575	0.119815898260698	0.0413432662631296	0.156722479208186	0.201017507035049	0.0686222144253429	0.144771016282497	0.0593091161767388	0.181535624277545	0.149173578511025	0.124462718634783	0.151042042000851	0	0.196291024829213	0.0984691629339627	0.00605298063571388	0.0671052215786421	0.0303552831594925	0.0853710080808934	0.000993869972130711	0.130885985008859
Ribulose-5-phosphate	0.0264158064364796	0.0513435995833448	0.0335485415264176	0.0586742982278301	0.161669288912801	0.0274673010084128	0.0209312862970186	0.146057206264337	0.0144681459431729	0.153435429800173	0.00931370784962418	0.0748427928146655	0.0447170205711825	0.0100705988431216	0.0754881664929882	0.0745053219642577	0.363009436991327	0.0497168662546946	0.0838751969282838	0.00466013636591818	0.0866799360725256	0.100002703418602	0.0842746261749447	0.0786329591020618	0.119996938853058	0.0184035570968684	0.0376825711287331	0.145253537150816	0.156383387009994	0.000153480787739493	0.31721374252184	4.46480697308153e-06	0.00146943513063948	0.0169510549646037	0.131451704401201	0.00874994556876076	0.00163623063292325	0.000167336487699071	0.000204333851172745	3.71631436536873e-05	0.196291024829213	0	0.134350609604639	0.188785800267762	0.096048582599126	0.0306861910095559	0.104536495756277	0.167441088071532	0.708671907438834
UDP-D-glucuronate	0.106199356194789	0.0687632699875548	0.134752470890672	0.0727676391879276	0.0321280442945097	0.0949061854429957	0.0967882733369051	0.0327108289989197	0.0731714740897847	0.0324695074105322	0.0922379236400513	0.00887779040906643	0.0252785903393009	0.0872938711873078	0.0447022229795176	0.024532173675861	0.239760155655984	0.250370562121822	0.00456997468847115	0.102517298140299	0.480552570455595	0.0978274106565026	0.183531362612502	0.0796069961231532	0.257332666110278	0.212632202775984	0.157698958355321	0.0253570360545189	0.134729279655034	0.113314929349562	0.0269243318218608	0.120925166457236	0.0788943372970973	0.120010341591974	0.411280587192255	0.128381284909443	0.0496302622766219	0.166292682990161	0.11279401018664	0.125825267021285	0.0984691629339627	0.134350609604639	0	0.189178454155321	0.245935662978627	0.0918269997858612	0.0683387327445	0.143516339524108	0.238432317708603
Cis-4,7,10,13,16,19-Docosahexaenoic Acid(C22:6N3)	0.0272732520116267	0.0124109793785117	0.0160875183122243	0.0165219692114751	0.0877664378859204	0.0437942405379196	0.0252158090483558	0.0760364012860046	0.0411814254512525	0.0799350529058402	0.0822604258728352	0.0633599571152693	0.012566551420606	0.0562284172801314	0.112687125761068	0.0522242281463452	0.128355642103786	0.0112308615139731	0.210255745081157	0.23649338020925	0.0363665420248892	0.0270585948549125	0.316921848935081	0.0248197896594045	0.0924223697400466	0.0255021709375213	0.292082371140225	0.0120720962604494	0.0630850371004184	0.125079967229577	0.101027907873593	0.155641802414609	0.273891793477871	0.0265046313430204	0.232784313631387	0.0964384520302069	0.245451340955426	0.141442548629309	0.13473104410298	0.156346994675359	0.00605298063571388	0.188785800267762	0.189178454155321	0	0.00982987431812503	0.0242197727453423	0.0266462360330115	0.00298071217908745	0.171803056168804
4-Hydroxyphenylpyruvate	0.00639136928535491	0.00563086814890006	0.00114727737618981	0.0285760415283204	0.0699231933874329	0.0267675563013651	0.0287027937387483	0.0567918228750476	0.0394842085560159	0.0621966068065364	0.0149213533817601	0.045533318355302	0.0249667079288988	0.00972081829943829	0.0355629449620656	0.0242663273316035	0.0939753459002619	0.0099278896766264	0.145554187724697	0.159481643315375	0.00373939345476816	0.0958180460529131	0.195379923660947	0.00649757486580045	0.0328910894413739	0.0131182554867615	0.241451268960131	0.0721699482248126	0.23281384909067	0.0813533065170249	0.15030003339612	0.0838075322439708	0.181117362839707	0.00265317803448082	0.177209222403875	0.121253031118488	0.176491332390713	0.0847108365504523	0.0936814106704918	0.0966616155438396	0.0671052215786421	0.096048582599126	0.245935662978627	0.00982987431812503	0	0.00734894672016852	0.0132554887527477	0.0227504258517663	0.205835543312108
Adenylocuccinic Acid	1.24629827899812e-06	0.000101354744157324	0.000232718001699191	0.00140222944035821	0.0791860686619452	0.000305972059996873	0.00168699119166224	0.0648769423408508	0.00176308458155424	0.0710856848531145	0.00291751424700411	0.0151177182213023	0.00545454418305098	0.00327138235088935	0.0227870444584487	0.0121518816213538	0.0445100729348409	0.00534598148583932	0.0528885865816045	0.026648286997666	0.0214792964687194	0.0230567609507413	0.0391326254937976	0.0162315760337693	0.00718948011800337	0.0036433415887252	0.0475674925467571	0.0316202283160718	0.132581620916671	0.0226259865554724	0.0556291269401634	0.0232772058688869	0.0414552041355265	0.00159798136767733	0.0536829873559407	0.0364737845456309	0.0442973100378245	0.0300953434057052	0.0275319217147406	0.0294249781964371	0.0303552831594925	0.0306861910095559	0.0918269997858612	0.0242197727453423	0.00734894672016852	0	0.0282744459990797	0.00955302852985585	0.159882153536954
D-Mannose	0.0300109383183324	0.0141322935292934	0.0155379470050544	0.0585871668766954	0.00146631292960763	0.0713396935898694	0.0654438359035172	0.000822174695589873	0.0689236830942119	0.00104767510725256	0.0197567492317317	0.00523190495595921	0.00942469529079247	0.00978946637792066	0.00585645587250705	0.00173876196570602	0.199608607883466	0.0761067522924084	0.0346090458872091	0.198277378961654	0.0888262898683482	0.138785015608042	0.319330249231982	3.02330681517609e-05	0.147390929243531	0.0705593926504783	0.349491712975419	0.031366290486482	0.202628739830857	0.0899300402307826	0.095172408750709	0.0941549027450684	0.166453512959005	0.00939498968174375	0.447446989314163	0.14774859060966	0.124983242877367	0.112154892210052	0.0984927136910582	0.105830195058226	0.0853710080808934	0.104536495756277	0.0683387327445	0.0266462360330115	0.0132554887527477	0.0282744459990797	0	0.0660770150063138	0.238412813537423
Pyridoxal 5-phosphate monohydrate	0.012404618920522	0.00542519722591998	0.0142628142874573	0.00165229674935327	0.147382612304907	0.011035137546045	0.0083964754912149	0.12910628085762	0.0146170163795051	0.135985314840603	0.0723950813591729	0.0572129673146526	0.0122095329217367	0.0621436741164864	0.118804740666961	0.0572569400391122	0.0405283176415371	0.00748280401310702	0.170803702927736	0.129625661321676	0.0496110986422221	0.00519419270742422	0.129893047677477	0.0559293221687964	0.0288956204684651	0.0185251719657975	0.125389976319651	0.0103772848661658	0.0601835448726073	0.110078846412228	0.0396026394377368	0.134359453328816	0.187979031939206	0.0342518220478509	0.0827165320674944	0.0728043060961107	0.185171623859887	0.131057416534708	0.1191549868442	0.137792165953541	0.000993869972130711	0.167441088071532	0.143516339524108	0.00298071217908745	0.0227504258517663	0.00955302852985585	0.0660770150063138	0	0.0868777429637702
L-Leucyl-L-alanine Hydrate	0.179892190147137	0.12092781641155	0.203878101971448	0.137676446493367	0.259005687768632	0.180161880710186	0.271821320606157	0.245685881787819	0.276317180486411	0.251535372825503	0.310125612765515	0.146250667396563	0.211874609285391	0.331854210691769	0.189931241759798	0.151082002477082	0.0074704395296653	0.307119156498087	0.218667521048632	0.498183888762499	0.386323945206626	0.229551606607632	0.215508157459089	0.232880360860326	0.0928321458636514	0.380181467020331	0.408992019524952	0.16475258984356	0.558183703891714	0.656489734797133	0.0139429811024236	0.661086608404786	0.616315715226006	0.303459243473536	0.286190692230778	0.645824384783555	0.624351799966009	0.735654095572313	0.685358188086747	0.706641417485227	0.130885985008859	0.708671907438834	0.238432317708603	0.171803056168804	0.205835543312108	0.159882153536954	0.238412813537423	0.0868777429637702	0
Methyl beta-D-galactopyranoside	0.00925208073647622	0.00363927469416095	0.0042470873989787	0.00885427334649365	0.0808964853155184	0.0207094980532554	0.0149681200235576	0.0677110831760114	0.0254050989735937	0.0726260524356033	0.0421219636803582	0.0445578424912984	0.0102490224072953	0.0290936874209281	0.0704238188349518	0.0325906478685919	0.0756594742818407	0.00526225129413593	0.163385476298371	0.172083939772657	0.0166479812431933	0.028775305627605	0.210790318460395	0.0152451265194364	0.0415980248656404	0.0132066000874413	0.219346213369242	0.0186578533420519	0.0993321898798279	0.0969882774295975	0.0827227624842183	0.115125961980969	0.210877472182947	0.0110409211535763	0.159143394764975	0.0898337357896879	0.197447202710175	0.109723543111556	0.107677741213423	0.121617984735927	0.0102749389164794	0.140452354850518	0.182065540311216	0.000227602817584399	0.00225684344273264	0.00816825972273816	0.0204345242443375	0.00185770432854149	0.138195361934673
Val-Ser	0.0584334507987128	0.0468906573577779	0.0800552110339976	0.00872849735131845	0.362617313631433	0.0299309936713125	0.0186550801329988	0.335630614317459	0.0266078374640108	0.34548466858125	0.193531820501953	0.168967047559375	0.0495770228320966	0.18249599409236	0.320878121663491	0.194561138915486	0.0904809248684536	0.0254837688027228	0.315266477292573	0.132510976572486	0.139649105134789	0.00115699556306562	0.137188748499895	0.21556612176172	0.0731631927813557	0.0451941815215503	0.0875564119695085	0.0274569925730982	0.0283408894286937	0.148367596238535	0.0803608039257702	0.187766350792728	0.211509640624576	0.129222154589387	0.0562467898700128	0.0621478797190588	0.219930708303354	0.171019416292599	0.152612202283199	0.17890668899231	0.00227907992140916	0.231232307007494	0.200639404181909	0.0327640070238772	0.128112162706019	0.0503839562777563	0.234501189340904	0.00428542707193756	0.161485051657019
dAMP	0.0858288250433541	0.0820507667338266	0.138031645237919	0.0819439536695124	0.125648378153053	0.0611944297226724	0.100130186739615	0.120368607177426	0.0653850166193123	0.123826242439313	0.0655661983352614	0.0281602457102674	0.0766641849601083	0.08741405543452	0.0508177326706302	0.0509379603708212	0.14310762233845	0.269894550089805	0.00611938155567389	0.0331973631175837	0.455403054374746	0.14352837763909	0.0346044939668199	0.157552430246502	0.130944820133901	0.207784222567557	0.0456768640792168	0.11893259413603	0.307011814858418	0.103806245847101	0.0406640408172826	0.0915977743873097	0.0305551626604116	0.135197497040924	0.196276681056249	0.149933727322615	0.0280452512094472	0.14545650553252	0.105728387481234	0.105049835514535	0.203787087761893	0.0951563713489838	0.0106089473946624	0.353590832595296	0.292862163776563	0.0776738085332109	0.169732212755904	0.204350421288362	0.23022742809709
L-Alanyl-L-leucine	0.0495876743166531	0.0234123172408992	0.0583232319566553	0.00793072003034364	0.157761578718068	0.0377277193100078	0.0275854065249495	0.144251184484798	0.0364501595928549	0.14867563590962	0.154981096286714	0.0697210014750845	0.0188912849041034	0.134684135479846	0.176419803017104	0.0842959433369909	0.0674738427201437	0.0405579191468926	0.180226319806947	0.19489227464565	0.159353564686583	0.00507557816161635	0.199805610366952	0.0998939075052257	0.0881659433716524	0.0675976739045057	0.174476144905976	0.00387084864910029	0.0373686240513787	0.181229768756527	0.0231495092816104	0.22277765745428	0.258106071417747	0.0952070547792728	0.155613095402878	0.105641170752517	0.238342915812598	0.222021987619492	0.188419743761986	0.220310629030083	9.96344798800054e-05	0.269983859092908	0.100079794701142	0.0100213864119628	0.0818251839234935	0.0395855060289236	0.0996661524948766	0.00127200906458135	0.0748057600380574
3-OH-anthranilate	0.0334549591425201	0.0407190883436027	0.0347552135766411	0.022741547302643	0.185412869243023	0.0285280968192661	0.00562294211558194	0.168672989363609	0.00772241159228987	0.174868684528469	0.0532614634123599	0.1048321629765	0.0168357930424737	0.0378152282430666	0.176495986854823	0.111087968125653	0.376623800764652	0.0111924002844114	0.19386713530264	0.0379772274539901	0.0679733932613047	0.0148853593595957	0.200333972760092	0.0851434980410542	0.160619691638941	0.00613670973100133	0.0790671148356605	0.0389508673887976	0.0126439161957771	0.00435614370978062	0.274682325663578	0.010844294215384	0.0384012169968501	0.0266624191106668	0.145574647687379	0.000382829932647782	0.0313599495085481	0.00510734028772215	0.00414605796044213	0.0072180892658587	0.0408634154328461	0.0169537526997676	0.151338490934851	0.0475502676698822	0.076096181461617	0.0340596070686128	0.098616028517982	0.0516850961351261	0.628288373298995
[truncated: 5 more columns]
