# Supplementary material for: Association analysis of transcriptome and quasi-targeted metabolomics reveals the regulation mechanism underlying broiler muscle tissue development at different levels of dietary guanidinoacetic acid
Source: Frontiers journal article supplement (doi:10.3389/fvets.2024.1384028), 2024-04-25
Supplement: Data_Sheet_1.ZIP [file High_GAA.vs.Control_all_zscore.xls]

Compound_ID	all_High_GAA_1	all_High_GAA_2	all_High_GAA_3	all_NC_1	all_NC_2	all_NC_3
S-Methyl-L-cysteine	-6.81148370981345	-7.3119555093703	-7.51530302556105	-0.166165850608947	1.07267459997062	-0.906508749361677
Pyridoxal 5'-phosphate hydrate	-8.0707424649718	-7.06518578977581	-8.38621122581761	0.663798850946376	0.486347672970612	-1.15014652391699
Adenine	-3.87239861454494	-4.10428098211912	-4.27874661695797	0.252929015586487	0.849250709268496	-1.10217972485498
Phe-Pro	14.5142584147193	11.5419616861584	18.1816153013437	1.11605931520631	-0.814561729098949	-0.301497586107358
dGDP	-1.41826565264909	-1.41732303609235	-1.40625753738288	1.15453451812918	-0.560310406875532	-0.59422411125365
1D-chiro-Inositol	7.12418513557356	7.52469298816968	8.58057732683221	1.11656734663163	-0.81315230678608	-0.303415039845553
N-Acetyl-L-methionine	7.03318340098293	7.85300232502388	11.3997978806116	0.880226634233446	-1.08733878346485	0.207112149231399
APS	-1.5243929048483	-1.52286694539997	-1.50582165368996	1.15339807237719	-0.529215723567859	-0.62418234880933
Mag (18:1)	9.41538950334006	11.5081738065825	15.2186932153988	1.14696563040688	-0.689035322744433	-0.45793030766245
Adenosine 5'-Diphosphate	-1.47408162134103	-1.46612139319045	-1.46475259244398	1.15397507375716	-0.541545374693287	-0.612429699063873
Sedoheptulose 7-phosphate	4.86297971090144	7.6053422570736	5.64344320315409	-0.761369584185305	-0.371137838058981	1.13250742224429
4-Acetamidobutanoate	-2.85024869158278	-2.83525067171916	-2.78650710716238	1.10922855241382	-0.832479376358863	-0.276749176054957
gamma-Linolenic acid	-4.1279770915206	-3.89844261952961	-6.01890393220833	1.1513157642723	-0.499146391472481	-0.652169372799812
D-Glucarate	3.29318093829604	5.07537297549155	4.24723482777298	-0.832981060863117	-0.276046049239521	1.10902711010264
3-Oxo-7alpha,12alpha-hydroxy-5beta-cholanoic acid	-2.76777609143494	-3.30788809825475	-2.0827443581604	1.15363729611997	-0.533914781675359	-0.619722514444613
CDP	-2.91909587085895	-2.94430845064401	-2.6492062287719	1.15453803248973	-0.560492584828949	-0.594045447660784
TPP	7.59409469639315	3.64215960486941	3.25291292006817	1.14989958135034	-0.483855254023768	-0.666044327326572
Nonadecanoic acid	-2.42691003220656	-2.36634143375324	-3.74595950963456	-0.428146283246794	1.14279165124107	-0.714645367994274
Taurohyodeoxycholic acid sodium salt	-1.96133945044172	-2.53356956494692	-1.80794733111867	0.898854215538263	-1.07715780194206	0.178303586403793
Indoxylsulfuric acid	2.15438863719665	5.02848418134816	4.49547948456568	0.918024231584992	0.147554972555601	-1.06557920414059
S-Lactoyglutathione	-1.43894956102091	-1.61975082229306	-1.71180384356649	-0.213907359403222	1.08964525450769	-0.87573789510447
D-Gluconic acid	6.28770489325217	4.12882395548423	10.8376969891854	1.08402773249676	-0.197539039325647	-0.886488693171115
Phosphonotyrosine	-2.19926429251268	-2.76806968501132	-1.84026416773894	-1.01794407673937	0.036910185988641	0.981033890750729
Ectoine	-2.06375428722216	-2.13464143185283	-2.14176406360998	1.01356180480698	-0.0276991235000233	-0.985862681306958
1-Aminocyclopropane-1-carboxylic acid	4.03749480143752	3.38172335279639	2.7645266952518	1.03348294479471	-0.962762494451064	-0.0707204503436512
Glyceraldehyde 3-phosphate diethyl acetal	2.4753355695277	3.26273936765167	4.29425322795395	0.440588892712087	-1.14463803545809	0.704049142746003
Adipamide	-1.40510088507463	-2.43224104473262	-2.40001703972374	-0.994244821211431	-0.0114126684406446	1.00565748965208
beta-Nicotinamide mononucleotide	3.75169364359571	2.04632041610087	5.44177204393813	-1.10536990399469	0.841852777847789	0.263517126146905
Thymine	5.4887740825216	3.73859343394789	22.2900365620237	-0.762578711164261	1.13219233330914	-0.36961362214488
D-Arabinose 5-phosphate	6.36726029708221	19.9034006834331	21.3505052964064	-0.0590266355291712	-0.96917927368865	1.02820590921782
