# Supplementary material for: Association analysis of transcriptome and quasi-targeted metabolomics reveals the regulation mechanism underlying broiler muscle tissue development at different levels of dietary guanidinoacetic acid
Source: Frontiers journal article supplement (doi:10.3389/fvets.2024.1384028), 2024-04-25
Supplement: Data_Sheet_1.ZIP [file High_GAA.vs.No_GAA_all.xls]

Compound_ID	Name	Chinese name	RT [min]	Formula	Molecular Weight	Class(English)	Class(Chinese)	CAS	all_High_GAA_1	all_High_GAA_2	all_High_GAA_3	all_No_GAA_1	all_No_GAA_2	all_No_GAA_3	FC	log2FC	Pvalue	ROC	VIP
Com_100_neg	alpha-Benzylsuccinic acid	¦Á-ÜÐ»ù¶¡¶þËá	0.71	C11H12O4	208.211	Organic Acid And Its Derivatives	ÓÐ»úËá¼°ÆäÑÜÉúÎï	"884-33-3"	234100	210300	225300	177100	195300	211100	1.14772922022279	0.198782312117	0.0930486812891674	0.888888888888889	1.69315450571517
Com_101_neg	6-Sialyllactose	6'-ÍÙÒºÈéÌÇ	0.73	C23H39NO19	633.551	Carbohydrates And Its Derivatives	ÌÇÀà¼°ÆäÑÜÉúÎï	"35890-39-2"	48080	22720	25550	33840	39870	28300	0.944515243603568	-0.0823540143205	0.71020761931136	0.666666666666667	0.545722280332778
Com_102_neg	2-Hydroxyisocaproic Acid	2-ôÇ»ù-4-¼×»ùÎìËá	6.39	C6H12O3	132.158	Fatty Acyls	Ö¬·¾õ£Àà	"498-36-2"	9470	10280	12330	14400	17680	20280	0.612681436210848	-0.70679095549	0.0203421926507632	1	1.63062250879621
Com_103_neg	Trehalose 6-phosphate	º£ÔåÌÇ-6-Á×Ëá	0.96	C12H23O14P	422.276	Carbohydrates And Its Derivatives	ÌÇÀà¼°ÆäÑÜÉúÎï	"4484-88-2"	268200	41590	102700	309000	156700	120200	0.704027991124765	-0.506295305437	0.437619138849889	0.777777777777778	0.778798080851185
Com_104_neg	Citicoline	°û¶þÁ×µ¨¼î	0.89	C14H26N4O11P2	488.324	Pyrimidines and pyrimidine derivatives	à×à¤¼°ÆäÑÜÉúÎï	"987-78-0"	33880	27360	54570	25230	81250	36290	0.811164810534426	-0.30193302732	0.768228189880276	0.555555555555556	0.565376317649244
Com_105_neg	Homotaurine	3-°±»ù±ûÍé»ÇËá	0.84	C3H9NO3S	139.17	Organic Acid And Its Derivatives	ÓÐ»úËá¼°ÆäÑÜÉúÎï	"3687-18-1"	8745	26130	22770	16820	12030	11040	1.44509902231136	0.531168353697	0.50781528460751	0.666666666666667	0.728303625232375
Com_106_neg	Allitol	ËâÌÇ´¼	0.91	C6H14O6	182.172	Sugar Alcohols	ÌÇ´¼	"488-44-8"	10750	5669	14720	25170	28750	15640	0.447656699252444	-1.15953531829	0.0755041729122096	1	1.8502527993186
Com_107_neg	scyllo-Inositol	ÇàÐ·¼¡´¼	0.853	C6H12O6	180.16	Carbohydrates And Its Derivatives	ÌÇÀà¼°ÆäÑÜÉúÎï	"488-59-5"	416600	700700	602900	468900	353500	444800	1.35748106060606	0.440932069882	0.19590316406835	0.777777777777778	1.33068772575191
Com_108_neg	Succinic acid	çúçêËá	1.936	C4H6O4	118.09	Tca Cycle	ÈýôÈËáÑ­»·	"110-15-6"	6605000	12530000	2105000	18290000	19800000	12320000	0.421344971235866	-1.24692618821	0.16664068223318	0.888888888888889	1.70485079442774
Com_109_neg	Thymidine	ÐØÜÕ	4.289	C10H14N2O5	242.23	Nucleotide And Its Derivates	ºËÜÕËá¼°ÆäÑÜÉúÎï	"50-89-5"	10880	5713	12270	10570	12050	7837	0.947663919624388	-0.0775525837142	0.76056728090739	0.555555555555556	0.40094680192934
Com_10_neg	5'-Adenylic acid	5'-ÏÙàÑßÊºËÜÕËá	1.036	C10H14N5O7P	347.221	Nucleotide And Its Derivates	ºËÜÕËá¼°ÆäÑÜÉúÎï	"61-19-8"	857200	700600	446700	564100	6475000	6450000	0.148601463403785	-2.75047977151	0.203206836110892	0.777777777777778	1.43919745251533
Com_110_neg	Cytosine	°ûà×à¤	0.875	C4H5N3O	111.1	Nucleotide And Its Derivates	ºËÜÕËá¼°ÆäÑÜÉúÎï	"71-30-7"	40650	83290	42680	56440	74300	53300	0.905346663768746	-0.143457778563	0.609194746723131	0.666666666666667	0.708600582011181
Com_111_neg	Xanthurenic Acid	»ÆÄòËá	4.977	C10H7NO4	205.17	Organic Acid And Its Derivatives	ÓÐ»úËá¼°ÆäÑÜÉúÎï	"59-00-7"	329800	239100	293500	266800	307600	234000	1.06679861454725	0.0932878563728	0.639761658089994	0.666666666666667	0.319577714976549
Com_112_neg	cis-Aconitic acid	Ë³Ê½ÎÚÍ·Ëá	1.766	C6H6O6	174.11	Tca Cycle	ÈýôÈËáÑ­»·	"585-84-2"	35140	45060	22040	53570	28540	30160	0.91066179745257	-0.135012731013	0.765325488845382	0.444444444444444	0.453617624059105
Com_113_neg	Riboflavin-5-phosphate	2,6-Ýì¶þ·Ó	5.52	C17H21N4O9P	456.344	Nucleotide And Its Derivates	ºËÜÕËá¼°ÆäÑÜÉúÎï	"146-17-8"	10170	8541	6682	13100	8250	6439	0.913778833351326	-0.130083070346	0.817087733496145	0.555555555555556	0.573538645564281
Com_114_neg	D-Glucopyranose	¦Â-D-ÆÏÌÑÌÇ	0.87	C6H12O6	180.156	Carbohydrates And Its Derivatives	ÌÇÀà¼°ÆäÑÜÉúÎï	"28905-12-6"	166600	184000	149800	158400	166800	174200	1.00200240288346	0.00288596823761	0.99146518754666	0.555555555555556	0.0911621904858809
Com_115_neg	Prostaglandin I2	Ç°ÁÐÏÙËØI2	9.35	C20H32O5	352.465	Hormones	¼¤ËØ	"35121-78-9"	14950	25490	5831	5153	23080	7577	1.29212510471935	0.369745759831	0.654413555596005	0.666666666666667	0.435882985113042
Com_116_neg	Pyruvic Acid	±ûÍªËá	1.78	C3H4O3	88.062	Tca Cycle	ÈýôÈËáÑ­»·	"127-17-3"	21510	23260	21550	23460	30080	17590	0.932377337269788	-0.101014156707	0.791979406987217	0.666666666666667	0.274579804109832
Com_117_neg	Pyrophosphate	½¹Á×Ëá	0.97	H4O7P2	177.975	Others	ÆäËü	"2466-09-3"	61590000	84620000	82290000	43660000	51300000	69940000	1.38568829593693	0.470602766508	0.128304348363257	0.888888888888889	1.23180378032343
Com_118_neg	Prostaglandin G2	Ç°ÁÐÏÙËØG2	2.69	C20H32O6	368.465	Hormones	¼¤ËØ	"51982-36-6"	322200	460600	190100	70480	382700	319700	1.25879826104958	0.332047090758	0.556025885041447	0.666666666666667	0.837286954371251
Com_119_neg	Phosphopyruvic acid	Á×Ï©´¼±ûÍªËá	1.03	C3H5O6P	168.042	Organic Acid And Its Derivatives	ÓÐ»úËá¼°ÆäÑÜÉúÎï		1155000	125700	66030	1198000	189300	188000	0.854903827842316	-0.22616596132	0.666784654692154	0.777777777777778	0.870215449023858
Com_11_neg	UMP	ÄòÜÕ-5-µ¥Á×Ëá	1.037	C9H13N2O9P	324.181	Nucleotide And Its Derivates	ºËÜÕËá¼°ÆäÑÜÉúÎï	"58-97-9"	16240000	17290000	20140000	467000	18830000	9057000	1.89285462368625	0.920563612446	0.335510778179816	0.777777777777778	1.27869723769686
Com_120_neg	1-Dodecanol	Ê®¶þ´¼	6.18	C12H26O	186.33	Fatty Acyls	Ö¬·¾õ£Àà	"112-53-8"	34160	75620	95580	36150	28510	31350	2.13894386001458	1.09689861717	0.155966836627733	0.888888888888889	1.72726390793641
Com_121_neg	Succinic anhydride	¶¡¶þËáôû	1.02	C4H4O3	100.07	Organic Acid And Its Derivatives	ÓÐ»úËá¼°ÆäÑÜÉúÎï	"108-30-5"	502100	560700	653400	549900	515800	538200	1.0700168339672	0.0976334939068	0.50427146897381	0.666666666666667	0.270950884031241
Com_122_neg	Hydantoin-5-propionic acid	ÒÒÄÚõ£ëå-5-±ûËá	2.18	C6H8N2O4	172.14	Organoheterocyclic compounds	ÓÐ»úÔÓ»·»¯ºÏÎï	"5624-26-0"	2395000	750400	1350000	2416000	2734000	557400	0.787644111153941	-0.344384184815	0.832780089932428	0.666666666666667	0.407784599755119
Com_123_neg	Indoleacetaldehyde	ßÅßáÒÒÈ©	6.92	C10H9NO	159.18	Organoheterocyclic compounds	ÓÐ»úÔÓ»·»¯ºÏÎï	"2591-98-2"	6423	2295	2611	3725	3746	3177	1.06395567242675	0.0894380451039	0.898385927706966	0.666666666666667	0.410902535999888
Com_124_neg	Dimethylmalonic acid	¶þ¼×»ù±û¶þËá	0.68	C5H8O4	132.11	Organic Acid And Its Derivatives	ÓÐ»úËá¼°ÆäÑÜÉúÎï	"595-46-0"	734600	1054000	1042000	1272000	1108000	800300	0.890041819954092	-0.168054970019	0.572050713815945	0.777777777777778	0.600040129685782
Com_125_neg	Glucotropaeolin	½ðÁ«ÆÏÌÇÁòÜÕ	0.98	C14H19NO9S2	409.4	Carbohydrates And Its Derivatives	ÌÇÀà¼°ÆäÑÜÉúÎï	"499-26-3"	101600	71160	70150	122500	76390	106700	0.794888576196865	-0.331175450634	0.29125776932115	0.888888888888889	1.15947726155216
Com_126_neg	Diflunisal	¶þ·úÄáÁø	13.67	C13H8F2O3	250.2	Benzene and substituted derivatives	±½¼°ÆäÈ¡´úÑÜÉúÎï	"22494-42-4"	232000	221200	238800	221300	224700	225300	1.03083569194101	0.0438143954484	0.310911380665092	0.666666666666667	1.29083142397248
Com_127_neg	Hexadecanedioate	Ê®ÁùÍé¶þËá	11.86	C16H30O4	286.41	Fatty Acyls	Ö¬·¾õ£Àà	"505-54-4"	50200	85250	62490	67550	69940	38060	1.12754201082313	0.173181187518	0.626291004853663	0.444444444444444	0.583351055099284
Com_128_neg	Hydroxyhydroquinone	Æ«±½Èý·Ó	0.92	C6H6O3	126.11	Phenols And Its Derivatives	·ÓÀà¼°ÆäÑÜÉúÎï	"533-73-3"	118100	149500	144100	98020	137200	158600	1.0454014524402	0.0640570688363	0.738194244778949	0.555555555555556	0.634215698390219
Com_129_neg	3-Phosphoglyceric acid	3-Á×Ëá¸ÊÓÍËá	1.03	C3H8NaO6P	194.056	Carbohydrates And Its Derivatives	ÌÇÀà¼°ÆäÑÜÉúÎï	"17603-42-8"	3733000	110100	103400	2011000	802800	213900	1.30346467615682	0.382351486422	0.640002361297372	0.666666666666667	0.804717966099423
Com_12_neg	L-Threonine	L-ËÕ°±Ëá	0.888	C4H9NO3	119.12	Amino Acid And Its Derivatives	°±»ùËá¼°ÆäÑÜÉúÎï	"72-19-5"	73580	31210	84930	94510	129100	116100	0.558476347472844	-0.840431913742	0.160677766320571	1	1.48282627946045
Com_130_neg	5,6-Dihydroxyindole-2-Carboxylic Acid	5,6-¶þôÇ»ùßÅßá-2-ôÈËá	18.52	C9H7NO4	193.156	Indole And Its Derivatives	ßÅßá¼°ÆäÑÜÉúÎï	"4790-08-3"	96510	103700	102400	101000	122000	111800	0.903853046594982	-0.145839864484	0.204936135252246	0.777777777777778	1.36696438913962
Com_131_neg	4-Pyridoxic acid	4-ßÁà¤Ëá	2.94	C8H9NO4	183.161	Pyridine And Its Derivatives	ßÁà¤¼°ÆäÑÜÉúÎï	"82-82-6"	108500	312900	525400	332900	269200	130400	1.29255972696246	0.370230946538	0.810838463163069	0.555555555555556	0.250919812075127
Com_132_neg	ARCAR	5-°±»ùßäßò-4-¼×õ£°·-1-¦Â-D-ß»à«ºËÌÇÜÕ5-Ò»Á×ËáÑÎ	1.06	C9H15N4O8P	338.211	Nucleotide And Its Derivates	ºËÜÕËá¼°ÆäÑÜÉúÎï	"3031-94-5"	714200	1219000	1242000	945770	993400	855000	1.1363660765093	0.184427669074	0.643723425489307	0.666666666666667	0.560725341561099
Com_133_neg	APS	5'-ÏÙÜÕËáÁòËá(APS)	1.05	C10H14N5O10PS	427.284	Nucleotide And Its Derivates	ºËÜÕËá¼°ÆäÑÜÉúÎï	"485-84-7"	399300	418100	628100	16340000	4135000	6475000	0.0536363636363636	-4.22064475905	0.0127882037602369	1	1.83940905228837
Com_134_neg	5-Phosphoribosyl 1-pyrophosphate	5-Á×ËáºËÌÇ»ù-1-½¹Á×Ëá	1.01	C5H13O14P3	196.25	Carbohydrates And Its Derivatives	ÌÇÀà¼°ÆäÑÜÉúÎï	"97-55-2"	19880	41650	28330	275800	22550	215200	0.174978093661766	-2.51475377937	0.228065837787693	0.777777777777778	1.55222072433317
Com_135_neg	2-Phenylbutyric acid	2-±½»ù¶¡Ëá	1.83	C10H12O2	164.2	Benzene and substituted derivatives	±½¼°ÆäÈ¡´úÑÜÉúÎï	"90-27-7"	441200	336900	389300	218600	361500	220100	1.45888527868033	0.544866439537	0.122635300230004	0.888888888888889	0.95080014398047
Com_136_neg	Galactaric acid	Õ³Ëá	0.9	C6H10O8	210.14	Sugar Acids And Its Derivatives	ÌÇËá¼°ÆäÑÜÉúÎï	"526-99-8"	83750	54630	88550	78020	46380	37090	1.4052263298037	0.490802513783	0.249480481454688	0.888888888888889	1.52336787656726
Com_137_neg	6-keto PGE1	6-ÍªPGE1	0.9	C20H32O6	368.5	Eicosanoid	Ñõ»¯Ö¬ÖÊ	"67786-53-2"	49180	95520	18650	38360	14160	66720	1.36992619926199	0.454098174334	0.67713689284747	0.666666666666667	0.467154828048932
Com_138_neg	Pimelic acid	¸ý¶þËá	5.77	C7H12O4	160.17	Fatty Acyls	Ö¬·¾õ£Àà	"111-16-0"	361200	226800	268100	412300	303600	267900	0.870197194551738	-0.200585729138	0.492460833420719	0.666666666666667	0.874357072384708
Com_139_neg	Palmitaldehyde	×ØéµÈ©	10.19	C16H32O	240.42	Fatty Acyls	Ö¬·¾õ£Àà	"629-80-1"	934400	980600	1165000	900800	997000	1024000	1.05414470531864	0.0760729232522	0.564235184230078	0.444444444444444	0.646291470031623
Com_13_neg	Deoxyguanosine	ÍÑÑõÄñÜÕ	3.181	C10H13N5O4	267.241	Nucleotide And Its Derivates	ºËÜÕËá¼°ÆäÑÜÉúÎï	"961-07-9"	64240	57580	121800	62540	79800	37990	1.35096767038208	0.433993150358	0.418250537210676	0.666666666666667	1.06088758597609
Com_140_neg	Ribulose-5-phosphate	ºËÍªÌÇ-5-Á×Ëá	0.93	C5H11O8P	230.02	Carbohydrates And Its Derivatives	ÌÇÀà¼°ÆäÑÜÉúÎï		4064000	9363000	8373000	2057000	5445000	3776000	1.93296683809186	0.950816886938	0.156627728025579	0.888888888888889	1.29676837328858
Com_141_neg	Taurocholic acid	Å£»Çµ¨Ëá	8.09	C26H45NO7S	515.7	Bile Acids	µ¨Ö­Ëá	"81-24-3"	42160	24260	10680	12600	41450	20250	1.03768506056528	0.0533686493764	0.984713228625428	0.555555555555556	0.032507081126697
Com_142_neg	Cytidine 5'-Monophosphate-N-Acetylneuraminic Acid	CMP-ÍÙÒºËáµ¥ÄÆÑÎ	1.11	C20H30N4NaO16P	636.433	Pyrimidines and pyrimidine derivatives	à×à¤¼°ÆäÑÜÉúÎï	"3063-71-6"	47320	25890	35380	35010	91920	47350	0.623077805829699	-0.682515766187	0.290957117829359	0.777777777777778	0.791569828765205
Com_143_neg	Dl-2-Amino-3-phosphonopropionic acid	DL-2-°±»ù-3-Á×±ûËá	18.32	C3H8NO5P	169.073	Amino Acid And Its Derivatives	°±»ùËá¼°ÆäÑÜÉúÎï	"20263-06-3"	60510	58010	58810	50690	54270	52890	1.12340829901806	0.167882365772	0.0119407464354631	1	2.04948451583912
Com_144_neg	D-Mannose	D-¸ÊÂ¶ÌÇ	1.41	C6H12O6	180.156	Carbohydrates And Its Derivatives	ÌÇÀà¼°ÆäÑÜÉúÎï	"3458-28-4"	60730	62660	56750	212200	65730	59550	0.533779779542491	-0.905683440038	0.385937171775319	0.777777777777778	1.05969936181558
Com_145_neg	dTMP	¶þÁ×ËáÍÑÑõÐØÜÕ	2.14	C10H15N2O8P	322.208	Nucleotide And Its Derivates	ºËÜÕËá¼°ÆäÑÜÉúÎï	"365-07-1"	64140	65420	66930	21940	76190	41710	1.40510583524027	0.49067880107	0.325452520996969	0.666666666666667	1.13253562281792
Com_146_neg	N-acetyl-L-ornithine	N-ÒÒõ£-L-Äñ°±Ëá	0.896	C7H14N2O3	174.198	Amino Acid And Its Derivatives	°±»ùËá¼°ÆäÑÜÉúÎï	"6205-08-9"	283300	273800	200300	162600	225400	270700	1.14984059511158	0.201433871098	0.468919939121591	0.777777777777778	0.652193970709115
Com_147_neg	Aminomalonic acid	°±»ù±û¶þËá	0.88	C3H5NO4	119.08	Organic Acid And Its Derivatives	ÓÐ»úËá¼°ÆäÑÜÉúÎï	"1068-84-4"	86360	50260	84950	111000	147300	120000	0.585699180544541	-0.771768218922	0.0699376468396254	1	1.41099666768734
Com_148_neg	TPP	½¹Á×ËáÁò°·ËØ	0.915	C12H19ClN4O7P2S	460.77	Co-Enzyme Factor	¸¨Ã¸Òò×Ó	"154-87-0"	219400	146300	139100	66950	142300	59030	1.88161622185776	0.911972403155	0.111719218273662	0.888888888888889	1.67215444920624
Com_149_neg	Homoarginine	¸ß¾«°±Ëá	0.807	C7H16N4O2	188.23	Amino Acid And Its Derivatives	°±»ùËá¼°ÆäÑÜÉúÎï	"156-86-5"	239400	257000	123600	149800	234200	177700	1.10379205981841	0.142468412583	0.819438220243833	0.666666666666667	0.196203313141373
Com_14_neg	Trehalose	º£ÔåÌÇ	0.962	C12H22O11	342.296	Carbohydrates And Its Derivatives	ÌÇÀà¼°ÆäÑÜÉúÎï	"99-20-7"	144200	109600	59370	159200	69480	86760	0.992803702764393	-0.0104195987283	0.984403694678532	0.444444444444444	0.585841428266813
Com_150_neg	Creatine phosphate disodium salt	Á×Ëá¼¡Ëá	0.93	C4H8N3Na2O5P	255.08	Organic Acid And Its Derivatives	ÓÐ»úËá¼°ÆäÑÜÉúÎï	"922-32-7"	2451000	1061000	124200	1208000	81540	120800	2.57824354410993	1.36638854891	0.419241425458648	0.777777777777778	1.10631822624368
Com_151_neg	Tetradecanedioic acid	Ê®ËÄÍé¶þËá	10.673	C14H26O4	258.35	Fatty Acyls	Ö¬·¾õ£Àà	"821-38-5"	72560	73790	75480	72340	74120	67940	1.03465485074627	0.0491495810947	0.316417146576797	0.777777777777778	1.11730472920093
Com_152_neg	Taurine	Å£»ÇËá	0.865	C2H7NO3S	125.15	Organic Acid And Its Derivatives	ÓÐ»úËá¼°ÆäÑÜÉúÎï	"107-35-7"	16940000	49380000	48050000	23800000	14990000	27930000	1.71417865707434	0.777517479487	0.326681676670824	0.777777777777778	1.06203526883434
Com_153_neg	N-Acetyl-DL-phenylalanine	N-ÒÒõ£-DL-±½±û°±Ëá	6.85	C11H13NO3	207.226	Amino Acid And Its Derivatives	°±»ùËá¼°ÆäÑÜÉúÎï	"2901-75-9"	81580	53720	71620	64520	98430	76610	0.863750208715979	-0.211313940775	0.448336160676613	0.666666666666667	0.662278791320463
Com_154_neg	Sulfoacetic acid	»Ç»ùÒÒËá	0.95	C2H4O5S	140.115	Organic Acid And Its Derivatives	ÓÐ»úËá¼°ÆäÑÜÉúÎï	"123-43-3"	89630	92260	132500	103400	85930	70240	1.21119543861001	0.276431677224	0.327913326761065	0.777777777777778	0.91810451236911
Com_155_neg	Thymidine 5'-diphosphate	ÐØÜÕ-5¡¯-¶þÁ×Ëá	0.69	C10H16N2O11P2	402.188	Nucleotide And Its Derivates	ºËÜÕËá¼°ÆäÑÜÉúÎï		56030	58440	55140	36720	53330	49480	1.21558087866409	0.281645886263	0.208146601078397	1	1.26595566829839
Com_156_neg	UDP-N-Acetyl-Alpha-D-Mannosamine	¶þÁ×ËáÄòÜÕ-N-ÒÒõ£°±»ùÆÏÌÑÌÇ	0.96	C17H27N3O17P2	607.354	Nucleotide And Its Derivates	ºËÜÕËá¼°ÆäÑÜÉúÎï	"26575-17-7"	15440000	14990000	11970000	15560000	22040000	13190000	0.834810001968892	-0.260480209166	0.409577565623753	0.777777777777778	0.611999253052424
Com_157_neg	Uric Acid	ÄòËá	1.14	C5H4N4O3	168.11	Organic Acid And Its Derivatives	ÓÐ»úËá¼°ÆäÑÜÉúÎï	"69-93-2"	1012000	798500	1237000	595300	972200	671400	1.36115949796775	0.444836128888	0.182148994570099	0.888888888888889	0.794964098170197
Com_158_neg	Ribose 1-phosphate	ºËÌÇ1-Á×Ëá	0.9	C5H11O8P	230.11	Carbohydrates And Its Derivatives	ÌÇÀà¼°ÆäÑÜÉúÎï	"14075-00-4"	7396000	17310000	17390000	2895000	10000000	6080000	2.21849802371541	1.14958326798	0.142867684260437	0.888888888888889	1.41944216260488
Com_159_neg	Sedoheptulose 7-phosphate	7-Á×Ëá¾°Ìì¸ýÌÇ	0.87	C7H13BaO10P	425.473	Carbohydrates And Its Derivatives	ÌÇÀà¼°ÆäÑÜÉúÎï	"2646-35-7"	279800	356400	301600	178400	152300	225900	1.68487243981315	0.752639370389	0.0240076261004981	1	1.5787363957838
Com_15_neg	L-Asparagine	L-Ìì¶¬ÃÅõ£°·	0.843	C4H8N2O3	132.12	Amino Acid And Its Derivatives	°±»ùËá¼°ÆäÑÜÉúÎï	"70-47-3"	236400	402800	566700	360400	154400	320600	1.44350011970314	0.52957122721	0.372307544028491	0.777777777777778	0.712000066435106
Com_160_neg	Sedoheptulose 1,7-bisphosphate	1,7-¶þÁ×Ëá»¯¾°Ìì¸ýÍªÌÇ	0.88	C7H16O13P2	370.142	Organic Acid And Its Derivatives	ÓÐ»úËá¼°ÆäÑÜÉúÎï	"815-91-8"	374839	197300	122700	129500	93080	115300	2.05646679294424	1.04016777593	0.185782580637777	0.888888888888889	0.542054363873006
Com_161_neg	dGDP	¶þÁ×ËáÍÑÑõÄñÜÕ	1.08	C10H15N5O10P2	427.201	Nucleotide And Its Derivates	ºËÜÕËá¼°ÆäÑÜÉúÎï	"3493-09-2"	129300	138500	246500	12590000	3574000	5237000	0.0240315873090043	-5.37892424679	0.002963412580832	1	1.97681070741648
Com_162_neg	D-Galactonic acid	D-°ëÈéÌÇËá	0.92	C6H12O7	196.155	Organic Acid And Its Derivatives	ÓÐ»úËá¼°ÆäÑÜÉúÎï	"13382-27-9"	80590	50890	108200	40410	61090	59180	1.49166044311675	0.576919162413	0.236813073444387	0.777777777777778	1.25543479983508
Com_163_neg	D-Gluconic acid	D-ÆÏÌÑÌÇËá	0.91	C6H12O7	196.155	Sugar Acids And Its Derivatives	ÌÇËá¼°ÆäÑÜÉúÎï	"526-95-4"	172600	147500	225500	82210	144900	109600	1.6203854949363	0.696337075747	0.078652184965352	1	1.67125504698427
Com_164_neg	D-Glucarate	ÆÏÌÑÌÇ¶þËá	0.82	C6H10O8	210.139	Carbohydrates And Its Derivatives	ÌÇÀà¼°ÆäÑÜÉúÎï	"87-73-0"	26030	29710	28000	19380	27190	22680	1.20924187725632	0.274102846916	0.169837553315529	0.888888888888889	1.16677971349076
Com_165_neg	UDP	ÄòÜÕ¶þÁ×Ëá	0.7	C9H14N2O12P2	404.16	Nucleotide And Its Derivates	ºËÜÕËá¼°ÆäÑÜÉúÎï	"58-98-0"	1824000	944500	874300	1216000	1262000	1033000	1.03753916263173	0.0531657930073	0.949411350734815	0.666666666666667	0.450111989541685
Com_166_neg	D-Erythrose 4-phosphate	D-³àÞºÌÇ-4-Á×Ëá	0.95	C4H9O7P	200.084	Carbohydrates And Its Derivatives	ÌÇÀà¼°ÆäÑÜÉúÎï	"585-18-2"	17350000	4678000	3290000	19620000	31800000	11720000	0.400981944884384	-1.31839081734	0.149308003263941	0.888888888888889	0.807493817973048
Com_167_neg	D-Fructose 1,6-bisphosphate	D-¹ûÌÇ-1,6-¶þÁ×Ëá	0.86	C6H14O12P2	340.116	Sugar Acids And Its Derivatives	ÌÇËá¼°ÆäÑÜÉúÎï	"488-69-7"	1647000	404900	262600	7981000	1428000	693300	0.229106243132752	-2.12591132235	0.24095403908828	0.777777777777778	1.47365442290661
Com_168_neg	dATP	ÍÑÑõÈýÁ×ËáÏÙÜÕ	0.73	C10H16N5O12P3	491.001	Nucleotide And Its Derivates	ºËÜÕËá¼°ÆäÑÜÉúÎï	"1927-31-7"	18510	8401	13110	12120	21190	16700	0.800259948010398	-0.321459388901	0.431276164129558	0.666666666666667	0.969896019839678
Com_169_neg	1,3 bisphosphoglycerate	1,3-¸ÊÓÍ¶þõ¥	12.04	C3H8O10P2	266.04	Glycerolipids	¸ÊÓÍÖ¬Àà		65230	47450	58900	83680	66840	79630	0.745513795350858	-0.423693045799	0.0679550297410742	1	1.32479909276238
Com_16_neg	15-Hete	15-ôÇ¶þÊ®ÍéËÄÏ©Ëá	13.08	C20H32O3	320.5	Eicosanoid	Ñõ»¯Ö¬ÖÊ	"54845-95-3"	10140	6778	8441	3389	7704	5750	1.50561063943478	0.590348728055	0.193556830880122	0.888888888888889	1.25189416256708
Com_170_neg	Octanedioic acid	ÐÁ¶þËá	6.649	C8H14O4	174.19	Organic Acid And Its Derivatives	ÓÐ»úËá¼°ÆäÑÜÉúÎï	"505-48-6"	89560	105500	78810	90900	99560	95740	0.956918238993711	-0.0635324316571	0.617205263164756	0.666666666666667	0.719901225073638
Com_171_neg	N-Acetyl-D-glucosamine	N-ÒÒõ£-D-°±»ùÆÏÌÑÌÇ	0.984	C8H15NO6	221.208	Carbohydrates And Its Derivatives	ÌÇÀà¼°ÆäÑÜÉúÎï	"7512-17-6"	4428	4355	4963	4741	4915	4908	0.943834111507827	-0.0833947814187	0.282678402997014	0.666666666666667	0.491457696555249
Com_172_neg	2-Hydroxybutyric acid	2-ôÇ»ù¶¡Ëá	2.741	C4H8O3	104.1	Organic Acid And Its Derivatives	ÓÐ»úËá¼°ÆäÑÜÉúÎï	"600-15-7"	535500	468600	480000	639200	982800	298700	0.772687041182902	-0.372043892324	0.713395260517872	0.666666666666667	0.503104643971357
Com_173_neg	N-Acetyl-L-methionine	N-ÒÒõ£-L-µ°°±Ëá	5.315	C7H13NO3S	191.25	Amino Acid And Its Derivatives	°±»ùËá¼°ÆäÑÜÉúÎï	"65-82-7"	22220	23170	27280	16720	19390	15430	1.40997283663174	0.495667369125	0.0200047925722542	1	1.52148543734998
Com_174_neg	(R)-3-Hydroxyisobutyric acid	(R)-3-ôÇ»ùÒì¶¡Ëá	2.37	C4H8O3	104.104	Organic Acid And Its Derivatives	ÓÐ»úËá¼°ÆäÑÜÉúÎï	"1910-47-0"	768600	507900	399500	805600	871500	322700	0.838083808380838	-0.254833574245	0.75806022105519	0.666666666666667	0.462723767642047
Com_175_neg	2-Hydroxybutanoic acid	(S)-2-ôÇ»ù¶¡Ëá	2.64	C4H8O3	104.104	Organic Acid And Its Derivatives	ÓÐ»úËá¼°ÆäÑÜÉúÎï	"3347-90-8"	410300	314100	373500	513800	693500	242300	0.757381346578367	-0.400908205128	0.601146334689265	0.666666666666667	0.705746615796432
Com_176_neg	N-Acetyl-L-tyrosine	N-ÒÒõ£-L-ÀÒ°±Ëá	5.17	C11H13NO4	223.23	Amino Acid And Its Derivatives	°±»ùËá¼°ÆäÑÜÉúÎï	"537-55-3"	26770	19250	15750	19810	15730	8128	1.41453696070349	0.500329873678	0.292117272022955	0.777777777777778	1.09344106598853
Com_177_neg	Itaconic acid	ÒÂ¿µËá	1.45	C5H6O4	130.1	Fatty Acyls	Ö¬·¾õ£Àà	"97-65-4"	88060	97230	92210	96060	112300	44190	1.0987923183528	0.135918729694	0.619405219017363	0.555555555555556	0.686937973191849
Com_178_neg	Pyridoxal 5-phosphate monohydrate	5-Á×ËáßÁ¶ßÈ©	1.7	C8H12NO7P	265.16	Vitamins	Î¬ÉúËØ	"41468-25-1"	2011000	2330000	1957000	2732000	3425000	2244000	0.749672658016903	-0.415667309605	0.138642270289417	0.888888888888889	1.81976111618524
Com_179_neg	DL-Serine	DL-Ë¿°±Ëá	0.83	C3H7NO3	105.09	Amino Acid And Its Derivatives	°±»ùËá¼°ÆäÑÜÉúÎï	"302-84-1"	794200	1044000	1459000	1273000	676900	1212000	1.04279072709447	0.0604496590311	0.864245956417593	0.444444444444444	0.115931660015092
Com_17_neg	Shikimic Acid	Ã§²ÝËá	5.24	C7H10O5	174.15	Alcohols and polyols	´¼ºÍ¶àÔª´¼	"138-59-0"	37160	190300	48140	31130	16460	212500	1.05963320389096	0.083564956765	0.704123132339032	0.666666666666667	0.500019202004471
Com_180_neg	Irbesartan	¶ò±´É³Ì¹	1.04	C25H28N6O	428.529	Benzene and substituted derivatives	±½¼°ÆäÑÜÉúÎï	"138402-11-6"	22560	19530	28350	34440	45260	16450	0.732605304212169	-0.448891948396	0.519157381484767	0.666666666666667	0.56797056988156
Com_181_neg	Hydroquinone	¶Ô±½¶þ·Ó	4.79	C6H6O2	110.111	Phenols And Its Derivatives	·ÓÀà¼°ÆäÑÜÉúÎï	"123-31-9"	4099	13130	12000	8594	3162	19590	0.932463472213361	-0.100880883717	0.925910384880833	0.555555555555556	0.187541129139783
Com_182_neg	Calcium D-Panthotenate	D-·ºËá¸Æ	4.59	C18H32CaN2O10	476.53	Vitamins	Î¬ÉúËØ	"137-08-6"	34020000	33560000	30120000	28290000	19410000	30130000	1.25530001284852	0.32803220507	0.212121767811599	0.888888888888889	1.40565640270252
Com_183_neg	L-Arabinose	°¢À­²®ÌÇ	0.9	C5H10O5	150.13	Carbohydrates And Its Derivatives	ÌÇÀà¼°ÆäÑÜÉúÎï	"5328-37-0"	14690	17570	20310	13100	15050	16360	1.18108290271849	0.24011023412	0.236726503321735	0.777777777777778	0.917764017249428
Com_184_neg	D-3-Phenyllactic acid	D-3-±½ÈéËá	6.77	C9H10O3	166.17	Organic Acid And Its Derivatives	ÓÐ»úËá¼°ÆäÑÜÉúÎï	"7326-19-4"	287900	245600	199600	211500	220300	414500	0.866241285596124	-0.207159161104	0.69612993530649	0.444444444444444	0.349289679171595
Com_185_neg	L-Glutamic acid monosodium salt	¹È°±ËáÄÆ	0.86	C5H8NNaO4	169.11	Amino Acid And Its Derivatives	°±»ùËá¼°ÆäÑÜÉúÎï	"142-47-2"	1135000	2207000	2095000	1896000	1415000	1376000	1.16001706848731	0.214146033319	0.655906316439159	0.666666666666667	0.44487327793299
Com_186_neg	L(+)-Asparagine monohydrate	L-Ìì¶¬õ£°·Ò»Ë®Îï	0.83	C4H8N2O3.H2O	150.13	Amino Acid And Its Derivatives	°±»ùËá¼°ÆäÑÜÉúÎï	"5794-13-8"	486700	1019000	1050000	730400	250800	746300	1.47942112879884	0.56503278533	0.373649591221957	0.777777777777778	0.841195326348884
Com_187_neg	Cytidine-5'-monophosphate	°ûÜÕ-5-µ¥Á×Ëá	0.97	C9H14N3O8P	323.197	Nucleotide And Its Derivates	ºËÜÕËá¼°ÆäÑÜÉúÎï	"63-37-6"	201300	299100	204400	24750	250600	144800	1.67749613233369	0.746309440125	0.337366558835935	0.777777777777778	1.29783198575255
Com_188_neg	L-Pyroglutamic acid	½¹¹È°±Ëá	1.689	C5H7NO3	129.11	Organic Acid And Its Derivatives	ÓÐ»úËá¼°ÆäÑÜÉúÎï	"98-79-3"	184900	106600	110900	69130	83970	67140	1.82709771158736	0.869553790097	0.0680610436697102	1	1.84023972075283
Com_189_neg	Citric acid	ÄûÃÊËá	1.516	C6H8O7	192.12	Tca Cycle	ÈýôÈËáÑ­»·	"77-92-9"	4356000	6714000	7372000	4956000	7737000	1479000	1.30129833474457	0.37995175123	0.468326584667483	0.555555555555556	0.846435401136128
Com_18_neg	Beta-Alanine	¦Â-°±»ù±ûËá	4.54	C3H7NO2	89.09	Amino Acid And Its Derivatives	°±»ùËá¼°ÆäÑÜÉúÎï	"107-95-9"	5819	5290	5296	4906	2427	4543	1.38135735938026	0.466086595419	0.239205913414206	1	1.41750433663926
Com_190_neg	DL-Norepinephrine	DL-È¥¼×ÉöÉÏÏÙËØ	0.917	C8H12ClNO3	205.639	Hormones	¼¤ËØ	"55-27-6"	36970	69380	47820	35690	48320	66440	1.0247258225324	0.0352379513056	0.933593149117336	0.444444444444444	0.241653166489418
Com_191_neg	Lactobionic acid	ÈéÌÇËá	0.91	C12H22O12	358.3	Carbohydrates And Its Derivatives	ÌÇÀà¼°ÆäÑÜÉúÎï	"96-82-2"	8430	10790	18920	49380	19670	17710	0.439603503918857	-1.18572520936	0.136767026628087	0.888888888888889	1.45244183476205
Com_192_neg	Fumaric acid	ÑÓºúË÷Ëá	1.82	C4H4O4	116.07	Tca Cycle	ÈýôÈËáÑ­»·	"110-17-8"	417200	819000	343000	545800	763400	544900	0.851733994930155	-0.231525162224	0.503279706947838	0.666666666666667	0.888137380873843
Com_193_neg	L-Arabinitol	L-(-)-°¢À­²®´¼	0.925	C5H12O5	152.15	Sugar Alcohols	ÌÇ´¼	"7643-75-6"	4639	8139	7111	6588	7618	6671	0.9526751927959	-0.0699436725842	0.711309153733189	0.555555555555556	0.604401840315127
Com_194_neg	Taurohyocholic acid sodium salt	Å£»ÇÖíµ¨ËáÄÆÑÎ	9.03	C26H44NNaO7S	537.69	Bile Acids	µ¨Ö­Ëá		932900	135000	224100	236700	1417000	215000	0.691389736180232	-0.532428908226	0.729594772883805	0.666666666666667	0.372531650093158
Com_195_neg	L-(-)-Glyceric acid	L-¸ÊÓÍËá	1.0	C3H6O4	106.077	Sugar Acids And Its Derivatives	ÌÇËá¼°ÆäÑÜÉúÎï	"28305-26-2"	193300	166500	70050	83670	137900	99290	1.33968085769495	0.421889358998	0.566341498160642	0.666666666666667	0.711649629973298
Com_196_neg	Lactic acid	ÈéËá	1.44	C3H6O3	90.078	Organic Acid And Its Derivatives	ÓÐ»úËá¼°ÆäÑÜÉúÎï	"50-21-5"	65520000	62140000	54100000	56010000	63200000	61750000	1.00442086648983	0.00636390551486	0.9721780453608	0.555555555555556	0.0465458743056849
Com_197_neg	L-Cysteinesulfinic acid	L-°ëë×ÑÇ»ÇËá	0.88	C3H7NO4S	153.16	Organic Acid And Its Derivatives	ÓÐ»úËá¼°ÆäÑÜÉúÎï	"1115-65-7"	18590	27160	49320	6573	9221	4047	4.79159316566705	2.26050542007	0.0151400692307426	1	1.88850645536705
Com_198_neg	L-Homocystine	L-¸ßë×°±Ëá	0.83	C8H16N2O4S2	268.354	Amino Acid And Its Derivatives	°±»ùËá¼°ÆäÑÜÉúÎï	"626-72-2"	13680	14960	16430	7133	15150	12150	1.3089187697848	0.388375567822	0.294134205705253	0.777777777777778	0.901695344773375
Com_199_neg	Linolelaidic Acid (C18:2N6T)	·´ÑÇÓÍËá	15.16	C18H32O2	280.445	Fatty Acyls	Ö¬·¾õ£Àà	"506-21-8"	40110	99890	77630	32020	81590	37620	1.43906632281955	0.525133083668	0.388003326191511	0.777777777777778	0.909631640725459
Com_19_neg	Erythronolactone	(3R,4R)-D-³àÍªËáÄÚõ¥	4.03	C4H6O4	118.09	Organoheterocyclic compounds	ÓÐ»úÔÓ»·»¯ºÏÎï	"15667-21-7"	89560	95760	92220	89780	104700	84240	0.995766360505166	-0.00612081653113	0.99572729665246	0.555555555555556	0.197556564666979
Com_1_neg	Tauro-alpha-Muricholic acid sodium salt	Å£»Ç-°¢¶û·¨-Êóµ¨ËáÄÆÑÎ	9.01	C26H44NO7S.Na	537.69	Bile Acids	µ¨Ö­Ëá	"25696-60-0"	869300	126800	215200	218200	1321000	194900	0.698517963208581	-0.517630878181	0.750978481476421	0.666666666666667	0.344204185129168
Com_200_neg	Lysopa 16:0	ÈÜÑªÂÑÁ×Ö¬Ëá16:0	12.54	C19H39O7P	410.48	Phospholipid	Á×Ö¬		10400	11360	11010	6070	15600	5158	1.22148501565529	0.288636165715	0.443950185443231	0.666666666666667	1.02278482537962
Com_201_neg	Lysope 14:0	ÈÜÑªÂÑÁ×Ö¬õ£ÒÒ´¼°·14:0	11.27	C19H40NO7P	425.5	Phospholipid	Á×Ö¬		2626	3837	2555	1859	2058	4862	1.02722405740973	0.0387508956368	0.767687703330544	0.666666666666667	0.367376444093992
Com_202_neg	Lysope 16:0	ÈÜÑªÂÑÁ×Ö¬õ£ÒÒ´¼°·16:0	12.48	C21H44NO7P	453.55	Phospholipid	Á×Ö¬		708700	744700	894400	663100	1098000	671100	0.965298906339939	-0.0509523505151	0.95360634694453	0.666666666666667	0.224663695563056
Com_203_neg	LysoPE 18:0	ÈÜÑªÁ×Ö¬õ£ÒÒ´¼°· 18:0	13.73	C23H48NO7P	481.6	Phospholipid	Á×Ö¬	"69747-55-3"	498300	1523000	1355000	1252000	1158000	1206000	0.933711283185841	-0.0989515778303	0.667469236507434	0.666666666666667	0.57285254980111
Com_204_neg	PE(18:1(9Z)/0:0)	PE(18:1(9Z)/0:0)	12.85	C23H46NO7P	479.6	Glycerolipids	¸ÊÓÍÖ¬Àà	"89576-29-4"	471000	614700	474700	554200	634200	412700	0.974579976266317	-0.0371475136849	0.913417710967669	0.555555555555556	0.0946936207197672
Com_205_neg	4-Hydroxyphenyllactate	¶ÔôÇ»ù±½ÈéËá	5.02	C9H10O4	182.173	Organic Acid And Its Derivatives	ÓÐ»úËá¼°ÆäÑÜÉúÎï	"6482-98-0"	342800	294900	145500	197300	199600	120100	1.51489361702128	0.599216484401	0.304234405844818	0.777777777777778	1.06184566270703
Com_206_neg	D-Glucosamine 6-phosphate	D-°±»ùÆÏÌÑÌÇ-6-Á×Ëá	0.86	C6H14NO8P	259.151	Sugar Acids And Its Derivatives	ÌÇËá¼°ÆäÑÜÉúÎï	"3616-42-0"	381900	726900	382900	280700	286200	707600	1.17041977245979	0.227026046931	0.608707050125919	0.777777777777778	0.63299378253523
Com_207_neg	2-Hydroxy-2-methylbutanedioic acid	2-ôÇ»ù-2-¼×»ù¶¡¶þËá	1.5	C5H8O5	148.114	Fatty Acyls	Ö¬·¾õ£Àà	"597-44-4"	55680	59810	66760	101300	46510	31820	1.01458553693704	0.0208904999027	0.738476521830187	0.666666666666667	0.603449515826619
Com_208_neg	3-(2-Naphthyl)-D-Alanine	3-(2-ÝÁ»ù)-D-±û°±Ëá	6.22	C13H13NO2	215.248	Amino Acid And Its Derivatives	°±»ùËá¼°ÆäÑÜÉúÎï	"76985-09-6"	29910	45560	46150	55070	57620	46280	0.765050009435743	-0.386374038576	0.175468798895168	1	0.930391938087329
Com_209_neg	dADP	2'-ÍÑÑõÏÙÜÕ-5'-¶þÁ×Ëá	0.75	C10H15N5O9P2	411.202	Nucleotide And Its Derivates	ºËÜÕËá¼°ÆäÑÜÉúÎï	"2793-06-8"	46290	55110	55770	51130	56290	64200	0.915802354037991	-0.126891821474	0.384990302584067	0.777777777777778	1.18439035791379
Com_20_neg	3-Hydroxypropanoic acid	3-ôÇ»ù±ûËá	1.15	C3H6O3	90.08	Organic Acid And Its Derivatives	ÓÐ»úËá¼°ÆäÑÜÉúÎï	"503-66-2"	26730	25740	23700	24030	24814	36940	0.887927818707451	-0.17148569289	0.547898969539657	0.444444444444444	0.544414834016176
Com_210_neg	2-deoxyglucose-6-phosphate	6-Á×Ëá-2-ÍÑÑõÆÏÌÑÌÇ	0.98	C6H13O8P	244.136	Nucleotide And Its Derivates	ºËÜÕËá¼°ÆäÑÜÉúÎï	"3573-50-0"	398300	1127000	898600	422700	312000	730900	1.65386189956332	0.725838771914	0.304437406733854	0.777777777777778	1.0986423479633
Com_211_neg	dGTP	2'-ÍÑÑõÄñÜÕ5'-ÈýÁ×Ëá	1.1	C10H16N5O13P3	507.181	Nucleotide And Its Derivates	ºËÜÕËá¼°ÆäÑÜÉúÎï	"2564-35-4"	60080	48120	9961	45890000	69370	121900	0.00256418714154362	-8.60728272695	0.263360240884464	1	1.28660590407431
Com_212_neg	3-Methylsalicylate	3-¼×·Ó»ÇËá	0.71	C8H8O3	152.147	Benzene and substituted derivatives	±½¼°ÆäÑÜÉúÎï	"83-40-9"	237600	234800	309900	115100	225000	300300	1.22158026233604	0.288748657113	0.452070188611731	0.777777777777778	0.981655583539213
Com_213_neg	Traumatic acid	·´Ê½-2-Ê®¶þÌ¼Ï©¶þËá	9.19	C12H20O4	228.28	Fatty Acyls	Ö¬·¾õ£Àà	"6402-36-4"	374700	369600	399300	394200	382300	383900	0.985522233712513	-0.0210396755669	0.603860938393211	0.666666666666667	0.445173408110139
Com_214_neg	2-Hydroxy-2-methylbutanoic acid	2-ôÇ»ù-2-¼×»ù¶¡Ëá	4.61	C5H10O3	118.13	Fatty Acyls	Ö¬·¾õ£Àà	"3739-30-8"	36150	46720	111300	38330	78420	120900	0.817041868293709	-0.29151808551	0.669272554745246	0.666666666666667	0.765459383643797
Com_215_neg	Pyridoxal 5'-phosphate hydrate	3-ôÇ»ù-2-¼×»ù-5-Á×õ£Ñõ¼×»ù-4-ßÁà¤¼×È©	1.63	C8H10NO6P	247.14	Pyridine And Its Derivatives	ßÁà¤¼°ÆäÑÜÉúÎï	"853645-22-4"	124000	129100	122400	140300	200500	136900	0.786058195520201	-0.34729196907	0.207634562387678	1	1.54416919319928
Com_216_neg	Quinic acid	¿üÄáËá	0.998	C7H12O6	192.17	Organic Acid And Its Derivatives	ÓÐ»úËá¼°ÆäÑÜÉúÎï	"77-95-2"	193900	340100	163000	288100	120500	159800	1.22624912033779	0.294252101513	0.552066346400607	0.777777777777778	0.814737259312132
Com_217_neg	Inositol	¼¡´¼	0.85	C6H12O6	180.16	Phenols And Its Derivatives	·ÓÀà¼°ÆäÑÜÉúÎï	"87-89-8"	148700	303600	303000	220500	106100	163800	1.54017128874388	0.623090807855	0.254836854400444	0.777777777777778	1.17778704124423
Com_218_neg	2,4-Dihydroxybenzoic Acid	2,4-¶þôÇ»ù±½¼×Ëá	1.7	C7H6O4	154.12	Benzoic Acid And Its Derivatives	±½¼×Ëá¼°ÆäÑÜÉúÎï	"89-86-1"	7025	5971	5822	5029	6490	4505	1.17436345481777	0.231878978562	0.260699823403418	0.777777777777778	1.19438077323485
Com_219_neg	Linoleic acid	ÑÇÓÍËá(C18:2)	15.19	C18H32O2	280.4	Fatty Acyls	Ö¬·¾õ£Àà	"60-33-3"	42500	109600	73230	40280	45110	27100	2.00311138767891	1.0022426478	0.128581965411569	0.888888888888889	1.60567364812158
Com_21_neg	Hydroxyphenyllactic acid	ôÇ±½»ùÈéËá	5.07	C9H10O4	182.17	Organic Acid And Its Derivatives	ÓÐ»úËá¼°ÆäÑÜÉúÎï	"306-23-0"	385700	310100	156300	224500	229400	142700	1.42826014079785	0.514258773245	0.38983749162664	0.777777777777778	0.92212969770262
Com_220_neg	gamma-Linolenic acid	¦Ã-ÑÇÂéËá(C18:3)	12.03	C18H30O2	278.4	Fatty Acyls	Ö¬·¾õ£Àà	"506-26-3"	177200	179300	159900	198400	178100	178100	0.931121529029932	-0.102958615732	0.235507116647609	0.777777777777778	0.743846660036705
Com_221_neg	Trans,Trans-Muconic Acid	·´,·´-Õ³¿µËá	0.96	C6H6O4	142.11	Fatty Acyls	Ö¬·¾õ£Àà	"3588-17-8"	8586	10580	6987	9100	5025	8032	1.18034932526967	0.239213889461	0.454416552028155	0.666666666666667	0.882678810147604
Com_222_neg	5-Hydroxyhexanoic Acid	5-ôÇ»ù¼ºËá	6.36	C6H12O3	132.16	Fatty Acyls	Ö¬·¾õ£Àà	"185956-02-9"	60710	66950	75340	98100	84620	105200	0.705056960266741	-0.504188279965	0.0175353489604006	1	1.60810640234035
Com_223_neg	Cis-4,7,10,13,16,19-Docosahexaenoic Acid(C22:6N3)	Ë³Ê½-4,7,10,13,16,19-¶þÊ®¶þÌ¼ÁùÏ©Ëá	14.89	C22H32O2	328.5	Fatty Acyls	Ö¬·¾õ£Àà	"6217-54-5"	45630	39030	48430	54700	36410	44260	0.983157272660117	-0.0245058763501	0.96010554658471	0.555555555555556	0.284165706901384
Com_224_neg	Adenosine5-phosphosulfate	ÏÙÜÕ5-Á×õ£ÁòËá¶þÄÆÑÎ	1.04	C10H13N5NaO10PS	449.266	Nucleotide And Its Derivates	ºËÜÕËá¼°ÆäÑÜÉúÎï	"102029-95-8"	11340	33795	35660	42290	16490	31510	0.894838852586111	-0.160300197435	0.752232660581549	0.444444444444444	0.366548573026082
Com_225_neg	Adenosine5'-diphosphoglucose	5'-¶þÁ×ËáÆÏÌÑÌÇÏÙÜÕ¶þÄÆÑÎ	1.02	C16H23N5Na2O15P2	633.305	Nucleotide And Its Derivates	ºËÜÕËá¼°ÆäÑÜÉúÎï	"102129-65-7"	35700	36330	55100	20290	33230	38380	1.38335146898803	0.468167749508	0.23632042091947	0.777777777777778	0.776495339824413
Com_226_neg	Adenosine 5'-Diphosphate	¶þÁ×ËáÏÙÜÕ	1.04	C10H15N5O10P2	427.201	Nucleotide And Its Derivates	ºËÜÕËá¼°ÆäÑÜÉúÎï	"58-64-0"	284500	382200	399000	17790000	4577000	7111000	0.0361523848293643	-4.78976537059	0.0113328599761357	1	1.94020789276518
Com_227_neg	8,15-Dihete	8,15-¶þôÇ»ù¶þÊ®Ì¼ËÄÏ©Ëá	7.14	C20H32O4	336.466	Eicosanoid	Ñõ»¯Ö¬ÖÊ	"80234-65-7"	5206	3615	4040	5927	4436	4565	0.86153536977492	-0.215018068314	0.345391615360981	0.777777777777778	0.83621875748086
Com_228_neg	5-Methyl-dl-tryptophan	5-¼×»ù-DL-É«°±Ëá	4.26	C12H14N2O2	218.252	Amino Acid And Its Derivatives	°±»ùËá¼°ÆäÑÜÉúÎï	"951-55-3"	211800	112100	268500	62030	118300	55060	2.51667445515952	1.33151860851	0.0601441901317064	0.888888888888889	1.63192817682842
Com_229_neg	5-Hydroxyindole-2-carboxylic acid	5-ôÇ»ùßÅßá-2-¼×Ëá	0.71	C9H7NO3	177.157	Indole And Its Derivatives	ßÅßá¼°ÆäÑÜÉúÎï	"21598-06-1"	294800	343000	285100	333000	303300	262200	1.02715637173066	0.0386558306798	0.769124381355492	0.444444444444444	0.38589816054106
Com_22_neg	4-Hydroxyphenylethanol	¶ÔôÇ»ù±½ÒÒ´¼	7.61	C8H10O2	138.16	Phenols And Its Derivatives	·ÓÀà¼°ÆäÑÜÉúÎï	"501-94-0"	542700	525100	533300	482600	479900	445200	1.1373872273922	0.185723508347	0.0268546529989969	1	2.30739960488525
Com_230_neg	Guanidinoacetic acid	ëÒ»ùÒÒËá	1.13	C3H7N3O2	117.107	Organic Acid And Its Derivatives	ÓÐ»úËá¼°ÆäÑÜÉúÎï	"352-97-6"	9243	25420	21350	19550	24850	21830	0.845734561377019	-0.24172315858	0.510500802248337	0.555555555555556	0.814675086065643
Com_231_neg	D-Fructose 6-phosphate	D-¹ûÌÇ-6-Á×Ëá	0.87	C6H13O9P	260.03	Carbohydrates And Its Derivatives	ÌÇÀà¼°ÆäÑÜÉúÎï	"643-13-0"	230800000	74760000	59680000	219500000	289100000	146200000	0.557788637751985	-0.842209548162	0.216167518175918	0.777777777777778	1.31066782726129
Com_232_neg	5-oxoproline	5-Ñõ»¯¸¬°±Ëá	1.63	C5H7NO3	129.043	Amino Acid And Its Derivatives	°±»ùËá¼°ÆäÑÜÉúÎï	"149-87-1"	145100	75030	81190	47270	61440	56250	1.82662463627546	0.869180196625	0.100037161636982	1	1.74453789821703
Com_233_neg	Deoxycytidine	ÍÑÑõ°ûÜÕ	1.81	C9H13N3O4	227.091	Nucleotide And Its Derivates	ºËÜÕËá¼°ÆäÑÜÉúÎï	"951-77-9"	49070	44210	46630	29740	37680	23410	1.54035010459099	0.623258296863	0.0757481545856113	1	1.48927501341777
Com_234_neg	UDP-D-glucose	ÄòÜÕ 5'-¶þÁ×ËáÆÏÌÑÌÇ	0.95	C15H24N2O17P2	566.1	Carbohydrates And Its Derivatives	ÌÇÀà¼°ÆäÑÜÉúÎï	"133-89-1"	1701000	2570000	3030000	3653000	2970000	2036000	0.843168957154406	-0.246106342457	0.52071289114979	0.666666666666667	0.716314932570057
Com_235_neg	12,13-EODE	12,13-»·ÑõÊ®°ËÌ¼¶þÏ©Ëá	12.67	C18H32O3	296.0	Eicosanoid	Ñõ»¯Ö¬ÖÊ		73220	100100	86340	40680	66530	15500	2.11604596202428	1.08137096416	0.163978619385017	1	1.65596584722216
Com_236_neg	Sodium cholate	µ¨ËáÄÆ	10.34	C24H39NaO5	430.55	Bile Acids	µ¨Ö­Ëá	"361-09-1"	2334	2146	6310	3095	3263	4633	0.981712310071877	-0.0266277889233	0.750374809349504	0.666666666666667	0.527228922432921
Com_237_neg	Tropolone	»·¸ýÈýÏ©·ÓÍª	7.39	C7H6O2	122.12	Ketones	ÍªÀà	"533-75-5"	108100	194000	102500	121200	145100	134000	1.01074194354234	0.0154147041707	0.89643163094815	0.666666666666667	0.374200813488353
Com_238_neg	Bisphenol A	Ë«·ÓA	9.58	C15H16O2	228.29	Phenols And Its Derivatives	·ÓÀà¼°ÆäÑÜÉúÎï	"80-05-7"	13980	17330	14770	14520	19390	13090	0.980425531914894	-0.02852004001	0.9460608156685	0.555555555555556	0.365633486325029
Com_239_neg	Cyclohexaneacetic acid	»·¼º»ùÒÒËá	1.03	C8H14O2	142.2	Fatty Acyls	Ö¬·¾õ£Àà	"5292-21-7"	406700	794300	707200	967400	384600	759900	0.903546569439841	-0.146329134341	0.847584642374271	0.555555555555556	0.201886207578315
Com_23_neg	Isocytosine	Òì°ûà×à¤	0.91	C4H5N3O	111.1	Nucleotide And Its Derivates	ºËÜÕËá¼°ÆäÑÜÉúÎï	"108-53-2"	3733	5735	4280	6315	5555	5429	0.794728018960634	-0.331466885852	0.185133562899264	0.777777777777778	1.34859431777431
Com_240_neg	4-Nitrophenol	4-Ïõ»ù±½·Ó	7.71	C6H5NO3	139.11	Phenols And Its Derivatives	·ÓÀà¼°ÆäÑÜÉúÎï	"100-02-7"	1411000	1472000	1247000	1380000	1280000	1328000	1.03560682046138	0.0504763719086	0.5898920841335	0.666666666666667	0.796930195006142
Com_242_neg	CDP	5-°ûÜÕ¶þÁ×Ëá	0.99	C9H15N3O11P2	403.176	Nucleotide And Its Derivates	ºËÜÕËá¼°ÆäÑÜÉúÎï	"63-38-7"	9867	7237	38020	207300	41420	335600	0.0943387185104053	-3.40600618623	0.0484161692916722	1	1.66595555106162
Com_243_neg	N-Methylhydantoin	¼×õ£ÒÒÄÚëå	1.39	C4H6N2O2	114.1	Organoheterocyclic compounds	ÓÐ»úÔÓ»·»¯ºÏÎï	"616-04-6"	2908000	3828000	3092000	3332000	3708000	3072000	0.971914556962025	-0.0410986058149	0.762268230282015	0.555555555555556	0.523215354795183
Com_244_neg	UDP-D-glucuronate	ÄòÜÕ-5'-¶þÁ×ËáÆÏÌÇÈ©Ëá	0.94	C15H22N2O18P2	580.285	Nucleotide And Its Derivates	ºËÜÕËá¼°ÆäÑÜÉúÎï	"2616-64-0"	141700	132900	65690	546300	311600	175900	0.329164248403947	-1.6031204464	0.0650488128382966	1	1.68223983085706
Com_245_neg	UDP-galactose	ÄòÜÕ-5'-¶þÁ×Ëá°ëÈéÌÇ	0.92	C15H22N2Na2O17P2	610.265	Nucleotide And Its Derivates	ºËÜÕËá¼°ÆäÑÜÉúÎï	"2956-16-3"	2827000	3921000	5136000	5987000	5204000	3760000	0.794863219851515	-0.331221472251	0.340119293244313	0.777777777777778	0.955417498395555
Com_246_neg	geranyl pp	½¹Á×ËáÏãÒ¶õ¥	0.83	C10H20O7P2	314.209	Prenol lipids	Ï©´¼õ¥		16620	27790	20070	5435	16400	12890	1.856875449964	0.892877049659	0.16202283566131	1	1.78505573506543
Com_247_neg	Glyceraldehyde 3-phosphate diethyl acetal	DL-¸ÊÓÍÈ©Ëõ¶þÒÒ´¼-3-Á×ËáÒ»±µÑÎ	0.96	C7H15BaO7P	379.491	Organic Acid And Its Derivatives	ÓÐ»úËá¼°ÆäÑÜÉúÎï	"93965-35-6"	596200	649100	718400	365700	850100	530700	1.12436301173776	0.169107899154	0.552842163424536	0.666666666666667	0.750278883983101
Com_248_neg	1,2,3-Benzenetricarboxylic acid	1,2,3-±½Èý¼×Ëá	6.42	C9H6O6	210.14	Benzoic Acid And Its Derivatives	±½¼×Ëá¼°ÆäÑÜÉúÎï	"569-51-7"	6715	4026	6826	6731	6080	5728	0.947569987593721	-0.0776955900992	0.695468518310349	0.555555555555556	0.243594321449103
Com_249_neg	2-Phosphoglyceric acid	2-Á×Ëá¸ÊÓÍËá	0.92	C3H7O7P	186.057	Carbohydrates And Its Derivatives	ÌÇÀà¼°ÆäÑÜÉúÎï	"2553-59-5"	3463000	171100	144800	1746000	647800	376400	1.36412533391091	0.447976203237	0.670402731446099	0.666666666666667	0.807477377103987
Com_24_neg	13,14-dihydro-15-keto-PGD2	13,14-¶þÇâ-15-ÍªPGD2	1.04	C20H32O5	352.465	Eicosanoid	Ñõ»¯Ö¬ÖÊ	"59894-07-4"	26070	26890	22090	29660	25310	12560	1.11135791500074	0.152323514333	0.598430863443271	0.555555555555556	0.450645824895909
Com_250_neg	Citraconic acid	Äû¿µËá	1.56	C5H6O4	130.099	Fatty Acyls	Ö¬·¾õ£Àà	"498-23-7"	251200	257000	282100	296900	350500	142000	1.00114010640993	0.0016438889375	0.826033946256892	0.666666666666667	0.274676485525647
Com_251_neg	Citramalate	¼×»ùÆ»¹ûËá	1.44	C5H8O5	148.114	Organic Acid And Its Derivatives	ÓÐ»úËá¼°ÆäÑÜÉúÎï	"2306-22-1"	10980	34910	16910	11080	29000	6021	1.36222641591289	0.445966513898	0.520747128758893	0.666666666666667	0.811792671015339
Com_252_neg	Cyclohexylsulfamate	»·À­Ëá	1.2	C6H13NO3S	179.237	Organic Acid And Its Derivatives	ÓÐ»úËá¼°ÆäÑÜÉúÎï	"100-88-9"	77140	120500	100200	60700	68180	97400	1.31624535973131	0.396428445208	0.220844090266315	0.888888888888889	1.06489004897826
Com_253_neg	Cytidine 3'-phosphate	°ûà¤-3'-µ¥Á×Ëá	1.22	C9H14N3O8P	323.197	Nucleotide And Its Derivates	ºËÜÕËá¼°ÆäÑÜÉúÎï	"84-52-6"	274500	372600	178700	43900	271800	241200	1.48285149937152	0.568374125879	0.410080102696994	0.777777777777778	0.962543287799191
Com_254_neg	D-Arabinose 5-phosphate	D-°¢À­²®ÌÇ5-Á×Ëáõ¥	0.9	C5H11O8P	230.11	Carbohydrates And Its Derivatives	ÌÇÀà¼°ÆäÑÜÉúÎï	"13137-52-5"	6791000	13900000	14660000	2706000	7728000	5988000	2.15266106442577	1.10612118566	0.120957978278462	0.888888888888889	1.45198568175812
Com_255_neg	L-Adrenaline	ÉöÉÏÏÙËØ	1.034	C9H13NO3	183.204	Hormones	¼¤ËØ	"51-43-4"	49439	50300	51480	47750	27780	32450	1.40043526578996	0.485875297313	0.151997695763924	1	1.49071463638907
Com_256_neg	Prostaglandin E2	Ç°ÁÐÏÙËØE2	9.378	C20H32O5	352.465	Hormones	¼¤ËØ	"363-24-6"	10850	19120	13932	6385	14340	4912	1.7124468541561	0.77605921468	0.185902118757159	0.777777777777778	0.937067662957068
Com_257_neg	L-Ascorbate	¿¹»µÑªËá	1.03	C6H8O6	176.12	Vitamins	Î¬ÉúËØ	"50-81-7"	2485000	3886000	1721000	2429000	2502000	1065000	1.34956637758506	0.43249593661	0.439925143749408	0.666666666666667	0.794012133030878
Com_258_neg	4-Amino-5-imidazolecarboxamide	5-°±»ùßäßò-4-ôÈËá°·	0.915	C4H6N4O	126.12	Organoheterocyclic compounds	ÓÐ»úÔÓ»·»¯ºÏÎï	"360-97-4"	10410	28780	25710	13170	10790	16340	1.61042183622829	0.687438639471	0.341914301841552	0.666666666666667	1.08696724201227
Com_259_neg	Xanthine	»ÆàÑßÊ	1.714	C5H4N4O2	152.11	Nucleotide And Its Derivates	ºËÜÕËá¼°ÆäÑÜÉúÎï	"69-89-6"	2676000	2440000	4195000	1901000	3017000	1541000	1.44155442018888	0.527625301109	0.221978840134546	0.777777777777778	1.13309082733218
Com_25_neg	dCMP	2'-ÍÑÑõ°ûÜÕ-5'-µ¥Á×Ëá	1.04	C9H14N3O7P	307.197	Nucleotide And Its Derivates	ºËÜÕËá¼°ÆäÑÜÉúÎï	"1032-65-1"	66770	35220	46110	42810	38380	33520	1.29108185859995	0.368580474892	0.350044997644239	0.777777777777778	0.777287430327944
Com_260_neg	4-Hydroxybenzoic acid	4-ôÇ»ù±½¼×Ëá	5.379	C7H6O3	138.12	Benzoic Acid And Its Derivatives	±½¼×Ëá¼°ÆäÑÜÉúÎï	"99-96-7"	301400	331900	310400	335600	295000	318300	0.994519970492149	-0.00792775345055	0.922110849149291	0.555555555555556	0.110602474872749
Com_261_neg	Deoxyinosine	2-ÍÑÑõ¼¡ÜÕ	3.33	C10H12N4O4	252.23	Nucleotide And Its Derivates	ºËÜÕËá¼°ÆäÑÜÉúÎï	"890-38-0"	142700	128000	252300	176800	173100	79650	1.21755325340473	0.283984874355	0.56367862237842	0.444444444444444	0.752775245645266
Com_262_neg	Indoxylsulfuric acid	ßÅßáÁòËá	5.62	C8H7NO4S	213.21	Organic Acid And Its Derivatives	ÓÐ»úËá¼°ÆäÑÜÉúÎï	"487-94-5"	6395	8622	8209	6030	3773	5586	1.50925986093963	0.593841227211	0.0811024629234891	1	1.6552723628565
Com_263_neg	Glutaric Acid	Îì¶þËá	0.7	C5H8O4	132.115	Organic Acid And Its Derivatives	ÓÐ»úËá¼°ÆäÑÜÉúÎï	"110-94-1"	2725000	1361000	2329000	1533000	1537000	1614000	1.36955593509821	0.453708189476	0.322754879881363	0.666666666666667	1.13899635139585
Com_264_neg	N-Acetyl-Asp-Glu	N-ÒÒõ£-Ìì¶¬°±Ëá-¹È°±Ëá	2.02	C11H16N2O8	304.253	Amino Acid And Its Derivatives	°±»ùËá¼°ÆäÑÜÉúÎï	"3106-85-2"	251600	240300	224100	543900	335800	116300	0.718875502008032	-0.476186154804	0.773725444986562	0.666666666666667	0.336674939645959
Com_265_neg	N-lactoyl-phenylalanine	N-Èéõ£»ù±½±û°±Ëá	6.97	C12H15NO4	237.25	Amino Acid And Its Derivatives	°±»ùËá¼°ÆäÑÜÉúÎï		336100	157400	276200	289800	229400	120400	1.20340838023765	0.267126308486	0.595134039810493	0.666666666666667	0.682052724943723
Com_266_neg	Orotidine	ÈéÇåÜÕ	1.0	C10H12N2O8	288.211	Nucleotide And Its Derivates	ºËÜÕËá¼°ÆäÑÜÉúÎï	"314-50-1"	21460	11750	15430	7100	13160	20800	1.18460789089138	0.244409601335	0.560997265634479	0.666666666666667	0.698536062752872
Com_267_neg	NADH	»¹Ô­ÐÍ¸¨Ã¸¢ñ	2.79	C21H29N7O14P2	665.441	Co-Enzyme Factor	¸¨Ã¸Òò×Ó	"58-68-4"	566700	126500	172400	1721000	900600	179900	0.308977333571301	-1.69442708829	0.278598695355974	0.888888888888889	1.03946395854985
Com_268_neg	Chenodeoxycholic acid	¶ìÈ¥Ñõµ¨Ëá	11.768	C24H40O4	392.57	Bile Acids	µ¨Ö­Ëá	"474-25-9"	109000	20500	5702	26742	16970	23525	2.01082737183396	1.00778923257	0.95159830430278	0.555555555555556	0.532567910884889
Com_269_neg	Deoxycholic acid	ÍÑÑõµ¨Ëá	11.976	C24H40O4	392.57	Bile Acids	µ¨Ö­Ëá	"83-44-3"	19350	34200	21010	22950	22320	23440	1.08514044535002	0.117881776953	0.809353361620379	0.666666666666667	0.369184837959603
Com_26_neg	Pantetheine	·ºõ£ÛÏ»ùÒÒ°·	5.84	C11H22N2O4S	278.13	Amino Acid And Its Derivatives	°±»ùËá¼°ÆäÑÜÉúÎï	"496-65-1"	133000	152800	68350	34450	45180	75150	2.28808631606151	1.19414147756	0.0713422665342171	0.888888888888889	1.64354615469627
Com_270_neg	lithocholic acid	Ê¯µ¨Ëá	11.159	C24H40O3	376.57	Bile Acids	µ¨Ö­Ëá	"434-13-9"	1893000	2687000	2762000	1995000	1478000	2622000	1.20459392945037	0.268546893592	0.391840910656006	0.777777777777778	0.815724312722248
Com_271_neg	Cholic acid	µ¨Ëá	10.361	C24H40O5	408.57	Bile Acids	µ¨Ö­Ëá	"81-25-4"	274200	12170	17570	18190	79090	3342	3.02061179463736	1.59484078256	0.568340968321677	0.444444444444444	0.792858286673654
Com_272_neg	Tauroursodeoxycholic acid Dihydrate	Å£»ÇÐÜÍÑÑõµ¨Ëá¶þË®ºÏÎï	9.015	C26H45NO6S.2H2O	535.7	Bile Acids	µ¨Ö­Ëá	"14605-22-2"	13060	22177	22270	5079	18550	14350	1.51417888833303	0.598535658471	0.322458549395443	0.777777777777778	0.969746607054008
Com_273_neg	Myristic acid	Èâ¶¹Þ¢Ëá	1.03	C14H28O2	228.371	Fatty Acyls	Ö¬·¾õ£Àà	"544-63-8"	319700	447700	301400	3940000	589100	2747000	0.146891878891164	-2.76717345806	0.097887426654643	1	1.92947165087073
Com_274_neg	gamma-Glutamylcysteine	5-L-¹È°±õ£-L-°ëë×°±Ëá	1.48	C8H14N2O5S	250.272	Amino Acid And Its Derivatives	°±»ùËá¼°ÆäÑÜÉúÎï	"636-58-8"	52510	86080	256800	65170	86480	34880	2.11971264675923	1.0838687029	0.349157999149692	0.666666666666667	1.11005452281937
Com_275_neg	Sorbitol	É½Àæ´¼	0.91	C6H14O6	182.172	Sugar Alcohols	ÌÇ´¼	"50-70-4"	14790	12670	15100	34590	26390	22430	0.510250569476082	-0.970722207478	0.0212847399224862	1	2.22934648200302
Com_276_neg	Taurodeoxycholic acid sodium salt	Å£»ÇÍÑÑõµ¨ËáÄÆÑÎ	10.504	C26H44NNaO6S	521.69	Bile Acids	µ¨Ö­Ëá	"1180-95-6"	3275000	576700	1042000	695100	3290000	827300	1.0168938575347	0.0241690998445	0.986086206792994	0.444444444444444	0.0678172276464335
Com_277_neg	Taurohyodeoxycholic acid sodium salt	Å£»ÇÖíÍÑÑõµ¨ËáÄÆÑÎ	8.928	C26H44NNaO6S	521.69	Bile Acids	µ¨Ö­Ëá	"110026-03-4"	16710	10730	18313	8097	17060	13940	1.1702432411694	0.226808432677	0.558535240628072	0.666666666666667	0.36513218845774
Com_278_neg	L-SelenoMethionine	L-Îø´úµ°°±Ëá	18.27	C5H11NO2Se	196.11	Amino Acid And Its Derivatives	°±»ùËá¼°ÆäÑÜÉúÎï	"3211-76-5"	1452000	1484000	1443000	1350000	1414000	1388000	1.05467244701349	0.0767950060948	0.0369013282235563	1	1.74571339130842
Com_279_neg	4-Hydroxyisoleucine	4-ôÇ»ù-L-ÒìÁÁ°±Ëá	1.038	C6H13NO3	147.172	Amino Acid And Its Derivatives	°±»ùËá¼°ÆäÑÜÉúÎï	"781658-23-9"	976600	1857000	1902000	1667000	1264000	1173000	1.15389863547758	0.206516495633	0.679602536536877	0.666666666666667	0.435743207797055
Com_27_neg	4-Hydroxy-2-oxoglutaric acid	4-ôÇ»ù-2-ÍªÎì¶þËá	0.74	C5H6O6	162.098	Organic Acid And Its Derivatives	ÓÐ»úËá¼°ÆäÑÜÉúÎï	"1187-99-1"	4860000	4465000	4208000	4153000	4928000	4545000	0.993174812857772	-0.00988041998753	0.928810719131681	0.555555555555556	0.123753891313685
Com_280_neg	Ala-Gln	L-±û°±õ£-L-¹È°±õ£°·	0.85	C8H15N3O4	217.22	Amino Acid And Its Derivatives	°±»ùËá¼°ÆäÑÜÉúÎï	"39537-23-0"	502900	1102000	706300	1343000	908000	1631000	0.595363214837712	-0.748158009036	0.13529119582793	0.888888888888889	1.22722871049015
Com_281_neg	O-Aceyl-L-Serine	O-ÒÒõ£»ù-l-Ë¿°±Ëá	1.056	C5H9NO4	147.129	Amino Acid And Its Derivatives	°±»ùËá¼°ÆäÑÜÉúÎï	"5147-00-2"	5803	14350	13770	20010	3872	23270	0.719439260264676	-0.475055204467	0.830371037275967	0.666666666666667	0.288316230336197
Com_282_neg	(S)-Leucic acid	ôÇ»ùÒì¼ºËáÒÒõ¥	6.404	C6H12O3	132.16	Organic Acid And Its Derivatives	ÓÐ»úËá¼°ÆäÑÜÉúÎï	"13748-90-8"	64750	49600	79150	74980	62710	111200	0.777451886375507	-0.363174699947	0.332215291009626	0.666666666666667	0.976685585366637
Com_283_neg	Lactose	ÈéÌÇ	0.911	C12H22O11	342.3	Carbohydrates And Its Derivatives	ÌÇÀà¼°ÆäÑÜÉúÎï	"63-42-3"	158000	67260	91780	70550	183800	130100	0.824658603199376	-0.278131106932	0.652067617755164	0.666666666666667	0.503910134469122
Com_284_neg	3-Hydroxyisovalerate	¦Â-ôÇ»ùÒìÎìËá	4.084	C5H10O3	118.13	Organic Acid And Its Derivatives	ÓÐ»úËá¼°ÆäÑÜÉúÎï	"625-08-1"	87420	100400	92090	81090	105600	85350	1.028929569181	0.0411442323088	0.735562017558705	0.666666666666667	0.375065672029971
Com_285_neg	5-Hydroxymethyluracil	5-ôÇ¼×»ùÄòà×à¤	1.041	C5H6N2O3	142.11	Nucleotide And Its Derivates	ºËÜÕËá¼°ÆäÑÜÉúÎï	"4433-40-3"	12250	23420	17360	18170	21710	19040	0.900033944331297	-0.151948681895	0.545732104927243	0.666666666666667	0.728408813097431
Com_286_neg	9-HpOTrE	9-ôÇ»ù¹ýÑõÊ®°ËÌ¼ÈýÏ©Ëá	10.92	C18H30O4	310.1	Fatty Acyls	Ö¬·¾õ£Àà	"111004-08-1"	302900	301700	281400	271600	286900	300500	1.0314318975553	0.0446485674166	0.456311914318583	0.777777777777778	0.768952034181713
Com_287_neg	N-Acetylalanine	N-ÒÒõ£-L-±û°±Ëá	2.15	C5H9NO3	131.13	Amino Acid And Its Derivatives	°±»ùËá¼°ÆäÑÜÉúÎï	"97-69-8"	212400	303600	332400	278600	389700	199500	0.977644618575709	-0.0326179652862	0.989042491840939	0.555555555555556	0.346230295696744
Com_288_neg	Methyl beta-D-galactopyranoside	¼×»ù-¦Â-D-ßÁà«°ëÈéÌÇÜÕ	1.03	C7H14O6	194.182	Carbohydrates And Its Derivatives	ÌÇÀà¼°ÆäÑÜÉúÎï	"1824-94-8"	13690	10600	14280	7142	6600	9290	1.67462660646058	0.743839451953	0.0207818190462064	1	1.47923036551813
Com_289_neg	Lysops 22:6	ÈÜÑªÂÑÁ×Ö¬õ£Ë¿°±Ëá22:6	13.14	C28H44NO9P	569.62	Phospholipid	Á×Ö¬		84590	89120	92140	54820	88710	56470	1.32925	0.410612466421	0.182643725891811	0.888888888888889	1.6070469277895
Com_28_neg	beta-Hydroxyisobutyrate	¦Â-ôÇ»ùÒì¶¡Ëá	2.4	C4H8O3	104.104	Organic Acid And Its Derivatives	ÓÐ»úËá¼°ÆäÑÜÉúÎï	"2068-83-9"	746800	484700	397000	753300	828800	311000	0.860229253605198	-0.217206901394	0.799106466168172	0.666666666666667	0.408322176126131
Com_290_neg	Lysope 18:1	ÈÜÑªÂÑÁ×Ö¬õ£ÒÒ´¼°·18:1	12.81	C23H46NO7P	479.588	Phospholipid	Á×Ö¬		506500	652100	510900	561000	658900	435900	1.00827394612876	0.0118876696178	0.921699563264595	0.555555555555556	0.094547113434088
Com_291_neg	Hydroxyglutaric acid	2-ôÇ»ù-Îì¶þËá	1.45	C5H8O5	148.11	Organic Acid And Its Derivatives	ÓÐ»úËá¼°ÆäÑÜÉúÎï	"13095-47-1"	119100	282100	208800	330700	175400	143400	0.939183987682833	-0.0905202829976	0.881254708088642	0.444444444444444	0.20006570177089
Com_292_neg	Hydroxypyruvic acid	3-ôÇ»ù-2-Ñõ´ú±ûËá	2.17	C3H4O4	104.061	Organic Acid And Its Derivatives	ÓÐ»úËá¼°ÆäÑÜÉúÎï	"1113-60-6"	6495000	1328000	3218000	7405000	8460000	980300	0.655435047164491	-0.609475276724	0.769392088214342	0.666666666666667	0.482376581224529
Com_293_neg	IDP	¶þÁ×Ëá¼¡¸Ê	1.02	C10H13N4O15P3	522.149	Nucleotide And Its Derivates	ºËÜÕËá¼°ÆäÑÜÉúÎï	"86-04-4"	504700	514800	407800	1710000	1280000	1104000	0.348632144601856	-1.52022249984	0.00475008879284027	1	1.66068300205885
Com_294_neg	alpha-D-Galactose 1-phosphate	¦Á-D-°ëÈéÌÇ-1-Á×Ëá	0.87	C6H13O9P	260.136	Sugar Acids And Its Derivatives	ÌÇËá¼°ÆäÑÜÉúÎï	"2255-14-3"	194200000	59950000	46520000	169500000	231100000	124800000	0.57226874762086	-0.805235273399	0.23224453828495	0.777777777777778	1.35867337911398
Com_295_neg	Gamma-Glu-Leu	¦Ã-¹È°±Ëá-ÁÁ°±Ëá	5.09	C11H20N2O5	260.287	Organic Acid And Its Derivatives	ÓÐ»úËá¼°ÆäÑÜÉúÎï	"2566-39-4"	13580	17870	24930	19000	24300	20230	0.887454745789391	-0.17225454123	0.508459036674854	0.666666666666667	0.701326443039846
Com_296_neg	N-Acetyl-D-glucosamine 6-phosphate	6-Á×Ëá-NÒÒõ£-D-°±»ùÆÏÌÑÌÇ	1.81	C8H16NO9P	301.188	Sugar Acids And Its Derivatives	ÌÇËá¼°ÆäÑÜÉúÎï		194000	217600	256900	99940	161100	116900	1.76879928030904	0.822770343262	0.0330699978773999	1	1.21834837477453
Com_297_neg	Glycerol-3-phosphate	¸ÊÓÍÁ×Ëáõ¥	0.9	C3H9O6P	172.074	Fatty Acyls	Ö¬·¾õ£Àà	"57-03-4"	1896000	1240000	812500	60780000	3050000	38410000	0.0386199139280125	-4.69451124081	0.0899707647360948	1	1.98267929871076
Com_298_neg	DL-3,4-Dihydroxyphenyl glycol	DL-3,4-¶þôÇ»ù±½»ù¶þ´¼	7.37	C8H10O4	170.163	Benzene and substituted derivatives	±½¼°ÆäÑÜÉúÎï	"28822-73-3"	36710	38110	33360	36600	36460	37980	0.974243515850144	-0.0376456704248	0.567143398666153	0.555555555555556	0.634995709059547
Com_299_pos	Lysopc 16:1	ÈÜÑªÂÑÁ×Ö¬õ£µ¨¼î16:1	11.75	C24H48NO7P	493.61	Phospholipid	Á×Ö¬		102400	118200	139800	75750	252700	39700	0.978948798044275	-0.0306946903591	0.673170185411497	0.666666666666667	0.534991050774681
Com_29_neg	Undecanedioic acid	Ê®Ò»Íé¶þËá	8.77	C11H20O4	216.27	Fatty Acyls	Ö¬·¾õ£Àà	"1852-04-6"	396800	421300	372700	401300	397300	414400	0.981698268755153	-0.0266484237698	0.645272811753425	0.666666666666667	0.531801249231088
Com_2_neg	2,3-Dinor-TXB2	2,3-¶þÕýÄýÑª¶ñÍé	0.97	C18H30O6	342.427	Eicosanoid	Ñõ»¯Ö¬ÖÊ	"63250-09-9"	61570	34490	27830	59710	28670	26500	1.07842966573816	0.108932088228	0.814123492837096	0.666666666666667	0.687396187916831
Com_300_pos	Lysopc 16:2 (2N Isomer)	ÈÜÑªÁ×Ö¬õ£µ¨¼î16:2	11.13	C24H46NO7P	491.308	Phospholipid	Á×Ö¬		5236	12050	6668	9995	9443	6773	0.913891114417611	-0.129905809306	0.648850173749132	0.666666666666667	0.440931931145887
Com_301_pos	Lysopc 15:0	ÈÜÑªÁ×Ö¬õ£µ¨¼î15:0	12.93	C23H48NO7P	481.317	Phospholipid	Á×Ö¬		281000	463800	512100	449500	1281000	359900	0.60127248373517	-0.733909157453	0.4504316331459	0.444444444444444	1.09145195720454
Com_302_pos	Lysopc 16:0	ÈÜÑªÂÑÁ×Ö¬õ£µ¨¼î16:0(2nÒì¹¹)	12.57	C24H50NO7P	495.63	Phospholipid	Á×Ö¬		4517000	4011000	4801000	2665000	7009000	2161000	1.12623574144487	0.171508841109	0.554390149928135	0.666666666666667	0.746626962144569
Com_303_pos	Lysopc 18:2	ÈÜÑªÂÑÁ×Ö¬õ£µ¨¼î18:2	12.16	C26H50NO7P	519.65	Phospholipid	Á×Ö¬		4597000	8962000	5546000	5433000	5498000	3264000	1.3458964424093	0.428567408633	0.341954726711838	0.777777777777778	1.04896031028288
Com_304_pos	Lysopc 18:3	ÈÜÑªÁ×Ö¬õ£µ¨¼î18:3	12.57	C26H48NO7P	517.317	Phospholipid	Á×Ö¬		1658000	1493000	1799000	928200	2839000	803100	1.08307988534669	0.115139656559	0.598739801697756	0.666666666666667	0.711108213930156
Com_305_pos	Lysopc 17:0	ÈÜÑªÁ×Ö¬õ£µ¨¼î17:0	13.17	C25H52NO7P	509.657	Phospholipid	Á×Ö¬	"50930-23-9"	21460	37110	40370	23730	45460	16240	1.15814116820789	0.21181111711	0.608363147845291	0.555555555555556	0.748767739477741
Com_306_pos	Lysopc 18:1	ÈÜÑªÂÑÁ×Ö¬õ£µ¨¼î18:1	12.9	C26H52NO7P	521.667	Phospholipid	Á×Ö¬	"3542-29-8"	3055000	6698000	4143000	5657000	5105000	2993000	1.01025081788441	0.0147135195068	0.98397334987101	0.444444444444444	0.144858916449441
Com_307_pos	Lysine Butyrate	Àµ°±Ëá¶¡Ëá	0.9	C10H22N2O4	234.293	Amino Acid And Its Derivatives	°±»ùËá¼°ÆäÑÜÉúÎï	"80407-71-2"	3572000	6554000	9126000	3069000	5948000	8404000	1.10510303656507	0.144180888541	0.797971454441623	0.666666666666667	0.501305958343041
Com_308_pos	Lysopc 14:0	ÈÜÑªÂÑÁ×Ö¬õ£µ¨¼î14:0	11.37	C22H46NO7P	467.577	Phospholipid	Á×Ö¬	"20559-16-4"	48540	58860	60480	24450	58930	20010	1.6237547151562	0.699333715064	0.21008377762413	0.777777777777778	1.2761745649157
Com_309_pos	Isovalerylcarnitine	ÒìÎìÈâ¼î	5.66	C12H23NO4	245.32	Carnitine	Èâ¼îÀà	"31023-24-2"	3168000	2376000	1560000	1666000	2801000	2621000	1.00225733634312	0.00325297779509	0.961345816933046	0.555555555555556	0.0574961768161136
Com_30_neg	Nonadecanoic acid	ÕýÌ¼Ê®¾ÅËá	18.28	C19H38O2	298.5	Fatty Acyls	Ö¬·¾õ£Àà	"646-30-0"	650700	657000	513500	904300	829800	739100	0.736373928513666	-0.441489546241	0.0408823814328337	1	1.66340883472245
Com_310_pos	3-Hydroxy-butyryl carnitine	3-ôÇ»ù¶¡õ£»ùÈâ¼î	1.91	C11H21NO5	247.291	Carnitine	Èâ¼îÀà	"1469900-92-2"	825400	165500	195200	1326000	2091000	659400	0.290967520361103	-1.78106997553	0.0926568978601657	0.888888888888889	1.93207457674549
Com_311_pos	Arachidonoylcarnitine	»¨ÉúËÄÏ©ËáÈâ¼î	11.42	C27H46NO4	448.668	Carnitine	Èâ¼îÀà	"36816-11-2"	301100	263700	179100	296600	156700	204100	1.13157894736842	0.178337241259	0.607557560947222	0.666666666666667	0.834781831828467
Com_312_pos	Carnitine-C3	Èâ¶¾¼î-C3	2.56	C10H17NO4	217.3	Carnitine	Èâ¼îÀà		6429000	3999000	2777000	2148000	2858000	4814000	1.34470468431772	0.427289371852	0.434657459479438	0.666666666666667	1.01711224873141
Com_313_pos	Carnitine-C4	Èâ¶¾¼î-C4	4.63	C11H21NO4	231.3	Carnitine	Èâ¼îÀà		18750000	9233000	11730000	25420000	16140000	8980000	0.78577364463791	-0.347814315215	0.619698217352963	0.555555555555556	0.731288236142768
Com_314_pos	Cycloleucine	»·ÁÁ°±Ëá	0.84	C6H11NO2	129.157	Amino Acid And Its Derivatives	°±»ùËá¼°ÆäÑÜÉúÎï	"52-52-8"	19470000	30860000	30100000	21490000	22150000	27350000	1.13297647555994	0.18011790622	0.560574012180918	0.666666666666667	0.821258857439695
Com_315_pos	cis-gondoic acid	»¨ÉúÓÍËá	16.03	C20H38O2	310.515	Fatty Acyls	Ö¬·¾õ£Àà	"26764-41-0"	311700	579600	545300	1409000	532400	583700	0.56892796324898	-0.813682102536	0.259396043885307	0.777777777777778	1.29203097497104
Com_316_pos	Pantethine	D-·ºÁòÒÒ°·	0.85	C22H42N4O8S2	554.721	Amino Acid And Its Derivatives	°±»ùËá¼°ÆäÑÜÉúÎï	"16816-67-4"	4803	11724	11808	7817	12670	10030	0.928498869482583	-0.107027941316	0.713453675114748	0.444444444444444	0.795717166834927
Com_317_pos	D-Myo-inositol 4,5-bisphosohate	D-ÏËÎ¬´¼-4,5-¶þÁ×Ëá	0.97	C6H14O12P2	340.116	Alcohols and polyols	´¼Àà¼°Æä¶àÔª´¼	"47055-78-7"	151100	115200	105600	124500	187100	93060	0.919043147333564	-0.121795499986	0.825870296647192	0.555555555555556	0.284964582353194
Com_318_pos	Glu-Glu	¹È°±õ£-¹È°±Ëá	1.0	C10H16N2O7	276.243	Amino Acid And Its Derivatives	°±»ùËá¼°ÆäÑÜÉúÎï	"3929-61-1"	204300	69430	93330	335900	341100	131300	0.454113571693678	-1.13887494092	0.14684807860036	0.888888888888889	1.07462765400818
Com_319_pos	Ectoine	ÒÀ¿Ë¶àÒò	0.95	C6H10N2O2	142.156	Others	ÆäËü	"96702-03-3"	525400	483600	479400	909700	625000	724500	0.658817280453258	-0.602049698145	0.0568358045207775	1	0.79663409126113
Com_31_neg	Monobutyl phthalate	ÁÚ±½¶þ¼×Ëáµ¥¶¡õ¥	9.719	C12H14O4	222.24	Organic Acid And Its Derivatives	ÓÐ»úËá¼°ÆäÑÜÉúÎï	"131-70-4"	147100	157900	152500	140100	162400	154200	1.00175169695643	0.00252495368042	0.951253232766972	0.555555555555556	0.574809135864925
Com_320_pos	Cadaverine	1,5-¶þ°±»ùÎìÍé	0.706	C5H14N2	102.18	Polyamine	¶à°·	"462-94-2"	12420	16670	6926	7677	7330	5331	1.77087225882584	0.824460147604	0.169952478914677	0.777777777777778	1.48617174790532
Com_321_pos	N-Acetylneuraminic acid	N-ÒÒõ£Éñ¾­°±Ëá	0.988	C11H19NO9	309.27	Amino Acid And Its Derivatives	°±»ùËá¼°ÆäÑÜÉúÎï	"131-48-6"	118400	50830	53100	92500	75090	52500	1.01017765459585	0.0146090344285	0.898913220855265	0.555555555555556	0.414434714899517
Com_322_pos	Palmitoylethanolamide	×ØéµÒÒ´¼°·	14.399	C18H37NO2	299.49	Organic Acid And Its Derivatives	ÓÐ»úËá¼°ÆäÑÜÉúÎï	"544-31-0"	28850	37540	32390	24410	39190	32840	1.02426379095811	0.0345873177759	0.830175947432443	0.555555555555556	0.567018805931217
Com_323_pos	Dehydrocholic acid	¶ìÈ¥Çâµ¨Ëá	12.273	C24H34O5	402.52	Bile Acids	µ¨Ö­Ëá	"81-23-2"	10920	9693	6498	12790	8999	12170	0.798345063164404	-0.324915647543	0.290901451480484	0.777777777777778	1.07559403595439
Com_324_pos	Uracil	Äòà×à¤	1.47	C4H4N2O2	112.09	Nucleotide And Its Derivates	ºËÜÕËá¼°ÆäÑÜÉúÎï	"66-22-8"	130945	120300	229500	117300	141000	108547	1.31047821026204	0.390093365717	0.372599642999639	0.777777777777778	1.13673444933059
Com_325_pos	Estradiol Benzoate	±½¼×Ëá´Æ¶þ´¼	14.023	C25H28O3	376.49	Hormones	¼¤ËØ	"50-50-0"	9351	2866	1792	3711	10704	2531	0.826684763365986	-0.274590798174	0.725894651318779	0.666666666666667	0.419748817134686
Com_326_pos	L-Tryptophan	L-É«°±Ëá	4.894	C11H12N2O2	204.23	Amino Acid And Its Derivatives	°±»ùËá¼°ÆäÑÜÉúÎï	"73-22-3"	44700000	32490000	40090000	40080000	43860000	31420000	1.01664355062413	0.023813938893	0.903972999720993	0.666666666666667	0.171727279233785
Com_327_pos	Erucamide	½æËáõ£°·	16.97	C22H43NO	337.6	Fatty Acyls	Ö¬·¾õ£Àà	"112-84-5"	48040000	48980000	44610000	45570000	46870000	47120000	1.01483233018057	0.0212413861308	0.680458727628264	0.666666666666667	0.268214103790627
Com_328_pos	Hexadecanamide	Ê®ÁùÌ¼õ£°·	14.82	C16H33NO	255.44	Fatty Acyls	Ö¬·¾õ£Àà	"629-54-9"	12020000	18830000	18050000	40220000	18470000	20420000	0.61812665908229	-0.694025606746	0.213970470492253	0.888888888888889	1.39818414282169
Com_329_pos	N-Lauryldiethanolamine	Ê®¶þÍé»ùÒÒ´¼°·	9.45	C16H35NO2	273.45	Amines	°·Àà	"1541-67-9"	27120	26980	25190	27060	24760	26000	1.01888974556669	0.0269979453899	0.619733780650116	0.666666666666667	0.383943537403715
Com_32_neg	D-Ribose	D-ºËÌÇ	0.92	C5H10O5	150.13	Carbohydrates And Its Derivatives	ÌÇÀà¼°ÆäÑÜÉúÎï	"50-69-1"	68100	65870	48390	45920	76290	62960	0.984824755629962	-0.022061067452	0.978356757728682	0.555555555555556	0.188541274471151
Com_330_pos	2-Aminoethylphosphonate	2-°±»ùÒÒ»ùÁ×Ëáõ¥	0.98	C2H8NO3P	125.06	Organic Acid And Its Derivatives	ÓÐ»úËá¼°ÆäÑÜÉúÎï	"2041-14-7"	993600	718100	874500	1024000	968900	937700	0.88248140312564	-0.180362218658	0.291921526671664	0.777777777777778	1.03525928698838
Com_331_pos	6-Methylmercaptopurine	6-¼×»ùÛÏàÑßÊ	4.04	C6H6N4S	166.21	Purines and purine derivatives	àÑßÊ¼°ÆäÑÜÉúÎï	"50-66-8"	8590000	5758000	9444000	7900000	9365000	7431000	0.963394881762229	-0.0538008355627	0.767354170930409	0.555555555555556	0.252316476949391
Com_332_pos	2-Hydroxycinnamate	2-ôÇ»ùÈâ¹ðËá	1.81	C9H8O3	164.16	Cinnamic acids and derivatives	Èâ¹ðËá¼°ÆäÑÜÉúÎï	"614-60-8"	2618000	2964000	3231000	2855000	3509000	2192000	1.03003740065451	0.0426967226116	0.787986395567879	0.555555555555556	0.210360799649031
Com_333_pos	Piperidine	ßßà¤	2.04	C5H11N	85.15	Organoheterocyclic compounds	ÓÐ»úÔÓ»·»¯ºÏÎï	"110-89-4"	446200	193100	573400	465800	592400	349300	0.861598579040852	-0.214912224314	0.585069742924588	0.666666666666667	0.592822180655516
Com_334_pos	Isoquinoline	Òìà­ßø	4.9	C9H7N	129.16	Organoheterocyclic compounds	ÓÐ»úÔÓ»·»¯ºÏÎï	"119-65-3"	31070	22370	23700	31230	33530	24430	0.864895167619688	-0.209402818	0.352319629556053	0.888888888888889	0.755521664220882
Com_335_pos	Purine	àÑßÊ	4.1	C5H4N4	120.112	Nucleotide And Its Derivates	ºËÜÕËá¼°ÆäÑÜÉúÎï	"120-73-0"	42370	35150	49680	41040	53730	42670	0.925494761350407	-0.111703270967	0.573756254424919	0.666666666666667	0.470264701290183
Com_336_pos	S-Methyl-5'-thioadenosine	S-¼×»ù-5'-ÁòÏÙàÑßÊ	4.94	C11H15N5O3S	297.333	Nucleotide And Its Derivates	ºËÜÕËá¼°ÆäÑÜÉúÎï		856400	726500	823900	898700	1088000	743800	0.8814502838308	-0.182048894932	0.409547237286901	0.777777777777778	1.00342788197502
Com_337_pos	Isobutyrylglycine	2-(Òì¶¡»ù°±»ù)ÒÒËá	0.63	C6H11NO3	145.156	Organic Acid And Its Derivatives	ÓÐ»úËá¼°ÆäÑÜÉúÎï	"15926-18-8"	12300000	13590000	12800000	9476000	11510000	11250000	1.20021094428589	0.263287990442	0.0760669139950857	1	1.04923176671708
Com_338_pos	(5-L-Glutamyl)-L-Amino Acid	5-L-¹È°±õ£-L-±û°±Ëá	1.18	C8H14N2O5	218.207	Amino Acid And Its Derivatives	°±»ùËá¼°ÆäÑÜÉúÎï	"5875-41-2"	453300	679400	585000	1135000	569900	956100	0.645509207065013	-0.631490421675	0.17794810273669	0.777777777777778	0.624227834441022
Com_339_pos	Fexofenadine	·ÇË÷·ÇÄÇ¶¨	12.04	C32H39NO4	501.656	Others	ÆäËü	"83799-24-0"	679500	1246000	809600	706600	809600	490200	1.36318779904306	0.446984328163	0.274564085665534	0.722222222222222	1.1142441175797
Com_33_neg	2-Hydroxy-3-methylbutanoic acid	2-ôÇ»ù-3-¼×»ù¶¡Ëá	4.932	C5H10O3	118.13	Fatty Acyls	Ö¬·¾õ£Àà	"4026-18-0"	183400	224700	285700	266300	353300	237900	0.809096209912537	-0.305616830661	0.286121165340683	0.777777777777778	1.15594371894875
Com_340_pos	Feruloylcholine	°¢Îºõ£µ¨¼î	14.42	C15H22NO4	280.34	Cholines	µ¨¼îÀà		581400	703900	781500	1016000	734100	708100	0.840777804897893	-0.250203509777	0.314119941601082	0.777777777777778	1.15863544762019
Com_341_pos	Gly-Phe	¸Ê°±õ£-±½±û°±Ëá	4.88	C11H14N2O3	222.24	Amino Acid And Its Derivatives	°±»ùËá¼°ÆäÑÜÉúÎï	"3321-03-7"	297200	179400	474600	163400	232900	147000	1.75078225658016	0.807999668074	0.209154391703045	0.888888888888889	1.41152248302798
Com_342_pos	Glycerol 1-hexadecanoate	µ¥×ØéµËá¸ÊÓÍõ¥	13.72	C19H38O4	330.503	Glycerolipids	¸ÊÓÍÖ¬Àà	"542-44-9"	29210	35370	23430	24860	19700	33050	1.13400335008375	0.18142490231	0.523306705690723	0.666666666666667	0.463774212333187
Com_343_pos	gamma-Muurolene	¦Ã-Ä¾ÂÞÏ©	4.87	C15H24	204.351	Fatty Acyls	Ö¬·¾õ£Àà	"24268-39-1"	244700	187700	222100	222900	234100	183800	1.02137952559301	0.0305190444239	0.85701773013287	0.444444444444444	0.162096767435642
Com_344_pos	Galactinol	¼¡´¼°ëÈéÌÇÜÕ	0.95	C12H22O11	342.297	Carbohydrates And Its Derivatives	ÌÇÀà¼°ÆäÑÜÉúÎï	"3687-64-7"	76420	92160	60720	83630	21500	64470	1.35200471698113	0.435100185018	0.407884284815424	0.666666666666667	1.00712120958073
Com_345_pos	Flavin Adenine Dinucleotide	»ÆËØÏÙàÑßÊ¶þºËÜÕËá	5.14	C27H33N9O15P2	785.55	Nucleotide And Its Derivates	ºËÜÕËá¼°ÆäÑÜÉúÎï	"146-14-5"	23050	17990	18140	24290	21950	15340	0.961026307242611	-0.0573521708509	0.873055024453334	0.555555555555556	0.466014747270964
Com_346_pos	3-Hydroxy-3-Methylpentane-1,5-Dioic Acid	3-ôÇ»ù-3-¼×»ù¹È°±Ëá	0.87	C6H10O5	162.14	Fatty Acyls	Ö¬·¾õ£Àà	"503-49-1"	3151000	3512000	2554000	2446000	2690000	4046000	1.00381180570682	0.00548881866825	0.91838883573622	0.555555555555556	0.135923247469697
Com_347_pos	Oxidized glutathione	Ñõ»¯¹Èë×¸ÊëÄ	1.78	C20H32N6O12S2	612.6	Amino Acid And Its Derivatives	°±»ùËá¼°ÆäÑÜÉúÎï	"121-24-4"	183400	303400	216000	442500	763900	109100	0.534245534017484	-0.904425152045	0.58940109042435	0.666666666666667	0.766503254004638
Com_348_pos	7,8-Dihydrofolate	7,8-¶þÇâÒ¶Ëá	0.8	C19H21N7O6	443.41	Organic Acid And Its Derivatives	ÓÐ»úËá¼°ÆäÑÜÉúÎï	"4033-27-6"	20430	12700	23060	14430	16950	17470	1.15025588536336	0.201954838108	0.607898891781175	0.666666666666667	0.261960094420527
Com_349_pos	6-Deoxy-D-glucose	6-ÍÑÑõ-D-ÆÏÌÑÌÇ	1.825	C6H12O5	164.156	Carbohydrates And Its Derivatives	ÌÇÀà¼°ÆäÑÜÉúÎï	"7658-08-4"	541000	518300	587600	535900	676500	401500	1.02044736352934	0.029201767541	0.812802362522102	0.555555555555556	0.163664778470169
Com_34_neg	orotidine-5-phosphate	ÈéÇåËáºËÜÕ-5-Á×Ëá	2.75	C10H13N2O11P	368.19	Nucleotide And Its Derivates	ºËÜÕËá¼°ÆäÑÜÉúÎï		804500	1023000	419600	165100	818300	631900	1.39113477372624	0.476262195558	0.467547180892561	0.666666666666667	0.966621824918223
Com_350_pos	5-Aminopentanoate	5-°±»ùÎìËá	0.96	C5H11NO2	117.146	Organic Acid And Its Derivatives	ÓÐ»úËá¼°ÆäÑÜÉúÎï	"660-88-8"	94610	243400	178200	193200	144100	297700	0.812929133858268	-0.29879850235	0.541090135020315	0.666666666666667	0.712676306178809
Com_351_pos	5-Hydroxylysine	5-ôÇ»ùÀµ°±Ëá	0.72	C6H15ClN2O3	198.65	Amino Acid And Its Derivatives	°±»ùËá¼°ÆäÑÜÉúÎï	"13204-98-3"	95480	109300	129700	97990	89920	103700	1.14701141936148	0.19787975454	0.277877344593851	0.777777777777778	0.884573946594364
Com_352_pos	5-Methoxyindole-3-acetic acid	5-¼×Ñõ»ùßÅßá-3-ÒÒËá	4.87	C11H11NO3	205.21	Indole And Its Derivatives	ßÅßá¼°ÆäÑÜÉúÎï	"3471-31-6"	495400	338000	435800	439500	449700	360300	1.01576630652261	0.0225685249436	0.954474887392833	0.555555555555556	0.208502558147062
Com_353_pos	Pyridoxamine	ßÁ¶ß°·	1.0	C8H12N2O2	168.193	Pyridine And Its Derivatives	ßÁà¤¼°ÆäÑÜÉúÎï	"85-87-0"	63070	105500	89360	61920	84740	83380	1.12123978438532	0.165094840811	0.609510711885809	0.777777777777778	0.611829903180529
Com_354_pos	5beta-Androstan-17beta-ol-3-one	5¦Â-ÐÛçÞÍé-17¦Â-´¼-3-Íª	0.84	C19H30O2	290.44	Hormones	¼¤ËØ	"571-22-2"	902800	781100	722600	815100	949600	874200	0.911933002387358	-0.133000258078	0.304668500678022	0.777777777777778	0.917910293326183
Com_355_pos	Etiocholanolone	3a-ôÇ»ù-5b-ÐÛçÞÍé-17-Íª	0.68	C19H30O2	290.44	Hormones	¼¤ËØ	"53-42-9"	310600	324300	275900	312200	347000	336700	0.914549653579677	-0.128866594647	0.202353666392546	0.888888888888889	0.875912389118248
Com_356_pos	5beta-Androstan-3beta-ol-17-one	5¦Â-ÐÛçÞÍé-3¦Â-ôÇ»ù-17Íª	0.68	C19H30O2	290.44	Hormones	¼¤ËØ	"571-31-3"	281300	280800	207000	278100	274900	280000	0.92328931572629	-0.115145302963	0.471375644290902	0.666666666666667	0.686238173946386
Com_357_pos	Sarcosine	¼¡°±Ëá	0.9	C3H7NO2	89.093	Amino Acid And Its Derivatives	°±»ùËá¼°ÆäÑÜÉúÎï	"107-97-1"	17510000	17280000	19780000	21630000	17520000	18320000	0.949538889855577	-0.0747010054628	0.561177314239115	0.777777777777778	0.485066197870747
Com_358_pos	S-Adenosyl-methionine	S-ÏÙÜÕ-¼×Áò°±Ëá	0.84	C22H30N6O8S2	570.639	Amino Acid And Its Derivatives	°±»ùËá¼°ÆäÑÜÉúÎï	"17176-17-9"	4266000	4233000	5001000	5630000	5768000	4332000	0.858232676414495	-0.220559263477	0.253034470126072	0.888888888888889	1.100478950739
Com_359_pos	Vitamin B2	ºË»ÆËØB2	5.94	C17H20N4O6	376.364	Vitamins	Î¬ÉúËØ	"83-88-5"	51520	49980	48520	42040	51500	44500	1.08678643871342	0.120068468351	0.285865701765804	0.777777777777778	1.18936883923557
Com_35_neg	2-Oxoadipic acid	2-Ñõ´ú¼º¶þËá	8.05	C6H8O5	160.125	Organic Acid And Its Derivatives	ÓÐ»úËá¼°ÆäÑÜÉúÎï	"3184-35-8"	1896000	1847000	1927000	1839000	1037000	1926000	1.18075801749271	0.239713331599	0.415711878788393	0.777777777777778	0.885963431025756
Com_360_pos	R-Aminobutyrate	R-3-°±»ù¶¡Ëá	0.91	C4H9NO2	103.12	Organic Acid And Its Derivatives	ÓÐ»úËá¼°ÆäÑÜÉúÎï	"3775-73-3"	65740	89590	90590	93490	57090	52280	1.21226461599132	0.277704648076	0.373049109283814	0.666666666666667	0.865761179029577
Com_361_pos	S-ribosyl-L-homocysteine	S-ºËÌÇ»ù-L-Í¬ÐÍ°ëë×°±Ëá	3.14	C9H17NO6S	267.3	Amino Acid And Its Derivatives	°±»ùËá¼°ÆäÑÜÉúÎï		334900	253800	256100	281300	307600	276900	0.975744975744976	-0.0354239658539	0.766455079657461	0.666666666666667	0.509831953618628
Com_362_pos	Spermidine	ÑÇ¾«°·	0.68	C7H19N3	145.246	Polyamine	¶à°·	"124-20-9"	3686000	4301000	3818000	2684000	3664000	3780000	1.16558056872038	0.221048731688	0.274054237063187	0.888888888888889	0.925147078059856
Com_363_pos	5-Aminolevulinate	5-°±»ùÒÒõ£±ûËá	2.07	C5H9NO3	131.13	Organic Acid And Its Derivatives	ÓÐ»úËá¼°ÆäÑÜÉúÎï	"106-60-5"	240400	121800	342800	236100	342700	222100	0.880259707828693	-0.183998862138	0.603440118473006	0.555555555555556	0.587033095381475
Com_364_pos	5-Aminosalicylate	5-°±»ùË®ÑîËá	1.68	C7H7NO3	153.135	Organic Acid And Its Derivatives	ÓÐ»úËá¼°ÆäÑÜÉúÎï	"89-57-6"	402400	628800	767300	424000	608100	676500	1.05261617698701	0.0739794719741	0.888331641545457	0.555555555555556	0.450490781366093
Com_365_pos	N-(5-Aminopentyl)acetamide	N-(5-°±»ùÎì»ù)ÒÒõ£°·	1.01	C7H16N2O	144.21	Polyamine	¶à°·	"32343-73-0"	39530	23730	16370	31910	24370	33810	0.883893883893884	-0.178054917996	0.566973493218778	0.666666666666667	0.689940371592537
Com_366_pos	H-Trp-NH2.HCl	L-É«°±õ£°·ÑÎËáÑÎ	4.587	C11H14ClN3O	239.7	Amino Acid And Its Derivatives	°±»ùËá¼°ÆäÑÜÉúÎï	"5022-65-1"	23750	36870	69040	53230	67900	111300	0.557845372800413	-0.842062812992	0.178318712314405	0.777777777777778	1.14197345420264
Com_367_pos	Methylguanidine HCl	1-¼×»ùëÒÑÎËáÑÎ	0.88	C2H8ClN3	109.56	Organic Acid And Its Derivatives	ÓÐ»úËá¼°ÆäÑÜÉúÎï	"21770-81-0"	95170	52530	127400	129400	167600	160700	0.601048721870221	-0.734446152284	0.152888541117519	1	1.59923282839979
Com_368_pos	beta-Alanine methyl ester	3-°±»ù±ûËá¼×õ¥	0.98	C4H9NO2	103.12	Amino Acid And Its Derivatives	°±»ùËá¼°ÆäÑÜÉúÎï	"4138-35-6"	394300	554100	522900	533300	368600	284100	1.24055649241147	0.310987434115	0.335455619016483	0.777777777777778	1.05805950414303
Com_369_pos	Dihydrouracil	¶þÇâÄòà×à¤	6.15	C4H6N2O2	114.103	Pyrimidines and pyrimidine derivatives	à×à¤¼°ÆäÑÜÉúÎï	"504-07-4"	21180	13270	44730	15680	22170	28320	1.19661478011183	0.258958787813	0.849541207735451	0.555555555555556	0.248418205413557
Com_36_neg	Phosphonotyrosine	O-Á×ËáÀÒ°±Ëá	0.94	C9H12NO6P	261.168	Amino Acid And Its Derivatives	°±»ùËá¼°ÆäÑÜÉúÎï	"21820-51-9"	89630	79870	95790	88470	98940	96940	0.932969931422543	-0.100097509509	0.334098090285123	0.777777777777778	0.435642210993132
Com_370_pos	Imidazoleacetic acid	ßäßòÒÒËá	0.91	C5H6N2O2	126.113	Organic Acid And Its Derivatives	ÓÐ»úËá¼°ÆäÑÜÉúÎï	"645-65-8"	3522000	804500	637100	2506000	4307000	2034000	0.561048943144569	-0.833801464959	0.256951084438041	0.777777777777778	1.31957508875105
Com_371_pos	1D-chiro-Inositol	D-ÊÖÐÔ¼¡´¼	18.32	C6H12O6	180.156	Phenols And Its Derivatives	·ÓÀà¼°ÆäÑÜÉúÎï	"643-12-9"	1452000	1474000	1532000	1356000	1391000	1478000	1.05514792899408	0.0774452752028	0.1607408785898	0.777777777777778	0.378633581137338
Com_372_pos	Isoproterenol	Òì±ûÉöÉÏÏÙËØ	8.36	C11H17NO3	211.258	Hormones	¼¤ËØ	"7683-59-2"	186000	181300	141800	156000	163000	167500	1.0464542651593	0.0655092605953	0.702904906045423	0.666666666666667	0.511978257505718
Com_373_pos	L-(-)-alpha-Amino-epsilon-Caprolactam	3-°±»ùÁùÇâ-2H-µªÔÓ×¿-2-Íª	0.7	C6H12N2O	128.172	Amino Acid And Its Derivatives	°±»ùËá¼°ÆäÑÜÉúÎï	"21568-87-6"	643800	488300	681700	1453000	542600	1018000	0.601871515795062	-0.732472553599	0.26251633020061	0.777777777777778	1.21658452295048
Com_374_pos	L-Alanyl-L-leucine	L-±û°±õ£-L-ÁÁ°±Ëá	4.45	C9H18N2O3	202.251	Amino Acid And Its Derivatives	°±»ùËá¼°ÆäÑÜÉúÎï	"3303-34-2"	580200	251700	643000	137600	312300	165200	2.39782149244025	1.26172426027	0.09240423257627	0.888888888888889	1.47937772344811
Com_375_pos	Ip7G	ÒìÎìÏ©»ù-7-ÆÏÌÇÜÕ	0.96	C16H23N5O5	365.384	Nucleotide And Its Derivates	ºËÜÕËá¼°ÆäÑÜÉúÎï	"59384-58-6"	18200	27230	14290	23320	11790	15260	1.18562636489974	0.245649434476	0.558488883430443	0.666666666666667	0.698582010610898
Com_376_pos	Isobutyryl carnitine	Òì¶¡õ£Èâ¼î	4.62	C11H21NO4	231.289	Carnitine	Èâ¼îÀà	"25518-49-4"	14980000	8072000	9626000	21540000	13820000	7665000	0.759511911679256	-0.396855503714	0.564316909519289	0.555555555555556	0.787704546931242
Com_377_pos	beta amino butyric acid	¦Â-°±»ù¶¡Ëá	0.98	C4H9NO2	103.12	Amino Acid And Its Derivatives	°±»ùËá¼°ÆäÑÜÉúÎï	"541-48-0"	476200	616600	748200	674500	410700	792000	0.980715959940337	-0.028092738791	0.998607432230628	0.555555555555556	0.0267329298272618
Com_378_pos	Adenine	ÏÙàÑßÊ	1.032	C5H5N5	135.127	Nucleotide And Its Derivates	ºËÜÕËá¼°ÆäÑÜÉúÎï	"73-24-5"	698500	572900	478400	4274000	2001000	2097000	0.209006211180124	-2.25838227839	0.0137748469561436	1	2.09374190562798
Com_379_pos	4-Pregnen-17alpha,20alpha-Diol-3-One	4-ÔÐÍé-17¦Á,20¦Á-¶þ´¼-3-Íª	0.87	C21H32O3	332.477	Hormones	¼¤ËØ	"652-69-7"	220500	166100	139700	153700	181400	180900	1.01996124031008	0.0285143291822	0.975838609721479	0.555555555555556	0.222080013948913
Com_37_neg	O-Desmethylnaproxen	(S)-2-(6-ôÇ»ù-2-ÝÁ)±ûËá	11.86	C13H12O3	216.233	Benzene and substituted derivatives	±½¼°ÆäÑÜÉúÎï	"52079-10-4"	18070	24050	23410	22190	26220	20980	0.944372387952154	-0.0825722349672	0.622136129771822	0.444444444444444	0.520400725757051
Com_380_pos	11-Ketoetiocholanolone	11-Íª±¾µ¨Íé´¼Íª	15.04	C19H28O3	304.424	Hormones	¼¤ËØ	"739-27-5"	103600	97960	100200	131600	124800	89280	0.872946077296922	-0.196035554915	0.421239891146611	0.666666666666667	0.593889905199636
Com_381_pos	H-Gly-Pro-OH	¸Ê°±õ£-L-¸¬°±Ëá	1.035	C7H12N2O3	172.18	Amino Acid And Its Derivatives	°±»ùËá¼°ÆäÑÜÉúÎï	"704-15-4"	228000	136700	328600	164700	170800	122700	1.51309471846355	0.597502301884	0.289539608205359	0.777777777777778	1.3519852073798
Com_382_pos	L-Homocitrulline	L-¸ß¹Ï°±Ëá	0.972	C7H15N3O3	189.21	Amino Acid And Its Derivatives	°±»ùËá¼°ÆäÑÜÉúÎï	"1190-49-4"	176800	184500	179300	156400	201800	203200	0.962949768436053	-0.0544675519778	0.756644327320764	0.666666666666667	0.366775558052943
Com_383_pos	Glycyl-L-leucine	N-¸Ê°±õ£-L-ÁÁ°±Ëá	4.466	C8H16N2O3	188.22	Amino Acid And Its Derivatives	°±»ùËá¼°ÆäÑÜÉúÎï	"869-19-2"	394900	301900	693400	240300	357200	227000	1.68611279563372	0.753701051261	0.181650633588392	0.888888888888889	1.26563985350354
Com_384_pos	5-Methylcytosine	5-¼×»ù°ûà×à¤	0.991	C5H7N3O	125.13	Nucleotide And Its Derivates	ºËÜÕËá¼°ÆäÑÜÉúÎï	"554-01-8"	539200	424900	545700	556100	575400	529100	0.909189449596531	-0.137347151936	0.340691567355533	0.777777777777778	0.823003020158946
Com_385_pos	D-Proline	D-¸¬°±Ëá	0.967	C5H9NO2	115.13	Amino Acid And Its Derivatives	°±»ùËá¼°ÆäÑÜÉúÎï	"344-25-2"	61310000	73130000	60960000	61530000	65110000	55780000	1.07115447867558	0.09916655623	0.424300590727033	0.444444444444444	0.274110834547448
Com_386_pos	L-Hydroxyproline	L-ôÇ¸¬°±Ëá	0.88	C5H9NO3	131.13	Amino Acid And Its Derivatives	°±»ùËá¼°ÆäÑÜÉúÎï	"51-35-4"	37260000	37050000	34490000	35470000	33360000	36690000	1.03108415466262	0.0441620868862	0.456657657359115	0.777777777777778	0.645774490188908
Com_387_pos	Glycyl-L-valine	¸Ê°±õ£-L-çÓ°±Ëá	2.077	C7H14N2O3	174.2	Amino Acid And Its Derivatives	°±»ùËá¼°ÆäÑÜÉúÎï	"1963-21-9"	286200	132000	392100	122700	206700	75400	2.00172924901186	1.00124685054	0.192737258771759	0.888888888888889	1.39330847112767
Com_388_pos	N6-Acetyl-L-lysine	N6-ÒÒõ£-L-Àµ°±Ëá	1.304	C8H16N2O3	188.22	Amino Acid And Its Derivatives	°±»ùËá¼°ÆäÑÜÉúÎï	"692-04-6"	1227000	579000	767600	710300	996200	1000000	0.950895991132459	-0.0726405469493	0.748079023231666	0.555555555555556	0.345486728955505
Com_389_pos	N,N-Dimethylglycine	N,N-¶þ¼×»ù¸Ê°±Ëá	0.9	C4H9NO2	103.12	Amino Acid And Its Derivatives	°±»ùËá¼°ÆäÑÜÉúÎï	"1118-68-9"	1863000	1868000	1543000	1546000	2108000	2151000	0.908527131782946	-0.138398495888	0.522380090748776	0.777777777777778	0.711542774263195
Com_38_neg	Nelarabine	ÄÎÀ­±õ	4.11	C11H15N5O5	297.267	Others	ÆäËü	"121032-29-9"	170600	190600	205800	160300	206800	221400	0.963466440101954	-0.0536936800962	0.801172623654979	0.666666666666667	0.647205197620921
Com_390_pos	Guanosine monophosphate	ÄñÜÕµ¥Á×Ëá	1.01	C10H14N5O8P	363.058	Nucleotide And Its Derivates	ºËÜÕËá¼°ÆäÑÜÉúÎï		14310000	13960000	21480000	980500	11720000	3617000	3.04887390838057	1.60827648635	0.159376745902195	1	1.65107468427032
Com_391_pos	Diethylglutarate	Îì¶þËá¶þÒÒõ¥	0.67	C9H16O4	188.105	Organic Acid And Its Derivatives	ÓÐ»úËá¼°ÆäÑÜÉúÎï	"818-38-2"	18220000	14190000	12580000	11380000	17060000	15330000	1.02787297235549	0.03966198294	0.864896021782225	0.444444444444444	0.229396887170295
Com_392_pos	5-Hydroxyindoleacetate	5-ôÇ»ùßÅßá-3-ÒÒËá	5.58	C10H9NO3	191.058	Indole And Its Derivatives	ßÅßá¼°ÆäÑÜÉúÎï	"54-16-0"	49300	44750	71710	36240	28970	29250	1.75481685369469	0.811320467536	0.0435200116723873	1	2.14581447154993
Com_393_pos	D-Phenylalanine	D-±½±û°±Ëá	4.106	C9H11NO2	165.19	Amino Acid And Its Derivatives	°±»ùËá¼°ÆäÑÜÉúÎï	"673-06-3"	210400000	141900000	228200000	192800000	224200000	182500000	0.968306922435363	-0.0464636865487	0.781019112786258	0.555555555555556	0.240586436466805
Com_394_pos	Uridine	ÄòÜÕ	1.86	C9H12N2O6	244.2	Nucleotide And Its Derivates	ºËÜÕËá¼°ÆäÑÜÉúÎï	"58-96-8"	497500	500100	512500	607600	460800	480500	0.974949964490929	-0.0365999148283	0.85516850887715	0.666666666666667	0.181673679029193
Com_395_pos	Adenosine	ÏÙÜÕ	2.762	C10H13N5O4	267.24	Nucleotide And Its Derivates	ºËÜÕËá¼°ÆäÑÜÉúÎï	"58-61-7"	2810000	3359000	337400	373900	8883000	5052000	0.454710005660813	-1.13698134469	0.675802956519517	0.777777777777778	0.556799543799161
Com_396_pos	Cytidine	°ûÜÕ	1.029	C9H13N3O5	243.22	Nucleotide And Its Derivates	ºËÜÕËá¼°ÆäÑÜÉúÎï	"65-46-3"	423800	653800	687600	636500	495600	429500	1.13037909836066	0.176806694413	0.587898625598594	0.666666666666667	0.56524629124193
Com_397_pos	SDMA	¶þ¼×»ù-L-¾«°±Ëá	0.913	C8H18N4O2	202.25	Amino Acid And Its Derivatives	°±»ùËá¼°ÆäÑÜÉúÎï	"30344-00-4"	310300	493700	451200	405100	281000	293200	1.2817318492801	0.358094467746	0.258603759770159	0.888888888888889	0.870391951279841
Com_398_pos	Glutathione	¹Èë×¸ÊëÄ	1.51	C10H17N3O6S	307.32	Amino Acid And Its Derivatives	°±»ùËá¼°ÆäÑÜÉúÎï	"70-18-8"	57640000	74310000	65730000	58470000	68240000	47370000	1.13556985294118	0.183416454078	0.367050078717585	0.666666666666667	0.874584451208022
Com_399_pos	16alpha-Hydroxytestosterone	16¦Á-ôÇØºçÞÍª	15.01	C19H28O3	304.424	Hormones	¼¤ËØ	"63-01-4"	70050	75320	54780	50340	80140	64810	1.0248860668749	0.0354635391058	0.850686034460498	0.555555555555556	0.281105513583389
Com_39_neg	N-Oleoyl Glycine	N-ÓÍõ£¸Ê°±Ëá	14.62	C20H37NO3	339.513	Organic Acid And Its Derivatives	ÓÐ»úËá¼°ÆäÑÜÉúÎï	"2601-90-3"	4844	4227	3459	3649	4920	4908	0.929732136232099	-0.105112971563	0.628872108706176	0.777777777777778	0.388071552408072
Com_3_neg	Indolelactate	3-ßÅßáÈéËá	6.93	C11H11NO3	205.21	Indole And Its Derivatives	ßÅßá¼°ÆäÑÜÉúÎï	"1821-52-9"	32820	16650	16820	20490	23910	15090	1.11430492519751	0.156144074576	0.798385771163117	0.444444444444444	0.483197434054084
Com_400_pos	11beta-Hydroxytestosterone	11¦Â-ôÇØºÍª	0.68	C19H28O3	304.424	Hormones	¼¤ËØ	"1816-85-9"	899700	836400	874300	1002000	957100	1037000	0.871265979106171	-0.198814884491	0.0121127832567792	1	1.46908354077754
Com_401_pos	10E,12Z-Octadecadienoic acid	10E,12Z-Ê®°ËÌ¼¶þÏ©Ëá	14.42	C18H32O2	280.445	Fatty Acyls	Ö¬·¾õ£Àà	"2420-56-6"	1999000	2754000	2594000	3591000	2579000	2377000	0.85959985959986	-0.21826284776	0.420971720883518	0.444444444444444	0.943742257261057
Com_402_pos	1,4-Dihydro-1-Methyl-4-Oxo-3-Pyridinecarboxamide	1,4-¶þÇâ-1-¼×»ù-4-Ñõ´ú-3-ßÁà¤¼×õ£°·	1.69	C7H8N2O2	152.151	Pyridine And Its Derivatives	ßÁà¤¼°ÆäÑÜÉúÎï	"769-49-3"	1209000	920800	2112000	944000	1451000	945500	1.2698099086963	0.34461254085	0.52989308019817	0.555555555555556	0.668662373425282
Com_403_pos	Nandrolone	19-È¥¼×ØºÍª	9.45	C18H26O2	274.398	Hormones	¼¤ËØ	"434-22-0"	503400	686700	445400	522200	645800	841200	0.814005574357953	-0.296889420702	0.341434019687157	0.777777777777778	1.16959710529665
Com_404_pos	1-(4-Methoxyphenyl)-2-propanone	1-(4-¼×Ñõ»ù±½»ù)-2-±ûÍª	1.81	C10H12O2	164.201	Benzene and substituted derivatives	±½¼°ÆäÑÜÉúÎï	"122-84-9"	895400	1090000	1129000	919600	1318000	811000	1.02158367775372	0.0308073798284	0.830104261921119	0.555555555555556	0.337533627035904
Com_405_pos	Lysopc 20:4	ÈÜÑªÁ×Ö¬õ£µ¨¼î20:4	12.9	C28H50NO7P	543.681	Phospholipid	Á×Ö¬		1052000	2472000	1595000	1826000	1898000	1147000	1.05091357010881	0.0716440231509	0.96433082050046	0.555555555555556	0.274485191916937
Com_406_pos	cAMP	»·ÏÙÜÕËá	1.74	C10H12N5O6P	329.206	Nucleotide And Its Derivates	ºËÜÕËá¼°ÆäÑÜÉúÎï	"60-92-4"	141200	151400	96810	150600	237200	163000	0.706989832970225	-0.500238626711	0.155439950346424	0.888888888888889	1.65490724776576
Com_407_pos	N-Acetyl-aspartic acid	N-ÒÒõ£-Ìì¶¬°±Ëá	1.37	C6H9NO5	175.139	Amino Acid And Its Derivatives	°±»ùËá¼°ÆäÑÜÉúÎï		215200	331800	239400	399100	282600	345900	0.765278318411833	-0.38594356856	0.174094973032692	0.888888888888889	1.32039781787459
Com_408_pos	Benzamidine Hydrochloride Hydrate	±½¼×ëß	4.09	C7H11ClN2O	174.628	Benzene and substituted derivatives	±½¼°ÆäÑÜÉúÎï	"206752-36-5"	643600	443200	701400	627300	727200	556600	0.93569148657841	-0.0958951678055	0.653996817324775	0.444444444444444	0.349003402036059
Com_409_pos	Mag (18:1)	µ¥õ£¸ÊÓÍõ¥(õ£»ù18:1)	15.23	C21H40O4	356.2	Glycerolipids	¸ÊÓÍÖ¬Àà		26060	27690	30580	12590	44440	25210	1.02541342412451	0.0362056899076	0.723124718942013	0.666666666666667	0.633123869314199
Com_40_neg	Carbamoylphosphate	°±¼×»ùõ£Á×Ëá	0.86	CH2NO5P--	139.004	Organic Acid And Its Derivatives	ÓÐ»úËá¼°ÆäÑÜÉúÎï	"590-55-6"	639200	1097000	1506000	994800	505200	650300	1.50778961075199	0.592435136365	0.290737457882086	0.777777777777778	0.98551615870658
Com_410_pos	L-beta-Imidazolelactic acid	L-¦Â-ßäßòÈéËá	0.83	C6H8N2O3	156.139	Carbohydrates And Its Derivatives	ÌÇÀà¼°ÆäÑÜÉúÎï	"14403-45-3"	972300	1462000	1148000	1357000	1614000	1207000	0.857419818094782	-0.22192633141	0.336948844644868	0.777777777777778	1.15064753290389
Com_411_pos	L-Octanoylcarnitine	ÐÁõ£Èâ¼î	7.95	C15H29NO4	287.395	Carnitine	Èâ¼îÀà	"25243-95-2"	712700	415700	233900	581000	602700	470900	0.823340988758612	-0.280438044669	0.466188072382861	0.666666666666667	0.887904404373609
Com_412_pos	Hexanoylcarnitine	¼ºõ£Èâ¼î	6.6	C13H25NO4	259.34	Carnitine	Èâ¼îÀà	"22671-29-0"	3872000	1981000	2160000	4549000	3932000	2046000	0.761185522941009	-0.393679971767	0.461029271147387	0.777777777777778	0.897899118821434
Com_413_pos	D-Ala-D-Ala	D-±û°±õ£-D-±û°±Ëá	0.95	C6H12N2O3	160.171	Amino Acid And Its Derivatives	°±»ùËá¼°ÆäÑÜÉúÎï	"923-16-0"	4658000	7653000	7172000	10420000	5822000	11240000	0.708936758605633	-0.4962711587	0.281459849932174	0.777777777777778	0.492336018765247
Com_414_pos	D-Galactosamine	2-°±»ù-2-ÍÑÑõ-D-°ëÈéÌÇ	0.71	C6H14ClNO5	215.632	Carbohydrates And Its Derivatives	ÌÇÀà¼°ÆäÑÜÉúÎï	"1772-03-8"	293600	267500	286900	259200	323400	292700	0.968810693476522	-0.0457133056805	0.714036439287294	0.555555555555556	0.350753274271723
Com_415_pos	8-Bromoguanosine	8-äåÄñÜÕ	0.98	C10H12BrN5O5	362.137	Nucleotide And Its Derivates	ºËÜÕËá¼°ÆäÑÜÉúÎï	"4016-63-1"	28560	15070	33330	16550	24010	29480	1.09880068532267	0.135929715336	0.831962035286281	0.555555555555556	0.274037186721981
Com_416_pos	Carnosine	¼¡ëÄ	0.76	C9H14N4O3	226.232	Organic Acid And Its Derivatives	ÓÐ»úËá¼°ÆäÑÜÉúÎï	"305-84-0"	112600000	168800000	127200000	143400000	197700000	141800000	0.846137916752951	-0.241035259439	0.355055826220759	0.777777777777778	1.09838576591202
Com_417_pos	N-Acetyl-L-glutamic acid	N-ÒÒõ£-L-¹È°±õ£°·	0.71	C7H11NO5	189.166	Amino Acid And Its Derivatives	°±»ùËá¼°ÆäÑÜÉúÎï	"1188-37-0"	9281000	7663000	7567000	8190000	8931000	8872000	0.942984649713384	-0.0846938085709	0.454807256174368	0.666666666666667	0.974307264854501
Com_418_pos	N4-Acetylcytidine	N-ÒÒõ£°ûà×à¤	4.38	C11H15N3O6	285.253	Nucleotide And Its Derivates	ºËÜÕËá¼°ÆäÑÜÉúÎï	"3768-18-1"	8266	11270	11900	6776	14060	12400	0.94584185822602	-0.0803291052181	0.93841672621399	0.666666666666667	0.531393590441005
Com_419_pos	Metanephrine	¼ä¼×ÉöÉÏÏÙËØ	15.12	C10H15NO3	197.231	Phenols And Its Derivatives	·ÓÀà¼°ÆäÑÜÉúÎï	"5001-33-2"	565300	761100	1211000	1140000	823300	753500	0.933966431095406	-0.0985573978031	0.714960205740583	0.555555555555556	0.461388812528835
Com_41_neg	Butylmalonic acid	¶¡»ù±û¶þËá	0.7	C7H12O4	160.168	Organic Acid And Its Derivatives	ÓÐ»úËá¼°ÆäÑÜÉúÎï	"534-59-8"	33550000	32720000	30000000	29000000	34350000	31940000	1.01028439500472	0.0147614687281	0.857664676759042	0.555555555555556	0.246471544925152
Com_420_pos	Ethambutol	ÒÒ°·¶¡´¼	0.81	C10H24N2O2	204.31	Amines	°·Àà	"74-55-5"	25660	29490	34230	29300	65020	49320	0.622250069618491	-0.68443360827	0.199807368911383	0.777777777777778	1.32119113384459
Com_421_pos	Melamine	Èý¾ÛÇè°·	0.9	C3H6N6	126.12	Others	ÆäËü	"108-78-1"	81350	45952	57619	51150	56210	37470	1.27681419595388	0.352548597023	0.330805809311578	0.777777777777778	1.00247684167159
Com_422_pos	Tubercidin	É±½áºË¾úËØ	2.153	C11H14N4O4	266.25	Others	ÆäËü	"69-33-0"	18220	26080	18420	19740	13630	12550	1.36585365853659	0.44980291744	0.158677379056005	0.777777777777778	1.36139410889339
Com_423_pos	1,4-Naphthoquinone	1,4-ÝÁõ«	1.082	C10H6O2	158.153	Others	ÆäËü	"130-15-4"	1628000	1497000	1308000	1055000	1449000	1366000	1.14547803617571	0.195949796133	0.302363631310693	0.777777777777778	1.30217173010612
Com_424_pos	S-Lactoyglutathione	S-Èéõ£¹Èë×¸ÊëÄ	2.65	C13H21N3O8S	379.386	Amino Acid And Its Derivatives	°±»ùËá¼°ÆäÑÜÉúÎï	"25138-66-3"	37480	16800	6271	393700	61470	38030	0.122771695052717	-3.0259501084	0.114680607777698	1	1.51145827968674
Com_425_pos	All-cis-4,7,10,13,16-docosapentaenoic acid	¶þÊ®¶þÌ¼ÎåÏ©Ëá	13.78	C22H34O2	330.504	Fatty Acyls	Ö¬·¾õ£Àà	"25182-74-5"	33970	34030	29300	32590	51410	13700	0.995905834186284	-0.00591875718727	0.770770629672549	0.555555555555556	0.368847229689162
Com_426_pos	1,4-Diaminobutane	¸¯°·	0.699	C4H12N2	88.15	Polyamine	¶à°·	"110-60-1"	270300	452000	382500	440900	150900	119900	1.55233946887734	0.634444083628	0.277423283248938	0.777777777777778	1.43375917492749
Com_427_pos	1,3-Dimethyluracil	1,3-¶þ¼×»ùëåà×à¤	4.463	C6H8N2O2	140.14	Organoheterocyclic compounds	ÓÐ»úÔÓ»·»¯ºÏÎï	"874-14-6"	7363	34790	13900	20670	18730	14130	1.04713244909397	0.0664439366008	0.784322341128082	0.666666666666667	0.50403955055202
Com_428_pos	3-Ureidopropionate	3-õ£ëå±ûËá	1.07	C4H8N2O3	132.12	Organic Acid And Its Derivatives	ÓÐ»úËá¼°ÆäÑÜÉúÎï	"462-88-4"	1335000	1305000	1293000	1378000	1446000	1365000	0.93888756266412	-0.0909756979236	0.0518414948119288	1	1.22312213447932
Com_429_pos	5-Methyluridine	5-¼×»ùÄòÜÕ	3.706	C10H14N2O6	258.23	Nucleotide And Its Derivates	ºËÜÕËá¼°ÆäÑÜÉúÎï	"1463-10-1"	43380	40020	23490	62220	37670	60140	0.667937261763419	-0.582215495771	0.177631682880268	0.777777777777778	1.42984274232952
Com_42_neg	ATP	ÈýÁ×ËáÏÙÜÕ	1.04	C10H16N5O13P3	507.181	Nucleotide And Its Derivates	ºËÜÕËá¼°ÆäÑÜÉúÎï	"56-65-5"	61210	51860	12660	42710000	105700	126500	0.00292788911606764	-8.41592336722	0.243580332724682	1	1.32782895888719
Com_430_pos	LysoPC 18:0	ÈÜÑªÁ×Ö¬õ£µ¨¼î 18:0	13.8	C26H54NO7P	523.36	Phospholipid	Á×Ö¬		45960	116500	100500	91160	137800	70950	0.876796372245007	-0.189686265744	0.657087430030835	0.444444444444444	0.669035483634594
Com_431_pos	D-Glucosamine	D-°±»ùÆÏÌÑÌÇ	0.72	C6H13NO5	179.172	Amino Acid And Its Derivatives	°±»ùËá¼°ÆäÑÜÉúÎï	"3416-24-8"	82520	80370	65860	79890	89400	82990	0.906730616775012	-0.141254094925	0.290511489350132	0.777777777777778	0.808646282750103
Com_432_pos	Pseudouridine	¼ÙÄòÜÕ	1.46	C9H12N2O6	244.201	Nucleotide And Its Derivates	ºËÜÕËá¼°ÆäÑÜÉúÎï	"1445-07-4"	39470	28590	23790	36520	46830	40970	0.738819176319176	-0.436706782409	0.150486742132668	0.888888888888889	1.28013070568957
Com_433_pos	O-Acetyl-L-carnitine	ÒÒõ£»ù-L-Èâ¼î	1.45	C9H17lNO4	203.236	Carnitine	Èâ¼îÀà	"3040-38-8"	15680000	12360000	9194000	13260000	15740000	14630000	0.853403621361449	-0.228699862355	0.366497020933073	0.777777777777778	0.923595549127461
Com_434_pos	Thymine	ÐØÏÙà×à¤	7.29	C5H6N2O2	126.113	Nucleotide And Its Derivates	ºËÜÕËá¼°ÆäÑÜÉúÎï	"65-71-4"	28340	20920	99570	7302	27190	33080	2.20253951340792	1.13916790123	0.337960354454619	0.666666666666667	0.686301660150337
Com_435_pos	XMP	5'-Á×Ëá»ÆÔ­°±Ëá	1.43	C10H11N4O9P--	362.19	Nucleotide And Its Derivates	ºËÜÕËá¼°ÆäÑÜÉúÎï	"523-98-8"	13680	22650	13210	7381	12140	8822	1.74787425466606	0.8056013984	0.0752021314085073	1	1.23276231162785
Com_436_pos	Tyramine	ÀÒ°·	1.98	C8H11NO	137.179	Benzene and substituted derivatives	±½¼°ÆäÑÜÉúÎï	"51-67-2"	33770	24810	24750	38010	35830	18290	0.904482796049061	-0.144835032937	0.828200613565131	0.666666666666667	0.220161183464773
Com_437_pos	Dimethyl phthalate	ÁÚ±½¶þ¼×Ëá¶þ¼×õ¥	9.12	C10H10O4	194.18	Organic Acid And Its Derivatives	ÓÐ»úËá¼°ÆäÑÜÉúÎï	"131-11-3"	2689000	2669000	2421000	2617000	2536000	2586000	1.00516862643752	0.00743754729284	0.91614844945245	0.666666666666667	0.320435692159083
Com_438_pos	Dibutyl phthalate	ÁÚ±½¶þ¼×Ëá¶þ¶¡õ¥	13.61	C16H22O4	278.34	Organic Acid And Its Derivatives	ÓÐ»úËá¼°ÆäÑÜÉúÎï	"84-74-2"	5098000	5811000	8988000	7361000	7733000	6764000	0.910284564004026	-0.135610478256	0.550771188169962	0.666666666666667	0.784872003254624
Com_439_pos	Dl-Threitol	ËÕÌÇ´¼	0.69	C4H10O4	122.12	Sugar Alcohols	ÌÇ´¼	"7493-90-5"	8539000	7349000	7395000	9044000	8911000	8414000	0.882968637415147	-0.179565899878	0.107102734308418	0.888888888888889	1.07868937029481
Com_43_neg	Anthranilic acid	ÁÚ°±»ù±½¼×Ëá	1.44	C7H7NO2	137.14	Benzoic Acid And Its Derivatives	±½¼×Ëá¼°ÆäÑÜÉúÎï	"118-92-3"	32950	142500	124700	39620	98020	50500	1.59535452322738	0.673877058515	0.545221467435204	0.666666666666667	0.88273316480658
Com_440_pos	Dl-Tropic acid	ÍÐÆ·Ëá	4.09	C9H10O3	166.174	Organic Acid And Its Derivatives	ÓÐ»úËá¼°ÆäÑÜÉúÎï	"28845-94-5"	1691000	1123000	1761000	1542000	1786000	1416000	0.964376053962901	-0.0523322664872	0.769307334772844	0.444444444444444	0.263681947822441
Com_441_pos	D-Myo-inositol 4-monophosohate	D-ÏËÎ¬´¼-4-Á×Ëá	0.92	C6H13O9P	260.136	Alcohols and polyols	´¼Àà¼°Æä¶àÔª´¼	"46495-39-0"	1267000	789600	452700	1115000	1263000	1617000	0.62811013767209	-0.670910540322	0.204543397070049	0.777777777777778	0.58334495181931
Com_442_pos	Pantothenic acid	D-·ºËá	4.57	C9H17NO5	219.235	Vitamins	Î¬ÉúËØ	"79-83-4"	8885000	7948000	7847000	7800000	5206000	8397000	1.15310937719011	0.205529365067	0.391024852384919	0.777777777777778	0.893050617264245
Com_443_pos	Ergosta-5,7,9(11),22-Tetraen-3-beta-Ol	È¥ÇâÂó½Ç¹Ì´¼	11.13	C28H42O	394.632	Hormones	¼¤ËØ	"516-85-8"	4764000	6587000	7236000	5925000	4031000	7053000	1.09277441354577	0.127995609565	0.659140989255508	0.666666666666667	0.419145908003811
Com_444_pos	Ergosterol	Âó½Ç¹Ì´¼	11.13	C28H44O	396.648	Hormones	¼¤ËØ	"57-87-4"	95440	113000	143900	112000	70250	136300	1.10607439962329	0.145448431104	0.626067203567514	0.666666666666667	0.529357675558816
Com_445_pos	Ergothioneine	Âó½ÇÁòÒò	1.03	C9H15N3O2S	229.299	Organic Acid And Its Derivatives	ÓÐ»úËá¼°ÆäÑÜÉúÎï	"497-30-3"	110700	67340	74870	52040	100900	73860	1.11512345679012	0.15720344166	0.646082182694856	0.666666666666667	0.591318088315539
Com_446_pos	Dl-3-Hydroxynorvaline	DL-3-ôÇ»ùÕýçÓ°±Ëá	0.85	C5H11NO3	133.146	Amino Acid And Its Derivatives	°±»ùËá¼°ÆäÑÜÉúÎï	"2280-42-4"	5972000	6288000	10120000	5658000	7576000	9119000	1.00120789155818	0.00174156756016	0.967753440654233	0.444444444444444	0.422381050420101
Com_447_pos	6-Aminohexanoate	6-°±»ù¼ºËá	2.09	C6H13NO2	131.173	Organic Acid And Its Derivatives	ÓÐ»úËá¼°ÆäÑÜÉúÎï	"60-32-2"	10170000	4043000	14100000	10760000	13610000	8322000	0.866052856968065	-0.207473016634	0.586496505986312	0.555555555555556	0.622650260048962
Com_448_pos	3-Hydroxy-DL-kynurenine	3-ôÇ»ù-DL-È®ÄòËØ	9.78	C10H12N2O4	224.213	Ketones	ÍªÀà	"484-78-6"	244200	250000	250500	248100	260500	251900	0.97922419460881	-0.0302888903996	0.292911899254208	0.777777777777778	1.35443148236402
Com_449_pos	Thioguanine	ÁòÄñàÑßÊ	18.3	C5H5N5S	167.192	Purines and purine derivatives	àÑßÊ¼°ÆäÑÜÉúÎï	"154-42-7"	10300	6546	21440	10590	4454	7726	1.68142292490119	0.749682648379	0.349093066868941	0.666666666666667	1.05512380310973
Com_44_neg	Alloxan	ËÄÑõà×à¤	0.7	C4H4N2O5	160.085	Organoheterocyclic compounds	ÓÐ»úÔÓ»·»¯ºÏÎï	"2244-11-3"	86760000	75150000	71960000	69860000	84740000	80860000	0.99324726068122	-0.00977518543839	0.938253039713618	0.444444444444444	0.102562859926465
Com_450_pos	L-Carnitine	×óÐýÈâ¼î	0.87	C7H15NO3	161.2	Carnitine	Èâ¼îÀà	"541-15-1"	57520000	59750000	44120000	43250000	47390000	68660000	1.01311989956058	0.0188049226734	0.891962118505956	0.555555555555556	0.15222577606227
Com_451_pos	Inosine	¼¡ÜÕ	2.826	C10H12N4O5	268.23	Nucleotide And Its Derivates	ºËÜÕËá¼°ÆäÑÜÉúÎï	"58-63-9"	18380000	28190000	16090000	3542000	19620000	16800000	1.56798959011061	0.648915981427	0.3541711934343	0.666666666666667	1.26397411187886
Com_452_pos	Nicotinic Acid	ÑÌËá	1.478	C6H5NO2	123.11	Vitamins	Î¬ÉúËØ	"59-67-6"	438500	463000	454100	216100	647300	357500	1.11032844622819	0.15098650329	0.58617821930432	0.666666666666667	0.796185167662932
Com_453_pos	Nicotinamide	ÑÌõ£°·	1.539	C6H6N2O	122.12	Vitamins	Î¬ÉúËØ	"98-92-0"	86760000	86930000	86550000	48800000	115700000	71880000	1.10093916575006	0.138734752558	0.590620994363243	0.666666666666667	0.742980932938434
Com_454_pos	Triethyl phosphate	Á×ËáÈýÒÒõ¥	7.89	C6H15O4P	182.155	Organic Acid And Its Derivatives	ÓÐ»úËá¼°ÆäÑÜÉúÎï	"78-40-0"	4645000	4795000	5018000	4681000	4682000	4584000	1.03663870366387	0.0519131639149	0.249582594060156	0.777777777777778	1.20360528388589
Com_455_pos	Trimethyllysine	Èý¼×»ùÀµ°±Ëá	1.03	C9H21N2O2	189.275	Amino Acid And Its Derivatives	°±»ùËá¼°ÆäÑÜÉúÎï	"66989-56-8"	893400	838700	809100	729900	1194000	1147000	0.827509850532417	-0.273151609276	0.401972853318067	0.666666666666667	0.757061133306756
Com_456_pos	Testosterone	ØºÍª	0.72	C19H28O2	288.424	Hormones	¼¤ËØ	"58-22-0"	1537000	1281000	1520000	1419000	1627000	1430000	0.96916890080429	-0.0451799833041	0.681988369139543	0.444444444444444	0.220988717588096
Com_457_pos	Styrene	±½ÒÒÏ©	10.53	C8H8	104.149	Benzene and substituted derivatives	±½¼°ÆäÑÜÉúÎï	"100-42-5"	176600	242400	308100	231800	321600	193600	0.973360107095047	-0.0389544475316	0.897701440120926	0.444444444444444	0.491785067078305
Com_458_pos	1-Methylhistidine	1-¼×»ù×é°±Ëá	0.84	C7H11N3O2	169.18	Amino Acid And Its Derivatives	°±»ùËá¼°ÆäÑÜÉúÎï	"332-80-9"	4674000	6128000	7140000	8367000	7826000	8705000	0.720620130130934	-0.472689141659	0.102390171676665	1	1.51414760243641
Com_459_pos	Furfural	¿·È©	0.87	C5H4O2	96.08	Aldehydes	È©Àà	"98-01-1"	73360	55870	62750	44090	54470	74130	1.11170305171116	0.152771479577	0.523127058544213	0.666666666666667	0.531090218297773
Com_45_neg	cis-4-Hydroxy-D-proline	Ë³Ê½-4-ôÇ»ù-D-¸¬°±Ëá	2.26	C5H9NO3	131.13	Organic Acid And Its Derivatives	ÓÐ»úËá¼°ÆäÑÜÉúÎï	"2584-71-6"	154900	91580	231300	144100	221300	151400	0.924496904024768	-0.113259606578	0.697650496288328	0.555555555555556	0.426071070335651
Com_460_pos	Vidarabine	°¢ÌÇÏÙÜÕ	2.56	C10H13N5O4	267.24	Nucleotide And Its Derivates	ºËÜÕËá¼°ÆäÑÜÉúÎï	"5536-17-4"	3909000	4491000	396900	480000	11820000	6899000	0.458195739361425	-1.12596405141	0.673950076910824	0.777777777777778	0.554815045530328
Com_461_pos	Isonicotinic acid	ÒìÑÌËá	1.49	C6H5NO2	123.11	Pyridine And Its Derivatives	ßÁà¤¼°ÆäÑÜÉúÎï	"55-22-1"	11180000	10800000	10710000	5694000	15450000	8853000	1.08977564423109	0.124031153102	0.617728294152528	0.666666666666667	0.696426399780155
Com_462_pos	2-Furoylglycine	N-(2-¿·õ£)¸Ê°±Ëá	0.79	C7H7NO4	169.13	Amino Acid And Its Derivatives	°±»ùËá¼°ÆäÑÜÉúÎï	"5657-19-2"	28340000	21760000	27280000	28680000	27680000	27530000	0.922398378829419	-0.116538117519	0.401230769044362	0.777777777777778	0.719780814836156
Com_463_pos	1-Methylxanthine	1-¼×»ù»ÆàÑßÊ	4.09	C6H6N4O2	166.14	Purines and purine derivatives	àÑßÊ¼°ÆäÑÜÉúÎï	"6136-37-4"	12490	15770	19630	12970	9489	30710	0.90071282138088	-0.150860896963	0.985341098597245	0.555555555555556	0.128841241330885
Com_464_pos	Picolinic acid	2-ßÁà¤¼×Ëá	1.48	C6H5NO2	123.11	Organoheterocyclic compounds	ÓÐ»úÔÓ»·»¯ºÏÎï	"98-98-6"	513300	474800	510500	305900	695300	435500	1.04308484721932	0.0608565151768	0.719967362529741	0.666666666666667	0.512837559316826
Com_465_pos	Phthalate	ÁÚ±½¶þ¼×Ëá	4.07	C8H6O4	166.13	Benzoic Acid And Its Derivatives	±½¼×Ëá¼°ÆäÑÜÉúÎï	"88-99-3"	1172000	800200	1296000	1080000	1281000	1003000	0.971521997621879	-0.0416814325809	0.805326189006045	0.555555555555556	0.210919581644853
Com_466_pos	L-allo-Threonine	L-±ðËÕ°±Ëá	0.87	C4H9NO3	119.12	Amino Acid And Its Derivatives	°±»ùËá¼°ÆäÑÜÉúÎï	"28954-12-3"	6314000	3169000	7807000	7173000	9508000	7910000	0.703102761172787	-0.50819253475	0.264936284269145	0.888888888888889	1.19656213604729
Com_467_pos	L-allo-Isoleucine	L-±ðÒìÁÁ°±Ëá	2.28	C6H13NO2	131.17	Amino Acid And Its Derivatives	°±»ùËá¼°ÆäÑÜÉúÎï	"1509-34-8"	30820000	15230000	41840000	30310000	39880000	27480000	0.899866898740657	-0.152216469809	0.627675411986845	0.555555555555556	0.533806295026546
Com_468_pos	Asp-glu	L-Ìì¶¬°±õ£-L-¹È°±Ëá	0.96	C9H14N2O7	262.217	Amino Acid And Its Derivatives	°±»ùËá¼°ÆäÑÜÉúÎï	"6157-06-8"	12770	20100	20800	11020	12353	16850	1.33431121497651	0.416095200209	0.238794804320991	0.888888888888889	1.2483005621098
Com_469_pos	Asp-Phe methyl ester	°¢Ë¹°ÍÌð	5.36	C14H18N2O5	294.303	Organic Acid And Its Derivatives	ÓÐ»úËá¼°ÆäÑÜÉúÎï	"22839-47-0"	132100	128900	128800	92850	112100	101600	1.27157070624694	0.346611685949	0.0437868242800467	1	1.81494453889111
Com_46_neg	cholesteryl sulfate	µ¨çÞ´¼ÁòËáÑÎ	0.94	C27H46O4S	466.717	Hormones	¼¤ËØ	"1256-86-6"	1459000	140400	189100	587100	1111000	632400	0.767431881570478	-0.381889394544	0.39763833418339	0.666666666666667	0.981299783371784
Com_470_pos	Allopurinol	±ðàÑßÊ	2.69	C5H4N4O	136.111	Nucleotide And Its Derivates	ºËÜÕËá¼°ÆäÑÜÉúÎï	"315-30-0"	18190000	26950000	13670000	3447000	20170000	16020000	1.48371471100235	0.569213716898	0.397564243593816	0.666666666666667	1.1479853056503
Com_471_pos	aminoimidazole carboxamide ribonucleotide	°±»ùßäßò¼×õ£°·ºËÌÇºËÜÕËá	16.98	C9H15N4O8P	338.211	Nucleotide And Its Derivates	ºËÜÕËá¼°ÆäÑÜÉúÎï	"68984-62-3"	277800	319200	353200	346800	307300	342800	0.953154779817434	-0.0692175870023	0.563150732614168	0.555555555555556	0.711143296540115
Com_472_pos	2'-Hydroxy-5'-methylacetophenone	2'-ôÇ»ù-5'-¼×»ù±½ÒÒÍª	8.74	C9H10O2	150.174	Benzene and substituted derivatives	±½¼°ÆäÑÜÉúÎï	"1450-72-2"	325100	404700	479000	550500	312400	481700	0.899003421091774	-0.153601489067	0.682315116869052	0.666666666666667	0.465950896385927
Com_473_pos	2-Methylsuccinic Acid	¼×»ù¶¡¶þËá	0.94	C5H8O4	132.115	Organic Acid And Its Derivatives	ÓÐ»úËá¼°ÆäÑÜÉúÎï	"498-21-5"	36920000	37010000	33760000	35190000	37480000	37830000	0.974570135746606	-0.0371620809252	0.530125292288847	0.777777777777778	0.729461028126624
Com_474_pos	Noradrenaline	È¥¼×ÉöÉÏÏÙËØ	6.36	C8H11NO3	169.178	Hormones	¼¤ËØ	"51-41-2"	29300	24380	17550	20170	21450	23530	1.09332310053722	0.128719811494	0.694844738212565	0.666666666666667	0.490256018250222
Com_475_pos	N-carbamoyl-L-aspartate	N-°±¼×õ£-L-Ìì¶¬°±Ëá	0.9	C5H8N2O5	176.127	Amino Acid And Its Derivatives	°±»ùËá¼°ÆäÑÜÉúÎï	"13184-27-5"	265900	119900	372600	91700	216300	105300	1.8349866924752	0.875769600524	0.251331722466049	0.888888888888889	1.20207803926024
Com_476_pos	Pyridoxine	ßÁ¶ß´¼	1.563	C8H11NO3	169.178	Pyridine And Its Derivatives	ßÁà¤¼°ÆäÑÜÉúÎï	"65-23-6"	30370	56380	111000	41781	19320	29490	2.18288792484905	1.12623806051	0.202920427888775	0.888888888888889	1.60599542058233
Com_477_pos	Dopamine HCl	ÑÎËá¶à°Í°·	1.5	C8H12ClNO2	189.64	Phenols And Its Derivatives	·ÓÀà¼°ÆäÑÜÉúÎï	"62-31-7"	786100	916200	789100	437400	872300	694200	1.24327561255552	0.314146152215	0.336142344146925	0.777777777777778	1.30564247677084
Com_478_pos	Epinephrine bitartrate	¾ÆÊ¯ËáÉöÉÏÏÙËØ	14.86	C13H19NO9	333.29	Hormones	¼¤ËØ	"51-42-3"	71660	110000	109300	236000	118200	119000	0.614877430262046	-0.701629242772	0.184849226211316	1	1.43677363202439
Com_479_pos	L-Serine	Ë¿°±Ëá	0.846	C3H7NO3	105.093	Amino Acid And Its Derivatives	°±»ùËá¼°ÆäÑÜÉúÎï	"56-45-1"	2186000	2019000	2971000	3180000	2146000	2800000	0.883091311838543	-0.179365474312	0.489756836601018	0.666666666666667	0.540460608363382
Com_47_neg	6-Phospho-D-glucono-1,5-lactone	6-Á×Ëá-ÆÏÌÑÌÇ-1,5-ÄÚõ¥	0.97	C6H11O9P	258.12	Sugar Acids And Its Derivatives	ÌÇËá¼°ÆäÑÜÉúÎï	"2641-81-8"	2732000	850600	597800	3107000	3123000	1457000	0.543827240796149	-0.878779675821	0.233504364975708	0.888888888888889	1.4217210052448
Com_480_pos	Hypoxanthine	´Î»ÆàÑßÊ	1.509	C5H4N4O	136.11	Nucleotide And Its Derivates	ºËÜÕËá¼°ÆäÑÜÉúÎï	"68-94-0"	89950000	59810000	76900000	43660000	81600000	67140000	1.17806652806653	0.236421013703	0.459941526346797	0.666666666666667	0.985365971717294
Com_481_pos	L-Glutamate	L-¹È°±Ëá	0.886	C5H9NO4	147.129	Amino Acid And Its Derivatives	°±»ùËá¼°ÆäÑÜÉúÎï	"56-86-0"	59580000	91990000	102400000	85660000	67210000	68790000	1.14576378236939	0.196309639966	0.572438692964935	0.666666666666667	0.700356544670399
Com_482_pos	D-2-Aminobutyric acid	D-2-°±»ù¶¡Ëá	0.947	C4H9NO2	103.12	Organic Acid And Its Derivatives	ÓÐ»úËá¼°ÆäÑÜÉúÎï	"2623-91-8"	17750000	22400000	24090000	15840000	16670000	19050000	1.24592707525213	0.317219629156	0.13170353671161	0.888888888888889	1.48420120915885
Com_483_pos	DL-Norvaline	D-ÕýçÓ°±Ëá	1.068	C5H11NO2	117.15	Amino Acid And Its Derivatives	°±»ùËá¼°ÆäÑÜÉúÎï	"760-78-1"	23400000	11310000	30820000	27210000	33260000	18540000	0.829388684976585	-0.26987972963	0.532951754349844	0.666666666666667	0.65008865637019
Com_484_pos	Methionine	µ°°±Ëá	1.46	C5H11NO2S	149.211	Amino Acid And Its Derivatives	°±»ùËá¼°ÆäÑÜÉúÎï	"59-51-8"	4973000	2689000	10730000	5731000	10960000	9196000	0.710472437903195	-0.493149412304	0.375921143241058	0.777777777777778	1.10760235159572
Com_485_pos	3-Aminoisobutyric acid	3-°±»ùÒì¶¡Ëá	0.931	C4H9NO2	103.12	Amino Acid And Its Derivatives	°±»ùËá¼°ÆäÑÜÉúÎï	"144-90-1"	69580	82100	61110	71960	71200	59340	1.05081481481481	0.0715084454292	0.687945039963846	0.444444444444444	0.27577996277692
Com_486_pos	Anserine	¶ì¼¡ëÄ	0.771	C10H16N4O3	240.26	Organic Acid And Its Derivatives	ÓÐ»úËá¼°ÆäÑÜÉúÎï	"584-85-0"	290300000	234100000	281900000	285800000	294600000	282200000	0.934732204961744	-0.0973749939634	0.398719561539915	0.777777777777778	0.823974394122182
Com_487_pos	(S)-2-Aminobutanoate	L-¦Á-°±»ù¶¡Ëá	0.947	C4H9NO2	103.12	Amino Acid And Its Derivatives	°±»ùËá¼°ÆäÑÜÉúÎï	"1492-24-6"	16420000	21160000	22540000	14720000	15810000	17660000	1.24756173479975	0.319111208176	0.143663158557053	0.888888888888889	1.48796583085271
Com_488_pos	LysoPC 20:2	ÈÜÑªÁ×Ö¬õ£µ¨¼î 20:2	13.26	C28H54NO7P	547.36	Phospholipid	Á×Ö¬		258800	514700	237400	237600	180800	133200	1.8326686004351	0.873945928412	0.136325303090319	0.888888888888889	1.43383846900049
Com_489_pos	1-Aminocyclopropane-1-carboxylic acid	1-°±»ù»·±ûÍéôÈËá	0.89	C4H7NO2	101.048	Amino Acid And Its Derivatives	°±»ùËá¼°ÆäÑÜÉúÎï	"22059-21-8"	2207000	2071000	1943000	1810000	1723000	1730000	1.18202546076382	0.241261111422	0.0308188294392733	1	0.940042753124992
Com_48_neg	6-Phospho-D-gluconate	6-Á×ËáÆÏÌÑÌÇËá	0.98	C6H13O10P	276.135	Sugar Acids And Its Derivatives	ÌÇËá¼°ÆäÑÜÉúÎï	"921-62-0"	1006000	1207000	1353000	1065000	1089000	780700	1.21511568473779	0.281093671734	0.226115057079767	0.777777777777778	0.900202833595679
Com_490_pos	Levodopa	×óÐý¶à°Í	1.019	C9H11NO4	197.19	Amino Acid And Its Derivatives	°±»ùËá¼°ÆäÑÜÉúÎï	"59-92-7"	12150000	19640000	14270000	16160000	21650000	15950000	0.856770833333333	-0.223018726986	0.400228606761316	0.777777777777778	1.05364039942802
Com_491_pos	Betaine	Ìð²Ë¼î	0.907	C5H11NO2	117.15	Organic Acid And Its Derivatives	ÓÐ»úËá¼°ÆäÑÜÉúÎï	"107-43-7"	32670000	36020000	48700000	30190000	40370000	43410000	1.03000789681495	0.0426553982358	0.878549217567789	0.444444444444444	0.400523943061884
Com_492_pos	Choline Hydroxide	µ¨¼î	0.828	C5H15NO2	121.18	Cholines	µ¨¼îÀà	"123-41-1"	6467000	5057000	1995000	5892000	8510000	7706000	0.611498100235209	-0.709580078204	0.234733224276072	0.888888888888889	1.49261731129601
Com_493_pos	Trimethylamine N-oxide	Èý¼×°·N-Ñõ»¯Îï	0.872	C3H9NO	75.11	Polyamine	¶à°·	"1184-78-7"	81330	108800	188100	61170	120900	108400	1.30213102902193	0.380874629309	0.495121896972344	0.666666666666667	0.802013164181854
Com_494_pos	S-Adenosyl-L-methionine	S-ÏÙÜÕµ°°±Ëá	0.8	C15H22N6O5S	398.44	Amino Acid And Its Derivatives	°±»ùËá¼°ÆäÑÜÉúÎï	"29908-03-0"	107600	82930	104900	85940	142100	72610	0.982637618493265	-0.0252686237866	0.939868758673318	0.555555555555556	0.14608591382415
Com_495_pos	Pipecolic acid	ßßà¤¼×Ëá	1.042	C6H11NO2	129.16	Organic Acid And Its Derivatives	ÓÐ»úËá¼°ÆäÑÜÉúÎï	"535-75-1"	21020000	33970000	33510000	23220000	23900000	28860000	1.16478020531719	0.220057743193	0.498265202987023	0.666666666666667	0.852403284827069
Com_496_pos	Azelaic acid	ÈÉ¶þËá	7.433	C9H16O4	188.22	Fatty Acyls	Ö¬·¾õ£Àà	"123-99-9"	82180	67100	63610	80230	75340	61920	0.978849602280565	-0.0308408844069	0.854138934989791	0.444444444444444	0.502483845820193
Com_497_pos	gamma-Glutamylglutamic acid	¦Ã-¹È°±õ£¹È°±Ëá	1.05	C10H16N2O7	276.243	Amino Acid And Its Derivatives	°±»ùËá¼°ÆäÑÜÉúÎï	"1116-22-9"	38420	118300	81990	66830	56560	57340	1.32081004813811	0.401423000791	0.641756686700226	0.666666666666667	0.550750543334471
Com_498_pos	beta-Nicotinamide adenine dinucleotide phosphate	ÑÌõ£°·ÏÙàÑßÊ¶þºËÜÕËáÁ×Ëá	1.03	C21H29N7O17P3	744.41	Nucleotide And Its Derivates	ºËÜÕËá¼°ÆäÑÜÉúÎï	"53-59-8"	84190	85890	86100	246500	116300	88470	0.567686750725729	-0.816833024026	0.265979683610714	1	0.962218693851494
Com_499_pos	L-Pipecolate	L-ßßà¤Ëá	1.049	C6H11NO2	129.16	Amino Acid And Its Derivatives	°±»ùËá¼°ÆäÑÜÉúÎï	"3105-95-1"	975000	1568000	1551000	1141000	1119000	1352000	1.13344407530454	0.180713209543	0.579547966774669	0.666666666666667	0.76354931030179
Com_49_neg	Acetyl phosphate	ÒÒõ£Á×Ëá	0.9	C2H5O5P	140.032	Organic Acid And Its Derivatives	ÓÐ»úËá¼°ÆäÑÜÉúÎï	"590-54-5"	3932000	1836000	1774000	3904000	5223000	2640000	0.640945015721934	-0.641727496152	0.22132500875637	0.777777777777778	1.19170658065955
Com_4_neg	Decanoic acid	Õý¹ïËá	2.16	C10H20O2	172.265	Fatty Acyls	Ö¬·¾õ£Àà	"334-48-5"	3117000	953100	1785000	3371000	3554000	674100	0.770499138055822	-0.376134752065	0.840199560050687	0.666666666666667	0.402326783854768
Com_500_pos	gamma-Nonanolactone	¦Ã-ÈÉÄÚõ¥	4.1	C9H16O2	156.222	Esters	õ¥Àà	"104-61-0"	271600	184000	312900	250800	272100	233100	1.01653439153439	0.0236590254697	0.975118564590955	0.555555555555556	0.0446928985153317
Com_501_pos	UDP-N-acetylglucosamine	Äòà×à¤¶þÁ×Ëá-N-ÒÒõ£ÆÏÌÇ°·	0.99	C17H27N3O17P2	607.354	Nucleotide And Its Derivates	ºËÜÕËá¼°ÆäÑÜÉúÎï	"528-04-1"	64990	26030	37380	95900	45600	39110	0.710924090581917	-0.492232571593	0.436588859305483	0.777777777777778	0.943562357631188
Com_502_pos	Choline Chloride	ÂÈ»¯µ¨¼î	0.83	C5H14ClNO	139.62	Cholines	µ¨¼îÀà	"67-48-1"	3305000	2546000	1050000	2863000	4459000	3946000	0.612442314518992	-0.707354130734	0.23083996007334	0.888888888888889	1.50222861794115
Com_503_pos	1-Methylguanine	1-¼×»ùÄñàÑßÊ	4.03	C6H7N5O	165.153	Nucleotide And Its Derivates	ºËÜÕËá¼°ÆäÑÜÉúÎï	"938-85-2"	70960	54890	76970	61830	73000	69120	0.994459426329983	-0.00801558418694	0.914196900290611	0.555555555555556	0.142884624758842
Com_504_pos	Serotonin	5-ôÇ»ùÉ«°·	2.94	C10H12N2O	176.215	Indole And Its Derivatives	ßÅßá¼°ÆäÑÜÉúÎï	"50-67-9"	55330	25730	73210	49280	59110	19150	1.209581307825	0.274507750263	0.679931835179523	0.666666666666667	0.55662247508858
Com_505_pos	1-Palmitoyl-Sn-Glycero-3-Phosphocholine	1-Ê®Áùõ£-SN-±ûÈý´¼-Á×Ëáµ¨¼î	12.52	C24H50NO7P	495.63	Phospholipid	Á×Ö¬	"17364-16-8"	524800	1193000	978500	1002000	1052000	443600	1.07955637411915	0.110438582442	0.82160740286293	0.444444444444444	0.319994920112924
Com_506_pos	1-Stearoyl-Sn-Glycerol-3-Phosphocholine	1-Ó²Ö¬õ£-SN-¸ÊÓÍ-3-Á×õ£µ¨¼î	13.78	C26H54NO7P	523.683	Phospholipid	Á×Ö¬	"19420-57-6"	22980	90380	65540	64880	117700	66080	0.719456285691305	-0.4750210637	0.413355328048311	0.666666666666667	1.20429027670304
Com_507_pos	2-(3,4-dimethoxyphenyl)ethanamine	2-(3,4-¶þ¼×Ñõ»ù±½»ù)ÒÒ°·	1.81	C10H15NO2	181.232	Benzene and substituted derivatives	±½¼°ÆäÑÜÉúÎï	"120-20-7"	10280000	10580000	11550000	10120000	13350000	7786000	1.03692091118505	0.0523058600215	0.74346241956233	0.666666666666667	0.229529806546854
Com_508_pos	2-(Dimethylamino)Guanosine	¶þ¼×»ùÄñÜÕ	4.57	C12H17N5O5	311.294	Nucleotide And Its Derivates	ºËÜÕËá¼°ÆäÑÜÉúÎï	"2140-67-2"	256600	220600	273200	225800	274400	257100	0.990888683480787	-0.0132051008566	0.913671029179512	0.666666666666667	0.162508700976433
Com_509_pos	1-Methylguanosine	1-¼×»ùÄñÜÕ	4.04	C11H15N5O5	297.267	Nucleotide And Its Derivates	ºËÜÕËá¼°ÆäÑÜÉúÎï	"2140-65-0"	269400	252200	329700	253100	319900	358300	0.914098571888758	-0.129578348086	0.546267808322838	0.666666666666667	0.591738096435122
Com_50_neg	ADP-ribose	ADPºËÌÇ	1.05	C15H23N5O14P2	591.315	Nucleotide And Its Derivates	ºËÜÕËá¼°ÆäÑÜÉúÎï	"20762-30-5"	43800000	33850000	49260000	24290000	42480000	40310000	1.18518864400448	0.245116708161	0.43084892723872	0.777777777777778	0.881936648432977
Com_510_pos	1-Methylnicotinamide	1-¼×»ùÑÌõ£°·	2.68	C7H9N2O+	137.159	Pyridine And Its Derivatives	ßÁà¤¼°ÆäÑÜÉúÎï	"3106-60-3"	5546000	9417000	4729000	1211000	6205000	5564000	1.5171032357473	0.601319261348	0.383369193061769	0.444444444444444	1.16226712988142
Com_511_pos	1-Methyluric acid	1-¼×»ùÄòËá	7.86	C6H6N4O3	182.137	Organic Acid And Its Derivatives	ÓÐ»úËá¼°ÆäÑÜÉúÎï	"708-79-2"	1618000	1639000	1527000	1650000	1658000	1592000	0.976326530612245	-0.0345643596918	0.40278869192627	0.777777777777778	0.929542783197356
Com_512_pos	1-Oleoyl-Sn-Glycero-3-Phosphocholine	ÓÍõ£Á×Ëáµ¨¼î	12.82	C26H52NO7P	521.667	Phospholipid	Á×Ö¬	"19420-56-5"	4790000	10490000	6660000	8287000	8645000	4887000	1.00554562537238	0.00797854360758	0.961457989123168	0.555555555555556	0.231732375464033
Com_513_pos	L-Hydroxylysine	5-ôÇ»ù-L-Àµ°±Ëá	0.9	C6H14N2O3	163.195	Amino Acid And Its Derivatives	°±»ùËá¼°ÆäÑÜÉúÎï	"1190-94-9"	53310	34700	28870	43470	42990	55020	0.826123833757421	-0.275570040897	0.358519877188246	0.777777777777778	1.09674044425516
Com_514_pos	DL-Leucine	DL-ÁÁ°±Ëá	2.3	C6H13NO2	131.173	Amino Acid And Its Derivatives	°±»ùËá¼°ÆäÑÜÉúÎï	"328-39-2"	2410000	1125000	3254000	2339000	3258000	2140000	0.87747188832881	-0.188575188522	0.595778556233713	0.444444444444444	0.587815375262546
Com_515_pos	Dl-Indole-3-lactic acid	DL-ßÅßá-3-ÈéËá	4.87	C11H11NO3	205.21	Organic Acid And Its Derivatives	ÓÐ»úËá¼°ÆäÑÜÉúÎï	"832-97-3"	23620000	17070000	21390000	19800000	23200000	16510000	1.04318601915644	0.060996439723	0.770830358189574	0.666666666666667	0.225504816348182
Com_516_pos	Dl-Norleucine	DL-ÕýÁÁ°±Ëá	0.9	C6H13NO2	131.173	Amino Acid And Its Derivatives	°±»ùËá¼°ÆäÑÜÉúÎï	"616-06-8"	32220000	32010000	38760000	25820000	36640000	41260000	0.992961820285384	-0.0101898481749	0.962353389351153	0.555555555555556	0.318798139008843
Com_517_pos	N-acetyl-glutamate	N-ÒÒõ£-¹È°±Ëá	1.67	C7H11NO5	189.166	Amino Acid And Its Derivatives	°±»ùËá¼°ÆäÑÜÉúÎï		894800	308800	417900	214600	258400	234000	2.29349363507779	1.19754690365	0.144355778549146	1	1.71901194154851
Com_518_pos	N-Acetylglycine	N-ÒÒõ£»ù¸Ê°±Ëá	0.9	C4H7NO3	117.103	Amino Acid And Its Derivatives	°±»ùËá¼°ÆäÑÜÉúÎï	"543-24-8"	30280000	38050000	45290000	31430000	42320000	39210000	1.00584277620397	0.00840481437052	0.999117498116808	0.555555555555556	0.364128229216404
Com_519_pos	N-Acetylhistamine	ÒÒõ£»ù×é°·	2.73	C7H11N3O	153.182	Amino Acid And Its Derivatives	°±»ùËá¼°ÆäÑÜÉúÎï	"673-49-4"	168400	256100	117100	28640	142600	157100	1.6495096546263	0.722037222062	0.342127463826384	0.777777777777778	1.23336657294271
Com_51_neg	Ala-trp	L-±û°±õ£-L-É«°±Ëá	5.46	C14H17N3O3	275.303	Amino Acid And Its Derivatives	°±»ùËá¼°ÆäÑÜÉúÎï	"16305-75-2"	169100	217400	248200	321200	284500	367400	0.652245401294831	-0.616513227638	0.0396048279032111	1	1.00042362031066
Com_520_pos	N-Acetylthreonine	N-ÒÒõ£»ùËÕ°±Ëá	1.74	C6H11NO4	161.156	Amino Acid And Its Derivatives	°±»ùËá¼°ÆäÑÜÉúÎï	"17093-74-2"	133800	144000	86920	131800	159000	120500	0.886749331388281	-0.173401757523	0.496430203338228	0.444444444444444	0.786237191323354
Com_521_pos	Feruloyl Putrescine	°¢Îºõ£¸¯°·	15.1	C14H20N2O3	264.32	Phenolamides	·Ó°·	"501-13-3"	840200	1164000	1092000	1638000	989400	988200	0.856344728399159	-0.22373641294	0.535931766134034	0.444444444444444	0.737884796807434
Com_522_pos	L-Lysinamide	Àµ°±õ£°·	4.91	C6H15N3O	145.2	Amino Acid And Its Derivatives	°±»ùËá¼°ÆäÑÜÉúÎï	"32388-19-5"	1365000	1001000	1279000	1274000	1432000	929700	1.00255796682895	0.00368565417542	0.953550037458282	0.555555555555556	0.128397003252881
Com_523_pos	Phosphoethanolamine	Á×ËáÒÒ´¼°·	0.86	C2H8NO4P	141.063	Organic Acid And Its Derivatives	ÓÐ»úËá¼°ÆäÑÜÉúÎï	"1071-23-4"	639100	737400	968600	807000	549000	545900	1.23303012776697	0.302208050875	0.299740434978594	0.777777777777778	0.797735955341894
Com_524_pos	Calcium phosphorylcholine chloride	ÂÈ»¯Á×õ£µ¨¼î¸ÆÑÎ	0.87	C5H13NO4P.Ca.Cl	257.666	Cholines	µ¨¼îÀà	"4826-71-5"	11970000	12630000	16390000	10150000	15120000	12490000	1.08554025423729	0.118413225273	0.600941614270783	0.666666666666667	0.352828802576461
Com_525_pos	Pyridoxine O-Glucoside	ßÁ¶ß´¼ÆÏÌÑÌÇÜÕ	0.99	C14H21NO8	331.127	Pyridine And Its Derivatives	ßÁà¤¼°ÆäÑÜÉúÎï		500300	251700	407200	363800	692200	402700	0.794680194693906	-0.331553705376	0.469977354548497	0.444444444444444	0.748150136910107
Com_526_pos	Cyprodinil	à×¾ú»·°·	9.02	C14H15N3	225.289	Benzene and substituted derivatives	±½¼°ÆäÑÜÉúÎï	"121552-61-2"	254000	264900	310100	272900	275100	262300	1.02307787239294	0.032915961153	0.784095919473097	0.555555555555556	0.479686439927039
Com_527_pos	N-Methyl-a-aminoisobutyric acid	N-¼×»ù-¦Á-°±»ùÒì¶¡Ëá	1.22	C5H11NO2	117.146	Organic Acid And Its Derivatives	ÓÐ»úËá¼°ÆäÑÜÉúÎï	"2566-34-9"	19720000	9992000	26090000	23470000	28060000	16620000	0.818811445341159	-0.288396826403	0.492055762722597	0.666666666666667	0.705828642388872
Com_528_pos	Niflumic Acid	·úÄáËá	15.12	C13H9F3N2O2	282.218	Others	ÆäËü	"4394-00-7"	2980000	4109000	4082000	6323000	4295000	4221000	0.752813531909158	-0.40963553398	0.180674539357536	1	1.44572955276705
Com_529_pos	N¦Å-(1-Carboxymethyl)-L-lysine	N¦Å-(1-ôÈ¼×»ù)-L-Àµ°±Ëá	0.84	C8H16N2O4	204.224	Amino Acid And Its Derivatives	°±»ùËá¼°ÆäÑÜÉúÎï	"5746-04-3"	109700	257100	227100	392500	105100	186100	0.868655843206084	-0.203143392698	0.903644197956918	0.555555555555556	0.178098411504861
Com_52_neg	N-Acetylglucosamine 1-phosphate	N-ÒÒõ£ÆÏÌÑÌÇ°· 1-Á×Ëá	0.91	C8H16NO9P	301.1	Carbohydrates And Its Derivatives	ÌÇÀà¼°ÆäÑÜÉúÎï		306900	454100	477900	265300	245300	215300	1.70670891307343	0.77121702118	0.0486849253875088	1	1.8416785869495
Com_530_pos	Oxymetazoline	ôÇ¼×ßòßø	5.06	C16H24N2O	260.375	Benzene and substituted derivatives	±½¼°ÆäÑÜÉúÎï	"1491-59-4"	583100	554800	591100	508500	622500	585600	1.00722358149831	0.0103839654853	0.881925774838765	0.555555555555556	0.404813163945795
Com_531_pos	N¦Å,N¦Å,N¦Å-trimethyllysine	N¦Å,N¦Å,N¦Å-Èý¼×»ùÀµ°±Ëá	0.76	C9H20N2O2	188.267	Amino Acid And Its Derivatives	°±»ùËá¼°ÆäÑÜÉúÎï	"19253-88-4"	14800000	11730000	11550000	11870000	14270000	13770000	0.954146830368329	-0.0677168002033	0.637179105196105	0.666666666666667	0.638460084475858
Com_532_pos	19-Norethisterone	È²ÅµÍª	15.11	C20H26O2	298.419	Others	ÆäËü	"68-22-4"	33930	56880	46910	65730	44190	61050	0.805521436509329	-0.312005112493	0.314669273432776	0.777777777777778	0.95057170822155
Com_533_pos	N-Methyl-L-arginine hydrochloride	N'-µ¥¼×»ù-L-¾«°±ËáÑÎËáÑÎ	0.95	C7H16N4O2	188.23	Amino Acid And Its Derivatives	°±»ùËá¼°ÆäÑÜÉúÎï	"156706-47-7"	139700	160700	120200	106800	130500	146300	1.09645464025026	0.132846129714	0.49503184462011	0.666666666666667	0.321627658549984
Com_534_pos	N-Tetradecanamide	N-ÕýÊ®ËÄÍé»ùï§	13.59	C14H29NO	227.386	Fatty Acyls	Ö¬·¾õ£Àà	"638-58-4"	586800	633200	670400	818500	702800	629100	0.879092261904762	-0.185913508805	0.242517169091233	0.777777777777778	1.34987321430021
Com_535_pos	5,6-Dihydro-5-methyluracil	5,6-¶þÇâÐØÏÙà×à¤	0.69	C5H8N2O2	128.13	Pyrimidines and pyrimidine derivatives	à×à¤¼°ÆäÑÜÉúÎï	"696-04-8"	994400	774100	934900	1704000	803800	1329000	0.704597581317765	-0.505128572406	0.294919096550135	0.777777777777778	1.13065509960964
Com_536_pos	N-Methylnicotinamine	N-¼×»ùÑÌõ£°·	1.82	C7H8N2O	136.15	Pyridine And Its Derivatives	ßÁà¤¼°ÆäÑÜÉúÎï	"114-33-0"	18020	28520	27050	17650	27150	17360	1.18388030888031	0.243523230871	0.452884229723573	0.777777777777778	0.66051444946505
Com_537_pos	Trigonelline	ºùÂ«°Í¼î	0.94	C7H7NO2	137.14	Alkaloids and derivatives	ÉúÎï¼î¼°ÆäÑÜÉúÎï	"535-83-1"	775300	822600	797500	515500	429400	540800	1.6123039644612	0.689123757936	0.0162229824788481	1	2.47359693109088
Com_538_pos	2-Piperidinone	2-ßßà¤Íª	4.15	C5H9NO	99.132	Organoheterocyclic compounds	ÓÐ»úÔÓ»·»¯ºÏÎï	"675-20-7"	78260	319600	136200	204200	124200	123100	1.18285714285714	0.242275845667	0.952192835991075	0.555555555555556	0.185476476955398
Com_539_pos	Phloretate	¶ÔôÇ»ù±½±ûËá	4.05	C9H10O3	166.177	Fatty Acyls	Ö¬·¾õ£Àà	"501-97-3"	9058000	6078000	9988000	8211000	9676000	7766000	0.979378630179706	-0.0300613777769	0.832993444971696	0.555555555555556	0.179732236560148
Com_53_neg	2-C-Methyl-D-erythritol 2,4-cyclodiphosphate	2-C-¼×»ù-D-³àÞºÌÇ´¼-2,4-»·¶þÁ×Ëáõ¥	0.89	C5H12O9P2	278.09	Organic oxygen compounds	ÓÐ»úÑõ»¯ºÏÎï	"143488-44-2"	1083000	761300	1087000	767500	733700	1140000	1.10983643798274	0.150347075226	0.57734183255495	0.555555555555556	0.609290534527773
Com_540_pos	Alpha-Linolenic acid	¦Á-ÑÇÂéËá	12.64	C18H30O2	278.435	Eicosanoid	Ñõ»¯Ö¬ÖÊ	"463-40-1"	153400	180500	165400	123300	140400	57630	1.55385429309433	0.635851226728	0.206198312744578	1	1.49082347828535
Com_541_pos	3-Methylindole	3-¼×»ùßÅßá	4.87	C9H9N	131.177	Indole And Its Derivatives	ßÅßá¼°ÆäÑÜÉúÎï	"83-34-1"	209500	171200	204400	217900	214400	173900	0.96519300560871	-0.0511106339651	0.741025951716964	0.777777777777778	0.222449348910491
Com_542_pos	isoleucine	ÒìÁÁ°±Ëá	2.11	C6H13NO2	131.17	Amino Acid And Its Derivatives	°±»ùËá¼°ÆäÑÜÉúÎï	"73-32-5"	124600000	62340000	172500000	125700000	163500000	112500000	0.89479711227284	-0.160367494409	0.61613846235927	0.555555555555556	0.557145359472035
Com_543_pos	Creatinine	¼¡Ëáôû	0.898	C4H7N3O	113.12	Organic Acid And Its Derivatives	ÓÐ»úËá¼°ÆäÑÜÉúÎï	"60-27-5"	2290000	2256000	2206000	2452000	2161000	2196000	0.991628726685269	-0.0121280291444	0.880003446809823	0.666666666666667	0.462204989220574
Com_544_pos	L-Citrulline	L-¹Ï°±Ëá	0.89	C6H13N3O3	175.19	Amino Acid And Its Derivatives	°±»ùËá¼°ÆäÑÜÉúÎï	"372-75-8"	300900	469600	339800	292900	319800	361700	1.13947044334975	0.188363503115	0.488345981619759	0.666666666666667	0.710801843637994
Com_545_pos	L-Leucine	L-ÁÁ°±Ëá	2.32	C6H13NO2	131.17	Amino Acid And Its Derivatives	°±»ùËá¼°ÆäÑÜÉúÎï	"61-90-5"	68240000	34450000	96350000	68670000	92410000	62720000	0.889365504915103	-0.169151645733	0.608639037845708	0.555555555555556	0.566196507452053
Com_546_pos	Urocanic acid	Äò¿¯Ëá	1.04	C6H6N2O2	138.12	Organic Acid And Its Derivatives	ÓÐ»úËá¼°ÆäÑÜÉúÎï	"104-98-3"	102500	161600	184000	72510	110500	97940	1.59494571987898	0.673507326188	0.113465664785152	0.888888888888889	1.79071113635664
Com_547_pos	D-Glutamine	D-¹È°±õ£°·	0.86	C5H10N2O3	146.14	Amino Acid And Its Derivatives	°±»ùËá¼°ÆäÑÜÉúÎï	"5959-95-5"	75750000	109300000	104800000	68840000	81540000	97990000	1.16700889801506	0.222815561108	0.381396862588831	0.777777777777778	0.999795745444168
Com_548_pos	L-Ornithine	Äñ°±Ëá	0.762	C5H12N2O2	132.16	Amino Acid And Its Derivatives	°±»ùËá¼°ÆäÑÜÉúÎï	"70-26-8"	612000	376200	652300	538400	553600	767300	0.882321303716453	-0.180623975537	0.542262897501452	0.444444444444444	0.797129963849603
Com_549_pos	LysoPE 18:2	ÈÜÑªÁ×Ö¬õ£ÒÒ´¼°· 18:2	12.08	C23H44NO7P	477.6	Phospholipid	Á×Ö¬		29340	33590	25340	28910	31550	14800	1.17286739303747	0.230039908318	0.487996455464598	0.666666666666667	0.738810076315696
Com_54_neg	Allolithocholic acid	±ðÊ¯µ¨Ëá	11.18	C24H40O3	376.579	Bile Acids	µ¨Ö­Ëá	"2276-93-9"	1957000	2946000	2992000	2178000	1548000	2776000	1.21424177176253	0.280055710057	0.406847414355346	0.777777777777778	0.791439027960925
Com_550_pos	LysoPC 10:0	ÈÜÑªÁ×Ö¬õ£µ¨¼î (1-õ£»ù10:0)	6.25	C18H38NO7P	411.3	Phospholipid	Á×Ö¬		10460	7506	5512	8166	10040	27750	0.510879972147271	-0.968943715521	0.282838031371966	0.777777777777778	1.36534510131865
Com_551_pos	2-Hydroxy-6-Aminopurine	2-ôÇ»ù-6-°±»ùàÑßÊ	2.76	C5H5N5O	151.126	Nucleotide And Its Derivates	ºËÜÕËá¼°ÆäÑÜÉúÎï	"3373-53-3"	411900	520200	635000	124300	444100	210700	2.01142343729945	1.00821682435	0.146280289943668	0.888888888888889	1.54985222327167
Com_552_pos	N-Acetyl-Dl-glutamic acid	N-ÒÒõ£-DL-¹È°±Ëá	1.84	C7H11NO5	189.166	Amino Acid And Its Derivatives	°±»ùËá¼°ÆäÑÜÉúÎï	"5817-08-3"	1590000	556400	821300	423400	486100	402300	2.26231132794633	1.17779747945	0.137756646534242	1	1.77656417832018
Com_553_pos	N6-Succinyl Adenosine	N6-çúçêõ£ÏÙÜÕ	4.54	C14H17N5O8	383.313	Nucleotide And Its Derivates	ºËÜÕËá¼°ÆäÑÜÉúÎï	"4542-23-8"	242000	135100	173700	118500	251300	117700	1.12984615384615	0.176126340611	0.627482519479202	0.666666666666667	0.484843523546367
Com_554_pos	N-Acetyl-L-histidine	N-ÒÒõ£-L-×é°±Ëá	1.0	C8H11N3O3	197.191	Amino Acid And Its Derivatives	°±»ùËá¼°ÆäÑÜÉúÎï	"2497-02-1"	35830000	55750000	42700000	48010000	61410000	43760000	0.876615746180964	-0.189983501431	0.448854959542355	0.777777777777778	0.976665441366913
Com_555_pos	2-Phenylglycine	DL-±½¸Ê°±Ëá	2.78	C8H9NO2	151.163	Amino Acid And Its Derivatives	°±»ùËá¼°ÆäÑÜÉúÎï	"2835-06-5"	391800	522900	647400	112200	452400	198300	2.04758159653952	1.0339209447	0.157252059830492	0.888888888888889	1.55348894510055
Com_556_pos	O-Acetyl-L-homoserine	O-ÒÒõ£»ù-L-¸ßË¿°±Ëá	1.0	C6H11NO4	161.16	Amino Acid And Its Derivatives	°±»ùËá¼°ÆäÑÜÉúÎï		17330000	19090000	12870000	13290000	14730000	21900000	0.987379807692308	-0.018322953191	0.991119382814664	0.444444444444444	0.0550286810603268
Com_557_pos	NG,NG-Dimethyl-L-arginine	N,N-¶þ¼×»ù¾«°±Ëá	0.93	C8H20Cl2N4O2	202.254	Amino Acid And Its Derivatives	°±»ùËá¼°ÆäÑÜÉúÎï	"220805-22-1"	164200	299100	179600	184400	99380	146000	1.49588161384895	0.580996002852	0.200335738471434	0.777777777777778	1.27974836646504
Com_558_pos	Cytarabine	°¢ÌÇ°ûÜÕ	1.0	C9H13N3O5	243.22	Nucleotide And Its Derivates	ºËÜÕËá¼°ÆäÑÜÉúÎï	"147-94-4"	650400	1231000	1002000	671100	737900	373000	1.61806958473625	0.694273651894	0.161402882302069	0.777777777777778	1.39076482967854
Com_559_pos	Cuminaldehyde	¿ÝÜøÈ©	4.06	C10H12O	148.2	Prenol lipids	Ï©´¼õ¥	"122-03-2"	198000	140400	211900	200000	203400	192200	0.923942243116185	-0.114125425253	0.53688683669483	0.555555555555556	0.647081473099699
Com_55_neg	Isolithocholic acid	ÒìÊ¯µ¨Ëá	13.06	C24H40O3	376.579	Bile Acids	µ¨Ö­Ëá	"1534-35-6"	11430	8816	7464	9082	29040	8205	0.598139314006951	-0.741446549897	0.4813625380375	0.666666666666667	0.98661283048692
Com_560_pos	Cytidine-5-Triphosphate	°ûÜÕ-5-ÈýÁ×Ëá	1.79	C9H16N3O14P3	483.16	Nucleotide And Its Derivates	ºËÜÕËá¼°ÆäÑÜÉúÎï	"36051-68-0"	9594	5769	3199	5607	11480	10079	0.683280571302363	-0.549449989711	0.332307507336831	0.777777777777778	0.829102955085444
Com_561_pos	2-Deoxy-D-galactose	2-ÍÑÑõ-D-°ëÈéÌÇ	0.69	C6H12O5	164.156	Carbohydrates And Its Derivatives	ÌÇÀà¼°ÆäÑÜÉúÎï	"1949-89-9"	3682000	3067000	2836000	2509000	3520000	3193000	1.03936239427456	0.0556987661436	0.756071991804126	0.444444444444444	0.348108229126449
Com_562_pos	dAMP	2'-ÍÑÑõÏÙÜÕ-5'-µ¥Á×Ëá	1.47	C10H14N5O6P	331.222	Nucleotide And Its Derivates	ºËÜÕËá¼°ÆäÑÜÉúÎï	"653-63-4"	2838000	2491000	2856000	3893000	3756000	3010000	0.767895675016418	-0.381017772691	0.0634757541802431	1	1.5588926077643
Com_563_pos	2-Methylbutyroylcarnitine	2-¼×»ù¶¡õ£Èâ¶¾¼î	5.45	C12H23NO4	245.315	Fatty Acyls	Ö¬·¾õ£Àà	"31023-25-3"	3364000	2540000	1681000	1810000	2984000	2861000	0.990855649902025	-0.0132531972528	0.929355137601819	0.555555555555556	0.0938592032898467
Com_564_pos	2'-Deoxyguanosine-5'-monophosphate	2-ÍÑÑõÄñÜÕ-5-µ¥Á×Ëá	1.66	C10H14N5O7P	347.221	Nucleotide And Its Derivates	ºËÜÕËá¼°ÆäÑÜÉúÎï	"312693-67-7"	15290	10700	13690	4003	10280	5064	2.0509639737427	1.03630215035	0.0939292161707229	1	2.02269085705488
Com_565_pos	L-2-Aminoadipic acid	°±»ù¼º¶þËá	0.91	C6H11NO4	161.156	Organic Acid And Its Derivatives	ÓÐ»úËá¼°ÆäÑÜÉúÎï	"542-32-5"	531500	247600	658400	428600	608000	517900	0.924734641363783	-0.112888660622	0.676148351730607	0.555555555555556	0.337437575620969
Com_566_pos	22(S)-Hydroxycholesterol	22(S)-ôÇ»ùµ¨¹Ì´¼	0.98	C27H46O2	402.653	Bile Acids	µ¨Ö­Ëá	"22348-64-7"	15600	9800	12040	12540	8080	5606	1.42759094028826	0.513582650964	0.235392020092338	0.777777777777778	1.06701105449484
Com_567_pos	2-Aminooctanoic acid	2-°±»ùÐÁËá	1.03	C8H17NO2	159.226	Organic Acid And Its Derivatives	ÓÐ»úËá¼°ÆäÑÜÉúÎï	"2187-07-7"	477700	397300	332200	339900	351000	501100	1.01275167785235	0.0182804751772	0.918637988788911	0.444444444444444	0.174621964450877
Com_568_pos	Hypotaurine	2-°±»ùÒÒÍéÑÇ»ÇËá	0.94	C2H7NO2S	109.147	Organic Acid And Its Derivatives	ÓÐ»úËá¼°ÆäÑÜÉúÎï	"300-84-5"	48570	58100	37320	69700	41170	42220	0.94055784179241	-0.0884114265232	0.838941879359371	0.444444444444444	0.253720997315703
Com_569_pos	2,6-Dimethylaniline	2,6-¶þ¼×»ù±½°·	4.07	C8H11N	121.18	Benzene and substituted derivatives	±½¼°ÆäÑÜÉúÎï	"87-62-7"	44830	20970	62960	49265	58940	53880	0.794398001048832	-0.332066102284	0.424336404823839	0.666666666666667	1.03623140586413
Com_56_neg	D-Mannose 6-phosphate	D-¸ÊÂ¶ÌÇ6-Á×Ëá	0.87	C6H13O9P	260.14	Carbohydrates And Its Derivatives	ÌÇÀà¼°ÆäÑÜÉúÎï	"3672-15-9"	418200000	150800000	137700000	373600000	489300000	269200000	0.624238141506934	-0.679831584984	0.243440201683164	0.777777777777778	1.28853658110906
Com_570_pos	2-(Formylamino)Benzoic Acid	2-(¼×õ£°±»ù)±½¼×Ëá	4.07	C8H7NO3	164.138	Benzoic Acid And Its Derivatives	±½¼×Ëá¼°ÆäÑÜÉúÎï	"3342-77-6"	14380000	9527000	15710000	13060000	15340000	12480000	0.96910469667319	-0.0452755600913	0.785956728359679	0.555555555555556	0.237065136991935
Com_571_pos	L-Cysteine-glutathione gisulfide	L-°ëë×°±Ëá¹Èë×¸ÊëÄ¶þÁò»¯Îï	0.96	C13H22N4O8S2	426.466	Amino Acid And Its Derivatives	°±»ùËá¼°ÆäÑÜÉúÎï	"13081-14-6"	79210	65210	183900	72710	52200	27880	2.14883172982525	1.10355251299	0.161047880607879	0.888888888888889	1.0145392950612
Com_572_pos	L-Cystathionine	L-ë×ÁòÃÑ	0.84	C7H14N2O4S	222.262	Amino Acid And Its Derivatives	°±»ùËá¼°ÆäÑÜÉúÎï	"56-88-2"	107600	144900	111200	68780	100000	59180	1.59545534304264	0.673968228001	0.0698458406041381	1	1.93778890724349
Com_573_pos	L-Methionine Methyl Ester	L-µ°°±Ëá¼×õ¥	0.95	C6H14ClNO2S	199.699	Amino Acid And Its Derivatives	°±»ùËá¼°ÆäÑÜÉúÎï	"2491-18-1"	190100	161600	133600	136300	134100	181800	1.07319770013268	0.101915868013	0.646067388855103	0.555555555555556	0.433014955420951
Com_574_pos	Methionine sulfoxide	µ°°±Ëáí¿	0.92	C5H11NO4S	181.21	Amino Acid And Its Derivatives	°±»ùËá¼°ÆäÑÜÉúÎï	"62697-73-8"	181300	128500	115900	99670	156900	155000	1.03433194839274	0.0486992644198	0.867030846461031	0.444444444444444	0.218211273293742
Com_575_pos	L-Saccharopine	L-½ÍÄ¸°±Ëá	1.03	C11H20N2O6	276.286	Amino Acid And Its Derivatives	°±»ùËá¼°ÆäÑÜÉúÎï	"997-68-2"	340900	122600	260500	410700	326500	248400	0.734577922077922	-0.445012558724	0.355221856655847	0.666666666666667	0.601997132360577
Com_576_pos	L-Methionine sulfone	L-µ°°±Ëáí¿	1.84	C5H11NO4S	181.21	Amino Acid And Its Derivatives	°±»ùËá¼°ÆäÑÜÉúÎï	"7314-32-1"	50680000	53710000	57370000	49760000	65620000	40130000	1.04019034145714	0.0568475471646	0.724945355479432	0.666666666666667	0.262167414968107
Com_577_pos	L-Tyrosine	L-ÀÒ°±Ëá	1.84	C9H11NO3	181.189	Amino Acid And Its Derivatives	°±»ùËá¼°ÆäÑÜÉúÎï	"60-18-4"	51650000	56910000	59640000	51050000	66640000	42030000	1.05309291259704	0.0746327285095	0.668620457874889	0.666666666666667	0.309685695931728
Com_578_pos	L-Canavanine	L-¶¹°±Ëá	2.96	C5H12N4O3	176.174	Amino Acid And Its Derivatives	°±»ùËá¼°ÆäÑÜÉúÎï	"543-38-4"	63500	33780	88850	56400	70040	16150	1.30535100638193	0.384437796892	0.541754042133572	0.666666666666667	0.817282392931154
Com_579_pos	L-Alanyl-L-Lysine	L-±û°±õ£-Àµ°±Ëá	2.57	C9H19N3O3	217.265	Amino Acid And Its Derivatives	°±»ùËá¼°ÆäÑÜÉúÎï	"5051-06-9"	67500	36110	23840	21630	28100	41830	1.39198339886413	0.477142005354	0.491830719566686	0.666666666666667	0.86482745586686
Com_57_neg	4-Hydroxy-6-methyl-2-pyrone	4-ôÇ»ù-6-¼×»ù-2-ßÁà«Íª	0.84	C6H6O3	126.11	Organoheterocyclic compounds	ÓÐ»úÔÓ»·»¯ºÏÎï	"675-10-5"	149700	353700	369700	206600	146200	221700	1.51975630983464	0.603840008683	0.353664467255735	0.777777777777778	0.999561627526875
Com_580_pos	Oleamide	ÓÍËáõ£°·	15.08	C18H35NO	281.5	Fatty Acyls	Ö¬·¾õ£Àà	"301-02-0"	93050000	134000000	128900000	194200000	131800000	131700000	0.777692811885515	-0.362727690686	0.22863554683877	0.777777777777778	1.36253147934686
Com_581_pos	Indole-3-acetamide	ßÅßá-3-ÒÒõ£°·	0.81	C10H10N2O	174.2	Indole And Its Derivatives	ßÅßá¼°ÆäÑÜÉúÎï	"879-37-8"	377200	933800	324500	399700	242500	277100	1.77907103230719	0.831124113703	0.281252272687986	0.777777777777778	0.991776437182866
Com_582_pos	Stachydrine	Ë®ËÕ¼î	0.97	C7H13NO2	143.18	Amino Acid And Its Derivatives	°±»ùËá¼°ÆäÑÜÉúÎï	"471-87-4"	2437000	2068000	1904000	2174000	1933000	2292000	1.00156274417878	0.00225280345728	0.989432180229396	0.555555555555556	0.256079676130715
Com_583_pos	2-Pyrrolidinone	2-ßÁ¿©ÍéÍª	2.04	C4H7NO	85.1	Organoheterocyclic compounds	ÓÐ»úÔÓ»·»¯ºÏÎï	"616-45-5"	517600	200100	647800	570700	676200	369500	0.844778520168275	-0.243354942531	0.577510587301337	0.666666666666667	0.634834076181121
Com_584_pos	7,8-dihydro-L-Biopterin	7,8-¶þÇâL-ÉúÎïµûßÊ	1.85	C9H13N5O3	239.23	Organoheterocyclic compounds	ÓÐ»úÔÓ»·»¯ºÏÎï	"6779-87-9"	12970	8380	6847	6334	12370	11060	0.947352506383551	-0.0780267477753	0.86505174975561	0.444444444444444	0.173803720287038
Com_585_pos	Acetylcarnitine	ÒÒõ£Èâ¼î	1.44	C9H17NO4	203.236	Carnitine	Èâ¼îÀà	"14992-62-2"	46810000	39870000	27420000	37930000	41500000	42950000	0.932341885929073	-0.101069012659	0.620892123053182	0.555555555555556	0.576368663436098
Com_586_pos	Acetylchloline Chloride	ÂÈ»¯ÒÒõ£µ¨¼î	0.9	C7H16NO2	146.21	Cholines	µ¨¼îÀà	"60-31-1"	200600	218100	147700	202100	107500	220700	1.06807467471243	0.0950125169423	0.723044589851841	0.555555555555556	0.395320262529503
Com_587_pos	Adipamide	¼º¶þõ£¶þ°·	0.84	C6H12N2O2	144.172	Hormones	¼¤ËØ	"628-94-4"	17510	12410	12570	24950	12760	12020	0.85441383470742	-0.226993087489	0.695663836260499	0.555555555555556	0.531170744837248
Com_588_pos	Ala-gly	L-±û°±õ£¸Ê°±Ëá	0.84	C5H10N2O3	146.144	Amino Acid And Its Derivatives	°±»ùËá¼°ÆäÑÜÉúÎï	"687-69-4"	6949000	10780000	10050000	6047000	7227000	9640000	1.21231561490792	0.277765339724	0.371351916125173	0.777777777777778	1.02729288931823
Com_589_pos	Adenylocuccinic Acid	ÏÙÜÕËá»ùçúçêËá	3.68	C14H18N5O11P	463.293	Organic Acid And Its Derivatives	ÓÐ»úËá¼°ÆäÑÜÉúÎï	"19046-78-7"	30900	25170	3456	220400	764800	196200	0.0503859827323514	-4.31083375476	0.0260651299533114	1	2.03351634678538
Com_58_neg	m-Coumaric acid	¼äÏã¶¹Ëá	1.83	C9H8O3	164.16	Cinnamic acids and derivatives	Èâ¹ðËá¼°ÆäÑÜÉúÎï	"588-30-7"	407500	457100	478700	363700	447800	342300	1.16423990292945	0.219388370192	0.189103464579337	0.888888888888889	0.850795092842804
Com_590_pos	S-adenosyl-L-methioninamine	S-ÏÙÜÕ-L-µ°°±Ëá°·	0.86	C15H22N6O5S	398.437	Amino Acid And Its Derivatives	°±»ùËá¼°ÆäÑÜÉúÎï	"91279-78-6"	24800	64870	78820	27540	23900	30180	2.06432246998285	1.04566835327	0.223095493862309	0.777777777777778	1.35916110311748
Com_591_pos	5-Methoxyindole-3-Carbaldehyde	4-¼×Ñõ»ù-ßÅßá-3-¼×È©	11.35	C10H9NO2	175.184	Indole And Its Derivatives	ßÅßá¼°ÆäÑÜÉúÎï	"10601-19-1"	230600	205700	259200	180600	220400	154600	1.25179985601152	0.324003915448	0.144218399485648	0.888888888888889	1.63160769040232
Com_592_pos	Protocatechualdehyde	Ô­¶ù²èÈ©	1.54	C7H6O3	138.12	Phenols And Its Derivatives	·ÓÀà¼°ÆäÑÜÉúÎï	"139-85-5"	68770	70380	34580	35650	95640	79240	0.825203058946468	-0.277178925725	0.698755775793813	0.777777777777778	0.546148374478866
Com_593_pos	Spermine	¾«°·	0.73	C10H26N4	202.34	Polyamine	¶à°·	"71-44-3"	5900000	2196000	2015000	3444000	5678000	2548000	0.866409597257926	-0.206878871055	0.635695625507923	0.666666666666667	0.273864489021488
Com_594_pos	Histamine	×é°·	0.699	C5H9N3	111.15	Amino Acid And Its Derivatives	°±»ùËá¼°ÆäÑÜÉúÎï	"51-45-6"	1472000	2330000	3084000	2503000	4193000	1609000	0.829139072847682	-0.27031398728	0.680983946887093	0.666666666666667	0.497853388428413
Com_595_pos	(+,-)-Octopamine HCl	ÕÂÓã°·	1.034	C8H12ClNO2	189.64	Polyamine	¶à°·	"770-05-8"	4722000	5666000	5365000	5373000	4998000	5454000	0.995450236966825	-0.00657889815367	0.918511926220144	0.555555555555556	0.331248598711123
Com_596_pos	Sepiapterin	Ä«à©ßÊ	0.84	C9H11N5O3	237.22	Organoheterocyclic compounds	ÓÐ»úÔÓ»·»¯ºÏÎï	"17094-01-8"	27860	22470	18070	30310	21310	11060	1.09125717932355	0.125991145301	0.668923993275296	0.555555555555556	0.493884181421128
Com_597_pos	11-cis-Retinol	11-Ë³ÊÓ»Æ´¼	12.17	C20H30O	286.5	Prenol lipids	Ï©´¼õ¥	"22737-96-8"	3485	5761	2777	2677	4076	10079	0.714294201520912	-0.485409684983	0.645911504216767	0.555555555555556	0.495055193878781
Com_598_pos	Quinone	±½õ«	7.24	C6H4O2	108.09	Ketones	ÍªÀà	"106-51-4"	38680	29050	31590	38450	37680	46240	0.811636839094549	-0.301093746337	0.123924499709028	0.777777777777778	1.04044748471713
Com_599_pos	L-Leucyl-L-alanine Hydrate	L-ÁÁ°±Ëá-L-±û°±Ëá	3.0	C9H18N2O3	202.25	Amino Acid And Its Derivatives	°±»ùËá¼°ÆäÑÜÉúÎï	"7298-84-2"	1240000	347300	462100	107100	346400	211100	3.0836593439663	1.62464339758	0.105053746079625	1	1.28903116425886
Com_59_neg	Isocitrate	ÒìÄûÃÊËá	1.46	C6H8O7	192.12	Organic Acid And Its Derivatives	ÓÐ»úËá¼°ÆäÑÜÉúÎï	"320-77-4"	1399000	2078000	2533000	2222000	1771000	348300	1.38437795130491	0.4692378693	0.441793476963465	0.666666666666667	1.04053870623915
Com_5_neg	Maltotriose	ÂóÑ¿ÈýÌÇ	0.7	C18H32O16	504.437	Carbohydrates And Its Derivatives	ÌÇÀà¼°ÆäÑÜÉúÎï	"1109-28-0"	1223000	1012000	961600	906400	1385000	1094000	0.944231110060849	-0.0827880779578	0.758550124235142	0.555555555555556	0.428663192582126
Com_600_pos	3-Amino-4-methylpentanoic acid	3-°±»ù-4-¼×»ùÎìËá	1.862	C6H13NO2	131.17	Organic Acid And Its Derivatives	ÓÐ»úËá¼°ÆäÑÜÉúÎï	"5699-54-7"	39650	35430	70040	63610	76620	36550	0.820907342459554	-0.284708703722	0.553752709521812	0.666666666666667	0.758941478703865
Com_601_pos	L-Lysine	L-Àµ°±Ëá	0.74	C6H14N2O2	146.19	Amino Acid And Its Derivatives	°±»ùËá¼°ÆäÑÜÉúÎï	"56-87-1"	89610000	133300000	118000000	75570000	96710000	112900000	1.19542043621572	0.257518111566	0.342051734993346	0.777777777777778	1.05449257499158
Com_602_pos	Cocamidopropyl Betaine	Ò¬ÓÍõ£°·±û»ùÌð²Ë¼î	9.91	C19H38N2O3	342.5	Amino Acid And Its Derivatives	°±»ùËá¼°ÆäÑÜÉúÎï	"86438-79-1"	266800	301700	237300	274000	237200	227700	1.09053999187982	0.125042676928	0.396440153719161	0.777777777777778	1.05842005242193
Com_603_pos	Thiamine	Áò°·ËØ	0.81	C12H17N4OS+	265.35	Vitamins	Î¬ÉúËØ	"70-16-6"	6843	18520	21550	5877	5960	4883	2.8058014354067	1.48841291406	0.119957152431587	1	1.95503996136823
Com_604_pos	Vitamin U	Î¬ÉúËØU	0.75	C6H14ClNO2S	199.7	Vitamins	Î¬ÉúËØ	"3493-12-7"	103500	157900	81660	130900	68050	53100	1.36107915096211	0.44475096646	0.360901056284	0.777777777777778	0.882604723485636
Com_605_pos	Acetylcholine	ÒÒõ£µ¨¼î	1.02	C7H16INO2	146.207	Cholines	µ¨¼îÀà	"51-84-3"	15350000	10240000	8462000	16230000	7184000	9705000	1.02817114043298	0.0400804229988	0.865010526260243	0.555555555555556	0.470682032721126
Com_606_pos	Metformin	¶þ¼×Ë«ëÒ	0.68	C4H11N5	129.165	Others	ÆäËü	"657-24-9"	788700	677900	687200	850400	839700	781400	0.871454582237508	-0.198502617786	0.0829960317379085	0.888888888888889	1.31701023595822
Com_607_pos	dGMP	2'-ÍÑÑõ-5'-ÄñÜÕËá	1.04	C10H14N5O7P	347.221	Nucleotide And Its Derivates	ºËÜÕËá¼°ÆäÑÜÉúÎï	"902-04-5"	16610	16770	9302	6773	47730	79440	0.318657936584965	-1.64991950152	0.417254271780708	0.666666666666667	0.945687083757922
Com_608_pos	S-Adenosyl-L-homocysteine	S-(5'-ÏÙÜÕ)-L-¸ß°ëë×°±Ëá	1.84	C14H20N6O5S	384.411	Amino Acid And Its Derivatives	°±»ùËá¼°ÆäÑÜÉúÎï	"979-92-0"	1100000	1527000	977400	1319000	1572000	1341000	0.851701323251418	-0.231580503649	0.320872171391956	0.777777777777778	0.793708840093751
Com_609_pos	thiamine phosphate	Á×ËáÁò°·ËØ	0.84	C12H18ClN4O4PS	380.787	Pyrimidines and pyrimidine derivatives	à×à¤¼°ÆäÑÜÉúÎï	"532-40-1"	82630	143100	167500	91320	91960	61250	1.60810534494745	0.68536191874	0.16353813137408	0.777777777777778	1.61676334444449
Com_60_neg	3-Oxo-7alpha,12alpha-hydroxy-5beta-cholanoic acid	3-ÍÑÇâµ¨Ëá	10.321	C24H38O5	406.562	Bile Acids	µ¨Ö­Ëá	"2304-89-4"	7364	6231	8801	10590	11160	13220	0.640434658278524	-0.642876710872	0.0252251943724938	1	1.75058966834166
Com_610_pos	L-arginino-succinate	L-¾«°±Ëá-çúçêËá	2.3	C10H18N4O6	290.273	Amino Acid And Its Derivatives	°±»ùËá¼°ÆäÑÜÉúÎï		53840	65110	42570	44930	52690	59380	1.0287898089172	0.0409482566651	0.899772912154299	0.555555555555556	0.209222857168629
Com_611_pos	L-Normetanephrine	¼×Ñõ»ùÈ¥¼×ÉöÉÏÏÙËØ	4.06	C9H13NO3	183.204	Hormones	¼¤ËØ	"97-31-4"	179300	105100	220300	180500	186200	160200	0.957866767887645	-0.0621030930751	0.734836576247853	0.555555555555556	0.371537508925103
Com_612_pos	Cystine	DL-ë×°±Ëá	0.84	C6H12N2O4S2	240.301	Amino Acid And Its Derivatives	°±»ùËá¼°ÆäÑÜÉúÎï	"923-32-0"	2714000	2382000	3032000	3310000	3164000	3584000	0.808112944919467	-0.307371151307	0.0701606589893586	1	1.55527578529378
Com_613_pos	D-Homocysteine	D-¸ß°ëë×°±Ëá	1.86	C4H9NO2S	135.185	Amino Acid And Its Derivatives	°±»ùËá¼°ÆäÑÜÉúÎï	"454-28-4"	181000	191500	230600	179100	248700	145600	1.05179630275549	0.0728553306195	0.714274800609936	0.666666666666667	0.355621051208606
Com_614_pos	Dimethyl fumarate	¸»ÂíËá¶þ¼×õ¥	0.9	C6H8O4	144.125	Fatty Acyls	Ö¬·¾õ£Àà	"624-49-7"	739000	494300	383800	503500	659300	523100	0.959190936591732	-0.060110068116	0.75675946439435	0.666666666666667	0.396221133271616
Com_615_pos	Adipic Acid	¼º¶þËá	0.84	C6H10O4	146.14	Fatty Acyls	Ö¬·¾õ£Àà	"124-04-9"	2768000	4294000	3921000	2403000	3025000	3701000	1.20308905685179	0.26674343979	0.373696973796922	0.777777777777778	1.0011415332794
Com_616_pos	Maleic Acid	ÂíÀ´Ëá	0.94	C4H4O4	116.07	Organic Acid And Its Derivatives	ÓÐ»úËá¼°ÆäÑÜÉúÎï	"110-16-7"	3222000	3837000	3102000	3218000	3459000	2936000	1.05700613752211	0.0799837537755	0.548930853780303	0.666666666666667	0.225054650317198
Com_617_pos	Pipecolinic Acid	D-ßßà¤Ëá	0.85	C6H11NO2	129.16	Amino Acid And Its Derivatives	°±»ùËá¼°ÆäÑÜÉúÎï	"1723-00-8"	893400	1528000	1373000	1206000	1064000	1237000	1.0819503849444	0.113634342939	0.772214228887912	0.666666666666667	0.542354440462236
Com_618_pos	Isonicotinamide	ÒìÑÌõ£°·	1.51	C6H6N2O	122.12	Pyridine And Its Derivatives	ßÁà¤¼°ÆäÑÜÉúÎï	"1453-82-3"	56250000	54790000	56950000	32330000	77810000	45850000	1.07692800820565	0.106921810071	0.638698695039246	0.666666666666667	0.662034661865283
Com_619_pos	2,6-Diaminooimelic Acid	2,6-¶þ°±»ù¸ý¶þËá	0.94	C7H14N2O4	190.2	Amino Acid And Its Derivatives	°±»ùËá¼°ÆäÑÜÉúÎï	"583-93-7"	80460	82170	56640	83100	46880	56890	1.17338256541981	0.23067346115	0.450283185966293	0.555555555555556	1.10195365481503
Com_61_neg	gamma-Muricholate	3a,6a,7a-ÈýôÇ»ù-5¦Â-µ¨Ëá	9.997	C24H40O5	408.57	Bile Acids	µ¨Ö­Ëá	"547-75-1"	7628	20605	17981	9208	20180	18236	0.970393079119772	-0.043358833748	0.886572886263721	0.555555555555556	0.419592002036006
Com_620_pos	1,3-Diaminopropane	1,3-¶þ°±»ù±ûÍé	0.65	C3H10N2	74.13	Amines	°·Àà	"109-76-2"	23860	33370	24560	23190	18040	8578	1.6421056858336	0.715546981879	0.190607771537481	1	1.5514159940609
Com_621_pos	trans-Cinnamic acid	·´Ê½Èâ¹ðËá	4.07	C9H8O2	148.16	Cinnamic acids and derivatives	Èâ¹ðËá¼°ÆäÑÜÉúÎï	"140-10-3"	131700	106300	161300	148900	163700	137300	0.887530562347188	-0.172131294946	0.39714065090896	0.777777777777778	0.749606976002605
Com_622_pos	Pyrrole-2-carboxylate	ßÁ¿©-2-ôÈËá	1.01	C5H5NO2	111.1	Organoheterocyclic compounds	ÓÐ»úÔÓ»·»¯ºÏÎï	"634-97-9"	446000	306200	549600	129900	564900	323900	1.2779032099735	0.353778568852	0.474945669788641	0.555555555555556	0.879252973071039
Com_623_pos	Oxypurinol	ôÇ»ùàÑßÊ	1.68	C5H4N4O2	152.11	Nucleotide And Its Derivates	ºËÜÕËá¼°ÆäÑÜÉúÎï	"2465-59-0"	500600	356400	773400	289000	467300	287500	1.56198505460816	0.643380649545	0.207574264920166	0.888888888888889	1.29498304243781
Com_624_pos	PAF C-16	¦¢-ÒÒõ£»ù-¦£-O-Ê®ÁùÍé»ù-L-¦¡-ÂÑÁ×Ö¬	13.8	C26H54NO7P	523.683	Phospholipid	Á×Ö¬	"74389-68-7"	55050	110300	89860	90160	138900	65390	0.866734589913398	-0.206337813593	0.675589965446448	0.666666666666667	0.53658311386567
Com_625_pos	N7-Methylguanosine	7-¼×»ùÄñÜÕ	4.15	C11H17N5O5	298.28	Nucleotide And Its Derivates	ºËÜÕËá¼°ÆäÑÜÉúÎï	"20244-86-4"	275600	249200	344800	256700	364300	298000	0.946245919477693	-0.0797129211491	0.717374104594382	0.666666666666667	0.48328904337473
Com_626_pos	7-Methylguanine	7-¼×»ùÄñàÑßÊ	4.09	C6H7N5O	165.153	Nucleotide And Its Derivates	ºËÜÕËá¼°ÆäÑÜÉúÎï	"578-76-7"	47180000	31910000	51080000	43050000	50460000	40850000	0.968815123548675	-0.0457067086966	0.784980020899707	0.555555555555556	0.226184450113078
Com_627_pos	7-Ketocholesterol	7-Íªµ¨¹Ì´¼	16.92	C27H44O2	400.637	Hormones	¼¤ËØ	"566-28-9"	108300	158700	111500	157900	107100	145500	0.92204628501827	-0.117088921792	0.650531213055333	0.444444444444444	0.409782662136774
Com_628_pos	Propionyl-L-carnitine	±ûõ£Èâ¼î	2.57	C10H19NO4	217.26	Carnitine	Èâ¼îÀà	"17298-37-2"	1133000	743800	540100	407800	558800	888900	1.30255995688494	0.38134978134	0.435754433547132	0.666666666666667	0.961195066363368
Com_629_pos	Punicic Acid	Ê¯ÁñËá	12.7	C18H30O2	278.43	Fatty Acyls	Ö¬·¾õ£Àà	"544-72-9"	254300	332200	277600	167100	264400	109400	1.59752264743945	0.675836383828	0.166429640646455	0.888888888888889	1.51767891883623
Com_62_neg	N alpha-Acetyl-L-Arginine	N¦Á-ÒÒõ£-L-¾«°±Ëá	1.03	C8H16N4O3	216.238	Amino Acid And Its Derivatives	°±»ùËá¼°ÆäÑÜÉúÎï	"155-84-0"	18600	28700	6774	26320	10630	19940	0.950500966777993	-0.0732400006121	0.791412910944513	0.555555555555556	0.468589097128338
Com_630_pos	Pro-Leu	¸¬°±Ëá-ÁÁ°±Ëá	1.72	C11H20N2O3	228.288	Amino Acid And Its Derivatives	°±»ùËá¼°ÆäÑÜÉúÎï	"52899-07-7"	6397000	5551000	11640000	15380000	15070000	9342000	0.592782468837957	-0.754425313395	0.126518932339599	0.888888888888889	1.71313865845236
Com_631_pos	Propionylcholine	±ûõ£µ¨¼î	1.03	C8H18NO2+	160.234	Cholines	µ¨¼îÀà	"5072-54-8"	798900	993200	708800	635000	612700	1019000	1.10332200997044	0.141853910049	0.582090520673773	0.666666666666667	0.551283700175997
Com_632_pos	p-Mentha-1,3,8-triene	¶Ô-±¡ºÉ-1,3,8-ÈýÏ©	11.37	C10H14	134.218	Fatty Acyls	Ö¬·¾õ£Àà	"18368-95-1"	1500000	1497000	1546000	1349000	1385000	1008000	1.21405665419562	0.279835746816	0.181975974242933	1	1.80464433721251
Com_633_pos	Porphobilinogen	µ¨É«ËØÔ­	4.9	C10H14N2O4	226.229	Organic nitrogen compounds	ÓÐ»úµª»¯ºÏÎï	"487-90-1"	241000	199600	246700	230000	249400	187500	1.03058929374719	0.0434695102777	0.777678698748773	0.555555555555556	0.169762381597446
Com_634_pos	4-Aminobenzoate	¶Ô-°±»ù±½¼×Ëá	2.74	C7H7NO2	137.136	Benzoic Acid And Its Derivatives	±½¼×Ëá¼°ÆäÑÜÉúÎï	"150-13-0"	6284000	9494000	4858000	1225000	6303000	5855000	1.54195621310618	0.624761797658	0.369055169716033	0.666666666666667	1.20400197400684
Com_635_pos	Picolinamide	ßÁà¤õ£°·	1.51	C6H6N2O	122.125	Pyridine And Its Derivatives	ßÁà¤¼°ÆäÑÜÉúÎï	"1452-77-3"	48490000	47790000	49060000	28210000	66930000	42170000	1.05848080984633	0.0819951136625	0.681261394623014	0.666666666666667	0.632988734332112
Com_636_pos	5-Methyl-2'-deoxycytidine	5-¼×»ù-2'-ÍÑÑõ°ûÜÕ	1.722	C10H15N3O4	241.24	Nucleotide And Its Derivates	ºËÜÕËá¼°ÆäÑÜÉúÎï	"838-07-3"	11310	12280	6993	17590	3879	9579	0.98502318989951	-0.0217704052836	0.800666660399625	0.555555555555556	0.534262163020329
Com_637_pos	Ethyl chrysanthemumate	¾ÕËáÒÒõ¥	1.18	C12H20O2	196.29	Organoheterocyclic compounds	ÓÐ»úÔÓ»·»¯ºÏÎï	"97-41-6"	7758000	7914000	8229000	3230000	7134000	5192000	1.53644895860118	0.619599840868	0.171641187403098	1	1.35965584047787
Com_638_pos	Guggulsterone	¹ÌçÞÍª	15.17	C21H28O2	312.446	Hormones	¼¤ËØ	"95975-55-6"	233200	200100	192600	173700	213500	170300	1.12269058295964	0.166960371249	0.277304321174488	0.777777777777778	0.758331279685276
Com_639_pos	4-Chloro-6-methoxy-2-(methylsulfinyl)pyrimidine	ÄñàÑßÊºËÜÕ	2.72	C10H13N5O5	283.241	Nucleotide And Its Derivates	ºËÜÕËá¼°ÆäÑÜÉúÎï	"85-30-3"	1308000	1567000	1780000	288500	1140000	589300	2.30696798493409	1.20599798309	0.126357535446717	1	1.68414204356752
Com_63_neg	L-Fucose	L-ÑÒÔåÌÇ	0.98	C6H12O5	164.156	Carbohydrates And Its Derivatives	ÌÇÀà¼°ÆäÑÜÉúÎï	"2438-80-4"	11100	11780	6801	4056	9769	11110	1.19033487066373	0.25136749646	0.56128211689123	0.666666666666667	0.778216618083797
Com_640_pos	Guanine	ÄñàÑßÊ	2.72	C5H5N5O	151.126	Nucleotide And Its Derivates	ºËÜÕËá¼°ÆäÑÜÉúÎï	"73-40-5"	211500	295500	365000	54300	268200	91900	2.1042471042471	1.07330413198	0.173028167867425	0.888888888888889	1.52749058590513
Com_641_pos	Imatinib	ÒÁÂíÌæÄá	11.76	C29H31N7O	493.603	Others	ÆäËü	"152459-95-5"	318000	213000	397900	190700	727900	98330	0.913435536369268	-0.130625177356	0.743161373086966	0.666666666666667	0.415155148640268
Com_642_pos	Hydrocortisone 17-butyrate	Çâ»¯¿ÉµÄËÉ¶¡Ëáõ¥	10.51	C25H36O6	432.55	Others	ÆäËü	"13609-67-1"	67350	102300	121200	65200	88680	74580	1.27308938107327	0.348333711544	0.343444010609716	0.777777777777778	1.20065106299433
Com_643_pos	Homoserine	Í¬ÐÍË¿°±Ëá	0.9	C4H9NO3	119.119	Amino Acid And Its Derivatives	°±»ùËá¼°ÆäÑÜÉúÎï	"1927-25-9"	10530000	5555000	13960000	11820000	15750000	13850000	0.725374215354901	-0.463202631687	0.292951044830815	0.777777777777778	1.12418805254226
Com_644_pos	Homocysteic acid	Í¬ÐÍ°ëë×°±Ëá	1.83	C4H9NO5S	183.18	Amino Acid And Its Derivatives	°±»ùËá¼°ÆäÑÜÉúÎï	"1001-13-4"	256900	321000	291000	249000	395700	216000	1.00952712908098	0.0136796808177	0.852089509977105	0.666666666666667	0.32832688458196
Com_645_pos	glutathione disulfide	L-¹Èë×¸ÊëÄ	1.81	C20H32N6O12S2	612.631	Amino Acid And Its Derivatives	°±»ùËá¼°ÆäÑÜÉúÎï	"27025-41-8"	370600	698600	492600	964500	1700000	283700	0.529746964249373	-0.916624679727	0.507394481289286	0.666666666666667	0.947401708134338
Com_646_pos	Phe-Pro	L-±½±û°±õ£-L-¸¬°±Ëá	5.58	C14H18N2O3	262.304	Amino Acid And Its Derivatives	°±»ùËá¼°ÆäÑÜÉúÎï	"7669-65-0"	249000	216500	289100	95380	91330	168000	2.12737165571876	1.08907209678	0.0409721109868086	1	1.76105502993576
Com_647_pos	Phe-Phe	L-±½±û°±Ëá-L-±½±û°±Ëá	6.51	C18H20N2O3	312.363	Amino Acid And Its Derivatives	°±»ùËá¼°ÆäÑÜÉúÎï	"2577-40-4"	92060	39130	55250	35500	82300	34890	1.2210360861877	0.288105837995	0.586241257092499	0.777777777777778	0.63233964959846
Com_648_pos	alpha-Nicotinamide adenine dinucleotide	¦Á-ÑÌõ£°·ÏÙàÑßÊ¶þºËÜÕËá	1.04	C21H27N7O14P2	663.425	Nucleotide And Its Derivates	ºËÜÕËá¼°ÆäÑÜÉúÎï	"7298-93-3"	32530000	28810000	33580000	39110000	35040000	35840000	0.862987544322211	-0.212588358049	0.0674168509657252	1	1.63419080180968
Com_649_pos	trans-3-Hydroxy-L-proline	·´-3-ôÇ»ù-L-¸¬°±Ëá	2.14	C5H9NO3	131.13	Amino Acid And Its Derivatives	°±»ùËá¼°ÆäÑÜÉúÎï	"4298-08-2"	4308000	2061000	5855000	4198000	5627000	3897000	0.890832240198222	-0.166774323097	0.610829560588909	0.555555555555556	0.55699571374326
Com_64_neg	Prostaglandin B2	Ç°ÁÐÏÙËØB2	0.7	C20H30O4	334.45	Hormones	¼¤ËØ	"13367-85-6"	134300	113000	78170	113000	123600	91120	0.993134383009886	-0.00993914995886	0.906093560136898	0.5	0.257638970268088
Com_650_pos	4-Acetamidobutanoate	4-ÒÒõ£°±»ù¶¡Ëá	1.03	C6H11NO3	145.156	Organic Acid And Its Derivatives	ÓÐ»úËá¼°ÆäÑÜÉúÎï	"3025-96-5"	38020	39140	42780	222500	58280	87760	0.325446355890812	-1.61950833481	0.135069461186815	1	1.24511818227176
Com_651_pos	Val-Ser	çÓ°±õ£-Ë¿°±Ëá	1.01	C8H16N2O4	204.224	Amino Acid And Its Derivatives	°±»ùËá¼°ÆäÑÜÉúÎï	"13588-94-8"	198800	125900	243300	71990	96500	65000	2.43265236198552	1.28253016677	0.0269912617806388	1	2.06400465288185
Com_652_pos	L-Alanine	L-±û°±Ëá	0.86	C3H7NO2	89.09	Amino Acid And Its Derivatives	°±»ùËá¼°ÆäÑÜÉúÎï	"56-41-7"	18440000	18470000	20440000	22430000	18740000	19060000	0.95218329736012	-0.0706887726798	0.529266386243685	0.777777777777778	0.496519472816102
Com_653_pos	L-Aspartic acid	L-Ìì¶¬°±Ëá	0.86	C4H7NO4	133.1	Amino Acid And Its Derivatives	°±»ùËá¼°ÆäÑÜÉúÎï	"56-84-8"	5850000	6438000	10240000	5819000	7151000	9074000	1.02195608782435	0.0313332068048	0.975554030507974	0.444444444444444	0.405746780642713
Com_654_pos	beta-Nicotinamide mononucleotide	¦Â-ÑÌõ£°·µ¥ºËÜÕËá	0.993	C11H15N2O8P	334.219	Nucleotide And Its Derivates	ºËÜÕËá¼°ÆäÑÜÉúÎï	"1094-61-7"	872200	693800	1049000	250300	912500	363900	1.71284469771402	0.776394349323	0.213804552107165	0.777777777777778	1.56962824695019
Com_655_pos	Creatine	¼¡Ëá	0.94	C4H9N3O2	131.133	Organic Acid And Its Derivatives	ÓÐ»úËá¼°ÆäÑÜÉúÎï	"57-00-1"	329000000	287700000	313300000	331900000	327700000	289900000	0.979462875197472	-0.0299372841541	0.743602125769373	0.666666666666667	0.48511892931491
Com_656_pos	Choline Glycerophosphate	¸ÊÓÍÁ×Ö¬µ¨¼î	0.89	C8H20NO6P	257.22	Cholines	µ¨¼îÀà	"28319-77-9"	14160000	6951000	9862000	23200000	22790000	8393000	0.569534597208686	-0.81214461168	0.280826688736501	0.777777777777778	1.32225576809315
Com_657_pos	DL-Citrulline	DL-¹Ï°±Ëá	0.9	C6H13N3O3	175.19	Amino Acid And Its Derivatives	°±»ùËá¼°ÆäÑÜÉúÎï	"627-77-0"	1166000	1963000	1138000	1101000	1153000	1187000	1.24004649811101	0.310394218464	0.412978802214419	0.666666666666667	0.869125663636282
Com_658_pos	4-Aminobutyric acid	¦Ã-°±»ù¶¡Ëá	0.864	C4H9NO2	103.12	Organic Acid And Its Derivatives	ÓÐ»úËá¼°ÆäÑÜÉúÎï	"56-12-2"	294200	392300	397100	341500	278000	209300	1.30743243243243	0.386736390515	0.190411072240908	0.888888888888889	1.27129674940789
Com_659_pos	Glycine	¸Ê°±Ëá	0.88	C2H5NO2	75.07	Amino Acid And Its Derivatives	°±»ùËá¼°ÆäÑÜÉúÎï	"56-40-6 "	408000	414400	577700	526800	281200	345900	1.21336337637577	0.279011671471	0.38778261966734	0.777777777777778	0.747594900788056
Com_65_neg	Uridine 5'-Diphospho-N-Acetylgalactosamine	ÄòÜÕ-5'-¶þÁ×Ëá-N-ÒÒõ£»ù°±»ù°ëÈéÌÇ	1.0	C17H27N3O17P2	607.354	Nucleotide And Its Derivates	ºËÜÕËá¼°ÆäÑÜÉúÎï	"7277-98-7"	2237000	2188000	2107000	2401000	3467000	2094000	0.820396885204723	-0.28560608053	0.364969095211967	0.666666666666667	0.707287979895362
Com_660_pos	L-Arginine	¾«°±Ëá	0.794	C6H14N4O2	174.2	Amino Acid And Its Derivatives	°±»ùËá¼°ÆäÑÜÉúÎï	"74-79-3"	8006000	22670000	7954000	8593000	5831000	5499000	1.93896501530894	0.955286773174	0.249596824445726	0.777777777777778	1.08828554596573
Com_661_pos	L-Cysteine	L-°ëë×°±Ëá	0.88	C3H7NO2S	121.16	Amino Acid And Its Derivatives	°±»ùËá¼°ÆäÑÜÉúÎï	"52-90-4"	476200	295800	531900	380600	372300	346000	1.18655018655019	0.246773122324	0.515764248578054	0.666666666666667	0.848455902877563
Com_662_pos	Nicotinate ribonucleoside	ÑÌËáºËÜÕ	1.04	C11H13NO6	255.224	Carbohydrates And Its Derivatives	ÌÇÀà¼°ÆäÑÜÉúÎï	"17720-18-2"	20420	17750	46380	24200	18270	28940	1.18400784203893	0.2436786364	0.800963887427926	0.555555555555556	0.2463303855582
Com_663_pos	S-Methyl-L-cysteine	S-¼×»ù-L-°ëë×°±Ëá	1.04	C4H9NO2S	135.185	Amino Acid And Its Derivatives	°±»ùËá¼°ÆäÑÜÉúÎï	"1187-84-4"	628600	527200	486000	2853000	1587000	1558000	0.273724574858286	-1.86920312992	0.01462051619789	1	2.11355356518714
Com_664_pos	MAG (18:2)	µ¥õ£¸ÊÓÍõ¥ (õ£»ù 18:2)	14.64	C21H38O4	354.1	Glycerolipids	¸ÊÓÍÖ¬Àà		10770	11670	13080	8823	16340	10010	1.00986552184915	0.0141631901271	0.842544708748986	0.666666666666667	0.279286462791145
Com_665_pos	Tetraethylammonium fluoride dihydrate	°ûà×à¤ºËÜÕ	1.04	C8H20FN	149.25	Nucleotide And Its Derivates	ºËÜÕËá¼°ÆäÑÜÉúÎï	"63123-01-3"	672900	655900	760700	673100	457900	324500	1.43558914462384	0.5216429192	0.19107319177251	0.777777777777778	1.49006669439391
Com_666_pos	Cholesterol	µ¨¹Ì´¼	11.2	C27H46O	386.654	Hormones	¼¤ËØ	"57-88-5"	447000	362200	374300	445100	318900	382500	1.03227213257741	0.0458233511538	0.770803099795625	0.444444444444444	0.741107496324393
Com_667_pos	5'-Deoxy-5'-(methylthio)adenosine	5-ÍÑÑõ-5-¼×ÁòÏÙÜÕ	4.91	C11H15N5O3S	297.333	Nucleotide And Its Derivates	ºËÜÕËá¼°ÆäÑÜÉúÎï	"2457-80-9"	730600	615800	681300	787900	885800	641800	0.875707190671561	-0.191479536913	0.319518515081172	0.777777777777778	1.13456394131367
Com_668_pos	L-Valine	L-çÓ°±Ëá	1.2	C5H11NO2	117.146	Amino Acid And Its Derivatives	°±»ùËá¼°ÆäÑÜÉúÎï	"72-18-4"	1876000	1002000	2559000	2329000	2702000	1710000	0.80655689066904	-0.310151797103	0.448177381118414	0.666666666666667	0.765309583026591
Com_669_pos	Hypoxanthine-9-beta-D-Arabinofuranoside	°¢ÌÇ¼¡ÜÕ	2.58	C10H12N4O5	268.226	Nucleotide And Its Derivates	ºËÜÕËá¼°ÆäÑÜÉúÎï	"7013-16-3"	19370000	27750000	15030000	3865000	19280000	15110000	1.62462423212652	0.70010606821	0.319467226559318	0.777777777777778	1.24847493321958
Com_66_neg	D-Glucuronic acid	ÆÏÌÑÌÇÈ©Ëá	0.894	C6H10O7	194.14	Sugar Acids And Its Derivatives	ÌÇËá¼°ÆäÑÜÉúÎï	"6556-12-3"	33610	76680	54830	48750	37170	52330	1.19435804701627	0.256235395414	0.648913141157301	0.666666666666667	0.536822319811814
Com_670_pos	4-aminobutyrate	4-°±»ù¶¡Ëáõ¥	0.84	C4H9NO2	103.12	Organic Acid And Its Derivatives	ÓÐ»úËá¼°ÆäÑÜÉúÎï		91740	165700	118400	120900	74390	78300	1.37373442011769	0.458103119284	0.246713270130637	0.777777777777778	1.28308740577567
Com_671_pos	3-Methylhistidine	3-N-¼×»ù-L-×é°±Ëá	0.76	C7H13N3O3	169.181	Amino Acid And Its Derivatives	°±»ùËá¼°ÆäÑÜÉúÎï	"368-16-1"	34620000	25220000	35370000	35870000	34930000	33970000	0.908752505488212	-0.138040658248	0.43168721641702	0.666666666666667	0.768675684299734
Com_672_pos	3-OH-anthranilate	3-ôÇ»ù-ÁÚ°±»ù±½¼×Ëáõ¥	1.68	C7H7NO3	153.14	Organic Acid And Its Derivatives	ÓÐ»úËá¼°ÆäÑÜÉúÎï		273200	351900	480400	239300	319000	399100	1.15468978483393	0.207505313984	0.563567954406614	0.666666666666667	0.55416587701445
Com_673_pos	3-Methoxytyramine	3-¼×ÑõÀÒ°·	18.4	C9H13NO2	167.205	Phenols And Its Derivatives	·ÓÀà¼°ÆäÑÜÉúÎï	"554-52-9"	243600	246400	252400	194600	173800	202900	1.2994923857868	0.377948180544	0.0246610159182495	1	1.88019000376557
Com_674_pos	3-Nitro-L-Tyrosine	3-Ïõ»ù-L-ÀÒ°±Ëá	8.98	C9H10N2O5	226.186	Amino Acid And Its Derivatives	°±»ùËá¼°ÆäÑÜÉúÎï	"621-44-3"	137400	118100	123300	121700	114100	122600	1.05691964285714	0.0798656934108	0.365317624907156	0.777777777777778	1.1187812532125
Com_675_pos	3-amino isobutanoate	3-°±»ùÒì¶¡Ëáõ¥	0.91	C4H9NO2	103.12	Amino Acid And Its Derivatives	°±»ùËá¼°ÆäÑÜÉúÎï		27490	22520	21830	30490	28820	21310	0.891094021334657	-0.16635043311	0.465413741570307	0.666666666666667	0.507087743510272
Com_676_pos	3-Guanidinopropanoate	3-ëÒ»ù±ûËá	0.9	C4H9N3O2	131.133	Organic nitrogen compounds	ÓÐ»úµª»¯ºÏÎï	"353-09-3"	9481000	8512000	8990000	9682000	9555000	9514000	0.938506486730896	-0.091561378236	0.171178663393184	1	0.882806928388018
Com_677_pos	3,5-Diiodo-L-thyronine	3,5-¶þµâ-L-¼××´ÏÙËØ	0.71	C15H13I2NO4	525.077	Organic Acid And Its Derivatives	ÓÐ»úËá¼°ÆäÑÜÉúÎï	"1041-01-6"	45110	30270	31520	33500	26410	31150	1.17395124094004	0.231372488589	0.378110443387966	0.666666666666667	0.555367968347608
Com_678_pos	3'-Adenylic acid	ÏÙÜÕ-3'-Á×Ëá	5.13	C10H14N5O7P	347.221	Nucleotide And Its Derivates	ºËÜÕËá¼°ÆäÑÜÉúÎï	"84-21-9"	485100	407500	444500	647100	537200	287900	0.908232577095503	-0.138866309643	0.87711811234318	0.666666666666667	0.333329348305627
Com_67_neg	L-Lactic acid	L-ÈéËá	1.487	C3H6O3	90.08	Organic Acid And Its Derivatives	ÓÐ»úËá¼°ÆäÑÜÉúÎï	"79-33-4"	2225000	2605000	2498000	2162000	2865000	2505000	0.972915560276155	-0.0396134965173	0.82096386996926	0.555555555555556	0.680597968600936
Com_68_neg	L-Malate	Æ»¹ûËá	1.089	C4H6O5	134.09	Tca Cycle	ÈýôÈËáÑ­»·	"97-67-6"	9887000	14740000	8781000	11490000	11750000	16210000	0.846844106463878	-0.239831683218	0.409857203887407	0.777777777777778	1.01705614582102
Com_69_neg	3-Methyladipic acid	3-¼×»ù¼º¶þËá	5.747	C7H12O4	160.17	Fatty Acyls	Ö¬·¾õ£Àà	"3058-01-3"	221400	247700	213000	214200	228600	195700	1.06828504306969	0.0952966426765	0.359743669214366	0.666666666666667	0.806195613817457
Com_6_neg	12(S)-HETE	12-ôÇ¶þÊ®ÍéËÄÏ©Ëá	13.03	C20H32O3	320.466	Eicosanoid	Ñõ»¯Ö¬ÖÊ	"54397-83-0"	11510	6605	10560	3499	7992	2488	2.05129122254811	1.03653232629	0.127806021110023	0.888888888888889	1.73769779139433
Com_70_neg	CTP	5'-ÈýÁ×Ëá°ûÜÕ	0.87	C9H16N3O14P3	483.156	Nucleotide And Its Derivates	ºËÜÕËá¼°ÆäÑÜÉúÎï	"65-47-4"	112300	216200	208300	114400	128400	120700	1.4767537826685	0.562429307393	0.239858275826136	0.666666666666667	1.30851562576413
Com_71_neg	Prostaglandin H2	Ç°ÁÐÏÙËØH2	9.33	C20H32O5	352.465	Hormones	¼¤ËØ	"42935-17-1"	15470	20830	4618	3965	16330	4938	1.62160662624341	0.697423889101	0.466126975429616	0.666666666666667	0.665771700620305
Com_72_neg	Prostaglandin D2	Ç°ÁÐÏÙËØD2	9.34	C20H32O5	352.465	Hormones	¼¤ËØ	"41598-07-6"	13660	21160	4851	3879	16340	7639	1.42404336276833	0.509993077694	0.588145700277052	0.666666666666667	0.503276774134108
Com_73_neg	Phosphocreatine	¼¡ËáÁ×Ëá	0.91	C4H10N3O5P	211.113	Organic Acid And Its Derivatives	ÓÐ»úËá¼°ÆäÑÜÉúÎï	"67-07-2"	1321000	483300	48090	617500	54810	58850	2.53349472071776	1.34112882258	0.51185355482055	0.555555555555556	0.95799113478566
Com_74_neg	L-Histidine	L-×é°±Ëá	0.76	C6H9N3O2	155.15	Amino Acid And Its Derivatives	°±»ùËá¼°ÆäÑÜÉúÎï	"71-00-1"	3006000	5717000	4009000	4157000	5506000	4560000	0.895169795401814	-0.159766736812	0.5488587709677	0.666666666666667	0.930111034343793
Com_75_neg	D-threo-Isocitric acid	D-ËÕ°±Ëá-ÒìÄûÃÊËá	1.41	C6H8O7	192.124	Organic Acid And Its Derivatives	ÓÐ»úËá¼°ÆäÑÜÉúÎï	"6061-97-8"	77960	141700	162500	187800	137200	17980	1.1142340661263	0.156052330136	0.608252079615639	0.555555555555556	0.645700917448424
Com_76_neg	Stearic acid	Ó²Ö¬Ëá	2.27	C18H36O2	284.477	Fatty Acyls	Ö¬·¾õ£Àà	"57-11-4"	857500	328700	1824000	644100	1255000	736600	1.14208749098911	0.191673174327	0.933690351957334	0.555555555555556	0.141569963810482
Com_77_neg	3'-Dephospho-CoA	3'-Á×Ëá¸¨Ã¸A	4.47	C21H35N7O13P2S	687.554	Co-Enzyme Factor	¸¨Ã¸Òò×Ó	"3633-59-8"	68900	95320	86550	9181	70530	18180	2.56172681860437	1.35711663553	0.160667373524983	0.888888888888889	1.50535562020929
Com_78_neg	L-Homoserine	L-¸ßË¿°±Ëá	1.9	C4H9NO3	119.119	Amino Acid And Its Derivatives	°±»ùËá¼°ÆäÑÜÉúÎï	"672-15-1"	12700	29860	3819	36940	48310	24310	0.423320554947061	-1.24017755237	0.189964767617913	0.888888888888889	1.62707541672408
Com_79_neg	DL-o-Tyrosine	DL-O-ÀÒ°±Ëá	1.81	C9H11NO3	181.189	Organic Acid And Its Derivatives	ÓÐ»úËá¼°ÆäÑÜÉúÎï	"2370-61-8"	5914000	6469000	6976000	4529000	6535000	3990000	1.28597050617776	0.362857554735	0.200572820612626	0.777777777777778	0.856253031111086
Com_80_neg	D-Lactic acid	D-ôÇ»ù±ûËá	1.44	C3H6O3	90.08	Organic Acid And Its Derivatives	ÓÐ»úËá¼°ÆäÑÜÉúÎï	"10326-41-7"	2283000	2395000	2166000	2157000	2548000	2385000	0.965303244005642	-0.0509458676375	0.588089364354127	0.555555555555556	0.409720618491014
Com_81_neg	Dihydroxyacetone phosphate	Á×Ëá¶þôÇ»ù±ûÍª	0.9	C3H7O6P	170.058	Carbohydrates And Its Derivatives	ÌÇÀà¼°ÆäÑÜÉúÎï	"57-04-5"	969200	435188	121600	6886000	870400	502800	0.184762204571871	-2.43625842933	0.250905245090833	0.777777777777778	1.33082031597605
Com_82_neg	Sucrose	D-ÕáÌÇ	0.99	C12H22O11	342.297	Carbohydrates And Its Derivatives	ÌÇÀà¼°ÆäÑÜÉúÎï	"57-50-1"	116900	69820	54550	122800	55800	76780	0.944749001487979	-0.0819970061961	0.870720649008704	0.666666666666667	0.488030516121172
Com_83_neg	D-Ribose 5-phophate	D-ºËÌÇ-5-Á×Ëá	0.89	C5H11O8P	230.11	Organic Acid And Its Derivatives	ÓÐ»úËá¼°ÆäÑÜÉúÎï	"207671-46-3"	4132000	8787000	8340000	1851000	5397000	3683000	1.94483578812551	0.959648346647	0.155443850482108	0.888888888888889	1.31364815866538
Com_84_neg	D-Xylulose 5-phosphate	D-Ä¾ÍªÌÇ-5-Á×Ëá	0.9	C5H11O8P	230.11	Carbohydrates And Its Derivatives	ÌÇÀà¼°ÆäÑÜÉúÎï	"4212-65-1"	7888000	17700000	19000000	2959000	10630000	7248000	2.13984738685991	1.09750790781	0.164210790495455	0.888888888888889	1.34898178864105
Com_85_neg	D-Xylonate	Ä¾ÌÇËá	0.91	C5H10O6	166.129	Organic Acid And Its Derivatives	ÓÐ»úËá¼°ÆäÑÜÉúÎï	"526-91-0"	1372000	1617000	1311000	1359000	1870000	1798000	0.855380942908295	-0.225361029219	0.285812168831269	0.777777777777778	0.950091556142446
Com_86_neg	dUMP	ÍÑÑõÄòÜÕËá	0.92	C9H13N2O8P	308.182	Nucleotide And Its Derivates	ºËÜÕËá¼°ÆäÑÜÉúÎï	"964-26-1"	44650	77360	55260	252700	62470	195300	0.347268203812173	-1.52587777257	0.152314713668068	0.888888888888889	1.63815361276954
Com_87_neg	Fosfomycin	Á×Ã¹ËØ	11.02	C3H7O4P	138.059	Organic Acid And Its Derivatives	ÓÐ»úËá¼°ÆäÑÜÉúÎï	"23155-02-4"	35180	34690	32440	35700	39340	34910	0.930513869940882	-0.103900440094	0.192925202097806	0.888888888888889	1.02217777544242
Com_88_neg	Ethylmalonate	ÒÒ»ù±û¶þËá	6.37	C5H8O4	132.115	Organic Acid And Its Derivatives	ÓÐ»úËá¼°ÆäÑÜÉúÎï	"601-75-2"	11600	12750	15370	15880	18220	22460	0.702263083451202	-0.509916497281	0.0571269451569802	1	1.52222420701449
Com_89_neg	Thymidine 3,5-cyclic monophosphate	ÐØÜÕ3,5-»·µ¥Á×Ëá	4.2	C10H13N2O7P	304.193	Nucleotide And Its Derivates	ºËÜÕËá¼°ÆäÑÜÉúÎï	"6453-60-7"	23090	28510	27160	24050	26630	29340	0.984253936515871	-0.022897517444	0.856307168556012	0.444444444444444	0.518568580629862
Com_8_neg	1-Caffeoylquinic Acid	1-¿§·Èõ£¿üÄþËá	18.71	C16H18O9	354.309	Organic Acid And Its Derivatives	ÓÐ»úËá¼°ÆäÑÜÉúÎï	"1241-87-8"	2650000	2232000	2039000	2504000	2677000	2997000	0.846294937637564	-0.240767558122	0.151021006683704	0.888888888888889	1.28472078524051
Com_90_neg	Methylmalonate	¼×»ù±û¶þËá	1.938	C4H6O4	118.09	Organic Acid And Its Derivatives	ÓÐ»úËá¼°ÆäÑÜÉúÎï	"516-05-2"	2776000	5502000	923400	8053000	8741000	5341000	0.415694601310142	-1.26640408331	0.161907184775986	0.888888888888889	1.71365043919664
Com_91_neg	Dulcitol	¼ºÁù´¼	0.897	C6H14O6	182.17	Carbohydrates And Its Derivatives	ÌÇÀà¼°ÆäÑÜÉúÎï	"608-66-2"	8088	9096	6608	23310	13940	11680	0.486245657061108	-1.04024273027	0.0628832004879729	1	1.72236791789398
Com_92_neg	Gluconolactone	ÆÏÌÇËáÄÚõ¥	1.02	C6H10O6	178.14	Amino Acid And Its Derivatives	°±»ùËá¼°ÆäÑÜÉúÎï	"90-80-2"	45090	45130	51940	30990	37370	27010	1.49061549753591	0.57590816417	0.0318884375843113	1	1.7093540011425
Com_93_neg	Sebacic acid	¹ï¶þËá	8.111	C10H18O4	202.248	Organic Acid And Its Derivatives	ÓÐ»úËá¼°ÆäÑÜÉúÎï	"111-20-6"	353100	461200	374200	352300	417100	359800	1.05251505490613	0.0738408693801	0.654739298751228	0.666666666666667	0.610950554722272
Com_94_neg	Tiglic acid	Ìè¸÷Ëá	1.07	C5H8O2	100.116	Fatty Acyls	Ö¬·¾õ£Àà	"80-59-1"	573800	584200	783700	668600	473400	501100	1.181729657355	0.24090002993	0.316763192981934	0.777777777777778	0.620592359255046
Com_95_neg	4-Hydroxyphenylpyruvate	4-ôÇ±½»ù±ûÍªËá	1.38	C9H8O4	180.16	Benzene and substituted derivatives	±½¼°ÆäÈ¡´úÑÜÉúÎï	"156-39-8"	272400	291800	280800	522300	354800	364400	0.680628272251309	-0.555061015007	0.094194607045334	1	1.71027155854437
Com_96_neg	Oxaloacetate	²Ýõ£ÒÒËá	0.71	C4H4O5	132.072	Organic Acid And Its Derivatives	ÓÐ»úËá¼°ÆäÑÜÉúÎï	"328-42-7"	2265000	2675000	3044000	2464000	3196000	2931000	0.929344663019439	-0.105714351442	0.55059777810023	0.666666666666667	0.48256062411226
Com_97_neg	Tetrahydroaldosterone	ËÄÇâÈ©çÞÍª	0.97	C21H32O5	364.476	Hormones	¼¤ËØ	"13489-75-3"	11240	7988	18220	4872	4691	3767	2.8093023255814	1.49021188974	0.0431495817430192	1	2.244422437299
Com_98_neg	Tolfenamic acid	ÍÐÃðËá	2.15	C14H12ClNO2	261.7	Benzoic Acid And Its Derivatives	±½¼×Ëá¼°ÆäÑÜÉúÎï	"13710-19-5"	157700	106296	53750	164400	214900	109211	0.650437758822217	-0.620517084577	0.273453667155745	0.888888888888889	1.26317826129747
Com_99_neg	3-PRENYL-4-HYDROXYACETOPHENONE	3-ÒìÎìÏ©-4-ôÇ»ù±½ÒÒÍª	3.76	C13H16O2	204.26	Ketones	ÍªÀà	"26932-05-8"	100300	256100	106600	140300	86260	159400	1.19960617680589	0.262560855816	0.762458473950646	0.444444444444444	0.297747355703074
Com_9_neg	D-Glucose 6-phosphate	D-ÆÏÌÑÌÇ-6-Á×Ëá	0.92	C6H13O9P	260.136	Carbohydrates And Its Derivatives	ÌÇÀà¼°ÆäÑÜÉúÎï	"56-73-5"	455500000	139600000	141000000	433900000	533400000	276000000	0.59205340625754	-0.756200774662	0.234247707244277	0.777777777777778	1.31868803149737
