# Supplementary material for: Association analysis of transcriptome and quasi-targeted metabolomics reveals the regulation mechanism underlying broiler muscle tissue development at different levels of dietary guanidinoacetic acid
Source: Frontiers journal article supplement (doi:10.3389/fvets.2024.1384028), 2024-04-25
Supplement: Data_Sheet_1.ZIP [file High_GAA.vs.No_GAA_all_corr.xls]

corr	dGDP	IDP	Adenosine 5'-Diphosphate	APS	Adenine	S-Methyl-L-cysteine	L-Cysteinesulfinic acid	Trigonelline	5-Hydroxyhexanoic Acid	N-Acetyl-L-methionine	2-Hydroxyisocaproic Acid	Methyl beta-D-galactopyranoside	Sorbitol	Sedoheptulose 7-phosphate	3-Methoxytyramine	3-Oxo-7alpha,12alpha-hydroxy-5beta-cholanoic acid	Adenylocuccinic Acid	Val-Ser	Gluconolactone	N-Acetyl-D-glucosamine 6-phosphate	Ala-trp	Nonadecanoic acid	Phe-Pro	Tetrahydroaldosterone	5-Hydroxyindoleacetate	Asp-Phe methyl ester	CDP	N-Acetylglucosamine 1-phosphate
dGDP	1	0.93168163895252	0.999348187298747	0.998758477890216	0.992019098100054	0.98262087004566	-0.635284615155706	-0.698730039747892	0.777027937353843	-0.747698978302229	0.463213208645392	-0.713060088017258	0.942812885185889	-0.700629617378923	-0.672191550561774	0.585039504539021	0.285862020229643	-0.698545565105704	-0.767436144950208	-0.858017744794863	0.701182581220154	0.833119624043757	-0.763191239739431	-0.599188784054739	-0.527872591233096	-0.937435401433979	0.667514636597031	-0.592628259396984
IDP	0.93168163895252	1	0.919643889980103	0.913895122276516	0.966813777166564	0.981171309669992	-0.77257296661495	-0.89673127788669	0.788189567066554	-0.82657546326038	0.62932959294022	-0.891904887093905	0.98291546269803	-0.871453115977286	-0.891689091022882	0.691520518858134	0.605616955833411	-0.811805859046151	-0.830635532232126	-0.897330618774396	0.73067827458852	0.947501962335981	-0.936158279146615	-0.758114691265129	-0.729661310010196	-0.944019452648883	0.602634028361255	-0.74572630667123
Adenosine 5'-Diphosphate	0.999348187298747	0.919643889980103	1	0.999849008451991	0.988168470705258	0.976397643666701	-0.62037760753427	-0.672940144920187	0.761683802583954	-0.733866809463277	0.434524606877959	-0.695598827134498	0.932449503458737	-0.677384948764149	-0.646659685791362	0.559774820100275	0.255657179986344	-0.685364292240522	-0.753039869760476	-0.847650462486586	0.684188343013751	0.822064927400158	-0.745963478934222	-0.584250980904897	-0.508635575894392	-0.926742648114183	0.658913074947324	-0.571597900484963
APS	0.998758477890216	0.913895122276516	0.999849008451991	1	0.986040613952954	0.973434309540263	-0.608318400801025	-0.663132057100897	0.756664571785131	-0.723498003750563	0.424393005102227	-0.684498214148471	0.929391641564956	-0.670818685535027	-0.635819684176388	0.552753269384967	0.244138205077832	-0.673240216628241	-0.743309304967293	-0.83986801016559	0.678453244045786	0.813513244959232	-0.735796547545557	-0.57043742160515	-0.493806370175684	-0.92188475809572	0.65482978418144	-0.561214413308483
Adenine	0.992019098100054	0.966813777166564	0.988168470705258	0.986040613952954	1	0.99768826027921	-0.69562026816568	-0.767769449941013	0.767387369988339	-0.780439801198639	0.497174944131061	-0.774818685662739	0.971266901233617	-0.770510231854364	-0.749506305712973	0.607316081376932	0.393168404109531	-0.733882822165389	-0.789149738039294	-0.883670467462979	0.691388140014887	0.890047331562417	-0.830800145081581	-0.65603851318605	-0.599206422538916	-0.941759511891558	0.634153249941346	-0.657454250597752
S-Methyl-L-cysteine	0.98262087004566	0.981171309669992	0.976397643666701	0.973434309540263	0.99768826027921	1	-0.717839207886525	-0.809247510631953	0.780871788705406	-0.796212916501579	0.539369253422128	-0.803467874120429	0.982493577309286	-0.808482998341937	-0.79218661355549	0.641385463598597	0.451721142921233	-0.750812807251428	-0.804246286477827	-0.892721641862724	0.708255897785313	0.906505328769385	-0.85921564537686	-0.679015065468237	-0.631116207588451	-0.949037035285121	0.633614950489315	-0.689709469431035
L-Cysteinesulfinic acid	-0.635284615155706	-0.77257296661495	-0.62037760753427	-0.608318400801025	-0.69562026816568	-0.717839207886525	1	0.774005572069914	-0.594874483695396	0.956867877682188	-0.58977499039322	0.769847219840578	-0.673591800962586	0.697845287447344	0.790247603167248	-0.599021729433187	-0.528705886029156	0.871364812419496	0.905190929540368	0.926704981807244	-0.535609181063388	-0.87031849617993	0.816901433550963	0.938602168150755	0.950845965563479	0.732798090617395	-0.598507756269196	0.928831242021344
Trigonelline	-0.698730039747892	-0.89673127788669	-0.672940144920187	-0.663132057100897	-0.767769449941013	-0.809247510631953	0.774005572069914	1	-0.772102823517424	0.793977851001443	-0.828459912284796	0.875763229755296	-0.865508135657048	0.958119248742609	0.991532754678488	-0.838216744684066	-0.839977154876496	0.759667537680114	0.800153861925276	0.804298813211446	-0.74610591268831	-0.847696910856416	0.913280962730418	0.749551477603765	0.787777458995371	0.832934377828171	-0.55238677468983	0.841443335416469
5-Hydroxyhexanoic Acid	0.777027937353843	0.788189567066554	0.761683802583954	0.756664571785131	0.767387369988339	0.780871788705406	-0.594874483695396	-0.772102823517424	1	-0.787160407789326	0.876179848371429	-0.663430938359861	0.76051884900565	-0.670395163791996	-0.713353151598781	0.917531889060494	0.367147519529117	-0.73983621995478	-0.866256803255807	-0.795982059481005	0.989747166622205	0.613179012818563	-0.64934848327963	-0.608545400386079	-0.579322784917533	-0.933011083051375	0.914872573211034	-0.644523101427408
N-Acetyl-L-methionine	-0.747698978302229	-0.82657546326038	-0.733866809463277	-0.723498003750563	-0.780439801198639	-0.796212916501579	0.956867877682188	0.793977851001443	-0.787160407789326	1	-0.711346488776245	0.771016765831751	-0.737272361781977	0.694676031375001	0.784166323257578	-0.737348233032708	-0.43756786091979	0.91353480319333	0.988678215207018	0.978444973530614	-0.73607852182695	-0.843699903037335	0.798346104518663	0.914928053366493	0.903291659916064	0.867363510343916	-0.797224714360707	0.902003272265248
2-Hydroxyisocaproic Acid	0.463213208645392	0.62932959294022	0.434524606877959	0.424393005102227	0.497174944131061	0.539369253422128	-0.58977499039322	-0.828459912284796	0.876179848371429	-0.711346488776245	1	-0.646415200003853	0.573818319469504	-0.701181761629443	-0.784806025084719	0.961783132319899	0.6201644478582	-0.677238140140617	-0.777310213503729	-0.647394349210946	0.902889749822338	0.502711788805459	-0.618770576783367	-0.613357878990552	-0.654030992836767	-0.735000688477674	0.754989930148406	-0.700446286411767
Methyl beta-D-galactopyranoside	-0.713060088017258	-0.891904887093905	-0.695598827134498	-0.684498214148471	-0.774818685662739	-0.803467874120429	0.769847219840578	0.875763229755296	-0.663430938359861	0.771016765831751	-0.646415200003853	1	-0.81462282471755	0.758438032106061	0.917191089566752	-0.582476216766119	-0.7631755975698	0.903842202935398	0.76712228787588	0.772868009875048	-0.655475011540914	-0.923798180935614	0.981604483370055	0.877231767125523	0.859017848926149	0.798055899745912	-0.431730757921178	0.655387865051357
Sorbitol	0.942812885185889	0.98291546269803	0.932449503458737	0.929391641564956	0.971266901233617	0.982493577309286	-0.673591800962586	-0.865508135657048	0.76051884900565	-0.737272361781977	0.573818319469504	-0.81462282471755	1	-0.885505739108948	-0.847814483805486	0.672507944978378	0.571070822515749	-0.692477786785483	-0.746352628630009	-0.838112110862673	0.693733743979482	0.895031682820019	-0.878035924028535	-0.627765597578146	-0.601383633486674	-0.919420158471182	0.557034967708429	-0.690432997299815
Sedoheptulose 7-phosphate	-0.700629617378923	-0.871453115977286	-0.677384948764149	-0.670818685535027	-0.770510231854364	-0.808482998341937	0.697845287447344	0.958119248742609	-0.670395163791996	0.694676031375001	-0.701181761629443	0.758438032106061	-0.885505739108948	1	0.93757126957537	-0.773642995174126	-0.805757779368453	0.586168881694038	0.685786069150078	0.747874700595336	-0.616929222610102	-0.808043583461495	0.843725205110655	0.595043645094645	0.646757525120979	0.768832327587366	-0.446681716035695	0.826665323761276
3-Methoxytyramine	-0.672191550561774	-0.891689091022882	-0.646659685791362	-0.635819684176388	-0.749506305712973	-0.79218661355549	0.790247603167248	0.991532754678488	-0.713353151598781	0.784166323257578	-0.784806025084719	0.917191089566752	-0.847814483805486	0.93757126957537	1	-0.770985847463001	-0.876665423293063	0.787286532090729	0.779404990175693	0.788039069611838	-0.691455692291516	-0.87749958612567	0.946965156945284	0.790552009672852	0.826775004795657	0.799212548589405	-0.47975056261274	0.821611650560022
3-Oxo-7alpha,12alpha-hydroxy-5beta-cholanoic acid	0.585039504539021	0.691520518858134	0.559774820100275	0.552753269384967	0.607316081376932	0.641385463598597	-0.599021729433187	-0.838216744684066	0.917531889060494	-0.737348233032708	0.961783132319899	-0.582476216766119	0.672507944978378	-0.773642995174126	-0.770985847463001	1	0.53871759355227	-0.613198145068607	-0.800492418510731	-0.716803898774493	0.911141639388798	0.527415552643133	-0.597907814665008	-0.54381458514917	-0.581242203680186	-0.803820236601898	0.821740963746095	-0.759186629949694
Adenylocuccinic Acid	0.285862020229643	0.605616955833411	0.255657179986344	0.244138205077832	0.393168404109531	0.451721142921233	-0.528705886029156	-0.839977154876496	0.367147519529117	-0.43756786091979	0.6201644478582	-0.7631755975698	0.571070822515749	-0.805757779368453	-0.876665423293063	0.53871759355227	1	-0.508687682331832	-0.41638750565032	-0.41337349211359	0.381369135635195	0.640151992567867	-0.779428596915467	-0.563440845104992	-0.646515256073907	-0.426724533628334	0.0595255057825335	-0.592473364667876
Val-Ser	-0.698545565105704	-0.811805859046151	-0.685364292240522	-0.673240216628241	-0.733882822165389	-0.750812807251428	0.871364812419496	0.759667537680114	-0.73983621995478	0.91353480319333	-0.677238140140617	0.903842202935398	-0.692477786785483	0.586168881694038	0.787286532090729	-0.613198145068607	-0.508687682331832	1	0.915191249398601	0.873466131713034	-0.729326816672066	-0.857978423254848	0.867030009452689	0.969920348758337	0.93030125690232	0.826431165172823	-0.667417518620255	0.711619956472657
Gluconolactone	-0.767436144950208	-0.830635532232126	-0.753039869760476	-0.743309304967293	-0.789149738039294	-0.804246286477827	0.905190929540368	0.800153861925276	-0.866256803255807	0.988678215207018	-0.777310213503729	0.76712228787588	-0.746352628630009	0.685786069150078	0.779404990175693	-0.800492418510731	-0.41638750565032	0.915191249398601	1	0.966586222195598	-0.826469916165723	-0.806277012935741	0.778953695351793	0.883554650124636	0.864595894233422	0.907159045088866	-0.864959887317158	0.863446480261167
N-Acetyl-D-glucosamine 6-phosphate	-0.858017744794863	-0.897330618774396	-0.847650462486586	-0.83986801016559	-0.883670467462979	-0.892721641862724	0.926704981807244	0.804298813211446	-0.795982059481005	0.978444973530614	-0.647394349210946	0.772868009875048	-0.838112110862673	0.747874700595336	0.788039069611838	-0.716803898774493	-0.41337349211359	0.873466131713034	0.966586222195598	1	-0.725895000306813	-0.889744860585482	0.822541579160106	0.859481690117801	0.835626041909258	0.918018492320603	-0.781091319020708	0.883430414936212
Ala-trp	0.701182581220154	0.73067827458852	0.684188343013751	0.678453244045786	0.691388140014887	0.708255897785313	-0.535609181063388	-0.74610591268831	0.989747166622205	-0.73607852182695	0.902889749822338	-0.655475011540914	0.693733743979482	-0.616929222610102	-0.691455692291516	0.911141639388798	0.381369135635195	-0.729326816672066	-0.826469916165723	-0.725895000306813	1	0.551534544931651	-0.617285887678285	-0.588068899981345	-0.560469646997967	-0.88758294577502	0.889971914031529	-0.578790447317919
Nonadecanoic acid	0.833119624043757	0.947501962335981	0.822064927400158	0.813513244959232	0.890047331562417	0.906505328769385	-0.87031849617993	-0.847696910856416	0.613179012818563	-0.843699903037335	0.502711788805459	-0.923798180935614	0.895031682820019	-0.808043583461495	-0.87749958612567	0.527415552643133	0.640151992567867	-0.857978423254848	-0.806277012935741	-0.889744860585482	0.551534544931651	1	-0.969189785007591	-0.866648307193604	-0.84503558905381	-0.831347393582813	0.455596058296312	-0.772234541436283
Phe-Pro	-0.763191239739431	-0.936158279146615	-0.745963478934222	-0.735796547545557	-0.830800145081581	-0.85921564537686	0.816901433550963	0.913280962730418	-0.64934848327963	0.798346104518663	-0.618770576783367	0.981604483370055	-0.878035924028535	0.843725205110655	0.946965156945284	-0.597907814665008	-0.779428596915467	0.867030009452689	0.778953695351793	0.822541579160106	-0.617285887678285	-0.969189785007591	1	0.86214150723833	0.855618168664617	0.817524575616614	-0.425106695102155	0.738853390291725
Tetrahydroaldosterone	-0.599188784054739	-0.758114691265129	-0.584250980904897	-0.57043742160515	-0.65603851318605	-0.679015065468237	0.938602168150755	0.749551477603765	-0.608545400386079	0.914928053366493	-0.613357878990552	0.877231767125523	-0.627765597578146	0.595043645094645	0.790552009672852	-0.54381458514917	-0.563440845104992	0.969920348758337	0.883554650124636	0.859481690117801	-0.588068899981345	-0.866648307193604	0.86214150723833	1	0.986398244625827	0.725957304943939	-0.559881822822027	0.782579568096264
5-Hydroxyindoleacetate	-0.527872591233096	-0.729661310010196	-0.508635575894392	-0.493806370175684	-0.599206422538916	-0.631116207588451	0.950845965563479	0.787777458995371	-0.579322784917533	0.903291659916064	-0.654030992836767	0.859017848926149	-0.601383633486674	0.646757525120979	0.826775004795657	-0.581242203680186	-0.646515256073907	0.93030125690232	0.864595894233422	0.835626041909258	-0.560469646997967	-0.84503558905381	0.855618168664617	0.986398244625827	1	0.680898521745838	-0.522166060253424	0.837108805606133
Asp-Phe methyl ester	-0.937435401433979	-0.944019452648883	-0.926742648114183	-0.92188475809572	-0.941759511891558	-0.949037035285121	0.732798090617395	0.832934377828171	-0.933011083051375	0.867363510343916	-0.735000688477674	0.798055899745912	-0.919420158471182	0.768832327587366	0.799212548589405	-0.803820236601898	-0.426724533628334	0.826431165172823	0.907159045088866	0.918018492320603	-0.88758294577502	-0.831347393582813	0.817524575616614	0.725957304943939	0.680898521745838	1	-0.821960588418145	0.72060447993877
CDP	0.667514636597031	0.602634028361255	0.658913074947324	0.65482978418144	0.634153249941346	0.633614950489315	-0.598507756269196	-0.55238677468983	0.914872573211034	-0.797224714360707	0.754989930148406	-0.431730757921178	0.557034967708429	-0.446681716035695	-0.47975056261274	0.821740963746095	0.0595255057825335	-0.667417518620255	-0.864959887317158	-0.781091319020708	0.889971914031529	0.455596058296312	-0.425106695102155	-0.559881822822027	-0.522166060253424	-0.821960588418145	1	-0.631752159560893
N-Acetylglucosamine 1-phosphate	-0.592628259396984	-0.74572630667123	-0.571597900484963	-0.561214413308483	-0.657454250597752	-0.689709469431035	0.928831242021344	0.841443335416469	-0.644523101427408	0.902003272265248	-0.700446286411767	0.655387865051357	-0.690432997299815	0.826665323761276	0.821611650560022	-0.759186629949694	-0.592473364667876	0.711619956472657	0.863446480261167	0.883430414936212	-0.578790447317919	-0.772234541436283	0.738853390291725	0.782579568096264	0.837108805606133	0.72060447993877	-0.631752159560893	1
