# Supplementary material for: Association analysis of transcriptome and quasi-targeted metabolomics reveals the regulation mechanism underlying broiler muscle tissue development at different levels of dietary guanidinoacetic acid
Source: Frontiers journal article supplement (doi:10.3389/fvets.2024.1384028), 2024-04-25
Supplement: Data_Sheet_1.ZIP [file High_GAA.vs.No_GAA_all_Diff.xls]

Compound_ID	Name	Chinese name	RT [min]	Formula	Molecular Weight	Class(English)	Class(Chinese)	CAS	all_High_GAA_1	all_High_GAA_2	all_High_GAA_3	all_No_GAA_1	all_No_GAA_2	all_No_GAA_3	FC	log2FC	Pvalue	ROC	VIP	Up.Down
Com_161_neg	dGDP	¶þÁ×ËáÍÑÑõÄñÜÕ	1.08	C10H15N5O10P2	427.201	Nucleotide And Its Derivates	ºËÜÕËá¼°ÆäÑÜÉúÎï	"3493-09-2"	129300	138500	246500	12590000	3574000	5237000	0.0240315873090043	-5.37892424679	0.002963412580832	1	1.97681070741648	down
Com_293_neg	IDP	¶þÁ×Ëá¼¡¸Ê	1.02	C10H13N4O15P3	522.149	Nucleotide And Its Derivates	ºËÜÕËá¼°ÆäÑÜÉúÎï	"86-04-4"	504700	514800	407800	1710000	1280000	1104000	0.348632144601856	-1.52022249984	0.00475008879284027	1	1.66068300205885	down
Com_226_neg	Adenosine 5'-Diphosphate	¶þÁ×ËáÏÙÜÕ	1.04	C10H15N5O10P2	427.201	Nucleotide And Its Derivates	ºËÜÕËá¼°ÆäÑÜÉúÎï	"58-64-0"	284500	382200	399000	17790000	4577000	7111000	0.0361523848293643	-4.78976537059	0.0113328599761357	1	1.94020789276518	down
Com_133_neg	APS	5'-ÏÙÜÕËáÁòËá(APS)	1.05	C10H14N5O10PS	427.284	Nucleotide And Its Derivates	ºËÜÕËá¼°ÆäÑÜÉúÎï	"485-84-7"	399300	418100	628100	16340000	4135000	6475000	0.0536363636363636	-4.22064475905	0.0127882037602369	1	1.83940905228837	down
Com_378_pos	Adenine	ÏÙàÑßÊ	1.032	C5H5N5	135.127	Nucleotide And Its Derivates	ºËÜÕËá¼°ÆäÑÜÉúÎï	"73-24-5"	698500	572900	478400	4274000	2001000	2097000	0.209006211180124	-2.25838227839	0.0137748469561436	1	2.09374190562798	down
Com_663_pos	S-Methyl-L-cysteine	S-¼×»ù-L-°ëë×°±Ëá	1.04	C4H9NO2S	135.185	Amino Acid And Its Derivatives	°±»ùËá¼°ÆäÑÜÉúÎï	"1187-84-4"	628600	527200	486000	2853000	1587000	1558000	0.273724574858286	-1.86920312992	0.01462051619789	1	2.11355356518714	down
Com_197_neg	L-Cysteinesulfinic acid	L-°ëë×ÑÇ»ÇËá	0.88	C3H7NO4S	153.16	Organic Acid And Its Derivatives	ÓÐ»úËá¼°ÆäÑÜÉúÎï	"1115-65-7"	18590	27160	49320	6573	9221	4047	4.79159316566705	2.26050542007	0.0151400692307426	1	1.88850645536705	up
Com_537_pos	Trigonelline	ºùÂ«°Í¼î	0.94	C7H7NO2	137.14	Alkaloids and derivatives	ÉúÎï¼î¼°ÆäÑÜÉúÎï	"535-83-1"	775300	822600	797500	515500	429400	540800	1.6123039644612	0.689123757936	0.0162229824788481	1	2.47359693109088	up
Com_222_neg	5-Hydroxyhexanoic Acid	5-ôÇ»ù¼ºËá	6.36	C6H12O3	132.16	Fatty Acyls	Ö¬·¾õ£Àà	"185956-02-9"	60710	66950	75340	98100	84620	105200	0.705056960266741	-0.504188279965	0.0175353489604006	1	1.60810640234035	down
Com_173_neg	N-Acetyl-L-methionine	N-ÒÒõ£-L-µ°°±Ëá	5.315	C7H13NO3S	191.25	Amino Acid And Its Derivatives	°±»ùËá¼°ÆäÑÜÉúÎï	"65-82-7"	22220	23170	27280	16720	19390	15430	1.40997283663174	0.495667369125	0.0200047925722542	1	1.52148543734998	up
Com_102_neg	2-Hydroxyisocaproic Acid	2-ôÇ»ù-4-¼×»ùÎìËá	6.39	C6H12O3	132.158	Fatty Acyls	Ö¬·¾õ£Àà	"498-36-2"	9470	10280	12330	14400	17680	20280	0.612681436210848	-0.70679095549	0.0203421926507632	1	1.63062250879621	down
Com_288_neg	Methyl beta-D-galactopyranoside	¼×»ù-¦Â-D-ßÁà«°ëÈéÌÇÜÕ	1.03	C7H14O6	194.182	Carbohydrates And Its Derivatives	ÌÇÀà¼°ÆäÑÜÉúÎï	"1824-94-8"	13690	10600	14280	7142	6600	9290	1.67462660646058	0.743839451953	0.0207818190462064	1	1.47923036551813	up
Com_275_neg	Sorbitol	É½Àæ´¼	0.91	C6H14O6	182.172	Sugar Alcohols	ÌÇ´¼	"50-70-4"	14790	12670	15100	34590	26390	22430	0.510250569476082	-0.970722207478	0.0212847399224862	1	2.22934648200302	down
Com_159_neg	Sedoheptulose 7-phosphate	7-Á×Ëá¾°Ìì¸ýÌÇ	0.87	C7H13BaO10P	425.473	Carbohydrates And Its Derivatives	ÌÇÀà¼°ÆäÑÜÉúÎï	"2646-35-7"	279800	356400	301600	178400	152300	225900	1.68487243981315	0.752639370389	0.0240076261004981	1	1.5787363957838	up
Com_673_pos	3-Methoxytyramine	3-¼×ÑõÀÒ°·	18.4	C9H13NO2	167.205	Phenols And Its Derivatives	·ÓÀà¼°ÆäÑÜÉúÎï	"554-52-9"	243600	246400	252400	194600	173800	202900	1.2994923857868	0.377948180544	0.0246610159182495	1	1.88019000376557	up
Com_60_neg	3-Oxo-7alpha,12alpha-hydroxy-5beta-cholanoic acid	3-ÍÑÇâµ¨Ëá	10.321	C24H38O5	406.562	Bile Acids	µ¨Ö­Ëá	"2304-89-4"	7364	6231	8801	10590	11160	13220	0.640434658278524	-0.642876710872	0.0252251943724938	1	1.75058966834166	down
Com_589_pos	Adenylocuccinic Acid	ÏÙÜÕËá»ùçúçêËá	3.68	C14H18N5O11P	463.293	Organic Acid And Its Derivatives	ÓÐ»úËá¼°ÆäÑÜÉúÎï	"19046-78-7"	30900	25170	3456	220400	764800	196200	0.0503859827323514	-4.31083375476	0.0260651299533114	1	2.03351634678538	down
Com_651_pos	Val-Ser	çÓ°±õ£-Ë¿°±Ëá	1.01	C8H16N2O4	204.224	Amino Acid And Its Derivatives	°±»ùËá¼°ÆäÑÜÉúÎï	"13588-94-8"	198800	125900	243300	71990	96500	65000	2.43265236198552	1.28253016677	0.0269912617806388	1	2.06400465288185	up
Com_92_neg	Gluconolactone	ÆÏÌÇËáÄÚõ¥	1.02	C6H10O6	178.14	Amino Acid And Its Derivatives	°±»ùËá¼°ÆäÑÜÉúÎï	"90-80-2"	45090	45130	51940	30990	37370	27010	1.49061549753591	0.57590816417	0.0318884375843113	1	1.7093540011425	up
Com_296_neg	N-Acetyl-D-glucosamine 6-phosphate	6-Á×Ëá-NÒÒõ£-D-°±»ùÆÏÌÑÌÇ	1.81	C8H16NO9P	301.188	Sugar Acids And Its Derivatives	ÌÇËá¼°ÆäÑÜÉúÎï		194000	217600	256900	99940	161100	116900	1.76879928030904	0.822770343262	0.0330699978773999	1	1.21834837477453	up
Com_51_neg	Ala-trp	L-±û°±õ£-L-É«°±Ëá	5.46	C14H17N3O3	275.303	Amino Acid And Its Derivatives	°±»ùËá¼°ÆäÑÜÉúÎï	"16305-75-2"	169100	217400	248200	321200	284500	367400	0.652245401294831	-0.616513227638	0.0396048279032111	1	1.00042362031066	down
Com_30_neg	Nonadecanoic acid	ÕýÌ¼Ê®¾ÅËá	18.28	C19H38O2	298.5	Fatty Acyls	Ö¬·¾õ£Àà	"646-30-0"	650700	657000	513500	904300	829800	739100	0.736373928513666	-0.441489546241	0.0408823814328337	1	1.66340883472245	down
Com_646_pos	Phe-Pro	L-±½±û°±õ£-L-¸¬°±Ëá	5.58	C14H18N2O3	262.304	Amino Acid And Its Derivatives	°±»ùËá¼°ÆäÑÜÉúÎï	"7669-65-0"	249000	216500	289100	95380	91330	168000	2.12737165571876	1.08907209678	0.0409721109868086	1	1.76105502993576	up
Com_97_neg	Tetrahydroaldosterone	ËÄÇâÈ©çÞÍª	0.97	C21H32O5	364.476	Hormones	¼¤ËØ	"13489-75-3"	11240	7988	18220	4872	4691	3767	2.8093023255814	1.49021188974	0.0431495817430192	1	2.244422437299	up
Com_392_pos	5-Hydroxyindoleacetate	5-ôÇ»ùßÅßá-3-ÒÒËá	5.58	C10H9NO3	191.058	Indole And Its Derivatives	ßÅßá¼°ÆäÑÜÉúÎï	"54-16-0"	49300	44750	71710	36240	28970	29250	1.75481685369469	0.811320467536	0.0435200116723873	1	2.14581447154993	up
Com_469_pos	Asp-Phe methyl ester	°¢Ë¹°ÍÌð	5.36	C14H18N2O5	294.303	Organic Acid And Its Derivatives	ÓÐ»úËá¼°ÆäÑÜÉúÎï	"22839-47-0"	132100	128900	128800	92850	112100	101600	1.27157070624694	0.346611685949	0.0437868242800467	1	1.81494453889111	up
Com_242_neg	CDP	5-°ûÜÕ¶þÁ×Ëá	0.99	C9H15N3O11P2	403.176	Nucleotide And Its Derivates	ºËÜÕËá¼°ÆäÑÜÉúÎï	"63-38-7"	9867	7237	38020	207300	41420	335600	0.0943387185104053	-3.40600618623	0.0484161692916722	1	1.66595555106162	down
Com_52_neg	N-Acetylglucosamine 1-phosphate	N-ÒÒõ£ÆÏÌÑÌÇ°· 1-Á×Ëá	0.91	C8H16NO9P	301.1	Carbohydrates And Its Derivatives	ÌÇÀà¼°ÆäÑÜÉúÎï		306900	454100	477900	265300	245300	215300	1.70670891307343	0.77121702118	0.0486849253875088	1	1.8416785869495	up
