# Supplementary material for: Association analysis of transcriptome and quasi-targeted metabolomics reveals the regulation mechanism underlying broiler muscle tissue development at different levels of dietary guanidinoacetic acid
Source: Frontiers journal article supplement (doi:10.3389/fvets.2024.1384028), 2024-04-25
Supplement: Data_Sheet_1.ZIP [file High_GAA.vs.No_GAA_all_kegg_enrichment.xls]

MapID	MapTitle	Pvalue	x	y	n	N	EnrichDirect	MetaIDs	kegg_cpd_id
map00230	Purine metabolism	0.0101095502086792	5	29	15	292	Over	APS, dGDP, Adenosine 5'-Diphosphate, IDP, Adenine	cpd:C00224,cpd:C00361,cpd:C00008,cpd:C00104,cpd:C00147
map00030	Pentose phosphate pathway	0.12066826825563	2	12	15	292	Over	Sedoheptulose 7-phosphate, Gluconolactone	cpd:C05382,cpd:C00198
map04068	FoxO signaling pathway	0.146806169009832	1	3	15	292	Over	Adenosine 5'-Diphosphate	cpd:C00008
map04142	Lysosome	0.191089585843232	1	4	15	292	Over	Adenosine 5'-Diphosphate	cpd:C00008
map00051	Fructose and mannose metabolism	0.273295928745342	1	6	15	292	Over	Sorbitol	cpd:C00794
map00920	Sulfur metabolism	0.273295928745342	1	6	15	292	Over	APS	cpd:C00224
map00190	Oxidative phosphorylation	0.311409778636321	1	7	15	292	Over	Adenosine 5'-Diphosphate	cpd:C00008
map01200	Carbon metabolism	0.334236036459606	2	23	15	292	Over	Sedoheptulose 7-phosphate, Gluconolactone	cpd:C05382,cpd:C00198
map00380	Tryptophan metabolism	0.414856946583972	1	10	15	292	Over	5-Hydroxyindoleacetate	cpd:C05635
map00430	Taurine and hypotaurine metabolism	0.414856946583972	1	10	15	292	Over	L-Cysteinesulfinic acid	cpd:C00606
map00760	Nicotinate and nicotinamide metabolism	0.475555514251115	1	12	15	292	Over	Trigonelline	cpd:C01004
map00052	Galactose metabolism	0.555677769920152	1	15	15	292	Over	Sorbitol	cpd:C00794
map00350	Tyrosine metabolism	0.555677769920152	1	15	15	292	Over	3-Methoxytyramine	cpd:C05587
map00520	Amino sugar and nucleotide sugar metabolism	0.555677769920152	1	15	15	292	Over	N-Acetyl-D-glucosamine 6-phosphate	cpd:C00357
map04080	Neuroactive ligand-receptor interaction	0.555677769920152	1	15	15	292	Over	Adenosine 5'-Diphosphate	cpd:C00008
map02010	ABC transporters	0.658017358665684	2	30	15	292	Over	Sorbitol, Methyl beta-D-galactopyranoside	cpd:C00794,cpd:C03619
map01100	Metabolic pathways	0.767724752948989	12	218	15	292	Over	APS, Sedoheptulose 7-phosphate, dGDP, L-Cysteinesulfinic acid, Adenosine 5'-Diphosphate, CDP, Sorbitol, N-Acetyl-D-glucosamine 6-phosphate, Adenine, 5-Hydroxyindoleacetate, 3-Methoxytyramine, Gluconolactone	cpd:C00224,cpd:C05382,cpd:C00361,cpd:C00606,cpd:C00008,cpd:C00112,cpd:C00794,cpd:C00357,cpd:C00147,cpd:C05635,cpd:C05587,cpd:C00198
map00270	Cysteine and methionine metabolism	1	1	18	15	292	Over	L-Cysteinesulfinic acid	cpd:C00606
