# Supplementary material for: Association analysis of transcriptome and quasi-targeted metabolomics reveals the regulation mechanism underlying broiler muscle tissue development at different levels of dietary guanidinoacetic acid
Source: Frontiers journal article supplement (doi:10.3389/fvets.2024.1384028), 2024-04-25
Supplement: Data_Sheet_1.ZIP [file High_GAA.vs.No_GAA_all_Pvalue.xls]

Pvalue	dGDP	IDP	Adenosine 5'-Diphosphate	APS	Adenine	S-Methyl-L-cysteine	L-Cysteinesulfinic acid	Trigonelline	5-Hydroxyhexanoic Acid	N-Acetyl-L-methionine	2-Hydroxyisocaproic Acid	Methyl beta-D-galactopyranoside	Sorbitol	Sedoheptulose 7-phosphate	3-Methoxytyramine	3-Oxo-7alpha,12alpha-hydroxy-5beta-cholanoic acid	Adenylocuccinic Acid	Val-Ser	Gluconolactone	N-Acetyl-D-glucosamine 6-phosphate	Ala-trp	Nonadecanoic acid	Phe-Pro	Tetrahydroaldosterone	5-Hydroxyindoleacetate	Asp-Phe methyl ester	CDP	N-Acetylglucosamine 1-phosphate
dGDP	0	0.00684166317787879	6.37151231765536e-07	2.31110889671762e-06	9.52880217490773e-05	0.000450426691513765	0.17526923785522	0.122473212007761	0.0690321112649617	0.0874534959360119	0.354875200093445	0.111689240663594	0.00481203775029925	0.121018759068866	0.143574686899336	0.222561836222232	0.582886876531759	0.122614862305699	0.0748397018819808	0.0288073338317044	0.12059679461676	0.0394498590276029	0.0774776565235317	0.20877935930471	0.281736822717344	0.00574904427951708	0.147442225897382	0.215125578982836
IDP	0.00684166317787879	0	0.00942622272980218	0.0108018820187085	0.00163371366409059	0.000528441799625451	0.0717029727348707	0.0154459924746334	0.0625441936784017	0.0425061406665907	0.18063040832209	0.0168953085899096	0.000435328792773965	0.0237243783606301	0.0169615681670523	0.128061994909852	0.202636206181497	0.0497929128247874	0.0405974318692408	0.0152703836936031	0.0990337708273532	0.00406172248808867	0.00598354604632206	0.080686580267343	0.0997459287303761	0.00461301599607383	0.205477586205646	0.0887626197301684
Adenosine 5'-Diphosphate	6.37151231765536e-07	0.00942622272980218	0	3.41959501687923e-08	0.00020914950935882	0.000829032739954411	0.188815449836105	0.142959729584111	0.0784243771876595	0.0968156215341298	0.389234740198165	0.124887193454761	0.00669048556641587	0.139331743637911	0.16521690730466	0.248039887812077	0.624869182551532	0.132919663061557	0.083952995424295	0.0330475269211733	0.133856449991667	0.0446745437058669	0.0886047642549877	0.223340333646289	0.302841228988219	0.00785338650497786	0.154669359699555	0.235980571173346
APS	2.31110889671762e-06	0.0108018820187085	3.41959501687923e-08	0	0.00029093659411199	0.00104922968354342	0.200076899242879	0.151106127504646	0.0816139913562553	0.104110278404091	0.401629081937012	0.133609324228085	0.0073023000137647	0.144705407474066	0.174790827206566	0.255313156247699	0.641068433641678	0.142713543432605	0.0903784799344177	0.0364103086605845	0.138465742454268	0.0489232108811027	0.095484038304074	0.237153708647092	0.319496485543084	0.00891465727442107	0.158151499429428	0.246558879784829
Adenine	9.52880217490773e-05	0.00163371366409059	0.00020914950935882	0.00029093659411199	0	8.0100336740407e-06	0.124870594000623	0.0746343263780008	0.0748697774400214	0.0670178871258142	0.315684162284751	0.0703508443342433	0.0012265255537131	0.0729552276732585	0.0862617610165016	0.201024930216987	0.440635653825748	0.0968045384763566	0.0619997765894986	0.0195117220128486	0.128165625882072	0.0174697426430828	0.0405209096428481	0.157117300096135	0.208762400901425	0.00498915714111079	0.176282599024669	0.155909639226264
S-Methyl-L-cysteine	0.000450426691513765	0.000528441799625451	0.000829032739954411	0.00104922968354342	8.0100336740407e-06	0	0.108189993722743	0.0511093594093645	0.0667648008639211	0.0580622083336778	0.269402553439587	0.0541418002086554	0.000457029614132398	0.0515058396320256	0.0602922489895682	0.169846877495795	0.368505584904519	0.0854048387473244	0.0537286807228828	0.016645654856628	0.115256087395259	0.01270325000945	0.0283351622982318	0.138011240226626	0.179014900894274	0.00382965454705688	0.17676560779404	0.129482900797651
L-Cysteinesulfinic acid	0.17526923785522	0.0717029727348707	0.188815449836105	0.200076899242879	0.124870594000623	0.108189993722743	0	0.0708390610712094	0.212944072152062	0.00275044889512468	0.217909570445245	0.0733598221623203	0.142425326442577	0.123153225026341	0.0613799616109217	0.208940000588003	0.280835726362126	0.0237562532627451	0.0130570317795542	0.00786136326663944	0.273413258101762	0.0241354927631034	0.0472184300484802	0.00553881512201183	0.00356479765132392	0.0975566018581413	0.209434556432331	0.00741725356943752
Trigonelline	0.122473212007761	0.0154459924746334	0.142959729584111	0.151106127504646	0.0746343263780008	0.0511093594093645	0.0708390610712094	0	0.071987522724379	0.0592953707930272	0.0416151330842184	0.022193379318505	0.0259157437999159	0.00259426662596946	0.000107237838628767	0.0371434895115385	0.0363620890641269	0.0796987741130672	0.0559169429703624	0.0537008563404451	0.0885100246789798	0.0330279176279659	0.0109542152572168	0.0862320690962965	0.0627785277870227	0.0395349053835034	0.255695043551199	0.0357172494370546
5-Hydroxyhexanoic Acid	0.0690321112649617	0.0625441936784017	0.0784243771876595	0.0816139913562553	0.0748697774400214	0.0667648008639211	0.212944072152062	0.071987522724379	0	0.0631301476112182	0.0220479749334795	0.150855041402558	0.0791595642327499	0.145054994817394	0.111473251495349	0.00992105161194643	0.474023968074703	0.0927231709110222	0.0256347155048631	0.0581890280629676	0.000157141996450671	0.195505609942671	0.162877290082931	0.199862449119441	0.228230498737428	0.00658096560630682	0.0105615726284139	0.167086027752363
N-Acetyl-L-methionine	0.0874534959360119	0.0425061406665907	0.0968156215341298	0.104110278404091	0.0670178871258142	0.0580622083336778	0.00275044889512468	0.0592953707930272	0.0631301476112182	0	0.11295584642351	0.0726468065241481	0.094471223559298	0.125602522419148	0.0648490470304375	0.0944192851141005	0.385537812336339	0.0108911285278739	0.000191548587248309	0.000691921309932197	0.0952901545060817	0.0347353966391539	0.0568963837422295	0.0105480112742139	0.0135765220402846	0.0252219579462758	0.0575078862097567	0.0139344891087577
2-Hydroxyisocaproic Acid	0.354875200093445	0.18063040832209	0.389234740198165	0.401629081937012	0.315684162284751	0.269402553439587	0.217909570445245	0.0416151330842184	0.0220479749334795	0.11295584642351	0	0.165430339484141	0.233742372150775	0.120597419567253	0.0644800208859489	0.00216288504162198	0.189012174000043	0.139450933684333	0.0688644357508049	0.164576255831228	0.0136877067492323	0.309454762913727	0.190300654146858	0.195338217549835	0.158836527885426	0.0960322126832888	0.0826909322914955	0.121158800069582
Methyl beta-D-galactopyranoside	0.111689240663594	0.0168953085899096	0.124887193454761	0.133609324228085	0.0703508443342433	0.0541418002086554	0.0733598221623203	0.022193379318505	0.150855041402558	0.0726468065241481	0.165430339484141	0	0.0483618304331774	0.0804804422600191	0.0100020500520943	0.225096515957693	0.0774874536305193	0.0134249299303026	0.0750333278103653	0.0715246619953248	0.157599079669064	0.00848883463527163	0.00050448007240378	0.0216828747075685	0.0284128720964889	0.0570543458942764	0.392639323532257	0.157673643464237
Sorbitol	0.00481203775029925	0.000435328792773965	0.00669048556641587	0.0073023000137647	0.0012265255537131	0.000457029614132398	0.142425326442577	0.0259157437999159	0.0791595642327499	0.094471223559298	0.233742372150775	0.0483618304331774	0	0.0189129547090551	0.0329783059097498	0.1433146364078	0.236513112588397	0.127313693168036	0.0883460294331357	0.0371901792767044	0.126334792093143	0.015949232713949	0.0214057315450763	0.182049564536945	0.206673436174698	0.00947805936911755	0.250868169003836	0.128914423161226
Sedoheptulose 7-phosphate	0.121018759068866	0.0237243783606301	0.139331743637911	0.144705407474066	0.0729552276732585	0.0515058396320256	0.123153225026341	0.00259426662596946	0.145054994817394	0.125602522419148	0.120597419567253	0.0804804422600191	0.0189129547090551	0	0.00572436638030662	0.0710572576537518	0.0529306770099601	0.221448720478642	0.132584358860247	0.0873373044441851	0.192008310960231	0.0517343642195233	0.0347244604836825	0.212780148740139	0.165131527621097	0.0739811131577253	0.374539411354189	0.0424634526075848
3-Methoxytyramine	0.143574686899336	0.0169615681670523	0.16521690730466	0.174790827206566	0.0862617610165016	0.0602922489895682	0.0613799616109217	0.000107237838628767	0.111473251495349	0.0648490470304375	0.0644800208859489	0.0100020500520943	0.0329783059097498	0.00572436638030662	0	0.0726656152647678	0.0218790798287736	0.0630582039372273	0.0676259228883989	0.062629723448098	0.128112738961496	0.0215903849704892	0.00414445645900923	0.0612086105169596	0.0424113759807883	0.0564259676132488	0.335583995309781	0.0448952318314287
3-Oxo-7alpha,12alpha-hydroxy-5beta-cholanoic acid	0.222561836222232	0.128061994909852	0.248039887812077	0.255313156247699	0.201024930216987	0.169846877495795	0.208940000588003	0.0371434895115385	0.00992105161194643	0.0944192851141005	0.00216288504162198	0.225096515957693	0.1433146364078	0.0710572576537518	0.0726656152647678	0	0.270096016135557	0.195487702163327	0.0557343850350929	0.108943879469205	0.0114929080873453	0.282231515607919	0.210012432858123	0.264690435932107	0.226320853886031	0.0539546131608715	0.0448322211279211	0.080004105185579
Adenylocuccinic Acid	0.582886876531759	0.202636206181497	0.624869182551532	0.641068433641678	0.440635653825748	0.368505584904519	0.280835726362126	0.0363620890641269	0.474023968074703	0.385537812336339	0.189012174000043	0.0774874536305193	0.236513112588397	0.0529306770099601	0.0218790798287736	0.270096016135557	0	0.302783292099906	0.411515073520579	0.415257906038144	0.455679921092496	0.170937417561324	0.0676120240853101	0.244275271357327	0.165342978121813	0.398765151387171	0.910817199267039	0.215276341941472
Val-Ser	0.122614862305699	0.0497929128247874	0.132919663061557	0.142713543432605	0.0968045384763566	0.0854048387473244	0.0237562532627451	0.0796987741130672	0.0927231709110222	0.0108911285278739	0.139450933684333	0.0134249299303026	0.127313693168036	0.221448720478642	0.0630582039372273	0.195487702163327	0.302783292099906	0	0.0104837917732281	0.0230032742521279	0.099980661973675	0.0288228956823663	0.0253460051553911	0.00134357031330682	0.00711757690664622	0.0425747310893426	0.147523002177137	0.112753292339213
Gluconolactone	0.0748397018819808	0.0405974318692408	0.083952995424295	0.0903784799344177	0.0619997765894986	0.0537286807228828	0.0130570317795542	0.0559169429703624	0.0256347155048631	0.000191548587248309	0.0688644357508049	0.0750333278103653	0.0883460294331357	0.132584358860247	0.0676259228883989	0.0557343850350929	0.411515073520579	0.0104837917732281	0	0.00165606790427999	0.0425563061835968	0.0526578177443269	0.067891879639132	0.0195498077647919	0.0262601399447327	0.0125290457079888	0.0261224636437646	0.0266971481908101
N-Acetyl-D-glucosamine 6-phosphate	0.0288073338317044	0.0152703836936031	0.0330475269211733	0.0364103086605845	0.0195117220128486	0.016645654856628	0.00786136326663944	0.0537008563404451	0.0581890280629676	0.000691921309932197	0.164576255831228	0.0715246619953248	0.0371901792767044	0.0873373044441851	0.062629723448098	0.108943879469205	0.415257906038144	0.0230032742521279	0.00165606790427999	0	0.102403085317927	0.0175641521214344	0.0444430215478388	0.028230798322589	0.0383076037544799	0.00980595387356743	0.0666363533004337	0.0195907011952704
Ala-trp	0.12059679461676	0.0990337708273532	0.133856449991667	0.138465742454268	0.128165625882072	0.115256087395259	0.273413258101762	0.0885100246789798	0.000157141996450671	0.0952901545060817	0.0136877067492323	0.157599079669064	0.126334792093143	0.192008310960231	0.128112738961496	0.0114929080873453	0.455679921092496	0.099980661973675	0.0425563061835968	0.102403085317927	0	0.256583926905276	0.191677052078542	0.219581122847908	0.247324636780062	0.0182460505714159	0.0174932596623334	0.228761260680336
Nonadecanoic acid	0.0394498590276029	0.00406172248808867	0.0446745437058669	0.0489232108811027	0.0174697426430828	0.01270325000945	0.0241354927631034	0.0330279176279659	0.195505609942671	0.0347353966391539	0.309454762913727	0.00848883463527163	0.015949232713949	0.0517343642195233	0.0215903849704892	0.282231515607919	0.170937417561324	0.0288228956823663	0.0526578177443269	0.0175641521214344	0.256583926905276	0	0.00140928042547076	0.0254883361229464	0.0341602977359188	0.0402670002671426	0.363889441096958	0.0719077499682845
Phe-Pro	0.0774776565235317	0.00598354604632206	0.0886047642549877	0.095484038304074	0.0405209096428481	0.0283351622982318	0.0472184300484802	0.0109542152572168	0.162877290082931	0.0568963837422295	0.190300654146858	0.00050448007240378	0.0214057315450763	0.0347244604836825	0.00414445645900923	0.210012432858123	0.0676120240853101	0.0253460051553911	0.067891879639132	0.0444430215478388	0.191677052078542	0.00140928042547076	0	0.0271974481919361	0.0297642698281915	0.0469079530604643	0.400751684808816	0.0933915479266472
Tetrahydroaldosterone	0.20877935930471	0.080686580267343	0.223340333646289	0.237153708647092	0.157117300096135	0.138011240226626	0.00553881512201183	0.0862320690962965	0.199862449119441	0.0105480112742139	0.195338217549835	0.0216828747075685	0.182049564536945	0.212780148740139	0.0612086105169596	0.264690435932107	0.244275271357327	0.00134357031330682	0.0195498077647919	0.028230798322589	0.219581122847908	0.0254883361229464	0.0271974481919361	0	0.000276253408814405	0.102358877260103	0.247929686952926	0.065768555663428
5-Hydroxyindoleacetate	0.281736822717344	0.0997459287303761	0.302841228988219	0.319496485543084	0.208762400901425	0.179014900894274	0.00356479765132392	0.0627785277870227	0.228230498737428	0.0135765220402846	0.158836527885426	0.0284128720964889	0.206673436174698	0.165131527621097	0.0424113759807883	0.226320853886031	0.165342978121813	0.00711757690664622	0.0262601399447327	0.0383076037544799	0.247324636780062	0.0341602977359188	0.0297642698281915	0.000276253408814405	0	0.136492255915017	0.287937128357309	0.0376392717069067
Asp-Phe methyl ester	0.00574904427951708	0.00461301599607383	0.00785338650497786	0.00891465727442107	0.00498915714111079	0.00382965454705688	0.0975566018581413	0.0395349053835034	0.00658096560630682	0.0252219579462758	0.0960322126832888	0.0570543458942764	0.00947805936911755	0.0739811131577253	0.0564259676132488	0.0539546131608715	0.398765151387171	0.0425747310893426	0.0125290457079888	0.00980595387356743	0.0182460505714159	0.0402670002671426	0.0469079530604643	0.102358877260103	0.136492255915017	0	0.0447252986250258	0.106187718430345
CDP	0.147442225897382	0.205477586205646	0.154669359699555	0.158151499429428	0.176282599024669	0.17676560779404	0.209434556432331	0.255695043551199	0.0105615726284139	0.0575078862097567	0.0826909322914955	0.392639323532257	0.250868169003836	0.374539411354189	0.335583995309781	0.0448322211279211	0.910817199267039	0.147523002177137	0.0261224636437646	0.0666363533004337	0.0174932596623334	0.363889441096958	0.400751684808816	0.247929686952926	0.287937128357309	0.0447252986250258	0	0.178441312752514
N-Acetylglucosamine 1-phosphate	0.215125578982836	0.0887626197301684	0.235980571173346	0.246558879784829	0.155909639226264	0.129482900797651	0.00741725356943752	0.0357172494370546	0.167086027752363	0.0139344891087577	0.121158800069582	0.157673643464237	0.128914423161226	0.0424634526075848	0.0448952318314287	0.080004105185579	0.215276341941472	0.112753292339213	0.0266971481908101	0.0195907011952704	0.228761260680336	0.0719077499682845	0.0933915479266472	0.065768555663428	0.0376392717069067	0.106187718430345	0.178441312752514	0
