# Supplementary material for: Association analysis of transcriptome and quasi-targeted metabolomics reveals the regulation mechanism underlying broiler muscle tissue development at different levels of dietary guanidinoacetic acid
Source: Frontiers journal article supplement (doi:10.3389/fvets.2024.1384028), 2024-04-25
Supplement: Data_Sheet_1.ZIP [file High_GAA.vs.No_GAA_all_zscore.xls]

Compound_ID	all_High_GAA_1	all_High_GAA_2	all_High_GAA_3	all_No_GAA_1	all_No_GAA_2	all_No_GAA_3
dGDP	-1.4598745266097	-1.45795703052704	-1.43544729390458	1.13722802090478	-0.741918140096652	-0.395309880808123
IDP	-2.75855249850797	-2.72615428900187	-3.06938284515562	1.10774076067067	-0.271588950975241	-0.836151809695427
Adenosine 5'-Diphosphate	-1.36065409686547	-1.34672170622839	-1.3443259624955	1.13569661242327	-0.748527312733518	-0.387169299689751
APS	-1.32518720837149	-1.32228489910149	-1.2898654870429	1.13570860973509	-0.748476743479693	-0.387231866255393
Adenine	-1.62751096683159	-1.72521607832719	-1.79872828403049	1.15389529234455	-0.614287179227919	-0.539608113116631
S-Methyl-L-cysteine	-1.85374717729002	-1.99087812698401	-2.04659602764863	1.15447850810752	-0.557629798722765	-0.596848709384754
L-Cysteinesulfinic acid	4.62900027099638	7.94141077413638	16.5065235803887	-0.0157181673038928	1.00776643156597	-0.992048264262077
Trigonelline	4.79567381817961	5.60560730401594	5.17581173330786	0.347032811408379	-1.12728585942689	0.780253048018511
5-Hydroxyhexanoic Acid	-3.37334455676252	-2.77641658528512	-1.97381631594291	0.203440195407363	-1.08607728143805	0.882637086030689
N-Acetyl-L-methionine	2.49544705661244	2.96581902164851	5.00079668090984	-0.22775905675431	1.09423372918918	-0.866474672434873
2-Hydroxyisocaproic Acid	-2.70938696760687	-2.43448883268893	-1.7387589850571	-1.03624152915569	0.0769262270552267	0.959315302100469
Methyl beta-D-galactopyranoside	4.22635547353931	2.0543677121628	4.6410715833167	-0.37629043632909	-0.757266930395778	1.13355736672487
Sorbitol	-2.09825525947594	-2.4400816798209	-2.04827120744437	1.09427451544391	-0.227884280229969	-0.86639023521394
Sedoheptulose 7-phosphate	2.52624590918948	4.57904403483214	3.11046260813217	-0.191165708828341	-0.890617811690917	1.08178352051926
3-Methoxytyramine	3.54662563314612	3.73340717119268	4.13365332414961	0.2779487173312	-1.10957127958615	0.831622562254951
3-Oxo-7alpha,12alpha-hydroxy-5beta-cholanoic acid	-3.1026281519667	-3.92153117173179	-2.06400181533613	-0.770959006545538	-0.358977787422766	1.12993679396831
Adenylocuccinic Acid	-1.12868998033246	-1.14651140107455	-1.21404618815898	-0.539307915650724	1.15388256462756	-0.614574648976834
Val-Ser	7.3128479019697	2.90591550506476	10.002950668256	-0.353038205732852	1.1286341268891	-0.775595921156248
Gluconolactone	2.54490578448057	2.55255963646397	3.85562793663785	-0.153077039668004	1.06771235168433	-0.914635312016325
N-Acetyl-D-glucosamine 6-phosphate	2.15424612881406	2.90167642343347	4.14633788862595	-0.824706986097004	1.1122776248743	-0.287570638777296
Ala-trp	-3.73770677034951	-2.57498948605659	-1.83354658013066	-0.0762306017997436	-0.959703155289398	1.03593375708914
Nonadecanoic acid	-2.09954327324294	-2.0233940353533	-3.75790445395067	0.965765731330519	0.0652707753339775	-1.0310365066645
Phe-Pro	3.03086775543383	2.27757400296806	3.96031635463006	-0.529777975452084	-0.623649966143972	1.15342794159606
Tetrahydroaldosterone	11.467834493978	5.98082157964504	23.2450024343361	0.723277840081205	0.417881364836964	-1.14115920491817
5-Hydroxyindoleacetate	4.32479250965183	3.2201252612097	9.76558218824263	1.15403333060694	-0.611006426794	-0.543026903812945
Asp-Phe methyl ester	3.10395263183	2.77194209962312	2.76156677049165	-0.968364052270083	1.02888680553696	-0.0605227532668797
CDP	-1.25369140420073	-1.27152318061211	-1.06281003488151	0.0849325928440587	-1.03975754826604	0.954824955421979
N-Acetylglucosamine 1-phosphate	2.58018903156271	8.42932392036194	9.37504002330638	0.927172649945531	0.132453235706505	-1.05962588565203
