# Supplementary material for: Association analysis of transcriptome and quasi-targeted metabolomics reveals the regulation mechanism underlying broiler muscle tissue development at different levels of dietary guanidinoacetic acid
Source: Frontiers journal article supplement (doi:10.3389/fvets.2024.1384028), 2024-04-25
Supplement: Data_Sheet_1.ZIP [file meta_all_hmdb_anno.xls]

Compound_ID	Name	Formula	HMDB_ID	tax_Kingdom	tax_SuperClass	tax_Class	tax_SubClass	tax_DirectParent	Source
Com_2_neg	2,3-Dinor-TXB2	C18H30O6	HMDB0002904	Organic compounds	Lipids and lipid-like molecules	Fatty Acyls	Eicosanoids	Thromboxanes	Endogenous;Food;Biological;Biofluid and excreta;Cell and elements;Subcellular;Biological process;Surfactant;Emulsifier;Membrane stabilizer;Energy source;Energy storage;Nutrient
Com_3_neg	Indolelactate	C11H11NO3	HMDB0000671	Organic compounds	Organoheterocyclic compounds	Indoles and derivatives	Indolyl carboxylic acids and derivatives	Indolyl carboxylic acids and derivatives	Endogenous;Biological;Tissue and substructures;Biofluid and excreta;Organ and components
Com_4_neg	Decanoic acid	C10H20O2	HMDB0000513	Organic compounds	Lipids and lipid-like molecules	Fatty Acyls	Fatty acids and conjugates	Medium-chain fatty acids	Endogenous;Food;Biological;Biological process;Membrane stabilizer;Energy source;Energy storage;Molecular messenger;Surfactant;Emulsifier
Com_5_neg	Maltotriose	C18H32O16	HMDB0001262	Organic compounds	Organic oxygen compounds	Organooxygen compounds	Carbohydrates and carbohydrate conjugates	Oligosaccharides	Endogenous;Food;Biological;Tissue and substructures;Organ and components;Biofluid and excreta;Subcellular;Cell and elements;Biological process;Drug metabolite;Waste product
Com_6_neg	12(S)-HETE	C20H32O3	HMDB0006111	Organic compounds	Lipids and lipid-like molecules	Fatty Acyls	Eicosanoids	Hydroxyeicosatetraenoic acids	Endogenous;Food;Biological;Tissue and substructures;Biofluid and excreta;Cell and elements;Subcellular;Biological process;Surfactant;Emulsifier;Membrane stabilizer;Energy source;Energy storage;Nutrient
Com_8_neg	1-Caffeoylquinic Acid	C16H18O9	HMDB0304633	Organic compounds	Organic oxygen compounds	Organooxygen compounds	Alcohols and polyols	Quinic acids and derivatives	-
Com_9_neg	D-Glucose 6-phosphate	C6H13O9P	HMDB0001401	Organic compounds	Organic oxygen compounds	Organooxygen compounds	Carbohydrates and carbohydrate conjugates	Hexose phosphates	Endogenous;Organ and components;Tissue and substructures;Cell and elements;Biofluid and excreta;Subcellular;Biological process
Com_10_neg	5'-Adenylic acid	C10H14N5O7P	HMDB0011617	Organic compounds	Organic oxygen compounds	Organooxygen compounds	Carbohydrates and carbohydrate conjugates	Pentose phosphates	Endogenous
Com_11_neg	UMP	C9H13N2O9P	HMDB0000288	Organic compounds	Nucleosides, nucleotides, and analogues	Pyrimidine nucleotides	Pyrimidine ribonucleotides	Pyrimidine ribonucleoside monophosphates	Endogenous;Food;Biological;Tissue and substructures;Biofluid and excreta;Subcellular;Cell and elements;Biological process;Pharmaceutical industry
Com_12_neg	L-Threonine	C4H9NO3	HMDB0000167	Organic compounds	Organic acids and derivatives	Carboxylic acids and derivatives	Amino acids, peptides, and analogues	L-alpha-amino acids	Food;Synthetic;Biological;Tissue and substructures;Organ and components;Biofluid and excreta;Subcellular;Cell and elements;Biological process;Drug;Personal care products;Food and nutrition;Pharmaceutical industry;Essential amino acid;Trace element
Com_13_neg	Deoxyguanosine	C10H13N5O4	HMDB0000085	Organic compounds	Nucleosides, nucleotides, and analogues	Purine nucleosides	Purine 2'-deoxyribonucleosides	Purine 2'-deoxyribonucleosides	Endogenous;Food;Biological;Tissue and substructures;Biofluid and excreta;Subcellular;Cell and elements;Biological process
Com_14_neg	Trehalose	C12H22O11	HMDB0000975	Organic compounds	Organic oxygen compounds	Organooxygen compounds	Carbohydrates and carbohydrate conjugates	O-glycosyl compounds	Endogenous;Food;Biological;Organ and components;Tissue and substructures;Biofluid and excreta;Cell and elements;Biological process;Pharmaceutical industry
Com_15_neg	L-Asparagine	C4H8N2O3	HMDB0000168	Organic compounds	Organic acids and derivatives	Carboxylic acids and derivatives	Amino acids, peptides, and analogues	Asparagine and derivatives	Endogenous;Food;Synthetic;Biological;Tissue and substructures;Organ and components;Biofluid and excreta;Subcellular;Cell and elements;Biological process;Environmental contaminant;Food and nutrition;Pharmaceutical industry;Essential amino acid;Trace element
Com_16_neg	15-Hete	C20H32O3	HMDB0003876	Organic compounds	Lipids and lipid-like molecules	Fatty Acyls	Eicosanoids	Hydroxyeicosatetraenoic acids	Endogenous;Food;Biological;Tissue and substructures;Biofluid and excreta;Cell and elements;Subcellular;Biological process;Surfactant;Emulsifier;Membrane stabilizer;Energy source;Energy storage;Nutrient
Com_17_neg	Shikimic Acid	C7H10O5	HMDB0003070	Organic compounds	Organic oxygen compounds	Organooxygen compounds	Alcohols and polyols	Shikimic acids and derivatves	Endogenous;Food;Biological;Subcellular;Biofluid and excreta
Com_18_neg	Beta-Alanine	C3H7NO2	HMDB0000056	Organic compounds	Organic acids and derivatives	Carboxylic acids and derivatives	Amino acids, peptides, and analogues	Beta amino acids and derivatives	Endogenous;Food;Synthetic;Biological;Organ and components;Tissue and substructures;Biofluid and excreta;Subcellular;Cell and elements;Biological process;Neurotoxin;Metabotoxin;Mitochondrial toxin;Molecular messenger;Environmental contaminant;Food and nutrition;Pharmaceutical industry
Com_20_neg	3-Hydroxypropanoic acid	C3H6O3	HMDB0000700	Organic compounds	Organic acids and derivatives	Hydroxy acids and derivatives	Beta hydroxy acids and derivatives	Beta hydroxy acids and derivatives	Endogenous;Food;Biological;Biofluid and excreta;Subcellular;Biological process;Acidogen;Metabotoxin;Pharmaceutical industry
Com_21_neg	Hydroxyphenyllactic acid	C9H10O4	HMDB0000755	Organic compounds	Phenylpropanoids and polyketides	Phenylpropanoic acids	-	Phenylpropanoic acids	Endogenous;Biological;Tissue and substructures;Organ and components;Subcellular;Biofluid and excreta
Com_22_neg	4-Hydroxyphenylethanol	C8H10O2	HMDB0004284	Organic compounds	Benzenoids	Phenols	Tyrosols and derivatives	Tyrosols	Endogenous;Food;Biological;Biofluid and excreta;Organ and components
Com_24_neg	13,14-dihydro-15-keto-PGD2	C20H32O5	HMDB0060042	Organic compounds	Lipids and lipid-like molecules	Fatty Acyls	Eicosanoids	Prostaglandins and related compounds	Food;Endogenous;Biological;Subcellular;Biofluid and excreta;Biological process;Nutrient;Inflammatory;Energy storage;Energy source;Membrane stabilizer;Modulator
Com_25_neg	dCMP	C9H14N3O7P	HMDB0001202	Organic compounds	Nucleosides, nucleotides, and analogues	Pyrimidine nucleotides	Pyrimidine deoxyribonucleotides	Pyrimidine 2'-deoxyribonucleoside monophosphates	Endogenous;Food;Biological;Subcellular;Biological process;Pharmaceutical industry
Com_26_neg	Pantetheine	C11H22N2O4S	HMDB0003426	Organic compounds	Organic acids and derivatives	Carboxylic acids and derivatives	Amino acids, peptides, and analogues	Beta amino acids and derivatives	Endogenous;Subcellular;Biological process
Com_27_neg	4-Hydroxy-2-oxoglutaric acid	C5H6O6	HMDB0002070	Organic compounds	Organic acids and derivatives	Keto acids and derivatives	Gamma-keto acids and derivatives	Gamma-keto acids and derivatives	Endogenous;Subcellular;Biological process
Com_29_neg	Undecanedioic acid	C11H20O4	HMDB0000888	Organic compounds	Lipids and lipid-like molecules	Fatty Acyls	Fatty acids and conjugates	Medium-chain fatty acids	Endogenous;Food;Biological;Subcellular;Biofluid and excreta;Biological process;Nutrient;Energy storage;Energy source;Membrane stabilizer
Com_30_neg	Nonadecanoic acid	C19H38O2	HMDB0000772	Organic compounds	Lipids and lipid-like molecules	Fatty Acyls	Fatty acids and conjugates	Long-chain fatty acids	Endogenous;Food;Biological;Tissue and substructures;Biofluid and excreta;Cell and elements;Subcellular;Biological process;Surfactant;Emulsifier;Membrane stabilizer;Energy source;Energy storage;Nutrient
Com_31_neg	Monobutyl phthalate	C12H14O4	HMDB0013247	Organic compounds	Benzenoids	Benzene and substituted derivatives	Benzoic acids and derivatives	Benzoic acid esters	Endogenous;Subcellular;Biofluid and excreta
Com_32_neg	D-Ribose	C5H10O5	HMDB0000283	Organic compounds	Organic oxygen compounds	Organooxygen compounds	Carbohydrates and carbohydrate conjugates	Pentoses	Endogenous;Food;Biological;Organ and components;Tissue and substructures;Biofluid and excreta;Cell and elements;Biological process;Molecular messenger
Com_33_neg	2-Hydroxy-3-methylbutanoic acid	C5H10O3	HMDB0000407	Organic compounds	Lipids and lipid-like molecules	Fatty Acyls	Fatty acids and conjugates	Hydroxy fatty acids	Endogenous;Food;Biological;Tissue and substructures;Biofluid and excreta;Subcellular;Cell and elements;Biological process;Surfactant;Emulsifier;Membrane stabilizer;Energy source;Energy storage;Nutrient
Com_35_neg	2-Oxoadipic acid	C6H8O5	HMDB0000225	Organic compounds	Organic acids and derivatives	Keto acids and derivatives	Medium-chain keto acids and derivatives	Medium-chain keto acids and derivatives	Endogenous;Food;Biological;Biofluid and excreta;Subcellular;Biological process;Acidogen;Metabotoxin
Com_36_neg	Phosphonotyrosine	C9H12NO6P	HMDB0006049	Organic compounds	Organic acids and derivatives	Carboxylic acids and derivatives	Amino acids, peptides, and analogues	Phenylalanine and derivatives	Endogenous;Biological process;Pharmaceutical industry
Com_37_neg	O-Desmethylnaproxen	C13H12O3	HMDB0013989	Organic compounds	Benzenoids	Naphthalenes	Naphthols and derivatives	Naphthols and derivatives	Endogenous;Organ and components;Biofluid and excreta;Cell and elements;Biological process;Pharmaceutical industry;Drug metabolite;Waste product
Com_38_neg	Nelarabine	C11H15N5O5	HMDB0015401	Organic compounds	Nucleosides, nucleotides, and analogues	Purine nucleosides	-	Purine nucleosides	-
Com_39_neg	N-Oleoyl Glycine	C20H37NO3	HMDB0241916	Organic compounds	Organoheterocyclic compounds	Diazines	Pyrimidines and pyrimidine derivatives	Pyrimidinecarboxylic acids and derivatives	-
Com_40_neg	Carbamoylphosphate	CH2NO5P--	HMDB0001096	Organic compounds	Organic acids and derivatives	Organic phosphoric acids and derivatives	-	Organic phosphoric acids and derivatives	Endogenous;Food;Biological;Organ and components;Biofluid and excreta;Subcellular;Biological process
Com_42_neg	ATP	C10H16N5O13P3	HMDB0000538	Organic compounds	Nucleosides, nucleotides, and analogues	Purine nucleotides	Purine ribonucleotides	Purine ribonucleoside triphosphates	Endogenous;Tissue and substructures;Organ and components;Biofluid and excreta;Subcellular;Cell and elements;Biological process;Trace element;Pharmaceutical industry;Food and nutrition
Com_43_neg	Anthranilic acid	C7H7NO2	HMDB0001123	Organic compounds	Benzenoids	Benzene and substituted derivatives	Benzoic acids and derivatives	Aminobenzoic acids	Food;Biological;Parenteral;Enteral;Tissue and substructures;Cell and elements;Biofluid and excreta;Subcellular;Biological process;Pharmaceutical industry
Com_44_neg	Alloxan	C4H4N2O5	HMDB0002818	Organic compounds	Organoheterocyclic compounds	Diazines	Pyrimidines and pyrimidine derivatives	Pyrimidones	Endogenous;Tissue and substructures;Organ and components;Cell and elements;Subcellular
Com_45_neg	cis-4-Hydroxy-D-proline	C5H9NO3	HMDB0060460	Organic compounds	Organic acids and derivatives	Carboxylic acids and derivatives	Amino acids, peptides, and analogues	Proline and derivatives	-
Com_46_neg	cholesteryl sulfate	C27H46O4S	HMDB0000653	Organic compounds	Lipids and lipid-like molecules	Steroids and steroid derivatives	Cholestane steroids	Cholesterols and derivatives	Endogenous;Food;Tissue and substructures;Cell and elements;Organ and components;Subcellular;Biofluid and excreta;Biological process;Membrane stabilizer;Energy source;Energy storage;Inflammatory;Molecular messenger;Surfactant;Emulsifier;Pharmaceutical industry
Com_47_neg	6-Phospho-D-glucono-1,5-lactone	C6H11O9P	HMDB0062628	Organic compounds	Organic oxygen compounds	Organooxygen compounds	Carbohydrates and carbohydrate conjugates	Hexose phosphates	-
Com_48_neg	6-Phospho-D-gluconate	C6H13O10P	HMDB0062800	Organic compounds	Organic oxygen compounds	Organooxygen compounds	Carbohydrates and carbohydrate conjugates	Monosaccharide phosphates	-
Com_49_neg	Acetyl phosphate	C2H5O5P	HMDB0001494	Organic compounds	Organic acids and derivatives	Organic phosphoric acids and derivatives	Phosphate esters	Acyl monophosphates	Endogenous;Biological process;Pharmaceutical industry;Energy source
Com_50_neg	ADP-ribose	C15H23N5O14P2	HMDB0001178	Organic compounds	Nucleosides, nucleotides, and analogues	Purine nucleotides	Purine nucleotide sugars	Purine nucleotide sugars	Endogenous;Tissue and substructures;Organ and components;Subcellular;Cell and elements;Biological process;Molecular messenger
Com_51_neg	Ala-trp	C14H17N3O3	HMDB0013209	Organic compounds	Organic acids and derivatives	Carboxylic acids and derivatives	Amino acids, peptides, and analogues	Dipeptides	Endogenous
Com_54_neg	Allolithocholic acid	C24H40O3	HMDB0000381	Organic compounds	Lipids and lipid-like molecules	Steroids and steroid derivatives	Bile acids, alcohols and derivatives	Monohydroxy bile acids, alcohols and derivatives	Endogenous;Food;Biological;Cell and elements;Tissue and substructures;Subcellular;Biofluid and excreta;Organ and components;Biological process;Surfactant;Emulsifier;Membrane stabilizer;Energy source;Energy storage;Molecular messenger
Com_55_neg	Isolithocholic acid	C24H40O3	HMDB0000717	Organic compounds	Lipids and lipid-like molecules	Steroids and steroid derivatives	Bile acids, alcohols and derivatives	Monohydroxy bile acids, alcohols and derivatives	Endogenous;Food;Biological;Cell and elements;Tissue and substructures;Subcellular;Biofluid and excreta;Organ and components;Biological process;Surfactant;Emulsifier;Membrane stabilizer;Energy source;Energy storage;Molecular messenger
Com_56_neg	D-Mannose 6-phosphate	C6H13O9P	HMDB0304312	Organic compounds	Organic oxygen compounds	Organooxygen compounds	Carbohydrates and carbohydrate conjugates	Hexose phosphates	-
Com_58_neg	m-Coumaric acid	C9H8O3	HMDB0001713	Organic compounds	Phenylpropanoids and polyketides	Cinnamic acids and derivatives	Hydroxycinnamic acids and derivatives	Hydroxycinnamic acids	Endogenous;Food;Biological
Com_59_neg	Isocitrate	C6H8O7	HMDB0304324	Organic compounds	Organic acids and derivatives	Carboxylic acids and derivatives	Tricarboxylic acids and derivatives	Tricarboxylic acids and derivatives	-
Com_61_neg	gamma-Muricholate	C24H40O5	HMDB0000760	Organic compounds	Lipids and lipid-like molecules	Steroids and steroid derivatives	Bile acids, alcohols and derivatives	Trihydroxy bile acids, alcohols and derivatives	Endogenous;Food;Biological;Cell and elements;Tissue and substructures;Subcellular;Biofluid and excreta;Organ and components;Biological process;Surfactant;Emulsifier;Membrane stabilizer;Energy source;Energy storage;Molecular messenger
Com_63_neg	L-Fucose	C6H12O5	HMDB0000174	Organic compounds	Organic oxygen compounds	Organooxygen compounds	Carbohydrates and carbohydrate conjugates	Hexoses	Endogenous;Food;Biological;Organ and components;Tissue and substructures;Biofluid and excreta;Subcellular;Cell and elements;Biological process;Pharmaceutical industry
Com_64_neg	Prostaglandin B2	C20H30O4	HMDB0004236	Organic compounds	Lipids and lipid-like molecules	Fatty Acyls	Eicosanoids	Prostaglandins and related compounds	Endogenous;Food;Biological;Biofluid and excreta;Cell and elements;Subcellular;Biological process;Surfactant;Emulsifier;Membrane stabilizer;Energy source;Energy storage;Nutrient;Inflammatory;Modulator
Com_65_neg	Uridine 5'-Diphospho-N-Acetylgalactosamine	C17H27N3O17P2	HMDB0000304	Organic compounds	Nucleosides, nucleotides, and analogues	Pyrimidine nucleotides	Pyrimidine nucleotide sugars	Pyrimidine nucleotide sugars	Endogenous;Subcellular;Tissue and substructures
Com_66_neg	D-Glucuronic acid	C6H10O7	HMDB0000127	Organic compounds	Organic oxygen compounds	Organooxygen compounds	Carbohydrates and carbohydrate conjugates	Glucuronic acid derivatives	Endogenous;Food;Biological;Tissue and substructures;Organ and components;Biofluid and excreta;Subcellular;Biological process;Drug metabolite;Waste product
Com_67_neg	L-Lactic acid	C3H6O3	HMDB0000190	Organic compounds	Organic acids and derivatives	Hydroxy acids and derivatives	Alpha hydroxy acids and derivatives	Alpha hydroxy acids and derivatives	Endogenous;Food;Biological;Tissue and substructures;Biofluid and excreta;Subcellular;Cell and elements;Biological process;Oncometabolite;Immunosuppresant;Acidogen;Metabotoxin
Com_68_neg	L-Malate	C4H6O5	HMDB0000156	Organic compounds	Organic acids and derivatives	Hydroxy acids and derivatives	Beta hydroxy acids and derivatives	Beta hydroxy acids and derivatives	Endogenous;Food;Biological;Tissue and substructures;Organ and components;Biofluid and excreta;Subcellular;Biological process;Pharmaceutical industry
Com_69_neg	3-Methyladipic acid	C7H12O4	HMDB0000555	Organic compounds	Lipids and lipid-like molecules	Fatty Acyls	Fatty acids and conjugates	Medium-chain fatty acids	Endogenous;Food;Biological;Biofluid and excreta;Subcellular;Cell and elements;Biological process;Surfactant;Emulsifier;Membrane stabilizer;Energy source;Energy storage;Nutrient
Com_70_neg	CTP	C9H16N3O14P3	HMDB0000082	Organic compounds	Organic oxygen compounds	Organooxygen compounds	Carbohydrates and carbohydrate conjugates	Pentose phosphates	Endogenous;Food;Biological;Tissue and substructures;Subcellular;Biological process;Pharmaceutical industry
Com_71_neg	Prostaglandin H2	C20H32O5	HMDB0001381	Organic compounds	Lipids and lipid-like molecules	Fatty Acyls	Eicosanoids	Prostaglandins and related compounds	Endogenous;Food;Biological;Biofluid and excreta;Subcellular;Cell and elements;Biological process;Surfactant;Emulsifier;Membrane stabilizer;Energy source;Energy storage;Nutrient;Inflammatory;Modulator
Com_72_neg	Prostaglandin D2	C20H32O5	HMDB0001403	Organic compounds	Lipids and lipid-like molecules	Fatty Acyls	Eicosanoids	Prostaglandins and related compounds	Endogenous;Food;Tissue and substructures;Organ and components;Biofluid and excreta;Subcellular;Cell and elements;Biological process;Surfactant;Emulsifier;Pharmaceutical industry;Membrane stabilizer;Energy source;Energy storage;Nutrient;Inflammatory;Modulator
Com_73_neg	Phosphocreatine	C4H10N3O5P	HMDB0001511	Organic compounds	Organic acids and derivatives	Carboxylic acids and derivatives	Amino acids, peptides, and analogues	Alpha amino acids and derivatives	Endogenous;Tissue and substructures;Cell and elements;Organ and components;Biofluid and excreta;Subcellular;Biological process;Pharmaceutical industry
Com_74_neg	L-Histidine	C6H9N3O2	HMDB0000177	Organic compounds	Organic acids and derivatives	Carboxylic acids and derivatives	Amino acids, peptides, and analogues	Histidine and derivatives	Food;Synthetic;Biological;Tissue and substructures;Organ and components;Biofluid and excreta;Subcellular;Cell and elements;Biological process;Drug;Personal care products;Food and nutrition;Pharmaceutical industry;Essential amino acid;Semiessential amino acid;Trace element
Com_75_neg	D-threo-Isocitric acid	C6H8O7	HMDB0001874	Organic compounds	Organic acids and derivatives	Carboxylic acids and derivatives	Tricarboxylic acids and derivatives	Tricarboxylic acids and derivatives	Endogenous;Food;Biological;Subcellular;Biofluid and excreta
Com_76_neg	Stearic acid	C18H36O2	HMDB0000827	Organic compounds	Lipids and lipid-like molecules	Fatty Acyls	Fatty acids and conjugates	Long-chain fatty acids	Endogenous;Food;Synthetic;Biological;Organ and components;Tissue and substructures;Biofluid and excreta;Subcellular;Cell and elements;Biological process;Metabolite;Membrane stabilizer;Energy source;Energy storage;Nutrient;Food and nutrition;Personal care products;Surfactant;Emulsifier;Pharmaceutical industry
Com_77_neg	3'-Dephospho-CoA	C21H35N7O13P2S	HMDB0001373	Organic compounds	Nucleosides, nucleotides, and analogues	Purine nucleotides	Purine ribonucleotides	Purine ribonucleoside diphosphates	Endogenous;Food;Biological;Subcellular;Biological process
Com_78_neg	L-Homoserine	C4H9NO3	HMDB0000719	Organic compounds	Organic acids and derivatives	Carboxylic acids and derivatives	Amino acids, peptides, and analogues	L-alpha-amino acids	Endogenous;Food;Biological;Organ and components;Biofluid and excreta;Cell and elements;Biological process;Pharmaceutical industry
Com_79_neg	DL-o-Tyrosine	C9H11NO3	HMDB0006050	Organic compounds	Organic acids and derivatives	Carboxylic acids and derivatives	Amino acids, peptides, and analogues	Phenylalanine and derivatives	Endogenous
Com_80_neg	D-Lactic acid	C3H6O3	HMDB0001311	Organic compounds	Organic acids and derivatives	Hydroxy acids and derivatives	Alpha hydroxy acids and derivatives	Alpha hydroxy acids and derivatives	Endogenous;Food;Biological;Organ and components;Tissue and substructures;Biofluid and excreta;Cell and elements;Subcellular;Biological process;Pharmaceutical industry
Com_81_neg	Dihydroxyacetone phosphate	C3H7O6P	HMDB0001473	Organic compounds	Organic oxygen compounds	Organooxygen compounds	Carbohydrates and carbohydrate conjugates	Monosaccharide phosphates	Endogenous;Food;Biological;Tissue and substructures;Biofluid and excreta;Subcellular;Biological process;Pharmaceutical industry
Com_82_neg	Sucrose	C12H22O11	HMDB0000258	Organic compounds	Organic oxygen compounds	Organooxygen compounds	Carbohydrates and carbohydrate conjugates	O-glycosyl compounds	Food;Endogenous;Biological;Subcellular;Organ and components;Tissue and substructures;Biofluid and excreta;Cell and elements;Biological process;Drug;Pharmaceutical industry
Com_84_neg	D-Xylulose 5-phosphate	C5H11O8P	HMDB0000868	Organic compounds	Organic oxygen compounds	Organooxygen compounds	Carbohydrates and carbohydrate conjugates	Pentose phosphates	Endogenous;Food;Biological;Subcellular;Biological process;Pharmaceutical industry
Com_85_neg	D-Xylonate	C5H10O6	HMDB0242170	Organic compounds	Organic oxygen compounds	Organooxygen compounds	Carbohydrates and carbohydrate conjugates	Sugar acids and derivatives	-
Com_86_neg	dUMP	C9H13N2O8P	HMDB0001409	Organic compounds	Nucleosides, nucleotides, and analogues	Pyrimidine nucleotides	Pyrimidine deoxyribonucleotides	Pyrimidine 2'-deoxyribonucleoside monophosphates	Endogenous;Food;Biological;Subcellular;Biological process;Pharmaceutical industry
Com_87_neg	Fosfomycin	C3H7O4P	HMDB0014966	Organic compounds	Organic acids and derivatives	Organic phosphonic acids and derivatives	Organic phosphonic acids	Organic phosphonic acids	-
Com_88_neg	Ethylmalonate	C5H8O4	HMDB0000622	Organic compounds	Lipids and lipid-like molecules	Fatty Acyls	Fatty acids and conjugates	Branched fatty acids	Endogenous;Food;Biological;Tissue and substructures;Organ and components;Biofluid and excreta;Cell and elements;Subcellular;Biological process;Acidogen;Metabotoxin;Surfactant;Emulsifier;Membrane stabilizer;Energy source;Energy storage;Nutrient
Com_90_neg	Methylmalonate	C4H6O4	HMDB0000202	Organic compounds	Organic acids and derivatives	Carboxylic acids and derivatives	Dicarboxylic acids and derivatives	Dicarboxylic acids and derivatives	Endogenous;Tissue and substructures;Organ and components;Biofluid and excreta;Subcellular;Biological process;Pharmaceutical industry;Acidogen;Metabotoxin
Com_91_neg	Dulcitol	C6H14O6	HMDB0011632	Organic compounds	Organic oxygen compounds	Organooxygen compounds	Carbohydrates and carbohydrate conjugates	Sugar alcohols	Endogenous;Food;Biological;Biofluid and excreta;Cell and elements;Subcellular;Biological process;Surfactant;Emulsifier;Membrane stabilizer;Energy source;Energy storage
Com_92_neg	Gluconolactone	C6H10O6	HMDB0000150	Organic compounds	Organic oxygen compounds	Organooxygen compounds	Carbohydrates and carbohydrate conjugates	Gluconolactones	Endogenous;Subcellular;Biofluid and excreta;Biological process;Pharmaceutical industry;Food and nutrition
Com_93_neg	Sebacic acid	C10H18O4	HMDB0000792	Organic compounds	Lipids and lipid-like molecules	Fatty Acyls	Fatty acids and conjugates	Medium-chain fatty acids	Endogenous;Food;Synthetic;Subcellular;Biofluid and excreta;Biological process;Nutrient;Energy storage;Energy source;Membrane stabilizer;Personal care products;Pharmaceutical industry
Com_94_neg	Tiglic acid	C5H8O2	HMDB0001470	Organic compounds	Lipids and lipid-like molecules	Fatty Acyls	Fatty acids and conjugates	Methyl-branched fatty acids	Endogenous;Food;Biological;Biofluid and excreta;Cell and elements;Subcellular;Biological process;Surfactant;Emulsifier;Membrane stabilizer;Energy source;Energy storage;Nutrient
Com_95_neg	4-Hydroxyphenylpyruvate	C9H8O4	HMDB0000707	Organic compounds	Benzenoids	Benzene and substituted derivatives	Phenylpyruvic acid derivatives	Phenylpyruvic acid derivatives	Endogenous;Biological;Tissue and substructures;Organ and components;Biofluid and excreta;Subcellular;Biological process;Pharmaceutical industry
Com_96_neg	Oxaloacetate	C4H4O5	HMDB0000223	Organic compounds	Organic acids and derivatives	Keto acids and derivatives	Short-chain keto acids and derivatives	Short-chain keto acids and derivatives	Endogenous;Food;Biological;Organ and components;Biofluid and excreta;Subcellular;Biological process
Com_97_neg	Tetrahydroaldosterone	C21H32O5	HMDB0258895	Organic compounds	Organoheterocyclic compounds	Oxepanes	-	Oxepanes	-
Com_98_neg	Tolfenamic acid	C14H12ClNO2	HMDB0042043	Organic compounds	Benzenoids	Benzene and substituted derivatives	Benzoic acids and derivatives	Aminobenzoic acids	-
Com_102_neg	2-Hydroxyisocaproic Acid	C6H12O3	HMDB0000665	Organic compounds	Lipids and lipid-like molecules	Fatty Acyls	Fatty acids and conjugates	Hydroxy fatty acids	Endogenous;Food;Biological;Biofluid and excreta;Cell and elements;Subcellular;Biological process;Surfactant;Emulsifier;Membrane stabilizer;Energy source;Energy storage;Nutrient
Com_103_neg	Trehalose 6-phosphate	C12H23O14P	HMDB0001124	Organic compounds	Organic oxygen compounds	Organooxygen compounds	Carbohydrates and carbohydrate conjugates	Disaccharide phosphates	Endogenous;Food;Biological;Pharmaceutical industry
Com_104_neg	Citicoline	C14H26N4O11P2	HMDB0001413	Organic compounds	Organoheterocyclic compounds	Pteridines and derivatives	Pterins and derivatives	Pterins and derivatives	Endogenous;Food;Biological;Tissue and substructures;Organ and components;Subcellular;Biological process;Pharmaceutical industry
Com_107_neg	scyllo-Inositol	C6H12O6	HMDB0006088	Organic compounds	Organic oxygen compounds	Organooxygen compounds	Alcohols and polyols	Cyclohexanols	Biological;Biofluid and excreta;Biological process
Com_108_neg	Succinic acid	C4H6O4	HMDB0000254	Organic compounds	Organic acids and derivatives	Carboxylic acids and derivatives	Dicarboxylic acids and derivatives	Dicarboxylic acids and derivatives	Endogenous;Food;Biological;Organ and components;Tissue and substructures;Biofluid and excreta;Cell and elements;Subcellular;Biological process;Trace element;Food and nutrition;Pharmaceutical industry
Com_109_neg	Thymidine	C10H14N2O5	HMDB0000273	Organic compounds	Nucleosides, nucleotides, and analogues	Pyrimidine nucleosides	Pyrimidine 2'-deoxyribonucleosides	Pyrimidine 2'-deoxyribonucleosides	Endogenous;Food;Biological;Organ and components;Tissue and substructures;Biofluid and excreta;Cell and elements;Subcellular;Biological process;Metabolite;Pharmaceutical industry
Com_110_neg	Cytosine	C4H5N3O	HMDB0000630	Organic compounds	Organoheterocyclic compounds	Diazines	Pyrimidines and pyrimidine derivatives	Pyrimidones	Endogenous;Food;Biological;Organ and components;Tissue and substructures;Cell and elements;Biofluid and excreta
Com_111_neg	Xanthurenic Acid	C10H7NO4	HMDB0000881	Organic compounds	Organoheterocyclic compounds	Quinolines and derivatives	Quinoline carboxylic acids	Quinoline carboxylic acids	Endogenous;Tissue and substructures;Biofluid and excreta;Subcellular;Biological process
Com_112_neg	cis-Aconitic acid	C6H6O6	HMDB0000072	Organic compounds	Organic acids and derivatives	Carboxylic acids and derivatives	Tricarboxylic acids and derivatives	Tricarboxylic acids and derivatives	Endogenous;Food;Biological;Organ and components;Biofluid and excreta;Subcellular;Biological process
Com_113_neg	Riboflavin-5-phosphate	C17H21N4O9P	HMDB0001520	Organic compounds	Nucleosides, nucleotides, and analogues	Flavin nucleotides	-	Flavin nucleotides	Endogenous;Food;Biological;Tissue and substructures;Cell and elements;Biofluid and excreta;Subcellular;Biological process;Pharmaceutical industry
Com_114_neg	D-Glucopyranose	C6H12O6	HMDB0304632	Organic compounds	Organic oxygen compounds	Organooxygen compounds	Carbohydrates and carbohydrate conjugates	Hexoses	-
Com_115_neg	Prostaglandin I2	C20H32O5	HMDB0001335	Organic compounds	Lipids and lipid-like molecules	Fatty Acyls	Eicosanoids	Prostaglandins and related compounds	Endogenous;Food;Biological;Organ and components;Tissue and substructures;Biofluid and excreta;Cell and elements;Subcellular;Biological process;Surfactant;Emulsifier;Membrane stabilizer;Energy source;Energy storage;Nutrient;Inflammatory;Modulator
Com_116_neg	Pyruvic Acid	C3H4O3	HMDB0000243	Organic compounds	Organic acids and derivatives	Keto acids and derivatives	Alpha-keto acids and derivatives	Alpha-keto acids and derivatives	Endogenous;Food;Biological;Tissue and substructures;Organ and components;Biofluid and excreta;Cell and elements;Subcellular;Biological process;Food and nutrition;Pharmaceutical industry;Energy source;Antioxidant;Metabolite
Com_117_neg	Pyrophosphate	H4O7P2	HMDB0000250	Inorganic compounds	Homogeneous non-metal compounds	Non-metal oxoanionic compounds	Non-metal pyrophosphates	Non-metal pyrophosphates	Endogenous;Food;Biological;Cell and elements;Tissue and substructures;Organ and components;Biofluid and excreta;Subcellular;Biological process;Metabotoxin;Osteotoxin;Arthritogen
Com_118_neg	Prostaglandin G2	C20H32O6	HMDB0003235	Organic compounds	Lipids and lipid-like molecules	Fatty Acyls	Eicosanoids	Prostaglandins and related compounds	Endogenous;Food;Biofluid and excreta;Cell and elements;Subcellular;Biological process;Surfactant;Emulsifier;Pharmaceutical industry;Membrane stabilizer;Energy source;Energy storage;Nutrient;Inflammatory;Modulator
Com_120_neg	1-Dodecanol	C12H26O	HMDB0011626	Organic compounds	Lipids and lipid-like molecules	Fatty Acyls	Fatty alcohols	Fatty alcohols	Endogenous;Food;Biological;Biofluid and excreta;Cell and elements;Subcellular;Biological process;Membrane stabilizer;Energy source;Energy storage;Nutrient;Surfactant;Emulsifier;Pharmaceutical industry
Com_121_neg	Succinic anhydride	C4H4O3	HMDB0032523	Organic compounds	Organic acids and derivatives	Carboxylic acids and derivatives	Dicarboxylic acids and derivatives	Dicarboxylic acids and derivatives	Endogenous;Food;Subcellular;Cell and elements
Com_122_neg	Hydantoin-5-propionic acid	C6H8N2O4	HMDB0001212	Organic compounds	Organoheterocyclic compounds	Azolidines	Imidazolidines	Hydantoins	Endogenous
Com_123_neg	Indoleacetaldehyde	C10H9NO	HMDB0001190	Organic compounds	Organoheterocyclic compounds	Indoles and derivatives	Indoles	3-alkylindoles	Endogenous;Food;Biological;Biofluid and excreta;Subcellular;Biological process
Com_124_neg	Dimethylmalonic acid	C5H8O4	HMDB0002001	Organic compounds	Organic acids and derivatives	Carboxylic acids and derivatives	Dicarboxylic acids and derivatives	Dicarboxylic acids and derivatives	Endogenous
Com_125_neg	Glucotropaeolin	C14H19NO9S2	HMDB0038419	Organic compounds	Organic oxygen compounds	Organooxygen compounds	Carbohydrates and carbohydrate conjugates	Alkylglucosinolates	Food;Biological;Subcellular;Cell and elements;Nutrient
Com_126_neg	Diflunisal	C13H8F2O3	HMDB0014999	Organic compounds	Benzenoids	Benzene and substituted derivatives	Biphenyls and derivatives	Biphenyls and derivatives	-
Com_127_neg	Hexadecanedioate	C16H30O4	HMDB0304377	Organic compounds	Lipids and lipid-like molecules	Fatty Acyls	Fatty acids and conjugates	Long-chain fatty acids	-
Com_129_neg	3-Phosphoglyceric acid	C3H8NaO6P	HMDB0000807	Organic compounds	Organic oxygen compounds	Organooxygen compounds	Carbohydrates and carbohydrate conjugates	Sugar acids and derivatives	Endogenous;Tissue and substructures;Organ and components;Biofluid and excreta;Subcellular;Biological process
Com_130_neg	5,6-Dihydroxyindole-2-Carboxylic Acid	C9H7NO4	HMDB0001253	Organic compounds	Organoheterocyclic compounds	Indoles and derivatives	Indolecarboxylic acids and derivatives	Indolecarboxylic acids and derivatives	Endogenous;Subcellular;Biological process
Com_131_neg	4-Pyridoxic acid	C8H9NO4	HMDB0000017	Organic compounds	Organoheterocyclic compounds	Pyridines and derivatives	Pyridinecarboxylic acids and derivatives	Pyridinecarboxylic acids	Endogenous;Tissue and substructures;Organ and components;Biofluid and excreta;Subcellular;Cell and elements;Biological process
Com_133_neg	APS	C10H14N5O10PS	HMDB0001003	Organic compounds	Nucleosides, nucleotides, and analogues	Purine nucleotides	Purine ribonucleotides	Purine ribonucleoside monophosphates	Endogenous;Food;Biological;Organ and components;Cell and elements;Subcellular;Biological process;Pharmaceutical industry
Com_134_neg	5-Phosphoribosyl 1-pyrophosphate	C5H13O14P3	HMDB0062643	Organic compounds	Organic oxygen compounds	Organooxygen compounds	Carbohydrates and carbohydrate conjugates	Pentose phosphates	-
Com_135_neg	2-Phenylbutyric acid	C10H12O2	HMDB0000329	Organic compounds	Benzenoids	Benzene and substituted derivatives	Phenylpropanes	Phenylpropanes	Endogenous
Com_136_neg	Galactaric acid	C6H10O8	HMDB0000639	Organic compounds	Organic oxygen compounds	Organooxygen compounds	Carbohydrates and carbohydrate conjugates	Glucuronic acid derivatives	Endogenous;Food;Biological;Subcellular;Biofluid and excreta
Com_137_neg	6-keto PGE1	C20H32O6	HMDB0004241	Organic compounds	Lipids and lipid-like molecules	Fatty Acyls	Eicosanoids	Prostaglandins and related compounds	Endogenous;Food;Biological;Biofluid and excreta;Cell and elements;Subcellular;Biological process;Surfactant;Emulsifier;Membrane stabilizer;Energy source;Energy storage;Nutrient;Inflammatory;Modulator
Com_138_neg	Pimelic acid	C7H12O4	HMDB0000857	Organic compounds	Lipids and lipid-like molecules	Fatty Acyls	Fatty acids and conjugates	Medium-chain fatty acids	Endogenous;Food;Subcellular;Biofluid and excreta;Biological process;Pharmaceutical industry;Nutrient;Energy storage;Energy source;Membrane stabilizer
Com_139_neg	Palmitaldehyde	C16H32O	HMDB0001551	Organic compounds	Lipids and lipid-like molecules	Fatty Acyls	Fatty aldehydes	Fatty aldehydes	Endogenous;Food;Biological;Biofluid and excreta;Cell and elements;Subcellular;Biological process;Membrane stabilizer;Energy source;Energy storage;Nutrient;Surfactant;Emulsifier;Pharmaceutical industry
Com_141_neg	Taurocholic acid	C26H45NO7S	HMDB0000036	Organic compounds	Lipids and lipid-like molecules	Steroids and steroid derivatives	Bile acids, alcohols and derivatives	Trihydroxy bile acids, alcohols and derivatives	Endogenous;Food;Biological;Tissue and substructures;Subcellular;Organ and components;Cell and elements;Biofluid and excreta;Biological process;Membrane stabilizer;Energy source;Energy storage;Molecular messenger;Surfactant;Emulsifier
Com_142_neg	Cytidine 5'-Monophosphate-N-Acetylneuraminic Acid	C20H30N4NaO16P	HMDB0001176	Organic compounds	Nucleosides, nucleotides, and analogues	Pyrimidine nucleotides	Pyrimidine nucleotide sugars	Pyrimidine nucleotide sugars	Endogenous;Tissue and substructures;Subcellular;Biological process;Pharmaceutical industry
Com_144_neg	D-Mannose	C6H12O6	HMDB0000169	Organic compounds	Organic oxygen compounds	Organooxygen compounds	Carbohydrates and carbohydrate conjugates	Hexoses	Endogenous;Food;Biological;Organ and components;Tissue and substructures;Biofluid and excreta;Subcellular;Cell and elements;Biological process
Com_145_neg	dTMP	C10H15N2O8P	HMDB0001227	Organic compounds	Nucleosides, nucleotides, and analogues	Pyrimidine nucleotides	Pyrimidine deoxyribonucleotides	Pyrimidine 2'-deoxyribonucleoside monophosphates	Endogenous;Food;Biological;Cell and elements;Biofluid and excreta;Subcellular;Biological process;Pharmaceutical industry
Com_146_neg	N-acetyl-L-ornithine	C7H14N2O3	HMDB0240589	Organic compounds	Organic acids and derivatives	Carboxylic acids and derivatives	Amino acids, peptides, and analogues	L-alpha-amino acids	-
Com_147_neg	Aminomalonic acid	C3H5NO4	HMDB0001147	Organic compounds	Organic acids and derivatives	Carboxylic acids and derivatives	Amino acids, peptides, and analogues	Alpha amino acids	Endogenous;Pharmaceutical industry
Com_148_neg	TPP	C12H19ClN4O7P2S	HMDB0259262	Organic compounds	Organic acids and derivatives	Organic phosphoric acids and derivatives	Phosphate esters	Aryl phosphotriesters	-
Com_149_neg	Homoarginine	C7H16N4O2	HMDB0000670	Organic compounds	Organic acids and derivatives	Carboxylic acids and derivatives	Amino acids, peptides, and analogues	L-alpha-amino acids	Endogenous;Food;Biological;Tissue and substructures;Organ and components;Subcellular;Biofluid and excreta;Pharmaceutical industry
Com_151_neg	Tetradecanedioic acid	C14H26O4	HMDB0000872	Organic compounds	Lipids and lipid-like molecules	Fatty Acyls	Fatty acids and conjugates	Long-chain fatty acids	Endogenous;Food;Biological;Subcellular;Biofluid and excreta;Biological process;Nutrient;Energy storage;Energy source;Membrane stabilizer
Com_152_neg	Taurine	C2H7NO3S	HMDB0000251	Organic compounds	Organic acids and derivatives	Organic sulfonic acids and derivatives	Organosulfonic acids and derivatives	Organosulfonic acids	Endogenous;Food;Biological;Organ and components;Tissue and substructures;Biofluid and excreta;Cell and elements;Subcellular;Biological process;Food and nutrition;Pharmaceutical industry;Osmolyte;Essential amino acid;Antioxidant
Com_153_neg	N-Acetyl-DL-phenylalanine	C11H13NO3	HMDB0255056	Organic compounds	Organic acids and derivatives	Carboxylic acids and derivatives	Amino acids, peptides, and analogues	Phenylalanine and derivatives	-
Com_154_neg	Sulfoacetic acid	C2H4O5S	HMDB0258590	Organic compounds	Organic acids and derivatives	Organic sulfonic acids and derivatives	Organosulfonic acids and derivatives	Organosulfonic acids	-
Com_155_neg	Thymidine 5'-diphosphate	C10H16N2O11P2	HMDB0001274	Organic compounds	Nucleosides, nucleotides, and analogues	Pyrimidine nucleotides	Pyrimidine deoxyribonucleotides	Pyrimidine 2'-deoxyribonucleoside diphosphates	Endogenous;Food;Biological;Subcellular;Biological process;Pharmaceutical industry
Com_157_neg	Uric Acid	C5H4N4O3	HMDB0000289	Organic compounds	Organoheterocyclic compounds	Imidazopyrimidines	Purines and purine derivatives	Xanthines	Endogenous;Food;Biological;Organ and components;Tissue and substructures;Biofluid and excreta;Cell and elements;Subcellular;Biological process;Pharmaceutical industry;Drug metabolite;Waste product;Metabolite
Com_158_neg	Ribose 1-phosphate	C5H11O8P	HMDB0001489	Organic compounds	Organic oxygen compounds	Organooxygen compounds	Carbohydrates and carbohydrate conjugates	Pentoses	Endogenous;Food;Biological;Subcellular;Biological process;Pharmaceutical industry
Com_159_neg	Sedoheptulose 7-phosphate	C7H13BaO10P	HMDB0258206	Organic compounds	Organic oxygen compounds	Organooxygen compounds	Carbohydrates and carbohydrate conjugates	Monosaccharide phosphates	-
Com_160_neg	Sedoheptulose 1,7-bisphosphate	C7H16O13P2	HMDB0060274	Organic compounds	Organic oxygen compounds	Organooxygen compounds	Carbohydrates and carbohydrate conjugates	Monosaccharide phosphates	-
Com_161_neg	dGDP	C10H15N5O10P2	HMDB0000960	Organic compounds	Phenylpropanoids and polyketides	Cinnamic acids and derivatives	Hydroxycinnamic acids and derivatives	Hydroxycinnamic acids	Endogenous;Food;Biological;Subcellular;Biological process;Pharmaceutical industry
Com_162_neg	D-Galactonic acid	C6H12O7	HMDB0253886	Organic compounds	Organic acids and derivatives	Hydroxy acids and derivatives	Medium-chain hydroxy acids and derivatives	Medium-chain hydroxy acids and derivatives	-
Com_163_neg	D-Gluconic acid	C6H12O7	HMDB0303730	Organic compounds	Organic acids and derivatives	Hydroxy acids and derivatives	Medium-chain hydroxy acids and derivatives	Medium-chain hydroxy acids and derivatives	-
Com_164_neg	D-Glucarate	C6H10O8	HMDB0000663	Organic compounds	Organic oxygen compounds	Organooxygen compounds	Carbohydrates and carbohydrate conjugates	Glucuronic acid derivatives	Endogenous;Food;Biological;Cell and elements;Organ and components;Subcellular;Biofluid and excreta;Pharmaceutical industry
Com_165_neg	UDP	C9H14N2O12P2	HMDB0000295	Organic compounds	Nucleosides, nucleotides, and analogues	Pyrimidine nucleotides	Pyrimidine ribonucleotides	Pyrimidine ribonucleoside diphosphates	Endogenous;Food;Biological;Organ and components;Tissue and substructures;Biofluid and excreta;Subcellular;Cell and elements;Biological process;Pharmaceutical industry
Com_166_neg	D-Erythrose 4-phosphate	C4H9O7P	HMDB0001321	Organic compounds	Organic oxygen compounds	Organooxygen compounds	Carbohydrates and carbohydrate conjugates	Monosaccharide phosphates	Endogenous;Food;Biological;Subcellular;Biological process;Pharmaceutical industry
Com_167_neg	D-Fructose 1,6-bisphosphate	C6H14O12P2	HMDB0001058	Organic compounds	Organic oxygen compounds	Organooxygen compounds	Carbohydrates and carbohydrate conjugates	Hexose phosphates	Endogenous;Food;Biological;Tissue and substructures;Biofluid and excreta;Subcellular;Biological process;Pharmaceutical industry
Com_168_neg	dATP	C10H16N5O12P3	HMDB0001532	Organic compounds	Nucleosides, nucleotides, and analogues	Purine nucleotides	Purine deoxyribonucleotides	Purine 2'-deoxyribonucleoside triphosphates	Endogenous;Food;Biological;Subcellular;Biological process;Immunotoxin;Metabotoxin;Pharmaceutical industry
Com_170_neg	Octanedioic acid	C8H14O4	HMDB0000893	Organic compounds	Lipids and lipid-like molecules	Fatty Acyls	Fatty acids and conjugates	Medium-chain fatty acids	Endogenous;Food;Biological;Subcellular;Biofluid and excreta;Organ and components;Biological process;Nutrient;Energy storage;Energy source;Membrane stabilizer
Com_171_neg	N-Acetyl-D-glucosamine	C8H15NO6	HMDB0000215	Organic compounds	Organic oxygen compounds	Organooxygen compounds	Carbohydrates and carbohydrate conjugates	Acylaminosugars	Endogenous;Food;Biological;Tissue and substructures;Cell and elements;Organ and components;Biofluid and excreta;Subcellular;Biological process;Drug;Food and nutrition
Com_172_neg	2-Hydroxybutyric acid	C4H8O3	HMDB0000008	Organic compounds	Organic acids and derivatives	Hydroxy acids and derivatives	Alpha hydroxy acids and derivatives	Alpha hydroxy acids and derivatives	Endogenous;Tissue and substructures;Organ and components;Biofluid and excreta;Subcellular;Cell and elements;Biological process;Metabolite
Com_173_neg	N-Acetyl-L-methionine	C7H13NO3S	HMDB0011745	Organic compounds	Organic acids and derivatives	Carboxylic acids and derivatives	Amino acids, peptides, and analogues	Methionine and derivatives	Endogenous
Com_174_neg	(R)-3-Hydroxyisobutyric acid	C4H8O3	HMDB0000336	Organic compounds	Organic acids and derivatives	Hydroxy acids and derivatives	Beta hydroxy acids and derivatives	Beta hydroxy acids and derivatives	Endogenous
Com_175_neg	2-Hydroxybutanoic acid	C4H8O3	HMDB0000008	Organic compounds	Organic acids and derivatives	Hydroxy acids and derivatives	Alpha hydroxy acids and derivatives	Alpha hydroxy acids and derivatives	Endogenous;Tissue and substructures;Organ and components;Biofluid and excreta;Subcellular;Cell and elements;Biological process;Metabolite
Com_176_neg	N-Acetyl-L-tyrosine	C11H13NO4	HMDB0000866	Organic compounds	Organic acids and derivatives	Carboxylic acids and derivatives	Amino acids, peptides, and analogues	Tyrosine and derivatives	Endogenous;Subcellular;Biofluid and excreta;Pharmaceutical industry
Com_177_neg	Itaconic acid	C5H6O4	HMDB0002092	Organic compounds	Lipids and lipid-like molecules	Fatty Acyls	Fatty acids and conjugates	Branched fatty acids	Endogenous;Food;Biological;Subcellular;Biofluid and excreta;Biological process;Nutrient;Energy storage;Energy source;Membrane stabilizer
Com_179_neg	DL-Serine	C3H7NO3	HMDB0003406	Organic compounds	Organic acids and derivatives	Carboxylic acids and derivatives	Amino acids, peptides, and analogues	Serine and derivatives	Endogenous;Food;Biological;Subcellular;Organ and components;Tissue and substructures;Biofluid and excreta;Cell and elements;Biological process;Pharmaceutical industry
Com_180_neg	Irbesartan	C25H28N6O	HMDB0015163	Organic compounds	Benzenoids	Benzene and substituted derivatives	Biphenyls and derivatives	Biphenyls and derivatives	-
Com_181_neg	Hydroquinone	C6H6O2	HMDB0002434	Organic compounds	Benzenoids	Phenols	Benzenediols	Hydroquinones	Food;Synthetic;Environmental;Biological;Tissue and substructures;Cell and elements;Organ and components;Biofluid and excreta;Subcellular;Biological process;Carcinogen;Air pollutant;Hazardous air pollutant;Cosmetic;Personal care products;Pharmaceutical industry
Com_183_neg	L-Arabinose	C5H10O5	HMDB0000646	Organic compounds	Organic oxygen compounds	Organooxygen compounds	Carbohydrates and carbohydrate conjugates	Pentoses	Endogenous;Food;Biological;Organ and components;Cell and elements;Biofluid and excreta
Com_184_neg	D-3-Phenyllactic acid	C9H10O3	HMDB0000748	Organic compounds	Phenylpropanoids and polyketides	Phenylpropanoic acids	-	Phenylpropanoic acids	Endogenous;Biological
Com_187_neg	Cytidine-5'-monophosphate	C9H14N3O8P	HMDB0000095	Organic compounds	Nucleosides, nucleotides, and analogues	Pyrimidine nucleotides	Pyrimidine ribonucleotides	Pyrimidine ribonucleoside monophosphates	Endogenous;Food;Biological;Tissue and substructures;Organ and components;Biofluid and excreta;Cell and elements;Subcellular;Biological process;Pharmaceutical industry
Com_188_neg	L-Pyroglutamic acid	C5H7NO3	HMDB0000267	Organic compounds	Organic acids and derivatives	Carboxylic acids and derivatives	Amino acids, peptides, and analogues	Alpha amino acids and derivatives	Endogenous;Food;Biological;Tissue and substructures;Organ and components;Biofluid and excreta;Subcellular;Biological process;Metabotoxin;Acidogen;Pharmaceutical industry;Essential amino acid
Com_189_neg	Citric acid	C6H8O7	HMDB0000094	Organic compounds	Organic acids and derivatives	Carboxylic acids and derivatives	Tricarboxylic acids and derivatives	Tricarboxylic acids and derivatives	Endogenous;Food;Synthetic;Biological;Tissue and substructures;Organ and components;Biofluid and excreta;Subcellular;Cell and elements;Biological process;Food and nutrition;Personal care products;Chelating agent;Household products;Pharmaceutical industry
Com_191_neg	Lactobionic acid	C12H22O12	HMDB0253945	Organic compounds	Lipids and lipid-like molecules	Fatty Acyls	Fatty acyl glycosides	Fatty acyl glycosides of mono- and disaccharides	-
Com_192_neg	Fumaric acid	C4H4O4	HMDB0000134	Organic compounds	Organic acids and derivatives	Carboxylic acids and derivatives	Dicarboxylic acids and derivatives	Dicarboxylic acids and derivatives	Endogenous;Food;Synthetic;Biological;Tissue and substructures;Organ and components;Biofluid and excreta;Cell and elements;Subcellular;Biological process;Membrane stabilizer;Energy source;Energy storage;Air pollutant;Food and nutrition;Personal care products;Surfactant;Emulsifier;Pharmaceutical industry
Com_193_neg	L-Arabinitol	C5H12O5	HMDB0001851	Organic compounds	Organic oxygen compounds	Organooxygen compounds	Carbohydrates and carbohydrate conjugates	Sugar alcohols	Endogenous;Food;Biological;Cell and elements;Biofluid and excreta
Com_196_neg	Lactic acid	C3H6O3	HMDB0001311	Organic compounds	Organic acids and derivatives	Hydroxy acids and derivatives	Alpha hydroxy acids and derivatives	Alpha hydroxy acids and derivatives	Endogenous;Food;Biological;Organ and components;Tissue and substructures;Biofluid and excreta;Cell and elements;Subcellular;Biological process;Pharmaceutical industry
Com_197_neg	L-Cysteinesulfinic acid	C3H7NO4S	HMDB0000996	Organic compounds	Organic acids and derivatives	Carboxylic acids and derivatives	Amino acids, peptides, and analogues	L-alpha-amino acids	Endogenous;Tissue and substructures;Biofluid and excreta;Subcellular;Biological process;Pharmaceutical industry
Com_198_neg	L-Homocystine	C8H16N2O4S2	HMDB0000676	Organic compounds	Organic acids and derivatives	Carboxylic acids and derivatives	Amino acids, peptides, and analogues	L-alpha-amino acids	Endogenous;Subcellular;Biofluid and excreta
Com_205_neg	4-Hydroxyphenyllactate	C9H10O4	HMDB0000755	Organic compounds	Phenylpropanoids and polyketides	Phenylpropanoic acids	-	Phenylpropanoic acids	Endogenous;Biological;Tissue and substructures;Organ and components;Subcellular;Biofluid and excreta
Com_206_neg	D-Glucosamine 6-phosphate	C6H14NO8P	HMDB0001254	Organic compounds	Organic oxygen compounds	Organooxygen compounds	Carbohydrates and carbohydrate conjugates	Hexose phosphates	Endogenous;Tissue and substructures;Subcellular;Biological process;Pharmaceutical industry
Com_207_neg	2-Hydroxy-2-methylbutanedioic acid	C5H8O5	HMDB0000426	Organic compounds	Lipids and lipid-like molecules	Fatty Acyls	Fatty acids and conjugates	Hydroxy fatty acids	Food;Endogenous;Biological;Subcellular;Biofluid and excreta;Biological process;Nutrient;Energy storage;Energy source;Membrane stabilizer
Com_209_neg	dADP	C10H15N5O9P2	HMDB0001508	Organic compounds	Nucleosides, nucleotides, and analogues	Purine nucleotides	Purine deoxyribonucleotides	Purine 2'-deoxyribonucleoside diphosphates	Endogenous;Food;Biological;Cell and elements;Organ and components;Tissue and substructures;Subcellular;Biological process
Com_211_neg	dGTP	C10H16N5O13P3	HMDB0001440	Organic compounds	Nucleosides, nucleotides, and analogues	Purine nucleotides	Purine deoxyribonucleotides	Purine 2'-deoxyribonucleoside triphosphates	Endogenous;Food;Biological;Subcellular;Biological process;Pharmaceutical industry
Com_212_neg	3-Methylsalicylate	C8H8O3	HMDB0002390	Organic compounds	Benzenoids	Benzene and substituted derivatives	Benzoic acids and derivatives	Salicylic acids	-
Com_213_neg	Traumatic acid	C12H20O4	HMDB0000933	Organic compounds	Lipids and lipid-like molecules	Fatty Acyls	Fatty acids and conjugates	Medium-chain fatty acids	Endogenous;Food;Biological;Biofluid and excreta;Cell and elements;Subcellular;Biological process;Surfactant;Emulsifier;Membrane stabilizer;Energy source;Energy storage;Nutrient
Com_214_neg	2-Hydroxy-2-methylbutanoic acid	C5H10O3	HMDB0001987	Organic compounds	Lipids and lipid-like molecules	Fatty Acyls	Fatty acids and conjugates	Hydroxy fatty acids	Endogenous;Food;Biological;Biofluid and excreta;Cell and elements;Subcellular;Biological process;Surfactant;Emulsifier;Membrane stabilizer;Energy source;Energy storage;Nutrient
Com_216_neg	Quinic acid	C7H12O6	HMDB0003072	Organic compounds	Organic oxygen compounds	Organooxygen compounds	Alcohols and polyols	Quinic acids and derivatives	Food;Biological;Tissue and substructures;Organ and components;Subcellular;Biofluid and excreta;Biological process
Com_217_neg	Inositol	C6H12O6	HMDB0000211	Organic compounds	Organic oxygen compounds	Organooxygen compounds	Alcohols and polyols	Cyclohexanols	Endogenous;Food;Biological;Tissue and substructures;Subcellular;Organ and components;Biofluid and excreta;Cell and elements;Biological process;Pharmaceutical industry;Osmolyte;Molecular messenger
Com_218_neg	2,4-Dihydroxybenzoic Acid	C7H6O4	HMDB0029666	Organic compounds	Benzenoids	Benzene and substituted derivatives	Benzoic acids and derivatives	Hydroxybenzoic acid derivatives	Endogenous;Food;Biological;Biofluid and excreta;Subcellular;Cell and elements;Pharmaceutical industry
Com_219_neg	Linoleic acid	C18H32O2	HMDB0000673	Organic compounds	Lipids and lipid-like molecules	Fatty Acyls	Lineolic acids and derivatives	Lineolic acids and derivatives	Endogenous;Food;Exogenous;Synthetic;Biological;Organ and components;Tissue and substructures;Biofluid and excreta;Subcellular;Cell and elements;Biological process;Essential fatty acid;Membrane stabilizer;Energy source;Energy storage;Nutrient;Drug;Food and nutrition;Personal care products;Surfactant;Emulsifier
Com_220_neg	gamma-Linolenic acid	C18H30O2	HMDB0003073	Organic compounds	Lipids and lipid-like molecules	Fatty Acyls	Lineolic acids and derivatives	Lineolic acids and derivatives	Food;Biological;Tissue and substructures;Biofluid and excreta;Subcellular;Cell and elements;Biological process;Membrane stabilizer;Energy source;Energy storage;Nutrient;Drug;Surfactant;Emulsifier;Pharmaceutical industry
Com_221_neg	Trans,Trans-Muconic Acid	C6H6O4	HMDB0006331	Organic compounds	Lipids and lipid-like molecules	Fatty Acyls	Fatty acids and conjugates	Medium-chain fatty acids	Endogenous;Food;Biological;Biofluid and excreta;Cell and elements;Subcellular;Biological process;Surfactant;Emulsifier;Membrane stabilizer;Energy source;Energy storage;Nutrient
Com_222_neg	5-Hydroxyhexanoic Acid	C6H12O3	HMDB0000525	Organic compounds	Lipids and lipid-like molecules	Fatty Acyls	Fatty acids and conjugates	Medium-chain fatty acids	Endogenous;Food;Biological;Subcellular;Biofluid and excreta;Biological process;Nutrient;Energy storage;Energy source;Membrane stabilizer
Com_226_neg	Adenosine 5'-Diphosphate	C10H15N5O10P2	HMDB0001341	Organic compounds	Nucleosides, nucleotides, and analogues	Purine nucleotides	Purine ribonucleotides	Purine ribonucleoside diphosphates	Endogenous;Food;Biological;Tissue and substructures;Biofluid and excreta;Subcellular;Cell and elements;Biological process
Com_227_neg	8,15-Dihete	C20H32O4	HMDB0010219	Organic compounds	Lipids and lipid-like molecules	Fatty Acyls	Eicosanoids	Hydroxyeicosatetraenoic acids	Endogenous;Food;Biological;Subcellular;Biofluid and excreta;Biological process;Nutrient;Energy storage;Energy source;Membrane stabilizer;Molecular messenger
Com_230_neg	Guanidinoacetic acid	C3H7N3O2	HMDB0000128	Organic compounds	Organic acids and derivatives	Carboxylic acids and derivatives	Amino acids, peptides, and analogues	Alpha amino acids and derivatives	Endogenous;Tissue and substructures;Organ and components;Biofluid and excreta;Subcellular;Biological process;Metabolite;Pharmaceutical industry
Com_231_neg	D-Fructose 6-phosphate	C6H13O9P	HMDB0304311	Organic compounds	Organic oxygen compounds	Organooxygen compounds	Carbohydrates and carbohydrate conjugates	Hexose phosphates	-
Com_232_neg	5-oxoproline	C5H7NO3	HMDB0000267	Organic compounds	Organic acids and derivatives	Carboxylic acids and derivatives	Amino acids, peptides, and analogues	Alpha amino acids and derivatives	Endogenous;Food;Biological;Tissue and substructures;Organ and components;Biofluid and excreta;Subcellular;Biological process;Metabotoxin;Acidogen;Pharmaceutical industry;Essential amino acid
Com_233_neg	Deoxycytidine	C9H13N3O4	HMDB0000014	Organic compounds	Nucleosides, nucleotides, and analogues	Pyrimidine nucleosides	Pyrimidine 2'-deoxyribonucleosides	Pyrimidine 2'-deoxyribonucleosides	Endogenous;Food;Biological;Tissue and substructures;Biofluid and excreta;Cell and elements;Subcellular;Biological process;Pharmaceutical industry
Com_234_neg	UDP-D-glucose	C15H24N2O17P2	HMDB0000286	Organic compounds	Nucleosides, nucleotides, and analogues	Pyrimidine nucleotides	Pyrimidine nucleotide sugars	Pyrimidine nucleotide sugars	Endogenous;Food;Biological;Tissue and substructures;Organ and components;Biofluid and excreta;Subcellular;Biological process;Pharmaceutical industry
Com_237_neg	Tropolone	C7H6O2	HMDB0259299	Organic compounds	Hydrocarbon derivatives	Tropones	Tropolones	Tropolones	-
Com_238_neg	Bisphenol A	C15H16O2	HMDB0032133	Organic compounds	Benzenoids	Benzene and substituted derivatives	Diphenylmethanes	Bisphenols	Endogenous;Food;Synthetic;Subcellular;Biofluid and excreta;Air pollutant;Environmental contaminant;Pharmaceutical industry
Com_239_neg	Cyclohexaneacetic acid	C8H14O2	HMDB0031403	Organic compounds	Organic acids and derivatives	Carboxylic acids and derivatives	Carboxylic acids	Carboxylic acids	Endogenous;Food;Cell and elements;Subcellular;Biological process;Membrane stabilizer;Energy source;Energy storage;Surfactant;Emulsifier;Food and nutrition
Com_240_neg	4-Nitrophenol	C6H5NO3	HMDB0001232	Organic compounds	Benzenoids	Phenols	Nitrophenols	Nitrophenols	Endogenous;Synthetic;Environmental;Organ and components;Tissue and substructures;Biofluid and excreta;Subcellular;Cell and elements;Air pollutant;Environmental contaminant;Hazardous air pollutant;Water pollutant;Pharmaceutical industry
Com_242_neg	CDP	C9H15N3O11P2	HMDB0001546	Organic compounds	Nucleosides, nucleotides, and analogues	Pyrimidine nucleotides	Pyrimidine ribonucleotides	Pyrimidine ribonucleoside diphosphates	Endogenous;Food;Biological;Biofluid and excreta;Subcellular;Biological process;Pharmaceutical industry
Com_243_neg	N-Methylhydantoin	C4H6N2O2	HMDB0003646	Organic compounds	Organoheterocyclic compounds	Azolines	Imidazolines	Imidazolines	Endogenous
Com_244_neg	UDP-D-glucuronate	C15H22N2O18P2	HMDB0000935	Organic compounds	Organoheterocyclic compounds	Lactones	Gamma butyrolactones	Gamma butyrolactones	Endogenous;Food;Biological;Tissue and substructures;Organ and components;Subcellular;Biological process;Pharmaceutical industry
Com_245_neg	UDP-galactose	C15H22N2Na2O17P2	HMDB0012305	Organic compounds	Nucleosides, nucleotides, and analogues	Pyrimidine nucleotides	Pyrimidine nucleotide sugars	Pyrimidine nucleotide sugars	Endogenous;Food;Biological
Com_249_neg	2-Phosphoglyceric acid	C3H7O7P	HMDB0000362	Organic compounds	Organic oxygen compounds	Organooxygen compounds	Carbohydrates and carbohydrate conjugates	Sugar acids and derivatives	Endogenous
Com_250_neg	Citraconic acid	C5H6O4	HMDB0000634	Organic compounds	Lipids and lipid-like molecules	Fatty Acyls	Fatty acids and conjugates	Methyl-branched fatty acids	Endogenous;Food;Biofluid and excreta;Cell and elements;Subcellular;Biological process;Surfactant;Emulsifier;Pharmaceutical industry;Membrane stabilizer;Energy source;Energy storage;Nutrient
Com_251_neg	Citramalate	C5H8O5	HMDB0000426	Organic compounds	Lipids and lipid-like molecules	Fatty Acyls	Fatty acids and conjugates	Hydroxy fatty acids	Food;Endogenous;Biological;Subcellular;Biofluid and excreta;Biological process;Nutrient;Energy storage;Energy source;Membrane stabilizer
Com_252_neg	Cyclohexylsulfamate	C6H13NO3S	HMDB0031340	Organic compounds	Organic acids and derivatives	Sulfamic acid derivatives	Cyclamates	Cyclamates	Endogenous;Food;Subcellular;Cell and elements
Com_253_neg	Cytidine 3'-phosphate	C9H14N3O8P	HMDB0240312	Organic compounds	Organic oxygen compounds	Organooxygen compounds	Carbohydrates and carbohydrate conjugates	Pentose phosphates	-
Com_254_neg	D-Arabinose 5-phosphate	C5H11O8P	HMDB0011734	Organic compounds	Organic oxygen compounds	Organooxygen compounds	Carbohydrates and carbohydrate conjugates	Pentose phosphates	Endogenous;Food;Biological
Com_255_neg	L-Adrenaline	C9H13NO3	HMDB0000068	Organic compounds	Benzenoids	Phenols	Benzenediols	Catechols	Endogenous;Biological;Tissue and substructures;Organ and components;Biofluid and excreta;Subcellular;Cell and elements;Biological process;Pharmaceutical industry
Com_256_neg	Prostaglandin E2	C20H32O5	HMDB0001220	Organic compounds	Lipids and lipid-like molecules	Fatty Acyls	Eicosanoids	Prostaglandins and related compounds	Endogenous;Food;Biological;Tissue and substructures;Organ and components;Biofluid and excreta;Subcellular;Cell and elements;Biological process;Membrane stabilizer;Energy source;Energy storage;Nutrient;Inflammatory;Modulator;Surfactant;Emulsifier;Pharmaceutical industry
Com_257_neg	L-Ascorbate	C6H8O6	HMDB0000044	Organic compounds	Organoheterocyclic compounds	Dihydrofurans	Furanones	Butenolides	Food;Biological;Organ and components;Tissue and substructures;Biofluid and excreta;Subcellular;Cell and elements;Biological process;Essential vitamin;Antioxidant;Free radical scavenger;Vitamin;Nutrient;Drug;Dye
Com_258_neg	4-Amino-5-imidazolecarboxamide	C4H6N4O	HMDB0003192	Organic compounds	Organoheterocyclic compounds	Azoles	Imidazoles	Aminoimidazoles	Endogenous;Tissue and substructures;Cell and elements;Subcellular;Biofluid and excreta;Biological process
Com_259_neg	Xanthine	C5H4N4O2	HMDB0000292	Organic compounds	Organoheterocyclic compounds	Imidazopyrimidines	Purines and purine derivatives	Xanthines	Endogenous;Food;Biological;Cell and elements;Tissue and substructures;Organ and components;Biofluid and excreta;Subcellular;Biological process;Pharmaceutical industry;Drug metabolite;Waste product;Metabolite
Com_260_neg	4-Hydroxybenzoic acid	C7H6O3	HMDB0000500	Organic compounds	Benzenoids	Benzene and substituted derivatives	Benzoic acids and derivatives	Hydroxybenzoic acid derivatives	Endogenous;Food;Biological;Biofluid and excreta;Subcellular;Biological process;Cosmetic;Drug;Pharmaceutical industry
Com_261_neg	Deoxyinosine	C10H12N4O4	HMDB0000071	Organic compounds	Nucleosides, nucleotides, and analogues	Purine nucleosides	Purine 2'-deoxyribonucleosides	Purine 2'-deoxyribonucleosides	Endogenous;Food;Biological;Tissue and substructures;Biofluid and excreta;Subcellular;Cell and elements;Biological process;Pharmaceutical industry
Com_262_neg	Indoxylsulfuric acid	C8H7NO4S	HMDB0000682	Organic compounds	Organic acids and derivatives	Organic sulfuric acids and derivatives	Arylsulfates	Arylsulfates	Endogenous;Biological;Organ and components;Tissue and substructures;Subcellular;Biofluid and excreta;Metabolite;Pharmaceutical industry
Com_263_neg	Glutaric Acid	C5H8O4	HMDB0000661	Organic compounds	Organic acids and derivatives	Carboxylic acids and derivatives	Dicarboxylic acids and derivatives	Dicarboxylic acids and derivatives	Endogenous;Food;Biological;Tissue and substructures;Organ and components;Subcellular;Biofluid and excreta;Acidogen;Metabotoxin;Pharmaceutical industry
Com_265_neg	N-lactoyl-phenylalanine	C12H15NO4	HMDB0062175	Organic compounds	Organic acids and derivatives	Carboxylic acids and derivatives	Amino acids, peptides, and analogues	Phenylalanine and derivatives	-
Com_266_neg	Orotidine	C10H12N2O8	HMDB0000788	Organic compounds	Nucleosides, nucleotides, and analogues	Pyrimidine nucleosides	-	Pyrimidine nucleosides	Endogenous;Food;Biological;Tissue and substructures;Subcellular;Biofluid and excreta
Com_267_neg	NADH	C21H29N7O14P2	HMDB0001487	Organic compounds	Nucleosides, nucleotides, and analogues	(5'->5')-dinucleotides	-	(5'->5')-dinucleotides	Endogenous;Food;Biological;Tissue and substructures;Organ and components;Cell and elements;Biofluid and excreta;Subcellular;Biological process;Pharmaceutical industry
Com_268_neg	Chenodeoxycholic acid	C24H40O4	HMDB0000518	Organic compounds	Lipids and lipid-like molecules	Steroids and steroid derivatives	Bile acids, alcohols and derivatives	Dihydroxy bile acids, alcohols and derivatives	Endogenous;Food;Tissue and substructures;Subcellular;Organ and components;Cell and elements;Biofluid and excreta;Biological process;Surfactant;Emulsifier;Pharmaceutical industry;Membrane stabilizer;Energy source;Energy storage;Molecular messenger
Com_269_neg	Deoxycholic acid	C24H40O4	HMDB0000626	Organic compounds	Lipids and lipid-like molecules	Steroids and steroid derivatives	Bile acids, alcohols and derivatives	Dihydroxy bile acids, alcohols and derivatives	Endogenous;Food;Tissue and substructures;Subcellular;Organ and components;Cell and elements;Biofluid and excreta;Biological process;Hepatotoxin;Metabotoxin;Food and nutrition;Surfactant;Emulsifier;Pharmaceutical industry;Membrane stabilizer;Energy source;Energy storage;Oncometabolite;Molecular messenger
Com_270_neg	lithocholic acid	C24H40O3	HMDB0000761	Organic compounds	Lipids and lipid-like molecules	Steroids and steroid derivatives	Bile acids, alcohols and derivatives	Monohydroxy bile acids, alcohols and derivatives	Endogenous;Food;Biological;Cell and elements;Tissue and substructures;Subcellular;Biofluid and excreta;Organ and components;Biological process;Surfactant;Emulsifier;Membrane stabilizer;Energy source;Energy storage;Oncometabolite;Molecular messenger
Com_271_neg	Cholic acid	C24H40O5	HMDB0000619	Organic compounds	Lipids and lipid-like molecules	Steroids and steroid derivatives	Bile acids, alcohols and derivatives	Trihydroxy bile acids, alcohols and derivatives	Endogenous;Food;Subcellular;Cell and elements;Organ and components;Biofluid and excreta;Tissue and substructures;Biological process;Hepatotoxin;Metabotoxin;Food and nutrition;Surfactant;Emulsifier;Pharmaceutical industry;Metabolite;Membrane stabilizer;Energy source;Energy storage;Molecular messenger
Com_273_neg	Myristic acid	C14H28O2	HMDB0000806	Organic compounds	Lipids and lipid-like molecules	Fatty Acyls	Fatty acids and conjugates	Long-chain fatty acids	Endogenous;Food;Biological;Tissue and substructures;Organ and components;Biofluid and excreta;Subcellular;Cell and elements;Biological process;Membrane stabilizer;Energy source;Energy storage;Nutrient;Food and nutrition;Surfactant;Emulsifier;Pharmaceutical industry
Com_274_neg	gamma-Glutamylcysteine	C8H14N2O5S	HMDB0001049	Organic compounds	Organic acids and derivatives	Carboxylic acids and derivatives	Amino acids, peptides, and analogues	N-acyl-alpha amino acids	Endogenous;Food;Biological;Tissue and substructures;Organ and components;Cell and elements;Biofluid and excreta;Subcellular;Biological process;Pharmaceutical industry
Com_275_neg	Sorbitol	C6H14O6	HMDB0000247	Organic compounds	Organic oxygen compounds	Organooxygen compounds	Carbohydrates and carbohydrate conjugates	Sugar alcohols	Endogenous;Food;Biological;Organ and components;Tissue and substructures;Biofluid and excreta;Cell and elements;Subcellular;Biological process;Membrane stabilizer;Energy source;Energy storage;Surfactant;Emulsifier;Pharmaceutical industry
Com_276_neg	Taurodeoxycholic acid sodium salt	C26H44NNaO6S	HMDB0000896	Organic compounds	Lipids and lipid-like molecules	Steroids and steroid derivatives	Bile acids, alcohols and derivatives	Taurinated bile acids and derivatives	Endogenous;Food;Biological;Cell and elements;Tissue and substructures;Subcellular;Biofluid and excreta;Organ and components;Biological process;Membrane stabilizer;Energy source;Energy storage;Molecular messenger;Surfactant;Emulsifier
Com_278_neg	L-SelenoMethionine	C5H11NO2Se	HMDB0003966	Organic compounds	Organic acids and derivatives	Carboxylic acids and derivatives	Amino acids, peptides, and analogues	L-alpha-amino acids	Endogenous;Food;Biological;Organ and components;Cell and elements;Subcellular;Biofluid and excreta;Biological process
Com_280_neg	Ala-Gln	C8H15N3O4	HMDB0248109	Organic compounds	Organic acids and derivatives	Carboxylic acids and derivatives	Amino acids, peptides, and analogues	Dipeptides	-
Com_282_neg	(S)-Leucic acid	C6H12O3	HMDB0000746	Organic compounds	Lipids and lipid-like molecules	Fatty Acyls	Fatty acids and conjugates	Hydroxy fatty acids	Endogenous;Food;Biological;Biofluid and excreta;Cell and elements;Subcellular;Biological process;Surfactant;Emulsifier;Membrane stabilizer;Energy source;Energy storage;Nutrient
Com_283_neg	Lactose	C12H22O11	HMDB0041627	Organic compounds	Organic oxygen compounds	Organooxygen compounds	Carbohydrates and carbohydrate conjugates	O-glycosyl compounds	Food;Subcellular;Cell and elements;Nutrient
Com_284_neg	3-Hydroxyisovalerate	C5H10O3	HMDB0000754	Organic compounds	Lipids and lipid-like molecules	Fatty Acyls	Fatty acids and conjugates	Hydroxy fatty acids	Endogenous;Food;Biological;Tissue and substructures;Cell and elements;Subcellular;Biofluid and excreta;Biological process;Acidogen;Metabotoxin;Metabolite;Nutrient;Energy storage;Energy source;Membrane stabilizer
Com_285_neg	5-Hydroxymethyluracil	C5H6N2O3	HMDB0000469	Organic compounds	Organoheterocyclic compounds	Diazines	Pyrimidines and pyrimidine derivatives	Pyrimidones	Endogenous;Subcellular;Biofluid and excreta
Com_287_neg	N-Acetylalanine	C5H9NO3	HMDB0255053	Organic compounds	Organic acids and derivatives	Carboxylic acids and derivatives	Amino acids, peptides, and analogues	N-acyl-alpha amino acids	-
Com_292_neg	Hydroxypyruvic acid	C3H4O4	HMDB0001352	Organic compounds	Organic acids and derivatives	Hydroxy acids and derivatives	Beta hydroxy acids and derivatives	Beta hydroxy acids and derivatives	Endogenous;Food;Biological;Biofluid and excreta;Subcellular;Biological process;Pharmaceutical industry
Com_293_neg	IDP	C10H13N4O15P3	HMDB0003335	Organic compounds	Nucleosides, nucleotides, and analogues	Purine nucleotides	Purine ribonucleotides	Purine ribonucleoside diphosphates	Endogenous;Cell and elements;Subcellular;Biological process
Com_294_neg	alpha-D-Galactose 1-phosphate	C6H13O9P	HMDB0000645	Organic compounds	Organic oxygen compounds	Organooxygen compounds	Carbohydrates and carbohydrate conjugates	Monosaccharide phosphates	Endogenous;Food;Biological;Tissue and substructures;Cell and elements;Biofluid and excreta;Subcellular;Biological process;Pharmaceutical industry
Com_295_neg	Gamma-Glu-Leu	C11H20N2O5	HMDB0011171	Organic compounds	Organic acids and derivatives	Carboxylic acids and derivatives	Amino acids, peptides, and analogues	Dipeptides	Endogenous;Food;Biological
Com_296_neg	N-Acetyl-D-glucosamine 6-phosphate	C8H16NO9P	HMDB0001062	Organic compounds	Organic oxygen compounds	Organooxygen compounds	Carbohydrates and carbohydrate conjugates	Acylaminosugars	Endogenous;Biofluid and excreta;Subcellular;Biological process;Pharmaceutical industry
Com_297_neg	Glycerol-3-phosphate	C3H9O6P	HMDB0252849	Organic compounds	Lipids and lipid-like molecules	Glycerophospholipids	Glycerophosphates	Glycerophosphates	-
Com_309_pos	Isovalerylcarnitine	C12H23NO4	HMDB0000688	Organic compounds	Lipids and lipid-like molecules	Fatty Acyls	Fatty acid esters	Acyl carnitines	Endogenous;Food;Biological;Tissue and substructures;Biofluid and excreta;Cell and elements;Subcellular;Biological process;Surfactant;Emulsifier;Membrane stabilizer;Energy source;Energy storage;Nutrient
Com_311_pos	Arachidonoylcarnitine	C27H46NO4	HMDB0006455	Organic compounds	Lipids and lipid-like molecules	Fatty Acyls	Fatty acid esters	Acyl carnitines	Endogenous;Food;Biological;Biofluid and excreta;Subcellular;Cell and elements;Biological process;Surfactant;Emulsifier;Membrane stabilizer;Energy source;Energy storage;Nutrient
Com_314_pos	Cycloleucine	C6H11NO2	HMDB0062225	Organic compounds	Organic acids and derivatives	Carboxylic acids and derivatives	Amino acids, peptides, and analogues	L-alpha-amino acids	-
Com_315_pos	cis-gondoic acid	C20H38O2	HMDB0033022	Organic compounds	Lipids and lipid-like molecules	Fatty Acyls	Fatty acids and conjugates	Long-chain fatty acids	Endogenous;Food;Biological;Biological process;Surfactant;Emulsifier;Nutrient;Membrane stabilizer;Energy source;Energy storage
Com_316_pos	Pantethine	C22H42N4O8S2	HMDB0003828	Organic compounds	Organic acids and derivatives	Carboxylic acids and derivatives	Amino acids, peptides, and analogues	Beta amino acids and derivatives	Endogenous;Pharmaceutical industry
Com_318_pos	Glu-Glu	C10H16N2O7	HMDB0028818	Organic compounds	Organic acids and derivatives	Carboxylic acids and derivatives	Amino acids, peptides, and analogues	Dipeptides	Endogenous
Com_319_pos	Ectoine	C6H10N2O2	HMDB0240650	Organic compounds	Organic acids and derivatives	Carboxylic acids and derivatives	Amino acids, peptides, and analogues	L-alpha-amino acids	-
Com_320_pos	Cadaverine	C5H14N2	HMDB0002322	Organic compounds	Organic nitrogen compounds	Organonitrogen compounds	Amines	Monoalkylamines	Endogenous;Food;Biological;Tissue and substructures;Organ and components;Subcellular;Biofluid and excreta;Pharmaceutical industry
Com_321_pos	N-Acetylneuraminic acid	C11H19NO9	HMDB0000230	Organic compounds	Organic oxygen compounds	Organooxygen compounds	Carbohydrates and carbohydrate conjugates	N-acylneuraminic acids	Endogenous;Food;Biological;Tissue and substructures;Organ and components;Biofluid and excreta;Subcellular;Biological process;Antioxidant;Pharmaceutical industry
Com_322_pos	Palmitoylethanolamide	C18H37NO2	HMDB0002100	Organic compounds	Organic acids and derivatives	Carboximidic acids and derivatives	Carboximidic acids	Carboximidic acids	Endogenous;Food;Biological;Tissue and substructures;Biofluid and excreta;Cell and elements;Subcellular;Biological process;Surfactant;Emulsifier;Membrane stabilizer;Energy source;Energy storage
Com_324_pos	Uracil	C4H4N2O2	HMDB0000300	Organic compounds	Organoheterocyclic compounds	Diazines	Pyrimidines and pyrimidine derivatives	Pyrimidones	Endogenous;Food;Biological;Tissue and substructures;Organ and components;Biofluid and excreta;Cell and elements;Biological process;Prodrug;Pharmaceutical industry
Com_325_pos	Estradiol Benzoate	C25H28O3	HMDB0251961	Organic compounds	Lipids and lipid-like molecules	Steroids and steroid derivatives	Estrane steroids	Estrane steroids	-
Com_326_pos	L-Tryptophan	C11H12N2O2	HMDB0000929	Organic compounds	Organoheterocyclic compounds	Indoles and derivatives	Indolyl carboxylic acids and derivatives	Indolyl carboxylic acids and derivatives	Food;Synthetic;Biological;Tissue and substructures;Subcellular;Organ and components;Biofluid and excreta;Cell and elements;Biological process;Neurotoxin;Metabotoxin;Drug;Personal care products;Food and nutrition;Pharmaceutical industry;Essential amino acid;Trace element
Com_327_pos	Erucamide	C22H43NO	HMDB0244507	Organic compounds	Lipids and lipid-like molecules	Fatty Acyls	Fatty amides	Fatty amides	-
Com_328_pos	Hexadecanamide	C16H33NO	HMDB0012273	Organic compounds	Lipids and lipid-like molecules	Fatty Acyls	Fatty amides	Fatty amides	Endogenous;Food;Biological;Biofluid and excreta;Cell and elements;Subcellular;Biological process;Surfactant;Emulsifier;Membrane stabilizer;Energy source;Energy storage;Nutrient
Com_330_pos	2-Aminoethylphosphonate	C2H8NO3P	HMDB0011747	Organic compounds	Organic acids and derivatives	Organic phosphonic acids and derivatives	Organic phosphonic acids	Organic phosphonic acids	Endogenous
Com_331_pos	6-Methylmercaptopurine	C6H6N4S	HMDB0060412	Organic compounds	Organoheterocyclic compounds	Imidazopyrimidines	Purines and purine derivatives	6-thiopurines	Endogenous;Biofluid and excreta;Organ and components;Biological process;Drug metabolite;Waste product
Com_332_pos	2-Hydroxycinnamate	C9H8O3	HMDB0002641	Organic compounds	Phenylpropanoids and polyketides	Cinnamic acids and derivatives	Hydroxycinnamic acids and derivatives	Hydroxycinnamic acids	Endogenous;Food;Biological;Pharmaceutical industry
Com_333_pos	Piperidine	C5H11N	HMDB0034301	Organic compounds	Organoheterocyclic compounds	Piperidines	-	Piperidines	Food;Biological;Biofluid and excreta;Subcellular;Cell and elements;Food and nutrition;Laboratory chemical;Nutrient
Com_334_pos	Isoquinoline	C9H7N	HMDB0034244	Organic compounds	Organoheterocyclic compounds	Isoquinolines and derivatives	-	Isoquinolines and derivatives	Food;Subcellular;Cell and elements;Drug;Pharmaceutical industry;Nutrient
Com_335_pos	Purine	C5H4N4	HMDB0001366	Organic compounds	Organoheterocyclic compounds	Imidazopyrimidines	Purines and purine derivatives	Purines and purine derivatives	Endogenous;Food;Biological;Organ and components;Cell and elements;Tissue and substructures;Subcellular;Biofluid and excreta
Com_336_pos	S-Methyl-5'-thioadenosine	C11H15N5O3S	HMDB0001173	Organic compounds	Nucleosides, nucleotides, and analogues	5'-deoxyribonucleosides	5'-deoxy-5'-thionucleosides	5'-deoxy-5'-thionucleosides	Endogenous;Food;Biological;Tissue and substructures;Organ and components;Cell and elements;Biofluid and excreta;Subcellular;Biological process;Pharmaceutical industry
Com_337_pos	Isobutyrylglycine	C6H11NO3	HMDB0000730	Organic compounds	Organic acids and derivatives	Carboxylic acids and derivatives	Amino acids, peptides, and analogues	N-acyl-alpha amino acids	Endogenous;Biofluid and excreta;Subcellular;Biological process;Metabolite
Com_339_pos	Fexofenadine	C32H39NO4	HMDB0005030	Organic compounds	Benzenoids	Benzene and substituted derivatives	Diphenylmethanes	Diphenylmethanes	Endogenous;Organ and components;Biofluid and excreta;Subcellular;Biological process;Drug;Pharmaceutical industry;Drug metabolite;Waste product
Com_340_pos	Feruloylcholine	C15H22NO4	HMDB0032800	Organic compounds	Phenylpropanoids and polyketides	Cinnamic acids and derivatives	Hydroxycinnamic acids and derivatives	Coumaric acids and derivatives	Food;Biological;Subcellular;Cell and elements;Nutrient
Com_341_pos	Gly-Phe	C11H14N2O3	HMDB0028848	Organic compounds	Organic acids and derivatives	Carboxylic acids and derivatives	Amino acids, peptides, and analogues	Dipeptides	Endogenous
Com_342_pos	Glycerol 1-hexadecanoate	C19H38O4	HMDB0011564	Organic compounds	Lipids and lipid-like molecules	Glycerolipids	Monoradylglycerols	1-monoacylglycerols	Endogenous;Food;Biological;Biofluid and excreta;Tissue and substructures;Cell and elements;Subcellular;Biological process;Emulsifier;Surfactant;Energy source;Membrane stabilizer;Energy storage
Com_343_pos	gamma-Muurolene	C15H24	HMDB0038206	Organic compounds	Lipids and lipid-like molecules	Prenol lipids	Sesquiterpenoids	Sesquiterpenoids	Endogenous;Food;Biological;Cell and elements;Subcellular;Biofluid and excreta;Biological process;Surfactant;Emulsifier;Nutrient;Membrane stabilizer;Energy source;Energy storage
Com_344_pos	Galactinol	C12H22O11	HMDB0005826	Organic compounds	Organic oxygen compounds	Organooxygen compounds	Carbohydrates and carbohydrate conjugates	O-glycosyl compounds	Endogenous;Food;Biological;Biological process
Com_345_pos	Flavin Adenine Dinucleotide	C27H33N9O15P2	HMDB0252293	Organic compounds	Nucleosides, nucleotides, and analogues	Flavin nucleotides	-	Flavin nucleotides	-
Com_347_pos	Oxidized glutathione	C20H32N6O12S2	HMDB0003337	Organic compounds	Organic acids and derivatives	Carboxylic acids and derivatives	Amino acids, peptides, and analogues	Peptides	Endogenous;Food;Biological;Organ and components;Tissue and substructures;Biofluid and excreta;Cell and elements;Subcellular;Biological process
Com_348_pos	7,8-Dihydrofolate	C19H21N7O6	HMDB0304237	Organic compounds	Organoheterocyclic compounds	Pteridines and derivatives	Pterins and derivatives	Dihydrofolic acids and derivatives	-
Com_350_pos	5-Aminopentanoate	C5H11NO2	HMDB0003355	Organic compounds	Organic acids and derivatives	Carboxylic acids and derivatives	Amino acids, peptides, and analogues	Delta amino acids and derivatives	Endogenous;Biological;Organ and components;Subcellular;Biofluid and excreta
Com_351_pos	5-Hydroxylysine	C6H15ClN2O3	HMDB0000450	Organic compounds	Organic acids and derivatives	Carboxylic acids and derivatives	Amino acids, peptides, and analogues	L-alpha-amino acids	Endogenous;Food;Biological;Tissue and substructures;Subcellular;Biofluid and excreta
Com_352_pos	5-Methoxyindole-3-acetic acid	C11H11NO3	HMDB0004096	Organic compounds	Organoheterocyclic compounds	Indoles and derivatives	Indolyl carboxylic acids and derivatives	Indole-3-acetic acid derivatives	Endogenous;Biofluid and excreta;Subcellular;Biological process
Com_353_pos	Pyridoxamine	C8H12N2O2	HMDB0001431	Organic compounds	Organoheterocyclic compounds	Pyridines and derivatives	Pyridoxamines	Pyridoxamine 5'-phosphates	Endogenous;Food;Biological;Tissue and substructures;Organ and components;Biofluid and excreta;Cell and elements;Biological process;Pharmaceutical industry
Com_354_pos	5beta-Androstan-17beta-ol-3-one	C19H30O2	HMDB0006770	Organic compounds	Lipids and lipid-like molecules	Steroids and steroid derivatives	Androstane steroids	Androgens and derivatives	Endogenous;Food;Cell and elements;Tissue and substructures;Biofluid and excreta;Subcellular;Biological process;Surfactant;Emulsifier;Pharmaceutical industry;Membrane stabilizer;Energy source;Energy storage;Molecular messenger
Com_355_pos	Etiocholanolone	C19H30O2	HMDB0000490	Organic compounds	Lipids and lipid-like molecules	Steroids and steroid derivatives	Androstane steroids	Androgens and derivatives	Endogenous;Food;Cell and elements;Tissue and substructures;Biofluid and excreta;Subcellular;Biological process;Membrane stabilizer;Energy source;Energy storage;Molecular messenger;Surfactant;Emulsifier;Pharmaceutical industry
Com_357_pos	Sarcosine	C3H7NO2	HMDB0000271	Organic compounds	Organic acids and derivatives	Carboxylic acids and derivatives	Amino acids, peptides, and analogues	Alpha amino acids	Endogenous;Organ and components;Tissue and substructures;Biofluid and excreta;Cell and elements;Subcellular;Biological process;Pharmaceutical industry
Com_358_pos	S-Adenosyl-methionine	C22H30N6O8S2	HMDB0001185	Organic compounds	Nucleosides, nucleotides, and analogues	5'-deoxyribonucleosides	5'-deoxy-5'-thionucleosides	5'-deoxy-5'-thionucleosides	Endogenous;Cell and elements;Tissue and substructures;Organ and components;Biofluid and excreta;Subcellular;Biological process;Pharmaceutical industry;Food and nutrition;Trace element
Com_359_pos	Vitamin B2	C17H20N4O6	HMDB0000244	Organic compounds	Organoheterocyclic compounds	Pteridines and derivatives	Alloxazines and isoalloxazines	Flavins	Food;Synthetic;Biological;Tissue and substructures;Subcellular;Organ and components;Cell and elements;Biofluid and excreta;Biological process;Drug;Food and nutrition;Personal care products;Pharmaceutical industry;Essential vitamin
Com_362_pos	Spermidine	C7H19N3	HMDB0001257	Organic compounds	Organic nitrogen compounds	Organonitrogen compounds	Amines	Dialkylamines	Endogenous;Food;Biological;Tissue and substructures;Cell and elements;Organ and components;Biofluid and excreta;Subcellular;Biological process;Pharmaceutical industry
Com_363_pos	5-Aminolevulinate	C5H9NO3	HMDB0001149	Organic compounds	Organic acids and derivatives	Carboxylic acids and derivatives	Amino acids, peptides, and analogues	Delta amino acids and derivatives	Endogenous;Food;Biological;Tissue and substructures;Cell and elements;Organ and components;Biofluid and excreta;Subcellular;Biological process;Prodrug;Pharmaceutical industry
Com_364_pos	5-Aminosalicylate	C7H7NO3	HMDB0014389	Organic compounds	Benzenoids	Benzene and substituted derivatives	Benzoic acids and derivatives	Aminobenzoic acids	Endogenous;Subcellular;Biofluid and excreta;Drug;Pharmaceutical industry;Drug metabolite;Waste product
Com_365_pos	N-(5-Aminopentyl)acetamide	C7H16N2O	HMDB0002284	Organic compounds	Organic acids and derivatives	Carboxylic acids and derivatives	Carboxylic acid derivatives	Acetamides	Endogenous;Biological
Com_369_pos	Dihydrouracil	C4H6N2O2	HMDB0000076	Organic compounds	Organoheterocyclic compounds	Diazines	Pyrimidines and pyrimidine derivatives	Pyrimidones	Endogenous;Food;Biological;Organ and components;Cell and elements;Biofluid and excreta;Subcellular;Biological process;Metabolite;Pharmaceutical industry
Com_370_pos	Imidazoleacetic acid	C5H6N2O2	HMDB0002024	Organic compounds	Organoheterocyclic compounds	Azoles	Imidazoles	Imidazolyl carboxylic acids and derivatives	Endogenous;Food;Biological;Tissue and substructures;Biofluid and excreta;Subcellular;Biological process;Metabolite
Com_371_pos	1D-chiro-Inositol	C6H12O6	HMDB0240209	Organic compounds	Organic oxygen compounds	Organooxygen compounds	Alcohols and polyols	Cyclohexanols	-
Com_372_pos	Isoproterenol	C11H17NO3	HMDB0015197	Organic compounds	Benzenoids	Phenols	Benzenediols	Catechols	-
Com_374_pos	L-Alanyl-L-leucine	C9H18N2O3	HMDB0251509	Organic compounds	Organic acids and derivatives	Carboxylic acids and derivatives	Amino acids, peptides, and analogues	Dipeptides	-
Com_378_pos	Adenine	C5H5N5	HMDB0000034	Organic compounds	Organoheterocyclic compounds	Imidazopyrimidines	Purines and purine derivatives	6-aminopurines	Endogenous;Food;Biological;Tissue and substructures;Organ and components;Biofluid and excreta;Subcellular;Cell and elements;Biological process;Metabolite;Pharmaceutical industry
Com_380_pos	11-Ketoetiocholanolone	C19H28O3	HMDB0006031	Organic compounds	Lipids and lipid-like molecules	Steroids and steroid derivatives	Androstane steroids	Androgens and derivatives	Endogenous;Food;Biological;Cell and elements;Tissue and substructures;Subcellular;Biofluid and excreta;Biological process;Membrane stabilizer;Energy source;Energy storage;Molecular messenger;Surfactant;Emulsifier
Com_382_pos	L-Homocitrulline	C7H15N3O3	HMDB0000679	Organic compounds	Organic acids and derivatives	Carboxylic acids and derivatives	Amino acids, peptides, and analogues	L-alpha-amino acids	Endogenous;Tissue and substructures;Subcellular;Biofluid and excreta
Com_383_pos	Glycyl-L-leucine	C8H16N2O3	HMDB0028929	Organic compounds	Organic acids and derivatives	Carboxylic acids and derivatives	Amino acids, peptides, and analogues	Dipeptides	Endogenous
Com_384_pos	5-Methylcytosine	C5H7N3O	HMDB0002894	Organic compounds	Organoheterocyclic compounds	Diazines	Pyrimidines and pyrimidine derivatives	Hydroxypyrimidines	Endogenous;Food;Biological;Cell and elements;Subcellular;Biological process
Com_385_pos	D-Proline	C5H9NO2	HMDB0003411	Organic compounds	Organic acids and derivatives	Carboxylic acids and derivatives	Amino acids, peptides, and analogues	Proline and derivatives	Endogenous;Biological;Biofluid and excreta;Cell and elements;Subcellular;Biological process;Pharmaceutical industry
Com_386_pos	L-Hydroxyproline	C5H9NO3	HMDB0000725	Organic compounds	Organic acids and derivatives	Carboxylic acids and derivatives	Amino acids, peptides, and analogues	Proline and derivatives	Endogenous;Food;Synthetic;Biological;Cell and elements;Organ and components;Tissue and substructures;Biofluid and excreta;Subcellular;Biological process;Metabolite;Nutrient;Food and nutrition;Personal care products;Pharmaceutical industry
Com_387_pos	Glycyl-L-valine	C7H14N2O3	HMDB0028854	Organic compounds	Organic acids and derivatives	Carboxylic acids and derivatives	Amino acids, peptides, and analogues	Dipeptides	Endogenous
Com_388_pos	N6-Acetyl-L-lysine	C8H16N2O3	HMDB0000206	Organic compounds	Organic acids and derivatives	Carboxylic acids and derivatives	Amino acids, peptides, and analogues	L-alpha-amino acids	Endogenous;Food;Biological;Tissue and substructures;Subcellular;Biofluid and excreta
Com_389_pos	N,N-Dimethylglycine	C4H9NO2	HMDB0000092	Organic compounds	Organic acids and derivatives	Carboxylic acids and derivatives	Amino acids, peptides, and analogues	Alpha amino acids	Endogenous;Biological;Tissue and substructures;Organ and components;Biofluid and excreta;Subcellular;Biological process;Pharmaceutical industry;Metabolite
Com_390_pos	Guanosine monophosphate	C10H14N5O8P	HMDB0001397	Organic compounds	Nucleosides, nucleotides, and analogues	Purine nucleotides	Purine ribonucleotides	Purine ribonucleoside monophosphates	Endogenous;Tissue and substructures;Organ and components;Biofluid and excreta;Cell and elements;Subcellular;Biological process;Pharmaceutical industry;Molecular messenger
Com_392_pos	5-Hydroxyindoleacetate	C10H9NO3	HMDB0000763	Organic compounds	Organoheterocyclic compounds	Indoles and derivatives	Indolyl carboxylic acids and derivatives	Indole-3-acetic acid derivatives	Endogenous;Food;Biological;Cell and elements;Organ and components;Biofluid and excreta;Subcellular;Biological process
Com_393_pos	D-Phenylalanine	C9H11NO2	HMDB0250791	Organic compounds	Organic acids and derivatives	Carboxylic acids and derivatives	Amino acids, peptides, and analogues	Phenylalanine and derivatives	-
Com_394_pos	Uridine	C9H12N2O6	HMDB0000296	Organic compounds	Nucleosides, nucleotides, and analogues	Pyrimidine nucleosides	-	Pyrimidine nucleosides	Endogenous;Food;Biological;Tissue and substructures;Biofluid and excreta;Cell and elements;Subcellular;Biological process;Pharmaceutical industry
Com_395_pos	Adenosine	C10H13N5O4	HMDB0000050	Organic compounds	Nucleosides, nucleotides, and analogues	Purine nucleosides	-	Purine nucleosides	Endogenous;Food;Synthetic;Biological;Tissue and substructures;Biofluid and excreta;Cell and elements;Subcellular;Biological process;Immunotoxin;Metabotoxin;Metabolite;Personal care products;Pharmaceutical industry
Com_396_pos	Cytidine	C9H13N3O5	HMDB0000089	Organic compounds	Nucleosides, nucleotides, and analogues	Pyrimidine nucleosides	-	Pyrimidine nucleosides	Endogenous;Food;Biological;Tissue and substructures;Organ and components;Biofluid and excreta;Cell and elements;Subcellular;Biological process;Pharmaceutical industry
Com_397_pos	SDMA	C8H18N4O2	HMDB0003334	Organic compounds	Organic acids and derivatives	Carboxylic acids and derivatives	Amino acids, peptides, and analogues	Arginine and derivatives	Endogenous;Food;Biological;Tissue and substructures;Biofluid and excreta;Organ and components;Pharmaceutical industry
Com_398_pos	Glutathione	C10H17N3O6S	HMDB0000125	Organic compounds	Organic acids and derivatives	Carboxylic acids and derivatives	Amino acids, peptides, and analogues	Peptides	Endogenous;Food;Synthetic;Biological;Tissue and substructures;Biofluid and excreta;Subcellular;Cell and elements;Biological process;Personal care products;Pharmaceutical industry;Drug metabolite;Waste product;Metabolite;Antioxidant
Com_400_pos	11beta-Hydroxytestosterone	C19H28O3	HMDB0012533	Organic compounds	Lipids and lipid-like molecules	Steroids and steroid derivatives	Androstane steroids	Androgens and derivatives	Endogenous;Food;Biological;Biological process;Surfactant;Emulsifier;Membrane stabilizer;Energy source;Energy storage;Molecular messenger
Com_402_pos	1,4-Dihydro-1-Methyl-4-Oxo-3-Pyridinecarboxamide	C7H8N2O2	HMDB0004194	Organic compounds	Organoheterocyclic compounds	Pyridines and derivatives	Pyridinecarboxylic acids and derivatives	Nicotinamides	Endogenous;Biofluid and excreta;Subcellular;Biological process;Metabolite
Com_403_pos	Nandrolone	C18H26O2	HMDB0002725	Organic compounds	Lipids and lipid-like molecules	Steroids and steroid derivatives	Estrane steroids	Estrogens and derivatives	Endogenous;Food;Cell and elements;Organ and components;Tissue and substructures;Subcellular;Biofluid and excreta;Biological process;Surfactant;Emulsifier;Pharmaceutical industry;Membrane stabilizer;Energy source;Energy storage;Molecular messenger
Com_404_pos	1-(4-Methoxyphenyl)-2-propanone	C10H12O2	HMDB0032891	Organic compounds	Benzenoids	Benzene and substituted derivatives	Phenylpropanes	Phenylpropanes	Food;Biological;Subcellular;Cell and elements;Nutrient
Com_406_pos	cAMP	C10H12N5O6P	HMDB0000058	Organic compounds	Nucleosides, nucleotides, and analogues	Purine nucleotides	Cyclic purine nucleotides	3',5'-cyclic purine nucleotides	Endogenous;Food;Biological;Tissue and substructures;Biofluid and excreta;Subcellular;Cell and elements;Biological process;Pharmaceutical industry;Molecular messenger
Com_411_pos	L-Octanoylcarnitine	C15H29NO4	HMDB0000791	Organic compounds	Lipids and lipid-like molecules	Fatty Acyls	Fatty acid esters	Acyl carnitines	Endogenous;Food;Biological;Tissue and substructures;Biofluid and excreta;Cell and elements;Subcellular;Biological process;Surfactant;Emulsifier;Membrane stabilizer;Energy source;Energy storage;Nutrient
Com_412_pos	Hexanoylcarnitine	C13H25NO4	HMDB0000756	Organic compounds	Lipids and lipid-like molecules	Fatty Acyls	Fatty acid esters	Acyl carnitines	Endogenous;Food;Biological;Tissue and substructures;Organ and components;Biofluid and excreta;Cell and elements;Subcellular;Biological process;Surfactant;Emulsifier;Membrane stabilizer;Energy source;Energy storage;Nutrient
Com_413_pos	D-Ala-D-Ala	C6H12N2O3	HMDB0244385	Organic compounds	Organic acids and derivatives	Carboxylic acids and derivatives	Amino acids, peptides, and analogues	Dipeptides	-
Com_416_pos	Carnosine	C9H14N4O3	HMDB0000033	Organic compounds	Organic acids and derivatives	Peptidomimetics	Hybrid peptides	Hybrid peptides	Endogenous;Food;Synthetic;Biological;Tissue and substructures;Cell and elements;Organ and components;Biofluid and excreta;Subcellular;Biological process;Antioxidant;Personal care products;Pharmaceutical industry
Com_417_pos	N-Acetyl-L-glutamic acid	C7H11NO5	HMDB0001138	Organic compounds	Organic acids and derivatives	Carboxylic acids and derivatives	Amino acids, peptides, and analogues	Glutamic acid and derivatives	Endogenous;Tissue and substructures;Organ and components;Subcellular;Biofluid and excreta;Biological process
Com_418_pos	N4-Acetylcytidine	C11H15N3O6	HMDB0005923	Organic compounds	Nucleosides, nucleotides, and analogues	Pyrimidine nucleosides	-	Pyrimidine nucleosides	Endogenous
Com_419_pos	Metanephrine	C10H15NO3	HMDB0004063	Organic compounds	Benzenoids	Phenols	Methoxyphenols	Methoxyphenols	Endogenous;Organ and components;Biofluid and excreta;Subcellular;Cell and elements;Biological process
Com_420_pos	Ethambutol	C10H24N2O2	HMDB0014474	Organic compounds	Organic nitrogen compounds	Organonitrogen compounds	Amines	1,2-aminoalcohols	-
Com_421_pos	Melamine	C3H6N6	HMDB0041922	Organic compounds	Organoheterocyclic compounds	Triazines	1,3,5-triazines	1,3,5-triazines	-
Com_422_pos	Tubercidin	C11H14N4O4	HMDB0259318	Organic compounds	Nucleosides, nucleotides, and analogues	Pyrrolopyrimidine nucleosides and nucleotides	-	Pyrrolopyrimidine nucleosides and nucleotides	-
Com_423_pos	1,4-Naphthoquinone	C10H6O2	HMDB0244221	Organic compounds	Benzenoids	Naphthalenes	Naphthoquinones	Naphthoquinones	-
Com_426_pos	1,4-Diaminobutane	C4H12N2	HMDB0001414	Organic compounds	Organic nitrogen compounds	Organonitrogen compounds	Amines	Monoalkylamines	Endogenous;Food;Biological;Cell and elements;Organ and components;Tissue and substructures;Subcellular;Biofluid and excreta;Biological process;Rna component
Com_427_pos	1,3-Dimethyluracil	C6H8N2O2	HMDB0002144	Organic compounds	Organoheterocyclic compounds	Diazines	Pyrimidines and pyrimidine derivatives	Pyrimidones	Endogenous
Com_428_pos	3-Ureidopropionate	C4H8N2O3	HMDB0000026	Organic compounds	Organic acids and derivatives	Organic carbonic acids and derivatives	Ureas	Ureas	Endogenous;Food;Biological;Tissue and substructures;Biofluid and excreta;Subcellular;Biological process;Metabolite
Com_429_pos	5-Methyluridine	C10H14N2O6	HMDB0000884	Organic compounds	Nucleosides, nucleotides, and analogues	Pyrimidine nucleosides	-	Pyrimidine nucleosides	Endogenous;Tissue and substructures;Subcellular;Biofluid and excreta
Com_431_pos	D-Glucosamine	C6H13NO5	HMDB0030091	Organic compounds	Organic oxygen compounds	Organooxygen compounds	Carbohydrates and carbohydrate conjugates	Hexoses	Endogenous;Food;Biological;Subcellular;Cell and elements
Com_432_pos	Pseudouridine	C9H12N2O6	HMDB0000767	Organic compounds	Nucleosides, nucleotides, and analogues	Nucleoside and nucleotide analogues	-	Nucleoside and nucleotide analogues	Endogenous;Food;Biological;Tissue and substructures;Subcellular;Biofluid and excreta
Com_433_pos	O-Acetyl-L-carnitine	C9H17lNO4	HMDB0240773	Organic compounds	Lipids and lipid-like molecules	Fatty Acyls	Fatty acid esters	Acyl carnitines	-
Com_434_pos	Thymine	C5H6N2O2	HMDB0000262	Organic compounds	Organoheterocyclic compounds	Diazines	Pyrimidines and pyrimidine derivatives	Hydroxypyrimidines	Endogenous;Food;Biological;Tissue and substructures;Organ and components;Biofluid and excreta;Cell and elements;Biological process;Metabolite;Pharmaceutical industry
Com_435_pos	XMP	C10H11N4O9P--	HMDB0001554	Organic compounds	Nucleosides, nucleotides, and analogues	Purine nucleotides	Purine ribonucleotides	Purine ribonucleoside monophosphates	Endogenous;Food;Biological;Subcellular;Biological process
Com_436_pos	Tyramine	C8H11NO	HMDB0000306	Organic compounds	Benzenoids	Benzene and substituted derivatives	Phenethylamines	Phenethylamines	Endogenous;Food;Biological;Organ and components;Cell and elements;Tissue and substructures;Biofluid and excreta;Subcellular;Biological process;Molecular messenger;Food and nutrition;Pharmaceutical industry
Com_437_pos	Dimethyl phthalate	C10H10O4	HMDB0251388	Organic compounds	Benzenoids	Benzene and substituted derivatives	Benzoic acids and derivatives	Benzoic acid esters	-
Com_438_pos	Dibutyl phthalate	C16H22O4	HMDB0033244	Organic compounds	Benzenoids	Benzene and substituted derivatives	Benzoic acids and derivatives	Benzoic acid esters	Food;Synthetic;Biological;Subcellular;Teratogen;Air pollutant;Environmental contaminant;Hazardous air pollutant;Cosmetic;Personal care products;Laboratory chemical;Pharmaceutical industry;Nutrient
Com_442_pos	Pantothenic acid	C9H17NO5	HMDB0000210	Organic compounds	Organic oxygen compounds	Organooxygen compounds	Alcohols and polyols	Secondary alcohols	Food;Tissue and substructures;Organ and components;Biofluid and excreta;Cell and elements;Subcellular;Biological process;Drug;Pharmaceutical industry;Essential vitamin
Com_444_pos	Ergosterol	C28H44O	HMDB0000878	Organic compounds	Lipids and lipid-like molecules	Steroids and steroid derivatives	Ergostane steroids	Ergosterols and derivatives	Endogenous;Food;Biological;Cell and elements;Tissue and substructures;Subcellular;Biofluid and excreta;Biological process;Membrane stabilizer;Energy source;Energy storage;Molecular messenger;Surfactant;Emulsifier
Com_445_pos	Ergothioneine	C9H15N3O2S	HMDB0003045	Organic compounds	Organic acids and derivatives	Carboxylic acids and derivatives	Amino acids, peptides, and analogues	Histidine and derivatives	Food;Biological;Tissue and substructures;Biofluid and excreta;Chelating agent
Com_447_pos	6-Aminohexanoate	C6H13NO2	HMDB0001901	Organic compounds	Lipids and lipid-like molecules	Fatty Acyls	Fatty acids and conjugates	Medium-chain fatty acids	Food;Organ and components;Biofluid and excreta;Cell and elements;Subcellular;Biological process;Membrane stabilizer;Energy source;Energy storage;Nutrient;Drug;Surfactant;Emulsifier;Pharmaceutical industry
Com_448_pos	3-Hydroxy-DL-kynurenine	C10H12N2O4	HMDB0000732	Organic compounds	Organic oxygen compounds	Organooxygen compounds	Carbonyl compounds	Alkyl-phenylketones	Endogenous;Organ and components;Subcellular;Biofluid and excreta
Com_449_pos	Thioguanine	C5H5N5S	HMDB0014496	Organic compounds	Organoheterocyclic compounds	Imidazopyrimidines	Purines and purine derivatives	Purinethiones	Endogenous;Organ and components;Biofluid and excreta;Subcellular;Biological process;Pharmaceutical industry;Drug metabolite;Waste product
Com_450_pos	L-Carnitine	C7H15NO3	HMDB0000062	Organic compounds	Organic nitrogen compounds	Organonitrogen compounds	Quaternary ammonium salts	Carnitines	Endogenous;Food;Synthetic;Biological;Organ and components;Tissue and substructures;Biofluid and excreta;Subcellular;Cell and elements;Biological process;Personal care products;Food and nutrition;Pharmaceutical industry;Essential amino acid;Vitamin
Com_451_pos	Inosine	C10H12N4O5	HMDB0000195	Organic compounds	Nucleosides, nucleotides, and analogues	Purine nucleosides	-	Purine nucleosides	Endogenous;Food;Biological;Organ and components;Tissue and substructures;Biofluid and excreta;Subcellular;Cell and elements;Biological process;Pharmaceutical industry;Drug metabolite;Waste product;Metabolite
Com_452_pos	Nicotinic Acid	C6H5NO2	HMDB0001488	Organic compounds	Organoheterocyclic compounds	Pyridines and derivatives	Pyridinecarboxylic acids and derivatives	Pyridinecarboxylic acids	Endogenous;Food;Synthetic;Biological;Tissue and substructures;Organ and components;Biofluid and excreta;Subcellular;Cell and elements;Biological process;Drug;Food and nutrition;Personal care products;Pharmaceutical industry;Essential vitamin;Metabolite
Com_453_pos	Nicotinamide	C6H6N2O	HMDB0001406	Organic compounds	Organoheterocyclic compounds	Pyridines and derivatives	Pyridinecarboxylic acids and derivatives	Nicotinamides	Endogenous;Food;Synthetic;Biological;Organ and components;Tissue and substructures;Biofluid and excreta;Cell and elements;Biological process;Metabolite;Antioxidant;Food and nutrition;Personal care products;Pharmaceutical industry
Com_454_pos	Triethyl phosphate	C6H15O4P	HMDB0259191	Organic compounds	Organic acids and derivatives	Organic phosphoric acids and derivatives	Phosphate esters	Trialkyl phosphates	-
Com_455_pos	Trimethyllysine	C9H21N2O2	HMDB0001325	Organic compounds	Organic acids and derivatives	Carboxylic acids and derivatives	Amino acids, peptides, and analogues	L-alpha-amino acids	Endogenous;Tissue and substructures;Organ and components;Biofluid and excreta;Subcellular;Biological process
Com_456_pos	Testosterone	C19H28O2	HMDB0000234	Organic compounds	Lipids and lipid-like molecules	Steroids and steroid derivatives	Androstane steroids	Androgens and derivatives	Endogenous;Food;Biological;Cell and elements;Tissue and substructures;Organ and components;Biofluid and excreta;Subcellular;Biological process;Membrane stabilizer;Energy source;Energy storage;Molecular messenger;Surfactant;Emulsifier;Pharmaceutical industry
Com_457_pos	Styrene	C8H8	HMDB0034240	Organic compounds	Benzenoids	Benzene and substituted derivatives	Styrenes	Styrenes	Food;Environmental;Biological;Subcellular;Biofluid and excreta;Mutagen;Food and nutrition;Air pollutant;Hazardous air pollutant;Nutrient
Com_458_pos	1-Methylhistidine	C7H11N3O2	HMDB0000001	Organic compounds	Organic acids and derivatives	Carboxylic acids and derivatives	Amino acids, peptides, and analogues	Histidine and derivatives	Endogenous;Tissue and substructures;Biofluid and excreta;Subcellular;Biological process;Pharmaceutical industry
Com_459_pos	Furfural	C5H4O2	HMDB0032914	Organic compounds	Organic oxygen compounds	Organooxygen compounds	Carbonyl compounds	Aryl-aldehydes	Food;Biological;Biofluid and excreta;Subcellular;Cell and elements;Nutrient
Com_460_pos	Vidarabine	C10H13N5O4	HMDB0014340	Organic compounds	Nucleosides, nucleotides, and analogues	Purine nucleosides	-	Purine nucleosides	-
Com_461_pos	Isonicotinic acid	C6H5NO2	HMDB0060665	Organic compounds	Organoheterocyclic compounds	Pyridines and derivatives	Pyridinecarboxylic acids and derivatives	Pyridinecarboxylic acids	Endogenous;Biofluid and excreta;Organ and components;Drug metabolite;Waste product
Com_462_pos	2-Furoylglycine	C7H7NO4	HMDB0000439	Organic compounds	Organic acids and derivatives	Carboxylic acids and derivatives	Amino acids, peptides, and analogues	N-acyl-alpha amino acids	Endogenous;Biological;Subcellular;Biofluid and excreta
Com_463_pos	1-Methylxanthine	C6H6N4O2	HMDB0010738	Organic compounds	Organoheterocyclic compounds	Imidazopyrimidines	Purines and purine derivatives	Xanthines	Endogenous;Organ and components;Subcellular;Biofluid and excreta;Biological process;Drug metabolite;Waste product
Com_464_pos	Picolinic acid	C6H5NO2	HMDB0002243	Organic compounds	Organoheterocyclic compounds	Pyridines and derivatives	Pyridinecarboxylic acids and derivatives	Pyridinecarboxylic acids	Endogenous;Biofluid and excreta;Organ and components
Com_465_pos	Phthalate	C8H6O4	HMDB0002107	Organic compounds	Benzenoids	Benzene and substituted derivatives	Benzoic acids and derivatives	Benzoic acids	Food;Biological;Biofluid and excreta;Organ and components;Environmental contaminant;Pharmaceutical industry
Com_466_pos	L-allo-Threonine	C4H9NO3	HMDB0004041	Organic compounds	Organic acids and derivatives	Carboxylic acids and derivatives	Amino acids, peptides, and analogues	L-alpha-amino acids	Endogenous;Cell and elements;Tissue and substructures;Organ and components;Subcellular;Biofluid and excreta;Biological process
Com_467_pos	L-allo-Isoleucine	C6H13NO2	HMDB0000557	Organic compounds	Organic acids and derivatives	Carboxylic acids and derivatives	Amino acids, peptides, and analogues	Isoleucine and derivatives	Endogenous;Subcellular;Biofluid and excreta;Pharmaceutical industry
Com_468_pos	Asp-glu	C9H14N2O7	HMDB0028752	Organic compounds	Organic acids and derivatives	Carboxylic acids and derivatives	Amino acids, peptides, and analogues	Dipeptides	Endogenous
Com_470_pos	Allopurinol	C5H4N4O	HMDB0014581	Organic compounds	Organoheterocyclic compounds	Pyrazolopyrimidines	Pyrazolo[3,4-d]pyrimidines	Pyrazolo[3,4-d]pyrimidines	-
Com_471_pos	aminoimidazole carboxamide ribonucleotide	C9H15N4O8P	HMDB0248904	Organic compounds	Nucleosides, nucleotides, and analogues	Imidazole ribonucleosides and ribonucleotides	1-ribosyl-imidazolecarboxamides	1-ribosyl-imidazolecarboxamides	-
Com_472_pos	2'-Hydroxy-5'-methylacetophenone	C9H10O2	HMDB0032592	Organic compounds	Organic oxygen compounds	Organooxygen compounds	Carbonyl compounds	Alkyl-phenylketones	Endogenous;Food;Biological;Subcellular;Cell and elements;Food and nutrition
Com_473_pos	2-Methylsuccinic Acid	C5H8O4	HMDB0001844	Organic compounds	Lipids and lipid-like molecules	Fatty Acyls	Fatty acids and conjugates	Methyl-branched fatty acids	Endogenous;Food;Biological;Subcellular;Biofluid and excreta;Biological process;Nutrient;Energy storage;Energy source;Membrane stabilizer
Com_474_pos	Noradrenaline	C8H11NO3	HMDB0000216	Organic compounds	Benzenoids	Phenols	Benzenediols	Catechols	Endogenous;Food;Biological;Subcellular;Organ and components;Tissue and substructures;Biofluid and excreta;Cell and elements;Biological process;Nutrient;Molecular messenger;Pharmaceutical industry
Com_475_pos	N-carbamoyl-L-aspartate	C5H8N2O5	HMDB0000828	Organic compounds	Organic acids and derivatives	Carboxylic acids and derivatives	Amino acids, peptides, and analogues	Aspartic acid and derivatives	Endogenous;Food;Biological;Organ and components;Subcellular;Biofluid and excreta;Biological process;Pharmaceutical industry
Com_476_pos	Pyridoxine	C8H11NO3	HMDB0000239	Organic compounds	Organoheterocyclic compounds	Pyridines and derivatives	Pyridoxines	Pyridoxines	Endogenous;Food;Synthetic;Biological;Organ and components;Biofluid and excreta;Cell and elements;Biological process;Food and nutrition;Personal care products;Pharmaceutical industry
Com_478_pos	Epinephrine bitartrate	C13H19NO9	HMDB0000068	Organic compounds	Benzenoids	Phenols	Benzenediols	Catechols	Endogenous;Biological;Tissue and substructures;Organ and components;Biofluid and excreta;Subcellular;Cell and elements;Biological process;Pharmaceutical industry
Com_479_pos	L-Serine	C3H7NO3	HMDB0000187	Organic compounds	Organic acids and derivatives	Carboxylic acids and derivatives	Amino acids, peptides, and analogues	Serine and derivatives	Endogenous;Food;Synthetic;Biological;Tissue and substructures;Organ and components;Biofluid and excreta;Subcellular;Cell and elements;Biological process;Food and nutrition;Personal care products;Pharmaceutical industry
Com_480_pos	Hypoxanthine	C5H4N4O	HMDB0000157	Organic compounds	Organoheterocyclic compounds	Imidazopyrimidines	Purines and purine derivatives	Hypoxanthines	Endogenous;Food;Biological;Organ and components;Tissue and substructures;Biofluid and excreta;Subcellular;Cell and elements;Biological process;Pharmaceutical industry;Drug metabolite;Waste product;Metabolite
Com_481_pos	L-Glutamate	C5H9NO4	HMDB0060475	Organic compounds	Organic acids and derivatives	Carboxylic acids and derivatives	Amino acids, peptides, and analogues	Glutamic acid and derivatives	-
Com_482_pos	D-2-Aminobutyric acid	C4H9NO2	HMDB0000650	Organic compounds	Organic acids and derivatives	Carboxylic acids and derivatives	Amino acids, peptides, and analogues	D-alpha-amino acids	Endogenous;Food;Biological;Tissue and substructures;Subcellular;Biofluid and excreta
Com_483_pos	DL-Norvaline	C5H11NO2	HMDB0251527	Organic compounds	Organic acids and derivatives	Carboxylic acids and derivatives	Amino acids, peptides, and analogues	Alpha amino acids	-
Com_484_pos	Methionine	C5H11NO2S	HMDB0033951	Organic compounds	Organic acids and derivatives	Carboxylic acids and derivatives	Amino acids, peptides, and analogues	Methionine and derivatives	Food;Biological;Subcellular;Cell and elements;Food and nutrition;Nutrient
Com_485_pos	3-Aminoisobutyric acid	C4H9NO2	HMDB0003911	Organic compounds	Organic acids and derivatives	Carboxylic acids and derivatives	Amino acids, peptides, and analogues	Beta amino acids and derivatives	Endogenous;Tissue and substructures;Biofluid and excreta;Subcellular;Biological process;Metabolite
Com_486_pos	Anserine	C10H16N4O3	HMDB0000194	Organic compounds	Organic acids and derivatives	Peptidomimetics	Hybrid peptides	Hybrid peptides	Endogenous;Tissue and substructures;Organ and components;Biofluid and excreta;Subcellular;Biological process
Com_487_pos	(S)-2-Aminobutanoate	C4H9NO2	HMDB0000452	Organic compounds	Organic acids and derivatives	Carboxylic acids and derivatives	Amino acids, peptides, and analogues	L-alpha-amino acids	Endogenous;Food;Biological;Organ and components;Subcellular;Biofluid and excreta;Drug metabolite
Com_489_pos	1-Aminocyclopropane-1-carboxylic acid	C4H7NO2	HMDB0036458	Organic compounds	Organic acids and derivatives	Carboxylic acids and derivatives	Amino acids, peptides, and analogues	Alpha amino acids	Food;Biological;Subcellular;Cell and elements;Drug;Pharmaceutical industry;Nutrient
Com_490_pos	Levodopa	C9H11NO4	HMDB0000181	Organic compounds	Organic acids and derivatives	Carboxylic acids and derivatives	Amino acids, peptides, and analogues	Tyrosine and derivatives	Endogenous;Food;Environmental;Biological;Organ and components;Tissue and substructures;Biofluid and excreta;Subcellular;Cell and elements;Biological process;Neurotoxin;Environmental contaminant;Prodrug;Pharmaceutical industry
Com_491_pos	Betaine	C5H11NO2	HMDB0000043	Organic compounds	Organic acids and derivatives	Carboxylic acids and derivatives	Amino acids, peptides, and analogues	Alpha amino acids	Endogenous;Food;Biological;Tissue and substructures;Organ and components;Biofluid and excreta;Subcellular;Cell and elements;Biological process;Pharmaceutical industry;Osmolyte
Com_492_pos	Choline Hydroxide	C5H15NO2	HMDB0250194	Organic compounds	Organic acids and derivatives	Organic sulfuric acids and derivatives	Sulfuric acid esters	Sulfuric acid monoesters	-
Com_493_pos	Trimethylamine N-oxide	C3H9NO	HMDB0000925	Organic compounds	Organic nitrogen compounds	Organonitrogen compounds	Aminoxides	Trialkyl amine oxides	Endogenous;Biological;Tissue and substructures;Organ and components;Subcellular;Biofluid and excreta;Food and nutrition;Drug metabolite;Osmolyte;Waste product;Metabolite
Com_494_pos	S-Adenosyl-L-methionine	C15H22N6O5S	HMDB0001185	Organic compounds	Nucleosides, nucleotides, and analogues	5'-deoxyribonucleosides	5'-deoxy-5'-thionucleosides	5'-deoxy-5'-thionucleosides	Endogenous;Cell and elements;Tissue and substructures;Organ and components;Biofluid and excreta;Subcellular;Biological process;Pharmaceutical industry;Food and nutrition;Trace element
Com_495_pos	Pipecolic acid	C6H11NO2	HMDB0000070	Organic compounds	Organic acids and derivatives	Carboxylic acids and derivatives	Amino acids, peptides, and analogues	Alpha amino acids	Endogenous;Food;Biological;Tissue and substructures;Organ and components;Biofluid and excreta;Subcellular;Cell and elements
Com_496_pos	Azelaic acid	C9H16O4	HMDB0000784	Organic compounds	Lipids and lipid-like molecules	Fatty Acyls	Fatty acids and conjugates	Medium-chain fatty acids	Endogenous;Food;Synthetic;Biological;Subcellular;Biofluid and excreta;Organ and components;Biological process;Nutrient;Energy storage;Energy source;Membrane stabilizer;Personal care products;Pharmaceutical industry
Com_497_pos	gamma-Glutamylglutamic acid	C10H16N2O7	HMDB0011737	Organic compounds	Organic acids and derivatives	Carboxylic acids and derivatives	Amino acids, peptides, and analogues	Glutamic acid and derivatives	Endogenous
Com_498_pos	beta-Nicotinamide adenine dinucleotide phosphate	C21H29N7O17P3	HMDB0304435	Organic compounds	Nucleosides, nucleotides, and analogues	(5'->5')-dinucleotides	-	(5'->5')-dinucleotides	-
Com_499_pos	L-Pipecolate	C6H11NO2	HMDB0000716	Organic compounds	Organic acids and derivatives	Carboxylic acids and derivatives	Amino acids, peptides, and analogues	L-alpha-amino acids	Endogenous;Food;Biological;Organ and components;Biofluid and excreta;Subcellular;Biological process
Com_501_pos	UDP-N-acetylglucosamine	C17H27N3O17P2	HMDB0000290	Organic compounds	Nucleosides, nucleotides, and analogues	Pyrimidine nucleotides	Pyrimidine nucleotide sugars	Pyrimidine nucleotide sugars	Endogenous;Organ and components;Tissue and substructures;Subcellular;Biofluid and excreta;Biological process;Pharmaceutical industry
Com_502_pos	Choline Chloride	C5H14ClNO	HMDB0250194	Organic compounds	Organic acids and derivatives	Organic sulfuric acids and derivatives	Sulfuric acid esters	Sulfuric acid monoesters	-
Com_503_pos	1-Methylguanine	C6H7N5O	HMDB0003282	Organic compounds	Organoheterocyclic compounds	Imidazopyrimidines	Purines and purine derivatives	6-oxopurines	Endogenous;Food;Biological
Com_504_pos	Serotonin	C10H12N2O	HMDB0000259	Organic compounds	Organoheterocyclic compounds	Indoles and derivatives	Tryptamines and derivatives	Serotonins	Endogenous;Food;Biological;Organ and components;Tissue and substructures;Biofluid and excreta;Subcellular;Cell and elements;Biological process;Pharmaceutical industry
Com_505_pos	1-Palmitoyl-Sn-Glycero-3-Phosphocholine	C24H50NO7P	HMDB0010382	Organic compounds	Lipids and lipid-like molecules	Glycerophospholipids	Glycerophosphocholines	1-acyl-sn-glycero-3-phosphocholines	Endogenous;Food;Biological;Tissue and substructures;Biofluid and excreta;Cell and elements;Subcellular;Biological process;Surfactant;Emulsifier;Food and nutrition;Energy source;Membrane stabilizer;Energy storage
Com_507_pos	2-(3,4-dimethoxyphenyl)ethanamine	C10H15NO2	HMDB0041806	Organic compounds	Benzenoids	Benzene and substituted derivatives	Methoxybenzenes	Dimethoxybenzenes	Endogenous;Nutrient
Com_509_pos	1-Methylguanosine	C11H15N5O5	HMDB0001563	Organic compounds	Nucleosides, nucleotides, and analogues	Purine nucleosides	-	Purine nucleosides	Endogenous
Com_510_pos	1-Methylnicotinamide	C7H9N2O+	HMDB0000699	Organic compounds	Organoheterocyclic compounds	Pyridines and derivatives	Pyridinecarboxylic acids and derivatives	Nicotinamides	Endogenous;Tissue and substructures;Biofluid and excreta;Subcellular;Cell and elements;Biological process;Pharmaceutical industry
Com_511_pos	1-Methyluric acid	C6H6N4O3	HMDB0003099	Organic compounds	Organoheterocyclic compounds	Imidazopyrimidines	Purines and purine derivatives	Xanthines	Endogenous;Biological;Organ and components;Biofluid and excreta;Subcellular;Biological process;Drug metabolite;Waste product
Com_512_pos	1-Oleoyl-Sn-Glycero-3-Phosphocholine	C26H52NO7P	HMDB0002815	Organic compounds	Lipids and lipid-like molecules	Glycerophospholipids	Glycerophosphocholines	1-acyl-sn-glycero-3-phosphocholines	Endogenous;Food;Biological;Tissue and substructures;Biofluid and excreta;Cell and elements;Subcellular;Biological process;Surfactant;Emulsifier;Food and nutrition;Membrane stabilizer;Energy source;Energy storage
Com_516_pos	Dl-Norleucine	C6H13NO2	HMDB0251526	Organic compounds	Organic acids and derivatives	Carboxylic acids and derivatives	Amino acids, peptides, and analogues	Alpha amino acids	-
Com_518_pos	N-Acetylglycine	C4H7NO3	HMDB0000532	Organic compounds	Organic acids and derivatives	Carboxylic acids and derivatives	Amino acids, peptides, and analogues	N-acyl-alpha amino acids	Endogenous;Tissue and substructures;Subcellular;Biofluid and excreta;Pharmaceutical industry
Com_519_pos	N-Acetylhistamine	C7H11N3O	HMDB0013253	Organic compounds	Organic acids and derivatives	Carboxylic acids and derivatives	Carboxylic acid derivatives	N-acetyl-2-arylethylamines	Endogenous;Food;Biological;Pharmaceutical industry
Com_520_pos	N-Acetylthreonine	C6H11NO4	HMDB0062557	Organic compounds	Organic acids and derivatives	Carboxylic acids and derivatives	Amino acids, peptides, and analogues	N-acyl-L-alpha-amino acids	-
Com_522_pos	L-Lysinamide	C6H15N3O	HMDB0253898	Organic compounds	Organic acids and derivatives	Carboxylic acids and derivatives	Amino acids, peptides, and analogues	Alpha amino acid amides	-
Com_523_pos	Phosphoethanolamine	C2H8NO4P	HMDB0000224	Organic compounds	Organic acids and derivatives	Organic phosphoric acids and derivatives	Phosphate esters	Phosphoethanolamines	Endogenous;Food;Biological;Tissue and substructures;Biofluid and excreta;Subcellular;Biological process
Com_526_pos	Cyprodinil	C14H15N3	HMDB0034853	Organic compounds	Benzenoids	Benzene and substituted derivatives	Aniline and substituted anilines	Aniline and substituted anilines	Food;Synthetic;Nutrient;Environmental contaminant
Com_527_pos	N-Methyl-a-aminoisobutyric acid	C5H11NO2	HMDB0002141	Organic compounds	Organic acids and derivatives	Carboxylic acids and derivatives	Amino acids, peptides, and analogues	Alpha amino acids	Endogenous;Pharmaceutical industry
Com_528_pos	Niflumic Acid	C13H9F3N2O2	HMDB0015573	Organic compounds	Benzenoids	Benzene and substituted derivatives	Trifluoromethylbenzenes	Trifluoromethylbenzenes	-
Com_530_pos	Oxymetazoline	C16H24N2O	HMDB0015070	Organic compounds	Benzenoids	Benzene and substituted derivatives	Xylenes	Xylenols	-
Com_532_pos	19-Norethisterone	C20H26O2	HMDB0014855	Organic compounds	Lipids and lipid-like molecules	Steroids and steroid derivatives	Estrane steroids	Estrogens and derivatives	Food;Enteral;Cell and elements;Tissue and substructures;Subcellular;Biofluid and excreta;Biological process;Membrane stabilizer;Energy source;Energy storage;Molecular messenger;Drug;Surfactant;Emulsifier;Pharmaceutical industry
Com_535_pos	5,6-Dihydro-5-methyluracil	C5H8N2O2	HMDB0304210	Organic compounds	Organoheterocyclic compounds	Diazines	Pyrimidines and pyrimidine derivatives	Hydropyrimidines	-
Com_537_pos	Trigonelline	C7H7NO2	HMDB0000875	Organic compounds	Alkaloids and derivatives	-	-	Alkaloids and derivatives	Endogenous;Food;Biological;Tissue and substructures;Subcellular;Biofluid and excreta
Com_538_pos	2-Piperidinone	C5H9NO	HMDB0011749	Organic compounds	Organoheterocyclic compounds	Piperidines	Piperidinones	Piperidinones	Endogenous
Com_539_pos	Phloretate	C9H10O3	HMDB0002199	Organic compounds	Phenylpropanoids and polyketides	Phenylpropanoic acids	-	Phenylpropanoic acids	Endogenous;Food;Biological;Organ and components;Subcellular;Biofluid and excreta;Pharmaceutical industry;Drug metabolite;Waste product
Com_540_pos	Alpha-Linolenic acid	C18H30O2	HMDB0001388	Organic compounds	Lipids and lipid-like molecules	Fatty Acyls	Lineolic acids and derivatives	Lineolic acids and derivatives	Food;Exogenous;Synthetic;Biological;Organ and components;Tissue and substructures;Biofluid and excreta;Subcellular;Cell and elements;Biological process;Drug;Personal care products;Surfactant;Emulsifier;Pharmaceutical industry;Essential fatty acid;Membrane stabilizer;Energy source;Energy storage;Nutrient
Com_541_pos	3-Methylindole	C9H9N	HMDB0000466	Organic compounds	Organoheterocyclic compounds	Indoles and derivatives	Indoles	3-methylindoles	Endogenous;Food;Biological;Subcellular;Biofluid and excreta
Com_542_pos	isoleucine	C6H13NO2	HMDB0033923	Organic compounds	Organic acids and derivatives	Carboxylic acids and derivatives	Amino acids, peptides, and analogues	Isoleucine and derivatives	Food;Biofluid and excreta;Subcellular;Cell and elements;Food and nutrition;Nutrient
Com_543_pos	Creatinine	C4H7N3O	HMDB0000562	Organic compounds	Organic acids and derivatives	Carboxylic acids and derivatives	Amino acids, peptides, and analogues	Alpha amino acids and derivatives	Endogenous;Food;Synthetic;Biological;Organ and components;Cell and elements;Tissue and substructures;Subcellular;Biofluid and excreta;Metabolite;Personal care products;Pharmaceutical industry
Com_544_pos	L-Citrulline	C6H13N3O3	HMDB0000904	Organic compounds	Organic acids and derivatives	Carboxylic acids and derivatives	Amino acids, peptides, and analogues	L-alpha-amino acids	Endogenous;Food;Biological;Organ and components;Cell and elements;Tissue and substructures;Biofluid and excreta;Subcellular;Biological process;Metabolite;Trace element;Protective agent;Food and nutrition;Pharmaceutical industry
Com_545_pos	L-Leucine	C6H13NO2	HMDB0000687	Organic compounds	Organic acids and derivatives	Carboxylic acids and derivatives	Amino acids, peptides, and analogues	Leucine and derivatives	Food;Synthetic;Biological;Organ and components;Tissue and substructures;Biofluid and excreta;Cell and elements;Subcellular;Biological process;Drug;Food and nutrition;Personal care products;Pharmaceutical industry;Essential amino acid
Com_546_pos	Urocanic acid	C6H6N2O2	HMDB0000301	Organic compounds	Organoheterocyclic compounds	Azoles	Imidazoles	Imidazolyl carboxylic acids and derivatives	Endogenous;Food;Biological;Tissue and substructures;Cell and elements;Organ and components;Biofluid and excreta;Subcellular;Biological process;Nutrient;Pharmaceutical industry
Com_547_pos	D-Glutamine	C5H10N2O3	HMDB0003423	Organic compounds	Organic acids and derivatives	Carboxylic acids and derivatives	Amino acids, peptides, and analogues	D-alpha-amino acids	Endogenous;Subcellular;Biofluid and excreta;Pharmaceutical industry
Com_548_pos	L-Ornithine	C5H12N2O2	HMDB0000214	Organic compounds	Organic acids and derivatives	Carboxylic acids and derivatives	Amino acids, peptides, and analogues	L-alpha-amino acids	Endogenous;Food;Biological;Organ and components;Biofluid and excreta;Cell and elements;Subcellular;Biological process;Pharmaceutical industry
Com_551_pos	2-Hydroxy-6-Aminopurine	C5H5N5O	HMDB0000403	Organic compounds	Organoheterocyclic compounds	Imidazopyrimidines	Purines and purine derivatives	6-aminopurines	Endogenous;Subcellular;Biofluid and excreta
Com_553_pos	N6-Succinyl Adenosine	C14H17N5O8	HMDB0255303	Organic compounds	Organic acids and derivatives	Carboxylic acids and derivatives	Dicarboxylic acids and derivatives	Dicarboxylic acids and derivatives	-
Com_554_pos	N-Acetyl-L-histidine	C8H11N3O3	HMDB0032055	Organic compounds	Organic acids and derivatives	Carboxylic acids and derivatives	Amino acids, peptides, and analogues	Histidine and derivatives	Endogenous;Food;Biological;Tissue and substructures;Subcellular;Cell and elements
Com_555_pos	2-Phenylglycine	C8H9NO2	HMDB0002210	Organic compounds	Organic acids and derivatives	Carboxylic acids and derivatives	Amino acids, peptides, and analogues	Alpha amino acids	Endogenous;Subcellular;Biofluid and excreta
Com_556_pos	O-Acetyl-L-homoserine	C6H11NO4	HMDB0029423	Organic compounds	Organic acids and derivatives	Carboxylic acids and derivatives	Amino acids, peptides, and analogues	Alpha amino acids	Endogenous;Food;Biological;Subcellular;Cell and elements
Com_557_pos	NG,NG-Dimethyl-L-arginine	C8H20Cl2N4O2	HMDB0001539	Organic compounds	Organic acids and derivatives	Carboxylic acids and derivatives	Amino acids, peptides, and analogues	Arginine and derivatives	Endogenous;Food;Biological;Tissue and substructures;Organ and components;Subcellular;Biofluid and excreta;Pharmaceutical industry
Com_558_pos	Cytarabine	C9H13N3O5	HMDB0015122	Organic compounds	Nucleosides, nucleotides, and analogues	Pyrimidine nucleosides	-	Pyrimidine nucleosides	Endogenous;Food;Environmental;Biological;Subcellular;Biofluid and excreta;Environmental contaminant;Drug;Pharmaceutical industry
Com_559_pos	Cuminaldehyde	C10H12O	HMDB0002214	Organic compounds	Lipids and lipid-like molecules	Prenol lipids	Monoterpenoids	Aromatic monoterpenoids	Food;Endogenous;Biological;Cell and elements;Subcellular;Biofluid and excreta;Biological process;Membrane stabilizer;Energy source;Energy storage;Nutrient;Cosmetic;Surfactant;Emulsifier
Com_561_pos	2-Deoxy-D-galactose	C6H12O5	HMDB0012327	Organic compounds	Organic oxygen compounds	Organooxygen compounds	Carbohydrates and carbohydrate conjugates	Hexoses	Endogenous
Com_562_pos	dAMP	C10H14N5O6P	HMDB0000905	Organic compounds	Nucleosides, nucleotides, and analogues	Purine nucleotides	Purine deoxyribonucleotides	Purine 2'-deoxyribonucleoside monophosphates	Endogenous;Organ and components;Subcellular;Biological process
Com_563_pos	2-Methylbutyroylcarnitine	C12H23NO4	HMDB0000378	Organic compounds	Lipids and lipid-like molecules	Fatty Acyls	Fatty acid esters	Acyl carnitines	Endogenous;Food;Biological;Tissue and substructures;Biofluid and excreta;Cell and elements;Subcellular;Biological process;Surfactant;Emulsifier;Membrane stabilizer;Energy source;Energy storage;Nutrient
Com_565_pos	L-2-Aminoadipic acid	C6H11NO4	HMDB0302754	Organic compounds	Organic acids and derivatives	Carboxylic acids and derivatives	Amino acids, peptides, and analogues	Alpha amino acids	-
Com_567_pos	2-Aminooctanoic acid	C8H17NO2	HMDB0000991	Organic compounds	Organic acids and derivatives	Carboxylic acids and derivatives	Amino acids, peptides, and analogues	Alpha amino acids	Endogenous;Subcellular;Biofluid and excreta
Com_568_pos	Hypotaurine	C2H7NO2S	HMDB0000965	Organic compounds	Organic acids and derivatives	Sulfinic acids and derivatives	Sulfinic acids	Sulfinic acids	Endogenous;Tissue and substructures;Organ and components;Cell and elements;Biofluid and excreta;Subcellular;Biological process
Com_569_pos	2,6-Dimethylaniline	C8H11N	HMDB0060677	Organic compounds	Benzenoids	Benzene and substituted derivatives	Xylenes	m-Xylenes	Endogenous;Synthetic;Environmental;Organ and components;Subcellular;Biofluid and excreta;Biological process;Carcinogen;Air pollutant;Environmental contaminant;Drug metabolite;Waste product
Com_570_pos	2-(Formylamino)Benzoic Acid	C8H7NO3	HMDB0004089	Organic compounds	Benzenoids	Benzene and substituted derivatives	Benzoic acids and derivatives	Benzoic acids	Endogenous;Subcellular;Biological process
Com_572_pos	L-Cystathionine	C7H14N2O4S	HMDB0000099	Organic compounds	Organic acids and derivatives	Carboxylic acids and derivatives	Amino acids, peptides, and analogues	L-cysteine-S-conjugates	Endogenous;Food;Biological;Organ and components;Biofluid and excreta;Subcellular;Biological process;Drug metabolite;Waste product
Com_574_pos	Methionine sulfoxide	C5H11NO4S	HMDB0002005	Organic compounds	Organic acids and derivatives	Carboxylic acids and derivatives	Amino acids, peptides, and analogues	L-alpha-amino acids	Endogenous;Food;Biological;Tissue and substructures;Biofluid and excreta;Subcellular;Biological process
Com_575_pos	L-Saccharopine	C11H20N2O6	HMDB0000279	Organic compounds	Organic acids and derivatives	Carboxylic acids and derivatives	Amino acids, peptides, and analogues	Glutamic acid and derivatives	Endogenous;Food;Biological;Tissue and substructures;Biofluid and excreta;Subcellular;Biological process;Metabotoxin;Acidogen;Pharmaceutical industry
Com_576_pos	L-Methionine sulfone	C5H11NO4S	HMDB0062174	Organic compounds	Organic acids and derivatives	Carboxylic acids and derivatives	Amino acids, peptides, and analogues	L-alpha-amino acids	-
Com_577_pos	L-Tyrosine	C9H11NO3	HMDB0000158	Organic compounds	Organic acids and derivatives	Carboxylic acids and derivatives	Amino acids, peptides, and analogues	Tyrosine and derivatives	Endogenous;Food;Synthetic;Biological;Tissue and substructures;Organ and components;Biofluid and excreta;Subcellular;Cell and elements;Biological process;Trace element;Personal care products;Food and nutrition;Pharmaceutical industry
Com_578_pos	L-Canavanine	C5H12N4O3	HMDB0002706	Organic compounds	Organic acids and derivatives	Carboxylic acids and derivatives	Amino acids, peptides, and analogues	L-alpha-amino acids	Food;Biological;Subcellular;Pharmaceutical industry
Com_579_pos	L-Alanyl-L-Lysine	C9H19N3O3	HMDB0028692	Organic compounds	Organic acids and derivatives	Carboxylic acids and derivatives	Amino acids, peptides, and analogues	Dipeptides	Endogenous
Com_580_pos	Oleamide	C18H35NO	HMDB0002117	Organic compounds	Lipids and lipid-like molecules	Fatty Acyls	Fatty amides	Fatty amides	Endogenous;Food;Biological;Biofluid and excreta;Cell and elements;Subcellular;Biological process;Surfactant;Emulsifier;Membrane stabilizer;Energy source;Energy storage;Nutrient
Com_581_pos	Indole-3-acetamide	C10H10N2O	HMDB0029739	Organic compounds	Organoheterocyclic compounds	Indoles and derivatives	Indoles	3-alkylindoles	Endogenous;Food;Biological;Subcellular;Cell and elements;Pharmaceutical industry
Com_582_pos	Stachydrine	C7H13NO2	HMDB0004827	Organic compounds	Organic acids and derivatives	Carboxylic acids and derivatives	Amino acids, peptides, and analogues	Proline and derivatives	Endogenous;Food;Biological;Pharmaceutical industry;Osmolyte
Com_583_pos	2-Pyrrolidinone	C4H7NO	HMDB0002039	Organic compounds	Organoheterocyclic compounds	Pyrrolidines	Pyrrolidones	Pyrrolidine-2-ones	Endogenous;Food;Tissue and substructures;Organ and components;Subcellular;Biofluid and excreta
Com_584_pos	7,8-dihydro-L-Biopterin	C9H13N5O3	HMDB0247294	Organic compounds	Organoheterocyclic compounds	Pteridines and derivatives	Pterins and derivatives	Biopterins and derivatives	-
Com_585_pos	Acetylcarnitine	C9H17NO4	HMDB0240773	Organic compounds	Lipids and lipid-like molecules	Fatty Acyls	Fatty acid esters	Acyl carnitines	-
Com_587_pos	Adipamide	C6H12N2O2	HMDB0304762	Organic compounds	Lipids and lipid-like molecules	Fatty Acyls	Fatty amides	Fatty amides	-
Com_588_pos	Ala-gly	C5H10N2O3	HMDB0006899	Organic compounds	Organic acids and derivatives	Carboxylic acids and derivatives	Amino acids, peptides, and analogues	Dipeptides	Endogenous
Com_590_pos	S-adenosyl-L-methioninamine	C15H22N6O5S	HMDB0304476	Organic compounds	Nucleosides, nucleotides, and analogues	5'-deoxyribonucleosides	5'-deoxy-5'-thionucleosides	5'-deoxy-5'-thionucleosides	-
Com_592_pos	Protocatechualdehyde	C7H6O3	HMDB0059965	Organic compounds	Organic oxygen compounds	Organooxygen compounds	Carbonyl compounds	Hydroxybenzaldehydes	-
Com_593_pos	Spermine	C10H26N4	HMDB0001256	Organic compounds	Organic nitrogen compounds	Organonitrogen compounds	Amines	Dialkylamines	Endogenous;Food;Biological;Tissue and substructures;Cell and elements;Organ and components;Biofluid and excreta;Subcellular;Biological process;Antioxidant;Pharmaceutical industry
Com_594_pos	Histamine	C5H9N3	HMDB0000870	Organic compounds	Organic nitrogen compounds	Organonitrogen compounds	Amines	2-arylethylamines	Endogenous;Food;Biological;Environmental;Subcellular;Organ and components;Tissue and substructures;Biofluid and excreta;Cell and elements;Water disinfection;Biological process;Molecular messenger;Food and nutrition;Pharmaceutical industry;Water pollutant
Com_596_pos	Sepiapterin	C9H11N5O3	HMDB0000238	Organic compounds	Organoheterocyclic compounds	Pteridines and derivatives	Pterins and derivatives	Pterins and derivatives	Endogenous;Biofluid and excreta;Subcellular;Biological process
Com_597_pos	11-cis-Retinol	C20H30O	HMDB0006216	Organic compounds	Lipids and lipid-like molecules	Prenol lipids	Retinoids	Retinoids	Endogenous;Food;Biological;Cell and elements;Subcellular;Biological process;Surfactant;Emulsifier;Membrane stabilizer;Energy source;Energy storage;Nutrient
Com_598_pos	Quinone	C6H4O2	HMDB0003364	Organic compounds	Organic oxygen compounds	Organooxygen compounds	Carbonyl compounds	P-benzoquinones	Endogenous;Food;Biological;Subcellular;Tissue and substructures;Cell and elements;Biofluid and excreta;Organ and components;Biological process;Air pollutant;Hazardous air pollutant
Com_600_pos	3-Amino-4-methylpentanoic acid	C6H13NO2	HMDB0245808	Organic compounds	Organic acids and derivatives	Carboxylic acids and derivatives	Amino acids, peptides, and analogues	Beta amino acids and derivatives	-
Com_601_pos	L-Lysine	C6H14N2O2	HMDB0000182	Organic compounds	Organic acids and derivatives	Carboxylic acids and derivatives	Amino acids, peptides, and analogues	L-alpha-amino acids	Food;Synthetic;Biological;Tissue and substructures;Organ and components;Biofluid and excreta;Subcellular;Cell and elements;Biological process;Drug;Personal care products;Food and nutrition;Pharmaceutical industry;Essential amino acid;Trace element
Com_603_pos	Thiamine	C12H17N4OS+	HMDB0000235	Organic compounds	Organoheterocyclic compounds	Diazines	Pyrimidines and pyrimidine derivatives	Thiamines	Food;Synthetic;Biological;Organ and components;Tissue and substructures;Biofluid and excreta;Cell and elements;Subcellular;Biological process;Drug;Food and nutrition;Personal care products;Pharmaceutical industry;Essential vitamin
Com_604_pos	Vitamin U	C6H14ClNO2S	HMDB0038670	Organic compounds	Organic acids and derivatives	Carboxylic acids and derivatives	Amino acids, peptides, and analogues	Methionine and derivatives	Food;Biological;Subcellular;Cell and elements;Nutrient
Com_605_pos	Acetylcholine	C7H16INO2	HMDB0000895	Organic compounds	Organic nitrogen compounds	Organonitrogen compounds	Quaternary ammonium salts	Acyl cholines	Endogenous;Food;Biological;Organ and components;Tissue and substructures;Biofluid and excreta;Subcellular;Cell and elements;Biological process;Pharmaceutical industry
Com_606_pos	Metformin	C4H11N5	HMDB0001921	Organic compounds	Organic nitrogen compounds	Organonitrogen compounds	Guanidines	Biguanides	Environmental;Enteral;Organ and components;Tissue and substructures;Subcellular;Biofluid and excreta;Environmental contaminant;Drug;Pharmaceutical industry
Com_607_pos	dGMP	C10H14N5O7P	HMDB0001044	Organic compounds	Nucleosides, nucleotides, and analogues	Purine nucleotides	Purine deoxyribonucleotides	Purine 2'-deoxyribonucleoside monophosphates	Endogenous;Subcellular;Biological process;Pharmaceutical industry
Com_608_pos	S-Adenosyl-L-homocysteine	C14H20N6O5S	HMDB0000939	Organic compounds	Organoheterocyclic compounds	Lactones	Gamma butyrolactones	Gamma butyrolactones	Endogenous;Food;Biological;Organ and components;Cell and elements;Tissue and substructures;Biofluid and excreta;Subcellular;Biological process;Immunotoxin;Metabotoxin;Pharmaceutical industry;Drug metabolite;Waste product
Com_609_pos	thiamine phosphate	C12H18ClN4O4PS	HMDB0002666	Organic compounds	Organoheterocyclic compounds	Diazines	Pyrimidines and pyrimidine derivatives	Thiamine phosphates	Endogenous;Biofluid and excreta;Subcellular;Cell and elements;Biological process;Pharmaceutical industry
Com_610_pos	L-arginino-succinate	C10H18N4O6	HMDB0304399	Organic compounds	Organic acids and derivatives	Carboxylic acids and derivatives	Amino acids, peptides, and analogues	Arginine and derivatives	-
Com_611_pos	L-Normetanephrine	C9H13NO3	HMDB0000819	Organic compounds	Benzenoids	Phenols	Methoxyphenols	Methoxyphenols	Endogenous;Cell and elements;Organ and components;Biofluid and excreta;Subcellular;Biological process
Com_612_pos	Cystine	C6H12N2O4S2	HMDB0250712	Organic compounds	Organic acids and derivatives	Carboxylic acids and derivatives	Amino acids, peptides, and analogues	Cysteine and derivatives	-
Com_614_pos	Dimethyl fumarate	C6H8O4	HMDB0031257	Organic compounds	Lipids and lipid-like molecules	Fatty Acyls	Fatty acid esters	Fatty acid esters	Endogenous;Food;Biological;Biofluid and excreta;Subcellular;Cell and elements;Biological process;Surfactant;Emulsifier;Membrane stabilizer;Energy source;Energy storage;Nutrient
Com_615_pos	Adipic Acid	C6H10O4	HMDB0000448	Organic compounds	Lipids and lipid-like molecules	Fatty Acyls	Fatty acids and conjugates	Medium-chain fatty acids	Endogenous;Food;Synthetic;Biological;Organ and components;Biofluid and excreta;Subcellular;Biological process;Air pollutant;Drug;Food and nutrition;Personal care products;Drug metabolite;Waste product;Nutrient;Energy storage;Energy source;Membrane stabilizer
Com_616_pos	Maleic Acid	C4H4O4	HMDB0000176	Organic compounds	Organic acids and derivatives	Carboxylic acids and derivatives	Dicarboxylic acids and derivatives	Dicarboxylic acids and derivatives	Endogenous;Food;Biological;Tissue and substructures;Organ and components;Biofluid and excreta;Subcellular;Cell and elements;Biological process;Membrane stabilizer;Energy source;Energy storage;Air pollutant;Surfactant;Emulsifier;Pharmaceutical industry
Com_617_pos	Pipecolinic Acid	C6H11NO2	HMDB0000716	Organic compounds	Organic acids and derivatives	Carboxylic acids and derivatives	Amino acids, peptides, and analogues	L-alpha-amino acids	Endogenous;Food;Biological;Organ and components;Biofluid and excreta;Subcellular;Biological process
Com_618_pos	Isonicotinamide	C6H6N2O	HMDB0253663	Organic compounds	Organoheterocyclic compounds	Pyridines and derivatives	Pyridinecarboxylic acids and derivatives	Pyridinecarboxamides	-
Com_620_pos	1,3-Diaminopropane	C3H10N2	HMDB0000002	Organic compounds	Organic nitrogen compounds	Organonitrogen compounds	Amines	Monoalkylamines	Endogenous;Food;Biological;Biofluid and excreta;Subcellular;Biological process
Com_621_pos	trans-Cinnamic acid	C9H8O2	HMDB0000930	Organic compounds	Phenylpropanoids and polyketides	Cinnamic acids and derivatives	Cinnamic acids	Cinnamic acids	Endogenous;Food;Biological;Subcellular;Biofluid and excreta;Food and nutrition
Com_622_pos	Pyrrole-2-carboxylate	C5H5NO2	HMDB0004230	Organic compounds	Organoheterocyclic compounds	Pyrroles	Pyrrole carboxylic acids and derivatives	Pyrrole 2-carboxylic acids	Endogenous;Pharmaceutical industry
Com_623_pos	Oxypurinol	C5H4N4O2	HMDB0000786	Organic compounds	Organoheterocyclic compounds	Imidazopyrimidines	Purines and purine derivatives	Xanthines	Endogenous;Subcellular;Biofluid and excreta;Pharmaceutical industry;Drug metabolite;Waste product
Com_626_pos	7-Methylguanine	C6H7N5O	HMDB0000897	Organic compounds	Organoheterocyclic compounds	Imidazopyrimidines	Purines and purine derivatives	Hypoxanthines	Endogenous;Tissue and substructures;Cell and elements;Subcellular;Biofluid and excreta
Com_627_pos	7-Ketocholesterol	C27H44O2	HMDB0000501	Organic compounds	Lipids and lipid-like molecules	Steroids and steroid derivatives	Cholestane steroids	Cholesterols and derivatives	Endogenous;Food;Biological;Cell and elements;Tissue and substructures;Subcellular;Biofluid and excreta;Biological process;Membrane stabilizer;Energy source;Energy storage;Inflammatory;Molecular messenger;Surfactant;Emulsifier
Com_628_pos	Propionyl-L-carnitine	C10H19NO4	HMDB0000824	Organic compounds	Lipids and lipid-like molecules	Fatty Acyls	Fatty acid esters	Acyl carnitines	Endogenous;Food;Biological;Tissue and substructures;Biofluid and excreta;Subcellular;Cell and elements;Biological process;Surfactant;Emulsifier;Pharmaceutical industry;Membrane stabilizer;Energy source;Energy storage;Nutrient
Com_629_pos	Punicic Acid	C18H30O2	HMDB0030963	Organic compounds	Lipids and lipid-like molecules	Fatty Acyls	Lineolic acids and derivatives	Lineolic acids and derivatives	Endogenous;Food;Biological;Cell and elements;Subcellular;Biological process;Surfactant;Emulsifier;Nutrient;Energy storage;Energy source;Membrane stabilizer
Com_630_pos	Pro-Leu	C11H20N2O3	HMDB0253028	Organic compounds	Organic acids and derivatives	Carboxylic acids and derivatives	Amino acids, peptides, and analogues	Dipeptides	-
Com_631_pos	Propionylcholine	C8H18NO2+	HMDB0013305	Organic compounds	Organic nitrogen compounds	Organonitrogen compounds	Quaternary ammonium salts	Acyl cholines	Endogenous
Com_632_pos	p-Mentha-1,3,8-triene	C10H14	HMDB0037013	Organic compounds	Lipids and lipid-like molecules	Prenol lipids	Monoterpenoids	Menthane monoterpenoids	Endogenous;Food;Biological;Cell and elements;Subcellular;Biofluid and excreta;Biological process;Surfactant;Emulsifier;Nutrient;Membrane stabilizer;Energy source;Energy storage
Com_633_pos	Porphobilinogen	C10H14N2O4	HMDB0000245	Organic compounds	Organic nitrogen compounds	Organonitrogen compounds	Amines	Aralkylamines	Endogenous;Food;Biological;Organ and components;Biofluid and excreta;Subcellular;Biological process;Neurotoxin;Phototoxin;Metabotoxin;Metabolite;Pharmaceutical industry
Com_634_pos	4-Aminobenzoate	C7H7NO2	HMDB0304171	Organic compounds	Benzenoids	Benzene and substituted derivatives	Benzoic acids and derivatives	Aminobenzoic acids	-
Com_635_pos	Picolinamide	C6H6N2O	HMDB0256533	Organic compounds	Organoheterocyclic compounds	Pyridines and derivatives	Pyridinecarboxylic acids and derivatives	Pyridinecarboxamides	-
Com_636_pos	5-Methyl-2'-deoxycytidine	C10H15N3O4	HMDB0002224	Organic compounds	Nucleosides, nucleotides, and analogues	Pyrimidine nucleosides	Pyrimidine 2'-deoxyribonucleosides	Pyrimidine 2'-deoxyribonucleosides	Endogenous
Com_638_pos	Guggulsterone	C21H28O2	HMDB0002726	Organic compounds	Lipids and lipid-like molecules	Steroids and steroid derivatives	Androstane steroids	Androgens and derivatives	Endogenous;Food;Biological;Biological process;Membrane stabilizer;Energy source;Energy storage;Molecular messenger;Surfactant;Emulsifier
Com_640_pos	Guanine	C5H5N5O	HMDB0000132	Organic compounds	Organoheterocyclic compounds	Imidazopyrimidines	Purines and purine derivatives	Purines and purine derivatives	Endogenous;Food;Biological;Tissue and substructures;Subcellular;Organ and components;Biofluid and excreta;Cell and elements;Biological process;Pharmaceutical industry
Com_641_pos	Imatinib	C29H31N7O	HMDB0014757	Organic compounds	Organoheterocyclic compounds	Azolidines	Oxazolidines	Oxazolidinediones	-
Com_642_pos	Hydrocortisone 17-butyrate	C25H36O6	HMDB0253243	Organic compounds	Lipids and lipid-like molecules	Steroids and steroid derivatives	Hydroxysteroids	21-hydroxysteroids	-
Com_643_pos	Homoserine	C4H9NO3	HMDB0000719	Organic compounds	Organic acids and derivatives	Carboxylic acids and derivatives	Amino acids, peptides, and analogues	L-alpha-amino acids	Endogenous;Food;Biological;Organ and components;Biofluid and excreta;Cell and elements;Biological process;Pharmaceutical industry
Com_644_pos	Homocysteic acid	C4H9NO5S	HMDB0251520	Organic compounds	Organic acids and derivatives	Carboxylic acids and derivatives	Amino acids, peptides, and analogues	Alpha amino acids	-
Com_645_pos	glutathione disulfide	C20H32N6O12S2	HMDB0003337	Organic compounds	Organic acids and derivatives	Carboxylic acids and derivatives	Amino acids, peptides, and analogues	Peptides	Endogenous;Food;Biological;Organ and components;Tissue and substructures;Biofluid and excreta;Cell and elements;Subcellular;Biological process
Com_646_pos	Phe-Pro	C14H18N2O3	HMDB0011177	Organic compounds	Organic acids and derivatives	Carboxylic acids and derivatives	Amino acids, peptides, and analogues	Dipeptides	Endogenous
Com_647_pos	Phe-Phe	C18H20N2O3	HMDB0013302	Organic compounds	Organic acids and derivatives	Carboxylic acids and derivatives	Amino acids, peptides, and analogues	Dipeptides	Endogenous
Com_649_pos	trans-3-Hydroxy-L-proline	C5H9NO3	HMDB0059659	Organic compounds	Organic acids and derivatives	Carboxylic acids and derivatives	Amino acids, peptides, and analogues	Proline and derivatives	-
Com_650_pos	4-Acetamidobutanoate	C6H11NO3	HMDB0003681	Organic compounds	Organic acids and derivatives	Carboxylic acids and derivatives	Amino acids, peptides, and analogues	Gamma amino acids and derivatives	Endogenous;Food;Biological;Tissue and substructures;Organ and components;Biofluid and excreta;Cell and elements;Subcellular;Biological process;Surfactant;Emulsifier;Membrane stabilizer;Energy source;Energy storage
Com_651_pos	Val-Ser	C8H16N2O4	HMDB0029136	Organic compounds	Organic acids and derivatives	Carboxylic acids and derivatives	Amino acids, peptides, and analogues	Dipeptides	Endogenous
Com_652_pos	L-Alanine	C3H7NO2	HMDB0000161	Organic compounds	Organic acids and derivatives	Carboxylic acids and derivatives	Amino acids, peptides, and analogues	Alanine and derivatives	Endogenous;Food;Synthetic;Biological;Tissue and substructures;Organ and components;Biofluid and excreta;Subcellular;Cell and elements;Biological process;Food and nutrition;Personal care products
Com_653_pos	L-Aspartic acid	C4H7NO4	HMDB0000191	Organic compounds	Organic acids and derivatives	Carboxylic acids and derivatives	Amino acids, peptides, and analogues	Aspartic acid and derivatives	Endogenous;Food;Biological;Tissue and substructures;Organ and components;Biofluid and excreta;Subcellular;Cell and elements;Biological process;Pharmaceutical industry;Essential amino acid
Com_654_pos	beta-Nicotinamide mononucleotide	C11H15N2O8P	HMDB0000229	Organic compounds	Nucleosides, nucleotides, and analogues	Pyridine nucleotides	Nicotinamide nucleotides	Nicotinamide nucleotides	Endogenous;Tissue and substructures;Biofluid and excreta;Subcellular;Biological process
Com_655_pos	Creatine	C4H9N3O2	HMDB0000064	Organic compounds	Organic acids and derivatives	Carboxylic acids and derivatives	Amino acids, peptides, and analogues	Alpha amino acids and derivatives	Endogenous;Food;Synthetic;Biological;Organ and components;Tissue and substructures;Biofluid and excreta;Subcellular;Cell and elements;Biological process;Metabolite;Personal care products;Food and nutrition;Pharmaceutical industry
Com_656_pos	Choline Glycerophosphate	C8H20NO6P	HMDB0252858	Organic compounds	Lipids and lipid-like molecules	Glycerophospholipids	Glycerophosphocholines	Glycerophosphocholines	-
Com_657_pos	DL-Citrulline	C6H13N3O3	HMDB0250742	Organic compounds	Organic acids and derivatives	Carboxylic acids and derivatives	Amino acids, peptides, and analogues	Alpha amino acids	-
Com_658_pos	4-Aminobutyric acid	C4H9NO2	HMDB0000112	Organic compounds	Organic acids and derivatives	Carboxylic acids and derivatives	Amino acids, peptides, and analogues	Gamma amino acids and derivatives	Endogenous;Food;Synthetic;Biological;Tissue and substructures;Organ and components;Biofluid and excreta;Cell and elements;Subcellular;Biological process;Neurotoxin;Metabotoxin;Molecular messenger;Food and nutrition;Personal care products;Pharmaceutical industry
Com_659_pos	Glycine	C2H5NO2	HMDB0000123	Organic compounds	Organic acids and derivatives	Carboxylic acids and derivatives	Amino acids, peptides, and analogues	Alpha amino acids	Endogenous;Food;Synthetic;Biological;Organ and components;Tissue and substructures;Biofluid and excreta;Cell and elements;Subcellular;Biological process;Trace element;Molecular messenger;Personal care products;Food and nutrition;Pharmaceutical industry
Com_660_pos	L-Arginine	C6H14N4O2	HMDB0000517	Organic compounds	Organic acids and derivatives	Carboxylic acids and derivatives	Amino acids, peptides, and analogues	L-alpha-amino acids	Endogenous;Food;Synthetic;Biological;Tissue and substructures;Organ and components;Biofluid and excreta;Subcellular;Cell and elements;Biological process;Drug;Personal care products;Food and nutrition;Pharmaceutical industry;Drug metabolite;Essential amino acid;Semiessential amino acid;Waste product;Trace element
Com_661_pos	L-Cysteine	C3H7NO2S	HMDB0000574	Organic compounds	Organic acids and derivatives	Carboxylic acids and derivatives	Amino acids, peptides, and analogues	Cysteine and derivatives	Endogenous;Food;Synthetic;Biological;Organ and components;Tissue and substructures;Biofluid and excreta;Subcellular;Cell and elements;Biological process;Food and nutrition;Personal care products;Pharmaceutical industry;Drug metabolite;Waste product
Com_662_pos	Nicotinate ribonucleoside	C11H13NO6	HMDB0006809	Organic compounds	Organic oxygen compounds	Organooxygen compounds	Carbohydrates and carbohydrate conjugates	Glycosylamines	Endogenous;Biological process
Com_663_pos	S-Methyl-L-cysteine	C4H9NO2S	HMDB0302211	Organic compounds	Organic acids and derivatives	Carboxylic acids and derivatives	Amino acids, peptides, and analogues	L-cysteine-S-conjugates	-
Com_666_pos	Cholesterol	C27H46O	HMDB0000067	Organic compounds	Lipids and lipid-like molecules	Steroids and steroid derivatives	Cholestane steroids	Cholesterols and derivatives	Endogenous;Food;Synthetic;Biological;Cell and elements;Tissue and substructures;Organ and components;Biofluid and excreta;Subcellular;Biological process;Atherogen;Personal care products;Surfactant;Emulsifier;Pharmaceutical industry;Membrane stabilizer;Energy source;Energy storage;Inflammatory;Molecular messenger
Com_667_pos	5'-Deoxy-5'-(methylthio)adenosine	C11H15N5O3S	HMDB0001173	Organic compounds	Nucleosides, nucleotides, and analogues	5'-deoxyribonucleosides	5'-deoxy-5'-thionucleosides	5'-deoxy-5'-thionucleosides	Endogenous;Food;Biological;Tissue and substructures;Organ and components;Cell and elements;Biofluid and excreta;Subcellular;Biological process;Pharmaceutical industry
Com_668_pos	L-Valine	C5H11NO2	HMDB0000883	Organic compounds	Organic acids and derivatives	Carboxylic acids and derivatives	Amino acids, peptides, and analogues	Valine and derivatives	Food;Synthetic;Biological;Tissue and substructures;Biofluid and excreta;Cell and elements;Subcellular;Biological process;Personal care products;Food and nutrition;Pharmaceutical industry;Essential amino acid;Trace element
Com_670_pos	4-aminobutyrate	C4H9NO2	HMDB0000112	Organic compounds	Organic acids and derivatives	Carboxylic acids and derivatives	Amino acids, peptides, and analogues	Gamma amino acids and derivatives	Endogenous;Food;Synthetic;Biological;Tissue and substructures;Organ and components;Biofluid and excreta;Cell and elements;Subcellular;Biological process;Neurotoxin;Metabotoxin;Molecular messenger;Food and nutrition;Personal care products;Pharmaceutical industry
Com_671_pos	3-Methylhistidine	C7H13N3O3	HMDB0000479	Organic compounds	Organic acids and derivatives	Carboxylic acids and derivatives	Amino acids, peptides, and analogues	Histidine and derivatives	Endogenous;Organ and components;Tissue and substructures;Biofluid and excreta;Subcellular;Biological process
Com_673_pos	3-Methoxytyramine	C9H13NO2	HMDB0000022	Organic compounds	Benzenoids	Phenols	Methoxyphenols	Methoxyphenols	Endogenous;Organ and components;Biofluid and excreta;Subcellular;Biological process
Com_676_pos	3-Guanidinopropanoate	C4H9N3O2	HMDB0013222	Organic compounds	Organic nitrogen compounds	Organonitrogen compounds	Guanidines	Guanidines	Endogenous
Com_677_pos	3,5-Diiodo-L-thyronine	C15H13I2NO4	HMDB0000582	Organic compounds	Organic acids and derivatives	Carboxylic acids and derivatives	Amino acids, peptides, and analogues	Phenylalanine and derivatives	Endogenous;Organ and components;Subcellular;Biofluid and excreta
Com_678_pos	3'-Adenylic acid	C10H14N5O7P	HMDB0003540	Organic compounds	Nucleosides, nucleotides, and analogues	Ribonucleoside 3'-phosphates	-	Ribonucleoside 3'-phosphates	Endogenous;Biological process
