# Supplementary material for: Association analysis of transcriptome and quasi-targeted metabolomics reveals the regulation mechanism underlying broiler muscle tissue development at different levels of dietary guanidinoacetic acid
Source: Frontiers journal article supplement (doi:10.3389/fvets.2024.1384028), 2024-04-25
Supplement: Data_Sheet_1.ZIP [file meta_all_hmdb_anno_category.xls]

SuperClass	Metabolites_nums	Metabolites	Metabolite_Descriptions
Alkaloids and derivatives	1	Com_537_pos	Trigonelline
Benzenoids	38	Com_22_neg,Com_31_neg,Com_37_neg,Com_43_neg,Com_95_neg,Com_98_neg,Com_126_neg,Com_135_neg,Com_180_neg,Com_181_neg,Com_212_neg,Com_218_neg,Com_238_neg,Com_240_neg,Com_255_neg,Com_260_neg,Com_339_pos,Com_364_pos,Com_372_pos,Com_404_pos,Com_419_pos,Com_423_pos,Com_436_pos,Com_437_pos,Com_438_pos,Com_457_pos,Com_465_pos,Com_474_pos,Com_478_pos,Com_507_pos,Com_526_pos,Com_528_pos,Com_530_pos,Com_569_p…	4-Hydroxyphenylethanol,Monobutyl phthalate,O-Desmethylnaproxen,Anthranilic acid,4-Hydroxyphenylpyruvate,Tolfenamic acid,Diflunisal,2-Phenylbutyric acid,Irbesartan,Hydroquinone,3-Methylsalicylate,2,4-Dihydroxybenzoic Acid,Bisphenol A,4-Nitrophenol,L-Adrenaline,4-Hydroxybenzoic acid,Fexofenadine,5-Aminosalicylate,Isoproterenol,1-(4-Methoxyphenyl)-2-propanone,Metanephrine,1,4-Naphthoquinone,Tyramine…
Homogeneous non-metal compounds	1	Com_117_neg	Pyrophosphate
Hydrocarbon derivatives	1	Com_237_neg	Tropolone
Lipids and lipid-like molecules	94	Com_2_neg,Com_4_neg,Com_6_neg,Com_16_neg,Com_24_neg,Com_29_neg,Com_30_neg,Com_33_neg,Com_46_neg,Com_54_neg,Com_55_neg,Com_61_neg,Com_64_neg,Com_69_neg,Com_71_neg,Com_72_neg,Com_76_neg,Com_88_neg,Com_93_neg,Com_94_neg,Com_102_neg,Com_115_neg,Com_118_neg,Com_120_neg,Com_127_neg,Com_137_neg,Com_138_neg,Com_139_neg,Com_141_neg,Com_151_neg,Com_170_neg,Com_177_neg,Com_191_neg,Com_207_neg,Com_213_neg,Co…	2,3-Dinor-TXB2,Decanoic acid,12(S)-HETE,15-Hete,13,14-dihydro-15-keto-PGD2,Undecanedioic acid,Nonadecanoic acid,2-Hydroxy-3-methylbutanoic acid,cholesteryl sulfate,Allolithocholic acid,Isolithocholic acid,gamma-Muricholate,Prostaglandin B2,3-Methyladipic acid,Prostaglandin H2,Prostaglandin D2,Stearic acid,Ethylmalonate,Sebacic acid,Tiglic acid,2-Hydroxyisocaproic Acid,Prostaglandin I2,Prostagland…
Nucleosides, nucleotides, and analogues	57	Com_11_neg,Com_13_neg,Com_25_neg,Com_38_neg,Com_42_neg,Com_50_neg,Com_65_neg,Com_77_neg,Com_86_neg,Com_109_neg,Com_113_neg,Com_133_neg,Com_142_neg,Com_145_neg,Com_155_neg,Com_165_neg,Com_168_neg,Com_187_neg,Com_209_neg,Com_211_neg,Com_226_neg,Com_233_neg,Com_234_neg,Com_242_neg,Com_245_neg,Com_261_neg,Com_266_neg,Com_267_neg,Com_293_neg,Com_336_pos,Com_345_pos,Com_358_pos,Com_390_pos,Com_394_pos,…	UMP,Deoxyguanosine,dCMP,Nelarabine,ATP,ADP-ribose,Uridine 5'-Diphospho-N-Acetylgalactosamine,3'-Dephospho-CoA,dUMP,Thymidine,Riboflavin-5-phosphate,APS,Cytidine 5'-Monophosphate-N-Acetylneuraminic Acid,dTMP,Thymidine 5'-diphosphate,UDP,dATP,Cytidine-5'-monophosphate,dADP,dGTP,Adenosine 5'-Diphosphate,Deoxycytidine,UDP-D-glucose,CDP,UDP-galactose,Deoxyinosine,Orotidine,NADH,IDP,S-Methyl-5'-thioade…
Organic acids and derivatives	176	Com_12_neg,Com_15_neg,Com_18_neg,Com_20_neg,Com_26_neg,Com_27_neg,Com_35_neg,Com_36_neg,Com_40_neg,Com_45_neg,Com_49_neg,Com_51_neg,Com_59_neg,Com_67_neg,Com_68_neg,Com_73_neg,Com_74_neg,Com_75_neg,Com_78_neg,Com_79_neg,Com_80_neg,Com_87_neg,Com_90_neg,Com_96_neg,Com_108_neg,Com_112_neg,Com_116_neg,Com_121_neg,Com_124_neg,Com_146_neg,Com_147_neg,Com_148_neg,Com_149_neg,Com_152_neg,Com_153_neg,Com…	L-Threonine,L-Asparagine,Beta-Alanine,3-Hydroxypropanoic acid,Pantetheine,4-Hydroxy-2-oxoglutaric acid,2-Oxoadipic acid,Phosphonotyrosine,Carbamoylphosphate,cis-4-Hydroxy-D-proline,Acetyl phosphate,Ala-trp,Isocitrate,L-Lactic acid,L-Malate,Phosphocreatine,L-Histidine,D-threo-Isocitric acid,L-Homoserine,DL-o-Tyrosine,D-Lactic acid,Fosfomycin,Methylmalonate,Oxaloacetate,Succinic acid,cis-Aconitic a…
Organic nitrogen compounds	14	Com_320_pos,Com_362_pos,Com_420_pos,Com_426_pos,Com_450_pos,Com_493_pos,Com_593_pos,Com_594_pos,Com_605_pos,Com_606_pos,Com_620_pos,Com_631_pos,Com_633_pos,Com_676_pos	Cadaverine,Spermidine,Ethambutol,1,4-Diaminobutane,L-Carnitine,Trimethylamine N-oxide,Spermine,Histamine,Acetylcholine,Metformin,1,3-Diaminopropane,Propionylcholine,Porphobilinogen,3-Guanidinopropanoate
Organic oxygen compounds	59	Com_5_neg,Com_8_neg,Com_9_neg,Com_10_neg,Com_14_neg,Com_17_neg,Com_32_neg,Com_47_neg,Com_48_neg,Com_56_neg,Com_63_neg,Com_66_neg,Com_70_neg,Com_81_neg,Com_82_neg,Com_84_neg,Com_85_neg,Com_91_neg,Com_92_neg,Com_103_neg,Com_107_neg,Com_114_neg,Com_125_neg,Com_129_neg,Com_134_neg,Com_136_neg,Com_144_neg,Com_158_neg,Com_159_neg,Com_160_neg,Com_164_neg,Com_166_neg,Com_167_neg,Com_171_neg,Com_183_neg,C…	Maltotriose,1-Caffeoylquinic Acid,D-Glucose 6-phosphate,5'-Adenylic acid,Trehalose,Shikimic Acid,D-Ribose,6-Phospho-D-glucono-1,5-lactone,6-Phospho-D-gluconate,D-Mannose 6-phosphate,L-Fucose,D-Glucuronic acid,CTP,Dihydroxyacetone phosphate,Sucrose,D-Xylulose 5-phosphate,D-Xylonate,Dulcitol,Gluconolactone,Trehalose 6-phosphate,scyllo-Inositol,D-Glucopyranose,Glucotropaeolin,3-Phosphoglyceric acid,…
Organoheterocyclic compounds	69	Com_3_neg,Com_39_neg,Com_44_neg,Com_97_neg,Com_104_neg,Com_110_neg,Com_111_neg,Com_122_neg,Com_123_neg,Com_130_neg,Com_131_neg,Com_157_neg,Com_243_neg,Com_244_neg,Com_257_neg,Com_258_neg,Com_259_neg,Com_285_neg,Com_324_pos,Com_326_pos,Com_331_pos,Com_333_pos,Com_334_pos,Com_335_pos,Com_348_pos,Com_352_pos,Com_353_pos,Com_359_pos,Com_369_pos,Com_370_pos,Com_378_pos,Com_384_pos,Com_392_pos,Com_402_…	Indolelactate,N-Oleoyl Glycine,Alloxan,Tetrahydroaldosterone,Citicoline,Cytosine,Xanthurenic Acid,Hydantoin-5-propionic acid,Indoleacetaldehyde,5,6-Dihydroxyindole-2-Carboxylic Acid,4-Pyridoxic acid,Uric Acid,N-Methylhydantoin,UDP-D-glucuronate,L-Ascorbate,4-Amino-5-imidazolecarboxamide,Xanthine,5-Hydroxymethyluracil,Uracil,L-Tryptophan,6-Methylmercaptopurine,Piperidine,Isoquinoline,Purine,7,8-Di…
Phenylpropanoids and polyketides	9	Com_21_neg,Com_58_neg,Com_161_neg,Com_184_neg,Com_205_neg,Com_332_pos,Com_340_pos,Com_539_pos,Com_621_pos	Hydroxyphenyllactic acid,m-Coumaric acid,dGDP,D-3-Phenyllactic acid,4-Hydroxyphenyllactate,2-Hydroxycinnamate,Feruloylcholine,Phloretate,trans-Cinnamic acid
