# Supplementary material for: Association analysis of transcriptome and quasi-targeted metabolomics reveals the regulation mechanism underlying broiler muscle tissue development at different levels of dietary guanidinoacetic acid
Source: Frontiers journal article supplement (doi:10.3389/fvets.2024.1384028), 2024-04-25
Supplement: Data_Sheet_1.ZIP [file meta_all_kegg_anno.xls]

Compound_ID	Name	Kegg_ID	Kegg_name	Formula	Kegg_map
Com_369_pos	Dihydrouracil	cpd:C00429	5,6-Dihydrouracil; Dihydro-2,4(1H,3H)-pyrimidinedione; Dihydrouracile; Dihydrouracil; 5,6-Dihydro-2,4-dihydroxypyrimidine; Hydrouracil; 2,4-Dioxotetrahydropyrimidine	C4H6N2O2	map00240 Pyrimidine metabolism;map00410 beta-Alanine metabolism;map00770 Pantothenate and CoA biosynthesis;map01100 Metabolic pathways
Com_288_neg	Methyl beta-D-galactopyranoside	cpd:C03619	Methyl beta-D-galactoside; Methyl beta-D-galactopyranoside	C7H14O6	map02010 ABC transporters
Com_645_pos	glutathione disulfide	cpd:C00127	Glutathione disulfide; GSSG; Oxiglutatione; Oxidized glutathione	C20H32N6O12S2	map00480 Glutathione metabolism;map04216 Ferroptosis
Com_479_pos	L-Serine	cpd:C00065	L-Serine; L-2-Amino-3-hydroxypropionic acid; L-3-Hydroxy-alanine; Serine	C3H7NO3	map00260 Glycine, serine and threonine metabolism;map00270 Cysteine and methionine metabolism;map00600 Sphingolipid metabolism;map00630 Glyoxylate and dicarboxylate metabolism;map00920 Sulfur metabolism;map00970 Aminoacyl-tRNA biosynthesis;map01100 Metabolic pathways;map01200 Carbon metabolism;map01230 Biosynthesis of amino acids;map02010 ABC transporters
Com_32_neg	D-Ribose	cpd:C21057	D-Ribose; D-Ribopyranose	C5H10O5
Com_482_pos	D-2-Aminobutyric acid	cpd:C02261	D-2-Aminobutyrate; D-2-Aminobutyric acid; D-2-Aminobutanoic acid; (R)-2-Aminobutanoic acid	C4H9NO2
Com_559_pos	Cuminaldehyde	cpd:C06577	4-Isopropylbenzaldehyde; p-Cumic aldehyde; Cuminaldehyde	C10H12O
Com_14_neg	Trehalose	cpd:C01083	alpha,alpha-Trehalose; alpha,alpha'-Trehalose; Trehalose	C12H22O11	map00500 Starch and sucrose metabolism;map01100 Metabolic pathways;map02010 ABC transporters
Com_625_pos	N7-Methylguanosine	cpd:C20674	N7-Methylguanosine	C11H16N5O5
Com_59_neg	Isocitrate	cpd:C00311	Isocitrate; Isocitric acid; 1-Hydroxytricarballylic acid; 1-Hydroxypropane-1,2,3-tricarboxylic acid	C6H8O7	map00020 Citrate cycle (TCA cycle);map00630 Glyoxylate and dicarboxylate metabolism;map01100 Metabolic pathways;map01200 Carbon metabolism;map01210 2-Oxocarboxylic acid metabolism;map01230 Biosynthesis of amino acids
Com_581_pos	Indole-3-acetamide	cpd:C02693	(Indol-3-yl)acetamide; Indole-3-acetamide	C10H10N2O	map00380 Tryptophan metabolism
Com_481_pos	L-Glutamate	cpd:C00025	L-Glutamate; L-Glutamic acid; L-Glutaminic acid; Glutamate	C5H9NO4	map00220 Arginine biosynthesis;map00250 Alanine, aspartate and glutamate metabolism;map00330 Arginine and proline metabolism;map00340 Histidine metabolism;map00430 Taurine and hypotaurine metabolism;map00471 D-Glutamine and D-glutamate metabolism;map00480 Glutathione metabolism;map00524 Neomycin, kanamycin and gentamicin biosynthesis;map00630 Glyoxylate and dicarboxylate metabolism;map00650 Butan…
Com_335_pos	Purine	cpd:C15587	Purine; Purine base	C5H4N4
Com_414_pos	D-Galactosamine	cpd:C02262	D-Galactosamine; D-Chondrosamine; 2-Amino-2-deoxy-D-galactose	C6H13NO5	map00052 Galactose metabolism
Com_26_neg	Pantetheine	cpd:C00831	Pantetheine; (R)-Pantetheine	C11H22N2O4S	map00770 Pantothenate and CoA biosynthesis
Com_325_pos	Estradiol Benzoate	cpd:C13444	Estradiol benzoate; 17-beta-Estradiol 3-benzoate	C25H28O3
Com_362_pos	Spermidine	cpd:C00315	Spermidine; N-(3-Aminopropyl)-1,4-butane-diamine	C7H19N3	map00330 Arginine and proline metabolism;map00410 beta-Alanine metabolism;map00480 Glutathione metabolism;map01100 Metabolic pathways;map02010 ABC transporters
Com_121_neg	Succinic anhydride	cpd:C19524	Succinic anhydride; Dihydro-2,5-furandione	C4H4O3
Com_74_neg	L-Histidine	cpd:C00135	L-Histidine; (S)-alpha-Amino-1H-imidazole-4-propionic acid	C6H9N3O2	map00340 Histidine metabolism;map00410 beta-Alanine metabolism;map00970 Aminoacyl-tRNA biosynthesis;map01100 Metabolic pathways;map01230 Biosynthesis of amino acids;map02010 ABC transporters
Com_5_neg	Maltotriose	cpd:C01835	Maltotriose; Amylotriose	C18H32O16	map02010 ABC transporters
Com_480_pos	Hypoxanthine	cpd:C00262	Hypoxanthine; Purine-6-ol	C5H4N4O	map00230 Purine metabolism;map01100 Metabolic pathways
Com_11_neg	UMP	cpd:C00105	UMP; Uridylic acid; Uridine monophosphate; Uridine 5'-monophosphate; 5'Uridylic acid	C9H13N2O9P	map00240 Pyrimidine metabolism;map01100 Metabolic pathways
Com_411_pos	L-Octanoylcarnitine	cpd:C02838	L-Octanoylcarnitine	C15H29NO4
Com_572_pos	L-Cystathionine	cpd:C02291	L-Cystathionine	C7H14N2O4S	map00260 Glycine, serine and threonine metabolism;map00270 Cysteine and methionine metabolism;map01100 Metabolic pathways;map01230 Biosynthesis of amino acids
Com_71_neg	Prostaglandin H2	cpd:C00427	Prostaglandin H2; (5Z,13E)-(15S)-9alpha,11alpha-Epidioxy-15-hydroxyprosta-5,13-dienoate; (5Z,13E,15S)-9alpha,11alpha-Epidioxy-15-hydroxyprosta-5,13-dienoate; PGH2; (5Z,9alpha,11alpha,13E,15S)-9,11-Epidioxy-15-hydroxy-prosta-5,13-dienoate	C20H32O5	map00590 Arachidonic acid metabolism;map01100 Metabolic pathways
Com_294_neg	alpha-D-Galactose 1-phosphate	cpd:C00446	alpha-D-Galactose 1-phosphate; alpha-D-Galactopyranose 1-phosphate	C6H13O9P	map00052 Galactose metabolism;map00520 Amino sugar and nucleotide sugar metabolism;map01100 Metabolic pathways
Com_27_neg	4-Hydroxy-2-oxoglutaric acid	cpd:C01127	4-Hydroxy-2-oxoglutarate; 4-Hydroxy-2-oxoglutaric acid	C5H6O6	map00630 Glyoxylate and dicarboxylate metabolism
Com_92_neg	Gluconolactone	cpd:C00198	D-Glucono-1,5-lactone; Gluconic lactone; Gluconic acid lactone; 1,5-Gluconolactone; delta-Gluconolactone; D-Gluconolactone; Gluconolactone	C6H10O6	map00030 Pentose phosphate pathway;map01100 Metabolic pathways;map01200 Carbon metabolism
Com_319_pos	Ectoine	cpd:C06231	Ectoine; L-Ectoine; (4S)-2-Methyl-1,4,5,6-tetrahydropyrimidine-4-carboxylate	C6H10N2O2	map00260 Glycine, serine and threonine metabolism;map01100 Metabolic pathways
Com_316_pos	Pantethine	cpd:C12661	Pantethine	C22H42N4O8S2
Com_198_neg	L-Homocystine	cpd:C01817	L-Homocystine; Homocystine	C8H16N2O4S2	map00270 Cysteine and methionine metabolism
Com_453_pos	Nicotinamide	cpd:C00153	Nicotinamide; Nicotinic acid amide; Niacinamide; Vitamin PP	C6H6N2O	map00760 Nicotinate and nicotinamide metabolism;map01100 Metabolic pathways
Com_147_neg	Aminomalonic acid	cpd:C00872	Aminomalonate; Aminomalonic acid; 2-Aminomalonic acid	C3H5NO4
Com_634_pos	4-Aminobenzoate	cpd:C00568	4-Aminobenzoate; ABEE; 4-Aminobenzoic acid; p-Aminobenzoate	C7H7NO2	map00790 Folate biosynthesis;map01100 Metabolic pathways
Com_64_neg	Prostaglandin B2	cpd:C05954	Prostaglandin B2; PGB2	C20H30O4	map00590 Arachidonic acid metabolism;map01100 Metabolic pathways
Com_532_pos	19-Norethisterone	cpd:C05028	Norethindrone; 19-Norethisterone; 19-Nor-17alpha-ethynyl-17beta-hydroxy-4-androsten-3-one	C20H26O2
Com_78_neg	L-Homoserine	cpd:C00263	L-Homoserine; 2-Amino-4-hydroxybutyric acid	C4H9NO3	map00260 Glycine, serine and threonine metabolism;map00270 Cysteine and methionine metabolism;map00920 Sulfur metabolism;map01100 Metabolic pathways;map01230 Biosynthesis of amino acids
Com_261_neg	Deoxyinosine	cpd:C05512	Deoxyinosine	C10H12N4O4	map00230 Purine metabolism;map01100 Metabolic pathways
Com_309_pos	Isovalerylcarnitine	cpd:C20826	Isovalerylcarnitine; O-Isovaleryl-L-carnitine	C12H23NO4
Com_253_neg	Cytidine 3'-phosphate	cpd:C05822	3'-CMP; Cytidine 3'-phosphate	C9H14N3O8P	map00240 Pyrimidine metabolism
Com_626_pos	7-Methylguanine	cpd:C02242	7-Methylguanine	C6H7N5O
Com_442_pos	Pantothenic acid	cpd:C00864	Pantothenate; Pantothenic acid; (R)-Pantothenate	C9H17NO5	map00410 beta-Alanine metabolism;map00770 Pantothenate and CoA biosynthesis;map01100 Metabolic pathways
Com_167_neg	D-Fructose 1,6-bisphosphate	cpd:C00354	D-Fructose 1,6-bisphosphate	C6H14O12P2	map00400 Phenylalanine, tyrosine and tryptophan biosynthesis;map01100 Metabolic pathways;map01200 Carbon metabolism
Com_256_neg	Prostaglandin E2	cpd:C00584	Prostaglandin E2; (5Z,13E)-(15S)-11alpha,15-Dihydroxy-9-oxoprosta-5,13-dienoate; (5Z,13E)-(15S)-11alpha,15-Dihydroxy-9-oxoprost-13-enoate; Dinoprostone; PGE2	C20H32O5	map00590 Arachidonic acid metabolism;map01100 Metabolic pathways;map04080 Neuroactive ligand-receptor interaction
Com_284_neg	3-Hydroxyisovalerate	cpd:C20827	3-Hydroxyisovalerate; 3-Hydroxy-3-methylbutyrate	C5H10O3	map00280 Valine, leucine and isoleucine degradation
Com_183_neg	L-Arabinose	cpd:C11476	L-Arabinose	C5H10O5
Com_238_neg	Bisphenol A	cpd:C13624	Bisphenol A; 2,2-Bis(4-Hydroxyphenyl)propane	C15H16O2	map01100 Metabolic pathways
Com_649_pos	trans-3-Hydroxy-L-proline	cpd:C05147	trans-3-Hydroxy-L-proline; trans-L-3-Hydroxyproline	C5H9NO3	map00330 Arginine and proline metabolism
Com_188_neg	L-Pyroglutamic acid	cpd:C01879	5-Oxoproline; Pidolic acid; Pyroglutamic acid; 5-Pyrrolidone-2-carboxylic acid; Pyroglutamate; 5-Oxo-L-proline; L-Pyroglutamic acid; L-5-Pyrrolidone-2-carboxylic acid	C5H7NO3	map00480 Glutathione metabolism
Com_108_neg	Succinic acid	cpd:C00042	Succinate; Succinic acid; Butanedionic acid; Ethylenesuccinic acid	C4H6O4	map00020 Citrate cycle (TCA cycle);map00190 Oxidative phosphorylation;map00250 Alanine, aspartate and glutamate metabolism;map00350 Tyrosine metabolism;map00360 Phenylalanine metabolism;map00620 Pyruvate metabolism;map00630 Glyoxylate and dicarboxylate metabolism;map00640 Propanoate metabolism;map00650 Butanoate metabolism;map00760 Nicotinate and nicotinamide metabolism;map00920 Sulfur metabolism
Com_48_neg	6-Phospho-D-gluconate	cpd:C00345	6-Phospho-D-gluconate	C6H13O10P	map00030 Pentose phosphate pathway;map01100 Metabolic pathways;map01200 Carbon metabolism
Com_168_neg	dATP	cpd:C00131	dATP; 2'-Deoxyadenosine 5'-triphosphate; Deoxyadenosine 5'-triphosphate; Deoxyadenosine triphosphate	C10H16N5O12P3	map00230 Purine metabolism;map01100 Metabolic pathways
Com_535_pos	5,6-Dihydro-5-methyluracil	cpd:C00906	5,6-Dihydrothymine; Dihydrothymine; 5,6-Dihydro-5-methyluracil	C5H8N2O2
Com_420_pos	Ethambutol	cpd:C06984	Ethambutol	C10H24N2O2
Com_271_neg	Cholic acid	cpd:C00695	Cholic acid; Cholate; 3alpha,7alpha,12alpha-Trihydroxy-5beta-cholanate; 3alpha,7alpha,12alpha-Trihydroxy-5beta-cholanic acid	C24H40O5	map00120 Primary bile acid biosynthesis;map01100 Metabolic pathways
Com_438_pos	Dibutyl phthalate	cpd:C14214	Dibutyl phthalate; Di-n-butyl phthalate; Dibutyl 1,2-benzenedicarboxylate	C16H22O4
Com_355_pos	Etiocholanolone	cpd:C04373	Etiocholanolone; 3alpha-Hydroxy-5beta-androstan-17-one; Etiocholan-3alpha-ol-17-one; 3alpha-Hydroxyetiocholan-17-one	C19H30O2	map00140 Steroid hormone biosynthesis
Com_95_neg	4-Hydroxyphenylpyruvate	cpd:C01179	3-(4-Hydroxyphenyl)pyruvate; 4-Hydroxyphenylpyruvate; p-Hydroxyphenylpyruvic acid	C9H8O4	map00130 Ubiquinone and other terpenoid-quinone biosynthesis;map00350 Tyrosine metabolism;map00400 Phenylalanine, tyrosine and tryptophan biosynthesis;map01100 Metabolic pathways;map01210 2-Oxocarboxylic acid metabolism;map01230 Biosynthesis of amino acids
Com_383_pos	Glycyl-L-leucine	cpd:C02155	Glycyl-leucine; Glycyl-L-leucine	C8H16N2O3
Com_635_pos	Picolinamide	cpd:C01950	Picolinamide	C6H6N2O
Com_263_neg	Glutaric Acid	cpd:C00489	Glutarate; Glutaric acid; Pentanedioic acid; 1,3-Propanedicarboxylic acid	C5H8O4	map00071 Fatty acid degradation;map00310 Lysine degradation
Com_445_pos	Ergothioneine	cpd:C05570	Ergothioneine	C9H16N3O2S	map00340 Histidine metabolism
Com_604_pos	Vitamin U	cpd:C04078	Methylmethionine sulfonium salt; Methylmethionine sulfonium chloride; Vitamin U	C6H14NO2S. Cl
Com_612_pos	Cystine	cpd:C01420	Cystine; Dicysteine; alpha-Diamino-beta-dithiolactic acid	C6H12N2O4S2
Com_22_neg	4-Hydroxyphenylethanol	cpd:C06044	4-Hydroxyphenylethanol; Tyrosol	C8H10O2	map00350 Tyrosine metabolism
Com_393_pos	D-Phenylalanine	cpd:C02265	D-Phenylalanine; D-alpha-Amino-beta-phenylpropionic acid	C9H11NO2	map00360 Phenylalanine metabolism
Com_528_pos	Niflumic Acid	cpd:C13698	Niflumic acid; NFA	C13H9F3N2O2
Com_432_pos	Pseudouridine	cpd:C02067	Pseudouridine	C9H12N2O6	map00240 Pyrimidine metabolism
Com_81_neg	Dihydroxyacetone phosphate	cpd:C00111	Glycerone phosphate; Dihydroxyacetone phosphate; 3-Hydroxy-2-oxopropyl phosphate	C3H7O6P	map00010 Glycolysis / Gluconeogenesis;map00040 Pentose and glucuronate interconversions;map00051 Fructose and mannose metabolism;map00052 Galactose metabolism;map00561 Glycerolipid metabolism;map00562 Inositol phosphate metabolism;map00564 Glycerophospholipid metabolism;map00640 Propanoate metabolism;map00760 Nicotinate and nicotinamide metabolism;map01100 Metabolic pathways;map01200 Carbon metab…
Com_519_pos	N-Acetylhistamine	cpd:C05135	4-(beta-Acetylaminoethyl)imidazole; N-Acetylhistamine	C7H11N3O	map00340 Histidine metabolism
Com_556_pos	O-Acetyl-L-homoserine	cpd:C01077	O-Acetyl-L-homoserine; O-Acetylhomoserine	C6H11NO4	map00270 Cysteine and methionine metabolism;map01100 Metabolic pathways
Com_350_pos	5-Aminopentanoate	cpd:C00431	5-Aminopentanoate; 5-Aminopentanoic acid; 5-Aminovaleric acid	C5H11NO2	map00310 Lysine degradation;map00330 Arginine and proline metabolism
Com_671_pos	3-Methylhistidine	cpd:C01152	N(pi)-Methyl-L-histidine; N-pros-Methyl-L-histidine; 3-Methylhistidine; 1-Methylhistidine	C7H11N3O2	map00340 Histidine metabolism
Com_655_pos	Creatine	cpd:C00300	Creatine; alpha-Methylguanidino acetic acid; Methylglycocyamine	C4H9N3O2	map00260 Glycine, serine and threonine metabolism;map00330 Arginine and proline metabolism;map01100 Metabolic pathways
Com_389_pos	N,N-Dimethylglycine	cpd:C01026	N,N-Dimethylglycine; Dimethylglycine	C4H9NO2	map00260 Glycine, serine and threonine metabolism;map01100 Metabolic pathways
Com_661_pos	L-Cysteine	cpd:C00097	L-Cysteine; L-2-Amino-3-mercaptopropionic acid	C3H7NO2S	map00260 Glycine, serine and threonine metabolism;map00270 Cysteine and methionine metabolism;map00430 Taurine and hypotaurine metabolism;map00480 Glutathione metabolism;map00730 Thiamine metabolism;map00770 Pantothenate and CoA biosynthesis;map00920 Sulfur metabolism;map00970 Aminoacyl-tRNA biosynthesis;map01100 Metabolic pathways;map01200 Carbon metabolism;map01230 Biosynthesis of amino acids;m…
Com_67_neg	L-Lactic acid	cpd:C00186	(S)-Lactate; L-Lactate; L-Lactic acid	C3H6O3	map00010 Glycolysis / Gluconeogenesis;map00051 Fructose and mannose metabolism;map00620 Pyruvate metabolism;map00640 Propanoate metabolism;map01100 Metabolic pathways
Com_421_pos	Melamine	cpd:C08737	Melamine; 2,4,6-Triamino-1,3,5-triazine	C3H6N6
Com_615_pos	Adipic Acid	cpd:C06104	Adipate; Adipic acid; Hexanedioate; Hexan-1,6-dicarboxylate	C6H10O4	map01100 Metabolic pathways
Com_486_pos	Anserine	cpd:C01262	beta-Alanyl-N(pi)-methyl-L-histidine; Anserine	C10H16N4O3	map00340 Histidine metabolism;map00410 beta-Alanine metabolism;map01100 Metabolic pathways
Com_487_pos	(S)-2-Aminobutanoate	cpd:C02356	(S)-2-Aminobutanoate; (S)-2-Aminobutanoic acid; (S)-2-Aminobutyric acid	C4H9NO2	map00270 Cysteine and methionine metabolism;map01100 Metabolic pathways
Com_396_pos	Cytidine	cpd:C00475	Cytidine	C9H13N3O5	map00240 Pyrimidine metabolism;map01100 Metabolic pathways
Com_296_neg	N-Acetyl-D-glucosamine 6-phosphate	cpd:C00357	N-Acetyl-D-glucosamine 6-phosphate	C8H16NO9P	map00520 Amino sugar and nucleotide sugar metabolism;map01100 Metabolic pathways
Com_654_pos	beta-Nicotinamide mononucleotide	cpd:C00455	Nicotinamide D-ribonucleotide; NMN; Nicotinamide mononucleotide; Nicotinamide ribonucleotide; Nicotinamide nucleotide; beta-Nicotinamide D-ribonucleotide; beta-Nicotinamide ribonucleotide; beta-Nicotinamide mononucleotide	C11H15N2O8P	map00760 Nicotinate and nicotinamide metabolism;map01100 Metabolic pathways
Com_87_neg	Fosfomycin	cpd:C06454	Fosfomycin; Phosphonomycin; (1R,2S)-Epoxypropylphosphonate	C3H7O4P	map00440 Phosphonate and phosphinate metabolism
Com_57_neg	4-Hydroxy-6-methyl-2-pyrone	cpd:C02752	Triacetate lactone; 4-Hydroxy-6-methyl-2-pyrone	C6H6O3
Com_450_pos	L-Carnitine	cpd:C00318	L-Carnitine; L-gamma-Trimethyl-beta-hydroxybutyrobetaine; Vitamin BT; 3-Carboxy-2-hydroxy-N,N,N-trimethyl-1-propanaminium hydroxide, inner salt; Levocarnitine; (R)-Carnitine	C7H15NO3
Com_159_neg	Sedoheptulose 7-phosphate	cpd:C05382	Sedoheptulose 7-phosphate; D-Sedoheptulose 7-phosphate; D-altro-Heptulose 7-phosphate; altro-Heptulose 7-phosphate	C7H15O10P	map00030 Pentose phosphate pathway;map01100 Metabolic pathways;map01200 Carbon metabolism;map01230 Biosynthesis of amino acids
Com_177_neg	Itaconic acid	cpd:C00490	Itaconate; Itaconic acid; Methylenesuccinic acid	C5H6O4
Com_230_neg	Guanidinoacetic acid	cpd:C00581	Guanidinoacetate; Guanidinoacetic acid; Glycocyamine; N-Amidinoglycine; Guanidoacetic acid	C3H7N3O2	map00260 Glycine, serine and threonine metabolism;map00330 Arginine and proline metabolism;map01100 Metabolic pathways
Com_598_pos	Quinone	cpd:C00472	p-Benzoquinone; Quinone; Chinone; 2,5-Cyclohexadiene-1,4-dione; 1,4-Benzoquinone	C6H4O2
Com_268_neg	Chenodeoxycholic acid	cpd:C02528	Chenodeoxycholate; Chenodeoxycholic acid; 3alpha,7alpha-Dihydroxy-5beta-cholanic acid; Chenodiol	C24H40O4	map00120 Primary bile acid biosynthesis;map01100 Metabolic pathways
Com_461_pos	Isonicotinic acid	cpd:C07446	Isonicotinic acid	C6H5NO2	map00983 Drug metabolism - other enzymes
Com_452_pos	Nicotinic Acid	cpd:C00253	Nicotinate; Nicotinic acid; Niacin; 3-Pyridinecarboxylic acid	C6H5NO2	map00760 Nicotinate and nicotinamide metabolism;map01100 Metabolic pathways
Com_388_pos	N6-Acetyl-L-lysine	cpd:C02727	N6-Acetyl-L-lysine	C8H16N2O3	map00310 Lysine degradation
Com_378_pos	Adenine	cpd:C00147	Adenine; 6-Aminopurine	C5H5N5	map00230 Purine metabolism;map01100 Metabolic pathways
Com_49_neg	Acetyl phosphate	cpd:C00227	Acetyl phosphate	C2H5O5P	map00430 Taurine and hypotaurine metabolism;map00620 Pyruvate metabolism;map01100 Metabolic pathways;map01200 Carbon metabolism
Com_466_pos	L-allo-Threonine	cpd:C05519	L-Allothreonine; L-allo-Threonine	C4H9NO3	map00260 Glycine, serine and threonine metabolism;map01100 Metabolic pathways
Com_63_neg	L-Fucose	cpd:C01019	6-Deoxy-L-galactose; L-Fucose	C6H12O5	map00051 Fructose and mannose metabolism;map00520 Amino sugar and nucleotide sugar metabolism;map01100 Metabolic pathways
Com_84_neg	D-Xylulose 5-phosphate	cpd:C00231	D-Xylulose 5-phosphate	C5H11O8P	map00030 Pentose phosphate pathway;map00040 Pentose and glucuronate interconversions;map00053 Ascorbate and aldarate metabolism;map01100 Metabolic pathways;map01200 Carbon metabolism;map01230 Biosynthesis of amino acids
Com_254_neg	D-Arabinose 5-phosphate	cpd:C01112	D-Arabinose 5-phosphate	C5H11O8P	map01100 Metabolic pathways
Com_611_pos	L-Normetanephrine	cpd:C05589	L-Normetanephrine	C9H13NO3	map00350 Tyrosine metabolism;map01100 Metabolic pathways
Com_250_neg	Citraconic acid	cpd:C02226	2-Methylmaleate; Citraconate; Citraconic acid; Methylmaleic acid	C5H6O4	map00290 Valine, leucine and isoleucine biosynthesis;map01100 Metabolic pathways;map01210 2-Oxocarboxylic acid metabolism
Com_187_neg	Cytidine-5'-monophosphate	cpd:C00055	CMP; Cytidine-5'-monophosphate; Cytidylic acid	C9H14N3O8P	map00240 Pyrimidine metabolism;map01100 Metabolic pathways
Com_40_neg	Carbamoylphosphate	cpd:C00169	Carbamoyl phosphate	CH4NO5P	map00220 Arginine biosynthesis;map00230 Purine metabolism;map00240 Pyrimidine metabolism;map00250 Alanine, aspartate and glutamate metabolism;map00910 Nitrogen metabolism;map01100 Metabolic pathways;map01200 Carbon metabolism;map01230 Biosynthesis of amino acids
Com_180_neg	Irbesartan	cpd:C07469	Irbesartan	C25H28N6O
Com_433_pos	O-Acetyl-L-carnitine	cpd:C02571	O-Acetylcarnitine; O-Acetyl-L-carnitine	C9H18NO4
Com_12_neg	L-Threonine	cpd:C00188	L-Threonine; 2-Amino-3-hydroxybutyric acid	C4H9NO3	map00260 Glycine, serine and threonine metabolism;map00290 Valine, leucine and isoleucine biosynthesis;map00860 Porphyrin and chlorophyll metabolism;map00970 Aminoacyl-tRNA biosynthesis;map01100 Metabolic pathways;map01230 Biosynthesis of amino acids;map02010 ABC transporters
Com_96_neg	Oxaloacetate	cpd:C00036	Oxaloacetate; Oxalacetic acid; Oxaloacetic acid; 2-Oxobutanedioic acid; 2-Oxosuccinic acid; keto-Oxaloacetate	C4H4O5	map00010 Glycolysis / Gluconeogenesis;map00020 Citrate cycle (TCA cycle);map00250 Alanine, aspartate and glutamate metabolism;map00620 Pyruvate metabolism;map00630 Glyoxylate and dicarboxylate metabolism;map01100 Metabolic pathways
Com_557_pos	NG,NG-Dimethyl-L-arginine	cpd:C03626	NG,NG-Dimethyl-L-arginine; N,N-Dimethylarginine; Nomega,Nomega-Dimethyl-L-arginine; ADMA	C8H18N4O2
Com_640_pos	Guanine	cpd:C00242	Guanine; 2-Amino-6-hydroxypurine	C5H5N5O	map00230 Purine metabolism;map01100 Metabolic pathways
Com_523_pos	Phosphoethanolamine	cpd:C00346	Ethanolamine phosphate; O-Phosphorylethanolamine; Phosphoethanolamine; O-Phosphoethanolamine	C2H8NO4P	map00564 Glycerophospholipid metabolism;map00600 Sphingolipid metabolism;map01100 Metabolic pathways
Com_496_pos	Azelaic acid	cpd:C08261	Azelaic acid; Nonanedioic acid; 1,7-Heptanedicarboxylic acid	C9H16O4
Com_113_neg	Riboflavin-5-phosphate	cpd:C00061	FMN; Riboflavin-5-phosphate; Flavin mononucleotide	C17H21N4O9P	map00190 Oxidative phosphorylation;map00740 Riboflavin metabolism;map01100 Metabolic pathways
Com_434_pos	Thymine	cpd:C00178	Thymine; 5-Methyluracil	C5H6N2O2	map00240 Pyrimidine metabolism;map01100 Metabolic pathways
Com_285_neg	5-Hydroxymethyluracil	cpd:C03088	5-Hydroxymethyluracil	C5H6N2O3
Com_120_neg	1-Dodecanol	cpd:C02277	1-Dodecanol; Dodecylalcohol; Dodecyl alcohol; Lauryl alcohol	C12H26O
Com_494_pos	S-Adenosyl-L-methionine	cpd:C00019	S-Adenosyl-L-methionine; S-Adenosylmethionine; AdoMet; SAM	C15H22N6O5S	map00270 Cysteine and methionine metabolism;map00330 Arginine and proline metabolism;map01100 Metabolic pathways;map01230 Biosynthesis of amino acids;map04122 Sulfur relay system
Com_357_pos	Sarcosine	cpd:C00213	Sarcosine; N-Methylglycine	C3H7NO2	map00260 Glycine, serine and threonine metabolism;map00330 Arginine and proline metabolism;map01100 Metabolic pathways
Com_149_neg	Homoarginine	cpd:C01924	Homoarginine; L-Homoarginine	C7H16N4O2
Com_152_neg	Taurine	cpd:C00245	Taurine; 2-Aminoethanesulfonic acid; Aminoethylsulfonic acid	C2H7NO3S	map00120 Primary bile acid biosynthesis;map00430 Taurine and hypotaurine metabolism;map00920 Sulfur metabolism;map01100 Metabolic pathways;map02010 ABC transporters;map04080 Neuroactive ligand-receptor interaction
Com_123_neg	Indoleacetaldehyde	cpd:C00637	Indole-3-acetaldehyde; 2-(Indol-3-yl)acetaldehyde; Indoleacetaldehyde	C10H9NO	map00380 Tryptophan metabolism;map01100 Metabolic pathways
Com_107_neg	scyllo-Inositol	cpd:C06153	scyllo-Inositol; Scyllitol	C6H12O6	map00562 Inositol phosphate metabolism
Com_541_pos	3-Methylindole	cpd:C08313	Skatole; 3-Methylindole	C9H9N
Com_623_pos	Oxypurinol	cpd:C07599	Alloxanthine; Oxipurinol; Oxypurinol	C5H4N4O2
Com_668_pos	L-Valine	cpd:C00183	L-Valine; 2-Amino-3-methylbutyric acid	C5H11NO2	map00280 Valine, leucine and isoleucine degradation;map00290 Valine, leucine and isoleucine biosynthesis;map00770 Pantothenate and CoA biosynthesis;map00970 Aminoacyl-tRNA biosynthesis;map01100 Metabolic pathways;map01210 2-Oxocarboxylic acid metabolism;map01230 Biosynthesis of amino acids;map02010 ABC transporters
Com_114_neg	D-Glucopyranose	cpd:C00031	D-Glucose; Grape sugar; Dextrose; Glucose; D-Glucopyranose	C6H12O6	map00010 Glycolysis / Gluconeogenesis;map00030 Pentose phosphate pathway;map00052 Galactose metabolism;map00500 Starch and sucrose metabolism;map00520 Amino sugar and nucleotide sugar metabolism;map00524 Neomycin, kanamycin and gentamicin biosynthesis;map01100 Metabolic pathways;map02010 ABC transporters;map04068 FoxO signaling pathway;map04910 Insulin signaling pathway
Com_385_pos	D-Proline	cpd:C00763	D-Proline	C5H9NO2	map00330 Arginine and proline metabolism;map01100 Metabolic pathways
Com_333_pos	Piperidine	cpd:C01746	Piperidine; Azacyclohexane; Hexahydropyridine	C5H11N
Com_9_neg	D-Glucose 6-phosphate	cpd:C00092	D-Glucose 6-phosphate; Glucose 6-phosphate; Robison ester	C6H13O9P	map00500 Starch and sucrose metabolism;map00524 Neomycin, kanamycin and gentamicin biosynthesis;map00562 Inositol phosphate metabolism;map01100 Metabolic pathways
Com_353_pos	Pyridoxamine	cpd:C00534	Pyridoxamine; PM	C8H12N2O2	map00750 Vitamin B6 metabolism;map01100 Metabolic pathways
Com_398_pos	Glutathione	cpd:C00051	Glutathione; 5-L-Glutamyl-L-cysteinylglycine; N-(N-gamma-L-Glutamyl-L-cysteinyl)glycine; gamma-L-Glutamyl-L-cysteinyl-glycine; GSH; Reduced glutathione	C10H17N3O6S	map00270 Cysteine and methionine metabolism;map00480 Glutathione metabolism;map01100 Metabolic pathways;map02010 ABC transporters;map04216 Ferroptosis
Com_321_pos	N-Acetylneuraminic acid	cpd:C00270	N-Acetylneuraminate; N-Acetylneuraminic acid; 5-Acetamido-3,5-dideoxy-D-glycero-D-galacto-2-nonulosonic acid; Neu5Ac	C11H19NO9	map00520 Amino sugar and nucleotide sugar metabolism;map01100 Metabolic pathways
Com_15_neg	L-Asparagine	cpd:C00152	L-Asparagine; 2-Aminosuccinamic acid	C4H8N2O3	map00250 Alanine, aspartate and glutamate metabolism;map00970 Aminoacyl-tRNA biosynthesis;map01100 Metabolic pathways;map01230 Biosynthesis of amino acids
Com_546_pos	Urocanic acid	cpd:C00785	Urocanate; Urocanic acid	C6H6N2O2	map00340 Histidine metabolism;map01100 Metabolic pathways
Com_558_pos	Cytarabine	cpd:C02961	Cytarabine; Cytosine arabinoside; Cytosine-1-beta-D-arabinofuranoside; Ara-C	C9H13N3O5
Com_314_pos	Cycloleucine	cpd:C03969	1-Aminocyclopentanecarboxylate; 1-Aminocyclopentanecarboxylic acid; Cycloleucine	C6H11NO2
Com_165_neg	UDP	cpd:C00015	UDP; Uridine 5'-diphosphate	C9H14N2O12P2	map00240 Pyrimidine metabolism;map01100 Metabolic pathways;map04080 Neuroactive ligand-receptor interaction
Com_213_neg	Traumatic acid	cpd:C16308	Traumatic acid; (2E)-Dodecenedioic acid; Dodec-2-enedioic acid	C12H20O4	map00592 alpha-Linolenic acid metabolism
Com_618_pos	Isonicotinamide	cpd:C02421	Isonicotineamide; Isonicotinamide	C6H6N2O
Com_141_neg	Taurocholic acid	cpd:C05122	Taurocholate; Taurocholic acid; Cholyltaurine	C26H45NO7S	map00120 Primary bile acid biosynthesis;map00430 Taurine and hypotaurine metabolism;map01100 Metabolic pathways
Com_273_neg	Myristic acid	cpd:C06424	Tetradecanoic acid; Tetradecanoate; Myristic acid	C14H28O2	map00061 Fatty acid biosynthesis;map01100 Metabolic pathways
Com_345_pos	Flavin Adenine Dinucleotide	cpd:C00016	FAD; Flavin adenine dinucleotide	C27H33N9O15P2	map00740 Riboflavin metabolism;map01100 Metabolic pathways
Com_244_neg	UDP-D-glucuronate	cpd:C00167	UDP-glucuronate; UDPglucuronate; UDP-D-glucuronate; UDP-alpha-D-glucuronate	C15H22N2O18P2	map00040 Pentose and glucuronate interconversions;map00053 Ascorbate and aldarate metabolism;map00520 Amino sugar and nucleotide sugar metabolism;map01100 Metabolic pathways
Com_348_pos	7,8-Dihydrofolate	cpd:C00415	Dihydrofolate; Dihydrofolic acid; 7,8-Dihydrofolate; 7,8-Dihydrofolic acid; 7,8-Dihydropteroylglutamate	C19H21N7O6	map00670 One carbon pool by folate;map00790 Folate biosynthesis;map01100 Metabolic pathways
Com_530_pos	Oxymetazoline	cpd:C07363	Oxymetazoline; Afrin	C16H24N2O
Com_526_pos	Cyprodinil	cpd:C10914	Cyprodinil	C14H15N3
Com_70_neg	CTP	cpd:C00063	CTP; Cytidine 5'-triphosphate; Cytidine triphosphate	C9H16N3O14P3	map00240 Pyrimidine metabolism;map00515 Mannose type O-glycan biosynthesis;map01100 Metabolic pathways
Com_126_neg	Diflunisal	cpd:C01691	Diflunisal	C13H8F2O3
Com_545_pos	L-Leucine	cpd:C00123	L-Leucine; 2-Amino-4-methylvaleric acid; (2S)-alpha-2-Amino-4-methylvaleric acid; (2S)-alpha-Leucine	C6H13NO2	map00280 Valine, leucine and isoleucine degradation;map00290 Valine, leucine and isoleucine biosynthesis;map00970 Aminoacyl-tRNA biosynthesis;map01100 Metabolic pathways;map01210 2-Oxocarboxylic acid metabolism;map01230 Biosynthesis of amino acids;map02010 ABC transporters;map04150 mTOR signaling pathway
Com_676_pos	3-Guanidinopropanoate	cpd:C03065	3-Guanidinopropanoate; Guanidinopropionic acid	C4H9N3O2
Com_617_pos	Pipecolinic Acid	cpd:C00408	L-Pipecolate; Pipecolinic acid; Pipecolic acid; 2-Piperidinecarboxylic acid; (S)-Piperidine-2-carboxylic acid	C6H11NO2	map00310 Lysine degradation;map01100 Metabolic pathways
Com_66_neg	D-Glucuronic acid	cpd:C16245	D-Glucuronic acid	C6H10O7
Com_55_neg	Isolithocholic acid	cpd:C17658	Isolithocholate; Isolithocholic acid; beta-Lithocholic acid; beta-Lithocholanic acid; 3-Epilithocholic acid; 3beta-Hydroxy-5beta-cholan-24-oic acid; 3beta-Hydroxy-5beta-cholan-24-oic acid	C24H40O3
Com_395_pos	Adenosine	cpd:C00212	Adenosine	C10H13N5O4	map00230 Purine metabolism;map01100 Metabolic pathways;map04080 Neuroactive ligand-receptor interaction;map04270 Vascular smooth muscle contraction
Com_460_pos	Vidarabine	cpd:C07195	Vidarabine; 9-beta-D-Arabino furanosyl adenine monohydrate	C10H13N5O4. H2O
Com_85_neg	D-Xylonate	cpd:C00502	D-Xylonate	C5H10O6	map00040 Pentose and glucuronate interconversions
Com_476_pos	Pyridoxine	cpd:C00314	Pyridoxine; Pyridoxol	C8H11NO3	map00750 Vitamin B6 metabolism;map01100 Metabolic pathways
Com_343_pos	gamma-Muurolene	cpd:C20273	gamma-Muurolene; (+)-gamma-Muurolene	C15H24
Com_370_pos	Imidazoleacetic acid	cpd:C02835	Imidazole-4-acetate; Imidazoleacetic acid; 4-Imidazoleacetate	C5H6N2O2	map00340 Histidine metabolism
Com_435_pos	XMP	cpd:C00655	Xanthosine 5'-phosphate; Xanthylic acid; XMP; (9-D-Ribosylxanthine)-5'-phosphate	C10H13N4O9P	map00230 Purine metabolism;map01100 Metabolic pathways
Com_257_neg	L-Ascorbate	cpd:C00072	Ascorbate; Ascorbic acid; L-Ascorbate; L-Ascorbic acid; Vitamin C	C6H8O6	map00053 Ascorbate and aldarate metabolism;map00480 Glutathione metabolism;map01100 Metabolic pathways
Com_50_neg	ADP-ribose	cpd:C00301	ADP-ribose; ADP-D-ribose; Adenosine diphosphate ribose	C15H23N5O14P2	map00230 Purine metabolism
Com_118_neg	Prostaglandin G2	cpd:C05956	Prostaglandin G2; PGG2	C20H32O6	map00590 Arachidonic acid metabolism;map01100 Metabolic pathways
Com_164_neg	D-Glucarate	cpd:C00818	D-Glucarate; D-Glucaric acid; L-Gularic acid; D-Saccharic acid; D-Glucosaccharic acid; Glucaric acid; Glucarate	C6H10O8	map00053 Ascorbate and aldarate metabolism;map01100 Metabolic pathways
Com_459_pos	Furfural	cpd:C14279	Furfural; 2-Furaldehyde	C5H4O2
Com_45_neg	cis-4-Hydroxy-D-proline	cpd:C03440	cis-4-Hydroxy-D-proline	C5H9NO3	map00330 Arginine and proline metabolism
Com_451_pos	Inosine	cpd:C00294	Inosine	C10H12N4O5	map00230 Purine metabolism;map01100 Metabolic pathways
Com_77_neg	3'-Dephospho-CoA	cpd:C00882	Dephospho-CoA; Dephosphocoenzyme A; 3'-Dephospho-CoA	C21H35N7O13P2S	map00770 Pantothenate and CoA biosynthesis;map01100 Metabolic pathways
Com_416_pos	Carnosine	cpd:C00386	Carnosine; Nalpha-(beta-alanyl)-L-histidine	C9H14N4O3	map00340 Histidine metabolism;map00410 beta-Alanine metabolism;map01100 Metabolic pathways
Com_392_pos	5-Hydroxyindoleacetate	cpd:C05635	5-Hydroxyindoleacetate	C10H9NO3	map00380 Tryptophan metabolism;map01100 Metabolic pathways
Com_293_neg	IDP	cpd:C00104	IDP; Inosine 5'-diphosphate; Inosine diphosphate	C10H14N4O11P2	map00230 Purine metabolism
Com_73_neg	Phosphocreatine	cpd:C02305	Phosphocreatine; N-Phosphocreatine; Creatine phosphate	C4H10N3O5P	map00330 Arginine and proline metabolism;map01100 Metabolic pathways
Com_292_neg	Hydroxypyruvic acid	cpd:C00168	Hydroxypyruvate; Hydroxypyruvic acid; 3-Hydroxypyruvate; 3-Hydroxypyruvic acid	C3H4O4	map00260 Glycine, serine and threonine metabolism;map00630 Glyoxylate and dicarboxylate metabolism;map01100 Metabolic pathways;map01200 Carbon metabolism
Com_128_neg	Hydroxyhydroquinone	cpd:C02814	Benzene-1,2,4-triol; Hydroxyhydroquinone; 1,2,4-Benzenetriol; 1,2,4-Trihydroxybenzene; Hydroxyquinol	C6H6O3	map01100 Metabolic pathways
Com_620_pos	1,3-Diaminopropane	cpd:C00986	1,3-Diaminopropane; Trimethylenediamine; 1,3-Propanediamine; Propane-1,3-diamine	C3H10N2	map00260 Glycine, serine and threonine metabolism;map00330 Arginine and proline metabolism;map00410 beta-Alanine metabolism
Com_603_pos	Thiamine	cpd:C00378	Thiamine; Thiamin; Vitamin B1; Aneurin; Antiberiberi factor	C12H17N4OS	map00730 Thiamine metabolism;map01100 Metabolic pathways;map02010 ABC transporters;map04122 Sulfur relay system
Com_240_neg	4-Nitrophenol	cpd:C00870	4-Nitrophenol; p-Nitrophenol; PNP; Niphen; 4-Hydroxynitrobenzene	C6H5NO3
Com_653_pos	L-Aspartic acid	cpd:C00049	L-Aspartate; L-Aspartic acid; 2-Aminosuccinic acid; L-Asp	C4H7NO4	map00220 Arginine biosynthesis;map00250 Alanine, aspartate and glutamate metabolism;map00260 Glycine, serine and threonine metabolism;map00270 Cysteine and methionine metabolism;map00340 Histidine metabolism;map00410 beta-Alanine metabolism;map00760 Nicotinate and nicotinamide metabolism;map00770 Pantothenate and CoA biosynthesis;map00970 Aminoacyl-tRNA biosynthesis;map01100 Metabolic pathways
Com_252_neg	Cyclohexylsulfamate	cpd:C02824	Cyclohexylsulfamate; Cyclohexylsulfamic acid; Cylamic acid; Cyclohexylamide sulfate	C6H13NO3S
Com_386_pos	L-Hydroxyproline	cpd:C01157	Hydroxyproline; L-Hydroxyproline; trans-4-Hydroxy-L-proline	C5H9NO3	map00330 Arginine and proline metabolism;map01100 Metabolic pathways
Com_504_pos	Serotonin	cpd:C00780	Serotonin; 3-(2-Aminoethyl)-1H-indol-5-ol; 5-Hydroxytryptamine; Enteramine	C10H12N2O	map00380 Tryptophan metabolism;map01100 Metabolic pathways;map04080 Neuroactive ligand-receptor interaction;map04540 Gap junction
Com_245_neg	UDP-galactose	cpd:C00052	UDP-alpha-D-galactose; UDP-D-galactose; UDP-galactose; UDP-D-galactopyranose; UDP-alpha-D-galactopyranose	C15H24N2O17P2	map00052 Galactose metabolism;map00520 Amino sugar and nucleotide sugar metabolism;map01100 Metabolic pathways
Com_593_pos	Spermine	cpd:C00750	Spermine; N,N'-Bis(3-aminopropyl)-1,4-butanediamine	C10H26N4	map00330 Arginine and proline metabolism;map00410 beta-Alanine metabolism;map00480 Glutathione metabolism;map01100 Metabolic pathways
Com_134_neg	5-Phosphoribosyl 1-pyrophosphate	cpd:C00119	5-Phospho-alpha-D-ribose 1-diphosphate; 5-Phosphoribosyl diphosphate; 5-Phosphoribosyl 1-pyrophosphate; PRPP	C5H13O14P3	map00030 Pentose phosphate pathway;map00230 Purine metabolism;map00240 Pyrimidine metabolism;map00340 Histidine metabolism;map00400 Phenylalanine, tyrosine and tryptophan biosynthesis;map00790 Folate biosynthesis;map01100 Metabolic pathways;map01200 Carbon metabolism;map01230 Biosynthesis of amino acids
Com_403_pos	Nandrolone	cpd:C07254	Nandrolone	C18H26O2
Com_569_pos	2,6-Dimethylaniline	cpd:C11004	2,6-Dimethylaniline; 2,6-DMA; 2,6-Xylidine	C8H11N	map00982 Drug metabolism - cytochrome P450
Com_53_neg	2-C-Methyl-D-erythritol 2,4-cyclodiphosphate	cpd:C11453	2-C-Methyl-D-erythritol 2,4-cyclodiphosphate; 3-Methyl-1,2,3,4-tetrahydroxybutane-1,3-cyclic bisphosphate	C5H12O9P2	map00900 Terpenoid backbone biosynthesis;map01100 Metabolic pathways
Com_162_neg	D-Galactonic acid	cpd:C00880	D-Galactonate; D-Galactonic acid	C6H12O7	map00052 Galactose metabolism;map01100 Metabolic pathways
Com_297_neg	Glycerol-3-phosphate	cpd:C03189	DL-Glycerol 1-phosphate; Glycerol 1-phosphate; Glycerol-3-phosphate; rac-Glycerol 1-phosphate; DL-Glyceryl 1-phosphate; DL-Glycerol 3-phosphate	C3H9O6P
Com_80_neg	D-Lactic acid	cpd:C00256	(R)-Lactate; D-Lactate; D-Lactic acid; D-2-Hydroxypropanoic acid; D-2-Hydroxypropionic acid	C3H6O3	map00620 Pyruvate metabolism
Com_226_neg	Adenosine 5'-Diphosphate	cpd:C00008	ADP; Adenosine 5'-diphosphate	C10H15N5O10P2	map00190 Oxidative phosphorylation;map00230 Purine metabolism;map01100 Metabolic pathways;map04068 FoxO signaling pathway;map04080 Neuroactive ligand-receptor interaction;map04142 Lysosome
Com_181_neg	Hydroquinone	cpd:C15603	Hydroquinone; p-Hydroquinone; Quinol; Reduced quinone	-
Com_30_neg	Nonadecanoic acid	cpd:C16535	Nonadecanoic acid; Nonadecylic acid	C19H38O2
Com_243_neg	N-Methylhydantoin	cpd:C02565	N-Methylhydantoin; N-Methylimidazolidine-2,4-dione	C4H6N2O2	map00330 Arginine and proline metabolism;map01100 Metabolic pathways
Com_485_pos	3-Aminoisobutyric acid	cpd:C05145	3-Aminoisobutyric acid; 3-Aminoisobutanoate; 3-Amino-2-methylpropanoate	C4H9NO2
Com_127_neg	Hexadecanedioate	cpd:C19615	Hexadecanedioate	C16H30O4	map01100 Metabolic pathways
Com_474_pos	Noradrenaline	cpd:C00547	L-Noradrenaline; Noradrenaline; Norepinephrine; Arterenol; 4-[(1R)-2-Amino-1-hydroxyethyl]-1,2-benzenediol	C8H11NO3	map00350 Tyrosine metabolism;map01100 Metabolic pathways;map04080 Neuroactive ligand-receptor interaction;map04261 Adrenergic signaling in cardiomyocytes;map04270 Vascular smooth muscle contraction;map04540 Gap junction
Com_678_pos	3'-Adenylic acid	cpd:C01367	3'-AMP; 3'-Adenylic acid; 3'-Adenosine monophosphate; Adenosine-3'-monophosphate; Adenosine 3'-phosphate; AMP 3'-phosphate	C10H14N5O7P	map00230 Purine metabolism
Com_575_pos	L-Saccharopine	cpd:C00449	N6-(L-1,3-Dicarboxypropyl)-L-lysine; Saccharopine; L-Saccharopine; N-[(S)-5-Amino-5-carboxypentyl]-L-glutamic acid	C11H20N2O6	map00310 Lysine degradation;map01100 Metabolic pathways;map01230 Biosynthesis of amino acids
Com_189_neg	Citric acid	cpd:C00158	Citrate; Citric acid; 2-Hydroxy-1,2,3-propanetricarboxylic acid; 2-Hydroxytricarballylic acid	C6H8O7	map00020 Citrate cycle (TCA cycle);map00250 Alanine, aspartate and glutamate metabolism;map00630 Glyoxylate and dicarboxylate metabolism;map01100 Metabolic pathways;map01200 Carbon metabolism;map01210 2-Oxocarboxylic acid metabolism;map01230 Biosynthesis of amino acids
Com_463_pos	1-Methylxanthine	cpd:C16358	1-Methylxanthine	C6H6N4O2	map00232 Caffeine metabolism;map01100 Metabolic pathways
Com_449_pos	Thioguanine	cpd:C07648	Thioguanine	C5H5N5S	map00983 Drug metabolism - other enzymes
Com_148_neg	TPP	cpd:C00068	Thiamin diphosphate; Thiamine diphosphate; Thiamin pyrophosphate; TPP; ThPP	C12H19N4O7P2S	map00010 Glycolysis / Gluconeogenesis;map00020 Citrate cycle (TCA cycle);map00280 Valine, leucine and isoleucine degradation;map00620 Pyruvate metabolism;map00640 Propanoate metabolism;map00730 Thiamine metabolism;map01100 Metabolic pathways
Com_6_neg	12(S)-HETE	cpd:C14777	12(S)-HETE; (5Z,8Z,10E,14Z)-(12S)-12-Hydroxyeicosa-5,8,10,14-tetraenoic acid; (5Z,8Z,10E,14Z)-(12S)-12-Hydroxyicosa-5,8,10,14-tetraenoic acid	C20H32O3	map00590 Arachidonic acid metabolism
Com_582_pos	Stachydrine	cpd:C10172	Stachydrine; Proline betaine; L-Proline betaine	C7H13NO2
Com_13_neg	Deoxyguanosine	cpd:C00330	Deoxyguanosine; 2'-Deoxyguanosine	C10H13N5O4	map00230 Purine metabolism;map01100 Metabolic pathways
Com_42_neg	ATP	cpd:C00002	ATP; Adenosine 5'-triphosphate	C10H16N5O13P3	map00190 Oxidative phosphorylation;map00230 Purine metabolism;map01100 Metabolic pathways;map04020 Calcium signaling pathway;map04080 Neuroactive ligand-receptor interaction;map04142 Lysosome;map04217 Necroptosis;map04621 NOD-like receptor signaling pathway
Com_598_pos	Quinone	cpd:C15602	Quinone	-
Com_233_neg	Deoxycytidine	cpd:C00881	Deoxycytidine; 2'-Deoxycytidine	C9H13N3O4	map00240 Pyrimidine metabolism
Com_633_pos	Porphobilinogen	cpd:C00931	Porphobilinogen	C10H14N2O4	map00860 Porphyrin and chlorophyll metabolism;map01100 Metabolic pathways
Com_116_neg	Pyruvic Acid	cpd:C00022	Pyruvate; Pyruvic acid; 2-Oxopropanoate; 2-Oxopropanoic acid; Pyroracemic acid	C3H4O3	map00010 Glycolysis / Gluconeogenesis;map00020 Citrate cycle (TCA cycle);map00030 Pentose phosphate pathway;map00040 Pentose and glucuronate interconversions;map00053 Ascorbate and aldarate metabolism;map00250 Alanine, aspartate and glutamate metabolism;map00260 Glycine, serine and threonine metabolism;map00270 Cysteine and methionine metabolism;map00290 Valine, leucine and isoleucine biosynthesi…
Com_171_neg	N-Acetyl-D-glucosamine	cpd:C00140	N-Acetyl-D-glucosamine; N-Acetylchitosamine; 2-Acetamido-2-deoxy-D-glucose; GlcNAc	C8H15NO6	map00520 Amino sugar and nucleotide sugar metabolism;map01100 Metabolic pathways;map02010 ABC transporters
Com_93_neg	Sebacic acid	cpd:C08277	Sebacic acid; Decanedioic acid	C10H18O4
Com_183_neg	L-Arabinose	cpd:C00259	L-Arabinose; L-Arabinopyranose	C5H10O5	map00040 Pentose and glucuronate interconversions;map00053 Ascorbate and aldarate metabolism;map00520 Amino sugar and nucleotide sugar metabolism;map01100 Metabolic pathways;map02010 ABC transporters
Com_242_neg	CDP	cpd:C00112	CDP; Cytidine 5'-diphosphate; Cytidine diphosphate	C9H15N3O11P2	map00240 Pyrimidine metabolism;map01100 Metabolic pathways
Com_493_pos	Trimethylamine N-oxide	cpd:C01104	Trimethylamine N-oxide; (CH3)3NO	C3H9NO
Com_209_neg	dADP	cpd:C00206	dADP; 2'-Deoxyadenosine 5'-diphosphate	C10H15N5O9P2	map00230 Purine metabolism;map01100 Metabolic pathways
Com_220_neg	gamma-Linolenic acid	cpd:C06426	(6Z,9Z,12Z)-Octadecatrienoic acid; 6,9,12-Octadecatrienoic acid; gamma-Linolenic acid; Gamolenic acid	C18H30O2	map00591 Linoleic acid metabolism;map01040 Biosynthesis of unsaturated fatty acids;map01100 Metabolic pathways
Com_76_neg	Stearic acid	cpd:C01530	Octadecanoic acid; Stearate; Stearic acid	C18H36O2	map00061 Fatty acid biosynthesis;map01040 Biosynthesis of unsaturated fatty acids
Com_423_pos	1,4-Naphthoquinone	cpd:C02617	1,4-Naphthoquinone; 1,4-Naphthalenedione	C10H6O2	map00980 Metabolism of xenobiotics by cytochrome P450
Com_36_neg	Phosphonotyrosine	cpd:C06501	Phosphotyrosine; Phosphonotyrosine	C9H12NO6P
Com_175_neg	2-Hydroxybutanoic acid	cpd:C05984	2-Hydroxybutanoic acid; 2-Hydroxybutyrate; 2-Hydroxybutyric acid	C4H8O3	map00640 Propanoate metabolism
Com_181_neg	Hydroquinone	cpd:C00530	Hydroquinone; p-Benzenediol; 1,4-Benzenediol; 1,4-Dihydroxybenzene; Benzene-1,4-diol; Quinol; 4-Hydroxyphenol	C6H6O2	map00350 Tyrosine metabolism;map01100 Metabolic pathways
Com_32_neg	D-Ribose	cpd:C00121	D-Ribose	C5H10O5	map00030 Pentose phosphate pathway;map02010 ABC transporters
Com_548_pos	L-Ornithine	cpd:C00077	L-Ornithine; (S)-2,5-Diaminovaleric acid; (S)-2,5-Diaminopentanoic acid; (S)-2,5-Diaminopentanoate	C5H12N2O2	map00220 Arginine biosynthesis;map00330 Arginine and proline metabolism;map00472 D-Arginine and D-ornithine metabolism;map00480 Glutathione metabolism;map01100 Metabolic pathways;map01210 2-Oxocarboxylic acid metabolism;map01230 Biosynthesis of amino acids;map02010 ABC transporters
Com_234_neg	UDP-D-glucose	cpd:C00029	UDP-glucose; UDPglucose; UDP-D-glucose; Uridine diphosphate glucose; UDP-alpha-D-glucose	C15H24N2O17P2	map00040 Pentose and glucuronate interconversions;map00052 Galactose metabolism;map00053 Ascorbate and aldarate metabolism;map00240 Pyrimidine metabolism;map00500 Starch and sucrose metabolism;map00520 Amino sugar and nucleotide sugar metabolism;map00524 Neomycin, kanamycin and gentamicin biosynthesis;map00561 Glycerolipid metabolism;map01100 Metabolic pathways
Com_609_pos	thiamine phosphate	cpd:C01081	Thiamin monophosphate; Thiamine monophosphate; Thiamin phosphate; Thiamine phosphate; TMP	C12H18N4O4PS	map00730 Thiamine metabolism;map01100 Metabolic pathways
Com_158_neg	Ribose 1-phosphate	cpd:C00620	alpha-D-Ribose 1-phosphate; Ribose 1-phosphate; D-Ribose 1-phosphate	C5H11O8P	map00030 Pentose phosphate pathway;map00230 Purine metabolism
Com_347_pos	Oxidized glutathione	cpd:C00127	Glutathione disulfide; GSSG; Oxiglutatione; Oxidized glutathione	C20H32N6O12S2	map00480 Glutathione metabolism;map04216 Ferroptosis
Com_380_pos	11-Ketoetiocholanolone	cpd:C14552	11-Ketoetiocholanolone; 3alpha-Hydroxy-5beta-androstane-11,17-dione	C19H28O3
Com_330_pos	2-Aminoethylphosphonate	cpd:C03557	2-Aminoethylphosphonate; (2-Aminoethyl)phosphonate; Ciliatine	C2H8NO3P	map00440 Phosphonate and phosphinate metabolism;map01100 Metabolic pathways;map02010 ABC transporters
Com_489_pos	1-Aminocyclopropane-1-carboxylic acid	cpd:C01234	1-Aminocyclopropane-1-carboxylate; 1-Aminocyclopropane-1-carboxylic acid	C4H7NO2	map00270 Cysteine and methionine metabolism;map01100 Metabolic pathways
Com_501_pos	UDP-N-acetylglucosamine	cpd:C00043	UDP-N-acetyl-alpha-D-glucosamine; UDP-N-acetyl-D-glucosamine; UDP-N-acetylglucosamine	C17H27N3O17P2	map00520 Amino sugar and nucleotide sugar metabolism;map00524 Neomycin, kanamycin and gentamicin biosynthesis;map01100 Metabolic pathways
Com_217_neg	Inositol	cpd:C00137	myo-Inositol; D-myo-Inositol; 1D-myo-Inositol; L-myo-Inositol; 1L-myo-Inositol; meso-Inositol; Inositol; Dambose; Cyclohexitol; Meat sugar; Bios I	C6H12O6	map00052 Galactose metabolism;map00053 Ascorbate and aldarate metabolism;map00562 Inositol phosphate metabolism;map01100 Metabolic pathways;map02010 ABC transporters;map04070 Phosphatidylinositol signaling system
Com_513_pos	L-Hydroxylysine	cpd:C16741	L-Hydroxylysine; 5-Hydroxy-L-lysine; L-erythro-5-Hydroxylysine; (5R)-5-Hydroxy-L-lysine	C6H14N2O3	map00310 Lysine degradation;map01100 Metabolic pathways
Com_197_neg	L-Cysteinesulfinic acid	cpd:C00606	3-Sulfino-L-alanine; L-Cysteinesulfinic acid; 3-Sulphino-L-alanine; 3-Sulfinoalanine	C3H7NO4S	map00270 Cysteine and methionine metabolism;map00430 Taurine and hypotaurine metabolism;map01100 Metabolic pathways
Com_131_neg	4-Pyridoxic acid	cpd:C00847	4-Pyridoxate; 4-Pyridoxic acid	C8H9NO4	map00750 Vitamin B6 metabolism;map01100 Metabolic pathways
Com_173_neg	N-Acetyl-L-methionine	cpd:C02712	N-Acetylmethionine; N-Acetyl-L-methionine	C7H13NO3S
Com_332_pos	2-Hydroxycinnamate	cpd:C01772	trans-2-Hydroxycinnamate; trans-2-Hydroxycinnamic acid; 2-Hydroxycinnamate; 2-Coumaric acid; o-Coumaric acid; 2-Coumarate	C9H8O3	map00360 Phenylalanine metabolism
Com_437_pos	Dimethyl phthalate	cpd:C11233	Dimethyl phthalate	C10H10O4
Com_561_pos	2-Deoxy-D-galactose	cpd:C02781	2-Deoxy-D-galactose	C6H12O5
Com_136_neg	Galactaric acid	cpd:C00879	D-Galactarate; D-Mucic acid; D-Galactaric acid; Galactaric acid; Galactarate; Mucic acid	C6H10O8	map00053 Ascorbate and aldarate metabolism
Com_667_pos	5'-Deoxy-5'-(methylthio)adenosine	cpd:C00170	5'-Methylthioadenosine; Methylthioadenosine; S-Methyl-5'-thioadenosine; 5-Methylthioadenosine; 5'-Deoxy-5'-(methylthio)adenosine; Thiomethyladenosine; MTA	C11H15N5O3S	map00270 Cysteine and methionine metabolism;map01100 Metabolic pathways
Com_20_neg	3-Hydroxypropanoic acid	cpd:C01013	3-Hydroxypropanoate; 3-Hydroxypropanoic acid; 3-Hydroxypropionate; 3-Hydroxypropionic acid; Hydracrylic acid	C3H6O3	map00240 Pyrimidine metabolism;map00410 beta-Alanine metabolism;map00640 Propanoate metabolism;map01100 Metabolic pathways;map01200 Carbon metabolism
Com_260_neg	4-Hydroxybenzoic acid	cpd:C00156	4-Hydroxybenzoate; Hydroxybenzoic acid; 4-Hydroxybenzoic acid; Hydroxybenzenecarboxylic acid	C7H6O3	map00130 Ubiquinone and other terpenoid-quinone biosynthesis;map00360 Phenylalanine metabolism;map00790 Folate biosynthesis;map01100 Metabolic pathways
Com_597_pos	11-cis-Retinol	cpd:C00899	11-cis-Retinol	C20H30O	map00830 Retinol metabolism
Com_658_pos	4-Aminobutyric acid	cpd:C00334	4-Aminobutanoate; 4-Aminobutanoic acid; 4-Aminobutyrate; 4-Aminobutyric acid; gamma-Aminobutyric acid; GABA	C4H9NO2	map00250 Alanine, aspartate and glutamate metabolism;map00330 Arginine and proline metabolism;map00410 beta-Alanine metabolism;map00650 Butanoate metabolism;map00760 Nicotinate and nicotinamide metabolism;map01100 Metabolic pathways;map04080 Neuroactive ligand-receptor interaction
Com_394_pos	Uridine	cpd:C00299	Uridine	C9H12N2O6	map00240 Pyrimidine metabolism;map01100 Metabolic pathways
Com_336_pos	S-Methyl-5'-thioadenosine	cpd:C00170	5'-Methylthioadenosine; Methylthioadenosine; S-Methyl-5'-thioadenosine; 5-Methylthioadenosine; 5'-Deoxy-5'-(methylthio)adenosine; Thiomethyladenosine; MTA	C11H15N5O3S	map00270 Cysteine and methionine metabolism;map01100 Metabolic pathways
Com_323_pos	Dehydrocholic acid	cpd:C13154	Dehydrocholic acid; 3,7,12-Triketo-5beta-cholanoic acid	C24H34O5
Com_594_pos	Histamine	cpd:C00388	Histamine; 1H-Imidazole-4-ethanamine; 2-(4-Imidazolyl)ethylamine	C5H9N3	map00340 Histidine metabolism;map01100 Metabolic pathways;map04080 Neuroactive ligand-receptor interaction
Com_444_pos	Ergosterol	cpd:C01694	Ergosterol; Provitamin D2	C28H44O	map00100 Steroid biosynthesis;map01100 Metabolic pathways
Com_324_pos	Uracil	cpd:C00106	Uracil	C4H4N2O2	map00240 Pyrimidine metabolism;map00410 beta-Alanine metabolism;map00770 Pantothenate and CoA biosynthesis;map01100 Metabolic pathways
Com_219_neg	Linoleic acid	cpd:C01595	Linoleate; Linoleic acid; (9Z,12Z)-Octadecadienoic acid; 9-cis,12-cis-Octadecadienoate; 9-cis,12-cis-Octadecadienoic acid	C18H32O2	map00591 Linoleic acid metabolism;map01040 Biosynthesis of unsaturated fatty acids;map01100 Metabolic pathways
Com_562_pos	dAMP	cpd:C00360	dAMP; 2'-Deoxyadenosine 5'-phosphate; 2'-Deoxyadenosine 5'-monophosphate; Deoxyadenylic acid; Deoxyadenosine monophosphate	C10H14N5O6P	map00230 Purine metabolism;map01100 Metabolic pathways
Com_110_neg	Cytosine	cpd:C00380	Cytosine	C4H5N3O	map00240 Pyrimidine metabolism;map01100 Metabolic pathways
Com_464_pos	Picolinic acid	cpd:C10164	Picolinic acid; 2-Pyridinecarboxylic acid	C6H5NO2	map00380 Tryptophan metabolism;map01100 Metabolic pathways
Com_413_pos	D-Ala-D-Ala	cpd:C00993	D-Alanyl-D-alanine; D-Ala-D-Ala	C6H12N2O3	map01100 Metabolic pathways
Com_320_pos	Cadaverine	cpd:C01672	Cadaverine; 1,5-Pentanediamine; 1,5-Diaminopentane; Pentamethylenediamine	C5H14N2	map00310 Lysine degradation;map00480 Glutathione metabolism;map01100 Metabolic pathways
Com_283_neg	Lactose	cpd:C00243	Lactose; 1-beta-D-Galactopyranosyl-4-D-glucopyranose; beta-D-Gal-(1->4)-D-Glc; Milk sugar	C12H22O11	map00052 Galactose metabolism;map01100 Metabolic pathways;map02010 ABC transporters
Com_270_neg	lithocholic acid	cpd:C03990	Lithocholic acid; Lithocholate; 3alpha-Hydroxy-5beta-cholanate; 3alpha-Hydroxy-5beta-cholanic acid	C24H40O3
Com_544_pos	L-Citrulline	cpd:C00327	L-Citrulline; 2-Amino-5-ureidovaleric acid; Citrulline	C6H13N3O3	map00220 Arginine biosynthesis;map01100 Metabolic pathways;map01230 Biosynthesis of amino acids
Com_417_pos	N-Acetyl-L-glutamic acid	cpd:C00624	N-Acetyl-L-glutamate; N-Acetyl-L-glutamic acid	C7H11NO5	map00220 Arginine biosynthesis;map01100 Metabolic pathways;map01210 2-Oxocarboxylic acid metabolism;map01230 Biosynthesis of amino acids
Com_145_neg	dTMP	cpd:C00364	dTMP; Thymidine 5'-phosphate; Deoxythymidine 5'-phosphate; Thymidylic acid; 5'-Thymidylic acid; Thymidine monophosphate; Deoxythymidylic acid; Thymidylate	C10H15N2O8P	map00240 Pyrimidine metabolism;map01100 Metabolic pathways
Com_543_pos	Creatinine	cpd:C00791	Creatinine; 1-Methylglycocyamidine	C4H7N3O	map00330 Arginine and proline metabolism;map01100 Metabolic pathways
Com_359_pos	Vitamin B2	cpd:C00255	Riboflavin; Lactoflavin; 7,8-Dimethyl-10-ribitylisoalloxazine; Vitamin B2	C17H20N4O6	map00740 Riboflavin metabolism;map01100 Metabolic pathways
Com_436_pos	Tyramine	cpd:C00483	Tyramine; 2-(p-Hydroxyphenyl)ethylamine	C8H11NO	map00350 Tyrosine metabolism;map04080 Neuroactive ligand-receptor interaction
Com_172_neg	2-Hydroxybutyric acid	cpd:C05984	2-Hydroxybutanoic acid; 2-Hydroxybutyrate; 2-Hydroxybutyric acid	C4H8O3	map00640 Propanoate metabolism
Com_231_neg	D-Fructose 6-phosphate	cpd:C00085	D-Fructose 6-phosphate; D-Fructose 6-phosphoric acid; Neuberg ester	C6H13O9P	map00052 Galactose metabolism;map00500 Starch and sucrose metabolism;map01100 Metabolic pathways;map01200 Carbon metabolism
Com_125_neg	Glucotropaeolin	cpd:C02153	Glucotropaeolin; Glucotropeolin; Benzyl glucosinolate	C14H19NO9S2	map01210 2-Oxocarboxylic acid metabolism
Com_75_neg	D-threo-Isocitric acid	cpd:C00451	(1R,2S)-1-Hydroxypropane-1,2,3-tricarboxylate; D-threo-Isocitric acid	C6H8O7
Com_331_pos	6-Methylmercaptopurine	cpd:C16614	6-Methylmercaptopurine; Thiopurine S-methylether	C6H6N4S	map00983 Drug metabolism - other enzymes
Com_568_pos	Hypotaurine	cpd:C00519	Hypotaurine; 2-Aminoethanesulfinic acid	C2H7NO2S	map00430 Taurine and hypotaurine metabolism;map01100 Metabolic pathways
Com_606_pos	Metformin	cpd:C07151	Metformin	C4H11N5
Com_484_pos	Methionine	cpd:C00073	L-Methionine; Methionine; L-2-Amino-4methylthiobutyric acid	C5H11NO2S	map00270 Cysteine and methionine metabolism;map00970 Aminoacyl-tRNA biosynthesis;map01100 Metabolic pathways;map01210 2-Oxocarboxylic acid metabolism;map01230 Biosynthesis of amino acids
Com_166_neg	D-Erythrose 4-phosphate	cpd:C00279	D-Erythrose 4-phosphate	C4H9O7P	map00030 Pentose phosphate pathway;map00400 Phenylalanine, tyrosine and tryptophan biosynthesis;map00750 Vitamin B6 metabolism;map01100 Metabolic pathways;map01200 Carbon metabolism;map01230 Biosynthesis of amino acids
Com_636_pos	5-Methyl-2'-deoxycytidine	cpd:C03592	5-Methyl-2'-deoxycytidine	C10H15N3O4
Com_138_neg	Pimelic acid	cpd:C02656	Pimelate; Pimelic acid; Heptanedioic acid; 6-Carboxyhexanoate	C7H12O4	map00780 Biotin metabolism;map01100 Metabolic pathways
Com_565_pos	L-2-Aminoadipic acid	cpd:C00956	L-2-Aminoadipate; L-alpha-Aminoadipate; L-alpha-Aminoadipic acid; L-2-Aminoadipic acid; L-2-Aminohexanedioate	C6H11NO4	map00310 Lysine degradation;map01100 Metabolic pathways;map01210 2-Oxocarboxylic acid metabolism;map01230 Biosynthesis of amino acids
Com_491_pos	Betaine	cpd:C00719	Betaine; Trimethylaminoacetate; Glycine betaine; N,N,N-Trimethylglycine; Trimethylammonioacetate	C5H11NO2	map00260 Glycine, serine and threonine metabolism;map01100 Metabolic pathways;map02010 ABC transporters
Com_499_pos	L-Pipecolate	cpd:C00408	L-Pipecolate; Pipecolinic acid; Pipecolic acid; 2-Piperidinecarboxylic acid; (S)-Piperidine-2-carboxylic acid	C6H11NO2	map00310 Lysine degradation;map01100 Metabolic pathways
Com_192_neg	Fumaric acid	cpd:C00122	Fumarate; Fumaric acid; trans-Butenedioic acid	C4H4O4	map00020 Citrate cycle (TCA cycle);map00190 Oxidative phosphorylation;map00220 Arginine biosynthesis;map00250 Alanine, aspartate and glutamate metabolism;map00350 Tyrosine metabolism;map00360 Phenylalanine metabolism;map00620 Pyruvate metabolism;map00650 Butanoate metabolism;map00760 Nicotinate and nicotinamide metabolism;map01100 Metabolic pathways
Com_542_pos	isoleucine	cpd:C16434	Isoleucine	C6H13NO2
Com_3_neg	Indolelactate	cpd:C02043	Indolelactate	C11H11NO3	map00380 Tryptophan metabolism
Com_17_neg	Shikimic Acid	cpd:C00493	Shikimate; Shikimic acid; 3,4,5-Trihydroxy-1-cyclohexenecarboxylic acid	C7H10O5	map00400 Phenylalanine, tyrosine and tryptophan biosynthesis;map01100 Metabolic pathways;map01230 Biosynthesis of amino acids
Com_652_pos	L-Alanine	cpd:C00041	L-Alanine; L-2-Aminopropionic acid; L-alpha-Alanine	C3H7NO2	map00250 Alanine, aspartate and glutamate metabolism;map00270 Cysteine and methionine metabolism;map00430 Taurine and hypotaurine metabolism;map00450 Selenocompound metabolism;map00970 Aminoacyl-tRNA biosynthesis;map01100 Metabolic pathways;map01200 Carbon metabolism;map01230 Biosynthesis of amino acids;map02010 ABC transporters;map04122 Sulfur relay system
Com_580_pos	Oleamide	cpd:C19670	Oleamide; Oleyl amide; (Z)-9-Octadecenamide	C18H35NO
Com_115_neg	Prostaglandin I2	cpd:C01312	Prostaglandin I2; (5Z,13E)-(15S)-6,9alpha-Epoxy-11alpha,15-dihydroxyprosta-5,13-dienoate; Prostacyclin; PGI2; Epoprostenol	C20H32O5	map00590 Arachidonic acid metabolism;map01100 Metabolic pathways;map04080 Neuroactive ligand-receptor interaction;map04270 Vascular smooth muscle contraction;map04370 VEGF signaling pathway
Com_349_pos	6-Deoxy-D-glucose	cpd:C02522	6-Deoxy-D-glucose; D-Quinovose; D-Chinovose; D-Glucomethylose; Isorhamnose; D-Epifucose; Isorhodeose	C6H12O5
Com_334_pos	Isoquinoline	cpd:C06323	Isoquinoline; 2-Benzazine; Benzo[c]pyridine	C9H7N
Com_56_neg	D-Mannose 6-phosphate	cpd:C00275	D-Mannose 6-phosphate	C6H13O9P	map00051 Fructose and mannose metabolism;map00520 Amino sugar and nucleotide sugar metabolism;map01100 Metabolic pathways;map04142 Lysosome
Com_35_neg	2-Oxoadipic acid	cpd:C00322	2-Oxoadipate; 2-Oxoadipic acid	C6H8O5	map00310 Lysine degradation;map00380 Tryptophan metabolism;map01100 Metabolic pathways;map01210 2-Oxocarboxylic acid metabolism;map01230 Biosynthesis of amino acids
Com_206_neg	D-Glucosamine 6-phosphate	cpd:C00352	D-Glucosamine 6-phosphate; D-Glucosamine phosphate	C6H14NO8P	map00250 Alanine, aspartate and glutamate metabolism;map00520 Amino sugar and nucleotide sugar metabolism;map01100 Metabolic pathways
Com_372_pos	Isoproterenol	cpd:C07056	Isoproterenol; Isoprenaline	C11H17NO3	map04261 Adrenergic signaling in cardiomyocytes
Com_622_pos	Pyrrole-2-carboxylate	cpd:C05942	Pyrrole-2-carboxylate	C5H5NO2	map00330 Arginine and proline metabolism
Com_170_neg	Octanedioic acid	cpd:C08278	Suberic acid; Cork acid; 1,8-Octanedioic acid; Octanedioic acid; 1,6-Hexanedicarboxylic acid	C8H14O4
Com_255_neg	L-Adrenaline	cpd:C00788	L-Adrenaline; (R)-(-)-Adrenaline; (R)-(-)-Epinephrine; (R)-(-)-Epirenamine; (R)-(-)-Adnephrine; 4-[(1R)-1-Hydroxy-2-(methylamino)ethyl]-1,2-benzenediol	C9H13NO3	map00350 Tyrosine metabolism;map01100 Metabolic pathways;map04080 Neuroactive ligand-receptor interaction;map04261 Adrenergic signaling in cardiomyocytes
Com_68_neg	L-Malate	cpd:C00149	(S)-Malate; L-Malate; L-Apple acid; L-Malic acid; L-2-Hydroxybutanedioic acid; Malate; Malic acid	C4H6O5	map00020 Citrate cycle (TCA cycle);map00620 Pyruvate metabolism;map00630 Glyoxylate and dicarboxylate metabolism;map01100 Metabolic pathways;map01200 Carbon metabolism
Com_384_pos	5-Methylcytosine	cpd:C02376	5-Methylcytosine	C5H7N3O	map00240 Pyrimidine metabolism
Com_511_pos	1-Methyluric acid	cpd:C16359	1-Methyluric acid	C6H6N4O3	map00232 Caffeine metabolism
Com_510_pos	1-Methylnicotinamide	cpd:C02918	1-Methylnicotinamide; N(1)-Methylnicotinamide	C7H9N2O	map00760 Nicotinate and nicotinamide metabolism;map01100 Metabolic pathways
Com_47_neg	6-Phospho-D-glucono-1,5-lactone	cpd:C01236	D-Glucono-1,5-lactone 6-phosphate; 6-Phospho-D-glucono-1,5-lactone	C6H11O9P	map00030 Pentose phosphate pathway;map01100 Metabolic pathways;map01200 Carbon metabolism
Com_629_pos	Punicic Acid	cpd:C08364	Punicic acid; cis-9,trans-11,cis-13-Octadecatrienoic acid; Trichosanic acid	C18H30O2
Com_554_pos	N-Acetyl-L-histidine	cpd:C02997	N-Acetyl-L-histidine	C8H11N3O3
Com_666_pos	Cholesterol	cpd:C00187	Cholesterol; Cholest-5-en-3beta-ol	C27H46O	map00100 Steroid biosynthesis;map00120 Primary bile acid biosynthesis;map00140 Steroid hormone biosynthesis;map01100 Metabolic pathways
Com_161_neg	dGDP	cpd:C00361	dGDP; 2'-Deoxyguanosine 5'-diphosphate	C10H15N5O10P2	map00230 Purine metabolism;map01100 Metabolic pathways
Com_103_neg	Trehalose 6-phosphate	cpd:C00689	alpha,alpha'-Trehalose 6-phosphate; Trehalose 6-phosphate	C12H23O14P	map00500 Starch and sucrose metabolism;map01100 Metabolic pathways
Com_400_pos	11beta-Hydroxytestosterone	cpd:C18075	11beta,17beta-Dihydroxy-4-androsten-3-one; 11beta-Hydroxytestosterone	C19H28O3	map00140 Steroid hormone biosynthesis
Com_577_pos	L-Tyrosine	cpd:C00082	L-Tyrosine; (S)-3-(p-Hydroxyphenyl)alanine; (S)-2-Amino-3-(p-hydroxyphenyl)propionic acid; Tyrosine	C9H11NO3	map00130 Ubiquinone and other terpenoid-quinone biosynthesis;map00350 Tyrosine metabolism;map00360 Phenylalanine metabolism;map00400 Phenylalanine, tyrosine and tryptophan biosynthesis;map00730 Thiamine metabolism;map00970 Aminoacyl-tRNA biosynthesis;map01100 Metabolic pathways
Com_616_pos	Maleic Acid	cpd:C01384	Maleic acid; Maleate; cis-Butenedioic acid	C4H4O4	map00350 Tyrosine metabolism;map00650 Butanoate metabolism;map00760 Nicotinate and nicotinamide metabolism
Com_144_neg	D-Mannose	cpd:C00159	D-Mannose; Mannose; Seminose; Carubinose	C6H12O6	map00051 Fructose and mannose metabolism;map00052 Galactose metabolism;map00520 Amino sugar and nucleotide sugar metabolism;map01100 Metabolic pathways;map02010 ABC transporters;map04142 Lysosome
Com_160_neg	Sedoheptulose 1,7-bisphosphate	cpd:C00447	Sedoheptulose 1,7-bisphosphate; D-Sedoheptulose 1,7-bisphosphate; D-altro-Heptulose 1,7-biphosphate	C7H16O13P2	map01100 Metabolic pathways;map01200 Carbon metabolism
Com_251_neg	Citramalate	cpd:C00815	Citramalate; Citramalic acid; alpha-Hydroxypyrotartaric acid; 2-Methylmalic acid	C5H8O5
Com_596_pos	Sepiapterin	cpd:C00835	Sepiapterin	C9H11N5O3	map00790 Folate biosynthesis
Com_650_pos	4-Acetamidobutanoate	cpd:C02946	4-Acetamidobutanoate; N4-Acetylaminobutanoate	C6H11NO3	map00330 Arginine and proline metabolism;map01100 Metabolic pathways
Com_112_neg	cis-Aconitic acid	cpd:C00417	cis-Aconitate; cis-Aconitic acid	C6H6O6	map00020 Citrate cycle (TCA cycle);map00630 Glyoxylate and dicarboxylate metabolism;map01100 Metabolic pathways;map01210 2-Oxocarboxylic acid metabolism
Com_547_pos	D-Glutamine	cpd:C00819	D-Glutamine; D-2-Aminoglutaramic acid	C5H10N2O3	map00471 D-Glutamine and D-glutamate metabolism;map01100 Metabolic pathways
Com_109_neg	Thymidine	cpd:C00214	Thymidine; Deoxythymidine	C10H14N2O5	map00240 Pyrimidine metabolism;map01100 Metabolic pathways
Com_86_neg	dUMP	cpd:C00365	dUMP; Deoxyuridylic acid; Deoxyuridine monophosphate; Deoxyuridine 5'-phosphate; 2'-Deoxyuridine 5'-phosphate	C9H13N2O8P	map00240 Pyrimidine metabolism;map01100 Metabolic pathways
Com_4_neg	Decanoic acid	cpd:C01571	Decanoic acid; Decanoate; Decylic acid; n-Capric acid	C10H20O2	map00061 Fatty acid biosynthesis;map01100 Metabolic pathways
Com_267_neg	NADH	cpd:C00004	NADH; DPNH; Reduced nicotinamide adenine dinucleotide	C21H29N7O14P2	map00190 Oxidative phosphorylation;map01100 Metabolic pathways;map04020 Calcium signaling pathway
Com_601_pos	L-Lysine	cpd:C00047	L-Lysine; Lysine acid; 2,6-Diaminohexanoic acid	C6H14N2O2	map00310 Lysine degradation;map00780 Biotin metabolism;map00970 Aminoacyl-tRNA biosynthesis;map01100 Metabolic pathways;map01210 2-Oxocarboxylic acid metabolism;map01230 Biosynthesis of amino acids;map02010 ABC transporters
Com_426_pos	1,4-Diaminobutane	cpd:C00134	Putrescine; 1,4-Butanediamine; 1,4-Diaminobutane; Tetramethylenediamine; Butane-1,4-diamine	C4H12N2	map00330 Arginine and proline metabolism;map00480 Glutathione metabolism;map01100 Metabolic pathways;map02010 ABC transporters
Com_269_neg	Deoxycholic acid	cpd:C04483	Deoxycholic acid; Deoxycholate; 3alpha,12alpha-Dihydroxy-5beta-cholanate; 3alpha,12alpha-Dihydroxy-5beta-cholanic acid	C24H40O4
Com_522_pos	L-Lysinamide	cpd:C01930	L-Lysinamide	C6H15N3O
Com_406_pos	cAMP	cpd:C00575	3',5'-Cyclic AMP; Cyclic adenylic acid; Cyclic AMP; Adenosine 3',5'-phosphate; Adenosine 3',5'-cyclic phosphate; cAMP	C10H12N5O6P	map00230 Purine metabolism;map04010 MAPK signaling pathway;map04020 Calcium signaling pathway;map04114 Oocyte meiosis;map04261 Adrenergic signaling in cardiomyocytes;map04270 Vascular smooth muscle contraction;map04340 Hedgehog signaling pathway
Com_339_pos	Fexofenadine	cpd:C06999	Fexofenadine; 4-(1-Hydroxy-4-(4-(hydroxydiphenylmethyl)-1-piperidinyl)butyl)-alpha,alpha-dimethylbenzeneacetic acid	C32H39NO4
Com_344_pos	Galactinol	cpd:C01235	alpha-D-Galactosyl-(1->3)-1D-myo-inositol; O-alpha-D-Galactosyl-(1->3)-1D-myo-inositol; 3-O-alpha-D-Galactosyl-1D-myo-inositol; 1-alpha-D-Galactosyl-myo-inositol; Galactinol	C12H22O11	map00052 Galactose metabolism
Com_457_pos	Styrene	cpd:C07083	Styrene; Phenylethylene	C8H8	map01100 Metabolic pathways
Com_274_neg	gamma-Glutamylcysteine	cpd:C00669	gamma-L-Glutamyl-L-cysteine; L-gamma-Glutamylcysteine; 5-L-Glutamyl-L-cysteine; gamma-Glutamylcysteine	C8H14N2O5S	map00480 Glutathione metabolism;map01100 Metabolic pathways;map04216 Ferroptosis
Com_322_pos	Palmitoylethanolamide	cpd:C16512	Palmitoylethanolamide; Palmidrol	C18H37NO2
Com_259_neg	Xanthine	cpd:C00385	Xanthine	C5H4N4O2	map00230 Purine metabolism;map00232 Caffeine metabolism;map01100 Metabolic pathways
Com_318_pos	Glu-Glu	cpd:C01425	Glutamyl-glutamic acid; L-alpha-Glutamyl-L-glutamic acid; Glu-Glu	C10H16N2O7
Com_399_pos	16alpha-Hydroxytestosterone	cpd:C14600	16alpha-Hydroxytestosterone; 16alpha,17beta-Dihydroxy-4-androsten-3-one	C19H28O3
Com_10_neg	5'-Adenylic acid	cpd:C00020	AMP; Adenosine 5'-monophosphate; Adenylic acid; Adenylate; 5'-AMP; 5'-Adenylic acid; 5'-Adenosine monophosphate; Adenosine 5'-phosphate	C10H14N5O7P	map00230 Purine metabolism;map01100 Metabolic pathways;map04068 FoxO signaling pathway;map04150 mTOR signaling pathway
Com_673_pos	3-Methoxytyramine	cpd:C05587	3-Methoxytyramine	C9H13NO2	map00350 Tyrosine metabolism;map01100 Metabolic pathways
Com_82_neg	Sucrose	cpd:C00089	Sucrose; Cane sugar; Saccharose; 1-alpha-D-Glucopyranosyl-2-beta-D-fructofuranoside	C12H22O11	map00052 Galactose metabolism;map00500 Starch and sucrose metabolism;map01100 Metabolic pathways;map02010 ABC transporters
Com_275_neg	Sorbitol	cpd:C00794	D-Sorbitol; D-Glucitol; L-Gulitol; Sorbitol	C6H14O6	map00051 Fructose and mannose metabolism;map00052 Galactose metabolism;map01100 Metabolic pathways;map02010 ABC transporters
Com_382_pos	L-Homocitrulline	cpd:C02427	L-Homocitrulline	C7H15N3O3
Com_25_neg	dCMP	cpd:C00239	dCMP; Deoxycytidylic acid; Deoxycytidine monophosphate; Deoxycytidylate; 2'-Deoxycytidine 5'-monophosphate	C9H14N3O7P	map00240 Pyrimidine metabolism;map01100 Metabolic pathways
Com_607_pos	dGMP	cpd:C00362	dGMP; 2'-Deoxyguanosine 5'-monophosphate; 2'-Deoxyguanosine 5'-phosphate; Deoxyguanylic acid; Deoxyguanosine monophosphate	C10H14N5O7P	map00230 Purine metabolism;map01100 Metabolic pathways
Com_154_neg	Sulfoacetic acid	cpd:C14179	Sulfoacetate; Sulfoacetic acid	C2H4O5S	map00430 Taurine and hypotaurine metabolism
Com_205_neg	4-Hydroxyphenyllactate	cpd:C03672	3-(4-Hydroxyphenyl)lactate; 4-Hydroxyphenyllactate; p-Hydroxyphenyllactate; 2-Hydroxy-3-(4-hydroxyphenyl)propanoate	C9H10O4	map00130 Ubiquinone and other terpenoid-quinone biosynthesis;map00350 Tyrosine metabolism
Com_371_pos	1D-chiro-Inositol	cpd:C19891	1D-chiro-Inositol; 1,2,4/3,5,6-Cyclohexane-1,2,3,4,5,6-hexol; (+)-Inositol	C6H12O6	map00562 Inositol phosphate metabolism
Com_621_pos	trans-Cinnamic acid	cpd:C00423	trans-Cinnamate; trans-Cinnamic acid; (E)-Cinnamate; (2E)-3-Phenylprop-2-enoate	C9H8O2	map00130 Ubiquinone and other terpenoid-quinone biosynthesis;map00360 Phenylalanine metabolism;map01100 Metabolic pathways
Com_163_neg	D-Gluconic acid	cpd:C00257	D-Gluconic acid; D-Gluconate; D-gluco-Hexonic acid	C6H12O7	map00030 Pentose phosphate pathway;map01100 Metabolic pathways;map01200 Carbon metabolism
Com_456_pos	Testosterone	cpd:C00535	Testosterone; 17beta-Hydroxy-4-androsten-3-one	C19H28O2	map00140 Steroid hormone biosynthesis;map01100 Metabolic pathways
Com_111_neg	Xanthurenic Acid	cpd:C02470	Xanthurenic acid; Xanthurenate	C10H7NO4	map00380 Tryptophan metabolism
Com_193_neg	L-Arabinitol	cpd:C00532	L-Arabitol; L-Arabinol; L-Arabinitol; L-Lyxitol	C5H12O5	map00040 Pentose and glucuronate interconversions;map01100 Metabolic pathways
Com_659_pos	Glycine	cpd:C00037	Glycine; Aminoacetic acid; Gly	C2H5NO2	map00120 Primary bile acid biosynthesis;map00230 Purine metabolism;map00260 Glycine, serine and threonine metabolism;map00310 Lysine degradation;map00440 Phosphonate and phosphinate metabolism;map00480 Glutathione metabolism;map00630 Glyoxylate and dicarboxylate metabolism;map00730 Thiamine metabolism;map00860 Porphyrin and chlorophyll metabolism;map00970 Aminoacyl-tRNA biosynthesis;map01100 Meta…
Com_390_pos	Guanosine monophosphate	cpd:C00144	GMP; Guanosine 5'-phosphate; Guanosine monophosphate; Guanosine 5'-monophosphate; Guanylic acid	C10H14N5O8P	map00230 Purine metabolism;map01100 Metabolic pathways;map04744 Phototransduction
Com_139_neg	Palmitaldehyde	cpd:C00517	Hexadecanal; Palmitaldehyde	C16H32O	map00071 Fatty acid degradation
Com_578_pos	L-Canavanine	cpd:C00308	Canavanine; L-Canavanine; 2-Amino-4-(guanidinooxy)butyric acid	C5H12N4O3
Com_237_neg	Tropolone	cpd:C15474	Tropolone	C7H6O2
Com_448_pos	3-Hydroxy-DL-kynurenine	cpd:C02794	3-Hydroxykynurenine; 3-Hydroxy-DL-kynurenine	C10H12N2O4
Com_196_neg	Lactic acid	cpd:C01432	Lactate; Lactic acid; 2-Hydroxypropanoic acid; 2-Hydroxypropionic acid	C3H6O3
Com_660_pos	L-Arginine	cpd:C00062	L-Arginine; (S)-2-Amino-5-guanidinovaleric acid; L-Arg	C6H14N4O2	map00220 Arginine biosynthesis;map00330 Arginine and proline metabolism;map00472 D-Arginine and D-ornithine metabolism;map00970 Aminoacyl-tRNA biosynthesis;map01100 Metabolic pathways;map01230 Biosynthesis of amino acids;map02010 ABC transporters;map05132 Salmonella infection
Com_216_neg	Quinic acid	cpd:C00296	Quinate; Quinic acid; Kinic acid; Chinic acid; L-Quinic acid; L-Quinate; (-)-Quinic acid	C7H12O6	map00400 Phenylalanine, tyrosine and tryptophan biosynthesis
Com_537_pos	Trigonelline	cpd:C01004	N-Methylnicotinate; Trigonelline; Trigenelline; 1-Methylpyridinio-3-carboxylate; Betaine nicotinate; Caffearin; Gynesine	C7H7NO2	map00760 Nicotinate and nicotinamide metabolism
Com_61_neg	gamma-Muricholate	cpd:C17649	Hyocholate; Hyocholic acid; Iocholic acid; gamma-Muricholate; alpha-Hyocholic acid; 3alpha,6alpha,7alpha-Trihydroxy-5beta-cholan-24-oic acid; 6alpha-Hydroxychenodeoxycholic acid	C24H40O5
Com_431_pos	D-Glucosamine	cpd:C00329	D-Glucosamine; Chitosamine; 2-Amino-2-deoxy-D-glucose	C6H13NO5	map00520 Amino sugar and nucleotide sugar metabolism;map01100 Metabolic pathways
Com_43_neg	Anthranilic acid	cpd:C00108	Anthranilate; Anthranilic acid; o-Aminobenzoic acid; Vitamin L1; 2-Aminobenzoate	C7H7NO2	map00380 Tryptophan metabolism;map00400 Phenylalanine, tyrosine and tryptophan biosynthesis;map01100 Metabolic pathways;map01230 Biosynthesis of amino acids
Com_465_pos	Phthalate	cpd:C01606	Phthalate; o-Phthalic acid; 1,2-Benzenedicarboxylic acid	C8H6O4	map01100 Metabolic pathways;map02010 ABC transporters
Com_72_neg	Prostaglandin D2	cpd:C00696	Prostaglandin D2; (5Z,13E)-(15S)-9alpha,15-Dihydroxy-11-oxoprosta-5,13-dienoate; (5Z,13E,15S)-9alpha,15-Dihydroxy-11-oxoprosta-5,13-dienoate; PGD2	C20H32O5	map00590 Arachidonic acid metabolism;map01100 Metabolic pathways;map04080 Neuroactive ligand-receptor interaction
Com_104_neg	Citicoline	cpd:C00307	CDP-choline; Cytidine 5'-diphosphocholine; Citicoline	C14H26N4O11P2	map00564 Glycerophospholipid metabolism;map01100 Metabolic pathways
Com_212_neg	3-Methylsalicylate	cpd:C14088	3-Methylsalicylate	C8H8O3
Com_90_neg	Methylmalonate	cpd:C02170	Methylmalonate; Methylmalonic acid	C4H6O4	map00240 Pyrimidine metabolism;map00280 Valine, leucine and isoleucine degradation;map00640 Propanoate metabolism
Com_157_neg	Uric Acid	cpd:C00366	Urate; Uric acid	C5H4N4O3	map00230 Purine metabolism;map01100 Metabolic pathways
Com_447_pos	6-Aminohexanoate	cpd:C02378	6-Aminohexanoate; 6-Aminohexanoic acid; Epsilcapramine; 6-Aminocaproic acid	C6H13NO2	map01100 Metabolic pathways
Com_428_pos	3-Ureidopropionate	cpd:C02642	3-Ureidopropionate; 3-Ureidopropanoate; beta-Ureidopropionic acid; N-Carbamoyl-beta-alanine	C4H8N2O3	map00240 Pyrimidine metabolism;map00410 beta-Alanine metabolism;map00770 Pantothenate and CoA biosynthesis;map01100 Metabolic pathways
Com_94_neg	Tiglic acid	cpd:C08279	Tiglic acid; (E)-2,3-Dimethylacrylic acid	C5H8O2
Com_539_pos	Phloretate	cpd:C01744	Phloretate; Phloretic acid; 3-(4-Hydroxyphenyl)propionic acid	C9H10O3
Com_490_pos	Levodopa	cpd:C00355	3,4-Dihydroxy-L-phenylalanine; L-Dopa; 3-Hydroxy-L-tyrosine; L-beta-(3,4-Dihydroxyphenyl)alanine; Levodopa; Dihydroxy-L-phenylalanine	C9H11NO4	map00350 Tyrosine metabolism;map01100 Metabolic pathways
Com_91_neg	Dulcitol	cpd:C01697	Galactitol; Dulcitol; Dulcose	C6H14O6	map00052 Galactose metabolism;map01100 Metabolic pathways
Com_605_pos	Acetylcholine	cpd:C01996	Acetylcholine; O-Acetylcholine	C7H16NO2	map00564 Glycerophospholipid metabolism;map04080 Neuroactive ligand-receptor interaction;map04810 Regulation of actin cytoskeleton
Com_495_pos	Pipecolic acid	cpd:C00408	L-Pipecolate; Pipecolinic acid; Pipecolic acid; 2-Piperidinecarboxylic acid; (S)-Piperidine-2-carboxylic acid	C6H11NO2	map00310 Lysine degradation;map01100 Metabolic pathways
Com_458_pos	1-Methylhistidine	cpd:C01152	N(pi)-Methyl-L-histidine; N-pros-Methyl-L-histidine; 3-Methylhistidine; 1-Methylhistidine	C7H11N3O2	map00340 Histidine metabolism
Com_363_pos	5-Aminolevulinate	cpd:C00430	5-Aminolevulinate; 5-Amino-4-oxopentanoate; 5-Amino-4-oxovaleric acid	C5H9NO3	map00260 Glycine, serine and threonine metabolism;map00860 Porphyrin and chlorophyll metabolism;map01100 Metabolic pathways;map02010 ABC transporters
Com_211_neg	dGTP	cpd:C00286	dGTP; 2'-Deoxyguanosine 5'-triphosphate; Deoxyguanosine 5'-triphosphate; Deoxyguanosine triphosphate	C10H16N5O13P3	map00230 Purine metabolism;map01100 Metabolic pathways
Com_326_pos	L-Tryptophan	cpd:C00078	L-Tryptophan; Tryptophan; (S)-alpha-Amino-beta-(3-indolyl)-propionic acid	C11H12N2O2	map00260 Glycine, serine and threonine metabolism;map00380 Tryptophan metabolism;map00400 Phenylalanine, tyrosine and tryptophan biosynthesis;map00970 Aminoacyl-tRNA biosynthesis;map01100 Metabolic pathways;map01210 2-Oxocarboxylic acid metabolism;map01230 Biosynthesis of amino acids
Com_608_pos	S-Adenosyl-L-homocysteine	cpd:C00021	S-Adenosyl-L-homocysteine; S-Adenosylhomocysteine	C14H20N6O5S	map00270 Cysteine and methionine metabolism;map01100 Metabolic pathways;map01230 Biosynthesis of amino acids
Com_498_pos	beta-Nicotinamide adenine dinucleotide phosphate	cpd:C00006	NADP+; NADP; Nicotinamide adenine dinucleotide phosphate; beta-Nicotinamide adenine dinucleotide phosphate; TPN; Triphosphopyridine nucleotide; beta-NADP+	C21H29N7O17P3	map00480 Glutathione metabolism;map00760 Nicotinate and nicotinamide metabolism;map01100 Metabolic pathways
Com_133_neg	APS	cpd:C00224	Adenylyl sulfate; Adenosine 5'-phosphosulfate; APS; 5'-Adenylyl sulfate	C10H14N5O10PS	map00230 Purine metabolism;map00920 Sulfur metabolism;map01100 Metabolic pathways
Com_467_pos	L-allo-Isoleucine	cpd:C21096	L-allo-Isoleucine	C6H13NO2
Com_592_pos	Protocatechualdehyde	cpd:C16700	3,4-Dihydroxybenzaldehyde; Protocatechualdehyde	C7H6O3
Com_484_pos	Methionine	cpd:C01733	Methionine; 2-Amino-4-(methylthio)butyric acid	C5H11NO2S
Com_117_neg	Pyrophosphate	cpd:C00013	Diphosphate; Diphosphoric acid; Pyrophosphate; Pyrophosphoric acid; PPi	H4P2O7	map00190 Oxidative phosphorylation
