# Supplementary material for: Association analysis of transcriptome and quasi-targeted metabolomics reveals the regulation mechanism underlying broiler muscle tissue development at different levels of dietary guanidinoacetic acid
Source: Frontiers journal article supplement (doi:10.3389/fvets.2024.1384028), 2024-04-25
Supplement: Data_Sheet_1.ZIP [file meta_all_kegg_anno_category.xls]

KO_Pathway_Level1	KO_Pathway_Level2	Meta_Num	Metabolites
Cellular Processes	Cell growth and death	7	Com_274_neg Com_406_pos Com_42_neg Com_661_pos Com_347_pos Com_645_pos Com_398_pos
Cellular Processes	Cell motility	1	Com_605_pos
Cellular Processes	Cellular community - eukaryotes	2	Com_474_pos Com_504_pos
Cellular Processes	Transport and catabolism	4	Com_56_neg Com_144_neg Com_226_neg Com_42_neg
Environmental Information Processing	Membrane transport	30	Com_479_pos Com_82_neg Com_398_pos Com_275_neg Com_5_neg Com_12_neg Com_32_neg Com_362_pos Com_183_neg Com_545_pos Com_144_neg Com_363_pos Com_283_neg Com_288_neg Com_548_pos Com_603_pos Com_426_pos Com_491_pos Com_114_neg Com_74_neg Com_668_pos Com_601_pos Com_660_pos Com_465_pos Com_217_neg Com_152_neg Com_171_neg Com_330_pos Com_14_neg Com_652_pos
Environmental Information Processing	Signal transduction	9	Com_10_neg Com_406_pos Com_115_neg Com_217_neg Com_42_neg Com_114_neg Com_545_pos Com_226_neg Com_267_neg
Environmental Information Processing	Signaling molecules and interaction	15	Com_436_pos Com_165_neg Com_115_neg Com_474_pos Com_256_neg Com_658_pos Com_72_neg Com_42_neg Com_255_neg Com_504_pos Com_152_neg Com_226_neg Com_395_pos Com_594_pos Com_605_pos
Genetic Information Processing	Folding, sorting and degradation	4	Com_494_pos Com_661_pos Com_652_pos Com_603_pos
Genetic Information Processing	Translation	16	Com_601_pos Com_12_neg Com_326_pos Com_15_neg Com_479_pos Com_653_pos Com_545_pos Com_484_pos Com_577_pos Com_74_neg Com_661_pos Com_659_pos Com_660_pos Com_668_pos Com_481_pos Com_652_pos
Metabolism	Amino acid metabolism	113	Com_326_pos Com_78_neg Com_464_pos Com_205_neg Com_458_pos Com_319_pos Com_484_pos Com_519_pos Com_181_neg Com_481_pos Com_655_pos Com_426_pos Com_416_pos Com_487_pos Com_250_neg Com_556_pos Com_667_pos Com_284_neg Com_546_pos Com_206_neg Com_658_pos Com_565_pos Com_15_neg Com_166_neg Com_255_neg Com_386_pos Com_230_neg Com_490_pos Com_671_pos Com_513_pos Com_659_pos Com_385_pos Com_495_pos Com_4…
Metabolism	Biosynthesis of other secondary metabolites	8	Com_463_pos Com_511_pos Com_114_neg Com_259_neg Com_234_neg Com_9_neg Com_501_pos Com_481_pos
Metabolism	Carbohydrate metabolism	68	Com_206_neg Com_244_neg Com_344_pos Com_658_pos Com_183_neg Com_116_neg Com_166_neg Com_84_neg Com_107_neg Com_82_neg Com_67_neg Com_193_neg Com_231_neg Com_321_pos Com_294_neg Com_103_neg Com_275_neg Com_479_pos Com_91_neg Com_144_neg Com_159_neg Com_96_neg Com_32_neg Com_431_pos Com_56_neg Com_47_neg Com_189_neg Com_414_pos Com_108_neg Com_659_pos Com_164_neg Com_283_neg Com_92_neg Com_257_neg …
Metabolism	Energy metabolism	14	Com_267_neg Com_78_neg Com_117_neg Com_479_pos Com_113_neg Com_42_neg Com_152_neg Com_108_neg Com_226_neg Com_192_neg Com_40_neg Com_661_pos Com_481_pos Com_133_neg
Metabolism	Global and overview maps	219	Com_378_pos Com_326_pos Com_413_pos Com_78_neg Com_256_neg Com_453_pos Com_254_neg Com_77_neg Com_464_pos Com_321_pos Com_609_pos Com_275_neg Com_91_neg Com_319_pos Com_396_pos Com_20_neg Com_451_pos Com_259_neg Com_70_neg Com_144_neg Com_345_pos Com_181_neg Com_348_pos Com_481_pos Com_242_neg Com_562_pos Com_127_neg Com_165_neg Com_125_neg Com_426_pos Com_112_neg Com_114_neg Com_416_pos Com_487_…
Metabolism	Glycan biosynthesis and metabolism	1	Com_70_neg
Metabolism	Lipid metabolism	31	Com_4_neg Com_256_neg Com_479_pos Com_444_pos Com_220_neg Com_213_neg Com_115_neg Com_6_neg Com_355_pos Com_523_pos Com_141_neg Com_659_pos Com_273_neg Com_263_neg Com_118_neg Com_71_neg Com_268_neg Com_219_neg Com_456_pos Com_400_pos Com_666_pos Com_605_pos Com_81_neg Com_104_neg Com_271_neg Com_72_neg Com_64_neg Com_76_neg Com_152_neg Com_234_neg Com_139_neg
Metabolism	Metabolism of cofactors and vitamins	47	Com_658_pos Com_453_pos Com_166_neg Com_353_pos Com_661_pos Com_442_pos Com_609_pos Com_138_neg Com_577_pos Com_131_neg Com_12_neg Com_654_pos Com_476_pos Com_596_pos Com_26_neg Com_653_pos Com_77_neg Com_205_neg Com_108_neg Com_345_pos Com_659_pos Com_363_pos Com_348_pos Com_481_pos Com_633_pos Com_603_pos Com_498_pos Com_621_pos Com_113_neg Com_260_neg Com_95_neg Com_359_pos Com_668_pos Com_452…
Metabolism	Metabolism of other amino acids	38	Com_593_pos Com_568_pos Com_658_pos Com_87_neg Com_116_neg Com_486_pos Com_661_pos Com_442_pos Com_347_pos Com_645_pos Com_398_pos Com_20_neg Com_362_pos Com_188_neg Com_653_pos Com_141_neg Com_659_pos Com_481_pos Com_548_pos Com_257_neg Com_498_pos Com_426_pos Com_154_neg Com_660_pos Com_547_pos Com_74_neg Com_416_pos Com_274_neg Com_369_pos Com_324_pos Com_320_pos Com_49_neg Com_197_neg Com_152…
Metabolism	Metabolism of terpenoids and polyketides	1	Com_53_neg
Metabolism	Nucleotide metabolism	52	Com_378_pos Com_10_neg Com_50_neg Com_109_neg Com_394_pos Com_435_pos Com_678_pos Com_161_neg Com_242_neg Com_428_pos Com_145_neg Com_110_neg Com_25_neg Com_133_neg Com_390_pos Com_396_pos Com_20_neg Com_211_neg Com_451_pos Com_607_pos Com_70_neg Com_259_neg Com_659_pos Com_11_neg Com_562_pos Com_165_neg Com_86_neg Com_13_neg Com_90_neg Com_261_neg Com_168_neg Com_158_neg Com_226_neg Com_395_pos …
Metabolism	Xenobiotics biodegradation and metabolism	5	Com_461_pos Com_449_pos Com_569_pos Com_331_pos Com_423_pos
Organismal Systems	Circulatory system	6	Com_406_pos Com_115_neg Com_474_pos Com_255_neg Com_395_pos Com_372_pos
Organismal Systems	Endocrine system	1	Com_114_neg
Organismal Systems	Immune system	1	Com_42_neg
Organismal Systems	Sensory system	1	Com_390_pos
