# Supplementary material for: Association analysis of transcriptome and quasi-targeted metabolomics reveals the regulation mechanism underlying broiler muscle tissue development at different levels of dietary guanidinoacetic acid
Source: Frontiers journal article supplement (doi:10.3389/fvets.2024.1384028), 2024-04-25
Supplement: Data_Sheet_1.ZIP [file meta_all_lipidmaps_anno.xls]

Compound_ID	Name	Formula	Lipidmaps_ID	COMMON_NAME	SYSTEMATIC_NAME	SYNONYMS	CATEGORY	MAIN_CLASS	SUB_CLASS
Com_2_neg	2,3-Dinor-TXB2	C18H30O6	LMFA03030003	2,3-Dinor-TXB2	9S,11,15S-trihydroxy-2,3-dinor-thromboxa-5Z,13E-dien-1-oic acid	2,3-Dinor-Thromboxane B2	Fatty Acyls [FA]	Eicosanoids [FA03]	Thromboxanes [FA0303]
Com_4_neg	Decanoic acid	C10H20O2	LMFA01010010	Capric acid	Decanoic acid	C10:0; Caprinic acid; Decoic acid; Decylic acid	Fatty Acyls [FA]	Fatty Acids and Conjugates [FA01]	Straight chain fatty acids [FA0101]
Com_6_neg	12(S)-HETE	C20H32O3	LMFA03060064	12S-hydroxy-5E,8Z,10Z,14Z-eicosatetraenoic acid	12S-hydroxy-5E,8Z,10Z,14Z-eicosatetraenoic acid	5,8,10,14-Eicosatetraenoic acid, 12-hydroxy-, [S-(E,Z,Z,Z)]-; 12(S)-5,8,10,14-Hydroxyeicosatetraenoic acid; 12(S)-HETE; 12-HETE; 12-Hydroxy-5,8,10,14-eicosatetraenoic acid; 12-Hydroxyeicosatetraenoic acid; 12-L-Hydroxy-5,8,10,14-eicosatetraenoic acid; 12S-	Fatty Acyls [FA]	Eicosanoids [FA03]	Hydroxy/hydroperoxyeicosatetraenoic acids [FA0306]
Com_16_neg	15-Hete	C20H32O3	LMFA03060087	15-HETE	15-hydroxy-5Z,8Z,11Z,13E-eicosatetraenoic acid	_	Fatty Acyls [FA]	Eicosanoids [FA03]	Hydroxy/hydroperoxyeicosatetraenoic acids [FA0306]
Com_24_neg	13,14-dihydro-15-keto-PGD2	C20H32O5	LMFA03010022	13,14-dihydro-15-keto-PGD2	11,15-dioxo-9S-hydroxy-5Z-prostenoic acid	13,14-dihydro-15-keto-Prostaglandin D2; dhk-PGD2	Fatty Acyls [FA]	Eicosanoids [FA03]	Prostaglandins [FA0301]
Com_29_neg	Undecanedioic acid	C11H20O4	LMFA01170007	Undecanedioic acid	Undecanedioic acid	Undecandioic acid; 1,11-Undecanedioic acid	Fatty Acyls [FA]	Fatty Acids and Conjugates [FA01]	Dicarboxylic acids [FA0117]
Com_30_neg	Nonadecanoic acid	C19H38O2	LMFA01010019	Nonadecylic acid	nonadecanoic acid	C19:0	Fatty Acyls [FA]	Fatty Acids and Conjugates [FA01]	Straight chain fatty acids [FA0101]
Com_33_neg	2-Hydroxy-3-methylbutanoic acid	C5H10O3	LMFA01050478	2-Hydroxy-3-methylbutyric acid	2-hydroxy-3-methylbutanoic acid	_	Fatty Acyls [FA]	Fatty Acids and Conjugates [FA01]	Hydroxy fatty acids [FA0105]
Com_39_neg	N-Oleoyl Glycine	C20H37NO3	LMFA08020082	N-oleoyl glycine	N-(9Z-octadecenoyl)-glycine	EMA-1; Elmiric acid	Fatty Acyls [FA]	Fatty amides [FA08]	N-acyl amines [FA0802]
Com_46_neg	cholesteryl sulfate	C27H46O4S	LMST05020016	cholesterol sulfate	cholest-5-en-3beta-yl hydrogen sulfate	CHOLEST-5-EN-3-YL HYDROGEN SULFATE; cholesterol sulfate; cholesteryl sulfate	Sterols [ST]	Steroid conjugates [ST05]	Sulfates [ST0502]
Com_54_neg	Allolithocholic acid	C24H40O3	LMST04010005	Allolithocholic acid	3alpha-Hydroxy-5alpha-cholan-24-oic Acid	_	Sterols [ST]	Bile acids and derivatives [ST04]	C24 bile acids, alcohols, and derivatives [ST0401]
Com_55_neg	Isolithocholic acid	C24H40O3	LMST04010004	Isolithocholic acid	3beta-Hydroxy-5beta-cholan-24-oic Acid	_	Sterols [ST]	Bile acids and derivatives [ST04]	C24 bile acids, alcohols, and derivatives [ST0401]
Com_64_neg	Prostaglandin B2	C20H30O4	LMFA03010018	PGB2	15S-hydroxy-9-oxo-5Z,8(12),13E-prostatrienoic acid	Prostaglandin B2	Fatty Acyls [FA]	Eicosanoids [FA03]	Prostaglandins [FA0301]
Com_71_neg	Prostaglandin H2	C20H32O5	LMFA03010010	PGH2	9S,11R-epidioxy-15S-hydroxy-5Z,13E-prostadienoic acid	Prostaglandin H2	Fatty Acyls [FA]	Eicosanoids [FA03]	Prostaglandins [FA0301]
Com_72_neg	Prostaglandin D2	C20H32O5	LMFA03010004	PGD2	9S,15S-dihydroxy-11-oxo-5Z,13E-prostadienoic acid	Prostaglandin D2; 11-Dehydroprostaglandin F2-alpha; 11-Dehydroprostaglandin F2alpha; (5Z,13E,15S)-9alpha,15-Dihydroxy-11-oxoprosta-5,13-dienoate	Fatty Acyls [FA]	Eicosanoids [FA03]	Prostaglandins [FA0301]
Com_76_neg	Stearic acid	C18H36O2	LMFA01010018	Stearic acid	octadecanoic acid	Cetylacetic acid; Stearate; n-Octadecanoic acid; Octadecanoate; C18:0; Lactaric acid; Talgic acid; Bassinic acid; Stearophanic acid	Fatty Acyls [FA]	Fatty Acids and Conjugates [FA01]	Straight chain fatty acids [FA0101]
Com_93_neg	Sebacic acid	C10H18O4	LMFA01170006	Sebacic acid	Decanedioic acid	Iponic acid; Ipomic acid	Fatty Acyls [FA]	Fatty Acids and Conjugates [FA01]	Dicarboxylic acids [FA0117]
Com_94_neg	Tiglic acid	C5H8O2	LMFA01020030	Tiglic acid	2-methyl-2E-butenoic acid	alpha,beta-dimethyl acrylic acid; 2-Methyl-2-butenoic acid; (E)-2-methyl-Crotonic acid	Fatty Acyls [FA]	Fatty Acids and Conjugates [FA01]	Methyl branched fatty acids [FA0102]
Com_108_neg	Succinic acid	C4H6O4	LMFA01170043	Succinic acid	Butanedioic acid	Amber acid; Dihydrofumaric acid; Wormwood acid	Fatty Acyls [FA]	Fatty Acids and Conjugates [FA01]	Dicarboxylic acids [FA0117]
Com_115_neg	Prostaglandin I2	C20H32O5	LMFA03010087	PGI2	6,9S-epoxy-11R,15S-dihydroxy-5Z,13E-prostadienoic acid	Prostaglandin I2; Prostacyclin	Fatty Acyls [FA]	Eicosanoids [FA03]	Prostaglandins [FA0301]
Com_116_neg	Pyruvic Acid	C3H4O3	LMFA01060077	Pyruvic acid	2-oxo-propinoic acid	alpha-keto propionic acid	Fatty Acyls [FA]	Fatty Acids and Conjugates [FA01]	Oxo fatty acids [FA0106]
Com_118_neg	Prostaglandin G2	C20H32O6	LMFA03010009	PGG2	9S,11R-epidioxy-15S-hydroperoxy-5Z,13E-prostadienoic acid	Prostaglandin G2	Fatty Acyls [FA]	Eicosanoids [FA03]	Prostaglandins [FA0301]
Com_136_neg	Galactaric acid	C6H10O8	LMFA01170107	Galactaric acid	2R,3S,4R,5S-tetrahydroxy-hexanedioic acid	_	Fatty Acyls [FA]	Fatty Acids and Conjugates [FA01]	Dicarboxylic acids [FA0117]
Com_137_neg	6-keto PGE1	C20H32O6	LMFA03010012	6-keto PGE1	6,9-dioxo-11R,15S-dihydroxy-13E-prostenoic acid	6-keto Prostaglandin E1	Fatty Acyls [FA]	Eicosanoids [FA03]	Prostaglandins [FA0301]
Com_138_neg	Pimelic acid	C7H12O4	LMFA01170051	Pimelic acid	Heptanedioic acid	_	Fatty Acyls [FA]	Fatty Acids and Conjugates [FA01]	Dicarboxylic acids [FA0117]
Com_139_neg	Palmitaldehyde	C16H32O	LMFA06000088	Palmitaldehyde	hexadecanal	Palmitic aldehyde	Fatty Acyls [FA]	Fatty aldehydes [FA06]	_
Com_141_neg	Taurocholic acid	C26H45NO7S	LMST05040001	Taurocholic acid	N-(3alpha,7alpha,12alpha-trihydroxy-5beta-cholan-24-oyl)-taurine	Taurocholic Acid	Sterols [ST]	Steroid conjugates [ST05]	Taurine conjugates [ST0504]
Com_151_neg	Tetradecanedioic acid	C14H26O4	LMFA01170018	Tetradecanedioic acid	Tetradecanedioic acid	_	Fatty Acyls [FA]	Fatty Acids and Conjugates [FA01]	Dicarboxylic acids [FA0117]
Com_175_neg	2-Hydroxybutanoic acid	C4H8O3	LMFA01050342	2S-Hydroxybutanoic acid	2S-hydroxy-butanoic acid	2-Hydroxybutanoic acid	Fatty Acyls [FA]	Fatty Acids and Conjugates [FA01]	Hydroxy fatty acids [FA0105]
Com_177_neg	Itaconic acid	C5H6O4	LMFA01170063	Itaconic acid	2-methylenebutanedioic acid	2-methylidenebutanedioic acid;2-methylenesuccinic acid; 2-propene-1,2-dicarboxylic acid; Methylenesuccinic acid; propylenedicarboxylic acid	Fatty Acyls [FA]	Fatty Acids and Conjugates [FA01]	Dicarboxylic acids [FA0117]
Com_204_neg	PE(18:1(9Z)/0:0)	C23H46NO7P	LMGP02050004	PE(18:1(9Z)/0:0)	1-(9Z-octadecenoyl)-sn-glycero-3-phosphoethanolamine	9-Octadecenoic acid (Z)-, 3-[[(2-aminoethoxy)hydroxyphosphinyl]oxy]-2-hydroxypropyl ester, (R)-; PE(18:1/0:0); LPE(18:1); LPE(18:1)	Glycerophospholipids [GP]	Glycerophosphoethanolamines [GP02]	Monoacylglycerophosphoethanolamines [GP0205]
Com_213_neg	Traumatic acid	C12H20O4	LMFA01170002	Traumatic acid	2E-dodecenedioic acid	trans-2-dodecenedioic acid; trans-Traumatic acid	Fatty Acyls [FA]	Fatty Acids and Conjugates [FA01]	Dicarboxylic acids [FA0117]
Com_219_neg	Linoleic acid	C18H32O2	LMFA01030120	Linoleic acid	9Z,12Z-octadecadienoic acid	cis-9, cis-12-octadecadienoic acid; cis,cis-Linoleic acid; cis,cis-9,12-octadecadienoic acid; Linoleate; 9Z,12Z-Linoleic acid; Telfairic acid; C18:2n-6,9; Linolic acid; Leinolic acid	Fatty Acyls [FA]	Fatty Acids and Conjugates [FA01]	Unsaturated fatty acids [FA0103]
Com_220_neg	gamma-Linolenic acid	C18H30O2	LMFA01030141	gamma-Linolenic acid	6Z,9Z,12Z-octadecatrienoic acid	cis-6, cis-9, cis-12-octadecatrienoic acid; C18:3n-6,9,12; GLA; Gammolenic acid; Gamolenic acid	Fatty Acyls [FA]	Fatty Acids and Conjugates [FA01]	Unsaturated fatty acids [FA0103]
Com_227_neg	8,15-Dihete	C20H32O4	LMFA03060109	8,15-DiHETE	(5Z,9E,11Z,13E)-8,15-dihydroxyicosa-5,9,11,13-tetraenoic acid	_	Fatty Acyls [FA]	Eicosanoids [FA03]	Hydroxy/hydroperoxyeicosatetraenoic acids [FA0306]
Com_250_neg	Citraconic acid	C5H6O4	LMFA01170099	Citraconic acid	2-methyl-2Z-butenedioic acid	_	Fatty Acyls [FA]	Fatty Acids and Conjugates [FA01]	Dicarboxylic acids [FA0117]
Com_256_neg	Prostaglandin E2	C20H32O5	LMFA03010003	PGE2	9-oxo-11R,15S-dihydroxy-5Z,13E-prostadienoic acid	Prostaglandin E2; Dinoprostone; Prostin E2	Fatty Acyls [FA]	Eicosanoids [FA03]	Prostaglandins [FA0301]
Com_268_neg	Chenodeoxycholic acid	C24H40O4	LMST04010032	Chenodeoxycholic Acid	3alpha,7alpha-Dihydroxy-5beta-cholan-24-oic Acid	_	Sterols [ST]	Bile acids and derivatives [ST04]	C24 bile acids, alcohols, and derivatives [ST0401]
Com_269_neg	Deoxycholic acid	C24H40O4	LMST04010040	Deoxycholic acid	3alpha,12alpha-Dihydroxy-5beta-cholan-24-oic Acid	_	Sterols [ST]	Bile acids and derivatives [ST04]	C24 bile acids, alcohols, and derivatives [ST0401]
Com_270_neg	lithocholic acid	C24H40O3	LMST04010003	Lithocholic acid	3alpha-Hydroxy-5beta-cholan-24-oic Acid	_	Sterols [ST]	Bile acids and derivatives [ST04]	C24 bile acids, alcohols, and derivatives [ST0401]
Com_271_neg	Cholic acid	C24H40O5	LMST04010001	Cholic acid	3Alpha,7Alpha,12Alpha-trihydroxy-5Beta-cholan-24-oic acid	Cholic Acid	Sterols [ST]	Bile acids and derivatives [ST04]	C24 bile acids, alcohols, and derivatives [ST0401]
Com_273_neg	Myristic acid	C14H28O2	LMFA01010014	Myristic acid	tetradecanoic acid	C14:0	Fatty Acyls [FA]	Fatty Acids and Conjugates [FA01]	Straight chain fatty acids [FA0101]
Com_286_neg	9-HpOTrE	C18H30O4	LMFA02000108	9-HpOTrE	9-hydroperoxy-10E,12,15Z-octadecatrienoic acid	_	Fatty Acyls [FA]	Octadecanoids [FA02]	Other Octadecanoids [FA0200]
Com_303_pos	Lysopc 18:2	C26H50NO7P	LMGP01050137	1-linoleoyl-sn-glycero-3-phosphocholine	(2R)-2-hydroxy-3-[(9Z,12Z)-nonadeca-9,12-dienoyloxy]propyl 2-(trimethylammonio)ethyl phosphate	1-(9Z,12Z-octadecadienoyl)-glycero-3-phosphocholine;1-(9Z,12Z-octadecadienoyl)-sn-glycero-3-phosphocholine;1-18:2-lysoPC;1-linoleoyl-glycero-3-phosphocholine;LPC(18:2);LPC(18:2/0:0);LPC(18:2n6/0:0);LPC(18:2omega6/0:0);LyPC(18:2);LyPC(18:2n6/0:0);LyPC(18:2omega6/0:0);LysoPC(18:2);LysoPC(18:2/0:0);LysoPC(18:2n6/0:0);LysoPC(18:2omega6/0:0);Lysophosphatidylcholine(18:2);Lysophosphatidylcholine(18:2/0…	Glycerophospholipids [GP]	Glycerophosphocholines [GP01]	Monoacylglycerophosphocholines [GP0105]
Com_309_pos	Isovalerylcarnitine	C12H23NO4	LMFA07070076	Isovalerylcarnitine	3-[(3-methylbutanoyl)oxy]-4-(trimethylazaniumyl)butanoate	_	Fatty Acyls [FA]	Fatty esters [FA07]	Fatty acyl carnitines [FA0707]
Com_315_pos	cis-gondoic acid	C20H38O2	LMFA01030085	cis-gondoic acid	11Z-eicosenoic acid	cis-11-eicosenoic acid; cis-11-icosenoic acid; C20:1n-9	Fatty Acyls [FA]	Fatty Acids and Conjugates [FA01]	Unsaturated fatty acids [FA0103]
Com_322_pos	Palmitoylethanolamide	C18H37NO2	LMFA08040057	Palmitoyl-EA-d4	N-(2-hydroxyethyl-1,1,2,2-d4)-hexadecanamide	Palmitoyl ethanolamide; palmitoylethanolamide; Anandamide (16:0); N-palmitoyl ethanolamine	Fatty Acyls [FA]	Fatty amides [FA08]	N-acyl ethanolamides (endocannabinoids) [FA0804]
Com_323_pos	Dehydrocholic acid	C24H34O5	LMST04010106	Dehydrocholic acid	3,7,12-Trioxo-5beta-cholan-24-oic Acid	_	Sterols [ST]	Bile acids and derivatives [ST04]	C24 bile acids, alcohols, and derivatives [ST0401]
Com_327_pos	Erucamide	C22H43NO	LMFA08010028	Erucamide	13Z-docosenamide	_	Fatty Acyls [FA]	Fatty amides [FA08]	Primary amides [FA0801]
Com_328_pos	Hexadecanamide	C16H33NO	LMFA08010009	Palmitamide	Hexadecanamide	_	Fatty Acyls [FA]	Fatty amides [FA08]	Primary amides [FA0801]
Com_380_pos	11-Ketoetiocholanolone	C19H28O3	LMST02020087	11-Ketoetiocholanolone	_	_	Sterols [ST]	Steroids [ST02]	C19 steroids (androgens) and derivatives [ST0202]
Com_401_pos	10E,12Z-Octadecadienoic acid	C18H32O2	LMFA01030125	10E,12Z-octadecadienoic acid	10E,12Z-octadecadienoic acid	trans-10, cis-12-octadecadienoic acid; C18:2n-6,8	Fatty Acyls [FA]	Fatty Acids and Conjugates [FA01]	Unsaturated fatty acids [FA0103]
Com_403_pos	Nandrolone	C18H26O2	LMST02010044	nandrolone	17beta-hydroxyestr-4-en-3-one	(17beta)-17-hydroxyestr-4-en-3-one; 17beta-hydroxy-19-nor-4-androsten-3-one; 17beta-hydroxy-4-estren-3-one; 19-Norandrostenolone; 19-Nortestosterone; 4-estren-17beta-ol-3-one; Nandrolone	Sterols [ST]	Steroids [ST02]	C18 steroids (estrogens) and derivatives [ST0201]
Com_411_pos	L-Octanoylcarnitine	C15H29NO4	LMFA07070002	O-octanoyl-R-carnitine	O-octanoyl-R-carnitine	L-Octanoylcarnitine	Fatty Acyls [FA]	Fatty esters [FA07]	Fatty acyl carnitines [FA0707]
Com_412_pos	Hexanoylcarnitine	C13H25NO4	LMFA07070070	Hexanoylcarnitine	3-(hexanoyloxy)-4-(trimethylazaniumyl)butanoate	_	Fatty Acyls [FA]	Fatty esters [FA07]	Fatty acyl carnitines [FA0707]
Com_444_pos	Ergosterol	C28H44O	LMST01030093	Ergosterol	ergosta-5,7,22E-trien-3beta-ol	_	Sterols [ST]	Sterols [ST01]	Ergosterols and C24-methyl derivatives [ST0103]
Com_456_pos	Testosterone	C19H28O2	LMST02020002	Testosterone	17beta-hydroxyandrost-4-en-3-one	_	Sterols [ST]	Steroids [ST02]	C19 steroids (androgens) and derivatives [ST0202]
Com_496_pos	Azelaic acid	C9H16O4	LMFA01170054	Azelaic acid	Nonanedioic acid	_	Fatty Acyls [FA]	Fatty Acids and Conjugates [FA01]	Dicarboxylic acids [FA0117]
Com_540_pos	Alpha-Linolenic acid	C18H30O2	LMFA01030152	alpha-Linolenic acid	9Z,12Z,15Z-octadecatrienoic acid	cis-9, cis-12, cis-15-octadecatrienoic acid; C18:3n-3,6,9	Fatty Acyls [FA]	Fatty Acids and Conjugates [FA01]	Unsaturated fatty acids [FA0103]
Com_563_pos	2-Methylbutyroylcarnitine	C12H23NO4	LMFA07070034	2-Methylbutyroylcarnitine	3-[(2-methylbutanoyl)oxy]-4-(trimethylazaniumyl)butanoate	_	Fatty Acyls [FA]	Fatty esters [FA07]	Fatty acyl carnitines [FA0707]
Com_580_pos	Oleamide	C18H35NO	LMFA08010004	Oleamide	9Z-octadecenamide	Oleic acid amide	Fatty Acyls [FA]	Fatty amides [FA08]	Primary amides [FA0801]
Com_585_pos	Acetylcarnitine	C9H17NO4	LMFA07070060	DL-Acetylcarnitine	3-(acetyloxy)-4-(trimethylazaniumyl)butanoate	Acetylcarnitine; Acetyl-DL-carnitine	Fatty Acyls [FA]	Fatty esters [FA07]	Fatty acyl carnitines [FA0707]
Com_587_pos	Adipamide	C6H12N2O2	LMFA08010017	Adipamide	adipamide	_	Fatty Acyls [FA]	Fatty amides [FA08]	Primary amides [FA0801]
Com_597_pos	11-cis-Retinol	C20H30O	LMPR01090005	11-cis-Retinol	11Z-retinol	_	Prenol Lipids [PR]	Isoprenoids [PR01]	Retinoids [PR0109]
Com_615_pos	Adipic Acid	C6H10O4	LMFA01170048	Adipic acid	Hexanedioic acid	_	Fatty Acyls [FA]	Fatty Acids and Conjugates [FA01]	Dicarboxylic acids [FA0117]
Com_629_pos	Punicic Acid	C18H30O2	LMFA01030146	Punicic acid	9Z,11E,13Z-octadecatrienoic acid	Trichosanic acid; cis-9, trans-11, cis-13-octadecatrienoic acid; C18:3n-5,7,9; Trichosanoic acid; Punicinic acid	Fatty Acyls [FA]	Fatty Acids and Conjugates [FA01]	Unsaturated fatty acids [FA0103]
Com_666_pos	Cholesterol	C27H46O	LMST01010001	Cholesterol	cholest-5-en-3beta-ol	Cholesterol; Cholest-5-en-3-ol; (3beta)-Cholest-5-en-3-ol; Cholesteryl alcohol	Sterols [ST]	Sterols [ST01]	Cholesterol and derivatives [ST0101]
