# Supplementary material for: Association analysis of transcriptome and quasi-targeted metabolomics reveals the regulation mechanism underlying broiler muscle tissue development at different levels of dietary guanidinoacetic acid
Source: Frontiers journal article supplement (doi:10.3389/fvets.2024.1384028), 2024-04-25
Supplement: Data_Sheet_1.ZIP [file meta_all_lipidmaps_anno_category.xls]

CATEGORY	MAIN_CLASS	Metabolites_nums	Metabolites	Metabolite_Descriptions
Fatty Acyls [FA]	Eicosanoids [FA03]	12	Com_2_neg;Com_6_neg;Com_16_neg;Com_24_neg;Com_64_neg;Com_71_neg;Com_72_neg;Com_115_neg;Com_118_neg;Com_137_neg;Com_227_neg;Com_256_neg	2,3-Dinor-TXB2;12(S)-HETE;15-Hete;13,14-dihydro-15-keto-PGD2;Prostaglandin B2;Prostaglandin H2;Prostaglandin D2;Prostaglandin I2;Prostaglandin G2;6-keto PGE1;8,15-Dihete;Prostaglandin E2
Fatty Acyls [FA]	Fatty Acids and Conjugates [FA01]	25	Com_4_neg;Com_29_neg;Com_30_neg;Com_33_neg;Com_76_neg;Com_93_neg;Com_94_neg;Com_108_neg;Com_116_neg;Com_136_neg;Com_138_neg;Com_151_neg;Com_175_neg;Com_177_neg;Com_213_neg;Com_219_neg;Com_220_neg;Com_250_neg;Com_273_neg;Com_315_pos;Com_401_pos;Com_496_pos;Com_540_pos;Com_615_pos;Com_629_pos	Decanoic acid;Undecanedioic acid;Nonadecanoic acid;2-Hydroxy-3-methylbutanoic acid;Stearic acid;Sebacic acid;Tiglic acid;Succinic acid;Pyruvic Acid;Galactaric acid;Pimelic acid;Tetradecanedioic acid;2-Hydroxybutanoic acid;Itaconic acid;Traumatic acid;Linoleic acid;gamma-Linolenic acid;Citraconic acid;Myristic acid;cis-gondoic acid;10E,12Z-Octadecadienoic acid;Azelaic acid;Alpha-Linolenic acid;Adi…
Fatty Acyls [FA]	Fatty aldehydes [FA06]	1	Com_139_neg	Palmitaldehyde
Fatty Acyls [FA]	Fatty amides [FA08]	6	Com_39_neg;Com_322_pos;Com_327_pos;Com_328_pos;Com_580_pos;Com_587_pos	N-Oleoyl Glycine;Palmitoylethanolamide;Erucamide;Hexadecanamide;Oleamide;Adipamide
Fatty Acyls [FA]	Fatty esters [FA07]	5	Com_309_pos;Com_411_pos;Com_412_pos;Com_563_pos;Com_585_pos	Isovalerylcarnitine;L-Octanoylcarnitine;Hexanoylcarnitine;2-Methylbutyroylcarnitine;Acetylcarnitine
Fatty Acyls [FA]	Octadecanoids [FA02]	1	Com_286_neg	9-HpOTrE
Glycerophospholipids [GP]	Glycerophosphocholines [GP01]	1	Com_303_pos	Lysopc 18:2
Glycerophospholipids [GP]	Glycerophosphoethanolamines [GP02]	1	Com_204_neg	PE(18:1(9Z)/0:0)
Prenol Lipids [PR]	Isoprenoids [PR01]	1	Com_597_pos	11-cis-Retinol
Sterols [ST]	Bile acids and derivatives [ST04]	7	Com_54_neg;Com_55_neg;Com_268_neg;Com_269_neg;Com_270_neg;Com_271_neg;Com_323_pos	Allolithocholic acid;Isolithocholic acid;Chenodeoxycholic acid;Deoxycholic acid;lithocholic acid;Cholic acid;Dehydrocholic acid
Sterols [ST]	Steroid conjugates [ST05]	2	Com_46_neg;Com_141_neg	cholesteryl sulfate;Taurocholic acid
Sterols [ST]	Steroids [ST02]	3	Com_380_pos;Com_403_pos;Com_456_pos	11-Ketoetiocholanolone;Nandrolone;Testosterone
Sterols [ST]	Sterols [ST01]	2	Com_444_pos;Com_666_pos	Ergosterol;Cholesterol
