# Supplementary material for: Association analysis of transcriptome and quasi-targeted metabolomics reveals the regulation mechanism underlying broiler muscle tissue development at different levels of dietary guanidinoacetic acid
Source: Frontiers journal article supplement (doi:10.3389/fvets.2024.1384028), 2024-04-25
Supplement: Data_Sheet_1.ZIP [file meta_intensity_all.xls]

Compound_ID	Name	Chinese name	Formula	Molecular Weight	RT [min]	Class(English)	Class(Chinese)	CAS	all_NC_1	all_NC_2	all_NC_3	all_No_GAA_1	all_No_GAA_2	all_No_GAA_3	all_High_GAA_1	all_High_GAA_2	all_High_GAA_3	all_QC1	all_QC2	all_QC3
Com_1_neg	Tauro-alpha-Muricholic acid sodium salt	Å£»Ç-°¢¶û·¨-Êóµ¨ËáÄÆÑÎ	C26H44NO7S.Na	537.69	9.01	Bile Acids	µ¨Ö­Ëá	"25696-60-0"	344100	365700	1972000	218200	1321000	194900	869300	126800	215200	539900	561700	565600
Com_2_neg	2,3-Dinor-TXB2	2,3-¶þÕýÄýÑª¶ñÍé	C18H30O6	342.427	0.97	Eicosanoid	Ñõ»¯Ö¬ÖÊ	"63250-09-9"	39390	33130	22850	59710	28670	26500	61570	34490	27830	44750	49910	31480
Com_3_neg	Indolelactate	3-ßÅßáÈéËá	C11H11NO3	205.21	6.93	Indole And Its Derivatives	ßÅßá¼°ÆäÑÜÉúÎï	"1821-52-9"	19630	21570	12980	20490	23910	15090	32820	16650	16820	20480	16630	20720
Com_4_neg	Decanoic acid	Õý¹ïËá	C10H20O2	172.265	2.16	Fatty Acyls	Ö¬·¾õ£Àà	"334-48-5"	2251000	2843000	2092000	3371000	3554000	674100	3117000	953100	1785000	1915000	2328000	2437000
Com_5_neg	Maltotriose	ÂóÑ¿ÈýÌÇ	C18H32O16	504.437	0.7	Carbohydrates And Its Derivatives	ÌÇÀà¼°ÆäÑÜÉúÎï	"1109-28-0"	1056000	1235000	1073000	906400	1385000	1094000	1223000	1012000	961600	998600	1098000	1116000
Com_6_neg	12(S)-HETE	12-ôÇ¶þÊ®ÍéËÄÏ©Ëá	C20H32O3	320.466	13.03	Eicosanoid	Ñõ»¯Ö¬ÖÊ	"54397-83-0"	4054	3945	6832	3499	7992	2488	11510	6605	10560	4211	5017	4488
Com_8_neg	1-Caffeoylquinic Acid	1-¿§·Èõ£¿üÄþËá	C16H18O9	354.309	18.71	Organic Acid And Its Derivatives	ÓÐ»úËá¼°ÆäÑÜÉúÎï	"1241-87-8"	3132000	3042000	2978000	2504000	2677000	2997000	2650000	2232000	2039000	3317000	2154000	2007000
Com_9_neg	D-Glucose 6-phosphate	D-ÆÏÌÑÌÇ-6-Á×Ëá	C6H13O9P	260.136	0.92	Carbohydrates And Its Derivatives	ÌÇÀà¼°ÆäÑÜÉúÎï	"56-73-5"	330800000	343600000	121800000	433900000	533400000	276000000	455500000	139600000	141000000	286700000	318900000	366800000
Com_10_neg	5'-Adenylic acid	5'-ÏÙàÑßÊºËÜÕËá	C10H14N5O7P	347.221	1.036	Nucleotide And Its Derivates	ºËÜÕËá¼°ÆäÑÜÉúÎï	"61-19-8"	1780000	6859000	6626000	564100	6475000	6450000	857200	700600	446700	2819000	2968000	3849000
Com_11_neg	UMP	ÄòÜÕ-5-µ¥Á×Ëá	C9H13N2O9P	324.181	1.037	Nucleotide And Its Derivates	ºËÜÕËá¼°ÆäÑÜÉúÎï	"58-97-9"	1843000	9908000	13000000	467000	18830000	9057000	16240000	17290000	20140000	10150000	11340000	13400000
Com_12_neg	L-Threonine	L-ËÕ°±Ëá	C4H9NO3	119.12	0.888	Amino Acid And Its Derivatives	°±»ùËá¼°ÆäÑÜÉúÎï	"72-19-5"	88850	34130	59510	94510	129100	116100	73580	31210	84930	86030	66870	80400
Com_13_neg	Deoxyguanosine	ÍÑÑõÄñÜÕ	C10H13N5O4	267.241	3.181	Nucleotide And Its Derivates	ºËÜÕËá¼°ÆäÑÜÉúÎï	"961-07-9"	64930	58830	64290	62540	79800	37990	64240	57580	121800	57520	60830	69670
Com_14_neg	Trehalose	º£ÔåÌÇ	C12H22O11	342.296	0.962	Carbohydrates And Its Derivatives	ÌÇÀà¼°ÆäÑÜÉúÎï	"99-20-7"	118400	101000	69440	159200	69480	86760	144200	109600	59370	127800	111000	87130
Com_15_neg	L-Asparagine	L-Ìì¶¬ÃÅõ£°·	C4H8N2O3	132.12	0.843	Amino Acid And Its Derivatives	°±»ùËá¼°ÆäÑÜÉúÎï	"70-47-3"	159300	109100	120700	360400	154400	320600	236400	402800	566700	219700	254000	411600
Com_16_neg	15-Hete	15-ôÇ¶þÊ®ÍéËÄÏ©Ëá	C20H32O3	320.5	13.08	Eicosanoid	Ñõ»¯Ö¬ÖÊ	"54845-95-3"	4240	3570	8499	3389	7704	5750	10140	6778	8441	4233	4572	4747
Com_17_neg	Shikimic Acid	Ã§²ÝËá	C7H10O5	174.15	5.24	Alcohols and polyols	´¼ºÍ¶àÔª´¼	"138-59-0"	60320	138300	38410	31130	16460	212500	37160	190300	48140	72990	74480	76890
Com_18_neg	Beta-Alanine	¦Â-°±»ù±ûËá	C3H7NO2	89.09	4.54	Amino Acid And Its Derivatives	°±»ùËá¼°ÆäÑÜÉúÎï	"107-95-9"	5189	5158	2921	4906	2427	4543	5819	5290	5296	3774	3670	4767
Com_19_neg	Erythronolactone	(3R,4R)-D-³àÍªËáÄÚõ¥	C4H6O4	118.09	4.03	Organoheterocyclic compounds	ÓÐ»úÔÓ»·»¯ºÏÎï	"15667-21-7"	85660	74090	79100	89780	104700	84240	89560	95760	92220	121500	134300	175300
Com_20_neg	3-Hydroxypropanoic acid	3-ôÇ»ù±ûËá	C3H6O3	90.08	1.15	Organic Acid And Its Derivatives	ÓÐ»úËá¼°ÆäÑÜÉúÎï	"503-66-2"	17370	22640	19880	24030	24814	36940	26730	25740	23700	20530	20150	27620
Com_21_neg	Hydroxyphenyllactic acid	ôÇ±½»ùÈéËá	C9H10O4	182.17	5.07	Organic Acid And Its Derivatives	ÓÐ»úËá¼°ÆäÑÜÉúÎï	"306-23-0"	274700	204200	106200	224500	229400	142700	385700	310100	156300	183600	199600	212100
Com_22_neg	4-Hydroxyphenylethanol	¶ÔôÇ»ù±½ÒÒ´¼	C8H10O2	138.16	7.61	Phenols And Its Derivatives	·ÓÀà¼°ÆäÑÜÉúÎï	"501-94-0"	525000	493200	502500	482600	479900	445200	542700	525100	533300	514200	485200	506300
Com_23_neg	Isocytosine	Òì°ûà×à¤	C4H5N3O	111.1	0.91	Nucleotide And Its Derivates	ºËÜÕËá¼°ÆäÑÜÉúÎï	"108-53-2"	3928	6443	4453	6315	5555	5429	3733	5735	4280	3785	5112	7042
Com_24_neg	13,14-dihydro-15-keto-PGD2	13,14-¶þÇâ-15-ÍªPGD2	C20H32O5	352.465	1.04	Eicosanoid	Ñõ»¯Ö¬ÖÊ	"59894-07-4"	13060	25080	55400	29660	25310	12560	26070	26890	22090	20840	23630	12770
Com_25_neg	dCMP	2'-ÍÑÑõ°ûÜÕ-5'-µ¥Á×Ëá	C9H14N3O7P	307.197	1.04	Nucleotide And Its Derivates	ºËÜÕËá¼°ÆäÑÜÉúÎï	"1032-65-1"	40310	72820	91690	42810	38380	33520	66770	35220	46110	41470	47380	61440
Com_26_neg	Pantetheine	·ºõ£ÛÏ»ùÒÒ°·	C11H22N2O4S	278.13	5.84	Amino Acid And Its Derivatives	°±»ùËá¼°ÆäÑÜÉúÎï	"496-65-1"	36250	128800	60700	34450	45180	75150	133000	152800	68350	56530	60310	61580
Com_27_neg	4-Hydroxy-2-oxoglutaric acid	4-ôÇ»ù-2-ÍªÎì¶þËá	C5H6O6	162.098	0.74	Organic Acid And Its Derivatives	ÓÐ»úËá¼°ÆäÑÜÉúÎï	"1187-99-1"	4597000	4859000	4603000	4153000	4928000	4545000	4860000	4465000	4208000	4425000	4508000	4621000
Com_28_neg	beta-Hydroxyisobutyrate	¦Â-ôÇ»ùÒì¶¡Ëá	C4H8O3	104.104	2.4	Organic Acid And Its Derivatives	ÓÐ»úËá¼°ÆäÑÜÉúÎï	"2068-83-9"	379000	346100	515000	753300	828800	311000	746800	484700	397000	423300	463800	515300
Com_29_neg	Undecanedioic acid	Ê®Ò»Íé¶þËá	C11H20O4	216.27	8.77	Fatty Acyls	Ö¬·¾õ£Àà	"1852-04-6"	425800	393500	391300	401300	397300	414400	396800	421300	372700	403400	419800	406800
Com_30_neg	Nonadecanoic acid	ÕýÌ¼Ê®¾ÅËá	C19H38O2	298.5	18.28	Fatty Acyls	Ö¬·¾õ£Àà	"646-30-0"	858600	1022000	828800	904300	829800	739100	650700	657000	513500	1074000	892800	519300
Com_31_neg	Monobutyl phthalate	ÁÚ±½¶þ¼×Ëáµ¥¶¡õ¥	C12H14O4	222.24	9.719	Organic Acid And Its Derivatives	ÓÐ»úËá¼°ÆäÑÜÉúÎï	"131-70-4"	152000	161200	155400	140100	162400	154200	147100	157900	152500	141800	145400	157300
Com_32_neg	D-Ribose	D-ºËÌÇ	C5H10O5	150.13	0.92	Carbohydrates And Its Derivatives	ÌÇÀà¼°ÆäÑÜÉúÎï	"50-69-1"	55930	49860	61830	45920	76290	62960	68100	65870	48390	54200	74090	66000
Com_33_neg	2-Hydroxy-3-methylbutanoic acid	2-ôÇ»ù-3-¼×»ù¶¡Ëá	C5H10O3	118.13	4.932	Fatty Acyls	Ö¬·¾õ£Àà	"4026-18-0"	214300	236000	170000	266300	353300	237900	183400	224700	285700	189800	229400	251300
Com_34_neg	orotidine-5-phosphate	ÈéÇåËáºËÜÕ-5-Á×Ëá	C10H13N2O11P	368.19	2.75	Nucleotide And Its Derivates	ºËÜÕËá¼°ÆäÑÜÉúÎï		599900	792200	383300	165100	818300	631900	804500	1023000	419600	632000	600600	421000
Com_35_neg	2-Oxoadipic acid	2-Ñõ´ú¼º¶þËá	C6H8O5	160.125	8.05	Organic Acid And Its Derivatives	ÓÐ»úËá¼°ÆäÑÜÉúÎï	"3184-35-8"	1374000	1763000	996500	1839000	1037000	1926000	1896000	1847000	1927000	1700000	2174000	1760000
Com_36_neg	Phosphonotyrosine	O-Á×ËáÀÒ°±Ëá	C9H12NO6P	261.168	0.94	Amino Acid And Its Derivatives	°±»ùËá¼°ÆäÑÜÉúÎï	"21820-51-9"	109900	128000	144200	88470	98940	96940	89630	79870	95790	157500	103200	78350
Com_37_neg	O-Desmethylnaproxen	(S)-2-(6-ôÇ»ù-2-ÝÁ)±ûËá	C13H12O3	216.233	11.86	Benzene and substituted derivatives	±½¼°ÆäÑÜÉúÎï	"52079-10-4"	16230	17720	26250	22190	26220	20980	18070	24050	23410	22930	22380	16560
Com_38_neg	Nelarabine	ÄÎÀ­±õ	C11H15N5O5	297.267	4.11	Others	ÆäËü	"121032-29-9"	210700	174800	176800	160300	206800	221400	170600	190600	205800	162500	169000	183200
Com_39_neg	N-Oleoyl Glycine	N-ÓÍõ£¸Ê°±Ëá	C20H37NO3	339.513	14.62	Organic Acid And Its Derivatives	ÓÐ»úËá¼°ÆäÑÜÉúÎï	"2601-90-3"	2693	4901	4656	3649	4920	4908	4844	4227	3459	3057	3250	2975
Com_40_neg	Carbamoylphosphate	°±¼×»ùõ£Á×Ëá	CH2NO5P--	139.004	0.86	Organic Acid And Its Derivatives	ÓÐ»úËá¼°ÆäÑÜÉúÎï	"590-55-6"	480700	428900	1122000	994800	505200	650300	639200	1097000	1506000	673700	788000	1052000
Com_41_neg	Butylmalonic acid	¶¡»ù±û¶þËá	C7H12O4	160.168	0.7	Organic Acid And Its Derivatives	ÓÐ»úËá¼°ÆäÑÜÉúÎï	"534-59-8"	34540000	34440000	33360000	29000000	34350000	31940000	33550000	32720000	30000000	31990000	30730000	28890000
Com_42_neg	ATP	ÈýÁ×ËáÏÙÜÕ	C10H16N5O13P3	507.181	1.04	Nucleotide And Its Derivates	ºËÜÕËá¼°ÆäÑÜÉúÎï	"56-65-5"	21840000	293300	299700	42710000	105700	126500	61210	51860	12660	779900	845500	787300
Com_43_neg	Anthranilic acid	ÁÚ°±»ù±½¼×Ëá	C7H7NO2	137.14	1.44	Benzoic Acid And Its Derivatives	±½¼×Ëá¼°ÆäÑÜÉúÎï	"118-92-3"	140200	51130	59680	39620	98020	50500	32950	142500	124700	68890	71750	89610
Com_44_neg	Alloxan	ËÄÑõà×à¤	C4H4N2O5	160.085	0.7	Organoheterocyclic compounds	ÓÐ»úÔÓ»·»¯ºÏÎï	"2244-11-3"	80150000	82670000	79390000	69860000	84740000	80860000	86760000	75150000	71960000	79230000	76250000	74610000
Com_45_neg	cis-4-Hydroxy-D-proline	Ë³Ê½-4-ôÇ»ù-D-¸¬°±Ëá	C5H9NO3	131.13	2.26	Organic Acid And Its Derivatives	ÓÐ»úËá¼°ÆäÑÜÉúÎï	"2584-71-6"	181700	88570	99820	144100	221300	151400	154900	91580	231300	106200	140500	145000
Com_46_neg	cholesteryl sulfate	µ¨çÞ´¼ÁòËáÑÎ	C27H46O4S	466.717	0.94	Hormones	¼¤ËØ	"1256-86-6"	461900	438200	94240	587100	1111000	632400	1459000	140400	189100	501500	422200	489100
Com_47_neg	6-Phospho-D-glucono-1,5-lactone	6-Á×Ëá-ÆÏÌÑÌÇ-1,5-ÄÚõ¥	C6H11O9P	258.12	0.97	Sugar Acids And Its Derivatives	ÌÇËá¼°ÆäÑÜÉúÎï	"2641-81-8"	2055000	2673000	975100	3107000	3123000	1457000	2732000	850600	597800	1291000	1716000	1947000
Com_48_neg	6-Phospho-D-gluconate	6-Á×ËáÆÏÌÑÌÇËá	C6H13O10P	276.135	0.98	Sugar Acids And Its Derivatives	ÌÇËá¼°ÆäÑÜÉúÎï	"921-62-0"	871800	682000	1441000	1065000	1089000	780700	1006000	1207000	1353000	910200	856000	963500
Com_49_neg	Acetyl phosphate	ÒÒõ£Á×Ëá	C2H5O5P	140.032	0.9	Organic Acid And Its Derivatives	ÓÐ»úËá¼°ÆäÑÜÉúÎï	"590-54-5"	2568000	3466000	1289000	3904000	5223000	2640000	3932000	1836000	1774000	3115000	3106000	3099000
Com_50_neg	ADP-ribose	ADPºËÌÇ	C15H23N5O14P2	591.315	1.05	Nucleotide And Its Derivates	ºËÜÕËá¼°ÆäÑÜÉúÎï	"20762-30-5"	38600000	55980000	32470000	24290000	42480000	40310000	43800000	33850000	49260000	31260000	40600000	37580000
Com_51_neg	Ala-trp	L-±û°±õ£-L-É«°±Ëá	C14H17N3O3	275.303	5.46	Amino Acid And Its Derivatives	°±»ùËá¼°ÆäÑÜÉúÎï	"16305-75-2"	163300	211400	69610	321200	284500	367400	169100	217400	248200	201600	205600	225800
Com_52_neg	N-Acetylglucosamine 1-phosphate	N-ÒÒõ£ÆÏÌÑÌÇ°· 1-Á×Ëá	C8H16NO9P	301.1	0.91	Carbohydrates And Its Derivatives	ÌÇÀà¼°ÆäÑÜÉúÎï		212100	225200	373000	265300	245300	215300	306900	454100	477900	229200	311100	325900
Com_53_neg	2-C-Methyl-D-erythritol 2,4-cyclodiphosphate	2-C-¼×»ù-D-³àÞºÌÇ´¼-2,4-»·¶þÁ×Ëáõ¥	C5H12O9P2	278.09	0.89	Organic oxygen compounds	ÓÐ»úÑõ»¯ºÏÎï	"143488-44-2"	981800	636600	919200	767500	733700	1140000	1083000	761300	1087000	830900	799100	837800
Com_54_neg	Allolithocholic acid	±ðÊ¯µ¨Ëá	C24H40O3	376.579	11.18	Bile Acids	µ¨Ö­Ëá	"2276-93-9"	2303000	1557000	3481000	2178000	1548000	2776000	1957000	2946000	2992000	1839000	1964000	2011000
Com_55_neg	Isolithocholic acid	ÒìÊ¯µ¨Ëá	C24H40O3	376.579	13.06	Bile Acids	µ¨Ö­Ëá	"1534-35-6"	13530	11580	9143	9082	29040	8205	11430	8816	7464	11960	11860	5283
Com_56_neg	D-Mannose 6-phosphate	D-¸ÊÂ¶ÌÇ6-Á×Ëá	C6H13O9P	260.14	0.87	Carbohydrates And Its Derivatives	ÌÇÀà¼°ÆäÑÜÉúÎï	"3672-15-9"	315900000	330700000	126000000	373600000	489300000	269200000	418200000	150800000	137700000	297200000	304100000	316100000
Com_57_neg	4-Hydroxy-6-methyl-2-pyrone	4-ôÇ»ù-6-¼×»ù-2-ßÁà«Íª	C6H6O3	126.11	0.84	Organoheterocyclic compounds	ÓÐ»úÔÓ»·»¯ºÏÎï	"675-10-5"	247800	143000	393900	206600	146200	221700	149700	353700	369700	179800	204300	228500
Com_58_neg	m-Coumaric acid	¼äÏã¶¹Ëá	C9H8O3	164.16	1.83	Cinnamic acids and derivatives	Èâ¹ðËá¼°ÆäÑÜÉúÎï	"588-30-7"	372400	322300	245300	363700	447800	342300	407500	457100	478700	288700	283600	532600
Com_59_neg	Isocitrate	ÒìÄûÃÊËá	C6H8O7	192.12	1.46	Organic Acid And Its Derivatives	ÓÐ»úËá¼°ÆäÑÜÉúÎï	"320-77-4"	1463000	1492000	2496000	2222000	1771000	348300	1399000	2078000	2533000	1167000	1283000	1827000
Com_60_neg	3-Oxo-7alpha,12alpha-hydroxy-5beta-cholanoic acid	3-ÍÑÇâµ¨Ëá	C24H38O5	406.562	10.321	Bile Acids	µ¨Ö­Ëá	"2304-89-4"	15590	12050	11870	10590	11160	13220	7364	6231	8801	30270	26430	16230
Com_61_neg	gamma-Muricholate	3a,6a,7a-ÈýôÇ»ù-5¦Â-µ¨Ëá	C24H40O5	408.57	9.997	Bile Acids	µ¨Ö­Ëá	"547-75-1"	3798	16510	25791	9208	20180	18236	7628	20605	17981	33660	33720	28510
Com_62_neg	N alpha-Acetyl-L-Arginine	N¦Á-ÒÒõ£-L-¾«°±Ëá	C8H16N4O3	216.238	1.03	Amino Acid And Its Derivatives	°±»ùËá¼°ÆäÑÜÉúÎï	"155-84-0"	21100	11540	16940	26320	10630	19940	18600	28700	6774	33540	19570	9421
Com_63_neg	L-Fucose	L-ÑÒÔåÌÇ	C6H12O5	164.156	0.98	Carbohydrates And Its Derivatives	ÌÇÀà¼°ÆäÑÜÉúÎï	"2438-80-4"	10450	6727	9688	4056	9769	11110	11100	11780	6801	9621	7580	6082
Com_64_neg	Prostaglandin B2	Ç°ÁÐÏÙËØB2	C20H30O4	334.45	0.7	Hormones	¼¤ËØ	"13367-85-6"	68870	80860	120200	113000	123600	91120	134300	113000	78170	99800	95990	96040
Com_65_neg	Uridine 5'-Diphospho-N-Acetylgalactosamine	ÄòÜÕ-5'-¶þÁ×Ëá-N-ÒÒõ£»ù°±»ù°ëÈéÌÇ	C17H27N3O17P2	607.354	1.0	Nucleotide And Its Derivates	ºËÜÕËá¼°ÆäÑÜÉúÎï	"7277-98-7"	2631000	1497000	3856000	2401000	3467000	2094000	2237000	2188000	2107000	1494000	1967000	2317000
Com_66_neg	D-Glucuronic acid	ÆÏÌÑÌÇÈ©Ëá	C6H10O7	194.14	0.894	Sugar Acids And Its Derivatives	ÌÇËá¼°ÆäÑÜÉúÎï	"6556-12-3"	31370	44270	66200	48750	37170	52330	33610	76680	54830	39960	52640	43990
Com_67_neg	L-Lactic acid	L-ÈéËá	C3H6O3	90.08	1.487	Organic Acid And Its Derivatives	ÓÐ»úËá¼°ÆäÑÜÉúÎï	"79-33-4"	2751000	2392000	2439000	2162000	2865000	2505000	2225000	2605000	2498000	2235000	2390000	2669000
Com_68_neg	L-Malate	Æ»¹ûËá	C4H6O5	134.09	1.089	Tca Cycle	ÈýôÈËáÑ­»·	"97-67-6"	11230000	9545000	9992000	11490000	11750000	16210000	9887000	14740000	8781000	11260000	11550000	10960000
Com_69_neg	3-Methyladipic acid	3-¼×»ù¼º¶þËá	C7H12O4	160.17	5.747	Fatty Acyls	Ö¬·¾õ£Àà	"3058-01-3"	207300	199000	256000	214200	228600	195700	221400	247700	213000	205600	195700	240700
Com_70_neg	CTP	5'-ÈýÁ×Ëá°ûÜÕ	C9H16N3O14P3	483.156	0.87	Nucleotide And Its Derivates	ºËÜÕËá¼°ÆäÑÜÉúÎï	"65-47-4"	146600	82400	118900	114400	128400	120700	112300	216200	208300	107200	125000	152400
Com_71_neg	Prostaglandin H2	Ç°ÁÐÏÙËØH2	C20H32O5	352.465	9.33	Hormones	¼¤ËØ	"42935-17-1"	3190	9141	38160	3965	16330	4938	15470	20830	4618	8605	8985	10510
Com_72_neg	Prostaglandin D2	Ç°ÁÐÏÙËØD2	C20H32O5	352.465	9.34	Hormones	¼¤ËØ	"41598-07-6"	3902	7361	39000	3879	16340	7639	13660	21160	4851	9799	12030	9682
Com_73_neg	Phosphocreatine	¼¡ËáÁ×Ëá	C4H10N3O5P	211.113	0.91	Organic Acid And Its Derivatives	ÓÐ»úËá¼°ÆäÑÜÉúÎï	"67-07-2"	231900	40040	59340	617500	54810	58850	1321000	483300	48090	93770	105100	106500
Com_74_neg	L-Histidine	L-×é°±Ëá	C6H9N3O2	155.15	0.76	Amino Acid And Its Derivatives	°±»ùËá¼°ÆäÑÜÉúÎï	"71-00-1"	5190000	3871000	3861000	4157000	5506000	4560000	3006000	5717000	4009000	3980000	4127000	4196000
Com_75_neg	D-threo-Isocitric acid	D-ËÕ°±Ëá-ÒìÄûÃÊËá	C6H8O7	192.124	1.41	Organic Acid And Its Derivatives	ÓÐ»úËá¼°ÆäÑÜÉúÎï	"6061-97-8"	160700	116500	287100	187800	137200	17980	77960	141700	162500	128400	117000	136400
Com_76_neg	Stearic acid	Ó²Ö¬Ëá	C18H36O2	284.477	2.27	Fatty Acyls	Ö¬·¾õ£Àà	"57-11-4"	830100	232100	376100	644100	1255000	736600	857500	328700	1824000	289800	602500	814800
Com_77_neg	3'-Dephospho-CoA	3'-Á×Ëá¸¨Ã¸A	C21H35N7O13P2S	687.554	4.47	Co-Enzyme Factor	¸¨Ã¸Òò×Ó	"3633-59-8"	7221	42110	31460	9181	70530	18180	68900	95320	86550	34860	34500	42980
Com_78_neg	L-Homoserine	L-¸ßË¿°±Ëá	C4H9NO3	119.119	1.9	Amino Acid And Its Derivatives	°±»ùËá¼°ÆäÑÜÉúÎï	"672-15-1"	18310	40450	31740	36940	48310	24310	12700	29860	3819	20730	21580	31170
Com_79_neg	DL-o-Tyrosine	DL-O-ÀÒ°±Ëá	C9H11NO3	181.189	1.81	Organic Acid And Its Derivatives	ÓÐ»úËá¼°ÆäÑÜÉúÎï	"2370-61-8"	6516000	2582000	3264000	4529000	6535000	3990000	5914000	6469000	6976000	4713000	4840000	5787000
Com_80_neg	D-Lactic acid	D-ôÇ»ù±ûËá	C3H6O3	90.08	1.44	Organic Acid And Its Derivatives	ÓÐ»úËá¼°ÆäÑÜÉúÎï	"10326-41-7"	1783000	2332000	2019000	2157000	2548000	2385000	2283000	2395000	2166000	1894000	2040000	2226000
Com_81_neg	Dihydroxyacetone phosphate	Á×Ëá¶þôÇ»ù±ûÍª	C3H7O6P	170.058	0.9	Carbohydrates And Its Derivatives	ÌÇÀà¼°ÆäÑÜÉúÎï	"57-04-5"	3630000	1671000	1260000	6886000	870400	502800	969200	435188	121600	1324000	1305000	1452000
Com_82_neg	Sucrose	D-ÕáÌÇ	C12H22O11	342.297	0.99	Carbohydrates And Its Derivatives	ÌÇÀà¼°ÆäÑÜÉúÎï	"57-50-1"	91640	69590	32050	122800	55800	76780	116900	69820	54550	106800	89940	67890
Com_83_neg	D-Ribose 5-phophate	D-ºËÌÇ-5-Á×Ëá	C5H11O8P	230.11	0.89	Organic Acid And Its Derivatives	ÓÐ»úËá¼°ÆäÑÜÉúÎï	"207671-46-3"	2130000	1805000	2391000	1851000	5397000	3683000	4132000	8787000	8340000	3111000	3218000	3711000
Com_84_neg	D-Xylulose 5-phosphate	D-Ä¾ÍªÌÇ-5-Á×Ëá	C5H11O8P	230.11	0.9	Carbohydrates And Its Derivatives	ÌÇÀà¼°ÆäÑÜÉúÎï	"4212-65-1"	3779000	3338000	4386000	2959000	10630000	7248000	7888000	17700000	19000000	6126000	7225000	7555000
Com_85_neg	D-Xylonate	Ä¾ÌÇËá	C5H10O6	166.129	0.91	Organic Acid And Its Derivatives	ÓÐ»úËá¼°ÆäÑÜÉúÎï	"526-91-0"	2317000	1393000	1521000	1359000	1870000	1798000	1372000	1617000	1311000	1468000	1578000	1398000
Com_86_neg	dUMP	ÍÑÑõÄòÜÕËá	C9H13N2O8P	308.182	0.92	Nucleotide And Its Derivates	ºËÜÕËá¼°ÆäÑÜÉúÎï	"964-26-1"	67230	121000	193800	252700	62470	195300	44650	77360	55260	161400	92420	139500
Com_87_neg	Fosfomycin	Á×Ã¹ËØ	C3H7O4P	138.059	11.02	Organic Acid And Its Derivatives	ÓÐ»úËá¼°ÆäÑÜÉúÎï	"23155-02-4"	40080	39560	40060	35700	39340	34910	35180	34690	32440	46670	38090	31020
Com_88_neg	Ethylmalonate	ÒÒ»ù±û¶þËá	C5H8O4	132.115	6.37	Organic Acid And Its Derivatives	ÓÐ»úËá¼°ÆäÑÜÉúÎï	"601-75-2"	14820	9039	12940	15880	18220	22460	11600	12750	15370	13890	15590	17030
Com_89_neg	Thymidine 3,5-cyclic monophosphate	ÐØÜÕ3,5-»·µ¥Á×Ëá	C10H13N2O7P	304.193	4.2	Nucleotide And Its Derivates	ºËÜÕËá¼°ÆäÑÜÉúÎï	"6453-60-7"	22160	27940	25790	24050	26630	29340	23090	28510	27160	21010	26970	29200
Com_90_neg	Methylmalonate	¼×»ù±û¶þËá	C4H6O4	118.09	1.938	Organic Acid And Its Derivatives	ÓÐ»úËá¼°ÆäÑÜÉúÎï	"516-05-2"	3169000	8069000	5669000	8053000	8741000	5341000	2776000	5502000	923400	4540000	4659000	4913000
Com_91_neg	Dulcitol	¼ºÁù´¼	C6H14O6	182.17	0.897	Carbohydrates And Its Derivatives	ÌÇÀà¼°ÆäÑÜÉúÎï	"608-66-2"	11760	16930	5882	23310	13940	11680	8088	9096	6608	14740	8042	7518
Com_92_neg	Gluconolactone	ÆÏÌÇËáÄÚõ¥	C6H10O6	178.14	1.02	Amino Acid And Its Derivatives	°±»ùËá¼°ÆäÑÜÉúÎï	"90-80-2"	23080	36420	42820	30990	37370	27010	45090	45130	51940	48090	34540	34250
Com_93_neg	Sebacic acid	¹ï¶þËá	C10H18O4	202.248	8.111	Organic Acid And Its Derivatives	ÓÐ»úËá¼°ÆäÑÜÉúÎï	"111-20-6"	432600	444700	424200	352300	417100	359800	353100	461200	374200	418300	364100	354000
Com_94_neg	Tiglic acid	Ìè¸÷Ëá	C5H8O2	100.116	1.07	Fatty Acyls	Ö¬·¾õ£Àà	"80-59-1"	920300	664500	1250000	668600	473400	501100	573800	584200	783700	814400	854900	607200
Com_95_neg	4-Hydroxyphenylpyruvate	4-ôÇ±½»ù±ûÍªËá	C9H8O4	180.16	1.38	Benzene and substituted derivatives	±½¼°ÆäÈ¡´úÑÜÉúÎï	"156-39-8"	457300	488000	355400	522300	354800	364400	272400	291800	280800	540400	374000	260400
Com_96_neg	Oxaloacetate	²Ýõ£ÒÒËá	C4H4O5	132.072	0.71	Organic Acid And Its Derivatives	ÓÐ»úËá¼°ÆäÑÜÉúÎï	"328-42-7"	2064000	4359000	3610000	2464000	3196000	2931000	2265000	2675000	3044000	3050000	2592000	3216000
Com_97_neg	Tetrahydroaldosterone	ËÄÇâÈ©çÞÍª	C21H32O5	364.476	0.97	Hormones	¼¤ËØ	"13489-75-3"	5950	5447	7853	4872	4691	3767	11240	7988	18220	11050	6323	5878
Com_98_neg	Tolfenamic acid	ÍÐÃðËá	C14H12ClNO2	261.7	2.15	Benzoic Acid And Its Derivatives	±½¼×Ëá¼°ÆäÑÜÉúÎï	"13710-19-5"	126900	102900	67660	164400	214900	109211	157700	106296	53750	97540	58630	85220
Com_99_neg	3-PRENYL-4-HYDROXYACETOPHENONE	3-ÒìÎìÏ©-4-ôÇ»ù±½ÒÒÍª	C13H16O2	204.26	3.76	Ketones	ÍªÀà	"26932-05-8"	144600	67070	64610	140300	86260	159400	100300	256100	106600	97580	110900	115800
Com_100_neg	alpha-Benzylsuccinic acid	¦Á-ÜÐ»ù¶¡¶þËá	C11H12O4	208.211	0.71	Organic Acid And Its Derivatives	ÓÐ»úËá¼°ÆäÑÜÉúÎï	"884-33-3"	231300	203400	229500	177100	195300	211100	234100	210300	225300	197200	221500	263600
Com_101_neg	6-Sialyllactose	6'-ÍÙÒºÈéÌÇ	C23H39NO19	633.551	0.73	Carbohydrates And Its Derivatives	ÌÇÀà¼°ÆäÑÜÉúÎï	"35890-39-2"	24180	43160	30110	33840	39870	28300	48080	22720	25550	45170	34690	45240
Com_102_neg	2-Hydroxyisocaproic Acid	2-ôÇ»ù-4-¼×»ùÎìËá	C6H12O3	132.158	6.39	Fatty Acyls	Ö¬·¾õ£Àà	"498-36-2"	13190	6589	10480	14400	17680	20280	9470	10280	12330	13320	14480	11960
Com_103_neg	Trehalose 6-phosphate	º£ÔåÌÇ-6-Á×Ëá	C12H23O14P	422.276	0.96	Carbohydrates And Its Derivatives	ÌÇÀà¼°ÆäÑÜÉúÎï	"4484-88-2"	253300	351700	34270	309000	156700	120200	268200	41590	102700	148900	192900	204100
Com_104_neg	Citicoline	°û¶þÁ×µ¨¼î	C14H26N4O11P2	488.324	0.89	Pyrimidines and pyrimidine derivatives	à×à¤¼°ÆäÑÜÉúÎï	"987-78-0"	56090	31420	51970	25230	81250	36290	33880	27360	54570	45370	48040	32540
Com_105_neg	Homotaurine	3-°±»ù±ûÍé»ÇËá	C3H9NO3S	139.17	0.84	Organic Acid And Its Derivatives	ÓÐ»úËá¼°ÆäÑÜÉúÎï	"3687-18-1"	27840	16140	31040	16820	12030	11040	8745	26130	22770	24040	24340	22100
Com_106_neg	Allitol	ËâÌÇ´¼	C6H14O6	182.172	0.91	Sugar Alcohols	ÌÇ´¼	"488-44-8"	9309	21530	13920	25170	28750	15640	10750	5669	14720	17870	15680	13910
Com_107_neg	scyllo-Inositol	ÇàÐ·¼¡´¼	C6H12O6	180.16	0.853	Carbohydrates And Its Derivatives	ÌÇÀà¼°ÆäÑÜÉúÎï	"488-59-5"	430400	317000	494900	468900	353500	444800	416600	700700	602900	376400	449500	560800
Com_108_neg	Succinic acid	çúçêËá	C4H6O4	118.09	1.936	Tca Cycle	ÈýôÈËáÑ­»·	"110-15-6"	7679000	18880000	12910000	18290000	19800000	12320000	6605000	12530000	2105000	10530000	11460000	11990000
Com_109_neg	Thymidine	ÐØÜÕ	C10H14N2O5	242.23	4.289	Nucleotide And Its Derivates	ºËÜÕËá¼°ÆäÑÜÉúÎï	"50-89-5"	9227	8875	12750	10570	12050	7837	10880	5713	12270	8580	9221	10800
Com_110_neg	Cytosine	°ûà×à¤	C4H5N3O	111.1	0.875	Nucleotide And Its Derivates	ºËÜÕËá¼°ÆäÑÜÉúÎï	"71-30-7"	62850	59610	39580	56440	74300	53300	40650	83290	42680	52820	54560	63240
Com_111_neg	Xanthurenic Acid	»ÆÄòËá	C10H7NO4	205.17	4.977	Organic Acid And Its Derivatives	ÓÐ»úËá¼°ÆäÑÜÉúÎï	"59-00-7"	266200	159000	190100	266800	307600	234000	329800	239100	293500	210500	237200	258800
Com_112_neg	cis-Aconitic acid	Ë³Ê½ÎÚÍ·Ëá	C6H6O6	174.11	1.766	Tca Cycle	ÈýôÈËáÑ­»·	"585-84-2"	26950	29640	54670	53570	28540	30160	35140	45060	22040	26470	21660	31580
Com_113_neg	Riboflavin-5-phosphate	2,6-Ýì¶þ·Ó	C17H21N4O9P	456.344	5.52	Nucleotide And Its Derivates	ºËÜÕËá¼°ÆäÑÜÉúÎï	"146-17-8"	9106	7695	11320	13100	8250	6439	10170	8541	6682	7535	5387	5673
Com_114_neg	D-Glucopyranose	¦Â-D-ÆÏÌÑÌÇ	C6H12O6	180.156	0.87	Carbohydrates And Its Derivatives	ÌÇÀà¼°ÆäÑÜÉúÎï	"28905-12-6"	153600	157100	180200	158400	166800	174200	166600	184000	149800	157200	167600	162200
Com_115_neg	Prostaglandin I2	Ç°ÁÐÏÙËØI2	C20H32O5	352.465	9.35	Hormones	¼¤ËØ	"35121-78-9"	5754	11370	52460	5153	23080	7577	14950	25490	5831	14300	15770	14320
Com_116_neg	Pyruvic Acid	±ûÍªËá	C3H4O3	88.062	1.78	Tca Cycle	ÈýôÈËáÑ­»·	"127-17-3"	23570	35310	19950	23460	30080	17590	21510	23260	21550	25750	18700	38860
Com_117_neg	Pyrophosphate	½¹Á×Ëá	H4O7P2	177.975	0.97	Others	ÆäËü	"2466-09-3"	58720000	32380000	68300000	43660000	51300000	69940000	61590000	84620000	82290000	51260000	50510000	54440000
Com_118_neg	Prostaglandin G2	Ç°ÁÐÏÙËØG2	C20H32O6	368.465	2.69	Hormones	¼¤ËØ	"51982-36-6"	297800	372400	196300	70480	382700	319700	322200	460600	190100	313900	331100	208100
Com_119_neg	Phosphopyruvic acid	Á×Ï©´¼±ûÍªËá	C3H5O6P	168.042	1.03	Organic Acid And Its Derivatives	ÓÐ»úËá¼°ÆäÑÜÉúÎï		363800	310924	310800	1198000	189300	188000	1155000	125700	66030	236700	238300	256800
Com_120_neg	1-Dodecanol	Ê®¶þ´¼	C12H26O	186.33	6.18	Fatty Acyls	Ö¬·¾õ£Àà	"112-53-8"	30030	29610	35520	36150	28510	31350	34160	75620	95580	32440	28460	35760
Com_121_neg	Succinic anhydride	¶¡¶þËáôû	C4H4O3	100.07	1.02	Organic Acid And Its Derivatives	ÓÐ»úËá¼°ÆäÑÜÉúÎï	"108-30-5"	815700	688500	1131000	549900	515800	538200	502100	560700	653400	668900	559400	530500
Com_122_neg	Hydantoin-5-propionic acid	ÒÒÄÚõ£ëå-5-±ûËá	C6H8N2O4	172.14	2.18	Organoheterocyclic compounds	ÓÐ»úÔÓ»·»¯ºÏÎï	"5624-26-0"	1710000	2059000	1533000	2416000	2734000	557400	2395000	750400	1350000	1478000	1776000	1859000
Com_123_neg	Indoleacetaldehyde	ßÅßáÒÒÈ©	C10H9NO	159.18	6.92	Organoheterocyclic compounds	ÓÐ»úÔÓ»·»¯ºÏÎï	"2591-98-2"	4626	3389	1753	3725	3746	3177	6423	2295	2611	4337	3630	5123
Com_124_neg	Dimethylmalonic acid	¶þ¼×»ù±û¶þËá	C5H8O4	132.11	0.68	Organic Acid And Its Derivatives	ÓÐ»úËá¼°ÆäÑÜÉúÎï	"595-46-0"	781900	1356000	969000	1272000	1108000	800300	734600	1054000	1042000	959300	761000	1026000
Com_125_neg	Glucotropaeolin	½ðÁ«ÆÏÌÇÁòÜÕ	C14H19NO9S2	409.4	0.98	Carbohydrates And Its Derivatives	ÌÇÀà¼°ÆäÑÜÉúÎï	"499-26-3"	100800	108500	131700	122500	76390	106700	101600	71160	70150	89300	119700	98480
Com_126_neg	Diflunisal	¶þ·úÄáÁø	C13H8F2O3	250.2	13.67	Benzene and substituted derivatives	±½¼°ÆäÈ¡´úÑÜÉúÎï	"22494-42-4"	220200	226600	224300	221300	224700	225300	232000	221200	238800	191800	212300	222300
Com_127_neg	Hexadecanedioate	Ê®ÁùÍé¶þËá	C16H30O4	286.41	11.86	Fatty Acyls	Ö¬·¾õ£Àà	"505-54-4"	54840	41260	62530	67550	69940	38060	50200	85250	62490	68360	65650	63480
Com_128_neg	Hydroxyhydroquinone	Æ«±½Èý·Ó	C6H6O3	126.11	0.92	Phenols And Its Derivatives	·ÓÀà¼°ÆäÑÜÉúÎï	"533-73-3"	116200	104900	125100	98020	137200	158600	118100	149500	144100	98620	118500	146900
Com_129_neg	3-Phosphoglyceric acid	3-Á×Ëá¸ÊÓÍËá	C3H8NaO6P	194.056	1.03	Carbohydrates And Its Derivatives	ÌÇÀà¼°ÆäÑÜÉúÎï	"17603-42-8"	449400	199700	181600	2011000	802800	213900	3733000	110100	103400	155500	212400	202100
Com_130_neg	5,6-Dihydroxyindole-2-Carboxylic Acid	5,6-¶þôÇ»ùßÅßá-2-ôÈËá	C9H7NO4	193.156	18.52	Indole And Its Derivatives	ßÅßá¼°ÆäÑÜÉúÎï	"4790-08-3"	122300	115900	114400	101000	122000	111800	96510	103700	102400	93640	125100	107600
Com_131_neg	4-Pyridoxic acid	4-ßÁà¤Ëá	C8H9NO4	183.161	2.94	Pyridine And Its Derivatives	ßÁà¤¼°ÆäÑÜÉúÎï	"82-82-6"	630200	64310	73420	332900	269200	130400	108500	312900	525400	186600	245200	280100
Com_132_neg	ARCAR	5-°±»ùßäßò-4-¼×õ£°·-1-¦Â-D-ß»à«ºËÌÇÜÕ5-Ò»Á×ËáÑÎ	C9H15N4O8P	338.211	1.06	Nucleotide And Its Derivates	ºËÜÕËá¼°ÆäÑÜÉúÎï	"3031-94-5"	1057000	631300	1213000	945770	993400	855000	714200	1219000	1242000	663300	763400	918300
Com_133_neg	APS	5'-ÏÙÜÕËáÁòËá(APS)	C10H14N5O10PS	427.284	1.05	Nucleotide And Its Derivates	ºËÜÕËá¼°ÆäÑÜÉúÎï	"485-84-7"	33390000	12660000	11490000	16340000	4135000	6475000	399300	418100	628100	11380000	12800000	10340000
Com_134_neg	5-Phosphoribosyl 1-pyrophosphate	5-Á×ËáºËÌÇ»ù-1-½¹Á×Ëá	C5H13O14P3	196.25	1.01	Carbohydrates And Its Derivatives	ÌÇÀà¼°ÆäÑÜÉúÎï	"97-55-2"	48940	39460	127700	275800	22550	215200	19880	41650	28330	88790	99620	92440
Com_135_neg	2-Phenylbutyric acid	2-±½»ù¶¡Ëá	C10H12O2	164.2	1.83	Benzene and substituted derivatives	±½¼°ÆäÈ¡´úÑÜÉúÎï	"90-27-7"	363600	137900	119900	218600	361500	220100	441200	336900	389300	200100	293400	324900
Com_136_neg	Galactaric acid	Õ³Ëá	C6H10O8	210.14	0.9	Sugar Acids And Its Derivatives	ÌÇËá¼°ÆäÑÜÉúÎï	"526-99-8"	57650	66190	66750	78020	46380	37090	83750	54630	88550	53720	67620	67000
Com_137_neg	6-keto PGE1	6-ÍªPGE1	C20H32O6	368.5	0.9	Eicosanoid	Ñõ»¯Ö¬ÖÊ	"67786-53-2"	12290	13300	18300	38360	14160	66720	49180	95520	18650	56850	34730	23700
Com_138_neg	Pimelic acid	¸ý¶þËá	C7H12O4	160.17	5.77	Fatty Acyls	Ö¬·¾õ£Àà	"111-16-0"	372200	235200	272900	412300	303600	267900	361200	226800	268100	238600	289600	332500
Com_139_neg	Palmitaldehyde	×ØéµÈ©	C16H32O	240.42	10.19	Fatty Acyls	Ö¬·¾õ£Àà	"629-80-1"	850000	843500	926700	900800	997000	1024000	934400	980600	1165000	2225000	3166000	3548000
Com_140_neg	Ribulose-5-phosphate	ºËÍªÌÇ-5-Á×Ëá	C5H11O8P	230.02	0.93	Carbohydrates And Its Derivatives	ÌÇÀà¼°ÆäÑÜÉúÎï		2206000	1913000	2528000	2057000	5445000	3776000	4064000	9363000	8373000	3335000	3565000	3886000
Com_141_neg	Taurocholic acid	Å£»Çµ¨Ëá	C26H45NO7S	515.7	8.09	Bile Acids	µ¨Ö­Ëá	"81-24-3"	16530	15820	80660	12600	41450	20250	42160	24260	10680	23720	23970	31070
Com_142_neg	Cytidine 5'-Monophosphate-N-Acetylneuraminic Acid	CMP-ÍÙÒºËáµ¥ÄÆÑÎ	C20H30N4NaO16P	636.433	1.11	Pyrimidines and pyrimidine derivatives	à×à¤¼°ÆäÑÜÉúÎï	"3063-71-6"	22490	10430	26670	35010	91920	47350	47320	25890	35380	23560	43980	42690
Com_143_neg	Dl-2-Amino-3-phosphonopropionic acid	DL-2-°±»ù-3-Á×±ûËá	C3H8NO5P	169.073	18.32	Amino Acid And Its Derivatives	°±»ùËá¼°ÆäÑÜÉúÎï	"20263-06-3"	53150	51460	52150	50690	54270	52890	60510	58010	58810	46020	55080	65480
Com_144_neg	D-Mannose	D-¸ÊÂ¶ÌÇ	C6H12O6	180.156	1.41	Carbohydrates And Its Derivatives	ÌÇÀà¼°ÆäÑÜÉúÎï	"3458-28-4"	163200	119600	92900	212200	65730	59550	60730	62660	56750	147700	93190	71490
Com_145_neg	dTMP	¶þÁ×ËáÍÑÑõÐØÜÕ	C10H15N2O8P	322.208	2.14	Nucleotide And Its Derivates	ºËÜÕËá¼°ÆäÑÜÉúÎï	"365-07-1"	24680	74030	42450	21940	76190	41710	64140	65420	66930	46030	49140	47480
Com_146_neg	N-acetyl-L-ornithine	N-ÒÒõ£-L-Äñ°±Ëá	C7H14N2O3	174.198	0.896	Amino Acid And Its Derivatives	°±»ùËá¼°ÆäÑÜÉúÎï	"6205-08-9"	157100	154200	164000	162600	225400	270700	283300	273800	200300	137900	164500	267200
Com_147_neg	Aminomalonic acid	°±»ù±û¶þËá	C3H5NO4	119.08	0.88	Organic Acid And Its Derivatives	ÓÐ»úËá¼°ÆäÑÜÉúÎï	"1068-84-4"	109900	45300	46810	111000	147300	120000	86360	50260	84950	95870	89370	85550
Com_148_neg	TPP	½¹Á×ËáÁò°·ËØ	C12H19ClN4O7P2S	460.77	0.915	Co-Enzyme Factor	¸¨Ã¸Òò×Ó	"154-87-0"	100200	69980	66610	66950	142300	59030	219400	146300	139100	109800	98330	112100
Com_149_neg	Homoarginine	¸ß¾«°±Ëá	C7H16N4O2	188.23	0.807	Amino Acid And Its Derivatives	°±»ùËá¼°ÆäÑÜÉúÎï	"156-86-5"	216800	163200	79200	149800	234200	177700	239400	257000	123600	170900	150800	136200
Com_150_neg	Creatine phosphate disodium salt	Á×Ëá¼¡Ëá	C4H8N3Na2O5P	255.08	0.93	Organic Acid And Its Derivatives	ÓÐ»úËá¼°ÆäÑÜÉúÎï	"922-32-7"	443700	93120	115200	1208000	81540	120800	2451000	1061000	124200	227100	212400	220300
Com_151_neg	Tetradecanedioic acid	Ê®ËÄÍé¶þËá	C14H26O4	258.35	10.673	Fatty Acyls	Ö¬·¾õ£Àà	"821-38-5"	71170	68540	71860	72340	74120	67940	72560	73790	75480	69650	75170	80460
Com_152_neg	Taurine	Å£»ÇËá	C2H7NO3S	125.15	0.865	Organic Acid And Its Derivatives	ÓÐ»úËá¼°ÆäÑÜÉúÎï	"107-35-7"	32410000	16860000	53520000	23800000	14990000	27930000	16940000	49380000	48050000	23200000	27780000	33980000
Com_153_neg	N-Acetyl-DL-phenylalanine	N-ÒÒõ£-DL-±½±û°±Ëá	C11H13NO3	207.226	6.85	Amino Acid And Its Derivatives	°±»ùËá¼°ÆäÑÜÉúÎï	"2901-75-9"	122500	62000	82990	64520	98430	76610	81580	53720	71620	60150	71830	77200
Com_154_neg	Sulfoacetic acid	»Ç»ùÒÒËá	C2H4O5S	140.115	0.95	Organic Acid And Its Derivatives	ÓÐ»úËá¼°ÆäÑÜÉúÎï	"123-43-3"	63420	75260	69630	103400	85930	70240	89630	92260	132500	65000	93560	121200
Com_155_neg	Thymidine 5'-diphosphate	ÐØÜÕ-5¡¯-¶þÁ×Ëá	C10H16N2O11P2	402.188	0.69	Nucleotide And Its Derivates	ºËÜÕËá¼°ÆäÑÜÉúÎï		38470	50580	37640	36720	53330	49480	56030	58440	55140	49230	40260	65250
Com_156_neg	UDP-N-Acetyl-Alpha-D-Mannosamine	¶þÁ×ËáÄòÜÕ-N-ÒÒõ£°±»ùÆÏÌÑÌÇ	C17H27N3O17P2	607.354	0.96	Nucleotide And Its Derivates	ºËÜÕËá¼°ÆäÑÜÉúÎï	"26575-17-7"	18070000	9570000	25590000	15560000	22040000	13190000	15440000	14990000	11970000	11260000	12820000	17070000
Com_157_neg	Uric Acid	ÄòËá	C5H4N4O3	168.11	1.14	Organic Acid And Its Derivatives	ÓÐ»úËá¼°ÆäÑÜÉúÎï	"69-93-2"	1160000	441600	1989000	595300	972200	671400	1012000	798500	1237000	1104000	978500	1134000
Com_158_neg	Ribose 1-phosphate	ºËÌÇ1-Á×Ëá	C5H11O8P	230.11	0.9	Carbohydrates And Its Derivatives	ÌÇÀà¼°ÆäÑÜÉúÎï	"14075-00-4"	3862000	3138000	4288000	2895000	10000000	6080000	7396000	17310000	17390000	6094000	5711000	6572000
Com_159_neg	Sedoheptulose 7-phosphate	7-Á×Ëá¾°Ìì¸ýÌÇ	C7H13BaO10P	425.473	0.87	Carbohydrates And Its Derivatives	ÌÇÀà¼°ÆäÑÜÉúÎï	"2646-35-7"	122700	133600	175600	178400	152300	225900	279800	356400	301600	177800	178900	181400
Com_160_neg	Sedoheptulose 1,7-bisphosphate	1,7-¶þÁ×Ëá»¯¾°Ìì¸ýÍªÌÇ	C7H16O13P2	370.142	0.88	Organic Acid And Its Derivatives	ÓÐ»úËá¼°ÆäÑÜÉúÎï	"815-91-8"	161500	3450000	2458000	129500	93080	115300	374839	197300	122700	962900	908600	891100
Com_161_neg	dGDP	¶þÁ×ËáÍÑÑõÄñÜÕ	C10H15N5O10P2	427.201	1.08	Nucleotide And Its Derivates	ºËÜÕËá¼°ÆäÑÜÉúÎï	"3493-09-2"	25240000	8503000	8172000	12590000	3574000	5237000	129300	138500	246500	8691000	9121000	8332000
Com_162_neg	D-Galactonic acid	D-°ëÈéÌÇËá	C6H12O7	196.155	0.92	Organic Acid And Its Derivatives	ÓÐ»úËá¼°ÆäÑÜÉúÎï	"13382-27-9"	38560	54200	45080	40410	61090	59180	80590	50890	108200	56810	64520	67700
Com_163_neg	D-Gluconic acid	D-ÆÏÌÑÌÇËá	C6H12O7	196.155	0.91	Sugar Acids And Its Derivatives	ÌÇËá¼°ÆäÑÜÉúÎï	"526-95-4"	112100	97200	89190	82210	144900	109600	172600	147500	225500	126000	124200	137800
Com_164_neg	D-Glucarate	ÆÏÌÑÌÇ¶þËá	C6H10O8	210.139	0.82	Carbohydrates And Its Derivatives	ÌÇÀà¼°ÆäÑÜÉúÎï	"87-73-0"	17510	18660	21520	19380	27190	22680	26030	29710	28000	13020	19930	28160
Com_165_neg	UDP	ÄòÜÕ¶þÁ×Ëá	C9H14N2O12P2	404.16	0.7	Nucleotide And Its Derivates	ºËÜÕËá¼°ÆäÑÜÉúÎï	"58-98-0"	1140000	1639000	1031000	1216000	1262000	1033000	1824000	944500	874300	1367000	1356000	1546000
Com_166_neg	D-Erythrose 4-phosphate	D-³àÞºÌÇ-4-Á×Ëá	C4H9O7P	200.084	0.95	Carbohydrates And Its Derivatives	ÌÇÀà¼°ÆäÑÜÉúÎï	"585-18-2"	13940000	299400000	222000000	19620000	31800000	11720000	17350000	4678000	3290000	93170000	94350000	108900000
Com_167_neg	D-Fructose 1,6-bisphosphate	D-¹ûÌÇ-1,6-¶þÁ×Ëá	C6H14O12P2	340.116	0.86	Sugar Acids And Its Derivatives	ÌÇËá¼°ÆäÑÜÉúÎï	"488-69-7"	2547000	1425000	1076000	7981000	1428000	693300	1647000	404900	262600	1698000	1643000	1324000
Com_168_neg	dATP	ÍÑÑõÈýÁ×ËáÏÙÜÕ	C10H16N5O12P3	491.001	0.73	Nucleotide And Its Derivates	ºËÜÕËá¼°ÆäÑÜÉúÎï	"1927-31-7"	13780	19770	15200	12120	21190	16700	18510	8401	13110	15660	18480	15890
Com_169_neg	1,3 bisphosphoglycerate	1,3-¸ÊÓÍ¶þõ¥	C3H8O10P2	266.04	12.04	Glycerolipids	¸ÊÓÍÖ¬Àà		81540	75230	116900	83680	66840	79630	65230	47450	58900	83050	62220	44120
Com_170_neg	Octanedioic acid	ÐÁ¶þËá	C8H14O4	174.19	6.649	Organic Acid And Its Derivatives	ÓÐ»úËá¼°ÆäÑÜÉúÎï	"505-48-6"	89660	92520	89050	90900	99560	95740	89560	105500	78810	83280	98160	93940
Com_171_neg	N-Acetyl-D-glucosamine	N-ÒÒõ£-D-°±»ùÆÏÌÑÌÇ	C8H15NO6	221.208	0.984	Carbohydrates And Its Derivatives	ÌÇÀà¼°ÆäÑÜÉúÎï	"7512-17-6"	4388	3415	5717	4741	4915	4908	4428	4355	4963	3918	4658	5434
Com_172_neg	2-Hydroxybutyric acid	2-ôÇ»ù¶¡Ëá	C4H8O3	104.1	2.741	Organic Acid And Its Derivatives	ÓÐ»úËá¼°ÆäÑÜÉúÎï	"600-15-7"	732700	554000	625600	639200	982800	298700	535500	468600	480000	485500	617800	698100
Com_173_neg	N-Acetyl-L-methionine	N-ÒÒõ£-L-µ°°±Ëá	C7H13NO3S	191.25	5.315	Amino Acid And Its Derivatives	°±»ùËá¼°ÆäÑÜÉúÎï	"65-82-7"	15090	12810	14310	16720	19390	15430	22220	23170	27280	16380	16520	17490
Com_174_neg	(R)-3-Hydroxyisobutyric acid	(R)-3-ôÇ»ùÒì¶¡Ëá	C4H8O3	104.104	2.37	Organic Acid And Its Derivatives	ÓÐ»úËá¼°ÆäÑÜÉúÎï	"1910-47-0"	399100	365100	546300	805600	871500	322700	768600	507900	399500	438900	500100	543300
Com_175_neg	2-Hydroxybutanoic acid	(S)-2-ôÇ»ù¶¡Ëá	C4H8O3	104.104	2.64	Organic Acid And Its Derivatives	ÓÐ»úËá¼°ÆäÑÜÉúÎï	"3347-90-8"	508500	413400	511100	513800	693500	242300	410300	314100	373500	375600	424200	477700
Com_176_neg	N-Acetyl-L-tyrosine	N-ÒÒõ£-L-ÀÒ°±Ëá	C11H13NO4	223.23	5.17	Amino Acid And Its Derivatives	°±»ùËá¼°ÆäÑÜÉúÎï	"537-55-3"	32460	10870	15460	19810	15730	8128	26770	19250	15750	15550	17600	18090
Com_177_neg	Itaconic acid	ÒÂ¿µËá	C5H6O4	130.1	1.45	Fatty Acyls	Ö¬·¾õ£Àà	"97-65-4"	104500	94920	102200	96060	112300	44190	88060	97230	92210	86590	93470	110000
Com_178_neg	Pyridoxal 5-phosphate monohydrate	5-Á×ËáßÁ¶ßÈ©	C8H12NO7P	265.16	1.7	Vitamins	Î¬ÉúËØ	"41468-25-1"	2583000	2694000	2551000	2732000	3425000	2244000	2011000	2330000	1957000	2083000	2048000	2333000
Com_179_neg	DL-Serine	DL-Ë¿°±Ëá	C3H7NO3	105.09	0.83	Amino Acid And Its Derivatives	°±»ùËá¼°ÆäÑÜÉúÎï	"302-84-1"	484400	347500	918000	1273000	676900	1212000	794200	1044000	1459000	720100	1013000	1245000
Com_180_neg	Irbesartan	¶ò±´É³Ì¹	C25H28N6O	428.529	1.04	Benzene and substituted derivatives	±½¼°ÆäÑÜÉúÎï	"138402-11-6"	77890	34820	41390	34440	45260	16450	22560	19530	28350	29200	47910	34780
Com_181_neg	Hydroquinone	¶Ô±½¶þ·Ó	C6H6O2	110.111	4.79	Phenols And Its Derivatives	·ÓÀà¼°ÆäÑÜÉúÎï	"123-31-9"	7440	16600	4974	8594	3162	19590	4099	13130	12000	8200	6663	6501
Com_182_neg	Calcium D-Panthotenate	D-·ºËá¸Æ	C18H32CaN2O10	476.53	4.59	Vitamins	Î¬ÉúËØ	"137-08-6"	34650000	31370000	22190000	28290000	19410000	30130000	34020000	33560000	30120000	25090000	26600000	29560000
Com_183_neg	L-Arabinose	°¢À­²®ÌÇ	C5H10O5	150.13	0.9	Carbohydrates And Its Derivatives	ÌÇÀà¼°ÆäÑÜÉúÎï	"5328-37-0"	15020	9976	17830	13100	15050	16360	14690	17570	20310	9416	13200	12630
Com_184_neg	D-3-Phenyllactic acid	D-3-±½ÈéËá	C9H10O3	166.17	6.77	Organic Acid And Its Derivatives	ÓÐ»úËá¼°ÆäÑÜÉúÎï	"7326-19-4"	259500	264800	118200	211500	220300	414500	287900	245600	199600	201900	209500	238800
Com_185_neg	L-Glutamic acid monosodium salt	¹È°±ËáÄÆ	C5H8NNaO4	169.11	0.86	Amino Acid And Its Derivatives	°±»ùËá¼°ÆäÑÜÉúÎï	"142-47-2"	1917000	847000	1623000	1896000	1415000	1376000	1135000	2207000	2095000	1616000	1436000	1315000
Com_186_neg	L(+)-Asparagine monohydrate	L-Ìì¶¬õ£°·Ò»Ë®Îï	C4H8N2O3.H2O	150.13	0.83	Amino Acid And Its Derivatives	°±»ùËá¼°ÆäÑÜÉúÎï	"5794-13-8"	324500	215800	361800	730400	250800	746300	486700	1019000	1050000	425600	624600	874500
Com_187_neg	Cytidine-5'-monophosphate	°ûÜÕ-5-µ¥Á×Ëá	C9H14N3O8P	323.197	0.97	Nucleotide And Its Derivates	ºËÜÕËá¼°ÆäÑÜÉúÎï	"63-37-6"	61070	128800	150200	24750	250600	144800	201300	299100	204400	167000	178300	161100
Com_188_neg	L-Pyroglutamic acid	½¹¹È°±Ëá	C5H7NO3	129.11	1.689	Organic Acid And Its Derivatives	ÓÐ»úËá¼°ÆäÑÜÉúÎï	"98-79-3"	64910	132500	78370	69130	83970	67140	184900	106600	110900	93090	97890	117400
Com_189_neg	Citric acid	ÄûÃÊËá	C6H8O7	192.12	1.516	Tca Cycle	ÈýôÈËáÑ­»·	"77-92-9"	11810000	5125000	8521000	4956000	7737000	1479000	4356000	6714000	7372000	4272000	5675000	7023000
Com_190_neg	DL-Norepinephrine	DL-È¥¼×ÉöÉÏÏÙËØ	C8H12ClNO3	205.639	0.917	Hormones	¼¤ËØ	"55-27-6"	80060	27170	138100	35690	48320	66440	36970	69380	47820	41700	48760	43570
Com_191_neg	Lactobionic acid	ÈéÌÇËá	C12H22O12	358.3	0.91	Carbohydrates And Its Derivatives	ÌÇÀà¼°ÆäÑÜÉúÎï	"96-82-2"	31620	9715	29910	49380	19670	17710	8430	10790	18920	21870	18030	20360
Com_192_neg	Fumaric acid	ÑÓºúË÷Ëá	C4H4O4	116.07	1.82	Tca Cycle	ÈýôÈËáÑ­»·	"110-17-8"	483000	472100	382700	545800	763400	544900	417200	819000	343000	337900	408300	464700
Com_193_neg	L-Arabinitol	L-(-)-°¢À­²®´¼	C5H12O5	152.15	0.925	Sugar Alcohols	ÌÇ´¼	"7643-75-6"	5475	9429	6682	6588	7618	6671	4639	8139	7111	7417	8671	3032
Com_194_neg	Taurohyocholic acid sodium salt	Å£»ÇÖíµ¨ËáÄÆÑÎ	C26H44NNaO7S	537.69	9.03	Bile Acids	µ¨Ö­Ëá		342200	370800	2122000	236700	1417000	215000	932900	135000	224100	545000	601200	617000
Com_195_neg	L-(-)-Glyceric acid	L-¸ÊÓÍËá	C3H6O4	106.077	1.0	Sugar Acids And Its Derivatives	ÌÇËá¼°ÆäÑÜÉúÎï	"28305-26-2"	143100	179900	172300	83670	137900	99290	193300	166500	70050	158600	179000	142400
Com_196_neg	Lactic acid	ÈéËá	C3H6O3	90.078	1.44	Organic Acid And Its Derivatives	ÓÐ»úËá¼°ÆäÑÜÉúÎï	"50-21-5"	46100000	61410000	53570000	56010000	63200000	61750000	65520000	62140000	54100000	47940000	50220000	56740000
Com_197_neg	L-Cysteinesulfinic acid	L-°ëë×ÑÇ»ÇËá	C3H7NO4S	153.16	0.88	Organic Acid And Its Derivatives	ÓÐ»úËá¼°ÆäÑÜÉúÎï	"1115-65-7"	25110	3653	7110	6573	9221	4047	18590	27160	49320	8454	5592	7239
Com_198_neg	L-Homocystine	L-¸ßë×°±Ëá	C8H16N2O4S2	268.354	0.83	Amino Acid And Its Derivatives	°±»ùËá¼°ÆäÑÜÉúÎï	"626-72-2"	7812	15120	27560	7133	15150	12150	13680	14960	16430	9314	8329	9661
Com_199_neg	Linolelaidic Acid (C18:2N6T)	·´ÑÇÓÍËá	C18H32O2	280.445	15.16	Fatty Acyls	Ö¬·¾õ£Àà	"506-21-8"	21520	32550	36670	32020	81590	37620	40110	99890	77630	38780	68350	43560
Com_200_neg	Lysopa 16:0	ÈÜÑªÂÑÁ×Ö¬Ëá16:0	C19H39O7P	410.48	12.54	Phospholipid	Á×Ö¬		9973	5952	9591	6070	15600	5158	10400	11360	11010	6064	7549	8100
Com_201_neg	Lysope 14:0	ÈÜÑªÂÑÁ×Ö¬õ£ÒÒ´¼°·14:0	C19H40NO7P	425.5	11.27	Phospholipid	Á×Ö¬		4294	4966	2680	1859	2058	4862	2626	3837	2555	2875	2335	2669
Com_202_neg	Lysope 16:0	ÈÜÑªÂÑÁ×Ö¬õ£ÒÒ´¼°·16:0	C21H44NO7P	453.55	12.48	Phospholipid	Á×Ö¬		753700	321500	878100	663100	1098000	671100	708700	744700	894400	523900	513700	504100
Com_203_neg	LysoPE 18:0	ÈÜÑªÁ×Ö¬õ£ÒÒ´¼°· 18:0	C23H48NO7P	481.6	13.73	Phospholipid	Á×Ö¬	"69747-55-3"	1243000	453000	1389000	1252000	1158000	1206000	498300	1523000	1355000	399000	418500	507200
Com_204_neg	PE(18:1(9Z)/0:0)	PE(18:1(9Z)/0:0)	C23H46NO7P	479.6	12.85	Glycerolipids	¸ÊÓÍÖ¬Àà	"89576-29-4"	471200	220000	579700	554200	634200	412700	471000	614700	474700	458900	452200	478500
Com_205_neg	4-Hydroxyphenyllactate	¶ÔôÇ»ù±½ÈéËá	C9H10O4	182.173	5.02	Organic Acid And Its Derivatives	ÓÐ»úËá¼°ÆäÑÜÉúÎï	"6482-98-0"	243200	176200	93270	197300	199600	120100	342800	294900	145500	174500	184200	201900
Com_206_neg	D-Glucosamine 6-phosphate	D-°±»ùÆÏÌÑÌÇ-6-Á×Ëá	C6H14NO8P	259.151	0.86	Sugar Acids And Its Derivatives	ÌÇËá¼°ÆäÑÜÉúÎï	"3616-42-0"	589300	304600	551600	280700	286200	707600	381900	726900	382900	424700	369700	409400
Com_207_neg	2-Hydroxy-2-methylbutanedioic acid	2-ôÇ»ù-2-¼×»ù¶¡¶þËá	C5H8O5	148.114	1.5	Fatty Acyls	Ö¬·¾õ£Àà	"597-44-4"	62880	59790	59570	101300	46510	31820	55680	59810	66760	50260	50040	58660
Com_208_neg	3-(2-Naphthyl)-D-Alanine	3-(2-ÝÁ»ù)-D-±û°±Ëá	C13H13NO2	215.248	6.22	Amino Acid And Its Derivatives	°±»ùËá¼°ÆäÑÜÉúÎï	"76985-09-6"	29300	21110	56400	55070	57620	46280	29910	45560	46150	69780	61570	73120
Com_209_neg	dADP	2'-ÍÑÑõÏÙÜÕ-5'-¶þÁ×Ëá	C10H15N5O9P2	411.202	0.75	Nucleotide And Its Derivates	ºËÜÕËá¼°ÆäÑÜÉúÎï	"2793-06-8"	59800	53710	58400	51130	56290	64200	46290	55110	55770	34520	60070	61160
Com_210_neg	2-deoxyglucose-6-phosphate	6-Á×Ëá-2-ÍÑÑõÆÏÌÑÌÇ	C6H13O8P	244.136	0.98	Nucleotide And Its Derivates	ºËÜÕËá¼°ÆäÑÜÉúÎï	"3573-50-0"	400800	254900	475300	422700	312000	730900	398300	1127000	898600	355600	505200	575100
Com_211_neg	dGTP	2'-ÍÑÑõÄñÜÕ5'-ÈýÁ×Ëá	C10H16N5O13P3	507.181	1.1	Nucleotide And Its Derivates	ºËÜÕËá¼°ÆäÑÜÉúÎï	"2564-35-4"	21650000	405000	346800	45890000	69370	121900	60080	48120	9961	650900	571600	810500
Com_212_neg	3-Methylsalicylate	3-¼×·Ó»ÇËá	C8H8O3	152.147	0.71	Benzene and substituted derivatives	±½¼°ÆäÑÜÉúÎï	"83-40-9"	214600	242300	357600	115100	225000	300300	237600	234800	309900	248400	199100	231900
Com_213_neg	Traumatic acid	·´Ê½-2-Ê®¶þÌ¼Ï©¶þËá	C12H20O4	228.28	9.19	Fatty Acyls	Ö¬·¾õ£Àà	"6402-36-4"	376300	382900	350300	394200	382300	383900	374700	369600	399300	397200	363600	381600
Com_214_neg	2-Hydroxy-2-methylbutanoic acid	2-ôÇ»ù-2-¼×»ù¶¡Ëá	C5H10O3	118.13	4.61	Fatty Acyls	Ö¬·¾õ£Àà	"3739-30-8"	39350	60030	66840	38330	78420	120900	36150	46720	111300	52360	59250	66410
Com_215_neg	Pyridoxal 5'-phosphate hydrate	3-ôÇ»ù-2-¼×»ù-5-Á×õ£Ñõ¼×»ù-4-ßÁà¤¼×È©	C8H10NO6P	247.14	1.63	Pyridine And Its Derivatives	ßÁà¤¼°ÆäÑÜÉúÎï	"853645-22-4"	168300	167400	159100	140300	200500	136900	124000	129100	122400	117500	130800	132700
Com_216_neg	Quinic acid	¿üÄáËá	C7H12O6	192.17	0.998	Organic Acid And Its Derivatives	ÓÐ»úËá¼°ÆäÑÜÉúÎï	"77-95-2"	268400	231800	234117	288100	120500	159800	193900	340100	163000	314200	296500	230400
Com_217_neg	Inositol	¼¡´¼	C6H12O6	180.16	0.85	Phenols And Its Derivatives	·ÓÀà¼°ÆäÑÜÉúÎï	"87-89-8"	130400	108700	220600	220500	106100	163800	148700	303600	303000	130600	203400	282200
Com_218_neg	2,4-Dihydroxybenzoic Acid	2,4-¶þôÇ»ù±½¼×Ëá	C7H6O4	154.12	1.7	Benzoic Acid And Its Derivatives	±½¼×Ëá¼°ÆäÑÜÉúÎï	"89-86-1"	4613	4781	6023	5029	6490	4505	7025	5971	5822	4768	5237	3067
Com_219_neg	Linoleic acid	ÑÇÓÍËá(C18:2)	C18H32O2	280.4	15.19	Fatty Acyls	Ö¬·¾õ£Àà	"60-33-3"	27680	33030	42230	40280	45110	27100	42500	109600	73230	40760	57940	43450
Com_220_neg	gamma-Linolenic acid	¦Ã-ÑÇÂéËá(C18:3)	C18H30O2	278.4	12.03	Fatty Acyls	Ö¬·¾õ£Àà	"506-26-3"	225500	210400	209000	198400	178100	178100	177200	179300	159900	253600	182600	153100
Com_221_neg	Trans,Trans-Muconic Acid	·´,·´-Õ³¿µËá	C6H6O4	142.11	0.96	Fatty Acyls	Ö¬·¾õ£Àà	"3588-17-8"	6091	5313	7646	9100	5025	8032	8586	10580	6987	7032	6333	9925
Com_222_neg	5-Hydroxyhexanoic Acid	5-ôÇ»ù¼ºËá	C6H12O3	132.16	6.36	Fatty Acyls	Ö¬·¾õ£Àà	"185956-02-9"	71490	52720	54160	98100	84620	105200	60710	66950	75340	64290	71040	68290
Com_223_neg	Cis-4,7,10,13,16,19-Docosahexaenoic Acid(C22:6N3)	Ë³Ê½-4,7,10,13,16,19-¶þÊ®¶þÌ¼ÁùÏ©Ëá	C22H32O2	328.5	14.89	Fatty Acyls	Ö¬·¾õ£Àà	"6217-54-5"	31450	31020	38430	54700	36410	44260	45630	39030	48430	40710	44220	44980
Com_224_neg	Adenosine5-phosphosulfate	ÏÙÜÕ5-Á×õ£ÁòËá¶þÄÆÑÎ	C10H13N5NaO10PS	449.266	1.04	Nucleotide And Its Derivates	ºËÜÕËá¼°ÆäÑÜÉúÎï	"102029-95-8"	68460	29500	41120	42290	16490	31510	11340	33795	35660	30130	21470	16060
Com_225_neg	Adenosine5'-diphosphoglucose	5'-¶þÁ×ËáÆÏÌÑÌÇÏÙÜÕ¶þÄÆÑÎ	C16H23N5Na2O15P2	633.305	1.02	Nucleotide And Its Derivates	ºËÜÕËá¼°ÆäÑÜÉúÎï	"102129-65-7"	20710	56950	12180	20290	33230	38380	35700	36330	55100	30320	28450	35290
Com_226_neg	Adenosine 5'-Diphosphate	¶þÁ×ËáÏÙÜÕ	C10H15N5O10P2	427.201	1.04	Nucleotide And Its Derivates	ºËÜÕËá¼°ÆäÑÜÉúÎï	"58-64-0"	32540000	11730000	10860000	17790000	4577000	7111000	284500	382200	399000	14690000	12100000	9685000
Com_227_neg	8,15-Dihete	8,15-¶þôÇ»ù¶þÊ®Ì¼ËÄÏ©Ëá	C20H32O4	336.466	7.14	Eicosanoid	Ñõ»¯Ö¬ÖÊ	"80234-65-7"	3292	2903	3935	5927	4436	4565	5206	3615	4040	6224	5732	6504
Com_228_neg	5-Methyl-dl-tryptophan	5-¼×»ù-DL-É«°±Ëá	C12H14N2O2	218.252	4.26	Amino Acid And Its Derivatives	°±»ùËá¼°ÆäÑÜÉúÎï	"951-55-3"	50620	53350	59910	62030	118300	55060	211800	112100	268500	93930	101500	106400
Com_229_neg	5-Hydroxyindole-2-carboxylic acid	5-ôÇ»ùßÅßá-2-¼×Ëá	C9H7NO3	177.157	0.71	Indole And Its Derivatives	ßÅßá¼°ÆäÑÜÉúÎï	"21598-06-1"	313600	279900	328000	333000	303300	262200	294800	343000	285100	311600	261200	353100
Com_230_neg	Guanidinoacetic acid	ëÒ»ùÒÒËá	C3H7N3O2	117.107	1.13	Organic Acid And Its Derivatives	ÓÐ»úËá¼°ÆäÑÜÉúÎï	"352-97-6"	37590	16270	34050	19550	24850	21830	9243	25420	21350	28730	12380	14240
Com_231_neg	D-Fructose 6-phosphate	D-¹ûÌÇ-6-Á×Ëá	C6H13O9P	260.03	0.87	Carbohydrates And Its Derivatives	ÌÇÀà¼°ÆäÑÜÉúÎï	"643-13-0"	173100000	184600000	51430000	219500000	289100000	146200000	230800000	74760000	59680000	151100000	159900000	167700000
Com_232_neg	5-oxoproline	5-Ñõ»¯¸¬°±Ëá	C5H7NO3	129.043	1.63	Amino Acid And Its Derivatives	°±»ùËá¼°ÆäÑÜÉúÎï	"149-87-1"	48870	98540	55500	47270	61440	56250	145100	75030	81190	65540	84080	68970
Com_233_neg	Deoxycytidine	ÍÑÑõ°ûÜÕ	C9H13N3O4	227.091	1.81	Nucleotide And Its Derivates	ºËÜÕËá¼°ÆäÑÜÉúÎï	"951-77-9"	50310	20110	28740	29740	37680	23410	49070	44210	46630	38940	29960	32880
Com_234_neg	UDP-D-glucose	ÄòÜÕ 5'-¶þÁ×ËáÆÏÌÑÌÇ	C15H24N2O17P2	566.1	0.95	Carbohydrates And Its Derivatives	ÌÇÀà¼°ÆäÑÜÉúÎï	"133-89-1"	2181000	3461000	3643000	3653000	2970000	2036000	1701000	2570000	3030000	1520000	2480000	3056000
Com_235_neg	12,13-EODE	12,13-»·ÑõÊ®°ËÌ¼¶þÏ©Ëá	C18H32O3	296.0	12.67	Eicosanoid	Ñõ»¯Ö¬ÖÊ		35160	26390	63470	40680	66530	15500	73220	100100	86340	56870	57480	58360
Com_236_neg	Sodium cholate	µ¨ËáÄÆ	C24H39NaO5	430.55	10.34	Bile Acids	µ¨Ö­Ëá	"361-09-1"	3400	4025	2490	3095	3263	4633	2334	2146	6310	13100	8103	5474
Com_237_neg	Tropolone	»·¸ýÈýÏ©·ÓÍª	C7H6O2	122.12	7.39	Ketones	ÍªÀà	"533-75-5"	130300	130300	125800	121200	145100	134000	108100	194000	102500	151300	164500	181000
Com_238_neg	Bisphenol A	Ë«·ÓA	C15H16O2	228.29	9.58	Phenols And Its Derivatives	·ÓÀà¼°ÆäÑÜÉúÎï	"80-05-7"	17880	15240	14900	14520	19390	13090	13980	17330	14770	17550	15130	16150
Com_239_neg	Cyclohexaneacetic acid	»·¼º»ùÒÒËá	C8H14O2	142.2	1.03	Fatty Acyls	Ö¬·¾õ£Àà	"5292-21-7"	395600	686100	331100	967400	384600	759900	406700	794300	707200	381900	450100	912600
Com_240_neg	4-Nitrophenol	4-Ïõ»ù±½·Ó	C6H5NO3	139.11	7.71	Phenols And Its Derivatives	·ÓÀà¼°ÆäÑÜÉúÎï	"100-02-7"	1297000	1379000	1383000	1380000	1280000	1328000	1411000	1472000	1247000	1346000	1218000	1382000
Com_242_neg	CDP	5-°ûÜÕ¶þÁ×Ëá	C9H15N3O11P2	403.176	0.99	Nucleotide And Its Derivates	ºËÜÕËá¼°ÆäÑÜÉúÎï	"63-38-7"	434800	255900	252400	207300	41420	335600	9867	7237	38020	127000	123200	153100
Com_243_neg	N-Methylhydantoin	¼×õ£ÒÒÄÚëå	C4H6N2O2	114.1	1.39	Organoheterocyclic compounds	ÓÐ»úÔÓ»·»¯ºÏÎï	"616-04-6"	3423000	3559000	3664000	3332000	3708000	3072000	2908000	3828000	3092000	3970000	3361000	2605000
Com_244_neg	UDP-D-glucuronate	ÄòÜÕ-5'-¶þÁ×ËáÆÏÌÇÈ©Ëá	C15H22N2O18P2	580.285	0.94	Nucleotide And Its Derivates	ºËÜÕËá¼°ÆäÑÜÉúÎï	"2616-64-0"	490200	188700	435800	546300	311600	175900	141700	132900	65690	275900	277900	221700
Com_245_neg	UDP-galactose	ÄòÜÕ-5'-¶þÁ×Ëá°ëÈéÌÇ	C15H22N2Na2O17P2	610.265	0.92	Nucleotide And Its Derivates	ºËÜÕËá¼°ÆäÑÜÉúÎï	"2956-16-3"	3425000	6018000	6420000	5987000	5204000	3760000	2827000	3921000	5136000	3004000	3900000	5233000
Com_246_neg	geranyl pp	½¹Á×ËáÏãÒ¶õ¥	C10H20O7P2	314.209	0.83	Prenol lipids	Ï©´¼õ¥		12450	14140	16560	5435	16400	12890	16620	27790	20070	12450	13080	13350
Com_247_neg	Glyceraldehyde 3-phosphate diethyl acetal	DL-¸ÊÓÍÈ©Ëõ¶þÒÒ´¼-3-Á×ËáÒ»±µÑÎ	C7H15BaO7P	379.491	0.96	Organic Acid And Its Derivatives	ÓÐ»úËá¼°ÆäÑÜÉúÎï	"93965-35-6"	459500	353000	477200	365700	850100	530700	596200	649100	718400	437500	528400	596000
Com_248_neg	1,2,3-Benzenetricarboxylic acid	1,2,3-±½Èý¼×Ëá	C9H6O6	210.14	6.42	Benzoic Acid And Its Derivatives	±½¼×Ëá¼°ÆäÑÜÉúÎï	"569-51-7"	3708	15600	6713	6731	6080	5728	6715	4026	6826	8173	8902	10430
Com_249_neg	2-Phosphoglyceric acid	2-Á×Ëá¸ÊÓÍËá	C3H7O7P	186.057	0.92	Carbohydrates And Its Derivatives	ÌÇÀà¼°ÆäÑÜÉúÎï	"2553-59-5"	754700	281900	384100	1746000	647800	376400	3463000	171100	144800	291000	296300	288500
Com_250_neg	Citraconic acid	Äû¿µËá	C5H6O4	130.099	1.56	Fatty Acyls	Ö¬·¾õ£Àà	"498-23-7"	358400	269300	354500	296900	350500	142000	251200	257000	282100	227500	242600	259000
Com_251_neg	Citramalate	¼×»ùÆ»¹ûËá	C5H8O5	148.114	1.44	Organic Acid And Its Derivatives	ÓÐ»úËá¼°ÆäÑÜÉúÎï	"2306-22-1"	30910	18720	26270	11080	29000	6021	10980	34910	16910	17850	26290	18370
Com_252_neg	Cyclohexylsulfamate	»·À­Ëá	C6H13NO3S	179.237	1.2	Organic Acid And Its Derivatives	ÓÐ»úËá¼°ÆäÑÜÉúÎï	"100-88-9"	68790	44740	67330	60700	68180	97400	77140	120500	100200	86010	75360	71840
Com_253_neg	Cytidine 3'-phosphate	°ûà¤-3'-µ¥Á×Ëá	C9H14N3O8P	323.197	1.22	Nucleotide And Its Derivates	ºËÜÕËá¼°ÆäÑÜÉúÎï	"84-52-6"	53280	186900	129800	43900	271800	241200	274500	372600	178700	210300	199200	193700
Com_254_neg	D-Arabinose 5-phosphate	D-°¢À­²®ÌÇ5-Á×Ëáõ¥	C5H11O8P	230.11	0.9	Carbohydrates And Its Derivatives	ÌÇÀà¼°ÆäÑÜÉúÎï	"13137-52-5"	3416000	2938000	3987000	2706000	7728000	5988000	6791000	13900000	14660000	5607000	5980000	6065000
Com_255_neg	L-Adrenaline	ÉöÉÏÏÙËØ	C9H13NO3	183.204	1.034	Hormones	¼¤ËØ	"51-43-4"	56950	32170	60110	47750	27780	32450	49439	50300	51480	36530	63950	71950
Com_256_neg	Prostaglandin E2	Ç°ÁÐÏÙËØE2	C20H32O5	352.465	9.378	Hormones	¼¤ËØ	"363-24-6"	4489	3514	32410	6385	14340	4912	10850	19120	13932	10060	11700	9653
Com_257_neg	L-Ascorbate	¿¹»µÑªËá	C6H8O6	176.12	1.03	Vitamins	Î¬ÉúËØ	"50-81-7"	1310000	1055000	2457000	2429000	2502000	1065000	2485000	3886000	1721000	441400	393500	402100
Com_258_neg	4-Amino-5-imidazolecarboxamide	5-°±»ùßäßò-4-ôÈËá°·	C4H6N4O	126.12	0.915	Organoheterocyclic compounds	ÓÐ»úÔÓ»·»¯ºÏÎï	"360-97-4"	12850	11810	28840	13170	10790	16340	10410	28780	25710	11770	13520	22910
Com_259_neg	Xanthine	»ÆàÑßÊ	C5H4N4O2	152.11	1.714	Nucleotide And Its Derivates	ºËÜÕËá¼°ÆäÑÜÉúÎï	"69-89-6"	3392000	1530000	3819000	1901000	3017000	1541000	2676000	2440000	4195000	2078000	2441000	3054000
Com_260_neg	4-Hydroxybenzoic acid	4-ôÇ»ù±½¼×Ëá	C7H6O3	138.12	5.379	Benzoic Acid And Its Derivatives	±½¼×Ëá¼°ÆäÑÜÉúÎï	"99-96-7"	279100	342300	290300	335600	295000	318300	301400	331900	310400	316400	330400	345700
Com_261_neg	Deoxyinosine	2-ÍÑÑõ¼¡ÜÕ	C10H12N4O4	252.23	3.33	Nucleotide And Its Derivates	ºËÜÕËá¼°ÆäÑÜÉúÎï	"890-38-0"	153200	117200	150400	176800	173100	79650	142700	128000	252300	130600	132200	154000
Com_262_neg	Indoxylsulfuric acid	ßÅßáÁòËá	C8H7NO4S	213.21	5.62	Organic Acid And Its Derivatives	ÓÐ»úËá¼°ÆäÑÜÉúÎï	"487-94-5"	5437	4840	3900	6030	3773	5586	6395	8622	8209	4310	5339	4658
Com_263_neg	Glutaric Acid	Îì¶þËá	C5H8O4	132.115	0.7	Organic Acid And Its Derivatives	ÓÐ»úËá¼°ÆäÑÜÉúÎï	"110-94-1"	2824000	2192000	2437000	1533000	1537000	1614000	2725000	1361000	2329000	2136000	1224000	1702000
Com_264_neg	N-Acetyl-Asp-Glu	N-ÒÒõ£-Ìì¶¬°±Ëá-¹È°±Ëá	C11H16N2O8	304.253	2.02	Amino Acid And Its Derivatives	°±»ùËá¼°ÆäÑÜÉúÎï	"3106-85-2"	634600	194700	666400	543900	335800	116300	251600	240300	224100	383800	407200	416200
Com_265_neg	N-lactoyl-phenylalanine	N-Èéõ£»ù±½±û°±Ëá	C12H15NO4	237.25	6.97	Amino Acid And Its Derivatives	°±»ùËá¼°ÆäÑÜÉúÎï		416100	256300	180700	289800	229400	120400	336100	157400	276200	209200	228500	259000
Com_266_neg	Orotidine	ÈéÇåÜÕ	C10H12N2O8	288.211	1.0	Nucleotide And Its Derivates	ºËÜÕËá¼°ÆäÑÜÉúÎï	"314-50-1"	17800	12510	22760	7100	13160	20800	21460	11750	15430	17230	23420	13200
Com_267_neg	NADH	»¹Ô­ÐÍ¸¨Ã¸¢ñ	C21H29N7O14P2	665.441	2.79	Co-Enzyme Factor	¸¨Ã¸Òò×Ó	"58-68-4"	2146000	2166000	1377000	1721000	900600	179900	566700	126500	172400	1191000	1273000	1303000
Com_268_neg	Chenodeoxycholic acid	¶ìÈ¥Ñõµ¨Ëá	C24H40O4	392.57	11.768	Bile Acids	µ¨Ö­Ëá	"474-25-9"	14940	23168	10440	26742	16970	23525	109000	20500	5702	20830	19040	23460
Com_269_neg	Deoxycholic acid	ÍÑÑõµ¨Ëá	C24H40O4	392.57	11.976	Bile Acids	µ¨Ö­Ëá	"83-44-3"	21210	23940	30500	22950	22320	23440	19350	34200	21010	39120	31740	33230
Com_270_neg	lithocholic acid	Ê¯µ¨Ëá	C24H40O3	376.57	11.159	Bile Acids	µ¨Ö­Ëá	"434-13-9"	2167000	1471000	3158000	1995000	1478000	2622000	1893000	2687000	2762000	1766000	1849000	1891000
Com_271_neg	Cholic acid	µ¨Ëá	C24H40O5	408.57	10.361	Bile Acids	µ¨Ö­Ëá	"81-25-4"	32440	78790	64160	18190	79090	3342	274200	12170	17570	52910	52190	54980
Com_272_neg	Tauroursodeoxycholic acid Dihydrate	Å£»ÇÐÜÍÑÑõµ¨Ëá¶þË®ºÏÎï	C26H45NO6S.2H2O	535.7	9.015	Bile Acids	µ¨Ö­Ëá	"14605-22-2"	45740	20980	38240	5079	18550	14350	13060	22177	22270	18440	20840	17210
Com_273_neg	Myristic acid	Èâ¶¹Þ¢Ëá	C14H28O2	228.371	1.03	Fatty Acyls	Ö¬·¾õ£Àà	"544-63-8"	546100	317400	1354000	3940000	589100	2747000	319700	447700	301400	942500	1039000	1024000
Com_274_neg	gamma-Glutamylcysteine	5-L-¹È°±õ£-L-°ëë×°±Ëá	C8H14N2O5S	250.272	1.48	Amino Acid And Its Derivatives	°±»ùËá¼°ÆäÑÜÉúÎï	"636-58-8"	98170	94300	35550	65170	86480	34880	52510	86080	256800	51620	67570	136200
Com_275_neg	Sorbitol	É½Àæ´¼	C6H14O6	182.172	0.91	Sugar Alcohols	ÌÇ´¼	"50-70-4"	16010	25750	20110	34590	26390	22430	14790	12670	15100	22030	17330	8879
Com_276_neg	Taurodeoxycholic acid sodium salt	Å£»ÇÍÑÑõµ¨ËáÄÆÑÎ	C26H44NNaO6S	521.69	10.504	Bile Acids	µ¨Ö­Ëá	"1180-95-6"	1205000	650800	5070000	695100	3290000	827300	3275000	576700	1042000	1643000	1612000	1764000
Com_277_neg	Taurohyodeoxycholic acid sodium salt	Å£»ÇÖíÍÑÑõµ¨ËáÄÆÑÎ	C26H44NNaO6S	521.69	8.928	Bile Acids	µ¨Ö­Ëá	"110026-03-4"	46600	25950	39070	8097	17060	13940	16710	10730	18313	16590	24680	20570
Com_278_neg	L-SelenoMethionine	L-Îø´úµ°°±Ëá	C5H11NO2Se	196.11	18.27	Amino Acid And Its Derivatives	°±»ùËá¼°ÆäÑÜÉúÎï	"3211-76-5"	1365000	1347000	1382000	1350000	1414000	1388000	1452000	1484000	1443000	1335000	1368000	1476000
Com_279_neg	4-Hydroxyisoleucine	4-ôÇ»ù-L-ÒìÁÁ°±Ëá	C6H13NO3	147.172	1.038	Amino Acid And Its Derivatives	°±»ùËá¼°ÆäÑÜÉúÎï	"781658-23-9"	1556000	746100	1371000	1667000	1264000	1173000	976600	1857000	1902000	1416000	1274000	1215000
Com_280_neg	Ala-Gln	L-±û°±õ£-L-¹È°±õ£°·	C8H15N3O4	217.22	0.85	Amino Acid And Its Derivatives	°±»ùËá¼°ÆäÑÜÉúÎï	"39537-23-0"	735700	627600	323700	1343000	908000	1631000	502900	1102000	706300	1091000	727100	588900
Com_281_neg	O-Aceyl-L-Serine	O-ÒÒõ£»ù-l-Ë¿°±Ëá	C5H9NO4	147.129	1.056	Amino Acid And Its Derivatives	°±»ùËá¼°ÆäÑÜÉúÎï	"5147-00-2"	18170	10600	9843	20010	3872	23270	5803	14350	13770	12090	12060	11850
Com_282_neg	(S)-Leucic acid	ôÇ»ùÒì¼ºËáÒÒõ¥	C6H12O3	132.16	6.404	Organic Acid And Its Derivatives	ÓÐ»úËá¼°ÆäÑÜÉúÎï	"13748-90-8"	54340	45450	54330	74980	62710	111200	64750	49600	79150	50860	58990	65030
Com_283_neg	Lactose	ÈéÌÇ	C12H22O11	342.3	0.911	Carbohydrates And Its Derivatives	ÌÇÀà¼°ÆäÑÜÉúÎï	"63-42-3"	90620	53540	83520	70550	183800	130100	158000	67260	91780	134900	88300	72210
Com_284_neg	3-Hydroxyisovalerate	¦Â-ôÇ»ùÒìÎìËá	C5H10O3	118.13	4.084	Organic Acid And Its Derivatives	ÓÐ»úËá¼°ÆäÑÜÉúÎï	"625-08-1"	67950	70230	85670	81090	105600	85350	87420	100400	92090	114000	135700	169800
Com_285_neg	5-Hydroxymethyluracil	5-ôÇ¼×»ùÄòà×à¤	C5H6N2O3	142.11	1.041	Nucleotide And Its Derivates	ºËÜÕËá¼°ÆäÑÜÉúÎï	"4433-40-3"	17320	11000	21190	18170	21710	19040	12250	23420	17360	9859	24840	24640
Com_286_neg	9-HpOTrE	9-ôÇ»ù¹ýÑõÊ®°ËÌ¼ÈýÏ©Ëá	C18H30O4	310.1	10.92	Fatty Acyls	Ö¬·¾õ£Àà	"111004-08-1"	301800	297700	315800	271600	286900	300500	302900	301700	281400	311200	322500	302900
Com_287_neg	N-Acetylalanine	N-ÒÒõ£-L-±û°±Ëá	C5H9NO3	131.13	2.15	Amino Acid And Its Derivatives	°±»ùËá¼°ÆäÑÜÉúÎï	"97-69-8"	253400	201900	209600	278600	389700	199500	212400	303600	332400	221500	236400	274700
Com_288_neg	Methyl beta-D-galactopyranoside	¼×»ù-¦Â-D-ßÁà«°ëÈéÌÇÜÕ	C7H14O6	194.182	1.03	Carbohydrates And Its Derivatives	ÌÇÀà¼°ÆäÑÜÉúÎï	"1824-94-8"	5438	4515	8820	7142	6600	9290	13690	10600	14280	6267	7433	6718
Com_289_neg	Lysops 22:6	ÈÜÑªÂÑÁ×Ö¬õ£Ë¿°±Ëá22:6	C28H44NO9P	569.62	13.14	Phospholipid	Á×Ö¬		77210	59770	89550	54820	88710	56470	84590	89120	92140	64300	55670	64730
Com_290_neg	Lysope 18:1	ÈÜÑªÂÑÁ×Ö¬õ£ÒÒ´¼°·18:1	C23H46NO7P	479.588	12.81	Phospholipid	Á×Ö¬		479000	238800	603600	561000	658900	435900	506500	652100	510900	498200	464700	499800
Com_291_neg	Hydroxyglutaric acid	2-ôÇ»ù-Îì¶þËá	C5H8O5	148.11	1.45	Organic Acid And Its Derivatives	ÓÐ»úËá¼°ÆäÑÜÉúÎï	"13095-47-1"	145500	212800	185200	330700	175400	143400	119100	282100	208800	125400	137300	198600
Com_292_neg	Hydroxypyruvic acid	3-ôÇ»ù-2-Ñõ´ú±ûËá	C3H4O4	104.061	2.17	Organic Acid And Its Derivatives	ÓÐ»úËá¼°ÆäÑÜÉúÎï	"1113-60-6"	4802000	5516000	3677000	7405000	8460000	980300	6495000	1328000	3218000	3978000	4034000	4644000
Com_293_neg	IDP	¶þÁ×Ëá¼¡¸Ê	C10H13N4O15P3	522.149	1.02	Nucleotide And Its Derivates	ºËÜÕËá¼°ÆäÑÜÉúÎï	"86-04-4"	3792000	1371000	1244000	1710000	1280000	1104000	504700	514800	407800	1357000	1584000	1431000
Com_294_neg	alpha-D-Galactose 1-phosphate	¦Á-D-°ëÈéÌÇ-1-Á×Ëá	C6H13O9P	260.136	0.87	Sugar Acids And Its Derivatives	ÌÇËá¼°ÆäÑÜÉúÎï	"2255-14-3"	141900000	158000000	49910000	169500000	231100000	124800000	194200000	59950000	46520000	129500000	140500000	156200000
Com_295_neg	Gamma-Glu-Leu	¦Ã-¹È°±Ëá-ÁÁ°±Ëá	C11H20N2O5	260.287	5.09	Organic Acid And Its Derivatives	ÓÐ»úËá¼°ÆäÑÜÉúÎï	"2566-39-4"	11690	12660	20850	19000	24300	20230	13580	17870	24930	15350	17870	19210
Com_296_neg	N-Acetyl-D-glucosamine 6-phosphate	6-Á×Ëá-NÒÒõ£-D-°±»ùÆÏÌÑÌÇ	C8H16NO9P	301.188	1.81	Sugar Acids And Its Derivatives	ÌÇËá¼°ÆäÑÜÉúÎï		153200	45860	83770	99940	161100	116900	194000	217600	256900	90380	120200	212400
Com_297_neg	Glycerol-3-phosphate	¸ÊÓÍÁ×Ëáõ¥	C3H9O6P	172.074	0.9	Fatty Acyls	Ö¬·¾õ£Àà	"57-03-4"	2799000	2094000	16510000	60780000	3050000	38410000	1896000	1240000	812500	11530000	12170000	13250000
Com_298_neg	DL-3,4-Dihydroxyphenyl glycol	DL-3,4-¶þôÇ»ù±½»ù¶þ´¼	C8H10O4	170.163	7.37	Benzene and substituted derivatives	±½¼°ÆäÑÜÉúÎï	"28822-73-3"	37740	36220	33660	36600	36460	37980	36710	38110	33360	36110	32410	37350
Com_299_pos	Lysopc 16:1	ÈÜÑªÂÑÁ×Ö¬õ£µ¨¼î16:1	C24H48NO7P	493.61	11.75	Phospholipid	Á×Ö¬		84460	38030	117400	75750	252700	39700	102400	118200	139800	116900	117800	99850
Com_300_pos	Lysopc 16:2 (2N Isomer)	ÈÜÑªÁ×Ö¬õ£µ¨¼î16:2	C24H46NO7P	491.308	11.13	Phospholipid	Á×Ö¬		4992	3932	10460	9995	9443	6773	5236	12050	6668	8393	5620	8665
Com_301_pos	Lysopc 15:0	ÈÜÑªÁ×Ö¬õ£µ¨¼î15:0	C23H48NO7P	481.317	12.93	Phospholipid	Á×Ö¬		626600	398200	376500	449500	1281000	359900	281000	463800	512100	418400	401200	417200
Com_302_pos	Lysopc 16:0	ÈÜÑªÂÑÁ×Ö¬õ£µ¨¼î16:0(2nÒì¹¹)	C24H50NO7P	495.63	12.57	Phospholipid	Á×Ö¬		3884000	2111000	4121000	2665000	7009000	2161000	4517000	4011000	4801000	3322000	3468000	3297000
Com_303_pos	Lysopc 18:2	ÈÜÑªÂÑÁ×Ö¬õ£µ¨¼î18:2	C26H50NO7P	519.65	12.16	Phospholipid	Á×Ö¬		4873000	3476000	3910000	5433000	5498000	3264000	4597000	8962000	5546000	3889000	3959000	4198000
Com_304_pos	Lysopc 18:3	ÈÜÑªÁ×Ö¬õ£µ¨¼î18:3	C26H48NO7P	517.317	12.57	Phospholipid	Á×Ö¬		1407000	825700	1463000	928200	2839000	803100	1658000	1493000	1799000	1264000	1305000	1219000
Com_305_pos	Lysopc 17:0	ÈÜÑªÁ×Ö¬õ£µ¨¼î17:0	C25H52NO7P	509.657	13.17	Phospholipid	Á×Ö¬	"50930-23-9"	34020	21090	30310	23730	45460	16240	21460	37110	40370	26090	24420	25440
Com_306_pos	Lysopc 18:1	ÈÜÑªÂÑÁ×Ö¬õ£µ¨¼î18:1	C26H52NO7P	521.667	12.9	Phospholipid	Á×Ö¬	"3542-29-8"	4747000	2681000	5182000	5657000	5105000	2993000	3055000	6698000	4143000	3224000	3390000	3378000
Com_307_pos	Lysine Butyrate	Àµ°±Ëá¶¡Ëá	C10H22N2O4	234.293	0.9	Amino Acid And Its Derivatives	°±»ùËá¼°ÆäÑÜÉúÎï	"80407-71-2"	3884000	2585000	9627000	3069000	5948000	8404000	3572000	6554000	9126000	3601000	3065000	4480000
Com_308_pos	Lysopc 14:0	ÈÜÑªÂÑÁ×Ö¬õ£µ¨¼î14:0	C22H46NO7P	467.577	11.37	Phospholipid	Á×Ö¬	"20559-16-4"	25450	15390	44680	24450	58930	20010	48540	58860	60480	38760	39780	39140
Com_309_pos	Isovalerylcarnitine	ÒìÎìÈâ¼î	C12H23NO4	245.32	5.66	Carnitine	Èâ¼îÀà	"31023-24-2"	1345000	2880000	1742000	1666000	2801000	2621000	3168000	2376000	1560000	2061000	2132000	2086000
Com_310_pos	3-Hydroxy-butyryl carnitine	3-ôÇ»ù¶¡õ£»ùÈâ¼î	C11H21NO5	247.291	1.91	Carnitine	Èâ¼îÀà	"1469900-92-2"	479300	428300	676300	1326000	2091000	659400	825400	165500	195200	691500	669600	719000
Com_311_pos	Arachidonoylcarnitine	»¨ÉúËÄÏ©ËáÈâ¼î	C27H46NO4	448.668	11.42	Carnitine	Èâ¼îÀà	"36816-11-2"	314600	207400	256900	296600	156700	204100	301100	263700	179100	161100	238300	232700
Com_312_pos	Carnitine-C3	Èâ¶¾¼î-C3	C10H17NO4	217.3	2.56	Carnitine	Èâ¼îÀà		3222000	4023000	4352000	2148000	2858000	4814000	6429000	3999000	2777000	3782000	3454000	3525000
Com_313_pos	Carnitine-C4	Èâ¶¾¼î-C4	C11H21NO4	231.3	4.63	Carnitine	Èâ¼îÀà		18050000	22930000	13790000	25420000	16140000	8980000	18750000	9233000	11730000	15390000	14880000	15000000
Com_314_pos	Cycloleucine	»·ÁÁ°±Ëá	C6H11NO2	129.157	0.84	Amino Acid And Its Derivatives	°±»ùËá¼°ÆäÑÜÉúÎï	"52-52-8"	23830000	19440000	22780000	21490000	22150000	27350000	19470000	30860000	30100000	23660000	24950000	24070000
Com_315_pos	cis-gondoic acid	»¨ÉúÓÍËá	C20H38O2	310.515	16.03	Fatty Acyls	Ö¬·¾õ£Àà	"26764-41-0"	1071000	621500	701000	1409000	532400	583700	311700	579600	545300	414800	437500	286400
Com_316_pos	Pantethine	D-·ºÁòÒÒ°·	C22H42N4O8S2	554.721	0.85	Amino Acid And Its Derivatives	°±»ùËá¼°ÆäÑÜÉúÎï	"16816-67-4"	8234	6304	8084	7817	12670	10030	4803	11724	11808	8532	13890	4888
Com_317_pos	D-Myo-inositol 4,5-bisphosohate	D-ÏËÎ¬´¼-4,5-¶þÁ×Ëá	C6H14O12P2	340.116	0.97	Alcohols and polyols	´¼Àà¼°Æä¶àÔª´¼	"47055-78-7"	157300	142900	155300	124500	187100	93060	151100	115200	105600	143400	118600	106700
Com_318_pos	Glu-Glu	¹È°±õ£-¹È°±Ëá	C10H16N2O7	276.243	1.0	Amino Acid And Its Derivatives	°±»ùËá¼°ÆäÑÜÉúÎï	"3929-61-1"	595700	949200	198700	335900	341100	131300	204300	69430	93330	388100	405300	429600
Com_319_pos	Ectoine	ÒÀ¿Ë¶àÒò	C6H10N2O2	142.156	0.95	Others	ÆäËü	"96702-03-3"	2340000	1726000	1161000	909700	625000	724500	525400	483600	479400	856100	808700	943800
Com_320_pos	Cadaverine	1,5-¶þ°±»ùÎìÍé	C5H14N2	102.18	0.706	Polyamine	¶à°·	"462-94-2"	7834	10290	16300	7677	7330	5331	12420	16670	6926	13150	9348	12420
Com_321_pos	N-Acetylneuraminic acid	N-ÒÒõ£Éñ¾­°±Ëá	C11H19NO9	309.27	0.988	Amino Acid And Its Derivatives	°±»ùËá¼°ÆäÑÜÉúÎï	"131-48-6"	99290	48240	147100	92500	75090	52500	118400	50830	53100	111300	88960	78290
Com_322_pos	Palmitoylethanolamide	×ØéµÒÒ´¼°·	C18H37NO2	299.49	14.399	Organic Acid And Its Derivatives	ÓÐ»úËá¼°ÆäÑÜÉúÎï	"544-31-0"	25620	27420	33580	24410	39190	32840	28850	37540	32390	29510	31570	28550
Com_323_pos	Dehydrocholic acid	¶ìÈ¥Çâµ¨Ëá	C24H34O5	402.52	12.273	Bile Acids	µ¨Ö­Ëá	"81-23-2"	6055	8430	9548	12790	8999	12170	10920	9693	6498	12510	13250	9451
Com_324_pos	Uracil	Äòà×à¤	C4H4N2O2	112.09	1.47	Nucleotide And Its Derivates	ºËÜÕËá¼°ÆäÑÜÉúÎï	"66-22-8"	110478	138000	159900	117300	141000	108547	130945	120300	229500	91800	121200	112700
Com_325_pos	Estradiol Benzoate	±½¼×Ëá´Æ¶þ´¼	C25H28O3	376.49	14.023	Hormones	¼¤ËØ	"50-50-0"	1831	9236	3348	3711	10704	2531	9351	2866	1792	3985	2503	2719
Com_326_pos	L-Tryptophan	L-É«°±Ëá	C11H12N2O2	204.23	4.894	Amino Acid And Its Derivatives	°±»ùËá¼°ÆäÑÜÉúÎï	"73-22-3"	38400000	23990000	26720000	40080000	43860000	31420000	44700000	32490000	40090000	34080000	34020000	33860000
Com_327_pos	Erucamide	½æËáõ£°·	C22H43NO	337.6	16.97	Fatty Acyls	Ö¬·¾õ£Àà	"112-84-5"	47490000	54970000	48520000	45570000	46870000	47120000	48040000	48980000	44610000	48950000	46820000	56110000
Com_328_pos	Hexadecanamide	Ê®ÁùÌ¼õ£°·	C16H33NO	255.44	14.82	Fatty Acyls	Ö¬·¾õ£Àà	"629-54-9"	31770000	22740000	25360000	40220000	18470000	20420000	12020000	18830000	18050000	16090000	15690000	15760000
Com_329_pos	N-Lauryldiethanolamine	Ê®¶þÍé»ùÒÒ´¼°·	C16H35NO2	273.45	9.45	Amines	°·Àà	"1541-67-9"	27570	22450	23230	27060	24760	26000	27120	26980	25190	27480	23250	26470
Com_330_pos	2-Aminoethylphosphonate	2-°±»ùÒÒ»ùÁ×Ëáõ¥	C2H8NO3P	125.06	0.98	Organic Acid And Its Derivatives	ÓÐ»úËá¼°ÆäÑÜÉúÎï	"2041-14-7"	1160000	975800	1173000	1024000	968900	937700	993600	718100	874500	1015000	946100	901300
Com_331_pos	6-Methylmercaptopurine	6-¼×»ùÛÏàÑßÊ	C6H6N4S	166.21	4.04	Purines and purine derivatives	àÑßÊ¼°ÆäÑÜÉúÎï	"50-66-8"	10130000	5339000	5783000	7900000	9365000	7431000	8590000	5758000	9444000	7360000	7240000	7170000
Com_332_pos	2-Hydroxycinnamate	2-ôÇ»ùÈâ¹ðËá	C9H8O3	164.16	1.81	Cinnamic acids and derivatives	Èâ¹ðËá¼°ÆäÑÜÉúÎï	"614-60-8"	3057000	1538000	1739000	2855000	3509000	2192000	2618000	2964000	3231000	2539000	2300000	2450000
Com_333_pos	Piperidine	ßßà¤	C5H11N	85.15	2.04	Organoheterocyclic compounds	ÓÐ»úÔÓ»·»¯ºÏÎï	"110-89-4"	511700	210900	281600	465800	592400	349300	446200	193100	573400	383400	400200	339700
Com_334_pos	Isoquinoline	Òìà­ßø	C9H7N	129.16	4.9	Organoheterocyclic compounds	ÓÐ»úÔÓ»·»¯ºÏÎï	"119-65-3"	21860	18110	18790	31230	33530	24430	31070	22370	23700	26490	26850	24770
Com_335_pos	Purine	àÑßÊ	C5H4N4	120.112	4.1	Nucleotide And Its Derivates	ºËÜÕËá¼°ÆäÑÜÉúÎï	"120-73-0"	56350	32090	32990	41040	53730	42670	42370	35150	49680	40410	40290	37690
Com_336_pos	S-Methyl-5'-thioadenosine	S-¼×»ù-5'-ÁòÏÙàÑßÊ	C11H15N5O3S	297.333	4.94	Nucleotide And Its Derivates	ºËÜÕËá¼°ÆäÑÜÉúÎï		820200	903600	723000	898700	1088000	743800	856400	726500	823900	1165000	1141000	1193000
Com_337_pos	Isobutyrylglycine	2-(Òì¶¡»ù°±»ù)ÒÒËá	C6H11NO3	145.156	0.63	Organic Acid And Its Derivatives	ÓÐ»úËá¼°ÆäÑÜÉúÎï	"15926-18-8"	13850000	11190000	19390000	9476000	11510000	11250000	12300000	13590000	12800000	12760000	12320000	10500000
Com_338_pos	(5-L-Glutamyl)-L-Amino Acid	5-L-¹È°±õ£-L-±û°±Ëá	C8H14N2O5	218.207	1.18	Amino Acid And Its Derivatives	°±»ùËá¼°ÆäÑÜÉúÎï	"5875-41-2"	353900	672600	90360	1135000	569900	956100	453300	679400	585000	677800	654900	613300
Com_339_pos	Fexofenadine	·ÇË÷·ÇÄÇ¶¨	C32H39NO4	501.656	12.04	Others	ÆäËü	"83799-24-0"	762500	483700	526800	706600	809600	490200	679500	1246000	809600	559900	494000	485500
Com_340_pos	Feruloylcholine	°¢Îºõ£µ¨¼î	C15H22NO4	280.34	14.42	Cholines	µ¨¼îÀà		908500	703000	713900	1016000	734100	708100	581400	703900	781500	652600	666400	624700
Com_341_pos	Gly-Phe	¸Ê°±õ£-±½±û°±Ëá	C11H14N2O3	222.24	4.88	Amino Acid And Its Derivatives	°±»ùËá¼°ÆäÑÜÉúÎï	"3321-03-7"	165100	142300	159200	163400	232900	147000	297200	179400	474600	210300	208500	218100
Com_342_pos	Glycerol 1-hexadecanoate	µ¥×ØéµËá¸ÊÓÍõ¥	C19H38O4	330.503	13.72	Glycerolipids	¸ÊÓÍÖ¬Àà	"542-44-9"	36780	59720	40000	24860	19700	33050	29210	35370	23430	81120	53460	75950
Com_343_pos	gamma-Muurolene	¦Ã-Ä¾ÂÞÏ©	C15H24	204.351	4.87	Fatty Acyls	Ö¬·¾õ£Àà	"24268-39-1"	217100	122400	145400	222900	234100	183800	244700	187700	222100	194300	191600	186200
Com_344_pos	Galactinol	¼¡´¼°ëÈéÌÇÜÕ	C12H22O11	342.297	0.95	Carbohydrates And Its Derivatives	ÌÇÀà¼°ÆäÑÜÉúÎï	"3687-64-7"	116000	36690	46150	83630	21500	64470	76420	92160	60720	83420	90210	73430
Com_345_pos	Flavin Adenine Dinucleotide	»ÆËØÏÙàÑßÊ¶þºËÜÕËá	C27H33N9O15P2	785.55	5.14	Nucleotide And Its Derivates	ºËÜÕËá¼°ÆäÑÜÉúÎï	"146-14-5"	18310	17900	21500	24290	21950	15340	23050	17990	18140	14530	21650	12750
Com_346_pos	3-Hydroxy-3-Methylpentane-1,5-Dioic Acid	3-ôÇ»ù-3-¼×»ù¹È°±Ëá	C6H10O5	162.14	0.87	Fatty Acyls	Ö¬·¾õ£Àà	"503-49-1"	3576000	4405000	3175000	2446000	2690000	4046000	3151000	3512000	2554000	3433000	3204000	3285000
Com_347_pos	Oxidized glutathione	Ñõ»¯¹Èë×¸ÊëÄ	C20H32N6O12S2	612.6	1.78	Amino Acid And Its Derivatives	°±»ùËá¼°ÆäÑÜÉúÎï	"121-24-4"	189900	247000	267800	442500	763900	109100	183400	303400	216000	327700	294900	315800
Com_348_pos	7,8-Dihydrofolate	7,8-¶þÇâÒ¶Ëá	C19H21N7O6	443.41	0.8	Organic Acid And Its Derivatives	ÓÐ»úËá¼°ÆäÑÜÉúÎï	"4033-27-6"	4882	9377	19100	14430	16950	17470	20430	12700	23060	17300	15280	14050
Com_349_pos	6-Deoxy-D-glucose	6-ÍÑÑõ-D-ÆÏÌÑÌÇ	C6H12O5	164.156	1.825	Carbohydrates And Its Derivatives	ÌÇÀà¼°ÆäÑÜÉúÎï	"7658-08-4"	652600	286700	341400	535900	676500	401500	541000	518300	587600	532900	520500	458000
Com_350_pos	5-Aminopentanoate	5-°±»ùÎìËá	C5H11NO2	117.146	0.96	Organic Acid And Its Derivatives	ÓÐ»úËá¼°ÆäÑÜÉúÎï	"660-88-8"	353600	288600	209200	193200	144100	297700	94610	243400	178200	184600	162600	200600
Com_351_pos	5-Hydroxylysine	5-ôÇ»ùÀµ°±Ëá	C6H15ClN2O3	198.65	0.72	Amino Acid And Its Derivatives	°±»ùËá¼°ÆäÑÜÉúÎï	"13204-98-3"	80500	79960	121100	97990	89920	103700	95480	109300	129700	112100	100800	89890
Com_352_pos	5-Methoxyindole-3-acetic acid	5-¼×Ñõ»ùßÅßá-3-ÒÒËá	C11H11NO3	205.21	4.87	Indole And Its Derivatives	ßÅßá¼°ÆäÑÜÉúÎï	"3471-31-6"	430000	273100	291000	439500	449700	360300	495400	338000	435800	364500	375900	384600
Com_353_pos	Pyridoxamine	ßÁ¶ß°·	C8H12N2O2	168.193	1.0	Pyridine And Its Derivatives	ßÁà¤¼°ÆäÑÜÉúÎï	"85-87-0"	113400	67420	119700	61920	84740	83380	63070	105500	89360	90650	82140	103200
Com_354_pos	5beta-Androstan-17beta-ol-3-one	5¦Â-ÐÛçÞÍé-17¦Â-´¼-3-Íª	C19H30O2	290.44	0.84	Hormones	¼¤ËØ	"571-22-2"	948700	1050000	942400	815100	949600	874200	902800	781100	722600	764800	809700	734600
Com_355_pos	Etiocholanolone	3a-ôÇ»ù-5b-ÐÛçÞÍé-17-Íª	C19H30O2	290.44	0.68	Hormones	¼¤ËØ	"53-42-9"	324900	404200	389700	312200	347000	336700	310600	324300	275900	281500	285900	326100
Com_356_pos	5beta-Androstan-3beta-ol-17-one	5¦Â-ÐÛçÞÍé-3¦Â-ôÇ»ù-17Íª	C19H30O2	290.44	0.68	Hormones	¼¤ËØ	"571-31-3"	228400	311700	341900	278100	274900	280000	281300	280800	207000	218000	249500	267700
Com_357_pos	Sarcosine	¼¡°±Ëá	C3H7NO2	89.093	0.9	Amino Acid And Its Derivatives	°±»ùËá¼°ÆäÑÜÉúÎï	"107-97-1"	17920000	13950000	17330000	21630000	17520000	18320000	17510000	17280000	19780000	20410000	18780000	17740000
Com_358_pos	S-Adenosyl-methionine	S-ÏÙÜÕ-¼×Áò°±Ëá	C22H30N6O8S2	570.639	0.84	Amino Acid And Its Derivatives	°±»ùËá¼°ÆäÑÜÉúÎï	"17176-17-9"	4340000	5925000	4062000	5630000	5768000	4332000	4266000	4233000	5001000	4209000	3956000	4711000
Com_359_pos	Vitamin B2	ºË»ÆËØB2	C17H20N4O6	376.364	5.94	Vitamins	Î¬ÉúËØ	"83-88-5"	43540	42190	46500	42040	51500	44500	51520	49980	48520	53090	54670	53820
Com_360_pos	R-Aminobutyrate	R-3-°±»ù¶¡Ëá	C4H9NO2	103.12	0.91	Organic Acid And Its Derivatives	ÓÐ»úËá¼°ÆäÑÜÉúÎï	"3775-73-3"	90500	43280	65000	93490	57090	52280	65740	89590	90590	65060	73450	59760
Com_361_pos	S-ribosyl-L-homocysteine	S-ºËÌÇ»ù-L-Í¬ÐÍ°ëë×°±Ëá	C9H17NO6S	267.3	3.14	Amino Acid And Its Derivatives	°±»ùËá¼°ÆäÑÜÉúÎï		282800	307900	265200	281300	307600	276900	334900	253800	256100	237300	262400	296000
Com_362_pos	Spermidine	ÑÇ¾«°·	C7H19N3	145.246	0.68	Polyamine	¶à°·	"124-20-9"	4179000	3478000	5782000	2684000	3664000	3780000	3686000	4301000	3818000	3782000	3614000	3492000
Com_363_pos	5-Aminolevulinate	5-°±»ùÒÒõ£±ûËá	C5H9NO3	131.13	2.07	Organic Acid And Its Derivatives	ÓÐ»úËá¼°ÆäÑÜÉúÎï	"106-60-5"	300300	141500	165300	236100	342700	222100	240400	121800	342800	237800	225300	201800
Com_364_pos	5-Aminosalicylate	5-°±»ùË®ÑîËá	C7H7NO3	153.135	1.68	Organic Acid And Its Derivatives	ÓÐ»úËá¼°ÆäÑÜÉúÎï	"89-57-6"	334500	346000	385400	424000	608100	676500	402400	628800	767300	493600	612600	619500
Com_365_pos	N-(5-Aminopentyl)acetamide	N-(5-°±»ùÎì»ù)ÒÒõ£°·	C7H16N2O	144.21	1.01	Polyamine	¶à°·	"32343-73-0"	38890	45200	20610	31910	24370	33810	39530	23730	16370	32700	29900	30350
Com_366_pos	H-Trp-NH2.HCl	L-É«°±õ£°·ÑÎËáÑÎ	C11H14ClN3O	239.7	4.587	Amino Acid And Its Derivatives	°±»ùËá¼°ÆäÑÜÉúÎï	"5022-65-1"	32400	36720	12470	53230	67900	111300	23750	36870	69040	50440	51080	46070
Com_367_pos	Methylguanidine HCl	1-¼×»ùëÒÑÎËáÑÎ	C2H8ClN3	109.56	0.88	Organic Acid And Its Derivatives	ÓÐ»úËá¼°ÆäÑÜÉúÎï	"21770-81-0"	128000	65830	84250	129400	167600	160700	95170	52530	127400	147000	96470	108400
Com_368_pos	beta-Alanine methyl ester	3-°±»ù±ûËá¼×õ¥	C4H9NO2	103.12	0.98	Amino Acid And Its Derivatives	°±»ùËá¼°ÆäÑÜÉúÎï	"4138-35-6"	417900	279200	375900	533300	368600	284100	394300	554100	522900	504300	454900	442300
Com_369_pos	Dihydrouracil	¶þÇâÄòà×à¤	C4H6N2O2	114.103	6.15	Pyrimidines and pyrimidine derivatives	à×à¤¼°ÆäÑÜÉúÎï	"504-07-4"	18000	8550	32350	15680	22170	28320	21180	13270	44730	231400	298900	210300
Com_370_pos	Imidazoleacetic acid	ßäßòÒÒËá	C5H6N2O2	126.113	0.91	Organic Acid And Its Derivatives	ÓÐ»úËá¼°ÆäÑÜÉúÎï	"645-65-8"	2409000	3932000	975300	2506000	4307000	2034000	3522000	804500	637100	2251000	1992000	2131000
Com_371_pos	1D-chiro-Inositol	D-ÊÖÐÔ¼¡´¼	C6H12O6	180.156	18.32	Phenols And Its Derivatives	·ÓÀà¼°ÆäÑÜÉúÎï	"643-12-9"	1122000	1016000	1044000	1356000	1391000	1478000	1452000	1474000	1532000	1230000	1296000	1484000
Com_372_pos	Isoproterenol	Òì±ûÉöÉÏÏÙËØ	C11H17NO3	211.258	8.36	Hormones	¼¤ËØ	"7683-59-2"	180100	189500	165000	156000	163000	167500	186000	181300	141800	177100	163100	161700
Com_373_pos	L-(-)-alpha-Amino-epsilon-Caprolactam	3-°±»ùÁùÇâ-2H-µªÔÓ×¿-2-Íª	C6H12N2O	128.172	0.7	Amino Acid And Its Derivatives	°±»ùËá¼°ÆäÑÜÉúÎï	"21568-87-6"	346900	610900	625200	1453000	542600	1018000	643800	488300	681700	674900	669800	675400
Com_374_pos	L-Alanyl-L-leucine	L-±û°±õ£-L-ÁÁ°±Ëá	C9H18N2O3	202.251	4.45	Amino Acid And Its Derivatives	°±»ùËá¼°ÆäÑÜÉúÎï	"3303-34-2"	119700	141900	125300	137600	312300	165200	580200	251700	643000	277400	265500	254300
Com_375_pos	Ip7G	ÒìÎìÏ©»ù-7-ÆÏÌÇÜÕ	C16H23N5O5	365.384	0.96	Nucleotide And Its Derivates	ºËÜÕËá¼°ÆäÑÜÉúÎï	"59384-58-6"	17660	22640	11110	23320	11790	15260	18200	27230	14290	13390	14750	19990
Com_376_pos	Isobutyryl carnitine	Òì¶¡õ£Èâ¼î	C11H21NO4	231.289	4.62	Carnitine	Èâ¼îÀà	"25518-49-4"	15260000	19920000	11870000	21540000	13820000	7665000	14980000	8072000	9626000	13080000	13600000	12770000
Com_377_pos	beta amino butyric acid	¦Â-°±»ù¶¡Ëá	C4H9NO2	103.12	0.98	Amino Acid And Its Derivatives	°±»ùËá¼°ÆäÑÜÉúÎï	"541-48-0"	395500	568600	183800	674500	410700	792000	476200	616600	748200	408400	479500	552600
Com_378_pos	Adenine	ÏÙàÑßÊ	C5H5N5	135.127	1.032	Nucleotide And Its Derivates	ºËÜÕËá¼°ÆäÑÜÉúÎï	"73-24-5"	2933000	3256000	2199000	4274000	2001000	2097000	698500	572900	478400	1414000	1422000	1959000
Com_379_pos	4-Pregnen-17alpha,20alpha-Diol-3-One	4-ÔÐÍé-17¦Á,20¦Á-¶þ´¼-3-Íª	C21H32O3	332.477	0.87	Hormones	¼¤ËØ	"652-69-7"	205000	223000	160600	153700	181400	180900	220500	166100	139700	186200	169500	166000
Com_380_pos	11-Ketoetiocholanolone	11-Íª±¾µ¨Íé´¼Íª	C19H28O3	304.424	15.04	Hormones	¼¤ËØ	"739-27-5"	104500	58280	98020	131600	124800	89280	103600	97960	100200	157100	153400	143200
Com_381_pos	H-Gly-Pro-OH	¸Ê°±õ£-L-¸¬°±Ëá	C7H12N2O3	172.18	1.035	Amino Acid And Its Derivatives	°±»ùËá¼°ÆäÑÜÉúÎï	"704-15-4"	147900	143900	155400	164700	170800	122700	228000	136700	328600	175500	166200	185600
Com_382_pos	L-Homocitrulline	L-¸ß¹Ï°±Ëá	C7H15N3O3	189.21	0.972	Amino Acid And Its Derivatives	°±»ùËá¼°ÆäÑÜÉúÎï	"1190-49-4"	232300	178600	252100	156400	201800	203200	176800	184500	179300	180000	152600	188500
Com_383_pos	Glycyl-L-leucine	N-¸Ê°±õ£-L-ÁÁ°±Ëá	C8H16N2O3	188.22	4.466	Amino Acid And Its Derivatives	°±»ùËá¼°ÆäÑÜÉúÎï	"869-19-2"	251200	166500	199600	240300	357200	227000	394900	301900	693400	306900	284600	310400
Com_384_pos	5-Methylcytosine	5-¼×»ù°ûà×à¤	C5H7N3O	125.13	0.991	Nucleotide And Its Derivates	ºËÜÕËá¼°ÆäÑÜÉúÎï	"554-01-8"	661200	619100	671100	556100	575400	529100	539200	424900	545700	554700	563900	568900
Com_385_pos	D-Proline	D-¸¬°±Ëá	C5H9NO2	115.13	0.967	Amino Acid And Its Derivatives	°±»ùËá¼°ÆäÑÜÉúÎï	"344-25-2"	55690000	30350000	39210000	61530000	65110000	55780000	61310000	73130000	60960000	53560000	52160000	52130000
Com_386_pos	L-Hydroxyproline	L-ôÇ¸¬°±Ëá	C5H9NO3	131.13	0.88	Amino Acid And Its Derivatives	°±»ùËá¼°ÆäÑÜÉúÎï	"51-35-4"	36190000	37960000	31820000	35470000	33360000	36690000	37260000	37050000	34490000	36500000	36000000	34300000
Com_387_pos	Glycyl-L-valine	¸Ê°±õ£-L-çÓ°±Ëá	C7H14N2O3	174.2	2.077	Amino Acid And Its Derivatives	°±»ùËá¼°ÆäÑÜÉúÎï	"1963-21-9"	124600	154800	78720	122700	206700	75400	286200	132000	392100	225900	182000	165600
Com_388_pos	N6-Acetyl-L-lysine	N6-ÒÒõ£-L-Àµ°±Ëá	C8H16N2O3	188.22	1.304	Amino Acid And Its Derivatives	°±»ùËá¼°ÆäÑÜÉúÎï	"692-04-6"	779000	559500	1286000	710300	996200	1000000	1227000	579000	767600	613000	688200	750400
Com_389_pos	N,N-Dimethylglycine	N,N-¶þ¼×»ù¸Ê°±Ëá	C4H9NO2	103.12	0.9	Amino Acid And Its Derivatives	°±»ùËá¼°ÆäÑÜÉúÎï	"1118-68-9"	1825000	1405000	1973000	1546000	2108000	2151000	1863000	1868000	1543000	1851000	1769000	1850000
Com_390_pos	Guanosine monophosphate	ÄñÜÕµ¥Á×Ëá	C10H14N5O8P	363.058	1.01	Nucleotide And Its Derivates	ºËÜÕËá¼°ÆäÑÜÉúÎï		1552000	6264000	7514000	980500	11720000	3617000	14310000	13960000	21480000	9470000	8462000	8871000
Com_391_pos	Diethylglutarate	Îì¶þËá¶þÒÒõ¥	C9H16O4	188.105	0.67	Organic Acid And Its Derivatives	ÓÐ»úËá¼°ÆäÑÜÉúÎï	"818-38-2"	13780000	15370000	14130000	11380000	17060000	15330000	18220000	14190000	12580000	12420000	13840000	14730000
Com_392_pos	5-Hydroxyindoleacetate	5-ôÇ»ùßÅßá-3-ÒÒËá	C10H9NO3	191.058	5.58	Indole And Its Derivatives	ßÅßá¼°ÆäÑÜÉúÎï	"54-16-0"	34470	35030	43810	36240	28970	29250	49300	44750	71710	47920	34470	32850
Com_393_pos	D-Phenylalanine	D-±½±û°±Ëá	C9H11NO2	165.19	4.106	Amino Acid And Its Derivatives	°±»ùËá¼°ÆäÑÜÉúÎï	"673-06-3"	247900000	135000000	144300000	192800000	224200000	182500000	210400000	141900000	228200000	181400000	177700000	176300000
Com_394_pos	Uridine	ÄòÜÕ	C9H12N2O6	244.2	1.86	Nucleotide And Its Derivates	ºËÜÕËá¼°ÆäÑÜÉúÎï	"58-96-8"	484900	362000	785000	607600	460800	480500	497500	500100	512500	476500	535500	489700
Com_395_pos	Adenosine	ÏÙÜÕ	C10H13N5O4	267.24	2.762	Nucleotide And Its Derivates	ºËÜÕËá¼°ÆäÑÜÉúÎï	"58-61-7"	1180000	8270000	4542000	373900	8883000	5052000	2810000	3359000	337400	3733000	3652000	3591000
Com_396_pos	Cytidine	°ûÜÕ	C9H13N3O5	243.22	1.029	Nucleotide And Its Derivates	ºËÜÕËá¼°ÆäÑÜÉúÎï	"65-46-3"	413700	479800	364800	636500	495600	429500	423800	653800	687600	588000	636900	528700
Com_397_pos	SDMA	¶þ¼×»ù-L-¾«°±Ëá	C8H18N4O2	202.25	0.913	Amino Acid And Its Derivatives	°±»ùËá¼°ÆäÑÜÉúÎï	"30344-00-4"	245600	255900	188000	405100	281000	293200	310300	493700	451200	429100	342200	308700
Com_398_pos	Glutathione	¹Èë×¸ÊëÄ	C10H17N3O6S	307.32	1.51	Amino Acid And Its Derivatives	°±»ùËá¼°ÆäÑÜÉúÎï	"70-18-8"	45910000	47620000	60270000	58470000	68240000	47370000	57640000	74310000	65730000	51410000	55660000	57690000
Com_399_pos	16alpha-Hydroxytestosterone	16¦Á-ôÇØºçÞÍª	C19H28O3	304.424	15.01	Hormones	¼¤ËØ	"63-01-4"	53020	47700	69630	50340	80140	64810	70050	75320	54780	49590	57730	51640
Com_400_pos	11beta-Hydroxytestosterone	11¦Â-ôÇØºÍª	C19H28O3	304.424	0.68	Hormones	¼¤ËØ	"1816-85-9"	885600	1099000	1121000	1002000	957100	1037000	899700	836400	874300	767900	883500	1099000
Com_401_pos	10E,12Z-Octadecadienoic acid	10E,12Z-Ê®°ËÌ¼¶þÏ©Ëá	C18H32O2	280.445	14.42	Fatty Acyls	Ö¬·¾õ£Àà	"2420-56-6"	3317000	2600000	2683000	3591000	2579000	2377000	1999000	2754000	2594000	2291000	2245000	2152000
Com_402_pos	1,4-Dihydro-1-Methyl-4-Oxo-3-Pyridinecarboxamide	1,4-¶þÇâ-1-¼×»ù-4-Ñõ´ú-3-ßÁà¤¼×õ£°·	C7H8N2O2	152.151	1.69	Pyridine And Its Derivatives	ßÁà¤¼°ÆäÑÜÉúÎï	"769-49-3"	1501000	756900	1764000	944000	1451000	945500	1209000	920800	2112000	1122000	1037000	1359000
Com_403_pos	Nandrolone	19-È¥¼×ØºÍª	C18H26O2	274.398	9.45	Hormones	¼¤ËØ	"434-22-0"	703700	515100	549700	522200	645800	841200	503400	686700	445400	606600	627400	607400
Com_404_pos	1-(4-Methoxyphenyl)-2-propanone	1-(4-¼×Ñõ»ù±½»ù)-2-±ûÍª	C10H12O2	164.201	1.81	Benzene and substituted derivatives	±½¼°ÆäÑÜÉúÎï	"122-84-9"	1033000	739900	649700	919600	1318000	811000	895400	1090000	1129000	910400	825600	894200
Com_405_pos	Lysopc 20:4	ÈÜÑªÁ×Ö¬õ£µ¨¼î20:4	C28H50NO7P	543.681	12.9	Phospholipid	Á×Ö¬		1721000	1061000	1698000	1826000	1898000	1147000	1052000	2472000	1595000	1254000	1294000	1220000
Com_406_pos	cAMP	»·ÏÙÜÕËá	C10H12N5O6P	329.206	1.74	Nucleotide And Its Derivates	ºËÜÕËá¼°ÆäÑÜÉúÎï	"60-92-4"	164600	171300	177000	150600	237200	163000	141200	151400	96810	168600	133300	113800
Com_407_pos	N-Acetyl-aspartic acid	N-ÒÒõ£-Ìì¶¬°±Ëá	C6H9NO5	175.139	1.37	Amino Acid And Its Derivatives	°±»ùËá¼°ÆäÑÜÉúÎï		209400	295900	366500	399100	282600	345900	215200	331800	239400	247500	293300	280400
Com_408_pos	Benzamidine Hydrochloride Hydrate	±½¼×ëß	C7H11ClN2O	174.628	4.09	Benzene and substituted derivatives	±½¼°ÆäÑÜÉúÎï	"206752-36-5"	825000	408200	425600	627300	727200	556600	643600	443200	701400	597100	576100	544800
Com_409_pos	Mag (18:1)	µ¥õ£¸ÊÓÍõ¥(õ£»ù18:1)	C21H40O4	356.2	15.23	Glycerolipids	¸ÊÓÍÖ¬Àà		19620	18190	18370	12590	44440	25210	26060	27690	30580	24410	18700	13030
Com_410_pos	L-beta-Imidazolelactic acid	L-¦Â-ßäßòÈéËá	C6H8N2O3	156.139	0.83	Carbohydrates And Its Derivatives	ÌÇÀà¼°ÆäÑÜÉúÎï	"14403-45-3"	1541000	1153000	1140000	1357000	1614000	1207000	972300	1462000	1148000	1343000	1339000	1278000
Com_411_pos	L-Octanoylcarnitine	ÐÁõ£Èâ¼î	C15H29NO4	287.395	7.95	Carnitine	Èâ¼îÀà	"25243-95-2"	666400	851000	406000	581000	602700	470900	712700	415700	233900	518400	504600	511100
Com_412_pos	Hexanoylcarnitine	¼ºõ£Èâ¼î	C13H25NO4	259.34	6.6	Carnitine	Èâ¼îÀà	"22671-29-0"	2914000	4564000	2191000	4549000	3932000	2046000	3872000	1981000	2160000	2929000	2906000	2853000
Com_413_pos	D-Ala-D-Ala	D-±û°±õ£-D-±û°±Ëá	C6H12N2O3	160.171	0.95	Amino Acid And Its Derivatives	°±»ùËá¼°ÆäÑÜÉúÎï	"923-16-0"	2763000	4844000	994000	10420000	5822000	11240000	4658000	7653000	7172000	6460000	6322000	5851000
Com_414_pos	D-Galactosamine	2-°±»ù-2-ÍÑÑõ-D-°ëÈéÌÇ	C6H14ClNO5	215.632	0.71	Carbohydrates And Its Derivatives	ÌÇÀà¼°ÆäÑÜÉúÎï	"1772-03-8"	319100	336600	361300	259200	323400	292700	293600	267500	286900	293700	290700	257300
Com_415_pos	8-Bromoguanosine	8-äåÄñÜÕ	C10H12BrN5O5	362.137	0.98	Nucleotide And Its Derivates	ºËÜÕËá¼°ÆäÑÜÉúÎï	"4016-63-1"	27110	22680	16540	16550	24010	29480	28560	15070	33330	17620	14860	30740
Com_416_pos	Carnosine	¼¡ëÄ	C9H14N4O3	226.232	0.76	Organic Acid And Its Derivatives	ÓÐ»úËá¼°ÆäÑÜÉúÎï	"305-84-0"	176900000	135700000	118500000	143400000	197700000	141800000	112600000	168800000	127200000	153900000	150200000	140100000
Com_417_pos	N-Acetyl-L-glutamic acid	N-ÒÒõ£-L-¹È°±õ£°·	C7H11NO5	189.166	0.71	Amino Acid And Its Derivatives	°±»ùËá¼°ÆäÑÜÉúÎï	"1188-37-0"	7778000	8411000	8618000	8190000	8931000	8872000	9281000	7663000	7567000	7686000	7924000	7934000
Com_418_pos	N4-Acetylcytidine	N-ÒÒõ£°ûà×à¤	C11H15N3O6	285.253	4.38	Nucleotide And Its Derivates	ºËÜÕËá¼°ÆäÑÜÉúÎï	"3768-18-1"	12970	16300	15400	6776	14060	12400	8266	11270	11900	7979	13780	10230
Com_419_pos	Metanephrine	¼ä¼×ÉöÉÏÏÙËØ	C10H15NO3	197.231	15.12	Phenols And Its Derivatives	·ÓÀà¼°ÆäÑÜÉúÎï	"5001-33-2"	1199000	703900	955200	1140000	823300	753500	565300	761100	1211000	737700	716800	745300
Com_420_pos	Ethambutol	ÒÒ°·¶¡´¼	C10H24N2O2	204.31	0.81	Amines	°·Àà	"74-55-5"	53000	77940	41990	29300	65020	49320	25660	29490	34230	31710	36060	26320
Com_421_pos	Melamine	Èý¾ÛÇè°·	C3H6N6	126.12	0.9	Others	ÆäËü	"108-78-1"	56490	66000	33510	51150	56210	37470	81350	45952	57619	38970	43360	32450
Com_422_pos	Tubercidin	É±½áºË¾úËØ	C11H14N4O4	266.25	2.153	Others	ÆäËü	"69-33-0"	16680	13270	25120	19740	13630	12550	18220	26080	18420	11720	15230	11690
Com_423_pos	1,4-Naphthoquinone	1,4-ÝÁõ«	C10H6O2	158.153	1.082	Others	ÆäËü	"130-15-4"	1483000	1374000	1448000	1055000	1449000	1366000	1628000	1497000	1308000	1443000	1465000	1471000
Com_424_pos	S-Lactoyglutathione	S-Èéõ£¹Èë×¸ÊëÄ	C13H21N3O8S	379.386	2.65	Amino Acid And Its Derivatives	°±»ùËá¼°ÆäÑÜÉúÎï	"25138-66-3"	177600	326700	101900	393700	61470	38030	37480	16800	6271	272000	282100	304300
Com_425_pos	All-cis-4,7,10,13,16-docosapentaenoic acid	¶þÊ®¶þÌ¼ÎåÏ©Ëá	C22H34O2	330.504	13.78	Fatty Acyls	Ö¬·¾õ£Àà	"25182-74-5"	32430	46580	48570	32590	51410	13700	33970	34030	29300	60970	57760	61220
Com_426_pos	1,4-Diaminobutane	¸¯°·	C4H12N2	88.15	0.699	Polyamine	¶à°·	"110-60-1"	245500	248700	390900	440900	150900	119900	270300	452000	382500	512900	305600	512600
Com_427_pos	1,3-Dimethyluracil	1,3-¶þ¼×»ùëåà×à¤	C6H8N2O2	140.14	4.463	Organoheterocyclic compounds	ÓÐ»úÔÓ»·»¯ºÏÎï	"874-14-6"	14490	22660	21200	20670	18730	14130	7363	34790	13900	20860	24480	26060
Com_428_pos	3-Ureidopropionate	3-õ£ëå±ûËá	C4H8N2O3	132.12	1.07	Organic Acid And Its Derivatives	ÓÐ»úËá¼°ÆäÑÜÉúÎï	"462-88-4"	1468000	1543000	1384000	1378000	1446000	1365000	1335000	1305000	1293000	1428000	1473000	1301000
Com_429_pos	5-Methyluridine	5-¼×»ùÄòÜÕ	C10H14N2O6	258.23	3.706	Nucleotide And Its Derivates	ºËÜÕËá¼°ÆäÑÜÉúÎï	"1463-10-1"	68600	39350	49990	62220	37670	60140	43380	40020	23490	41510	47670	50720
Com_430_pos	LysoPC 18:0	ÈÜÑªÁ×Ö¬õ£µ¨¼î 18:0	C26H54NO7P	523.36	13.8	Phospholipid	Á×Ö¬		157900	94710	141000	91160	137800	70950	45960	116500	100500	109700	102600	78130
Com_431_pos	D-Glucosamine	D-°±»ùÆÏÌÑÌÇ	C6H13NO5	179.172	0.72	Amino Acid And Its Derivatives	°±»ùËá¼°ÆäÑÜÉúÎï	"3416-24-8"	77870	110900	92120	79890	89400	82990	82520	80370	65860	75510	77870	61520
Com_432_pos	Pseudouridine	¼ÙÄòÜÕ	C9H12N2O6	244.201	1.46	Nucleotide And Its Derivates	ºËÜÕËá¼°ÆäÑÜÉúÎï	"1445-07-4"	49080	26900	24150	36520	46830	40970	39470	28590	23790	37470	23480	29050
Com_433_pos	O-Acetyl-L-carnitine	ÒÒõ£»ù-L-Èâ¼î	C9H17lNO4	203.236	1.45	Carnitine	Èâ¼îÀà	"3040-38-8"	15440000	20580000	12950000	13260000	15740000	14630000	15680000	12360000	9194000	13380000	14600000	13710000
Com_434_pos	Thymine	ÐØÏÙà×à¤	C5H6N2O2	126.113	7.29	Nucleotide And Its Derivates	ºËÜÕËá¼°ÆäÑÜÉúÎï	"65-71-4"	1837	9870	3503	7302	27190	33080	28340	20920	99570	320600	470700	297500
Com_435_pos	XMP	5'-Á×Ëá»ÆÔ­°±Ëá	C10H11N4O9P--	362.19	1.43	Nucleotide And Its Derivates	ºËÜÕËá¼°ÆäÑÜÉúÎï	"523-98-8"	7619	4097	14930	7381	12140	8822	13680	22650	13210	8567	11710	17270
Com_436_pos	Tyramine	ÀÒ°·	C8H11NO	137.179	1.98	Benzene and substituted derivatives	±½¼°ÆäÑÜÉúÎï	"51-67-2"	27110	13990	9433	38010	35830	18290	33770	24810	24750	19040	24720	18910
Com_437_pos	Dimethyl phthalate	ÁÚ±½¶þ¼×Ëá¶þ¼×õ¥	C10H10O4	194.18	9.12	Organic Acid And Its Derivatives	ÓÐ»úËá¼°ÆäÑÜÉúÎï	"131-11-3"	2632000	2762000	2434000	2617000	2536000	2586000	2689000	2669000	2421000	3259000	2770000	2498000
Com_438_pos	Dibutyl phthalate	ÁÚ±½¶þ¼×Ëá¶þ¶¡õ¥	C16H22O4	278.34	13.61	Organic Acid And Its Derivatives	ÓÐ»úËá¼°ÆäÑÜÉúÎï	"84-74-2"	6786000	5178000	7998000	7361000	7733000	6764000	5098000	5811000	8988000	4365000	5811000	5322000
Com_439_pos	Dl-Threitol	ËÕÌÇ´¼	C4H10O4	122.12	0.69	Sugar Alcohols	ÌÇ´¼	"7493-90-5"	8285000	10240000	10950000	9044000	8911000	8414000	8539000	7349000	7395000	6739000	7798000	7494000
Com_440_pos	Dl-Tropic acid	ÍÐÆ·Ëá	C9H10O3	166.174	4.09	Organic Acid And Its Derivatives	ÓÐ»úËá¼°ÆäÑÜÉúÎï	"28845-94-5"	1934000	1110000	1132000	1542000	1786000	1416000	1691000	1123000	1761000	1482000	1394000	1372000
Com_441_pos	D-Myo-inositol 4-monophosohate	D-ÏËÎ¬´¼-4-Á×Ëá	C6H13O9P	260.136	0.92	Alcohols and polyols	´¼Àà¼°Æä¶àÔª´¼	"46495-39-0"	882300	12040000	6293000	1115000	1263000	1617000	1267000	789600	452700	2919000	2865000	3002000
Com_442_pos	Pantothenic acid	D-·ºËá	C9H17NO5	219.235	4.57	Vitamins	Î¬ÉúËØ	"79-83-4"	9697000	9066000	5478000	7800000	5206000	8397000	8885000	7948000	7847000	7176000	7090000	7185000
Com_443_pos	Ergosta-5,7,9(11),22-Tetraen-3-beta-Ol	È¥ÇâÂó½Ç¹Ì´¼	C28H42O	394.632	11.13	Hormones	¼¤ËØ	"516-85-8"	5778000	3787000	8268000	5925000	4031000	7053000	4764000	6587000	7236000	4639000	4556000	4568000
Com_444_pos	Ergosterol	Âó½Ç¹Ì´¼	C28H44O	396.648	11.13	Hormones	¼¤ËØ	"57-87-4"	107800	81750	154800	112000	70250	136300	95440	113000	143900	83150	91540	83110
Com_445_pos	Ergothioneine	Âó½ÇÁòÒò	C9H15N3O2S	229.299	1.03	Organic Acid And Its Derivatives	ÓÐ»úËá¼°ÆäÑÜÉúÎï	"497-30-3"	70560	67370	63850	52040	100900	73860	110700	67340	74870	72870	61340	68370
Com_446_pos	Dl-3-Hydroxynorvaline	DL-3-ôÇ»ùÕýçÓ°±Ëá	C5H11NO3	133.146	0.85	Amino Acid And Its Derivatives	°±»ùËá¼°ÆäÑÜÉúÎï	"2280-42-4"	5638000	5200000	7191000	5658000	7576000	9119000	5972000	6288000	10120000	7432000	6835000	6873000
Com_447_pos	6-Aminohexanoate	6-°±»ù¼ºËá	C6H13NO2	131.173	2.09	Organic Acid And Its Derivatives	ÓÐ»úËá¼°ÆäÑÜÉúÎï	"60-32-2"	12440000	5155000	6355000	10760000	13610000	8322000	10170000	4043000	14100000	9113000	8716000	8685000
Com_448_pos	3-Hydroxy-DL-kynurenine	3-ôÇ»ù-DL-È®ÄòËØ	C10H12N2O4	224.213	9.78	Ketones	ÍªÀà	"484-78-6"	249000	248700	244400	248100	260500	251900	244200	250000	250500	247100	246200	256200
Com_449_pos	Thioguanine	ÁòÄñàÑßÊ	C5H5N5S	167.192	18.3	Purines and purine derivatives	àÑßÊ¼°ÆäÑÜÉúÎï	"154-42-7"	10680	4276	9928	10590	4454	7726	10300	6546	21440	12720	8584	10300
Com_450_pos	L-Carnitine	×óÐýÈâ¼î	C7H15NO3	161.2	0.87	Carnitine	Èâ¼îÀà	"541-15-1"	62150000	72510000	54990000	43250000	47390000	68660000	57520000	59750000	44120000	59270000	59050000	56170000
Com_451_pos	Inosine	¼¡ÜÕ	C10H12N4O5	268.23	2.826	Nucleotide And Its Derivates	ºËÜÕËá¼°ÆäÑÜÉúÎï	"58-63-9"	11530000	17780000	9066000	3542000	19620000	16800000	18380000	28190000	16090000	15370000	15010000	15540000
Com_452_pos	Nicotinic Acid	ÑÌËá	C6H5NO2	123.11	1.478	Vitamins	Î¬ÉúËØ	"59-67-6"	281300	423100	308300	216100	647300	357500	438500	463000	454100	434800	350000	365500
Com_453_pos	Nicotinamide	ÑÌõ£°·	C6H6N2O	122.12	1.539	Vitamins	Î¬ÉúËØ	"98-92-0"	56450000	88770000	63580000	48800000	115700000	71880000	86760000	86930000	86550000	76980000	75570000	72640000
Com_454_pos	Triethyl phosphate	Á×ËáÈýÒÒõ¥	C6H15O4P	182.155	7.89	Organic Acid And Its Derivatives	ÓÐ»úËá¼°ÆäÑÜÉúÎï	"78-40-0"	4898000	4906000	4997000	4681000	4682000	4584000	4645000	4795000	5018000	4787000	4756000	4914000
Com_455_pos	Trimethyllysine	Èý¼×»ùÀµ°±Ëá	C9H21N2O2	189.275	1.03	Amino Acid And Its Derivatives	°±»ùËá¼°ÆäÑÜÉúÎï	"66989-56-8"	703400	651800	1386000	729900	1194000	1147000	893400	838700	809100	813400	668800	790100
Com_456_pos	Testosterone	ØºÍª	C19H28O2	288.424	0.72	Hormones	¼¤ËØ	"58-22-0"	1624000	2131000	2041000	1419000	1627000	1430000	1537000	1281000	1520000	1465000	1395000	1603000
Com_457_pos	Styrene	±½ÒÒÏ©	C8H8	104.149	10.53	Benzene and substituted derivatives	±½¼°ÆäÑÜÉúÎï	"100-42-5"	294900	291900	238600	231800	321600	193600	176600	242400	308100	239300	244100	194300
Com_458_pos	1-Methylhistidine	1-¼×»ù×é°±Ëá	C7H11N3O2	169.18	0.84	Amino Acid And Its Derivatives	°±»ùËá¼°ÆäÑÜÉúÎï	"332-80-9"	7624000	10200000	5007000	8367000	7826000	8705000	4674000	6128000	7140000	7329000	7038000	6977000
Com_459_pos	Furfural	¿·È©	C5H4O2	96.08	0.87	Aldehydes	È©Àà	"98-01-1"	37950	50400	36530	44090	54470	74130	73360	55870	62750	51590	52780	55070
Com_460_pos	Vidarabine	°¢ÌÇÏÙÜÕ	C10H13N5O4	267.24	2.56	Nucleotide And Its Derivates	ºËÜÕËá¼°ÆäÑÜÉúÎï	"5536-17-4"	1587000	11310000	6006000	480000	11820000	6899000	3909000	4491000	396900	4916000	4946000	4781000
Com_461_pos	Isonicotinic acid	ÒìÑÌËá	C6H5NO2	123.11	1.49	Pyridine And Its Derivatives	ßÁà¤¼°ÆäÑÜÉúÎï	"55-22-1"	6833000	10800000	7319000	5694000	15450000	8853000	11180000	10800000	10710000	9763000	9399000	9002000
Com_462_pos	2-Furoylglycine	N-(2-¿·õ£)¸Ê°±Ëá	C7H7NO4	169.13	0.79	Amino Acid And Its Derivatives	°±»ùËá¼°ÆäÑÜÉúÎï	"5657-19-2"	34480000	30890000	34350000	28680000	27680000	27530000	28340000	21760000	27280000	29720000	29030000	28220000
Com_463_pos	1-Methylxanthine	1-¼×»ù»ÆàÑßÊ	C6H6N4O2	166.14	4.09	Purines and purine derivatives	àÑßÊ¼°ÆäÑÜÉúÎï	"6136-37-4"	7579	13700	9045	12970	9489	30710	12490	15770	19630	13660	16290	13920
Com_464_pos	Picolinic acid	2-ßÁà¤¼×Ëá	C6H5NO2	123.11	1.48	Organoheterocyclic compounds	ÓÐ»úÔÓ»·»¯ºÏÎï	"98-98-6"	339300	495000	319100	305900	695300	435500	513300	474800	510500	434900	438900	448000
Com_465_pos	Phthalate	ÁÚ±½¶þ¼×Ëá	C8H6O4	166.13	4.07	Benzoic Acid And Its Derivatives	±½¼×Ëá¼°ÆäÑÜÉúÎï	"88-99-3"	1379000	740200	800100	1080000	1281000	1003000	1172000	800200	1296000	1003000	967000	978900
Com_466_pos	L-allo-Threonine	L-±ðËÕ°±Ëá	C4H9NO3	119.12	0.87	Amino Acid And Its Derivatives	°±»ùËá¼°ÆäÑÜÉúÎï	"28954-12-3"	8089000	3783000	4328000	7173000	9508000	7910000	6314000	3169000	7807000	7018000	6424000	6421000
Com_467_pos	L-allo-Isoleucine	L-±ðÒìÁÁ°±Ëá	C6H13NO2	131.17	2.28	Amino Acid And Its Derivatives	°±»ùËá¼°ÆäÑÜÉúÎï	"1509-34-8"	36540000	17180000	19910000	30310000	39880000	27480000	30820000	15230000	41840000	27780000	26830000	25960000
Com_468_pos	Asp-glu	L-Ìì¶¬°±õ£-L-¹È°±Ëá	C9H14N2O7	262.217	0.96	Amino Acid And Its Derivatives	°±»ùËá¼°ÆäÑÜÉúÎï	"6157-06-8"	17120	10390	12240	11020	12353	16850	12770	20100	20800	21690	11640	10980
Com_469_pos	Asp-Phe methyl ester	°¢Ë¹°ÍÌð	C14H18N2O5	294.303	5.36	Organic Acid And Its Derivatives	ÓÐ»úËá¼°ÆäÑÜÉúÎï	"22839-47-0"	97730	92770	126900	92850	112100	101600	132100	128900	128800	109700	103300	104000
Com_470_pos	Allopurinol	±ðàÑßÊ	C5H4N4O	136.111	2.69	Nucleotide And Its Derivates	ºËÜÕËá¼°ÆäÑÜÉúÎï	"315-30-0"	11200000	16230000	7976000	3447000	20170000	16020000	18190000	26950000	13670000	13610000	13650000	15460000
Com_471_pos	aminoimidazole carboxamide ribonucleotide	°±»ùßäßò¼×õ£°·ºËÌÇºËÜÕËá	C9H15N4O8P	338.211	16.98	Nucleotide And Its Derivates	ºËÜÕËá¼°ÆäÑÜÉúÎï	"68984-62-3"	338800	372100	325900	346800	307300	342800	277800	319200	353200	319900	338500	323100
Com_472_pos	2'-Hydroxy-5'-methylacetophenone	2'-ôÇ»ù-5'-¼×»ù±½ÒÒÍª	C9H10O2	150.174	8.74	Benzene and substituted derivatives	±½¼°ÆäÑÜÉúÎï	"1450-72-2"	549800	367600	516100	550500	312400	481700	325100	404700	479000	513400	353500	308500
Com_473_pos	2-Methylsuccinic Acid	¼×»ù¶¡¶þËá	C5H8O4	132.115	0.94	Organic Acid And Its Derivatives	ÓÐ»úËá¼°ÆäÑÜÉúÎï	"498-21-5"	35730000	37240000	34440000	35190000	37480000	37830000	36920000	37010000	33760000	36000000	35290000	34720000
Com_474_pos	Noradrenaline	È¥¼×ÉöÉÏÏÙËØ	C8H11NO3	169.178	6.36	Hormones	¼¤ËØ	"51-41-2"	22260	16260	26600	20170	21450	23530	29300	24380	17550	21500	19650	22110
Com_475_pos	N-carbamoyl-L-aspartate	N-°±¼×õ£-L-Ìì¶¬°±Ëá	C5H8N2O5	176.127	0.9	Amino Acid And Its Derivatives	°±»ùËá¼°ÆäÑÜÉúÎï	"13184-27-5"	105100	110900	76670	91700	216300	105300	265900	119900	372600	206800	169200	177900
Com_476_pos	Pyridoxine	ßÁ¶ß´¼	C8H11NO3	169.178	1.563	Pyridine And Its Derivatives	ßÁà¤¼°ÆäÑÜÉúÎï	"65-23-6"	38950	43651	44600	41781	19320	29490	30370	56380	111000	35320	33420	34570
Com_477_pos	Dopamine HCl	ÑÎËá¶à°Í°·	C8H12ClNO2	189.64	1.5	Phenols And Its Derivatives	·ÓÀà¼°ÆäÑÜÉúÎï	"62-31-7"	838400	868600	670500	437400	872300	694200	786100	916200	789100	965400	758300	633200
Com_478_pos	Epinephrine bitartrate	¾ÆÊ¯ËáÉöÉÏÏÙËØ	C13H19NO9	333.29	14.86	Hormones	¼¤ËØ	"51-42-3"	202400	129400	139300	236000	118200	119000	71660	110000	109300	99320	101400	84280
Com_479_pos	L-Serine	Ë¿°±Ëá	C3H7NO3	105.093	0.846	Amino Acid And Its Derivatives	°±»ùËá¼°ÆäÑÜÉúÎï	"56-45-1"	2053000	1445000	3119000	3180000	2146000	2800000	2186000	2019000	2971000	2773000	2628000	2589000
Com_480_pos	Hypoxanthine	´Î»ÆàÑßÊ	C5H4N4O	136.11	1.509	Nucleotide And Its Derivates	ºËÜÕËá¼°ÆäÑÜÉúÎï	"68-94-0"	69480000	62680000	62980000	43660000	81600000	67140000	89950000	59810000	76900000	66690000	66780000	61270000
Com_481_pos	L-Glutamate	L-¹È°±Ëá	C5H9NO4	147.129	0.886	Amino Acid And Its Derivatives	°±»ùËá¼°ÆäÑÜÉúÎï	"56-86-0"	79860000	58490000	78690000	85660000	67210000	68790000	59580000	91990000	102400000	74130000	72880000	73260000
Com_482_pos	D-2-Aminobutyric acid	D-2-°±»ù¶¡Ëá	C4H9NO2	103.12	0.947	Organic Acid And Its Derivatives	ÓÐ»úËá¼°ÆäÑÜÉúÎï	"2623-91-8"	17360000	15350000	15110000	15840000	16670000	19050000	17750000	22400000	24090000	19910000	17840000	16680000
Com_483_pos	DL-Norvaline	D-ÕýçÓ°±Ëá	C5H11NO2	117.15	1.068	Amino Acid And Its Derivatives	°±»ùËá¼°ÆäÑÜÉúÎï	"760-78-1"	27800000	11560000	15080000	27210000	33260000	18540000	23400000	11310000	30820000	21740000	20690000	20580000
Com_484_pos	Methionine	µ°°±Ëá	C5H11NO2S	149.211	1.46	Amino Acid And Its Derivatives	°±»ùËá¼°ÆäÑÜÉúÎï	"59-51-8"	6628000	3626000	4563000	5731000	10960000	9196000	4973000	2689000	10730000	5434000	6321000	5852000
Com_485_pos	3-Aminoisobutyric acid	3-°±»ùÒì¶¡Ëá	C4H9NO2	103.12	0.931	Amino Acid And Its Derivatives	°±»ùËá¼°ÆäÑÜÉúÎï	"144-90-1"	59970	43070	77190	71960	71200	59340	69580	82100	61110	73230	62340	67670
Com_486_pos	Anserine	¶ì¼¡ëÄ	C10H16N4O3	240.26	0.771	Organic Acid And Its Derivatives	ÓÐ»úËá¼°ÆäÑÜÉúÎï	"584-85-0"	328200000	296300000	326000000	285800000	294600000	282200000	290300000	234100000	281900000	297000000	296300000	279000000
Com_487_pos	(S)-2-Aminobutanoate	L-¦Á-°±»ù¶¡Ëá	C4H9NO2	103.12	0.947	Amino Acid And Its Derivatives	°±»ùËá¼°ÆäÑÜÉúÎï	"1492-24-6"	16030000	14660000	14060000	14720000	15810000	17660000	16420000	21160000	22540000	18360000	16650000	15650000
Com_488_pos	LysoPC 20:2	ÈÜÑªÁ×Ö¬õ£µ¨¼î 20:2	C28H54NO7P	547.36	13.26	Phospholipid	Á×Ö¬		269700	107800	213100	237600	180800	133200	258800	514700	237400	177400	171600	182200
Com_489_pos	1-Aminocyclopropane-1-carboxylic acid	1-°±»ù»·±ûÍéôÈËá	C4H7NO2	101.048	0.89	Amino Acid And Its Derivatives	°±»ùËá¼°ÆäÑÜÉúÎï	"22059-21-8"	1584000	1170000	1355000	1810000	1723000	1730000	2207000	2071000	1943000	1996000	1709000	1611000
Com_490_pos	Levodopa	×óÐý¶à°Í	C9H11NO4	197.19	1.019	Amino Acid And Its Derivatives	°±»ùËá¼°ÆäÑÜÉúÎï	"59-92-7"	19530000	14860000	13280000	16160000	21650000	15950000	12150000	19640000	14270000	17970000	17930000	16110000
Com_491_pos	Betaine	Ìð²Ë¼î	C5H11NO2	117.15	0.907	Organic Acid And Its Derivatives	ÓÐ»úËá¼°ÆäÑÜÉúÎï	"107-43-7"	35350000	26410000	50350000	30190000	40370000	43410000	32670000	36020000	48700000	38140000	34150000	34040000
Com_492_pos	Choline Hydroxide	µ¨¼î	C5H15NO2	121.18	0.828	Cholines	µ¨¼îÀà	"123-41-1"	6692000	3852000	6947000	5892000	8510000	7706000	6467000	5057000	1995000	6875000	6120000	6246000
Com_493_pos	Trimethylamine N-oxide	Èý¼×°·N-Ñõ»¯Îï	C3H9NO	75.11	0.872	Polyamine	¶à°·	"1184-78-7"	77760	159800	185300	61170	120900	108400	81330	108800	188100	149800	135900	110700
Com_494_pos	S-Adenosyl-L-methionine	S-ÏÙÜÕµ°°±Ëá	C15H22N6O5S	398.44	0.8	Amino Acid And Its Derivatives	°±»ùËá¼°ÆäÑÜÉúÎï	"29908-03-0"	89210	125200	102300	85940	142100	72610	107600	82930	104900	79690	85660	85180
Com_495_pos	Pipecolic acid	ßßà¤¼×Ëá	C6H11NO2	129.16	1.042	Organic Acid And Its Derivatives	ÓÐ»úËá¼°ÆäÑÜÉúÎï	"535-75-1"	24830000	19250000	23790000	23220000	23900000	28860000	21020000	33970000	33510000	26420000	27340000	25680000
Com_496_pos	Azelaic acid	ÈÉ¶þËá	C9H16O4	188.22	7.433	Fatty Acyls	Ö¬·¾õ£Àà	"123-99-9"	77360	80340	80450	80230	75340	61920	82180	67100	63610	68630	71550	78850
Com_497_pos	gamma-Glutamylglutamic acid	¦Ã-¹È°±õ£¹È°±Ëá	C10H16N2O7	276.243	1.05	Amino Acid And Its Derivatives	°±»ùËá¼°ÆäÑÜÉúÎï	"1116-22-9"	31450	45680	83050	66830	56560	57340	38420	118300	81990	82280	57230	69930
Com_498_pos	beta-Nicotinamide adenine dinucleotide phosphate	ÑÌõ£°·ÏÙàÑßÊ¶þºËÜÕËáÁ×Ëá	C21H29N7O17P3	744.41	1.03	Nucleotide And Its Derivates	ºËÜÕËá¼°ÆäÑÜÉúÎï	"53-59-8"	338500	73810	181600	246500	116300	88470	84190	85890	86100	132100	209800	113900
Com_499_pos	L-Pipecolate	L-ßßà¤Ëá	C6H11NO2	129.16	1.049	Amino Acid And Its Derivatives	°±»ùËá¼°ÆäÑÜÉúÎï	"3105-95-1"	1262000	951700	1186000	1141000	1119000	1352000	975000	1568000	1551000	1329000	1282000	1222000
Com_500_pos	gamma-Nonanolactone	¦Ã-ÈÉÄÚõ¥	C9H16O2	156.222	4.1	Esters	õ¥Àà	"104-61-0"	304000	159800	189600	250800	272100	233100	271600	184000	312900	257900	267900	224500
Com_501_pos	UDP-N-acetylglucosamine	Äòà×à¤¶þÁ×Ëá-N-ÒÒõ£ÆÏÌÇ°·	C17H27N3O17P2	607.354	0.99	Nucleotide And Its Derivates	ºËÜÕËá¼°ÆäÑÜÉúÎï	"528-04-1"	86240	41500	77430	95900	45600	39110	64990	26030	37380	51000	53420	57110
Com_502_pos	Choline Chloride	ÂÈ»¯µ¨¼î	C5H14ClNO	139.62	0.83	Cholines	µ¨¼îÀà	"67-48-1"	3557000	2213000	3577000	2863000	4459000	3946000	3305000	2546000	1050000	3795000	3486000	3141000
Com_503_pos	1-Methylguanine	1-¼×»ùÄñàÑßÊ	C6H7N5O	165.153	4.03	Nucleotide And Its Derivates	ºËÜÕËá¼°ÆäÑÜÉúÎï	"938-85-2"	85030	65330	61720	61830	73000	69120	70960	54890	76970	58210	74940	66140
Com_504_pos	Serotonin	5-ôÇ»ùÉ«°·	C10H12N2O	176.215	2.94	Indole And Its Derivatives	ßÅßá¼°ÆäÑÜÉúÎï	"50-67-9"	32050	51200	46910	49280	59110	19150	55330	25730	73210	40220	41220	34240
Com_505_pos	1-Palmitoyl-Sn-Glycero-3-Phosphocholine	1-Ê®Áùõ£-SN-±ûÈý´¼-Á×Ëáµ¨¼î	C24H50NO7P	495.63	12.52	Phospholipid	Á×Ö¬	"17364-16-8"	1005000	478400	1076000	1002000	1052000	443600	524800	1193000	978500	752900	805500	739700
Com_506_pos	1-Stearoyl-Sn-Glycerol-3-Phosphocholine	1-Ó²Ö¬õ£-SN-¸ÊÓÍ-3-Á×õ£µ¨¼î	C26H54NO7P	523.683	13.78	Phospholipid	Á×Ö¬	"19420-57-6"	92600	58510	88170	64880	117700	66080	22980	90380	65540	76020	66190	60600
Com_507_pos	2-(3,4-dimethoxyphenyl)ethanamine	2-(3,4-¶þ¼×Ñõ»ù±½»ù)ÒÒ°·	C10H15NO2	181.232	1.81	Benzene and substituted derivatives	±½¼°ÆäÑÜÉúÎï	"120-20-7"	12000000	5397000	6208000	10120000	13350000	7786000	10280000	10580000	11550000	9829000	9630000	9303000
Com_508_pos	2-(Dimethylamino)Guanosine	¶þ¼×»ùÄñÜÕ	C12H17N5O5	311.294	4.57	Nucleotide And Its Derivates	ºËÜÕËá¼°ÆäÑÜÉúÎï	"2140-67-2"	315500	207500	209300	225800	274400	257100	256600	220600	273200	190000	234300	241400
Com_509_pos	1-Methylguanosine	1-¼×»ùÄñÜÕ	C11H15N5O5	297.267	4.04	Nucleotide And Its Derivates	ºËÜÕËá¼°ÆäÑÜÉúÎï	"2140-65-0"	406600	239200	251100	253100	319900	358300	269400	252200	329700	251700	261400	296300
Com_510_pos	1-Methylnicotinamide	1-¼×»ùÑÌõ£°·	C7H9N2O+	137.159	2.68	Pyridine And Its Derivatives	ßÁà¤¼°ÆäÑÜÉúÎï	"3106-60-3"	3706000	5816000	2637000	1211000	6205000	5564000	5546000	9417000	4729000	4841000	4862000	5038000
Com_511_pos	1-Methyluric acid	1-¼×»ùÄòËá	C6H6N4O3	182.137	7.86	Organic Acid And Its Derivatives	ÓÐ»úËá¼°ÆäÑÜÉúÎï	"708-79-2"	1694000	1643000	1611000	1650000	1658000	1592000	1618000	1639000	1527000	1719000	1595000	1678000
Com_512_pos	1-Oleoyl-Sn-Glycero-3-Phosphocholine	ÓÍõ£Á×Ëáµ¨¼î	C26H52NO7P	521.667	12.82	Phospholipid	Á×Ö¬	"19420-56-5"	7494000	4451000	7469000	8287000	8645000	4887000	4790000	10490000	6660000	5057000	4955000	5241000
Com_513_pos	L-Hydroxylysine	5-ôÇ»ù-L-Àµ°±Ëá	C6H14N2O3	163.195	0.9	Amino Acid And Its Derivatives	°±»ùËá¼°ÆäÑÜÉúÎï	"1190-94-9"	36900	57520	41760	43470	42990	55020	53310	34700	28870	46240	36510	31710
Com_514_pos	DL-Leucine	DL-ÁÁ°±Ëá	C6H13NO2	131.173	2.3	Amino Acid And Its Derivatives	°±»ùËá¼°ÆäÑÜÉúÎï	"328-39-2"	2772000	1290000	1504000	2339000	3258000	2140000	2410000	1125000	3254000	2085000	2033000	2012000
Com_515_pos	Dl-Indole-3-lactic acid	DL-ßÅßá-3-ÈéËá	C11H11NO3	205.21	4.87	Organic Acid And Its Derivatives	ÓÐ»úËá¼°ÆäÑÜÉúÎï	"832-97-3"	19370000	12000000	13080000	19800000	23200000	16510000	23620000	17070000	21390000	17240000	17260000	17250000
Com_516_pos	Dl-Norleucine	DL-ÕýÁÁ°±Ëá	C6H13NO2	131.173	0.9	Amino Acid And Its Derivatives	°±»ùËá¼°ÆäÑÜÉúÎï	"616-06-8"	33900000	23380000	45360000	25820000	36640000	41260000	32220000	32010000	38760000	36600000	30700000	31950000
Com_517_pos	N-acetyl-glutamate	N-ÒÒõ£-¹È°±Ëá	C7H11NO5	189.166	1.67	Amino Acid And Its Derivatives	°±»ùËá¼°ÆäÑÜÉúÎï		202800	470900	233700	214600	258400	234000	894800	308800	417900	326500	361200	355300
Com_518_pos	N-Acetylglycine	N-ÒÒõ£»ù¸Ê°±Ëá	C4H7NO3	117.103	0.9	Amino Acid And Its Derivatives	°±»ùËá¼°ÆäÑÜÉúÎï	"543-24-8"	31840000	22320000	48470000	31430000	42320000	39210000	30280000	38050000	45290000	38520000	37340000	32680000
Com_519_pos	N-Acetylhistamine	ÒÒõ£»ù×é°·	C7H11N3O	153.182	2.73	Amino Acid And Its Derivatives	°±»ùËá¼°ÆäÑÜÉúÎï	"673-49-4"	96390	145900	64520	28640	142600	157100	168400	256100	117100	121700	130900	125500
Com_520_pos	N-Acetylthreonine	N-ÒÒõ£»ùËÕ°±Ëá	C6H11NO4	161.156	1.74	Amino Acid And Its Derivatives	°±»ùËá¼°ÆäÑÜÉúÎï	"17093-74-2"	149800	141600	170400	131800	159000	120500	133800	144000	86920	115600	106700	81230
Com_521_pos	Feruloyl Putrescine	°¢Îºõ£¸¯°·	C14H20N2O3	264.32	15.1	Phenolamides	·Ó°·	"501-13-3"	1445000	1177000	1307000	1638000	989400	988200	840200	1164000	1092000	942900	1053000	1007000
Com_522_pos	L-Lysinamide	Àµ°±õ£°·	C6H15N3O	145.2	4.91	Amino Acid And Its Derivatives	°±»ùËá¼°ÆäÑÜÉúÎï	"32388-19-5"	1176000	742700	847300	1274000	1432000	929700	1365000	1001000	1279000	1029000	1048000	1008000
Com_523_pos	Phosphoethanolamine	Á×ËáÒÒ´¼°·	C2H8NO4P	141.063	0.86	Organic Acid And Its Derivatives	ÓÐ»úËá¼°ÆäÑÜÉúÎï	"1071-23-4"	687300	497600	1260000	807000	549000	545900	639100	737400	968600	973400	884800	796200
Com_524_pos	Calcium phosphorylcholine chloride	ÂÈ»¯Á×õ£µ¨¼î¸ÆÑÎ	C5H13NO4P.Ca.Cl	257.666	0.87	Cholines	µ¨¼îÀà	"4826-71-5"	15620000	8002000	26840000	10150000	15120000	12490000	11970000	12630000	16390000	15880000	14670000	13750000
Com_525_pos	Pyridoxine O-Glucoside	ßÁ¶ß´¼ÆÏÌÑÌÇÜÕ	C14H21NO8	331.127	0.99	Pyridine And Its Derivatives	ßÁà¤¼°ÆäÑÜÉúÎï		361000	225100	473700	363800	692200	402700	500300	251700	407200	399000	413300	385700
Com_526_pos	Cyprodinil	à×¾ú»·°·	C14H15N3	225.289	9.02	Benzene and substituted derivatives	±½¼°ÆäÑÜÉúÎï	"121552-61-2"	273500	276200	289700	272900	275100	262300	254000	264900	310100	269600	277000	283300
Com_527_pos	N-Methyl-a-aminoisobutyric acid	N-¼×»ù-¦Á-°±»ùÒì¶¡Ëá	C5H11NO2	117.146	1.22	Organic Acid And Its Derivatives	ÓÐ»úËá¼°ÆäÑÜÉúÎï	"2566-34-9"	23880000	10120000	13000000	23470000	28060000	16620000	19720000	9992000	26090000	18780000	17670000	17920000
Com_528_pos	Niflumic Acid	·úÄáËá	C13H9F3N2O2	282.218	15.12	Others	ÆäËü	"4394-00-7"	5763000	4319000	4527000	6323000	4295000	4221000	2980000	4109000	4082000	3589000	4128000	3501000
Com_529_pos	N¦Å-(1-Carboxymethyl)-L-lysine	N¦Å-(1-ôÈ¼×»ù)-L-Àµ°±Ëá	C8H16N2O4	204.224	0.84	Amino Acid And Its Derivatives	°±»ùËá¼°ÆäÑÜÉúÎï	"5746-04-3"	190300	157800	123600	392500	105100	186100	109700	257100	227100	194700	184700	174400
Com_530_pos	Oxymetazoline	ôÇ¼×ßòßø	C16H24N2O	260.375	5.06	Benzene and substituted derivatives	±½¼°ÆäÑÜÉúÎï	"1491-59-4"	597500	534300	592400	508500	622500	585600	583100	554800	591100	1355000	1336000	1326000
Com_531_pos	N¦Å,N¦Å,N¦Å-trimethyllysine	N¦Å,N¦Å,N¦Å-Èý¼×»ùÀµ°±Ëá	C9H20N2O2	188.267	0.76	Amino Acid And Its Derivatives	°±»ùËá¼°ÆäÑÜÉúÎï	"19253-88-4"	12730000	13600000	13180000	11870000	14270000	13770000	14800000	11730000	11550000	11460000	12040000	12560000
Com_532_pos	19-Norethisterone	È²ÅµÍª	C20H26O2	298.419	15.11	Others	ÆäËü	"68-22-4"	58220	33150	66240	65730	44190	61050	33930	56880	46910	45090	35370	61380
Com_533_pos	N-Methyl-L-arginine hydrochloride	N'-µ¥¼×»ù-L-¾«°±ËáÑÎËáÑÎ	C7H16N4O2	188.23	0.95	Amino Acid And Its Derivatives	°±»ùËá¼°ÆäÑÜÉúÎï	"156706-47-7"	115400	53090	90390	106800	130500	146300	139700	160700	120200	101900	111000	112500
Com_534_pos	N-Tetradecanamide	N-ÕýÊ®ËÄÍé»ùï§	C14H29NO	227.386	13.59	Fatty Acyls	Ö¬·¾õ£Àà	"638-58-4"	768300	693100	718600	818500	702800	629100	586800	633200	670400	615300	617400	594100
Com_535_pos	5,6-Dihydro-5-methyluracil	5,6-¶þÇâÐØÏÙà×à¤	C5H8N2O2	128.13	0.69	Pyrimidines and pyrimidine derivatives	à×à¤¼°ÆäÑÜÉúÎï	"696-04-8"	592300	1052000	1213000	1704000	803800	1329000	994400	774100	934900	929700	969700	895900
Com_536_pos	N-Methylnicotinamine	N-¼×»ùÑÌõ£°·	C7H8N2O	136.15	1.82	Pyridine And Its Derivatives	ßÁà¤¼°ÆäÑÜÉúÎï	"114-33-0"	13010	15990	11660	17650	27150	17360	18020	28520	27050	18940	13080	20730
Com_537_pos	Trigonelline	ºùÂ«°Í¼î	C7H7NO2	137.14	0.94	Alkaloids and derivatives	ÉúÎï¼î¼°ÆäÑÜÉúÎï	"535-83-1"	654400	627800	673400	515500	429400	540800	775300	822600	797500	705200	607900	499200
Com_538_pos	2-Piperidinone	2-ßßà¤Íª	C5H9NO	99.132	4.15	Organoheterocyclic compounds	ÓÐ»úÔÓ»·»¯ºÏÎï	"675-20-7"	112300	213700	192800	204200	124200	123100	78260	319600	136200	174200	166200	159500
Com_539_pos	Phloretate	¶ÔôÇ»ù±½±ûËá	C9H10O3	166.177	4.05	Fatty Acyls	Ö¬·¾õ£Àà	"501-97-3"	10720000	5724000	5980000	8211000	9676000	7766000	9058000	6078000	9988000	7683000	7545000	7537000
Com_540_pos	Alpha-Linolenic acid	¦Á-ÑÇÂéËá	C18H30O2	278.435	12.64	Eicosanoid	Ñõ»¯Ö¬ÖÊ	"463-40-1"	85560	80670	134400	123300	140400	57630	153400	180500	165400	126100	126600	125200
Com_541_pos	3-Methylindole	3-¼×»ùßÅßá	C9H9N	131.177	4.87	Indole And Its Derivatives	ßÅßá¼°ÆäÑÜÉúÎï	"83-34-1"	183600	119900	143800	217900	214400	173900	209500	171200	204400	186700	171500	160500
Com_542_pos	isoleucine	ÒìÁÁ°±Ëá	C6H13NO2	131.17	2.11	Amino Acid And Its Derivatives	°±»ùËá¼°ÆäÑÜÉúÎï	"73-32-5"	150000000	71240000	82620000	125700000	163500000	112500000	124600000	62340000	172500000	112500000	110700000	111100000
Com_543_pos	Creatinine	¼¡Ëáôû	C4H7N3O	113.12	0.898	Organic Acid And Its Derivatives	ÓÐ»úËá¼°ÆäÑÜÉúÎï	"60-27-5"	2372000	2431000	2400000	2452000	2161000	2196000	2290000	2256000	2206000	2691000	2668000	2523000
Com_544_pos	L-Citrulline	L-¹Ï°±Ëá	C6H13N3O3	175.19	0.89	Amino Acid And Its Derivatives	°±»ùËá¼°ÆäÑÜÉúÎï	"372-75-8"	335600	296100	226100	292900	319800	361700	300900	469600	339800	313900	286000	298300
Com_545_pos	L-Leucine	L-ÁÁ°±Ëá	C6H13NO2	131.17	2.32	Amino Acid And Its Derivatives	°±»ùËá¼°ÆäÑÜÉúÎï	"61-90-5"	82910000	38920000	44940000	68670000	92410000	62720000	68240000	34450000	96350000	62890000	62000000	61380000
Com_546_pos	Urocanic acid	Äò¿¯Ëá	C6H6N2O2	138.12	1.04	Organic Acid And Its Derivatives	ÓÐ»úËá¼°ÆäÑÜÉúÎï	"104-98-3"	99630	99060	89480	72510	110500	97940	102500	161600	184000	124900	99850	103500
Com_547_pos	D-Glutamine	D-¹È°±õ£°·	C5H10N2O3	146.14	0.86	Amino Acid And Its Derivatives	°±»ùËá¼°ÆäÑÜÉúÎï	"5959-95-5"	79620000	64030000	78890000	68840000	81540000	97990000	75750000	109300000	104800000	94200000	89450000	84420000
Com_548_pos	L-Ornithine	Äñ°±Ëá	C5H12N2O2	132.16	0.762	Amino Acid And Its Derivatives	°±»ùËá¼°ÆäÑÜÉúÎï	"70-26-8"	559400	495500	514300	538400	553600	767300	612000	376200	652300	499100	488700	516700
Com_549_pos	LysoPE 18:2	ÈÜÑªÁ×Ö¬õ£ÒÒ´¼°· 18:2	C23H44NO7P	477.6	12.08	Phospholipid	Á×Ö¬		20650	14230	23840	28910	31550	14800	29340	33590	25340	41020	30630	29070
Com_550_pos	LysoPC 10:0	ÈÜÑªÁ×Ö¬õ£µ¨¼î (1-õ£»ù10:0)	C18H38NO7P	411.3	6.25	Phospholipid	Á×Ö¬		7766	7192	8476	8166	10040	27750	10460	7506	5512	10720	9281	10690
Com_551_pos	2-Hydroxy-6-Aminopurine	2-ôÇ»ù-6-°±»ùàÑßÊ	C5H5N5O	151.126	2.76	Nucleotide And Its Derivates	ºËÜÕËá¼°ÆäÑÜÉúÎï	"3373-53-3"	758400	196700	416900	124300	444100	210700	411900	520200	635000	376400	384300	393500
Com_552_pos	N-Acetyl-Dl-glutamic acid	N-ÒÒõ£-DL-¹È°±Ëá	C7H11NO5	189.166	1.84	Amino Acid And Its Derivatives	°±»ùËá¼°ÆäÑÜÉúÎï	"5817-08-3"	444300	795400	382500	423400	486100	402300	1590000	556400	821300	723300	734800	619900
Com_553_pos	N6-Succinyl Adenosine	N6-çúçêõ£ÏÙÜÕ	C14H17N5O8	383.313	4.54	Nucleotide And Its Derivates	ºËÜÕËá¼°ÆäÑÜÉúÎï	"4542-23-8"	85680	206100	204500	118500	251300	117700	242000	135100	173700	156400	141200	152300
Com_554_pos	N-Acetyl-L-histidine	N-ÒÒõ£-L-×é°±Ëá	C8H11N3O3	197.191	1.0	Amino Acid And Its Derivatives	°±»ùËá¼°ÆäÑÜÉúÎï	"2497-02-1"	54770000	44800000	38830000	48010000	61410000	43760000	35830000	55750000	42700000	50280000	50280000	45700000
Com_555_pos	2-Phenylglycine	DL-±½¸Ê°±Ëá	C8H9NO2	151.163	2.78	Amino Acid And Its Derivatives	°±»ùËá¼°ÆäÑÜÉúÎï	"2835-06-5"	690300	176200	373300	112200	452400	198300	391800	522900	647400	344300	358200	371800
Com_556_pos	O-Acetyl-L-homoserine	O-ÒÒõ£»ù-L-¸ßË¿°±Ëá	C6H11NO4	161.16	1.0	Amino Acid And Its Derivatives	°±»ùËá¼°ÆäÑÜÉúÎï		19520000	21020000	17670000	13290000	14730000	21900000	17330000	19090000	12870000	17210000	16780000	16820000
Com_557_pos	NG,NG-Dimethyl-L-arginine	N,N-¶þ¼×»ù¾«°±Ëá	C8H20Cl2N4O2	202.254	0.93	Amino Acid And Its Derivatives	°±»ùËá¼°ÆäÑÜÉúÎï	"220805-22-1"	98860	166000	114200	184400	99380	146000	164200	299100	179600	180400	138200	150800
Com_558_pos	Cytarabine	°¢ÌÇ°ûÜÕ	C9H13N3O5	243.22	1.0	Nucleotide And Its Derivates	ºËÜÕËá¼°ÆäÑÜÉúÎï	"147-94-4"	518800	383300	668800	671100	737900	373000	650400	1231000	1002000	577400	644200	1190000
Com_559_pos	Cuminaldehyde	¿ÝÜøÈ©	C10H12O	148.2	4.06	Prenol lipids	Ï©´¼õ¥	"122-03-2"	249300	167200	169200	200000	203400	192200	198000	140400	211900	175000	194000	166900
Com_560_pos	Cytidine-5-Triphosphate	°ûÜÕ-5-ÈýÁ×Ëá	C9H16N3O14P3	483.16	1.79	Nucleotide And Its Derivates	ºËÜÕËá¼°ÆäÑÜÉúÎï	"36051-68-0"	2768	4407	2350	5607	11480	10079	9594	5769	3199	6499	5609	4188
Com_561_pos	2-Deoxy-D-galactose	2-ÍÑÑõ-D-°ëÈéÌÇ	C6H12O5	164.156	0.69	Carbohydrates And Its Derivatives	ÌÇÀà¼°ÆäÑÜÉúÎï	"1949-89-9"	2450000	2844000	2910000	2509000	3520000	3193000	3682000	3067000	2836000	2154000	2725000	3096000
Com_562_pos	dAMP	2'-ÍÑÑõÏÙÜÕ-5'-µ¥Á×Ëá	C10H14N5O6P	331.222	1.47	Nucleotide And Its Derivates	ºËÜÕËá¼°ÆäÑÜÉúÎï	"653-63-4"	3917000	3202000	4333000	3893000	3756000	3010000	2838000	2491000	2856000	2640000	3117000	3908000
Com_563_pos	2-Methylbutyroylcarnitine	2-¼×»ù¶¡õ£Èâ¶¾¼î	C12H23NO4	245.315	5.45	Fatty Acyls	Ö¬·¾õ£Àà	"31023-25-3"	1489000	3060000	1823000	1810000	2984000	2861000	3364000	2540000	1681000	2170000	2253000	2195000
Com_564_pos	2'-Deoxyguanosine-5'-monophosphate	2-ÍÑÑõÄñÜÕ-5-µ¥Á×Ëá	C10H14N5O7P	347.221	1.66	Nucleotide And Its Derivates	ºËÜÕËá¼°ÆäÑÜÉúÎï	"312693-67-7"	8258	9656	10950	4003	10280	5064	15290	10700	13690	7594	7904	5991
Com_565_pos	L-2-Aminoadipic acid	°±»ù¼º¶þËá	C6H11NO4	161.156	0.91	Organic Acid And Its Derivatives	ÓÐ»úËá¼°ÆäÑÜÉúÎï	"542-32-5"	1015000	202500	569800	428600	608000	517900	531500	247600	658400	577100	516800	497100
Com_566_pos	22(S)-Hydroxycholesterol	22(S)-ôÇ»ùµ¨¹Ì´¼	C27H46O2	402.653	0.98	Bile Acids	µ¨Ö­Ëá	"22348-64-7"	19610	22620	15170	12540	8080	5606	15600	9800	12040	13490	8020	19550
Com_567_pos	2-Aminooctanoic acid	2-°±»ùÐÁËá	C8H17NO2	159.226	1.03	Organic Acid And Its Derivatives	ÓÐ»úËá¼°ÆäÑÜÉúÎï	"2187-07-7"	434600	281900	450300	339900	351000	501100	477700	397300	332200	501000	432300	385300
Com_568_pos	Hypotaurine	2-°±»ùÒÒÍéÑÇ»ÇËá	C2H7NO2S	109.147	0.94	Organic Acid And Its Derivatives	ÓÐ»úËá¼°ÆäÑÜÉúÎï	"300-84-5"	123900	52370	72200	69700	41170	42220	48570	58100	37320	46910	72370	45670
Com_569_pos	2,6-Dimethylaniline	2,6-¶þ¼×»ù±½°·	C8H11N	121.18	4.07	Benzene and substituted derivatives	±½¼°ÆäÑÜÉúÎï	"87-62-7"	57350	31870	43260	49265	58940	53880	44830	20970	62960	58500	50320	49400
Com_570_pos	2-(Formylamino)Benzoic Acid	2-(¼×õ£°±»ù)±½¼×Ëá	C8H7NO3	164.138	4.07	Benzoic Acid And Its Derivatives	±½¼×Ëá¼°ÆäÑÜÉúÎï	"3342-77-6"	17100000	9102000	9777000	13060000	15340000	12480000	14380000	9527000	15710000	12430000	12130000	11930000
Com_571_pos	L-Cysteine-glutathione gisulfide	L-°ëë×°±Ëá¹Èë×¸ÊëÄ¶þÁò»¯Îï	C13H22N4O8S2	426.466	0.96	Amino Acid And Its Derivatives	°±»ùËá¼°ÆäÑÜÉúÎï	"13081-14-6"	94850	19350	14640	72710	52200	27880	79210	65210	183900	67090	76910	70050
Com_572_pos	L-Cystathionine	L-ë×ÁòÃÑ	C7H14N2O4S	222.262	0.84	Amino Acid And Its Derivatives	°±»ùËá¼°ÆäÑÜÉúÎï	"56-88-2"	114800	88570	78280	68780	100000	59180	107600	144900	111200	96420	95870	100300
Com_573_pos	L-Methionine Methyl Ester	L-µ°°±Ëá¼×õ¥	C6H14ClNO2S	199.699	0.95	Amino Acid And Its Derivatives	°±»ùËá¼°ÆäÑÜÉúÎï	"2491-18-1"	182600	238000	199200	136300	134100	181800	190100	161600	133600	189800	163500	138900
Com_574_pos	Methionine sulfoxide	µ°°±Ëáí¿	C5H11NO4S	181.21	0.92	Amino Acid And Its Derivatives	°±»ùËá¼°ÆäÑÜÉúÎï	"62697-73-8"	147400	162800	145200	99670	156900	155000	181300	128500	115900	147700	133600	119800
Com_575_pos	L-Saccharopine	L-½ÍÄ¸°±Ëá	C11H20N2O6	276.286	1.03	Amino Acid And Its Derivatives	°±»ùËá¼°ÆäÑÜÉúÎï	"997-68-2"	832900	1434000	280800	410700	326500	248400	340900	122600	260500	485200	443300	458100
Com_576_pos	L-Methionine sulfone	L-µ°°±Ëáí¿	C5H11NO4S	181.21	1.84	Amino Acid And Its Derivatives	°±»ùËá¼°ÆäÑÜÉúÎï	"7314-32-1"	55450000	28300000	33360000	49760000	65620000	40130000	50680000	53710000	57370000	44540000	44320000	46020000
Com_577_pos	L-Tyrosine	L-ÀÒ°±Ëá	C9H11NO3	181.189	1.84	Amino Acid And Its Derivatives	°±»ùËá¼°ÆäÑÜÉúÎï	"60-18-4"	57280000	29770000	34590000	51050000	66640000	42030000	51650000	56910000	59640000	46090000	46070000	47880000
Com_578_pos	L-Canavanine	L-¶¹°±Ëá	C5H12N4O3	176.174	2.96	Amino Acid And Its Derivatives	°±»ùËá¼°ÆäÑÜÉúÎï	"543-38-4"	46090	65120	60900	56400	70040	16150	63500	33780	88850	51910	50890	42310
Com_579_pos	L-Alanyl-L-Lysine	L-±û°±õ£-Àµ°±Ëá	C9H19N3O3	217.265	2.57	Amino Acid And Its Derivatives	°±»ùËá¼°ÆäÑÜÉúÎï	"5051-06-9"	23680	40100	46000	21630	28100	41830	67500	36110	23840	33730	33260	23890
Com_580_pos	Oleamide	ÓÍËáõ£°·	C18H35NO	281.5	15.08	Fatty Acyls	Ö¬·¾õ£Àà	"301-02-0"	168000000	125600000	146200000	194200000	131800000	131700000	93050000	134000000	128900000	114800000	116200000	115200000
Com_581_pos	Indole-3-acetamide	ßÅßá-3-ÒÒõ£°·	C10H10N2O	174.2	0.81	Indole And Its Derivatives	ßÅßá¼°ÆäÑÜÉúÎï	"879-37-8"	198600	247400	128500	399700	242500	277100	377200	933800	324500	368400	351000	358900
Com_582_pos	Stachydrine	Ë®ËÕ¼î	C7H13NO2	143.18	0.97	Amino Acid And Its Derivatives	°±»ùËá¼°ÆäÑÜÉúÎï	"471-87-4"	2822000	2834000	2873000	2174000	1933000	2292000	2437000	2068000	1904000	2457000	2613000	2052000
Com_583_pos	2-Pyrrolidinone	2-ßÁ¿©ÍéÍª	C4H7NO	85.1	2.04	Organoheterocyclic compounds	ÓÐ»úÔÓ»·»¯ºÏÎï	"616-45-5"	649100	267400	313800	570700	676200	369500	517600	200100	647800	487600	454600	430100
Com_584_pos	7,8-dihydro-L-Biopterin	7,8-¶þÇâL-ÉúÎïµûßÊ	C9H13N5O3	239.23	1.85	Organoheterocyclic compounds	ÓÐ»úÔÓ»·»¯ºÏÎï	"6779-87-9"	14500	9748	5932	6334	12370	11060	12970	8380	6847	14530	9883	13990
Com_585_pos	Acetylcarnitine	ÒÒõ£Èâ¼î	C9H17NO4	203.236	1.44	Carnitine	Èâ¼îÀà	"14992-62-2"	43560000	56020000	39180000	37930000	41500000	42950000	46810000	39870000	27420000	40070000	41660000	42180000
Com_586_pos	Acetylchloline Chloride	ÂÈ»¯ÒÒõ£µ¨¼î	C7H16NO2	146.21	0.9	Cholines	µ¨¼îÀà	"60-31-1"	401500	157000	214600	202100	107500	220700	200600	218100	147700	233900	267600	150200
Com_587_pos	Adipamide	¼º¶þõ£¶þ°·	C6H12N2O2	144.172	0.84	Hormones	¼¤ËØ	"628-94-4"	19550	24430	29480	24950	12760	12020	17510	12410	12570	14930	18950	7949
Com_588_pos	Ala-gly	L-±û°±õ£¸Ê°±Ëá	C5H10N2O3	146.144	0.84	Amino Acid And Its Derivatives	°±»ùËá¼°ÆäÑÜÉúÎï	"687-69-4"	7361000	5680000	7145000	6047000	7227000	9640000	6949000	10780000	10050000	8395000	7696000	7531000
Com_589_pos	Adenylocuccinic Acid	ÏÙÜÕËá»ùçúçêËá	C14H18N5O11P	463.293	3.68	Organic Acid And Its Derivatives	ÓÐ»úËá¼°ÆäÑÜÉúÎï	"19046-78-7"	331200	372500	301400	220400	764800	196200	30900	25170	3456	81030	224500	104600
Com_590_pos	S-adenosyl-L-methioninamine	S-ÏÙÜÕ-L-µ°°±Ëá°·	C15H22N6O5S	398.437	0.86	Amino Acid And Its Derivatives	°±»ùËá¼°ÆäÑÜÉúÎï	"91279-78-6"	20270	69610	36750	27540	23900	30180	24800	64870	78820	31930	41190	34320
Com_591_pos	5-Methoxyindole-3-Carbaldehyde	4-¼×Ñõ»ù-ßÅßá-3-¼×È©	C10H9NO2	175.184	11.35	Indole And Its Derivatives	ßÅßá¼°ÆäÑÜÉúÎï	"10601-19-1"	190700	177900	179100	180600	220400	154600	230600	205700	259200	231700	210600	223400
Com_592_pos	Protocatechualdehyde	Ô­¶ù²èÈ©	C7H6O3	138.12	1.54	Phenols And Its Derivatives	·ÓÀà¼°ÆäÑÜÉúÎï	"139-85-5"	40750	60580	51300	35650	95640	79240	68770	70380	34580	52990	66660	41490
Com_593_pos	Spermine	¾«°·	C10H26N4	202.34	0.73	Polyamine	¶à°·	"71-44-3"	3431000	29040000	20520000	3444000	5678000	2548000	5900000	2196000	2015000	3996000	5489000	6461000
Com_594_pos	Histamine	×é°·	C5H9N3	111.15	0.699	Amino Acid And Its Derivatives	°±»ùËá¼°ÆäÑÜÉúÎï	"51-45-6"	2905000	2035000	6166000	2503000	4193000	1609000	1472000	2330000	3084000	2868000	2756000	2626000
Com_595_pos	(+,-)-Octopamine HCl	ÕÂÓã°·	C8H12ClNO2	189.64	1.034	Polyamine	¶à°·	"770-05-8"	5295000	5148000	5559000	5373000	4998000	5454000	4722000	5666000	5365000	5788000	5228000	4906000
Com_596_pos	Sepiapterin	Ä«à©ßÊ	C9H11N5O3	237.22	0.84	Organoheterocyclic compounds	ÓÐ»úÔÓ»·»¯ºÏÎï	"17094-01-8"	27860	16580	53900	30310	21310	11060	27860	22470	18070	24520	27160	26030
Com_597_pos	11-cis-Retinol	11-Ë³ÊÓ»Æ´¼	C20H30O	286.5	12.17	Prenol lipids	Ï©´¼õ¥	"22737-96-8"	2403	8224	1925	2677	4076	10079	3485	5761	2777	1851	2538	2333
Com_598_pos	Quinone	±½õ«	C6H4O2	108.09	7.24	Ketones	ÍªÀà	"106-51-4"	30220	53410	52920	38450	37680	46240	38680	29050	31590	2028000	1926000	1831000
Com_599_pos	L-Leucyl-L-alanine Hydrate	L-ÁÁ°±Ëá-L-±û°±Ëá	C9H18N2O3	202.25	3.0	Amino Acid And Its Derivatives	°±»ùËá¼°ÆäÑÜÉúÎï	"7298-84-2"	117600	221400	48850	107100	346400	211100	1240000	347300	462100	328500	331300	333500
Com_600_pos	3-Amino-4-methylpentanoic acid	3-°±»ù-4-¼×»ùÎìËá	C6H13NO2	131.17	1.862	Organic Acid And Its Derivatives	ÓÐ»úËá¼°ÆäÑÜÉúÎï	"5699-54-7"	50560	46340	69830	63610	76620	36550	39650	35430	70040	51580	44490	55060
Com_601_pos	L-Lysine	L-Àµ°±Ëá	C6H14N2O2	146.19	0.74	Amino Acid And Its Derivatives	°±»ùËá¼°ÆäÑÜÉúÎï	"56-87-1"	91430000	71410000	91920000	75570000	96710000	112900000	89610000	133300000	118000000	101300000	96210000	94350000
Com_602_pos	Cocamidopropyl Betaine	Ò¬ÓÍõ£°·±û»ùÌð²Ë¼î	C19H38N2O3	342.5	9.91	Amino Acid And Its Derivatives	°±»ùËá¼°ÆäÑÜÉúÎï	"86438-79-1"	232800	236000	258200	274000	237200	227700	266800	301700	237300	322400	349700	329900
Com_603_pos	Thiamine	Áò°·ËØ	C12H17N4OS+	265.35	0.81	Vitamins	Î¬ÉúËØ	"70-16-6"	5660	7372	8605	5877	5960	4883	6843	18520	21550	11760	8719	15480
Com_604_pos	Vitamin U	Î¬ÉúËØU	C6H14ClNO2S	199.7	0.75	Vitamins	Î¬ÉúËØ	"3493-12-7"	36390	91270	113252	130900	68050	53100	103500	157900	81660	153700	155500	117800
Com_605_pos	Acetylcholine	ÒÒõ£µ¨¼î	C7H16INO2	146.207	1.02	Cholines	µ¨¼îÀà	"51-84-3"	27870000	10770000	14310000	16230000	7184000	9705000	15350000	10240000	8462000	19250000	18050000	13260000
Com_606_pos	Metformin	¶þ¼×Ë«ëÒ	C4H11N5	129.165	0.68	Others	ÆäËü	"657-24-9"	760300	970200	910100	850400	839700	781400	788700	677900	687200	701300	755500	721600
Com_607_pos	dGMP	2'-ÍÑÑõ-5'-ÄñÜÕËá	C10H14N5O7P	347.221	1.04	Nucleotide And Its Derivates	ºËÜÕËá¼°ÆäÑÜÉúÎï	"902-04-5"	15050	85170	63650	6773	47730	79440	16610	16770	9302	32700	43670	29370
Com_608_pos	S-Adenosyl-L-homocysteine	S-(5'-ÏÙÜÕ)-L-¸ß°ëë×°±Ëá	C14H20N6O5S	384.411	1.84	Amino Acid And Its Derivatives	°±»ùËá¼°ÆäÑÜÉúÎï	"979-92-0"	1300000	1231000	688400	1319000	1572000	1341000	1100000	1527000	977400	1227000	1295000	1229000
Com_609_pos	thiamine phosphate	Á×ËáÁò°·ËØ	C12H18ClN4O4PS	380.787	0.84	Pyrimidines and pyrimidine derivatives	à×à¤¼°ÆäÑÜÉúÎï	"532-40-1"	86940	78940	77540	91320	91960	61250	82630	143100	167500	116600	101700	60370
Com_610_pos	L-arginino-succinate	L-¾«°±Ëá-çúçêËá	C10H18N4O6	290.273	2.3	Amino Acid And Its Derivatives	°±»ùËá¼°ÆäÑÜÉúÎï		53030	45490	52510	44930	52690	59380	53840	65110	42570	50450	56650	56700
Com_611_pos	L-Normetanephrine	¼×Ñõ»ùÈ¥¼×ÉöÉÏÏÙËØ	C9H13NO3	183.204	4.06	Hormones	¼¤ËØ	"97-31-4"	249200	127800	150500	180500	186200	160200	179300	105100	220300	201200	138300	148400
Com_612_pos	Cystine	DL-ë×°±Ëá	C6H12N2O4S2	240.301	0.84	Amino Acid And Its Derivatives	°±»ùËá¼°ÆäÑÜÉúÎï	"923-32-0"	3723000	3791000	2809000	3310000	3164000	3584000	2714000	2382000	3032000	3113000	3093000	3078000
Com_613_pos	D-Homocysteine	D-¸ß°ëë×°±Ëá	C4H9NO2S	135.185	1.86	Amino Acid And Its Derivatives	°±»ùËá¼°ÆäÑÜÉúÎï	"454-28-4"	216900	118100	134300	179100	248700	145600	181000	191500	230600	162800	200600	183600
Com_614_pos	Dimethyl fumarate	¸»ÂíËá¶þ¼×õ¥	C6H8O4	144.125	0.9	Fatty Acyls	Ö¬·¾õ£Àà	"624-49-7"	468000	689200	389300	503500	659300	523100	739000	494300	383800	466000	516800	493100
Com_615_pos	Adipic Acid	¼º¶þËá	C6H10O4	146.14	0.84	Fatty Acyls	Ö¬·¾õ£Àà	"124-04-9"	2886000	2197000	3054000	2403000	3025000	3701000	2768000	4294000	3921000	3259000	3216000	3190000
Com_616_pos	Maleic Acid	ÂíÀ´Ëá	C4H4O4	116.07	0.94	Organic Acid And Its Derivatives	ÓÐ»úËá¼°ÆäÑÜÉúÎï	"110-16-7"	2848000	1640000	2055000	3218000	3459000	2936000	3222000	3837000	3102000	2982000	2796000	2687000
Com_617_pos	Pipecolinic Acid	D-ßßà¤Ëá	C6H11NO2	129.16	0.85	Amino Acid And Its Derivatives	°±»ùËá¼°ÆäÑÜÉúÎï	"1723-00-8"	1218000	1074000	1112000	1206000	1064000	1237000	893400	1528000	1373000	1169000	1157000	1057000
Com_618_pos	Isonicotinamide	ÒìÑÌõ£°·	C6H6N2O	122.12	1.51	Pyridine And Its Derivatives	ßÁà¤¼°ÆäÑÜÉúÎï	"1453-82-3"	36240000	55460000	39520000	32330000	77810000	45850000	56250000	54790000	56950000	50930000	49030000	46750000
Com_619_pos	2,6-Diaminooimelic Acid	2,6-¶þ°±»ù¸ý¶þËá	C7H14N2O4	190.2	0.94	Amino Acid And Its Derivatives	°±»ùËá¼°ÆäÑÜÉúÎï	"583-93-7"	77910	71940	75610	83100	46880	56890	80460	82170	56640	74310	60150	79490
Com_620_pos	1,3-Diaminopropane	1,3-¶þ°±»ù±ûÍé	C3H10N2	74.13	0.65	Amines	°·Àà	"109-76-2"	35040	18900	21290	23190	18040	8578	23860	33370	24560	23890	37210	17980
Com_621_pos	trans-Cinnamic acid	·´Ê½Èâ¹ðËá	C9H8O2	148.16	4.07	Cinnamic acids and derivatives	Èâ¹ðËá¼°ÆäÑÜÉúÎï	"140-10-3"	166000	94740	122800	148900	163700	137300	131700	106300	161300	132600	126800	119700
Com_622_pos	Pyrrole-2-carboxylate	ßÁ¿©-2-ôÈËá	C5H5NO2	111.1	1.01	Organoheterocyclic compounds	ÓÐ»úÔÓ»·»¯ºÏÎï	"634-97-9"	162800	383000	448700	129900	564900	323900	446000	306200	549600	442200	333300	345000
Com_623_pos	Oxypurinol	ôÇ»ùàÑßÊ	C5H4N4O2	152.11	1.68	Nucleotide And Its Derivates	ºËÜÕËá¼°ÆäÑÜÉúÎï	"2465-59-0"	629300	347400	654200	289000	467300	287500	500600	356400	773400	406000	476400	509700
Com_624_pos	PAF C-16	¦¢-ÒÒõ£»ù-¦£-O-Ê®ÁùÍé»ù-L-¦¡-ÂÑÁ×Ö¬	C26H54NO7P	523.683	13.8	Phospholipid	Á×Ö¬	"74389-68-7"	115300	49640	129600	90160	138900	65390	55050	110300	89860	79240	32390	58900
Com_625_pos	N7-Methylguanosine	7-¼×»ùÄñÜÕ	C11H17N5O5	298.28	4.15	Nucleotide And Its Derivates	ºËÜÕËá¼°ÆäÑÜÉúÎï	"20244-86-4"	412000	276800	271700	256700	364300	298000	275600	249200	344800	302000	289200	290700
Com_626_pos	7-Methylguanine	7-¼×»ùÄñàÑßÊ	C6H7N5O	165.153	4.09	Nucleotide And Its Derivates	ºËÜÕËá¼°ÆäÑÜÉúÎï	"578-76-7"	56220000	29500000	31750000	43050000	50460000	40850000	47180000	31910000	51080000	40780000	39530000	38540000
Com_627_pos	7-Ketocholesterol	7-Íªµ¨¹Ì´¼	C27H44O2	400.637	16.92	Hormones	¼¤ËØ	"566-28-9"	120300	92160	181400	157900	107100	145500	108300	158700	111500	116400	122100	122200
Com_628_pos	Propionyl-L-carnitine	±ûõ£Èâ¼î	C10H19NO4	217.26	2.57	Carnitine	Èâ¼îÀà	"17298-37-2"	592600	715700	940400	407800	558800	888900	1133000	743800	540100	718400	680500	715600
Com_629_pos	Punicic Acid	Ê¯ÁñËá	C18H30O2	278.43	12.7	Fatty Acyls	Ö¬·¾õ£Àà	"544-72-9"	150800	124700	224100	167100	264400	109400	254300	332200	277600	233400	246400	201100
Com_630_pos	Pro-Leu	¸¬°±Ëá-ÁÁ°±Ëá	C11H20N2O3	228.288	1.72	Amino Acid And Its Derivatives	°±»ùËá¼°ÆäÑÜÉúÎï	"52899-07-7"	12160000	10690000	7423000	15380000	15070000	9342000	6397000	5551000	11640000	17390000	13830000	16890000
Com_631_pos	Propionylcholine	±ûõ£µ¨¼î	C8H18NO2+	160.234	1.03	Cholines	µ¨¼îÀà	"5072-54-8"	711600	497100	897600	635000	612700	1019000	798900	993200	708800	792200	872200	645500
Com_632_pos	p-Mentha-1,3,8-triene	¶Ô-±¡ºÉ-1,3,8-ÈýÏ©	C10H14	134.218	11.37	Fatty Acyls	Ö¬·¾õ£Àà	"18368-95-1"	1445000	1328000	1336000	1349000	1385000	1008000	1500000	1497000	1546000	1430000	1436000	1282000
Com_633_pos	Porphobilinogen	µ¨É«ËØÔ­	C10H14N2O4	226.229	4.9	Organic nitrogen compounds	ÓÐ»úµª»¯ºÏÎï	"487-90-1"	227100	128300	157000	230000	249400	187500	241000	199600	246700	202000	200100	189400
Com_634_pos	4-Aminobenzoate	¶Ô-°±»ù±½¼×Ëá	C7H7NO2	137.136	2.74	Benzoic Acid And Its Derivatives	±½¼×Ëá¼°ÆäÑÜÉúÎï	"150-13-0"	4104000	5869000	2818000	1225000	6303000	5855000	6284000	9494000	4858000	4908000	4981000	5032000
Com_635_pos	Picolinamide	ßÁà¤õ£°·	C6H6N2O	122.125	1.51	Pyridine And Its Derivatives	ßÁà¤¼°ÆäÑÜÉúÎï	"1452-77-3"	35270000	49200000	34160000	28210000	66930000	42170000	48490000	47790000	49060000	43410000	42130000	39780000
Com_636_pos	5-Methyl-2'-deoxycytidine	5-¼×»ù-2'-ÍÑÑõ°ûÜÕ	C10H15N3O4	241.24	1.722	Nucleotide And Its Derivates	ºËÜÕËá¼°ÆäÑÜÉúÎï	"838-07-3"	19690	11639	7311	17590	3879	9579	11310	12280	6993	11010	8017	19420
Com_637_pos	Ethyl chrysanthemumate	¾ÕËáÒÒõ¥	C12H20O2	196.29	1.18	Organoheterocyclic compounds	ÓÐ»úÔÓ»·»¯ºÏÎï	"97-41-6"	5643000	4526000	2772000	3230000	7134000	5192000	7758000	7914000	8229000	6259000	5896000	5682000
Com_638_pos	Guggulsterone	¹ÌçÞÍª	C21H28O2	312.446	15.17	Hormones	¼¤ËØ	"95975-55-6"	171800	268700	260300	173700	213500	170300	233200	200100	192600	368700	366500	356800
Com_639_pos	4-Chloro-6-methoxy-2-(methylsulfinyl)pyrimidine	ÄñàÑßÊºËÜÕ	C10H13N5O5	283.241	2.72	Nucleotide And Its Derivates	ºËÜÕËá¼°ÆäÑÜÉúÎï	"85-30-3"	2222000	551200	1063000	288500	1140000	589300	1308000	1567000	1780000	1197000	1116000	1051000
Com_640_pos	Guanine	ÄñàÑßÊ	C5H5N5O	151.126	2.72	Nucleotide And Its Derivates	ºËÜÕËá¼°ÆäÑÜÉúÎï	"73-40-5"	403300	91320	218400	54300	268200	91900	211500	295500	365000	218500	205100	239600
Com_641_pos	Imatinib	ÒÁÂíÌæÄá	C29H31N7O	493.603	11.76	Others	ÆäËü	"152459-95-5"	224000	93800	281100	190700	727900	98330	318000	213000	397900	270900	288300	288800
Com_642_pos	Hydrocortisone 17-butyrate	Çâ»¯¿ÉµÄËÉ¶¡Ëáõ¥	C25H36O6	432.55	10.51	Others	ÆäËü	"13609-67-1"	108400	71800	83240	65200	88680	74580	67350	102300	121200	64940	69630	118800
Com_643_pos	Homoserine	Í¬ÐÍË¿°±Ëá	C4H9NO3	119.119	0.9	Amino Acid And Its Derivatives	°±»ùËá¼°ÆäÑÜÉúÎï	"1927-25-9"	14060000	6147000	8059000	11820000	15750000	13850000	10530000	5555000	13960000	11730000	10840000	11060000
Com_644_pos	Homocysteic acid	Í¬ÐÍ°ëë×°±Ëá	C4H9NO5S	183.18	1.83	Amino Acid And Its Derivatives	°±»ùËá¼°ÆäÑÜÉúÎï	"1001-13-4"	273500	189700	194900	249000	395700	216000	256900	321000	291000	247300	206100	267700
Com_645_pos	glutathione disulfide	L-¹Èë×¸ÊëÄ	C20H32N6O12S2	612.631	1.81	Amino Acid And Its Derivatives	°±»ùËá¼°ÆäÑÜÉúÎï	"27025-41-8"	501500	572100	594300	964500	1700000	283700	370600	698600	492600	716500	704100	776800
Com_646_pos	Phe-Pro	L-±½±û°±õ£-L-¸¬°±Ëá	C14H18N2O3	262.304	5.58	Amino Acid And Its Derivatives	°±»ùËá¼°ÆäÑÜÉúÎï	"7669-65-0"	102500	81390	87000	95380	91330	168000	249000	216500	289100	150300	145400	149300
Com_647_pos	Phe-Phe	L-±½±û°±Ëá-L-±½±û°±Ëá	C18H20N2O3	312.363	6.51	Amino Acid And Its Derivatives	°±»ùËá¼°ÆäÑÜÉúÎï	"2577-40-4"	35470	60540	32080	35500	82300	34890	92060	39130	55250	52600	45310	53450
Com_648_pos	alpha-Nicotinamide adenine dinucleotide	¦Á-ÑÌõ£°·ÏÙàÑßÊ¶þºËÜÕËá	C21H27N7O14P2	663.425	1.04	Nucleotide And Its Derivates	ºËÜÕËá¼°ÆäÑÜÉúÎï	"7298-93-3"	39070000	34000000	30590000	39110000	35040000	35840000	32530000	28810000	33580000	44580000	33560000	27240000
Com_649_pos	trans-3-Hydroxy-L-proline	·´-3-ôÇ»ù-L-¸¬°±Ëá	C5H9NO3	131.13	2.14	Amino Acid And Its Derivatives	°±»ùËá¼°ÆäÑÜÉúÎï	"4298-08-2"	5143000	2355000	2673000	4198000	5627000	3897000	4308000	2061000	5855000	3824000	3712000	3660000
Com_650_pos	4-Acetamidobutanoate	4-ÒÒõ£°±»ù¶¡Ëá	C6H11NO3	145.156	1.03	Organic Acid And Its Derivatives	ÓÐ»úËá¼°ÆäÑÜÉúÎï	"3025-96-5"	333700	188700	230200	222500	58280	87760	38020	39140	42780	127500	158800	104900
Com_651_pos	Val-Ser	çÓ°±õ£-Ë¿°±Ëá	C8H16N2O4	204.224	1.01	Amino Acid And Its Derivatives	°±»ùËá¼°ÆäÑÜÉúÎï	"13588-94-8"	121300	74670	73930	71990	96500	65000	198800	125900	243300	128400	109600	103400
Com_652_pos	L-Alanine	L-±û°±Ëá	C3H7NO2	89.09	0.86	Amino Acid And Its Derivatives	°±»ùËá¼°ÆäÑÜÉúÎï	"56-41-7"	18530000	14880000	18620000	22430000	18740000	19060000	18440000	18470000	20440000	21750000	19750000	18670000
Com_653_pos	L-Aspartic acid	L-Ìì¶¬°±Ëá	C4H7NO4	133.1	0.86	Amino Acid And Its Derivatives	°±»ùËá¼°ÆäÑÜÉúÎï	"56-84-8"	5596000	5284000	7098000	5819000	7151000	9074000	5850000	6438000	10240000	7801000	7349000	7420000
Com_654_pos	beta-Nicotinamide mononucleotide	¦Â-ÑÌõ£°·µ¥ºËÜÕËá	C11H15N2O8P	334.219	0.993	Nucleotide And Its Derivates	ºËÜÕËá¼°ÆäÑÜÉúÎï	"1094-61-7"	364100	567800	507300	250300	912500	363900	872200	693800	1049000	508200	563700	535900
Com_655_pos	Creatine	¼¡Ëá	C4H9N3O2	131.133	0.94	Organic Acid And Its Derivatives	ÓÐ»úËá¼°ÆäÑÜÉúÎï	"57-00-1"	330500000	332400000	299900000	331900000	327700000	289900000	329000000	287700000	313300000	325500000	319700000	315900000
Com_656_pos	Choline Glycerophosphate	¸ÊÓÍÁ×Ö¬µ¨¼î	C8H20NO6P	257.22	0.89	Cholines	µ¨¼îÀà	"28319-77-9"	14390000	11810000	19890000	23200000	22790000	8393000	14160000	6951000	9862000	16010000	15550000	13090000
Com_657_pos	DL-Citrulline	DL-¹Ï°±Ëá	C6H13N3O3	175.19	0.9	Amino Acid And Its Derivatives	°±»ùËá¼°ÆäÑÜÉúÎï	"627-77-0"	1062000	925300	826100	1101000	1153000	1187000	1166000	1963000	1138000	1133000	1135000	1165000
Com_658_pos	4-Aminobutyric acid	¦Ã-°±»ù¶¡Ëá	C4H9NO2	103.12	0.864	Organic Acid And Its Derivatives	ÓÐ»úËá¼°ÆäÑÜÉúÎï	"56-12-2"	323600	197300	309600	341500	278000	209300	294200	392300	397100	311900	327900	283600
Com_659_pos	Glycine	¸Ê°±Ëá	C2H5NO2	75.07	0.88	Amino Acid And Its Derivatives	°±»ùËá¼°ÆäÑÜÉúÎï	"56-40-6 "	438600	194200	317300	526800	281200	345900	408000	414400	577700	492700	442200	401700
Com_660_pos	L-Arginine	¾«°±Ëá	C6H14N4O2	174.2	0.794	Amino Acid And Its Derivatives	°±»ùËá¼°ÆäÑÜÉúÎï	"74-79-3"	4567000	5259000	2862000	8593000	5831000	5499000	8006000	22670000	7954000	7750000	7518000	7334000
Com_661_pos	L-Cysteine	L-°ëë×°±Ëá	C3H7NO2S	121.16	0.88	Amino Acid And Its Derivatives	°±»ùËá¼°ÆäÑÜÉúÎï	"52-90-4"	494600	350100	376300	380600	372300	346000	476200	295800	531900	308400	304400	297500
Com_662_pos	Nicotinate ribonucleoside	ÑÌËáºËÜÕ	C11H13NO6	255.224	1.04	Carbohydrates And Its Derivatives	ÌÇÀà¼°ÆäÑÜÉúÎï	"17720-18-2"	21160	62620	31750	24200	18270	28940	20420	17750	46380	35270	20940	25460
Com_663_pos	S-Methyl-L-cysteine	S-¼×»ù-L-°ëë×°±Ëá	C4H9NO2S	135.185	1.04	Amino Acid And Its Derivatives	°±»ùËá¼°ÆäÑÜÉúÎï	"1187-84-4"	1975000	2226000	1825000	2853000	1587000	1558000	628600	527200	486000	1118000	1272000	1203000
Com_664_pos	MAG (18:2)	µ¥õ£¸ÊÓÍõ¥ (õ£»ù 18:2)	C21H38O4	354.1	14.64	Glycerolipids	¸ÊÓÍÖ¬Àà		8864	14060	4861	8823	16340	10010	10770	11670	13080	7761	9192	7463
Com_665_pos	Tetraethylammonium fluoride dihydrate	°ûà×à¤ºËÜÕ	C8H20FN	149.25	1.04	Nucleotide And Its Derivates	ºËÜÕËá¼°ÆäÑÜÉúÎï	"63123-01-3"	642800	351200	614000	673100	457900	324500	672900	655900	760700	579100	603100	639400
Com_666_pos	Cholesterol	µ¨¹Ì´¼	C27H46O	386.654	11.2	Hormones	¼¤ËØ	"57-88-5"	370300	377900	337100	445100	318900	382500	447000	362200	374300	299300	269700	290900
Com_667_pos	5'-Deoxy-5'-(methylthio)adenosine	5-ÍÑÑõ-5-¼×ÁòÏÙÜÕ	C11H15N5O3S	297.333	4.91	Nucleotide And Its Derivates	ºËÜÕËá¼°ÆäÑÜÉúÎï	"2457-80-9"	715700	765900	603200	787900	885800	641800	730600	615800	681300	1045000	990700	1041000
Com_668_pos	L-Valine	L-çÓ°±Ëá	C5H11NO2	117.146	1.2	Amino Acid And Its Derivatives	°±»ùËá¼°ÆäÑÜÉúÎï	"72-18-4"	2374000	1005000	1261000	2329000	2702000	1710000	1876000	1002000	2559000	1909000	1880000	1672000
Com_669_pos	Hypoxanthine-9-beta-D-Arabinofuranoside	°¢ÌÇ¼¡ÜÕ	C10H12N4O5	268.226	2.58	Nucleotide And Its Derivates	ºËÜÕËá¼°ÆäÑÜÉúÎï	"7013-16-3"	10580000	17860000	7017000	3865000	19280000	15110000	19370000	27750000	15030000	13700000	13460000	14550000
Com_670_pos	4-aminobutyrate	4-°±»ù¶¡Ëáõ¥	C4H9NO2	103.12	0.84	Organic Acid And Its Derivatives	ÓÐ»úËá¼°ÆäÑÜÉúÎï		100800	69950	102600	120900	74390	78300	91740	165700	118400	119100	95200	89970
Com_671_pos	3-Methylhistidine	3-N-¼×»ù-L-×é°±Ëá	C7H13N3O3	169.181	0.76	Amino Acid And Its Derivatives	°±»ùËá¼°ÆäÑÜÉúÎï	"368-16-1"	42910000	40080000	41990000	35870000	34930000	33970000	34620000	25220000	35370000	37830000	35640000	33950000
Com_672_pos	3-OH-anthranilate	3-ôÇ»ù-ÁÚ°±»ù±½¼×Ëáõ¥	C7H7NO3	153.14	1.68	Organic Acid And Its Derivatives	ÓÐ»úËá¼°ÆäÑÜÉúÎï		199000	172700	227200	239300	319000	399100	273200	351900	480400	310100	348900	312900
Com_673_pos	3-Methoxytyramine	3-¼×ÑõÀÒ°·	C9H13NO2	167.205	18.4	Phenols And Its Derivatives	·ÓÀà¼°ÆäÑÜÉúÎï	"554-52-9"	168600	190500	240300	194600	173800	202900	243600	246400	252400	115600	179100	238300
Com_674_pos	3-Nitro-L-Tyrosine	3-Ïõ»ù-L-ÀÒ°±Ëá	C9H10N2O5	226.186	8.98	Amino Acid And Its Derivatives	°±»ùËá¼°ÆäÑÜÉúÎï	"621-44-3"	121100	110600	122800	121700	114100	122600	137400	118100	123300	128700	119800	113600
Com_675_pos	3-amino isobutanoate	3-°±»ùÒì¶¡Ëáõ¥	C4H9NO2	103.12	0.91	Amino Acid And Its Derivatives	°±»ùËá¼°ÆäÑÜÉúÎï		14950	28370	35280	30490	28820	21310	27490	22520	21830	21530	20190	21590
Com_676_pos	3-Guanidinopropanoate	3-ëÒ»ù±ûËá	C4H9N3O2	131.133	0.9	Organic nitrogen compounds	ÓÐ»úµª»¯ºÏÎï	"353-09-3"	10380000	11360000	9323000	9682000	9555000	9514000	9481000	8512000	8990000	9983000	9447000	9623000
Com_677_pos	3,5-Diiodo-L-thyronine	3,5-¶þµâ-L-¼××´ÏÙËØ	C15H13I2NO4	525.077	0.71	Organic Acid And Its Derivatives	ÓÐ»úËá¼°ÆäÑÜÉúÎï	"1041-01-6"	25840	21730	12910	33500	26410	31150	45110	30270	31520	28140	31250	25350
Com_678_pos	3'-Adenylic acid	ÏÙÜÕ-3'-Á×Ëá	C10H14N5O7P	347.221	5.13	Nucleotide And Its Derivates	ºËÜÕËá¼°ÆäÑÜÉúÎï	"84-21-9"	576000	540300	397000	647100	537200	287900	485100	407500	444500	394800	421700	412100
