# Supplementary material for: Association analysis of transcriptome and quasi-targeted metabolomics reveals the regulation mechanism underlying broiler muscle tissue development at different levels of dietary guanidinoacetic acid
Source: Frontiers journal article supplement (doi:10.3389/fvets.2024.1384028), 2024-04-25
Supplement: Data_Sheet_1.ZIP [file No_GAA.vs.Control_all_corr.xls]

corr	1D-chiro-Inositol	5-Hydroxyhexanoic Acid	Glutaric Acid	Taurohyodeoxycholic acid sodium salt	Cytidine-5-Triphosphate	Stachydrine	Isoquinoline	Ectoine	8,15-Dihete	Trigonelline	Phosphonotyrosine
1D-chiro-Inositol	1	0.95811623742814	-0.819155501060598	-0.759122270778618	0.850023500031224	-0.895399246610724	0.785518046774599	-0.726663737264703	0.728630122536652	-0.83048464951299	-0.858398353602685
5-Hydroxyhexanoic Acid	0.95811623742814	1	-0.723866113107684	-0.716876818611118	0.682233105279061	-0.790082009164907	0.715457686981108	-0.576786345158544	0.770593193471225	-0.698699275125588	-0.910618747292659
Glutaric Acid	-0.819155501060598	-0.723866113107684	1	0.972494530960752	-0.816843326340994	0.893872974397528	-0.753585684270298	0.885302007001131	-0.74168641035171	0.881942319823119	0.66509841476687
Taurohyodeoxycholic acid sodium salt	-0.759122270778618	-0.716876818611118	0.972494530960752	1	-0.710615323366558	0.811547016435974	-0.676586759759092	0.784508475435946	-0.738346345491598	0.798705993308004	0.683665183157078
Cytidine-5-Triphosphate	0.850023500031224	0.682233105279061	-0.816843326340994	-0.710615323366558	1	-0.870180782199508	0.699189716529502	-0.739800596210408	0.394799386665878	-0.892859067423727	-0.640674055279718
Stachydrine	-0.895399246610724	-0.790082009164907	0.893872974397528	0.811547016435974	-0.870180782199508	1	-0.949096999901661	0.779596804709274	-0.734616706223168	0.984092949683619	0.809649159242371
Isoquinoline	0.785518046774599	0.715457686981108	-0.753585684270298	-0.676586759759092	0.699189716529502	-0.949096999901661	1	-0.622653933762611	0.752296923638654	-0.927250856778713	-0.814166126429878
Ectoine	-0.726663737264703	-0.576786345158544	0.885302007001131	0.784508475435946	-0.739800596210408	0.779596804709274	-0.622653933762611	1	-0.705433087804304	0.739573601267646	0.377247619181139
8,15-Dihete	0.728630122536652	0.770593193471225	-0.74168641035171	-0.738346345491598	0.394799386665878	-0.734616706223168	0.752296923638654	-0.705433087804304	1	-0.624682376902437	-0.675870195726962
Trigonelline	-0.83048464951299	-0.698699275125588	0.881942319823119	0.798705993308004	-0.892859067423727	0.984092949683619	-0.927250856778713	0.739573601267646	-0.624682376902437	1	0.764730442961525
Phosphonotyrosine	-0.858398353602685	-0.910618747292659	0.66509841476687	0.683665183157078	-0.640674055279718	0.809649159242371	-0.814166126429878	0.377247619181139	-0.675870195726962	0.764730442961525	1
