# Supplementary material for: Association analysis of transcriptome and quasi-targeted metabolomics reveals the regulation mechanism underlying broiler muscle tissue development at different levels of dietary guanidinoacetic acid
Source: Frontiers journal article supplement (doi:10.3389/fvets.2024.1384028), 2024-04-25
Supplement: Data_Sheet_1.ZIP [file No_GAA.vs.Control_all_Diff.xls]

Compound_ID	Name	Chinese name	RT [min]	Formula	Molecular Weight	Class(English)	Class(Chinese)	CAS	all_No_GAA_1	all_No_GAA_2	all_No_GAA_3	all_NC_1	all_NC_2	all_NC_3	FC	log2FC	Pvalue	ROC	VIP	Up.Down
Com_371_pos	1D-chiro-Inositol	D-ÊÖÐÔ¼¡´¼	18.32	C6H12O6	180.156	Phenols And Its Derivatives	·ÓÀà¼°ÆäÑÜÉúÎï	"643-12-9"	1356000	1391000	1478000	1122000	1016000	1044000	1.32778126964173	0.409017505726	0.00207841816295289	1	2.18046434644233	up
Com_222_neg	5-Hydroxyhexanoic Acid	5-ôÇ»ù¼ºËá	6.36	C6H12O3	132.16	Fatty Acyls	Ö¬·¾õ£Àà	"185956-02-9"	98100	84620	105200	71490	52720	54160	1.61417278690363	0.690795018186	0.0190715969525421	1	2.45289318729734	up
Com_263_neg	Glutaric Acid	Îì¶þËá	0.7	C5H8O4	132.115	Organic Acid And Its Derivatives	ÓÐ»úËá¼°ÆäÑÜÉúÎï	"110-94-1"	1533000	1537000	1614000	2824000	2192000	2437000	0.628471756339729	-0.67008018382	0.0203097019932671	1	2.06553500277018	down
Com_277_neg	Taurohyodeoxycholic acid sodium salt	Å£»ÇÖíÍÑÑõµ¨ËáÄÆÑÎ	8.928	C26H44NNaO6S	521.69	Bile Acids	µ¨Ö­Ëá	"110026-03-4"	8097	17060	13940	46600	25950	39070	0.350268769037807	-1.51346573582	0.021570408226612	1	2.34571850692265	down
Com_560_pos	Cytidine-5-Triphosphate	°ûÜÕ-5-ÈýÁ×Ëá	1.79	C9H16N3O14P3	483.16	Nucleotide And Its Derivates	ºËÜÕËá¼°ÆäÑÜÉúÎï	"36051-68-0"	5607	11480	10079	2768	4407	2350	2.85207349081365	1.51201115691	0.0239823689408152	1	2.20472157513047	up
Com_582_pos	Stachydrine	Ë®ËÕ¼î	0.97	C7H13NO2	143.18	Amino Acid And Its Derivatives	°±»ùËá¼°ÆäÑÜÉúÎï	"471-87-4"	2174000	1933000	2292000	2822000	2834000	2873000	0.750263805838903	-0.414530133337	0.027708884049876	1	2.19017014596707	down
Com_334_pos	Isoquinoline	Òìà­ßø	4.9	C9H7N	129.16	Organoheterocyclic compounds	ÓÐ»úÔÓ»·»¯ºÏÎï	"119-65-3"	31230	33530	24430	21860	18110	18790	1.51786929884275	0.602047568073	0.0299472187710495	1	2.28912501951487	up
Com_319_pos	Ectoine	ÒÀ¿Ë¶àÒò	0.95	C6H10N2O2	142.156	Others	ÆäËü	"96702-03-3"	909700	625000	724500	2340000	1726000	1161000	0.432217333078248	-1.21017116558	0.037588009237071	1	1.77416143167326	down
Com_227_neg	8,15-Dihete	8,15-¶þôÇ»ù¶þÊ®Ì¼ËÄÏ©Ëá	7.14	C20H32O4	336.466	Eicosanoid	Ñõ»¯Ö¬ÖÊ	"80234-65-7"	5927	4436	4565	3292	2903	3935	1.47364264560711	0.559386717163	0.0388210658530257	1	2.16926679602235	up
Com_537_pos	Trigonelline	ºùÂ«°Í¼î	0.94	C7H7NO2	137.14	Alkaloids and derivatives	ÉúÎï¼î¼°ÆäÑÜÉúÎï	"535-83-1"	515500	429400	540800	654400	627800	673400	0.759715688279812	-0.396468481397	0.0485863447528354	1	1.57815129321709	down
Com_36_neg	Phosphonotyrosine	O-Á×ËáÀÒ°±Ëá	0.94	C9H12NO6P	261.168	Amino Acid And Its Derivatives	°±»ùËá¼°ÆäÑÜÉúÎï	"21820-51-9"	88470	98940	96940	109900	128000	144200	0.744176917037425	-0.426282453405	0.0491722656540349	1	1.92279273016155	down
