# Supplementary material for: Association analysis of transcriptome and quasi-targeted metabolomics reveals the regulation mechanism underlying broiler muscle tissue development at different levels of dietary guanidinoacetic acid
Source: Frontiers journal article supplement (doi:10.3389/fvets.2024.1384028), 2024-04-25
Supplement: Data_Sheet_1.ZIP [file No_GAA.vs.Control_all_kegg_enrichment.xls]

MapID	MapTitle	Pvalue	x	y	n	N	EnrichDirect	MetaIDs	kegg_cpd_id
map00071	Fatty acid degradation	0.0272560372828696	1	2	4	292	Over	Glutaric Acid	cpd:C00489
map00562	Inositol phosphate metabolism	0.067090643440155	1	5	4	292	Over	1D-chiro-Inositol	cpd:C19891
map00760	Nicotinate and nicotinamide metabolism	0.155275445409748	1	12	4	292	Over	Trigonelline	cpd:C01004
map00310	Lysine degradation	0.167342939046752	1	13	4	292	Over	Glutaric Acid	cpd:C00489
map00260	Glycine, serine and threonine metabolism	0.237055537874832	1	19	4	292	Over	Ectoine	cpd:C06231
