# Supplementary material for: Association analysis of transcriptome and quasi-targeted metabolomics reveals the regulation mechanism underlying broiler muscle tissue development at different levels of dietary guanidinoacetic acid
Source: Frontiers journal article supplement (doi:10.3389/fvets.2024.1384028), 2024-04-25
Supplement: Data_Sheet_1.ZIP [file No_GAA.vs.Control_all_Pvalue.xls]

Pvalue	1D-chiro-Inositol	5-Hydroxyhexanoic Acid	Glutaric Acid	Taurohyodeoxycholic acid sodium salt	Cytidine-5-Triphosphate	Stachydrine	Isoquinoline	Ectoine	8,15-Dihete	Trigonelline	Phosphonotyrosine
1D-chiro-Inositol	0	0.00259463706458226	0.0460998636871872	0.0800450071623505	0.0320527188161303	0.0158397413818883	0.0640704084767044	0.101858221978798	0.100470358197233	0.0406676307936942	0.0286569102282874
5-Hydroxyhexanoic Acid	0.00259463706458226	0	0.103847291361084	0.108890705606111	0.135420315965315	0.0614732671023644	0.109927603281133	0.230763840426923	0.0729046729308234	0.122496829908046	0.0116264787168407
Glutaric Acid	0.0460998636871872	0.103847291361084	0	0.00112442159792823	0.0472474301525235	0.0162967668887678	0.0835988820215714	0.018978982241191	0.0914707611510486	0.0200837024759702	0.149457482216843
Taurohyodeoxycholic acid sodium salt	0.0800450071623505	0.108890705606111	0.00112442159792823	0	0.113498195063604	0.0499253812334304	0.139980300260908	0.0646515491797368	0.0937372030646706	0.0567007718742839	0.134274123159301
Cytidine-5-Triphosphate	0.0320527188161303	0.135420315965315	0.0472474301525235	0.113498195063604	0	0.0241856204241794	0.122120555976199	0.0927473595433302	0.438568930299544	0.0166038241551225	0.17047549297391
Stachydrine	0.0158397413818883	0.0614732671023644	0.0162967668887678	0.0499253812334304	0.0241856204241794	0	0.00382072535430283	0.0675130270837372	0.0962971927890254	0.000377538860380406	0.0509016307366537
Isoquinoline	0.0640704084767044	0.109927603281133	0.0835988820215714	0.139980300260908	0.122120555976199	0.00382072535430283	0	0.186719917238823	0.0844360852617319	0.00774614659996177	0.0485925281165194
Ectoine	0.101858221978798	0.230763840426923	0.018978982241191	0.0646515491797368	0.0927473595433302	0.0675130270837372	0.186719917238823	0	0.117374762383098	0.0929015559566378	0.460972713209557
8,15-Dihete	0.100470358197233	0.0729046729308234	0.0914707611510486	0.0937372030646706	0.438568930299544	0.0962971927890254	0.0844360852617319	0.117374762383098	0	0.184860734425749	0.140563635337287
Trigonelline	0.0406676307936942	0.122496829908046	0.0200837024759702	0.0567007718742839	0.0166038241551225	0.000377538860380406	0.00774614659996177	0.0929015559566378	0.184860734425749	0	0.0765163541496512
Phosphonotyrosine	0.0286569102282874	0.0116264787168407	0.149457482216843	0.134274123159301	0.17047549297391	0.0509016307366537	0.0485925281165194	0.460972713209557	0.140563635337287	0.0765163541496512	0
