# Supplementary material for: Association analysis of transcriptome and quasi-targeted metabolomics reveals the regulation mechanism underlying broiler muscle tissue development at different levels of dietary guanidinoacetic acid
Source: Frontiers journal article supplement (doi:10.3389/fvets.2024.1384028), 2024-04-25
Supplement: Data_Sheet_1.ZIP [file No_GAA.vs.Control_all_zscore.xls]

Compound_ID	all_No_GAA_1	all_No_GAA_2	all_No_GAA_3	all_NC_1	all_NC_2	all_NC_3
1D-chiro-Inositol	5.37651450606318	6.01368608973884	7.59751259773262	1.11656734663163	-0.81315230678608	-0.303415039845553
5-Hydroxyhexanoic Acid	3.69933727199886	2.40889304462343	4.37902228790135	1.15195441662347	-0.644903012741283	-0.507051403882187
Glutaric Acid	-2.98553368773929	-2.97298063789596	-2.7313344284118	1.06596314919633	-0.91741872605023	-0.148544423146104
Taurohyodeoxycholic acid sodium salt	-2.78552305850748	-1.92784772133189	-2.22640256368242	0.898854215538263	-1.07715780194206	0.178303586403793
Cytidine-5-Triphosphate	2.23689619431893	7.63874296620836	6.35013623584618	-0.374348993045973	1.13316451949051	-0.758815526444539
Stachydrine	-25.0894601906503	-34.1276663280894	-20.664114447008	-0.787561530648217	-0.337526370277807	1.12508790092602
Isoquinoline	5.82776472772472	6.97896932610149	2.42420330643688	1.13785729868544	-0.739106720407115	-0.398750578278331
Ectoine	-1.41203348144303	-1.89484616269548	-1.72610762463922	1.01356180480698	-0.0276991235000233	-0.985862681306958
8,15-Dihete	4.89334926823221	2.03255312696928	2.28006667641456	-0.162450753382692	-0.908828821089788	1.07127957447248
Trigonelline	-5.9534951826994	-9.71244850875967	-4.84894792196392	0.110600252721868	-1.05070240085773	0.940102148135864
Phosphonotyrosine	-2.26686821211292	-1.65668455847965	-1.77324304054904	-1.01794407673937	0.036910185988641	0.981033890750729
