# Supplementary material for: Association analysis of transcriptome and quasi-targeted metabolomics reveals the regulation mechanism underlying broiler muscle tissue development at different levels of dietary guanidinoacetic acid
Source: Frontiers journal article supplement (doi:10.3389/fvets.2024.1384028), 2024-04-25
Supplement: Data_Sheet_1.ZIP [file sam_qc_infor_all.xls]

Sample name	batch	Group name	ID num
all_NC_1	1	Control	1
all_NC_2	1	Control	2
all_NC_3	1	Control	3
all_No_GAA_1	1	No_GAA	4
all_No_GAA_2	1	No_GAA	5
all_No_GAA_3	1	No_GAA	6
all_High_GAA_1	1	High_GAA	7
all_High_GAA_2	1	High_GAA	8
all_High_GAA_3	1	High_GAA	9
all_QC1	1	QC	10
all_QC2	1	QC	11
all_QC3	1	QC	12
