# Supplementary material for: Association analysis of transcriptome and quasi-targeted metabolomics reveals the regulation mechanism underlying broiler muscle tissue development at different levels of dietary guanidinoacetic acid
Source: Front Vet Sci. 2024 Apr 25;11:1384028. doi: 10.3389/fvets.2024.1384028 (PMC11080945; doi:10.3389/fvets.2024.1384028)
Supplement: Supplementary file 1 [file Data_Sheet_1.docx]

Supplementary Material

Association analysis of transcriptome and quasi-targeted metabolomics reveals the regulation mechanism underlying broiler muscle tissue development at different levels of dietary guanidinoacetic acid

**Jieyun Hong1, †, Sayed Haidar Abbas Raza3, †, Mengqian Liu1, Mengyuan Li1, Jinrui Ruan1, Junjing Jia1,2,*, Changrong Ge1,2,* and Weina Cao1,2,***

1College of Animal Science and Technology, Yunnan Agricultural University, Kunming 650201, China

2Yunnan Provincial Key Laboratory of Animal Nutrition and Feed, Yunnan Agricultural University, Kunming 650201, China

3Guangdong Provincial Key Laboratory of Food Quality and Safety / Nation-Local Joint Engineering Research Center for Machining and Safety of Livestock and Poultry Products, South China Agricultural University, Guangzhou 510642, China

* Author to whom correspondence should be addressed.

† These authors contributed equally to this work.

*** Correspondence:** Weina Cao: [849989054@qq.com](mailto:849989054@qq.com)

# Supplementary Data

The raw data of transcriptome presented in the study are deposited in the Sequence Read Archive repository, accession number PRJNA1089708.

The raw result of quasi-targeted metabolomics analysis has been provided as supplementary materials in a zip file. Please download the file “Result-X101SC22030966-Z01-J001-B1-42 (quasi-targeted metabolomics).ZIP”.

# Supplementary Figures and Tables

## Supplementary Figures (1-10)


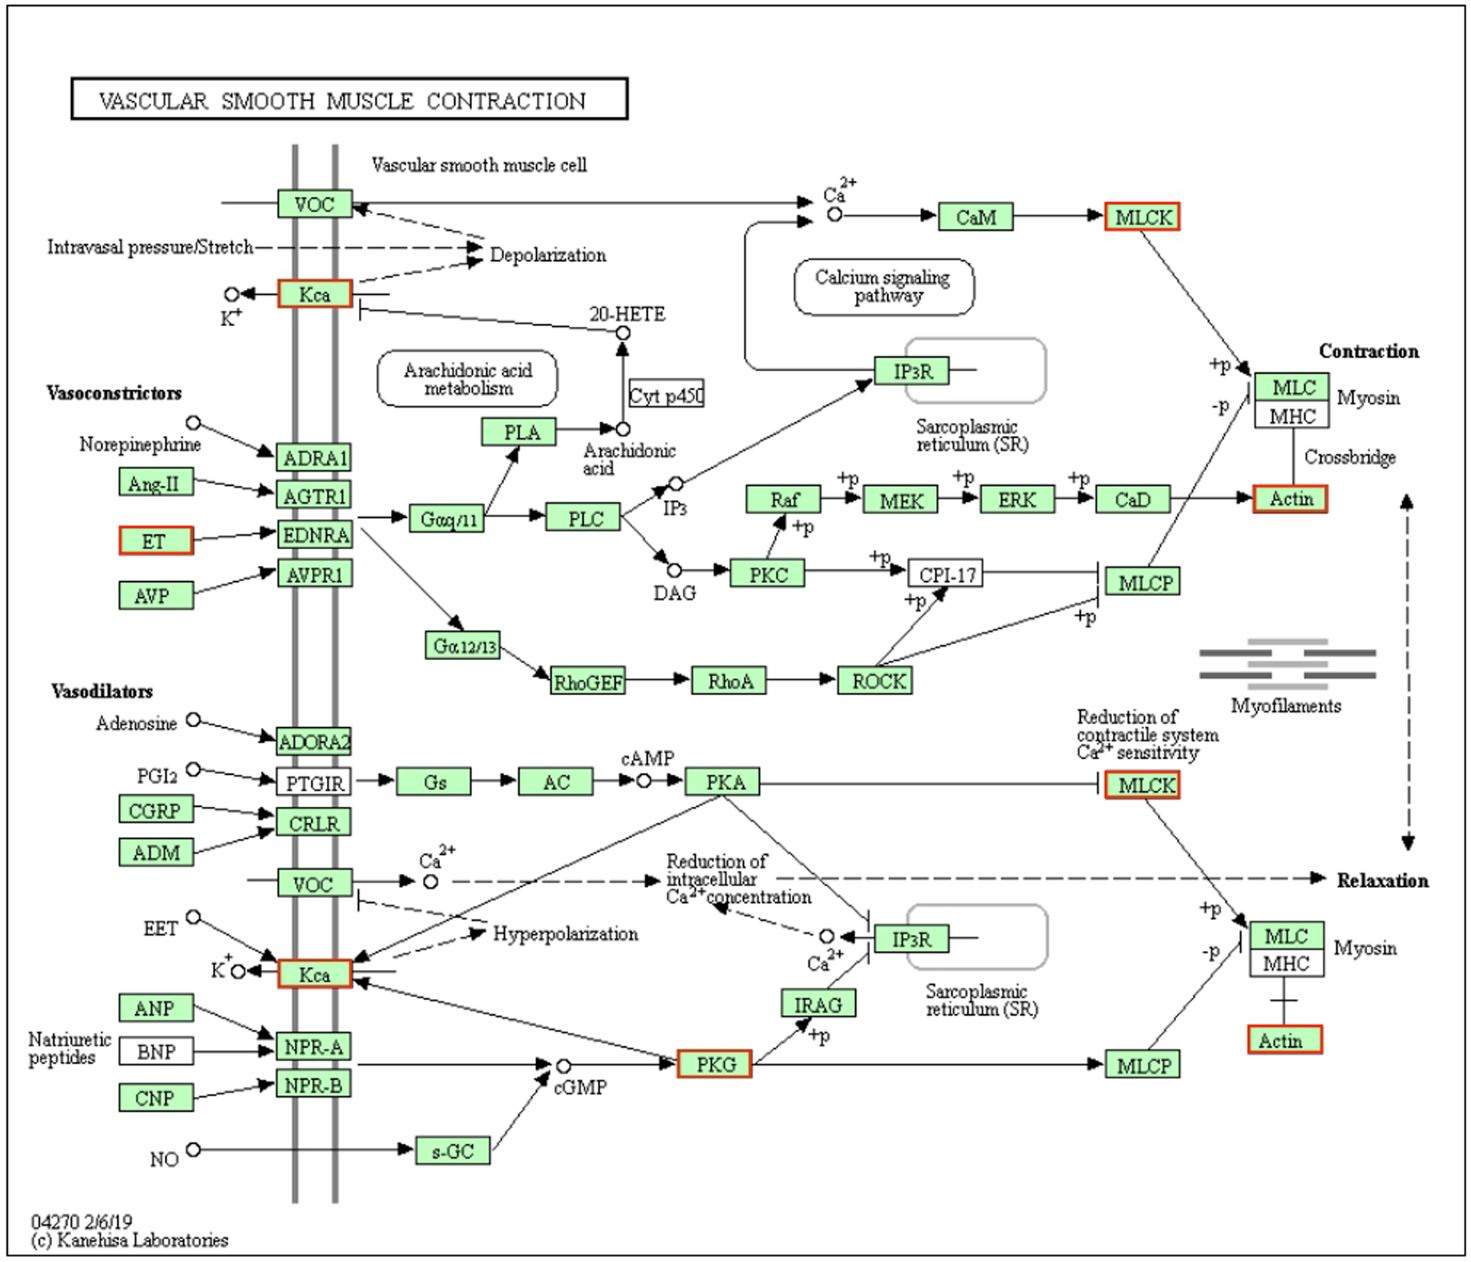


**Supplementary Figure 1.** KEGG enrichment pathway map of the expression regulation of core DEGs in vascular smooth muscle contraction pathway for Normal GAA group vs control group in RNA-seq analysis.


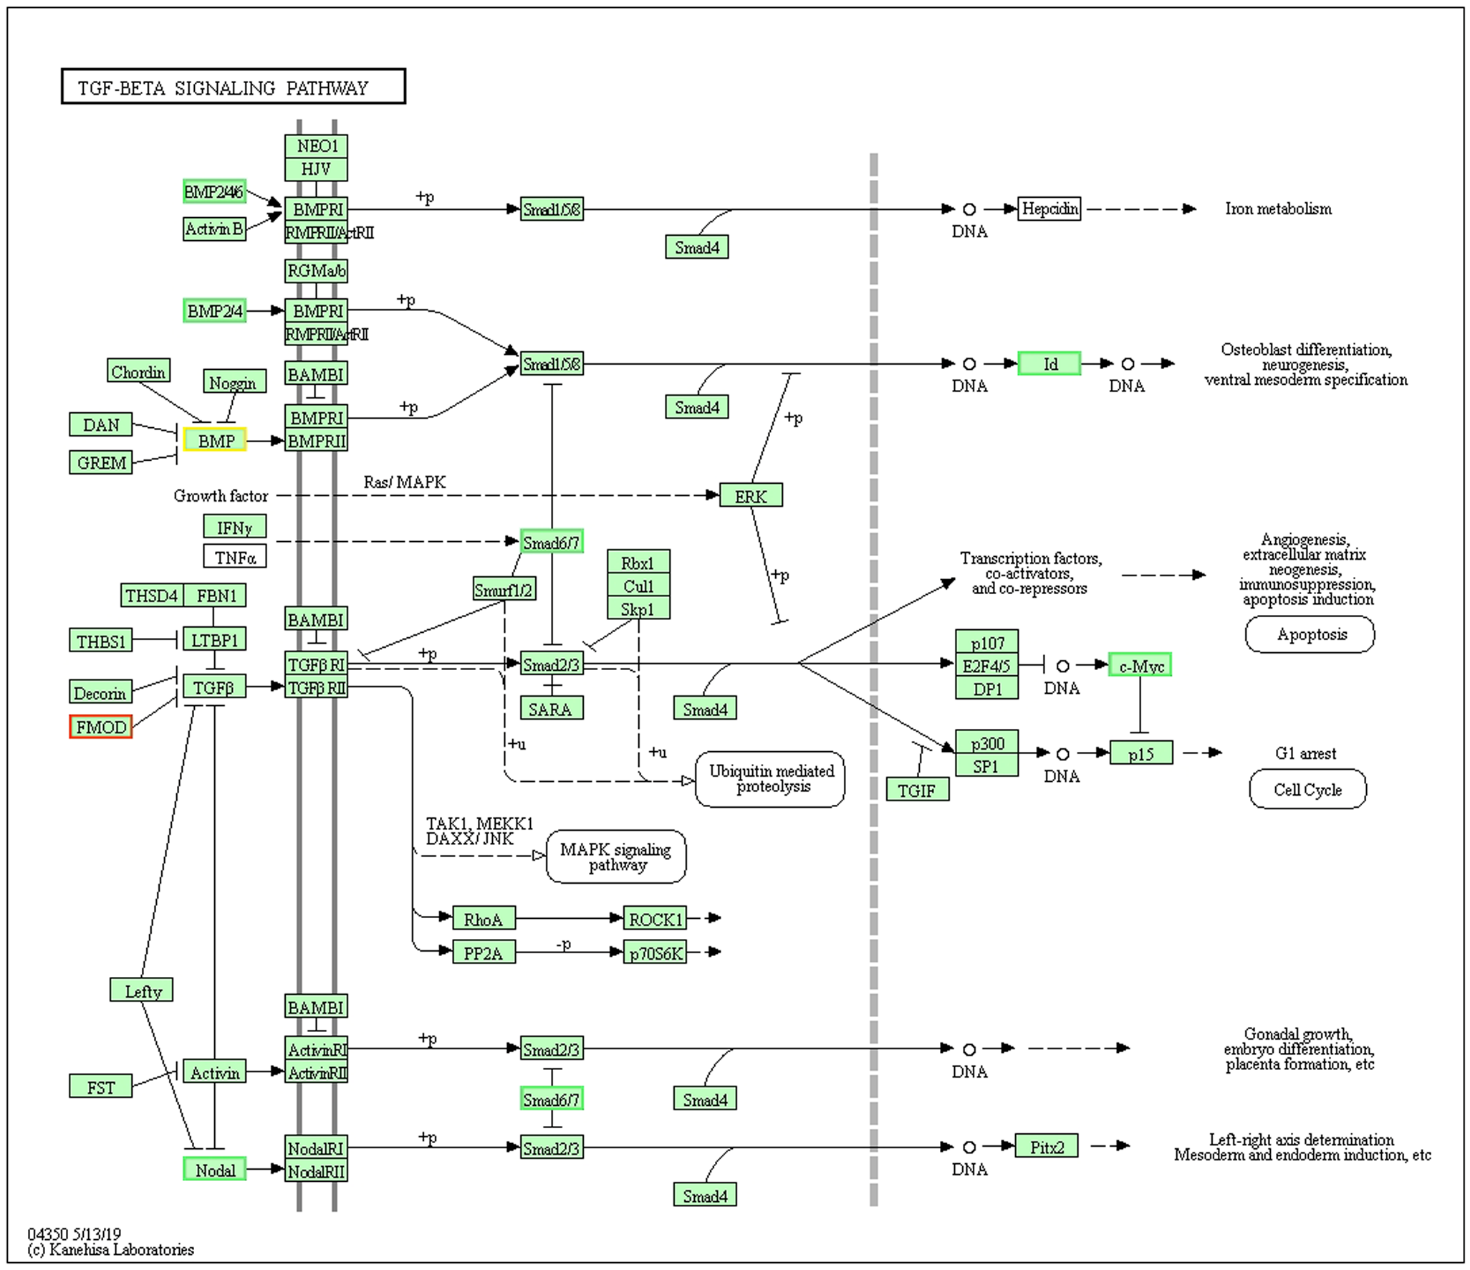


**Supplementary Figure 2.** KEGG enrichment pathway map of the expression regulation of core DEGs in TGF-β signaling pathway for High GAA group vs control group in RNA-seq analysis.


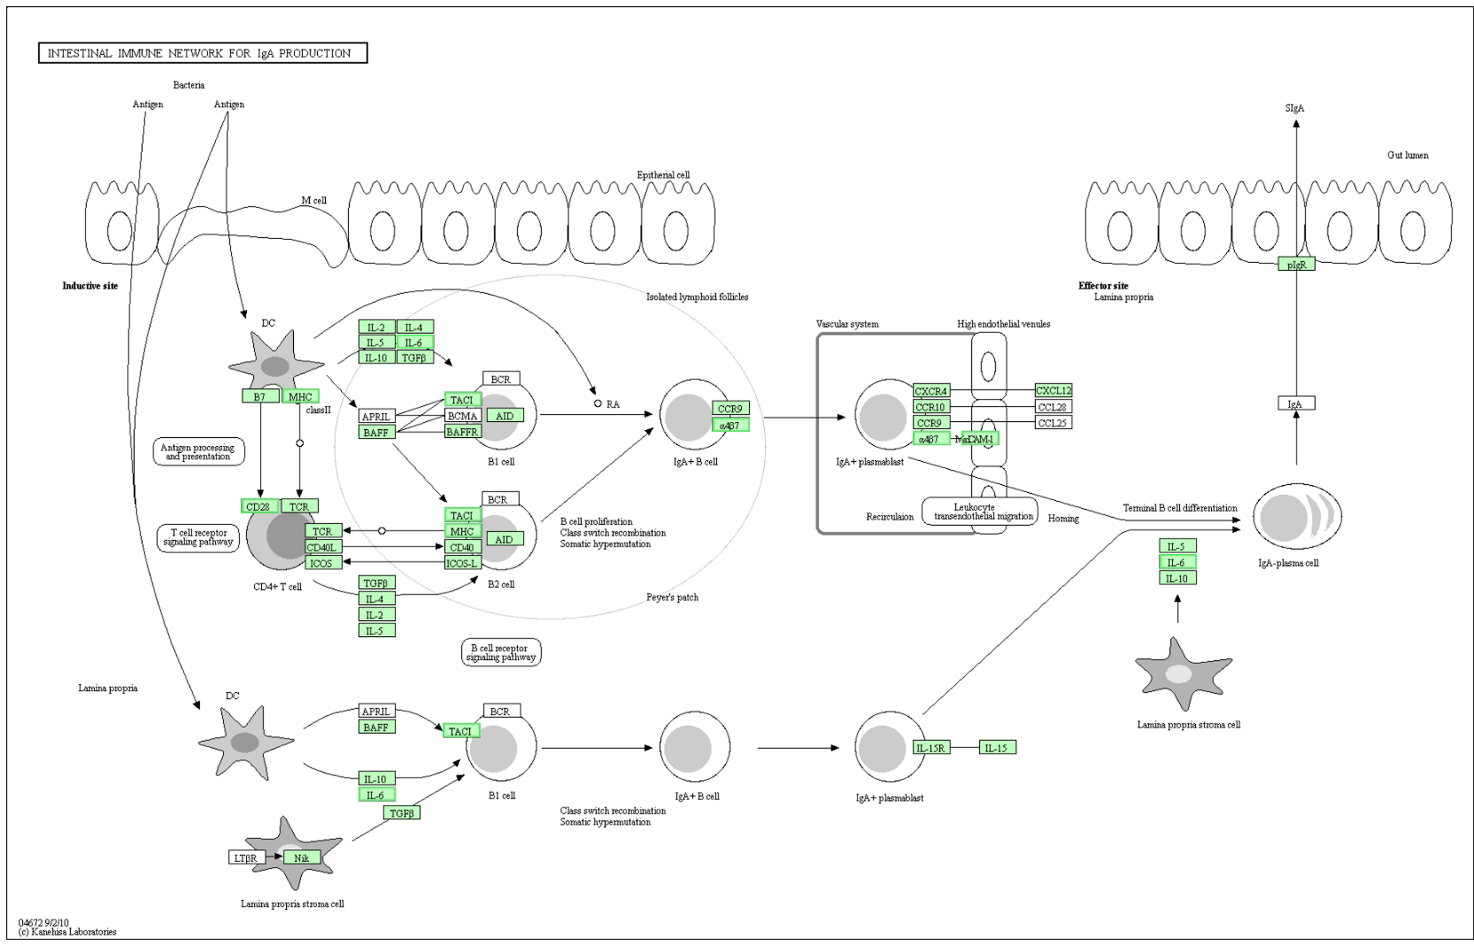


**Supplementary Figure 3.** KEGG enrichment pathway map of the expression regulation of core DEGs in intestinal immune network for IgA production pathway for High GAA group vs control group in RNA-seq analysis.


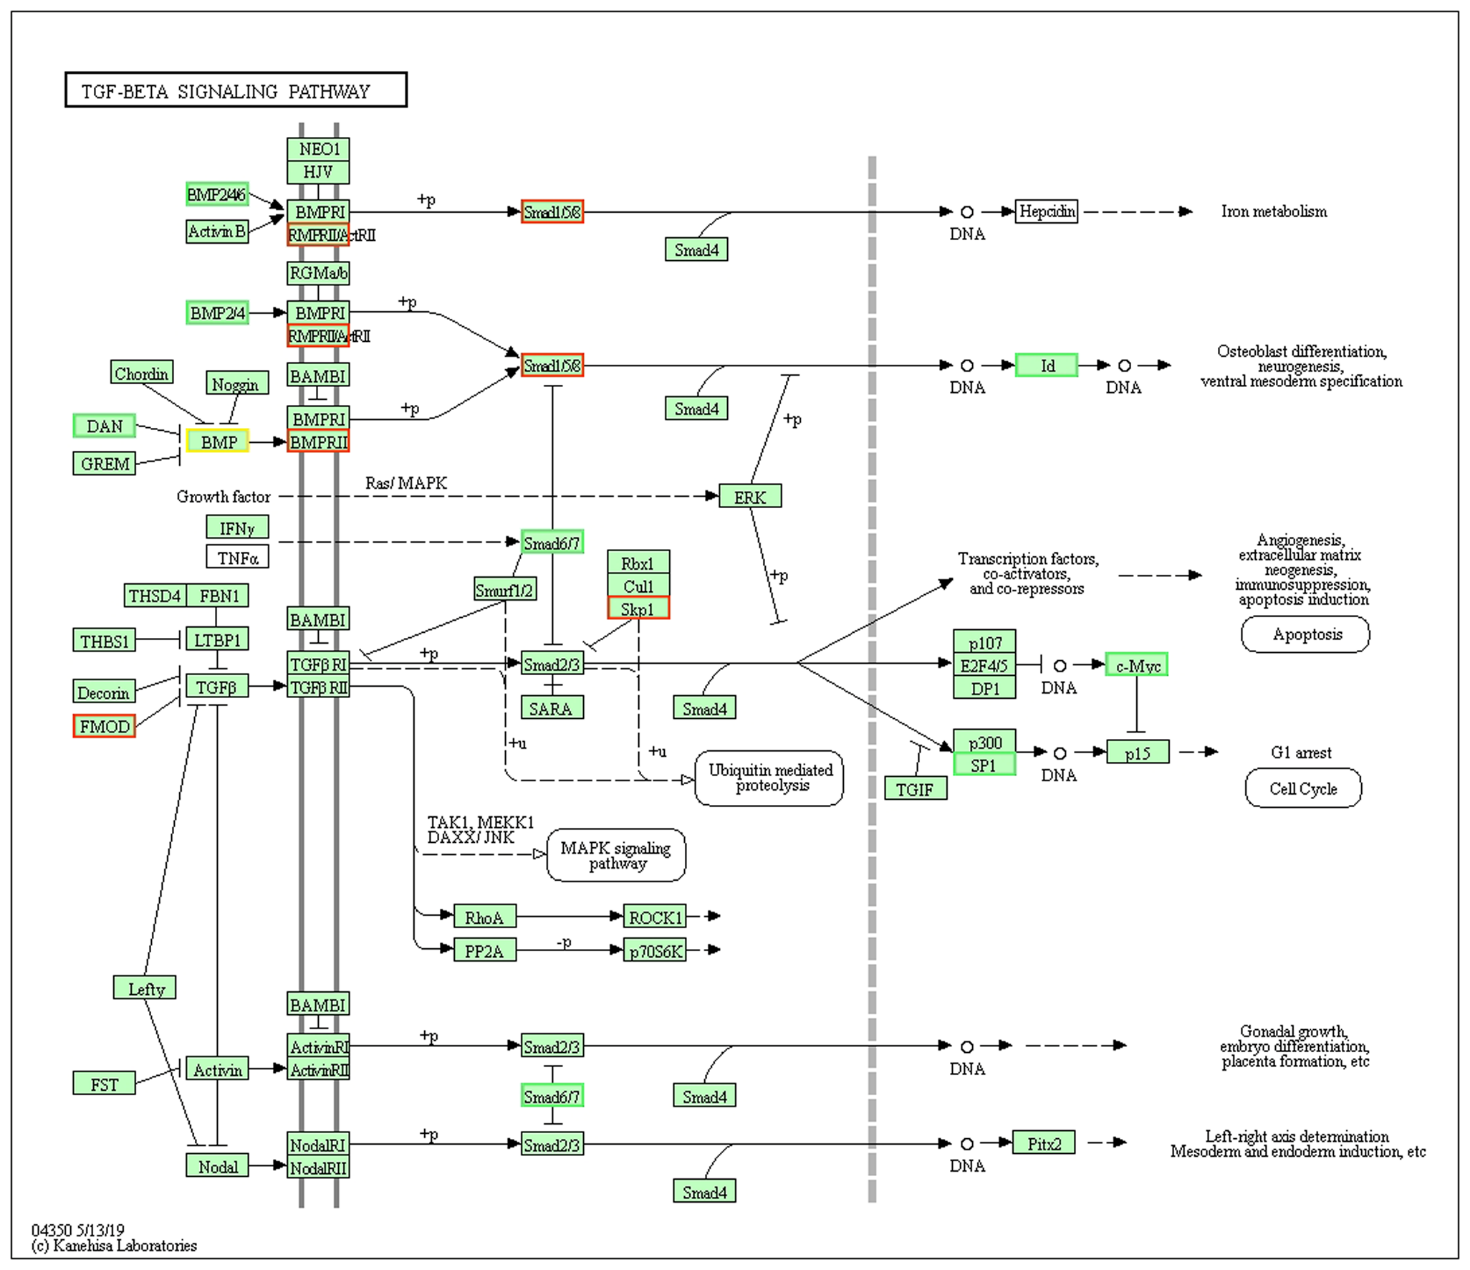


**Supplementary Figure 4.** KEGG enrichment pathway map of the expression regulation of core DEGs in TGF-β signaling pathway for High GAA group vs Normal GAA group in RNA-seq analysis.


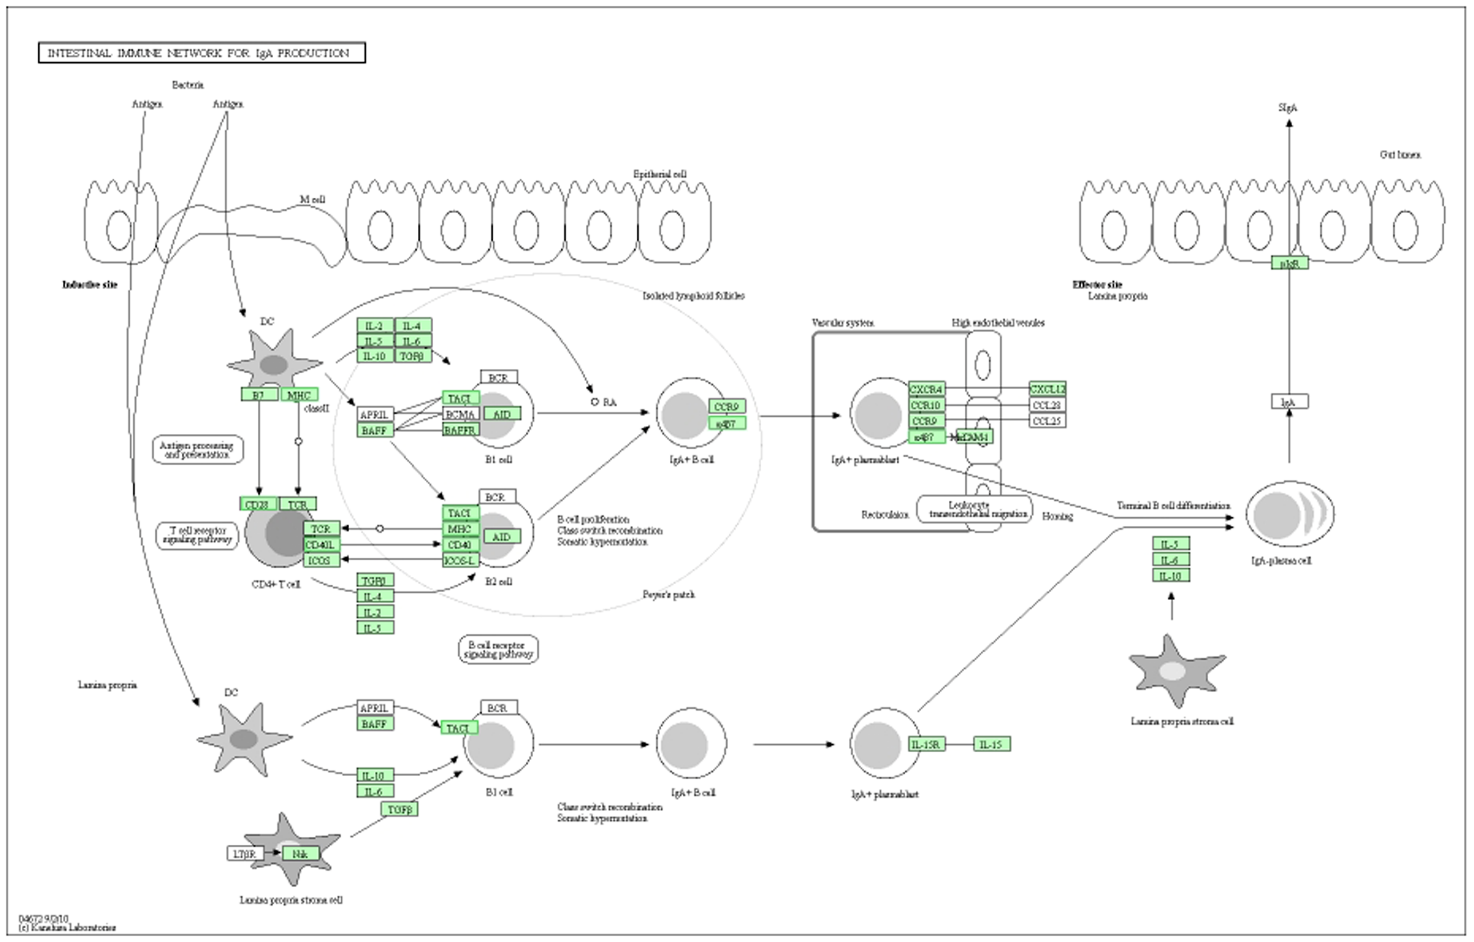


**Supplementary Figure 5.** KEGG enrichment pathway map of the expression regulation of core DEGs in intestinal immune network for IgA production pathway for High GAA group vs Normal GAA group in RNA-seq analysis.


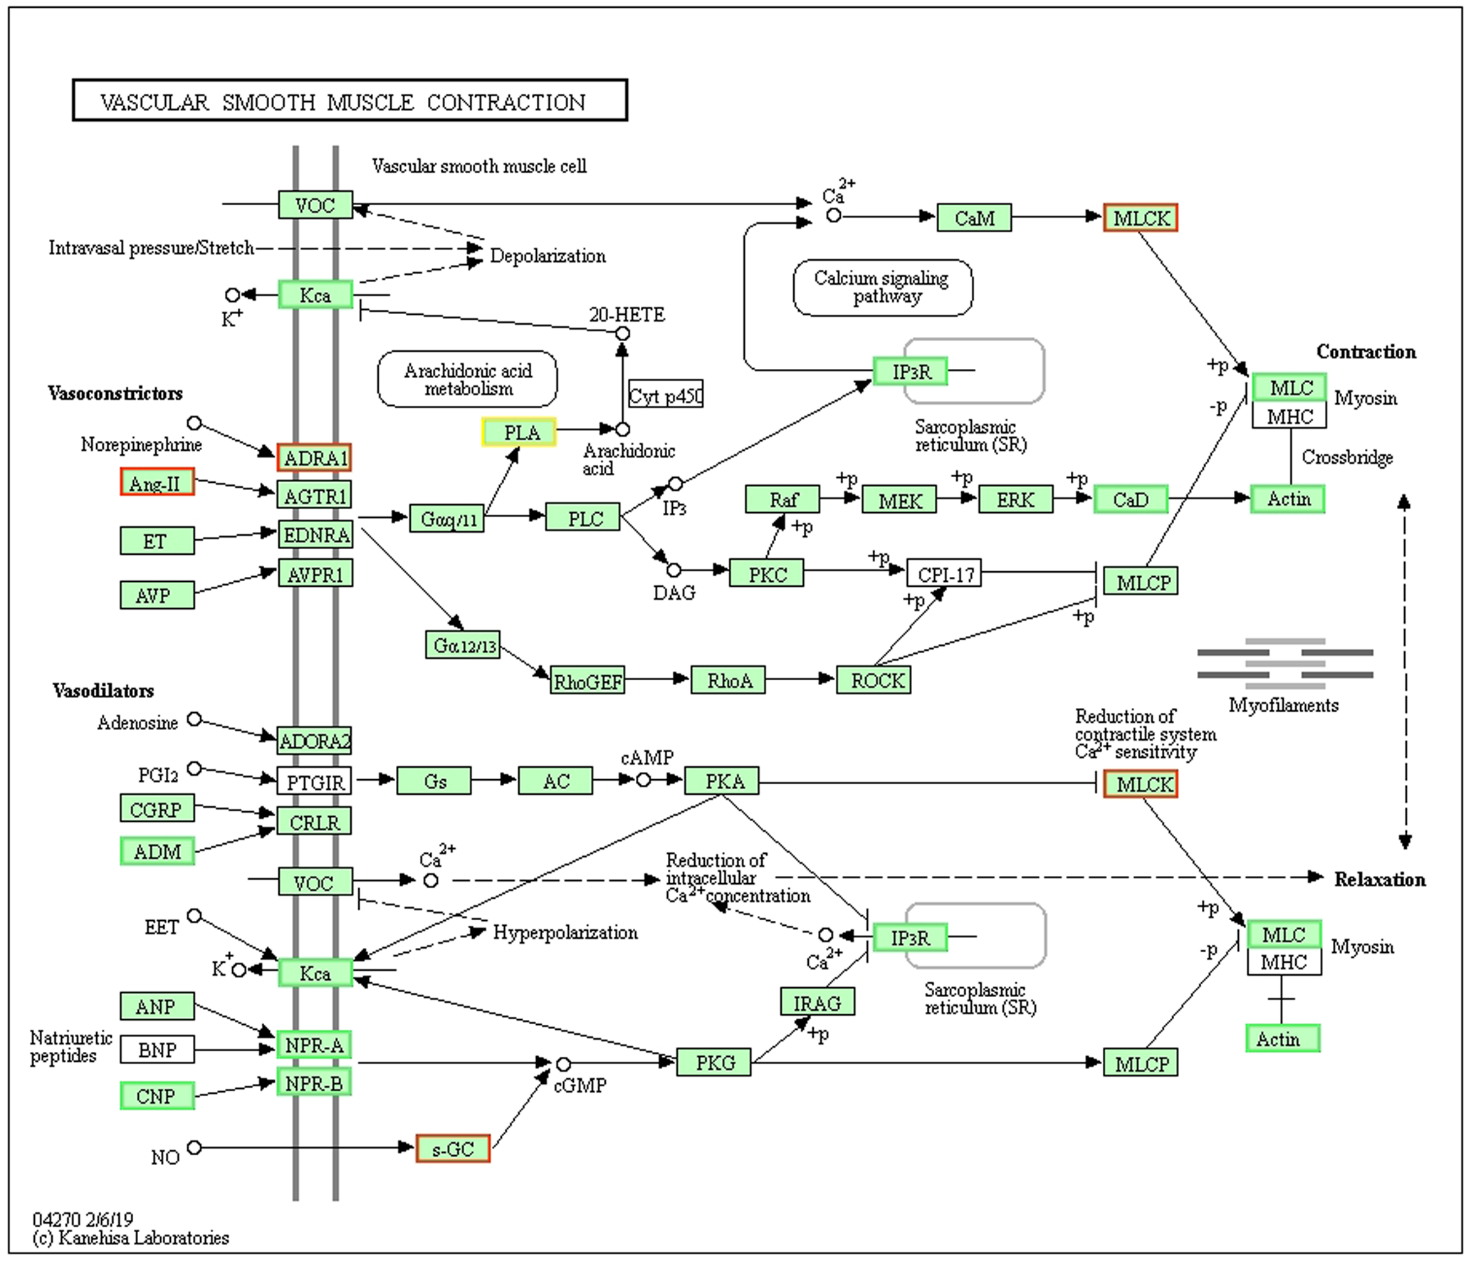


**Supplementary Figure 6.** KEGG enrichment pathway map of the expression regulation of core DEGs in vascular smooth muscle contraction pathway for High GAA group vs Normal GAA group in RNA-seq analysis.


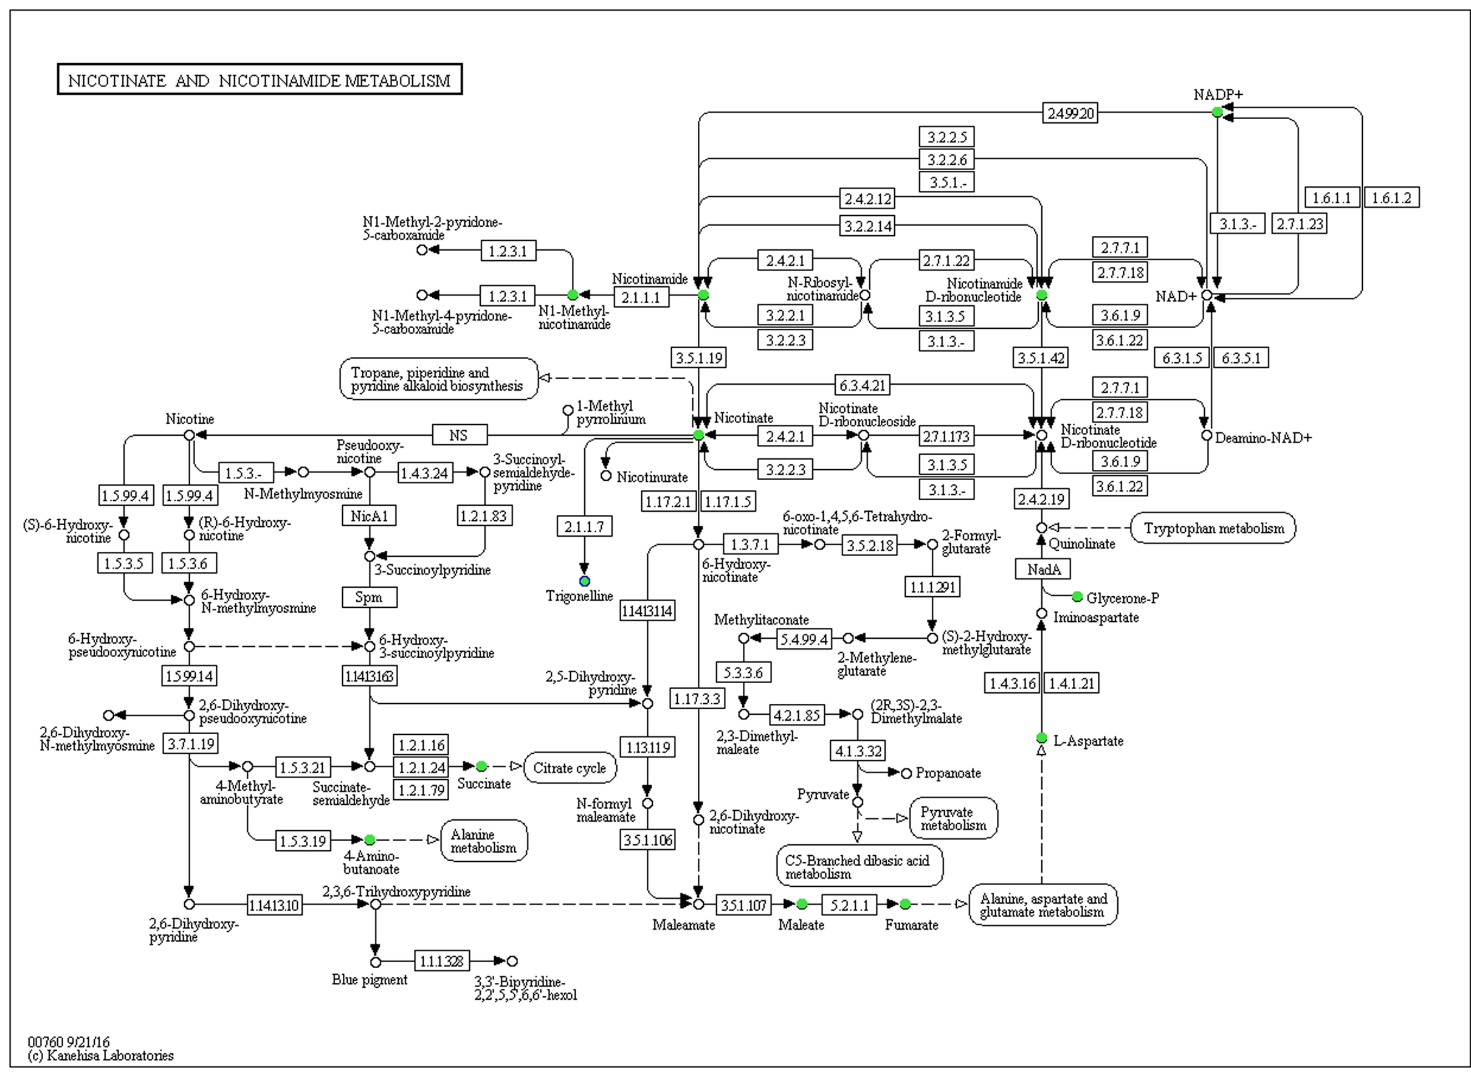


**Supplementary Figure 7.** KEGG enrichment pathway map of the specific enrichment of core SDMs in nicotinate and nicotinamide metabolism pathway for Normal GAA group vs control group in metabolomics analysis.


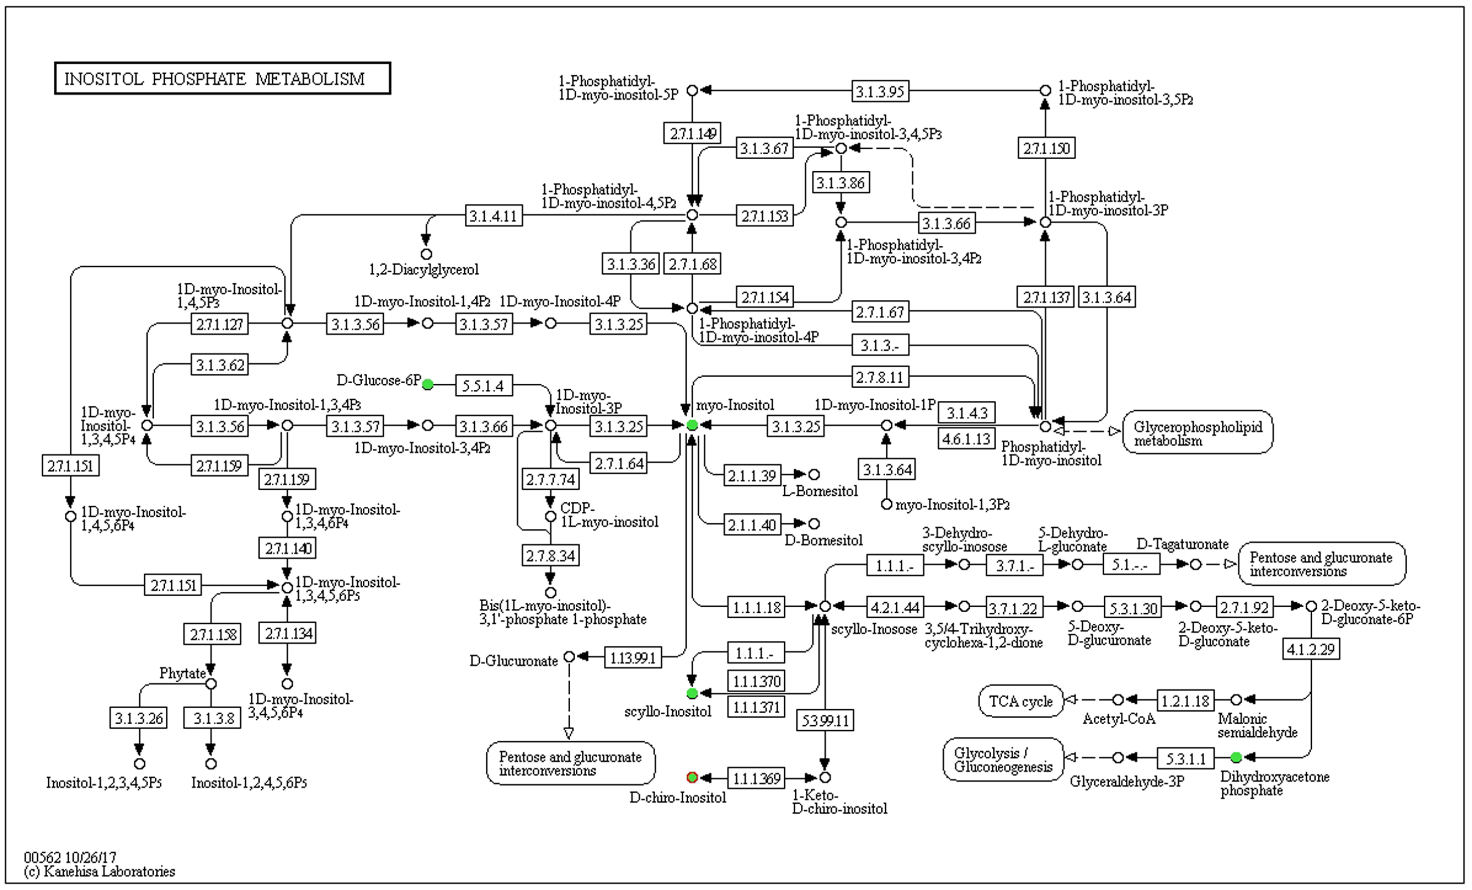


**Supplementary Figure 8.** KEGG enrichment pathway map of the specific enrichment of core SDMs in inositol phosphate metabolism pathway for Normal GAA group vs control group in metabolomics analysis.


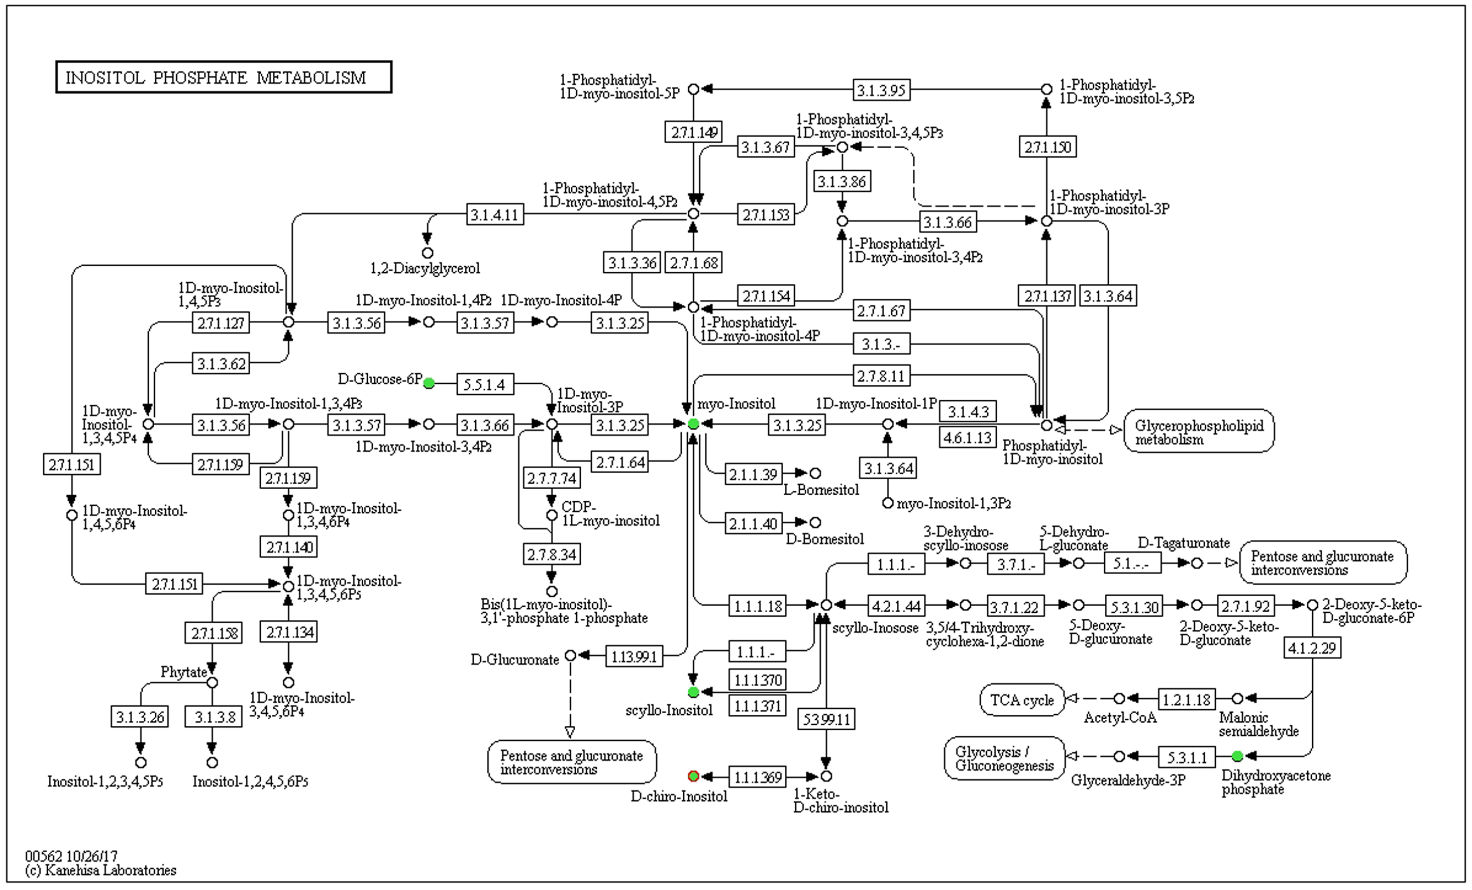


**Supplementary Figure 9.** KEGG enrichment pathway map of the specific enrichment of core SDMs in inositol phosphate metabolism pathway for High GAA group vs control group in metabolomics analysis.


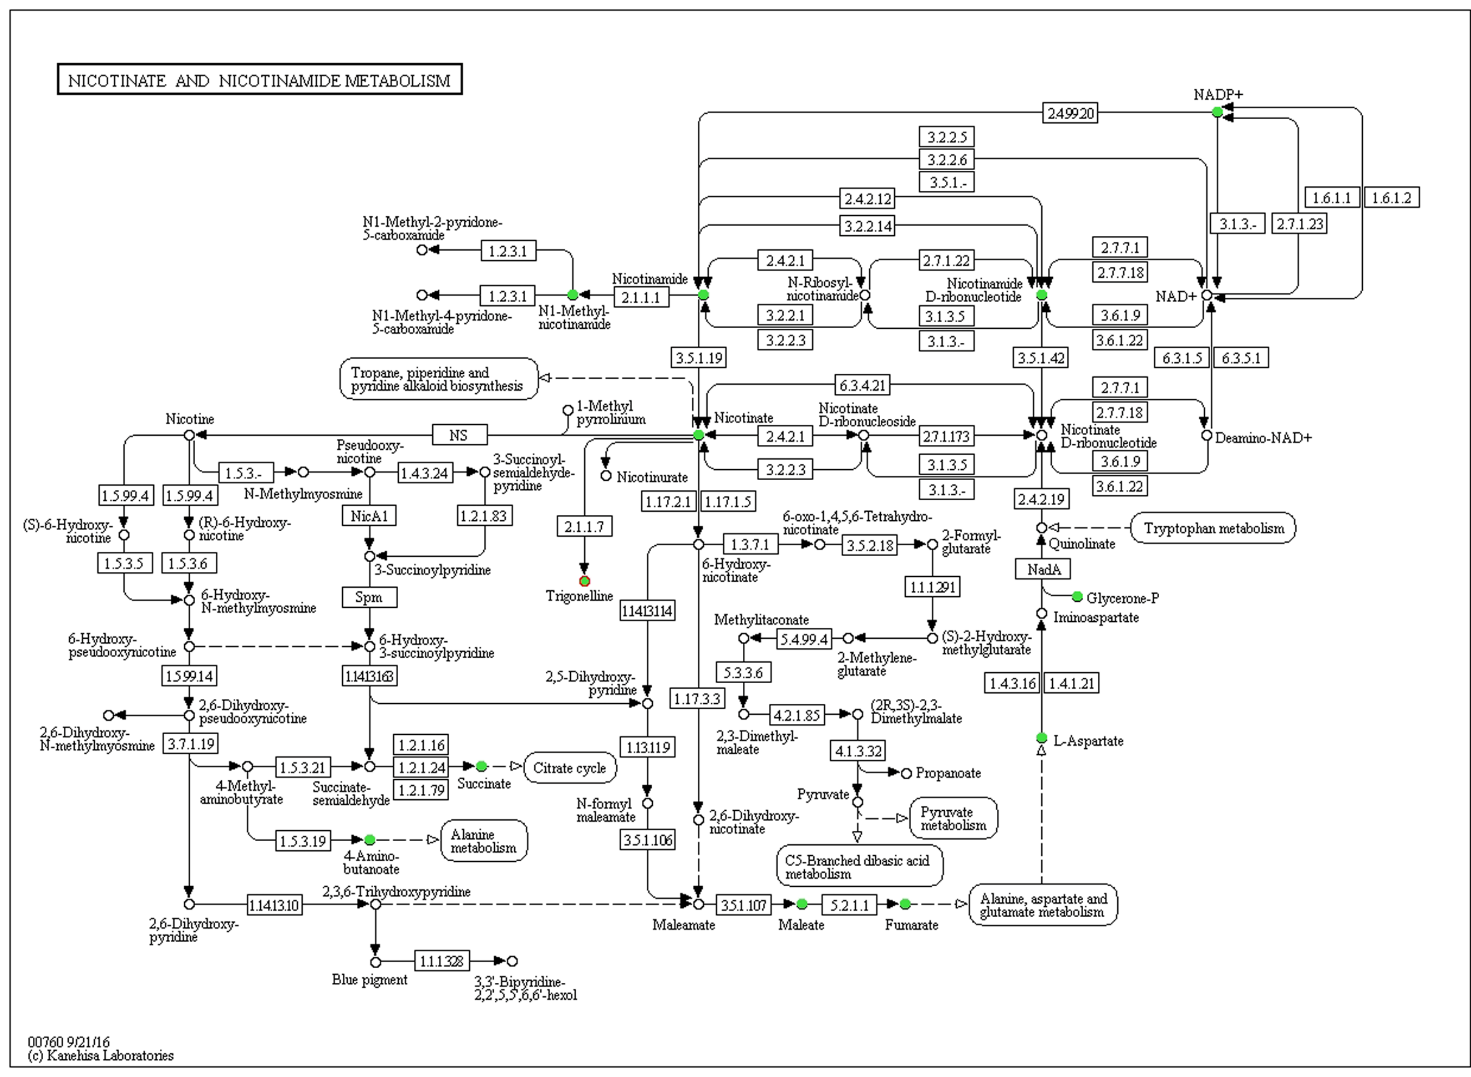


**Supplementary Figure 10.** KEGG enrichment pathway map of the specific enrichment of core SDMs in nicotinate and nicotinamide metabolism pathway for High GAA group vs Normal GAA group in metabolomics analysis.
