# Supplementary figures and images for: Association analysis of transcriptome and quasi-targeted metabolomics reveals the regulation mechanism underlying broiler muscle tissue development at different levels of dietary guanidinoacetic acid
Source: Frontiers journal article supplement (doi:10.3389/fvets.2024.1384028), 2024-04-25

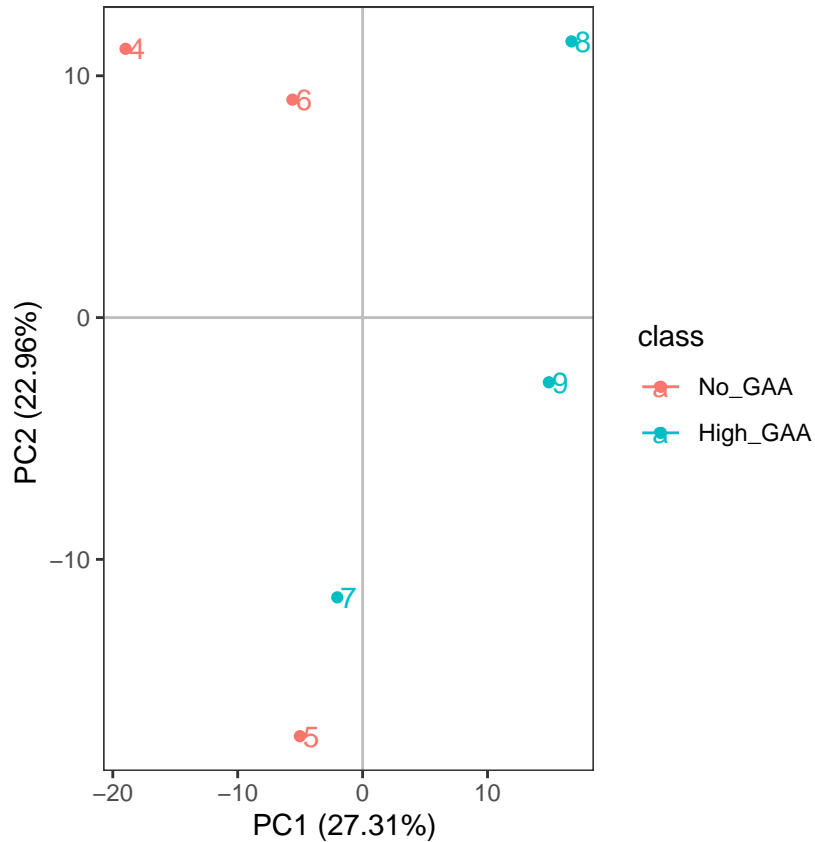

Supplement: Data_Sheet_1.ZIP [file Data_Sheet_1.ZIP]

No\_GAA.vs.Control

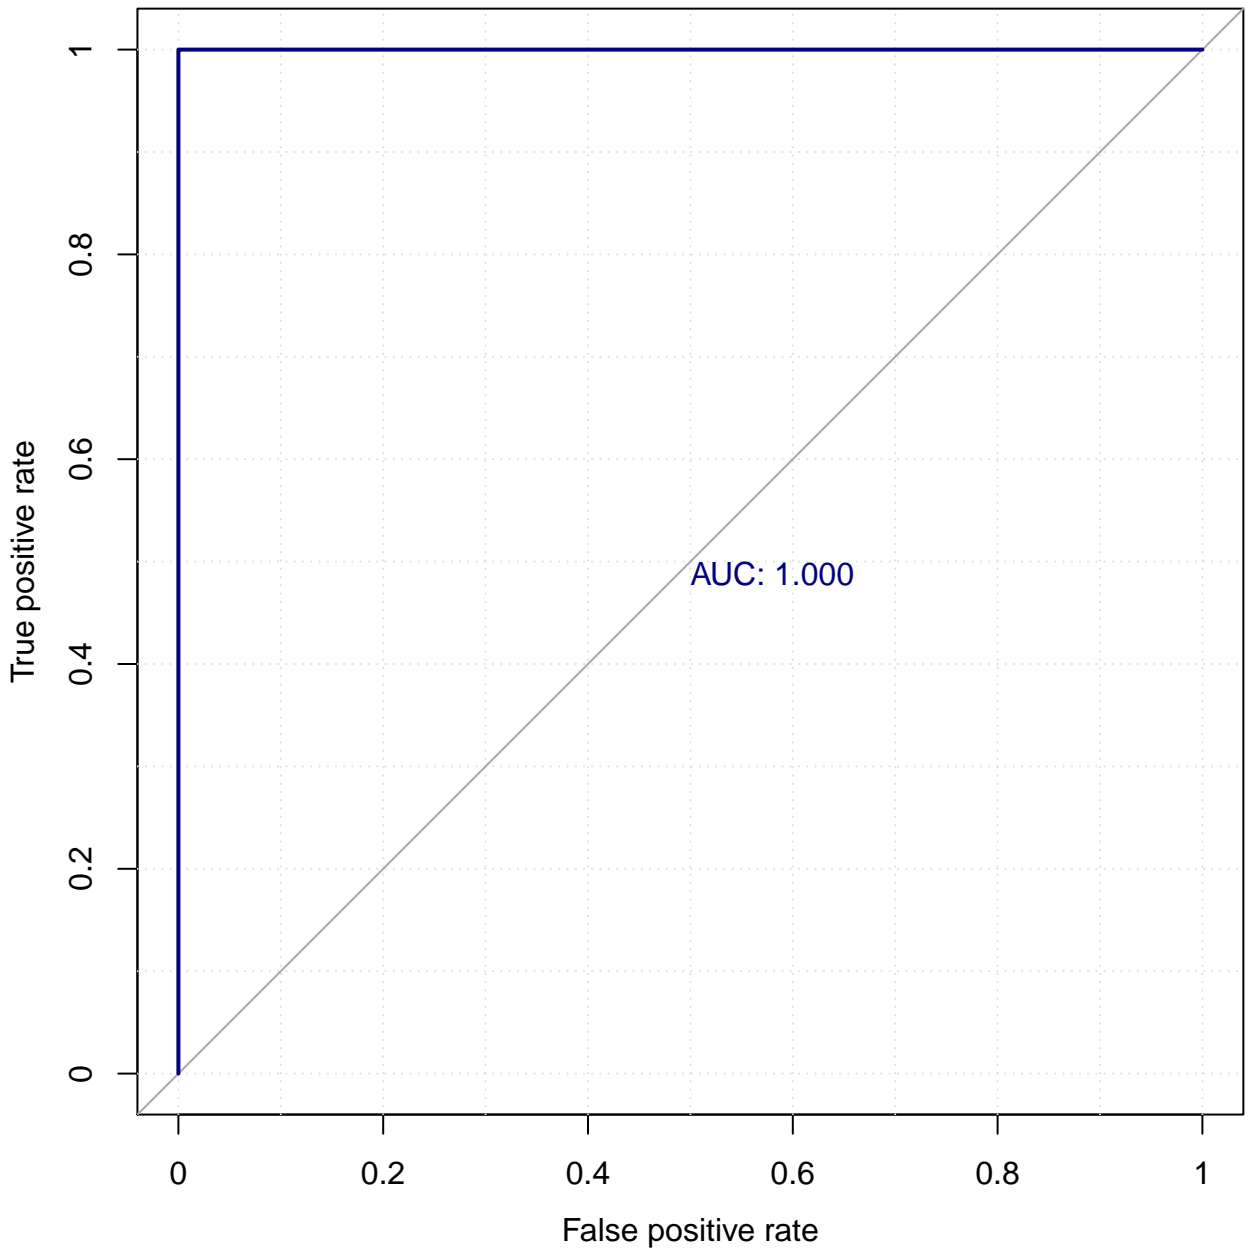

Supplement: Data_Sheet_1.ZIP [file Data_Sheet_1.ZIP]

High\_GAA.vs.No\_GAA

Metabolites

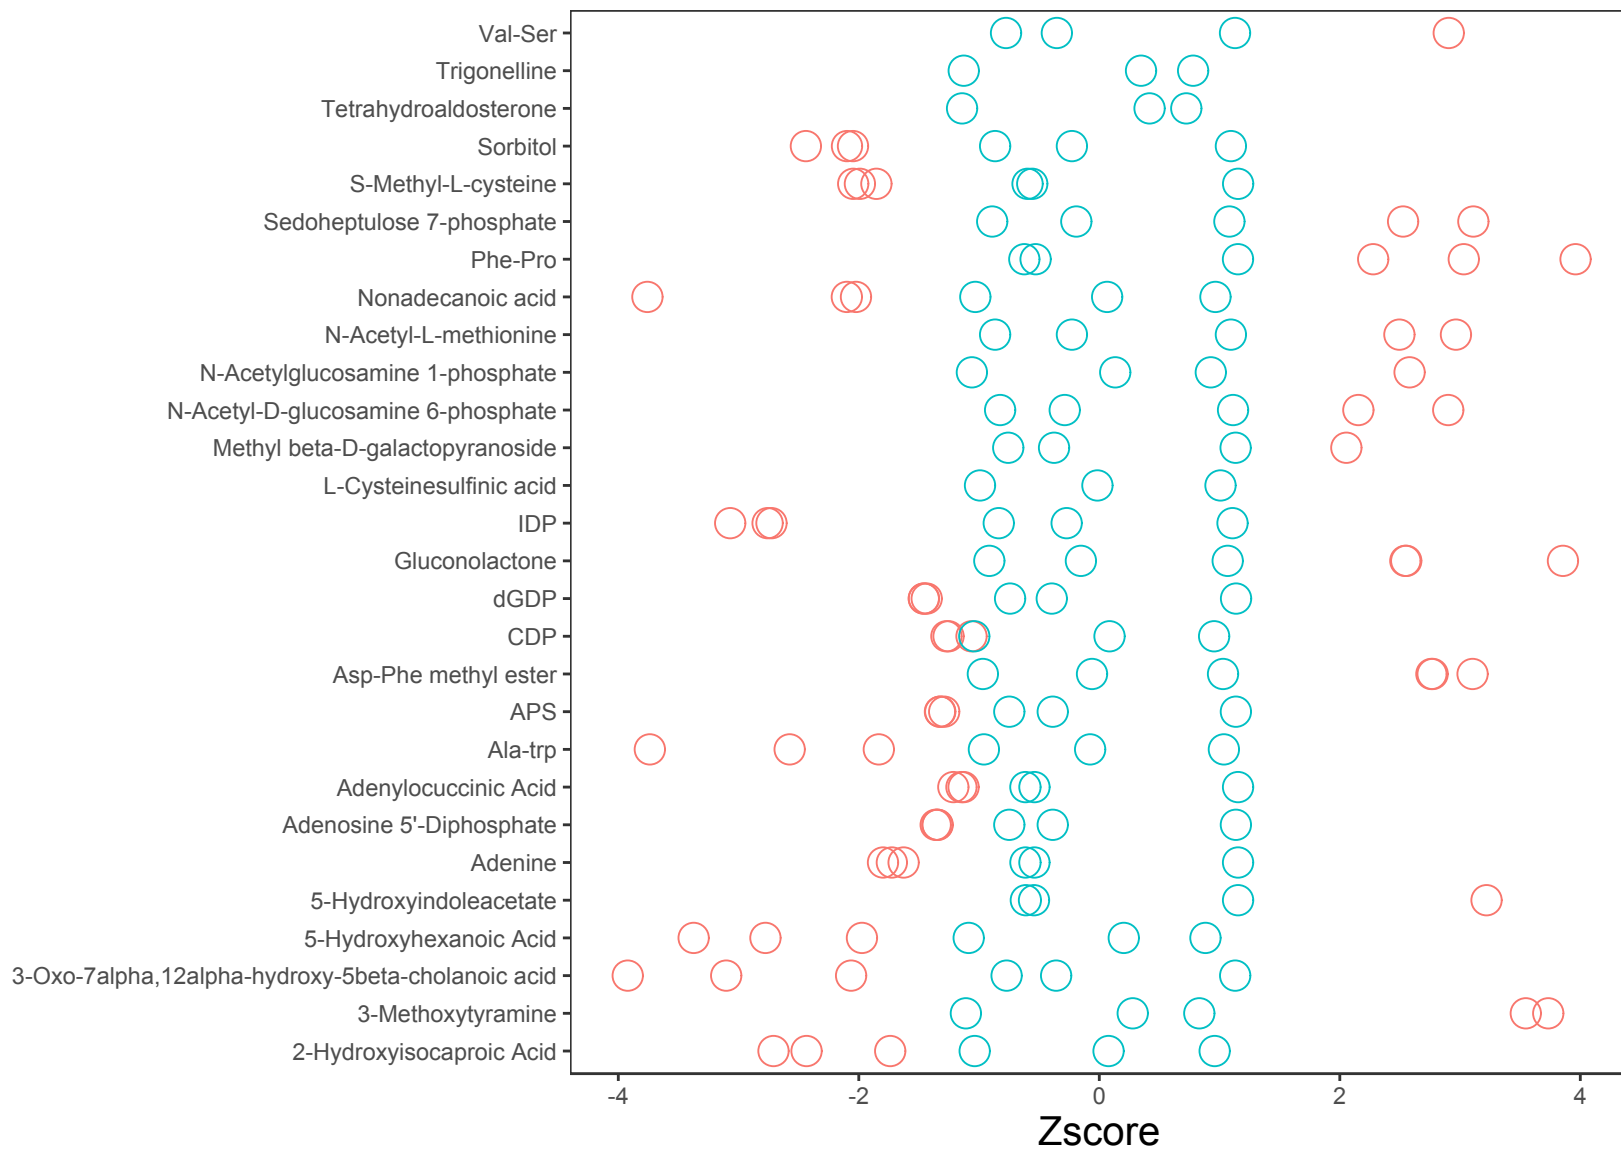

Group

High\_GAA  
No\_GAA

Supplement: Data_Sheet_1.ZIP [file Data_Sheet_1.ZIP]

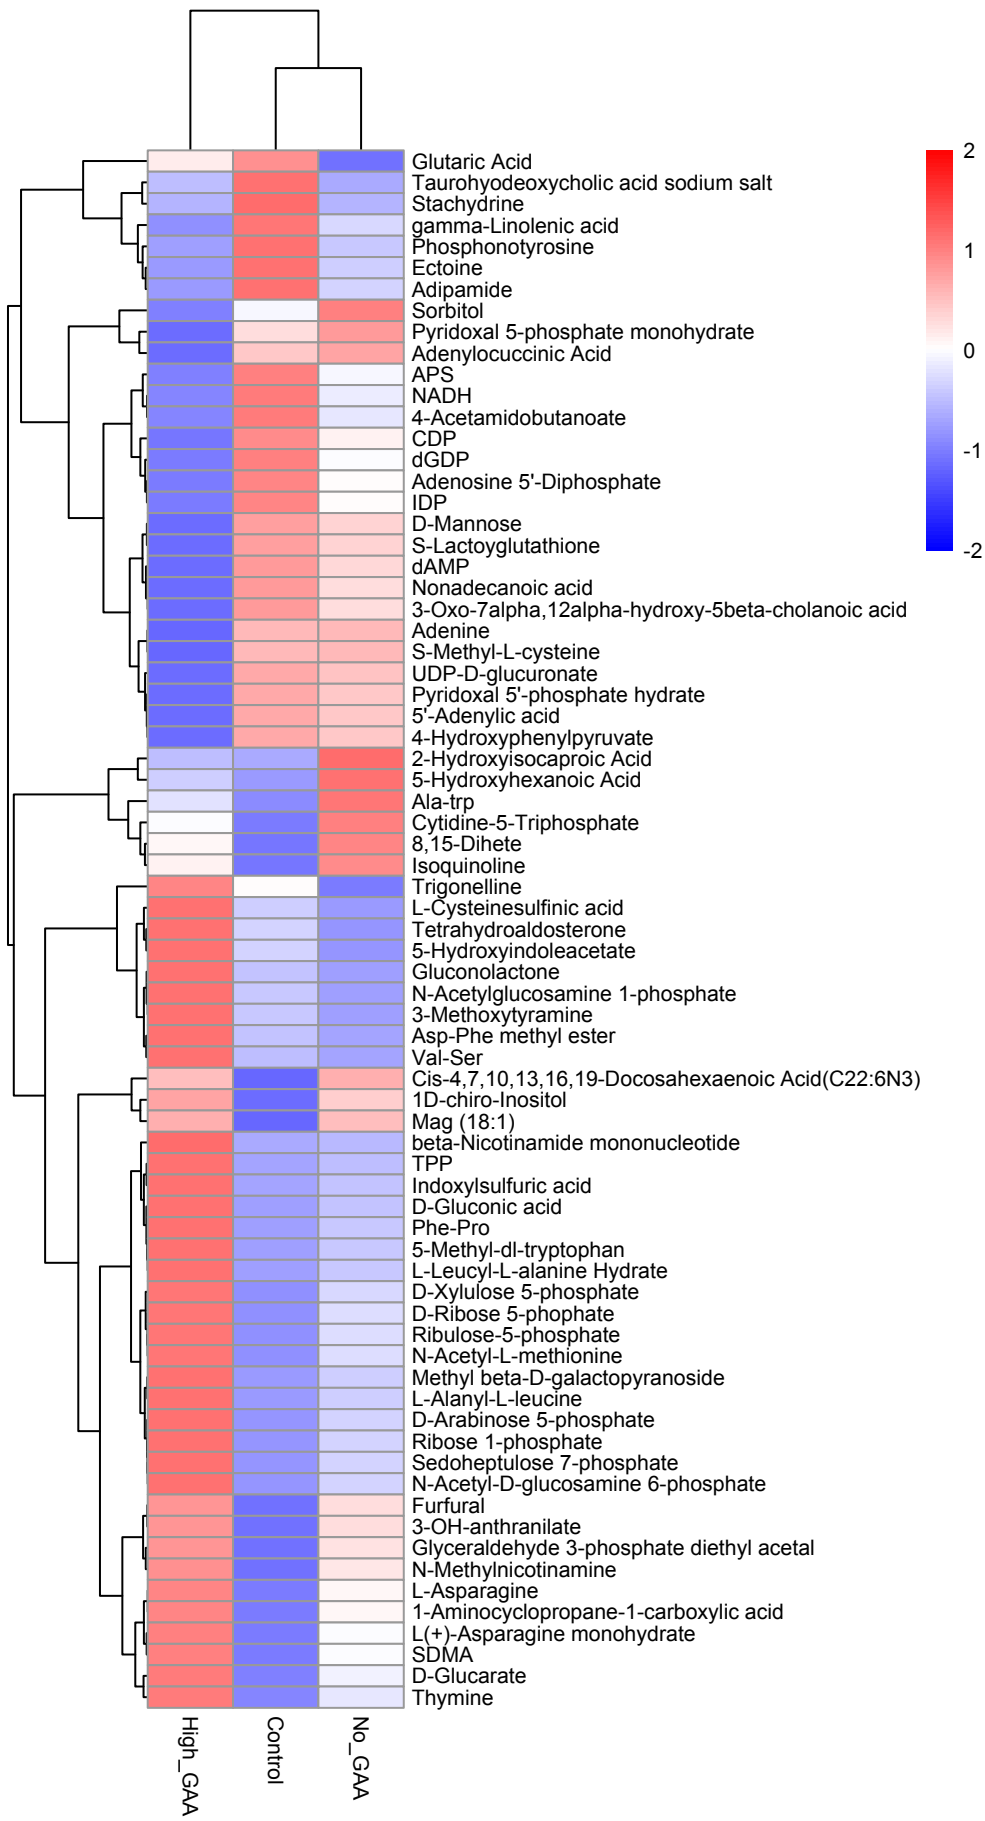

Supplement: Data_Sheet_1.ZIP [file Data_Sheet_1.ZIP]

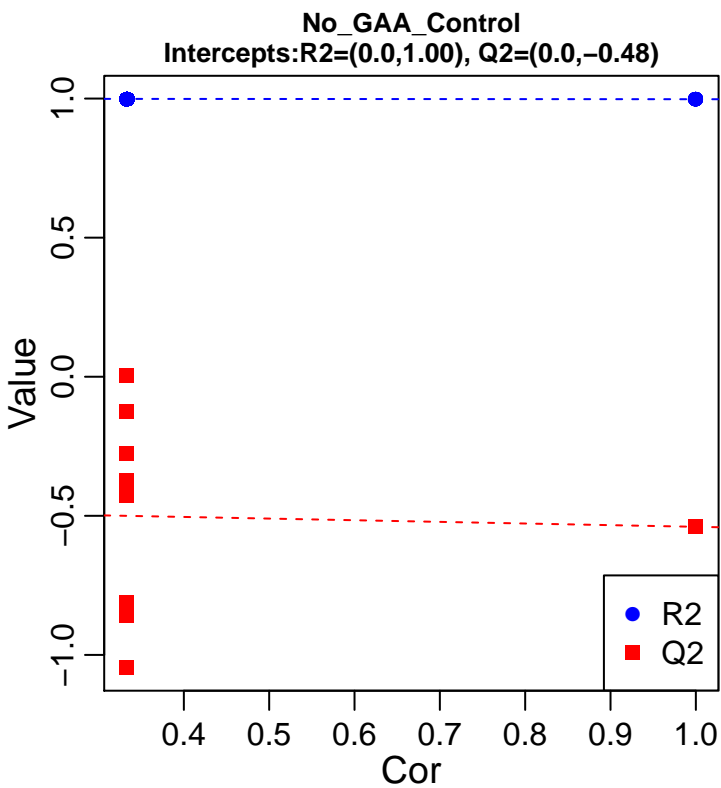

Supplement: Data_Sheet_1.ZIP [file Data_Sheet_1.ZIP]

class    Control    No\_GAA

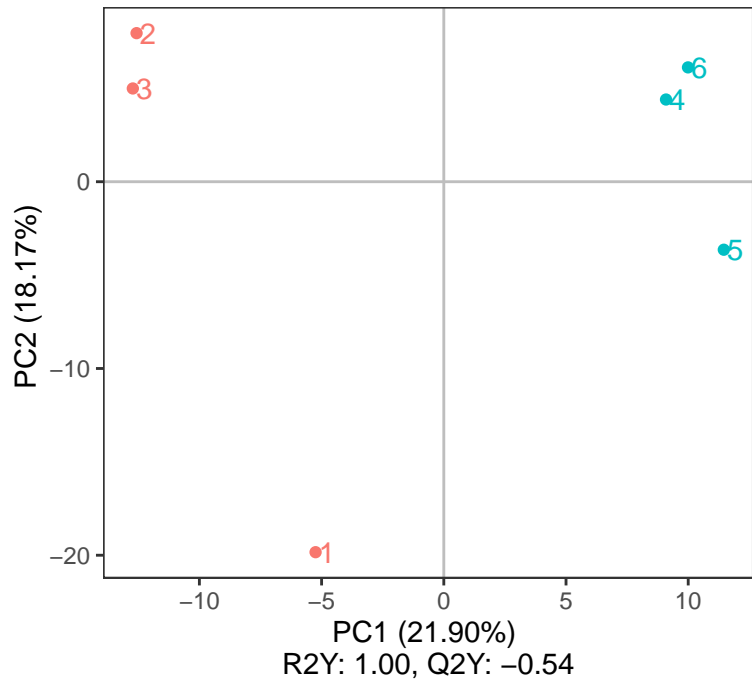

Supplement: Data_Sheet_1.ZIP [file Data_Sheet_1.ZIP]

High\_GAA.vs.No\_GAA

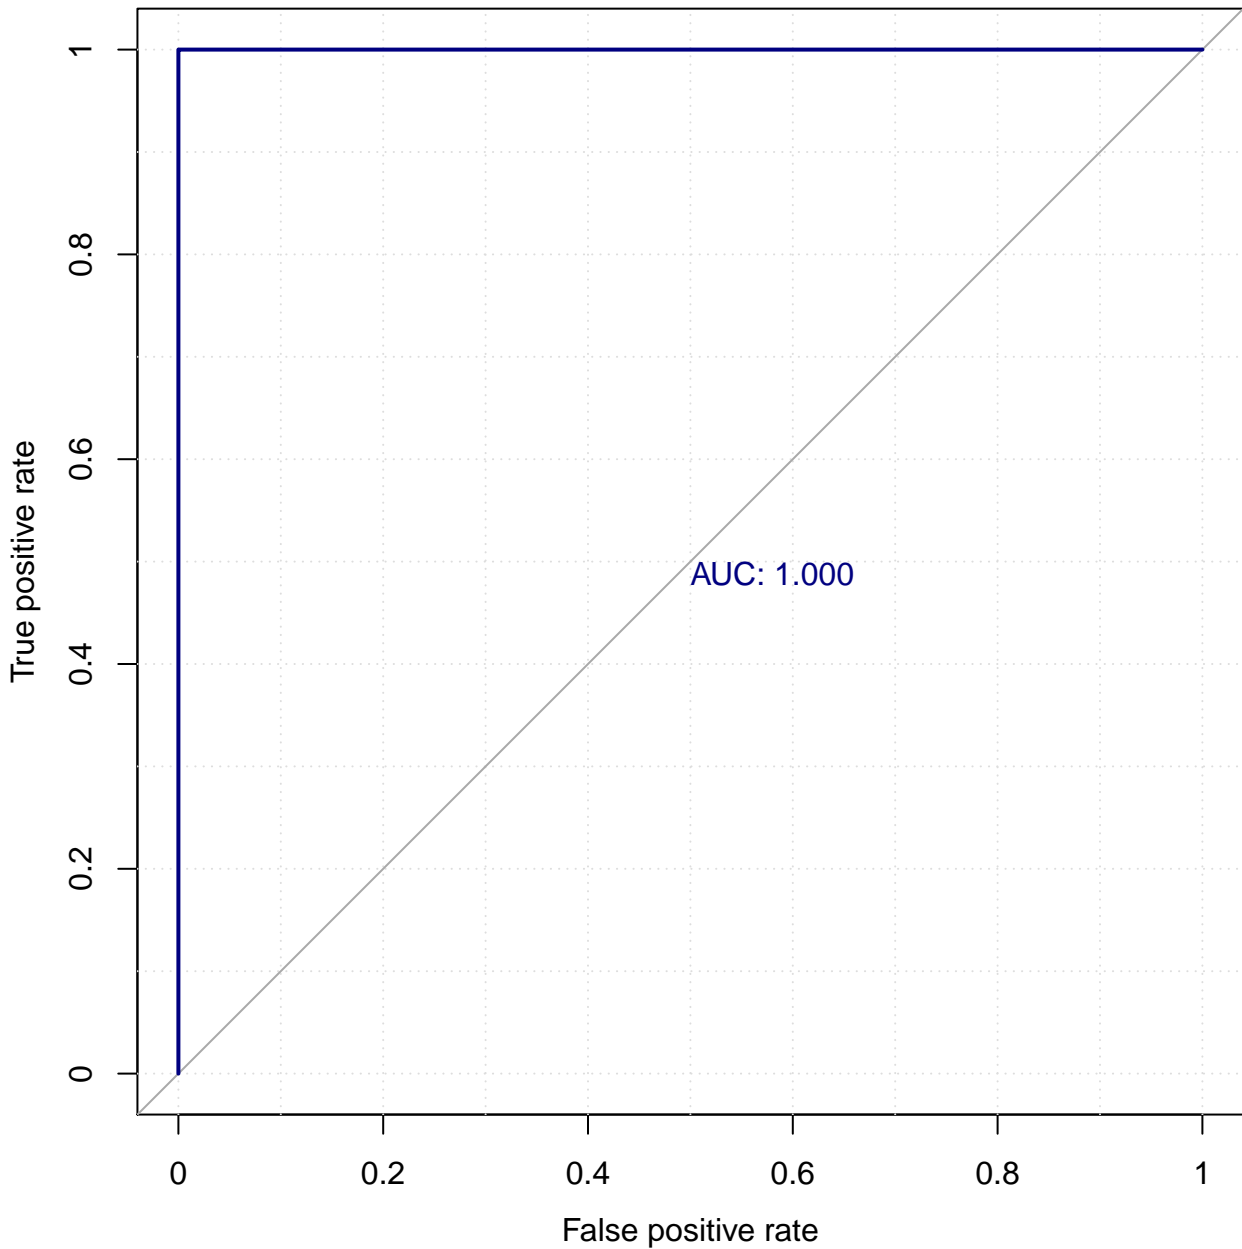

Supplement: Data_Sheet_1.ZIP [file Data_Sheet_1.ZIP]

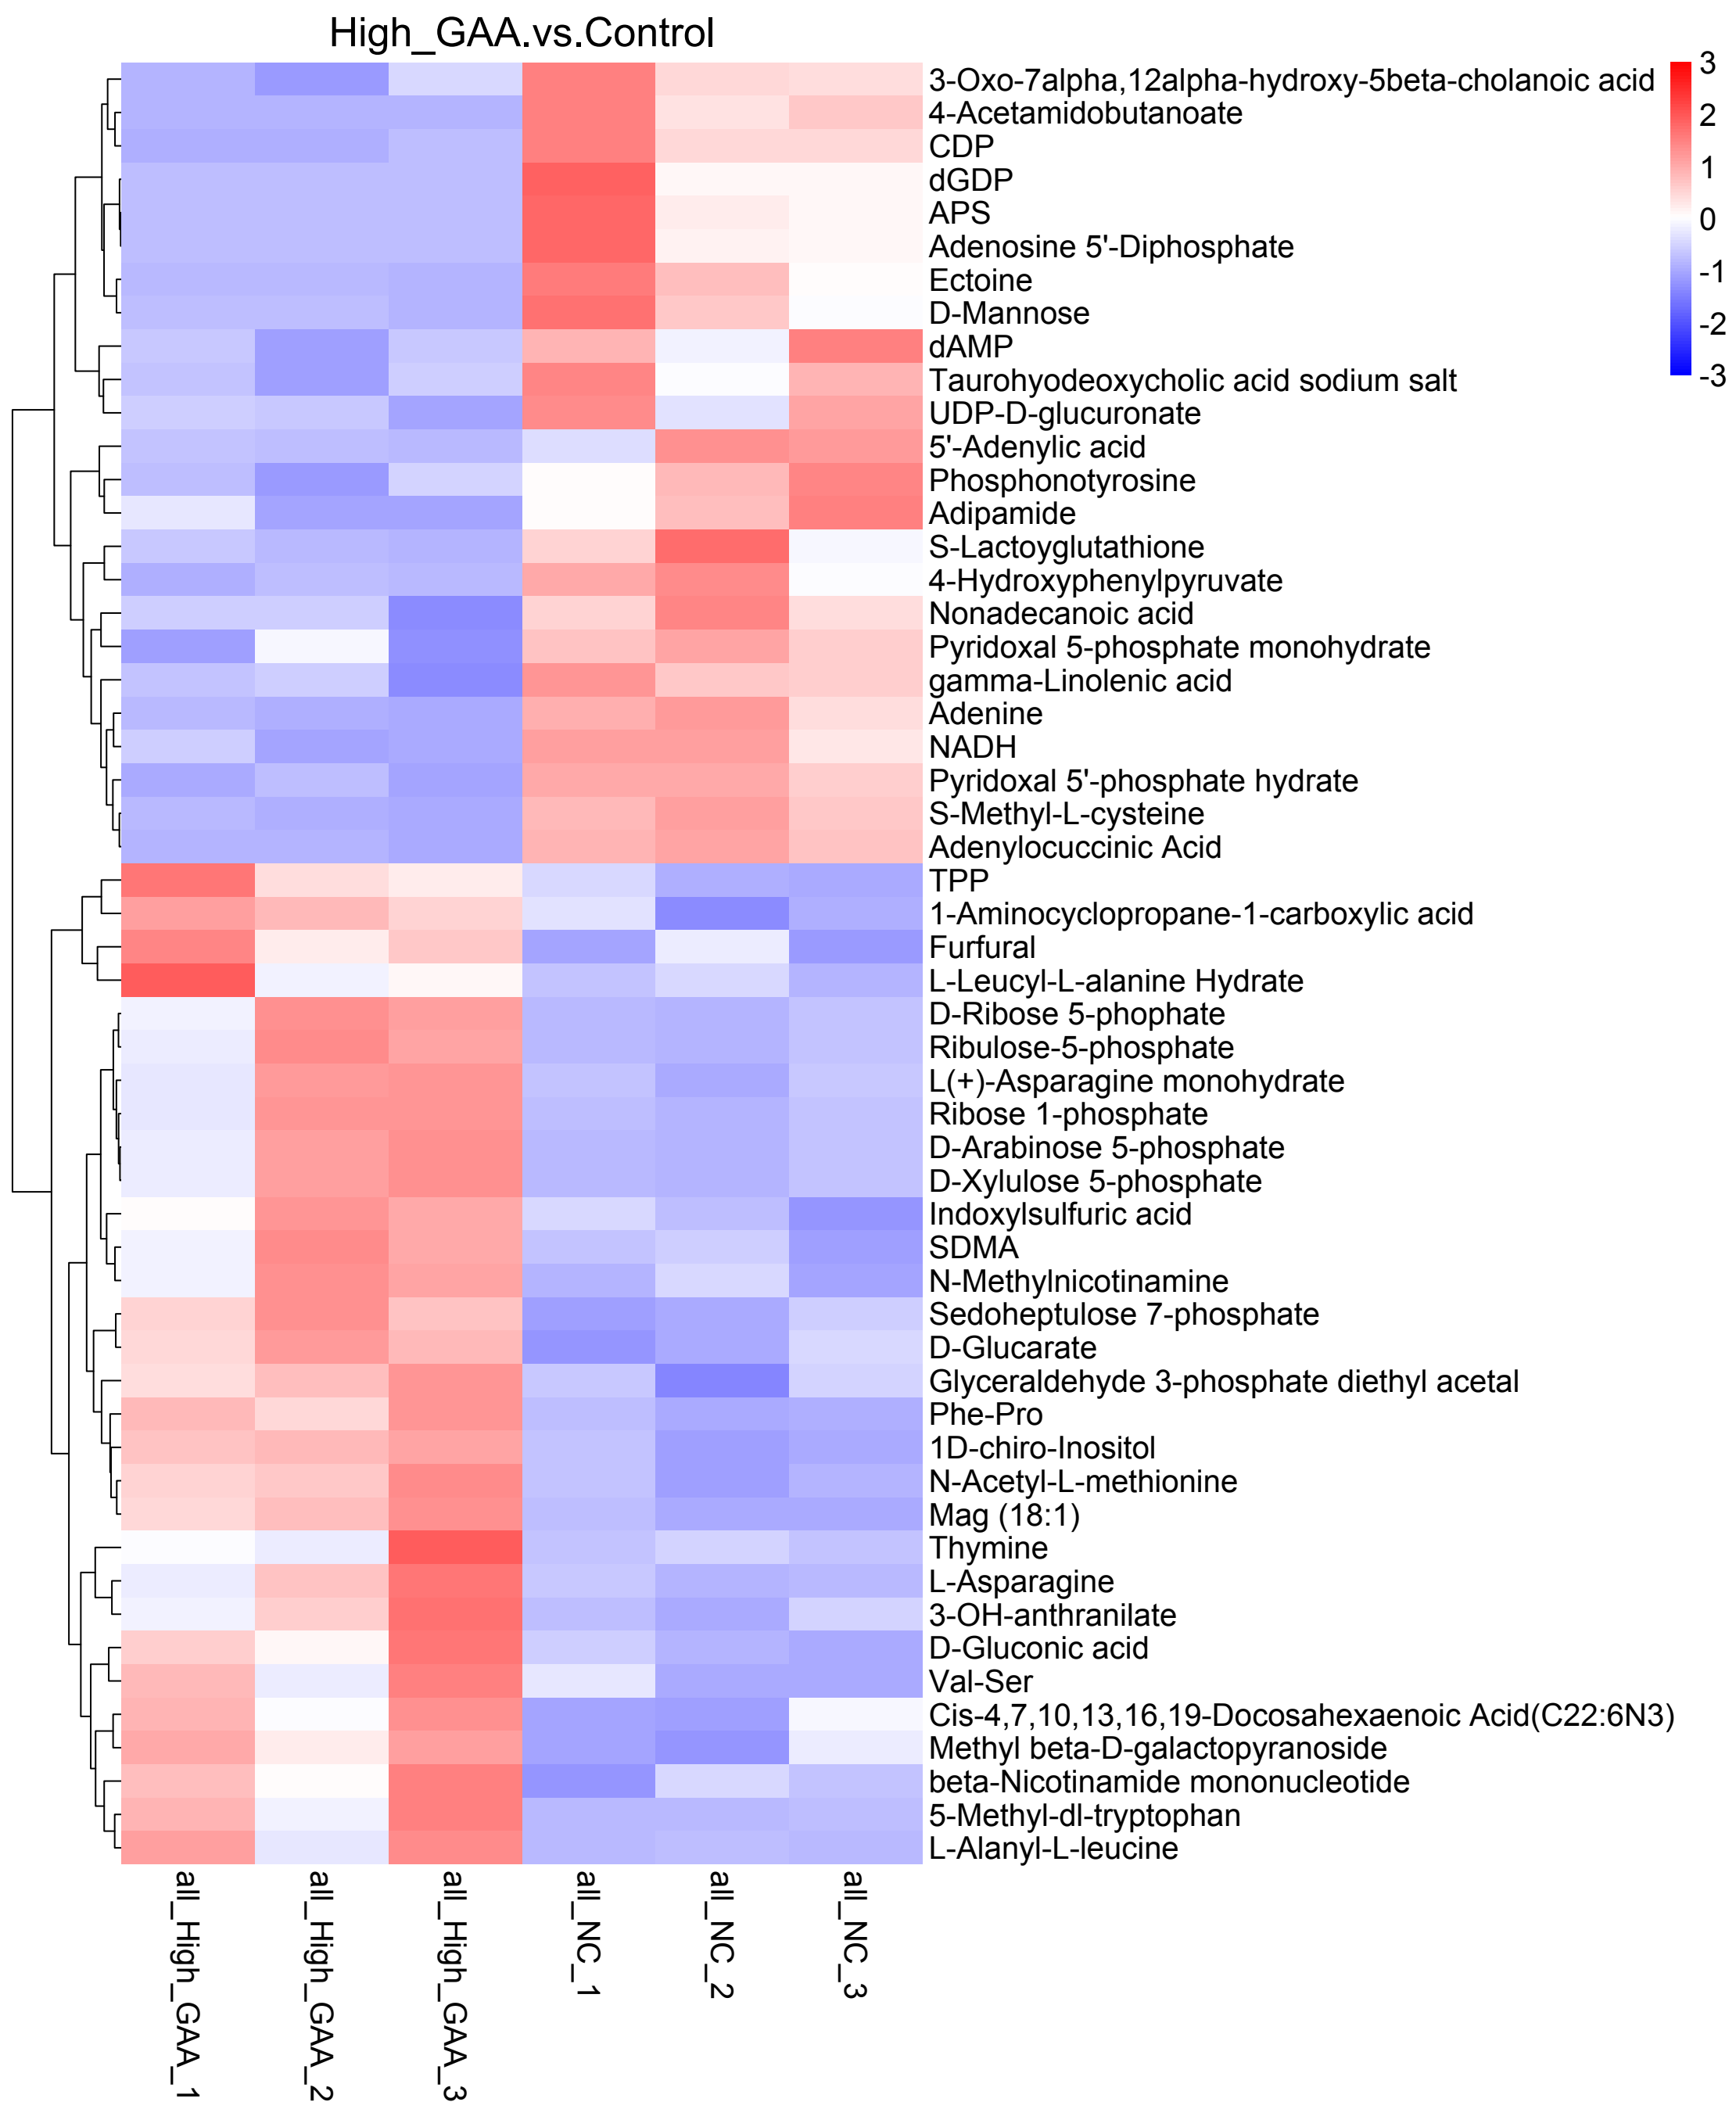

Supplement: Data_Sheet_1.ZIP [file Data_Sheet_1.ZIP]

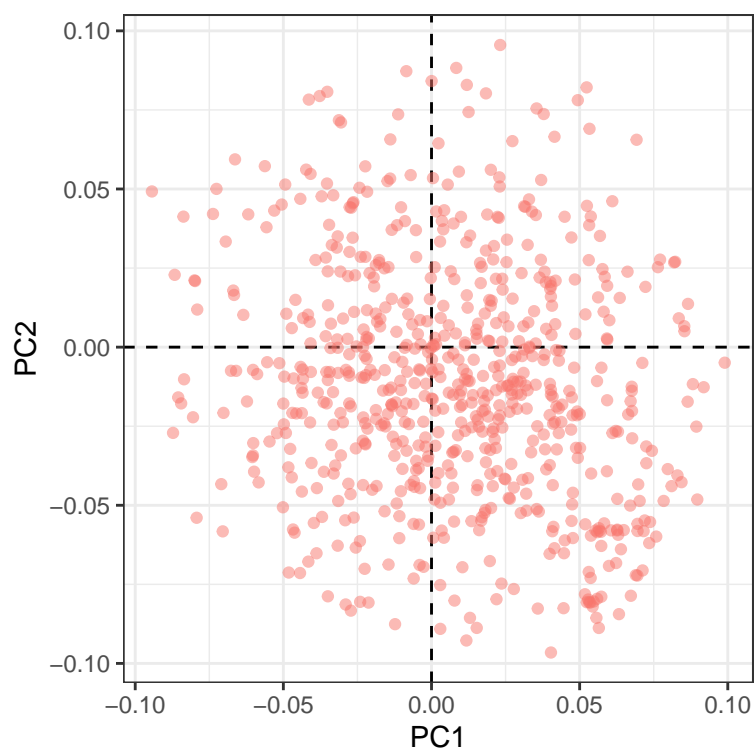

Supplement: Data_Sheet_1.ZIP [file Data_Sheet_1.ZIP]

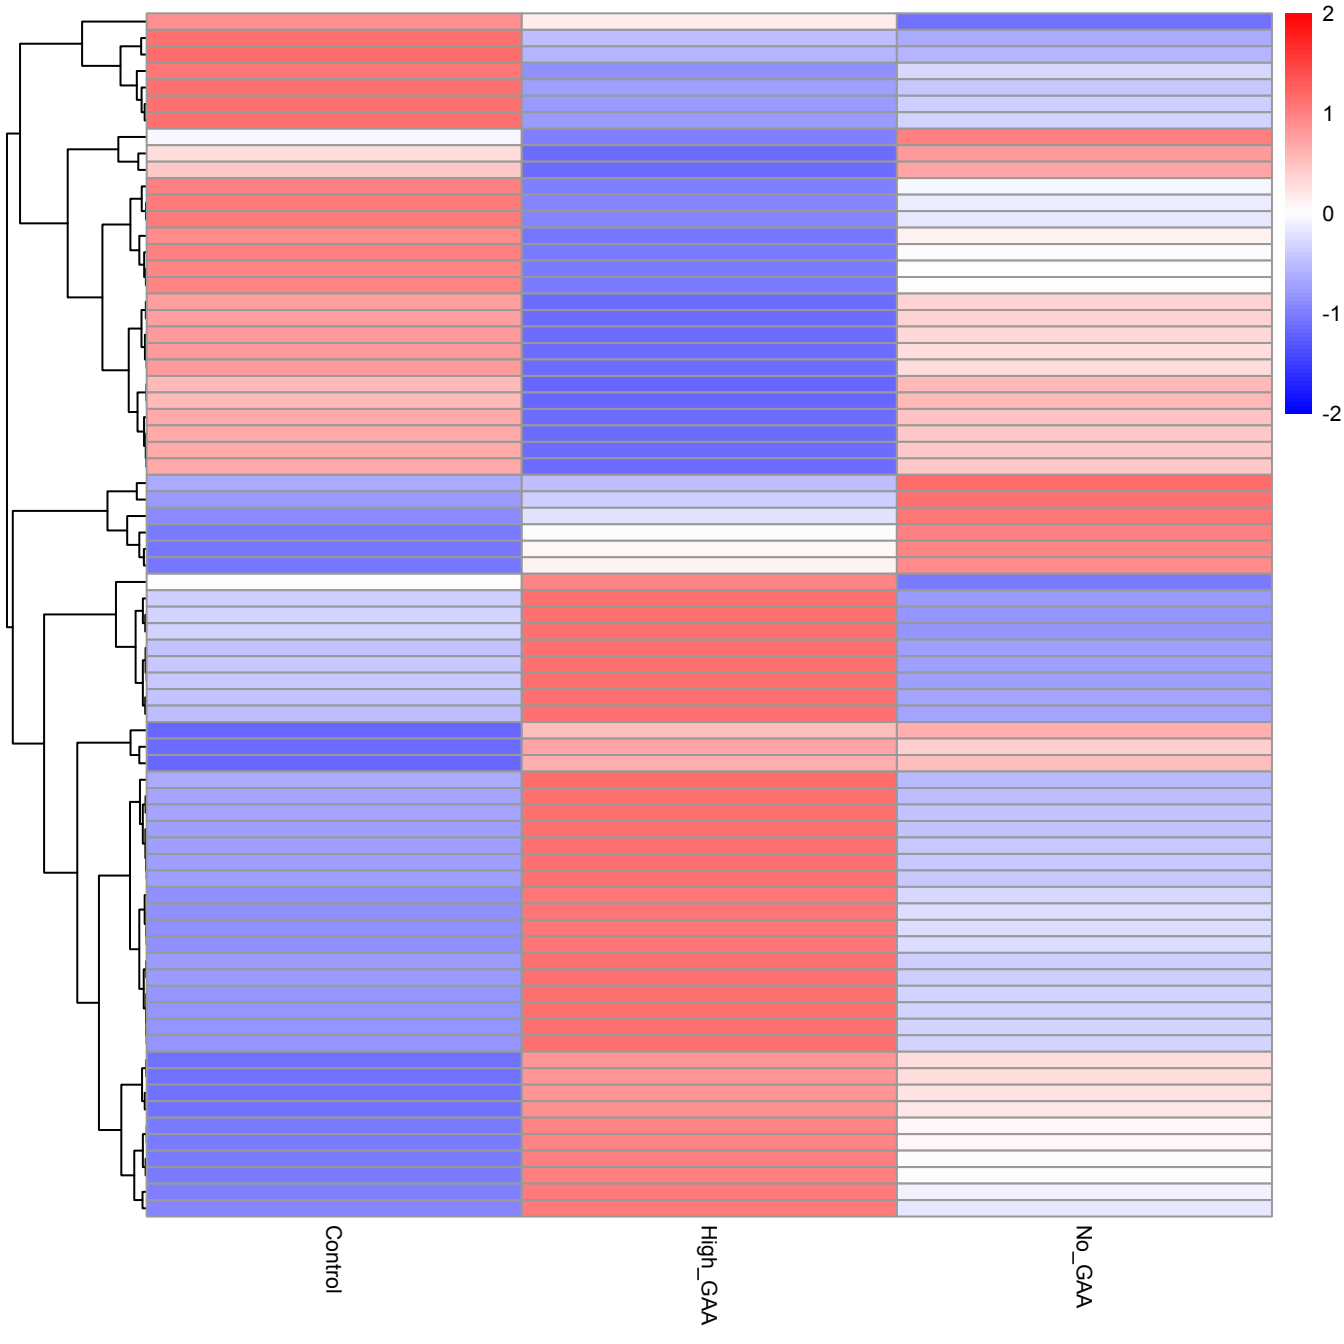

Supplement: Data_Sheet_1.ZIP [file Data_Sheet_1.ZIP]

High\_GAA.vs.No\_GAA

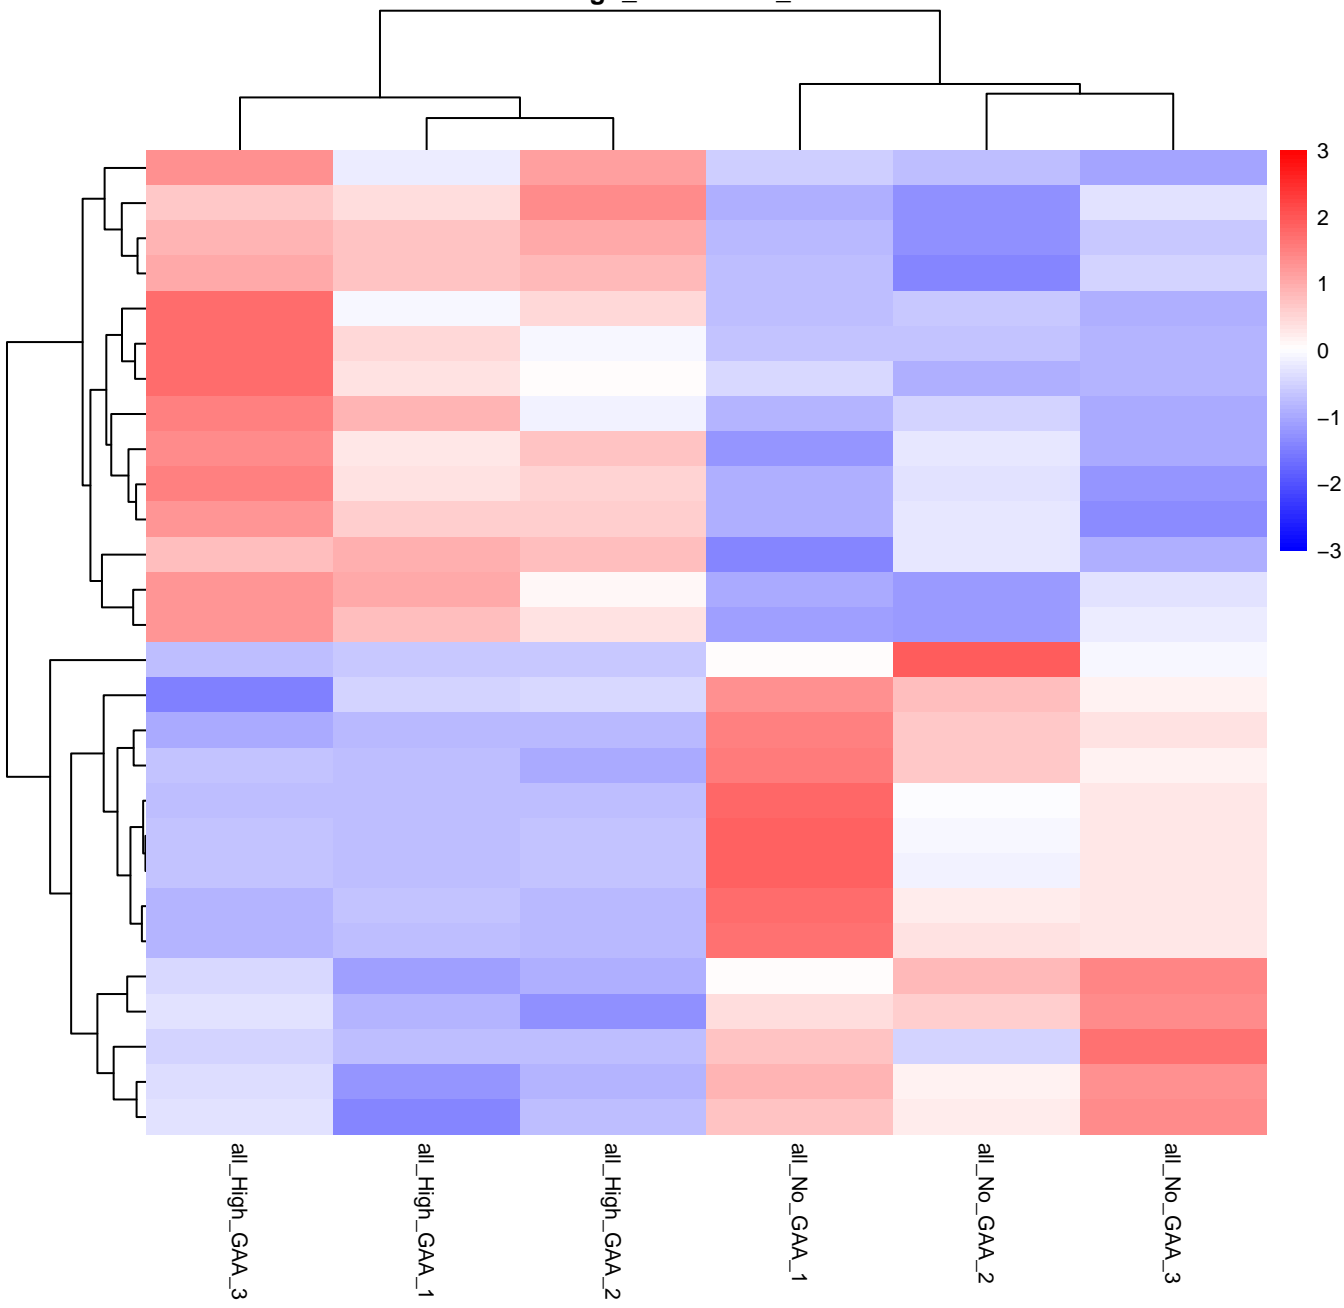

Supplement: Data_Sheet_1.ZIP [file Data_Sheet_1.ZIP]

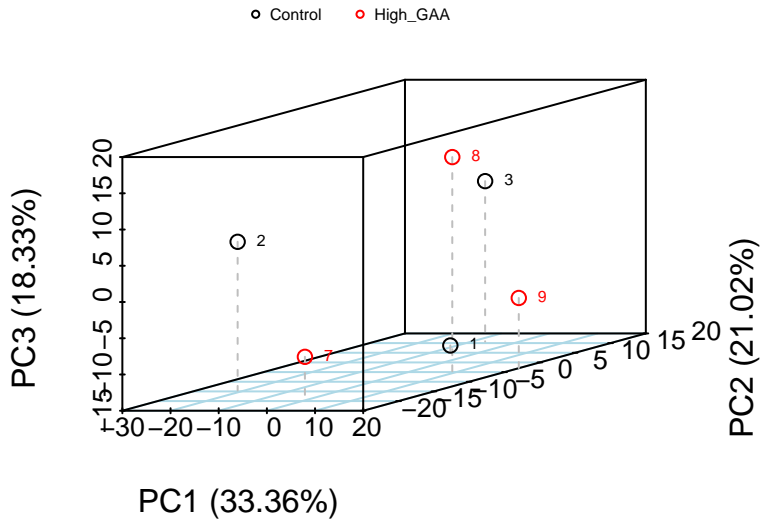

Supplement: Data_Sheet_1.ZIP [file Data_Sheet_1.ZIP]

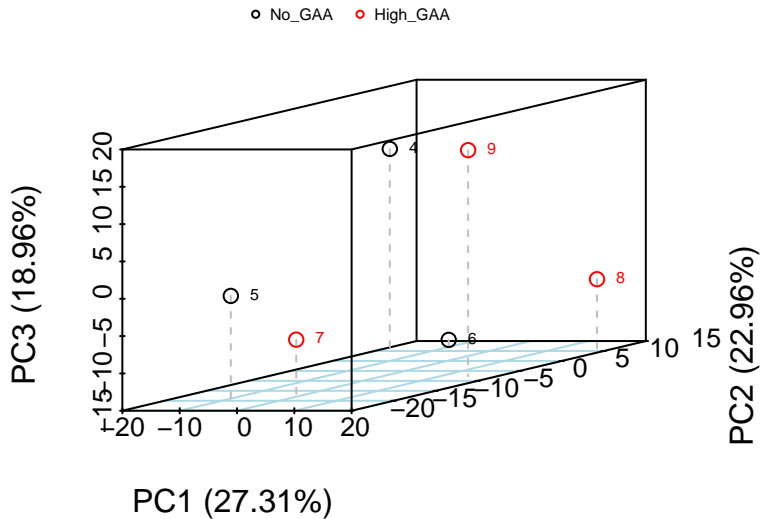

Supplement: Data_Sheet_1.ZIP [file Data_Sheet_1.ZIP]

High\_GAA.vs.Control

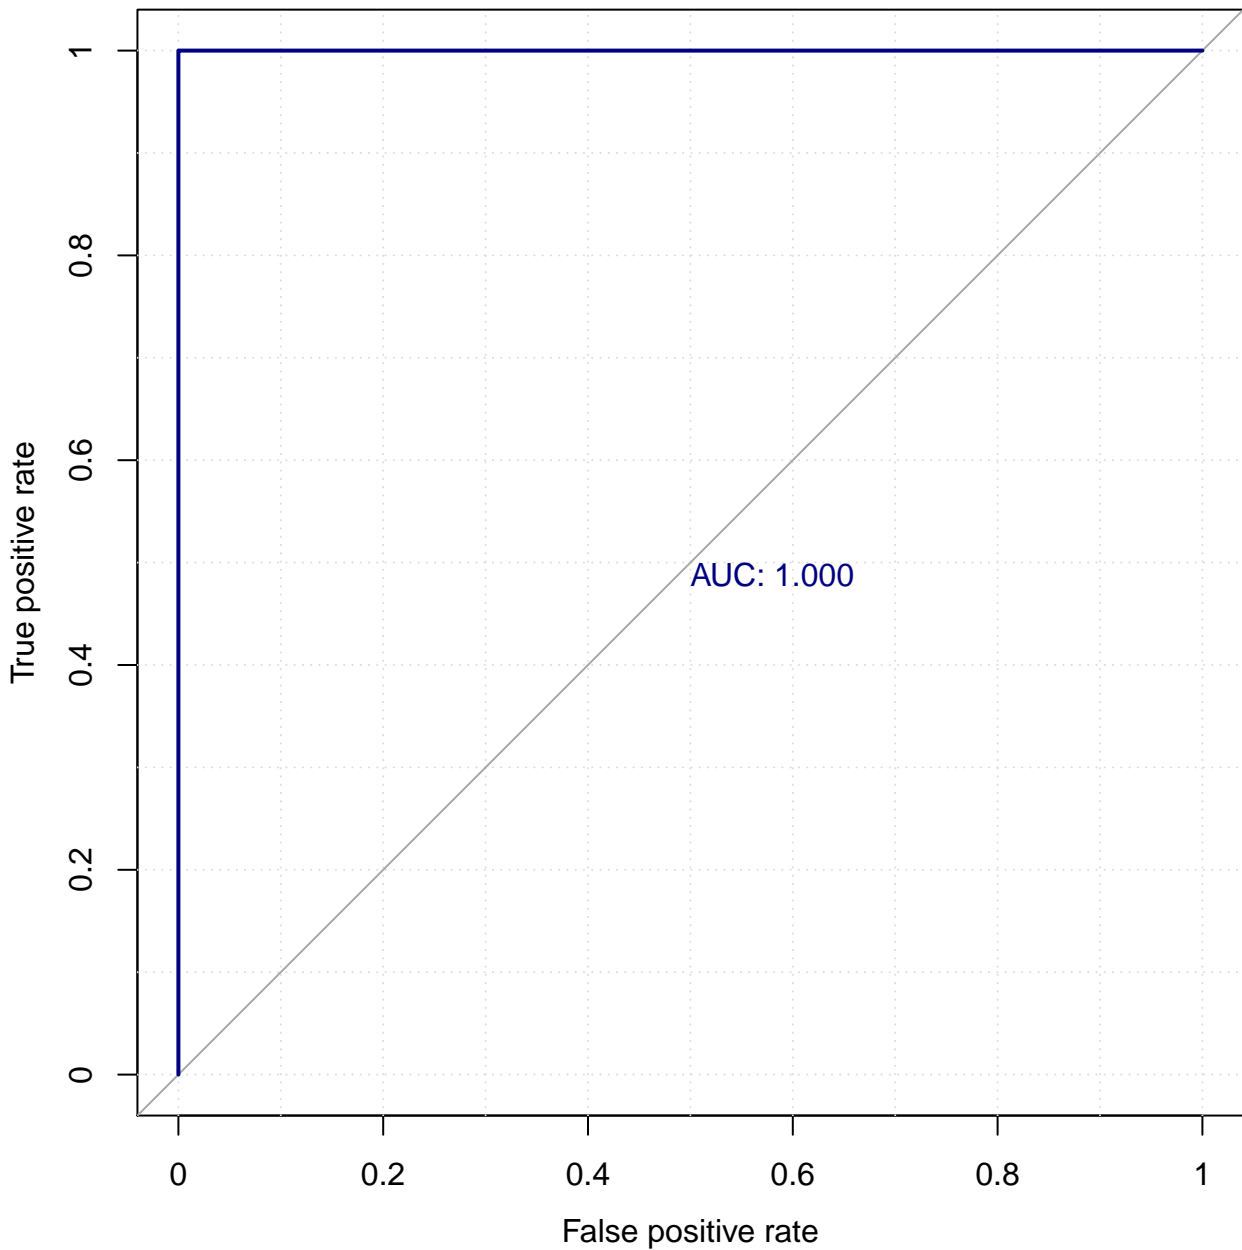

Supplement: Data_Sheet_1.ZIP [file Data_Sheet_1.ZIP]

High\_GAA.vs.No\_GAA

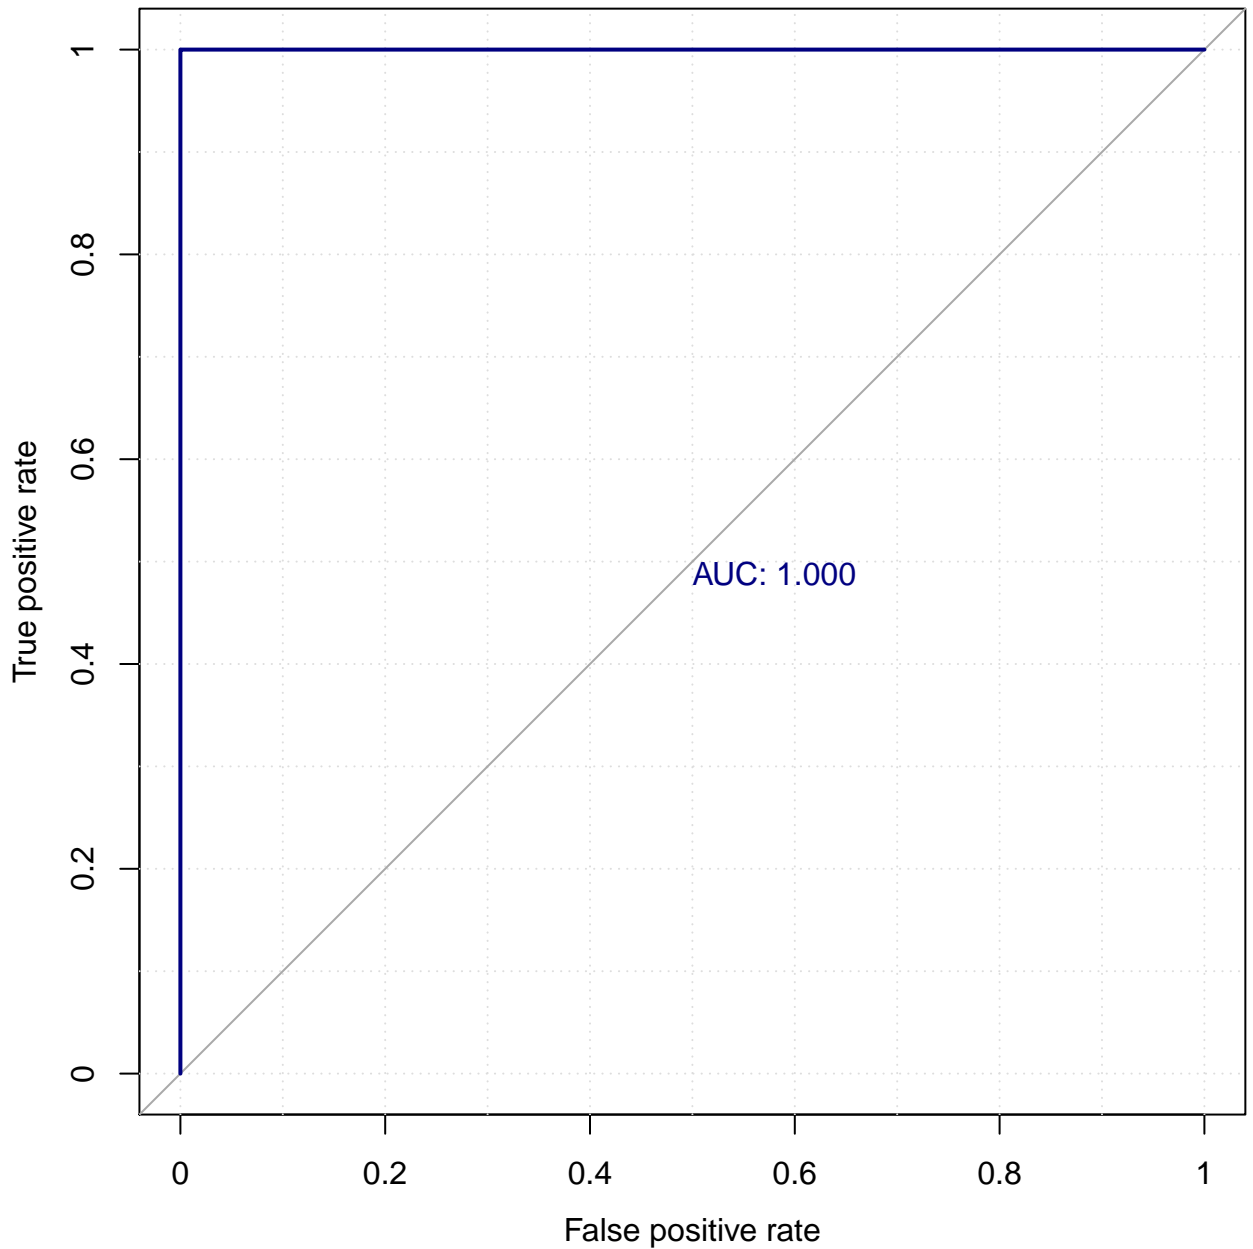

Supplement: Data_Sheet_1.ZIP [file Data_Sheet_1.ZIP]

# High\_GAA.vs.Control\_all

Terms

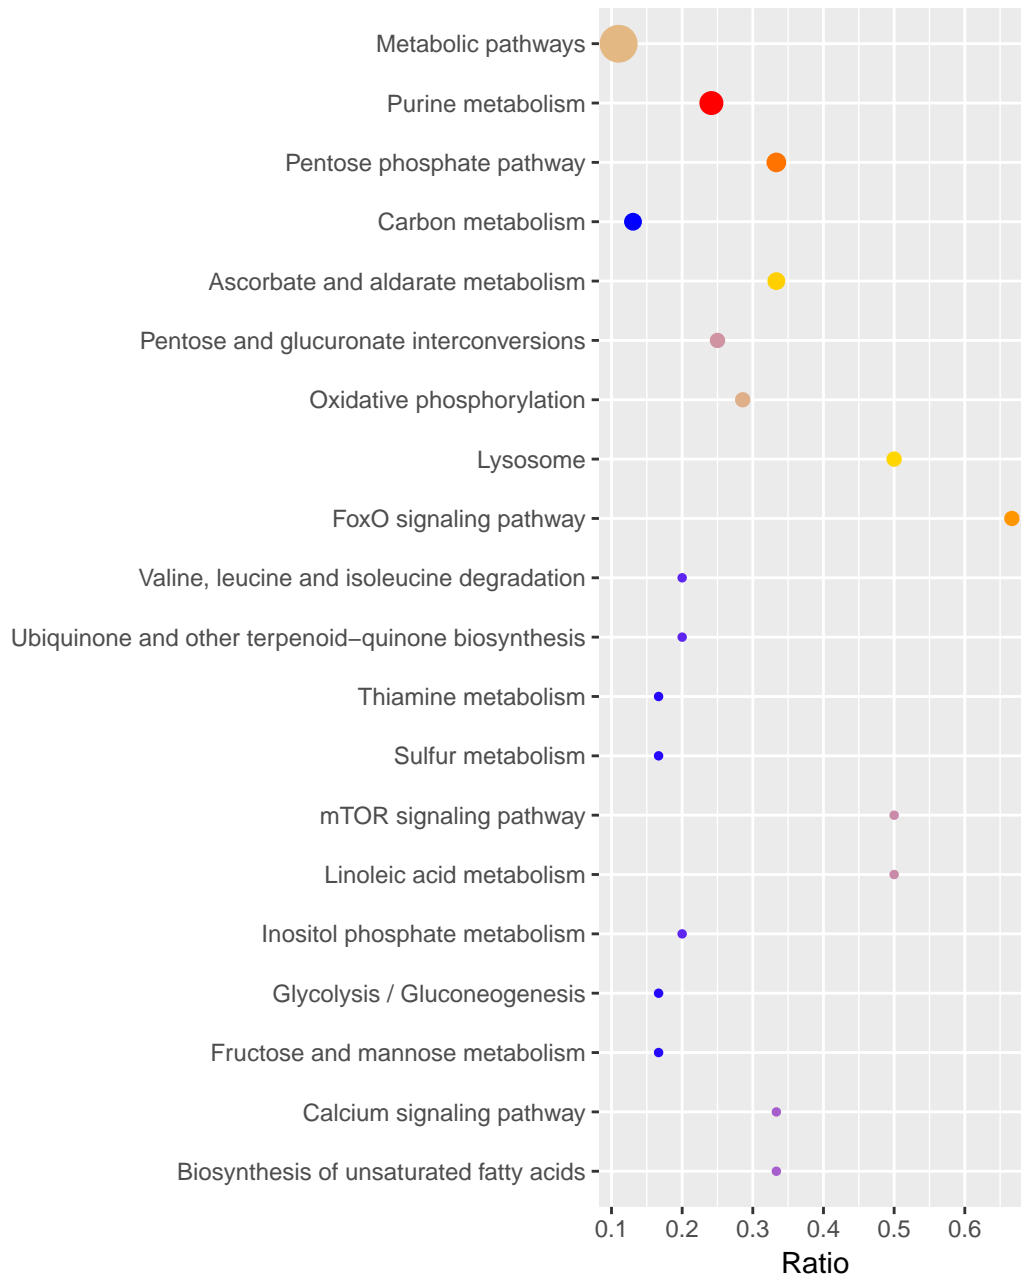

$-\log_{10}(\text{Pvalue})$

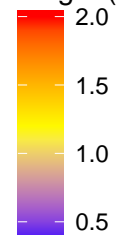

Number

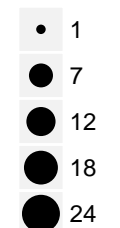

Supplement: Data_Sheet_1.ZIP [file Data_Sheet_1.ZIP]

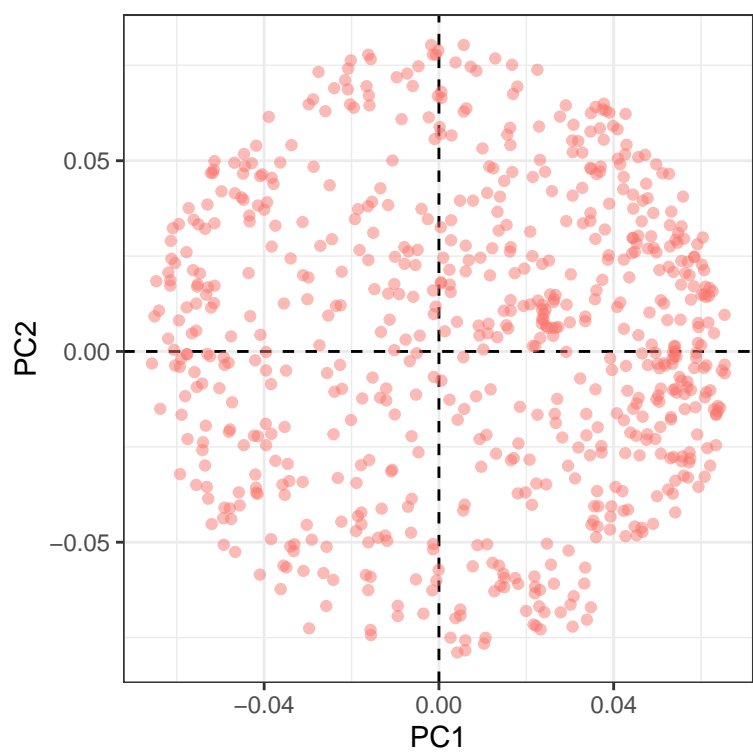

Supplement: Data_Sheet_1.ZIP [file Data_Sheet_1.ZIP]

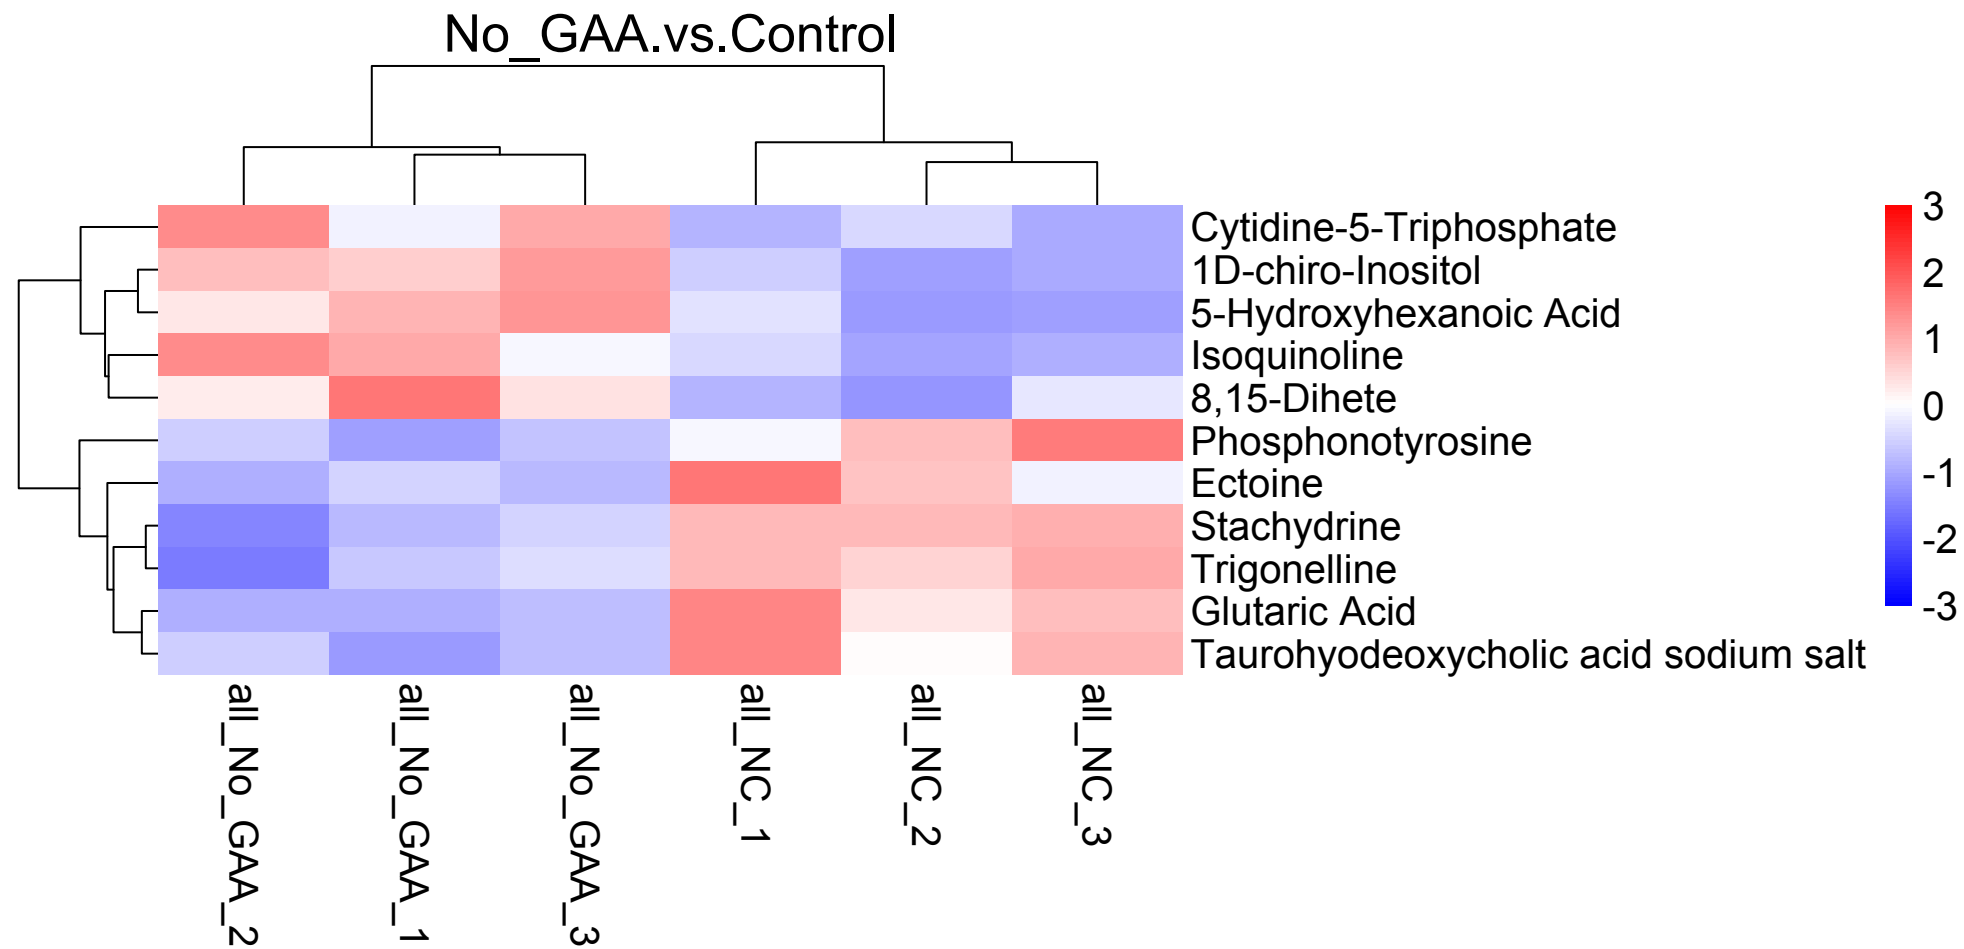

Supplement: Data_Sheet_1.ZIP [file Data_Sheet_1.ZIP]

High\_GAA.vs.Control

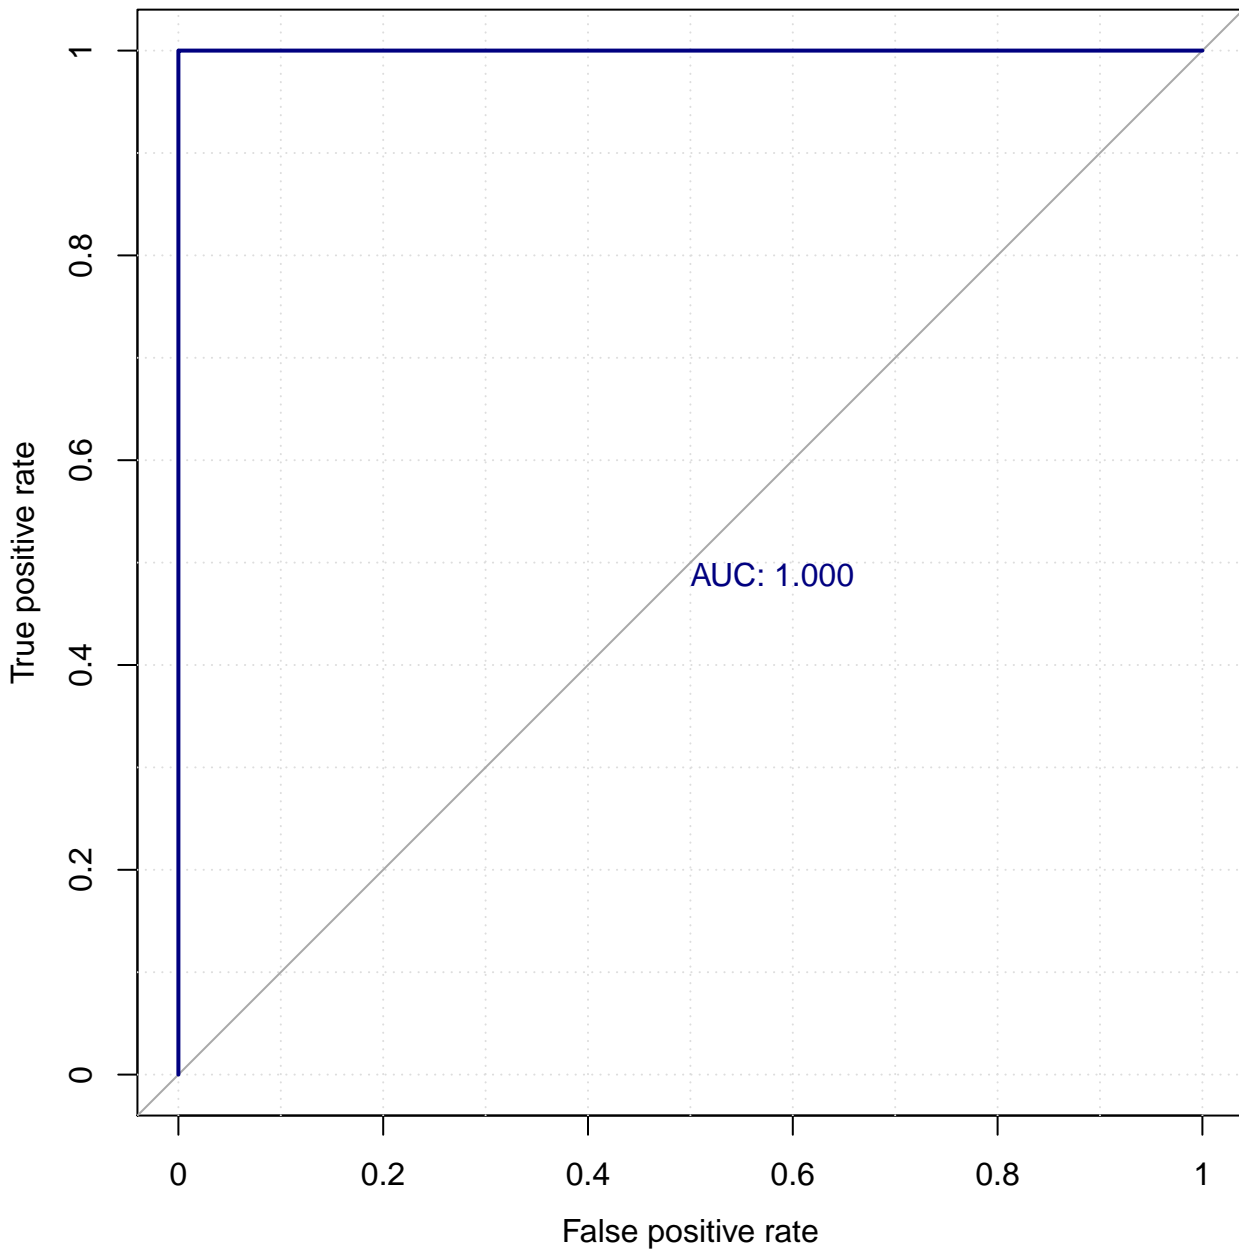

Supplement: Data_Sheet_1.ZIP [file Data_Sheet_1.ZIP]

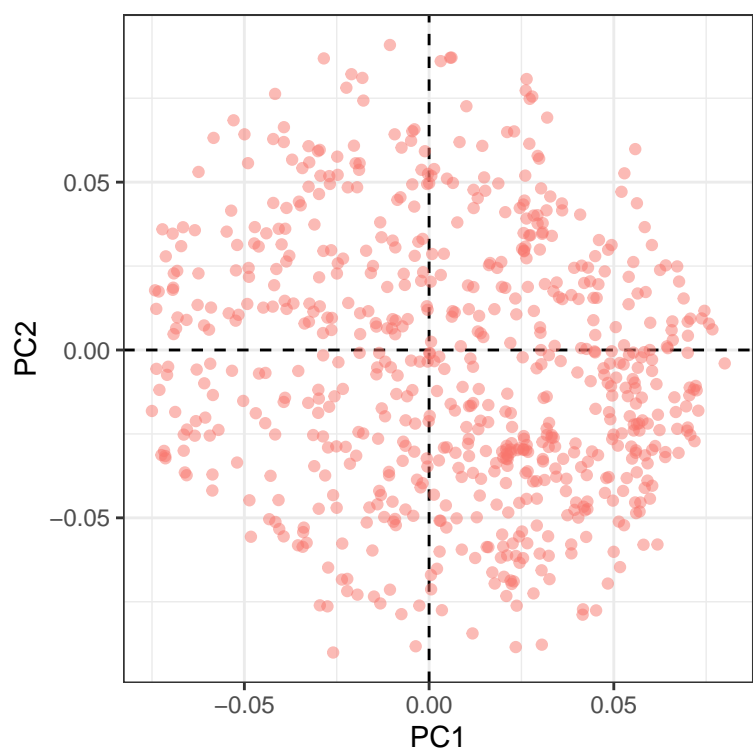

Supplement: Data_Sheet_1.ZIP [file Data_Sheet_1.ZIP]

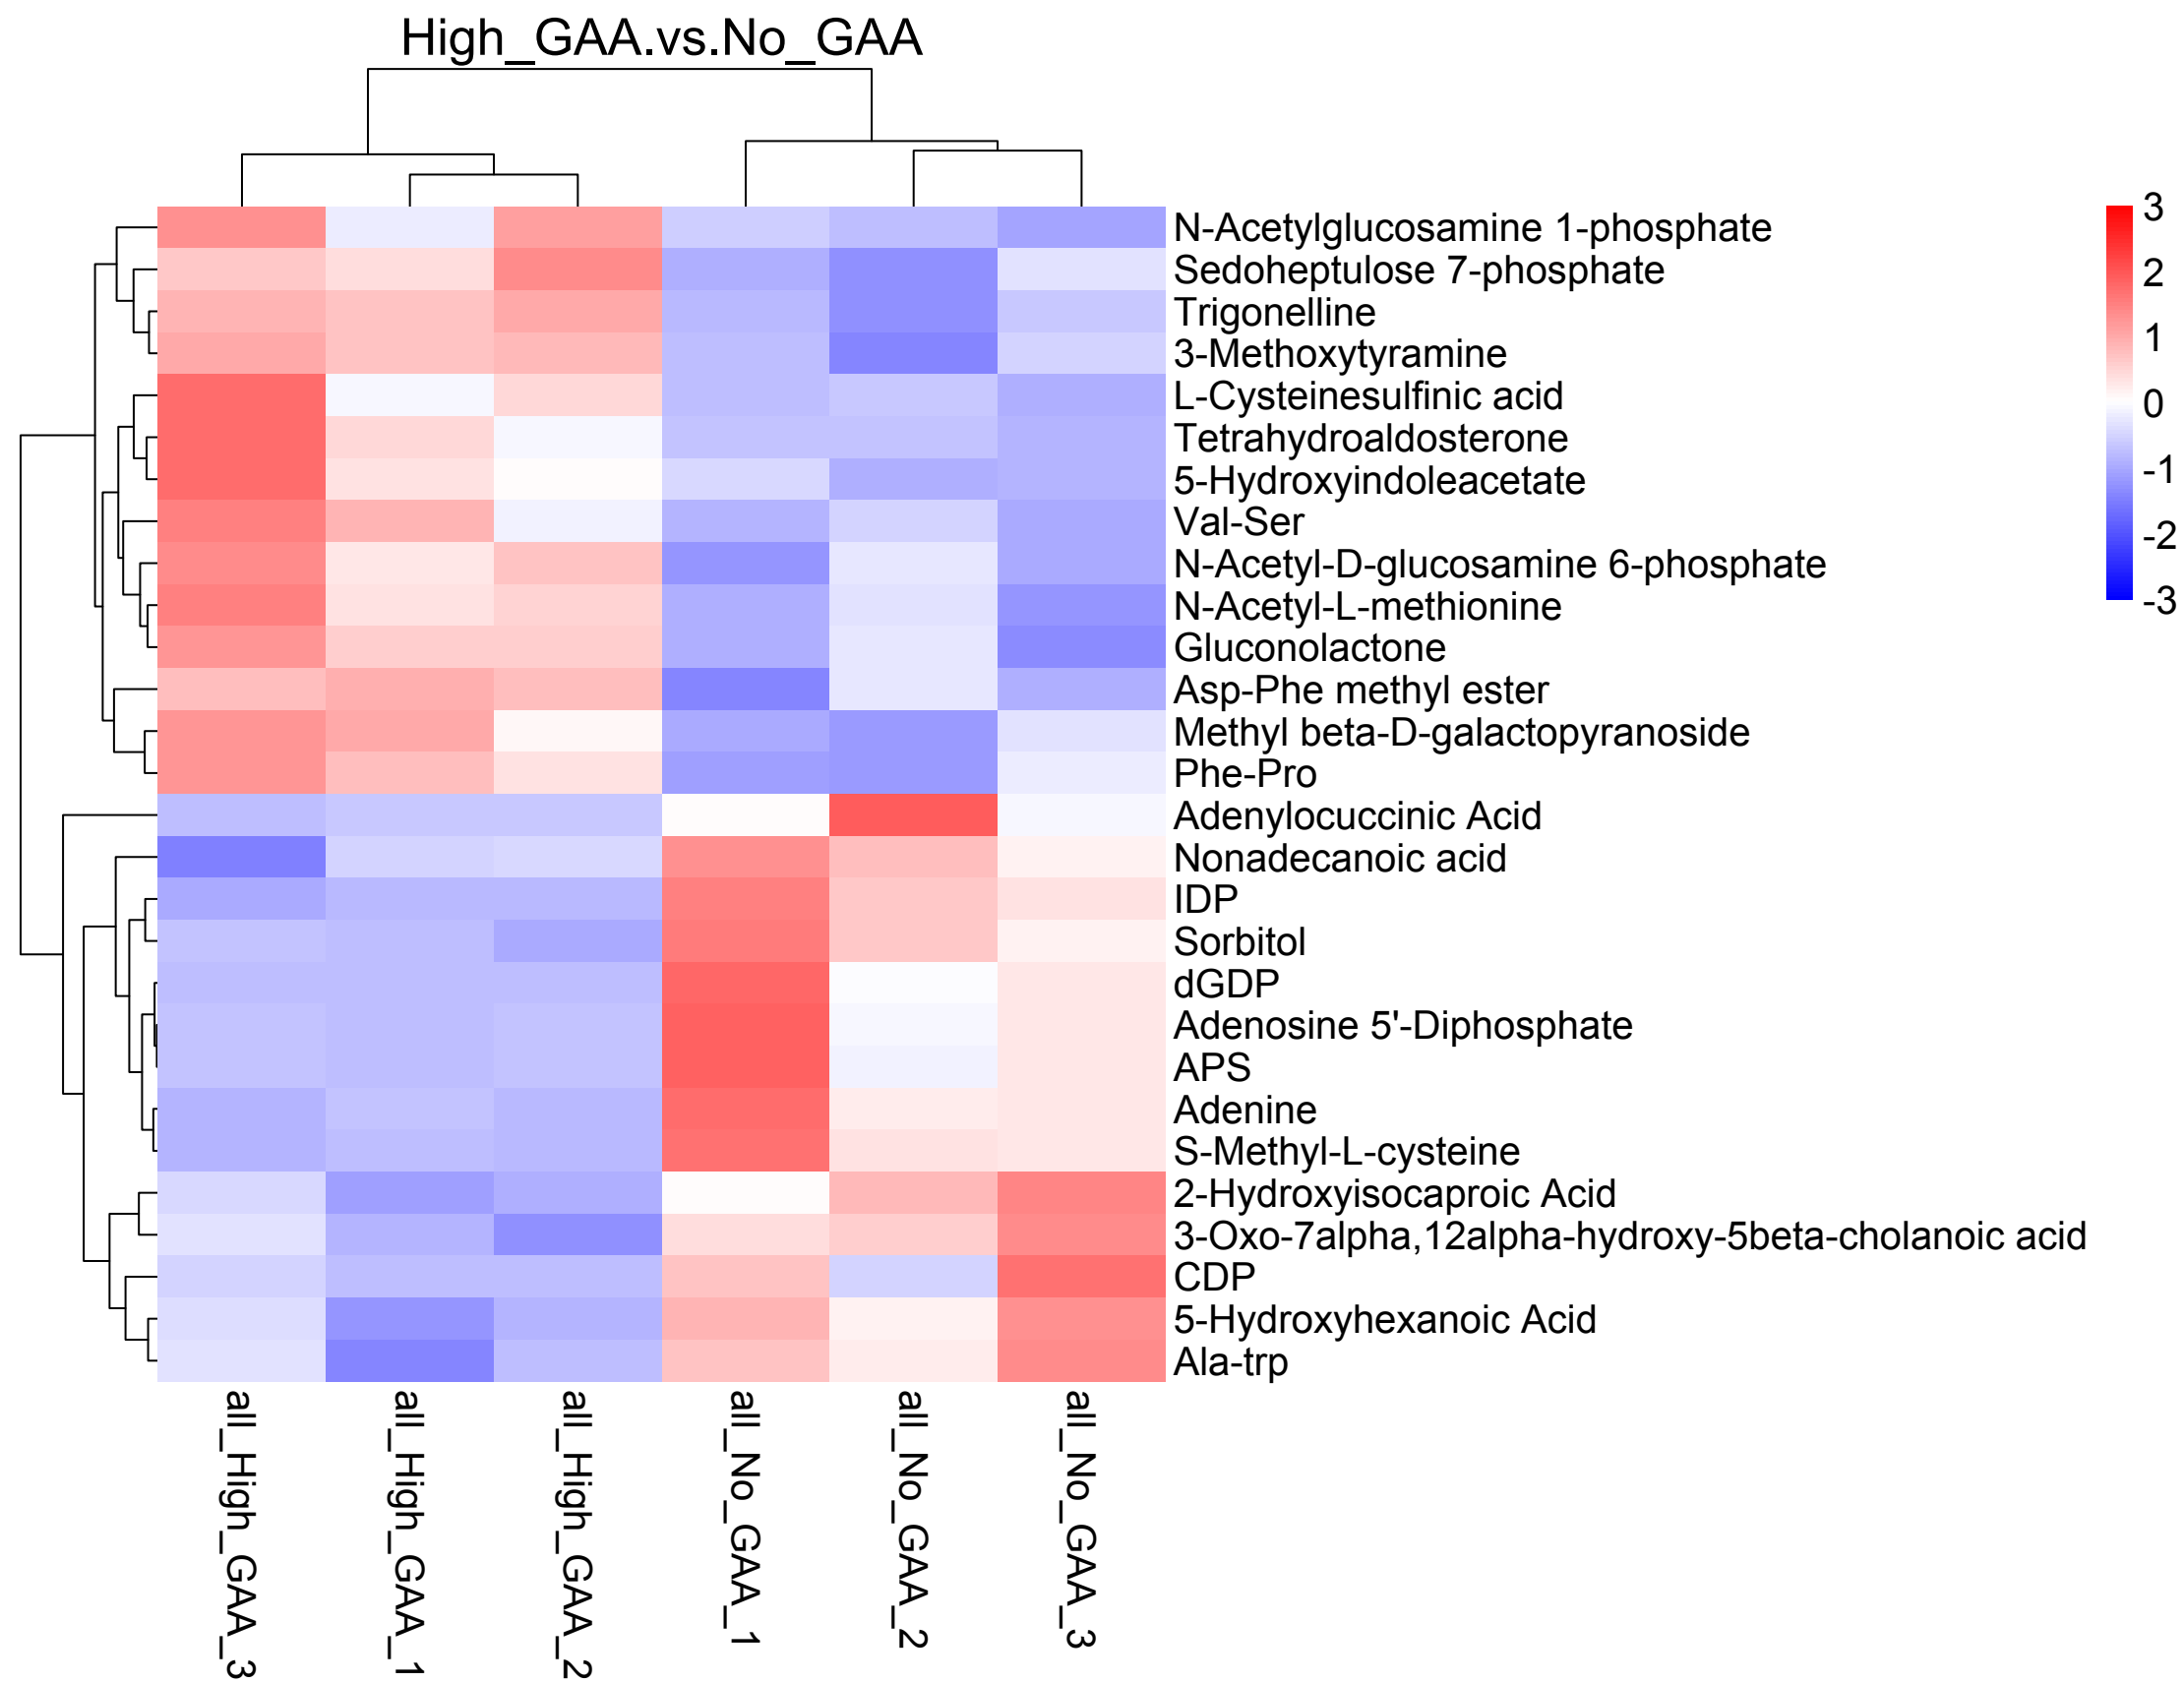

Supplement: Data_Sheet_1.ZIP [file Data_Sheet_1.ZIP]

No\_GAA.vs.Control

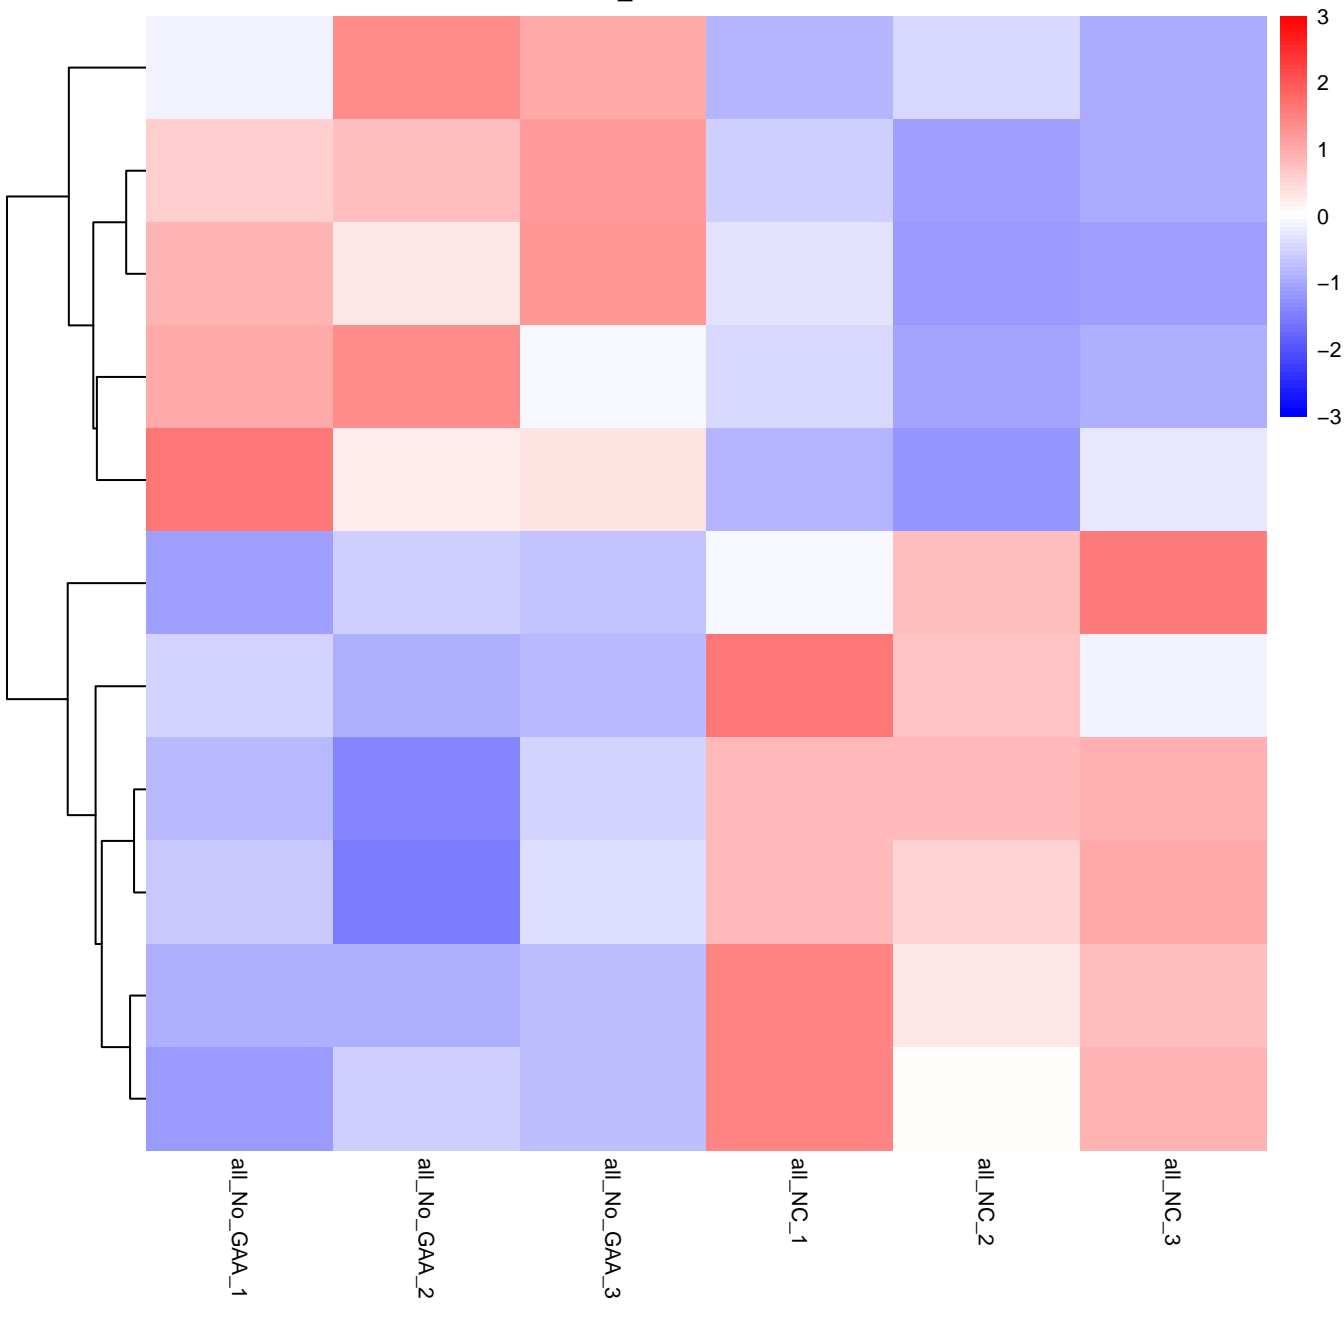

Supplement: Data_Sheet_1.ZIP [file Data_Sheet_1.ZIP]

No\_GAA.vs.Control



Supplement: Data_Sheet_1.ZIP [file Data_Sheet_1.ZIP]

class     High\_GAA     No\_GAA

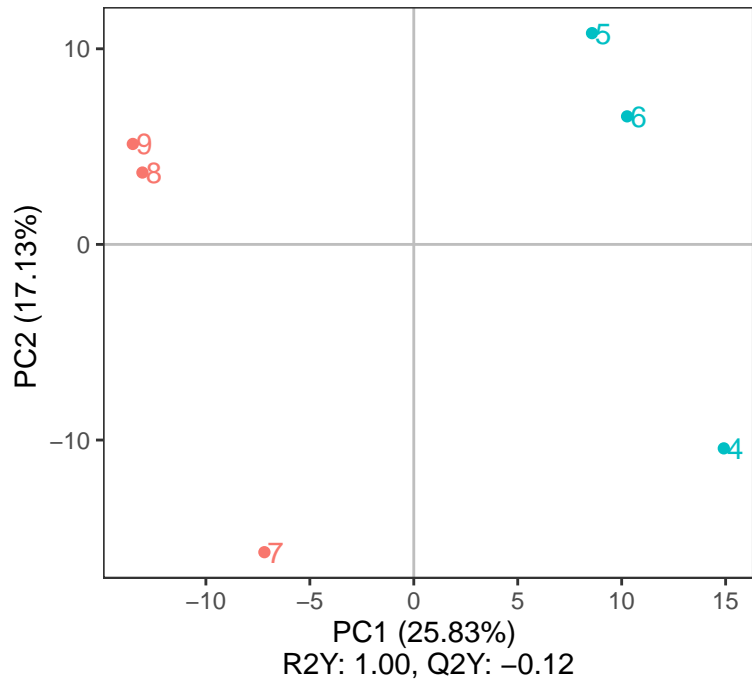

Supplement: Data_Sheet_1.ZIP [file Data_Sheet_1.ZIP]

# High\_GAA.vs.No\_GAA\_all

Terms

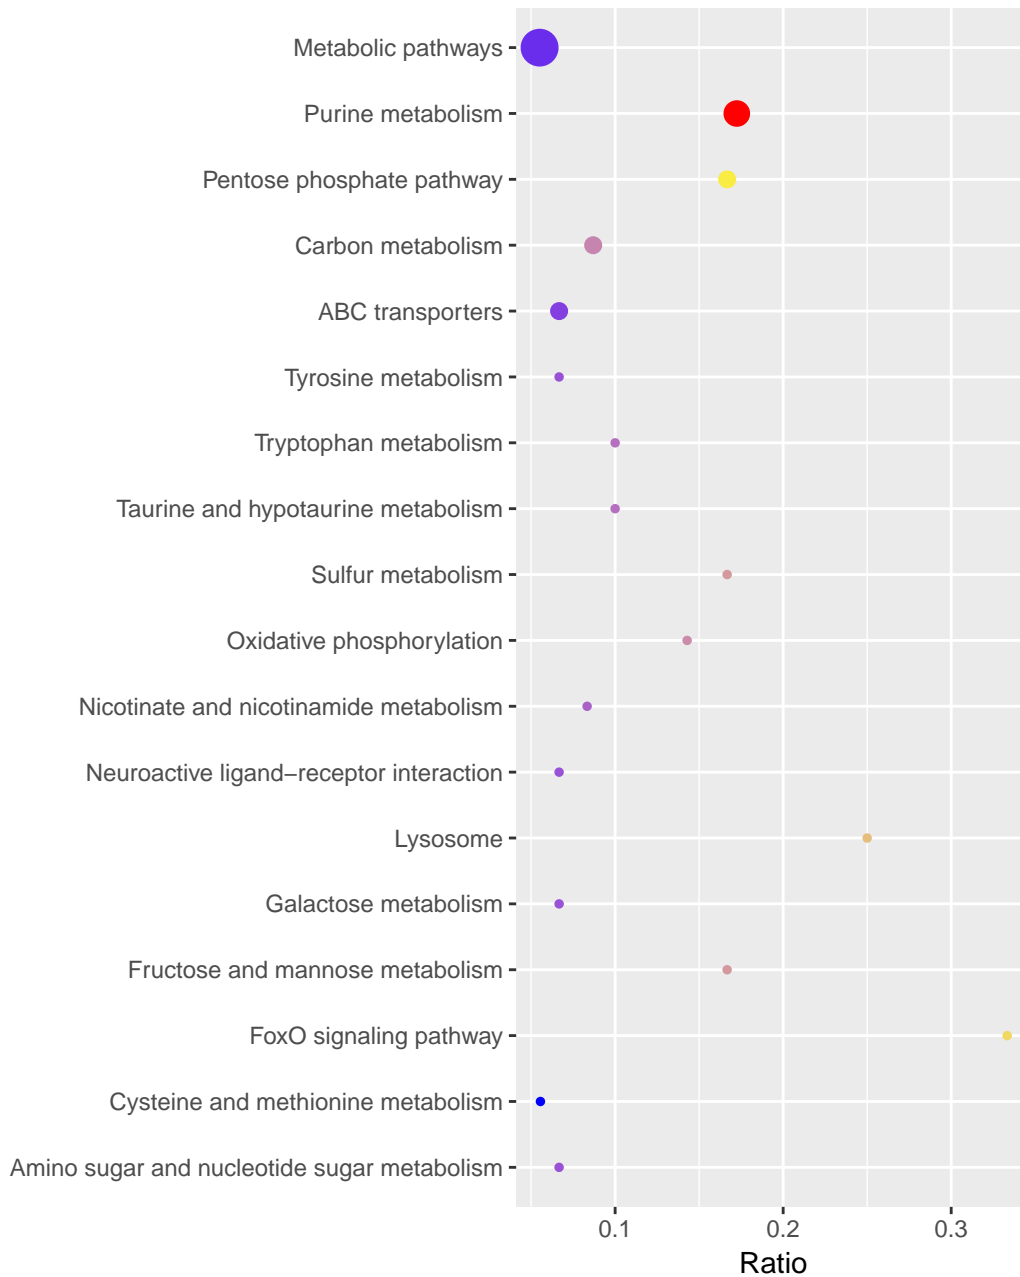

$-\log_{10}(\text{Pvalue})$

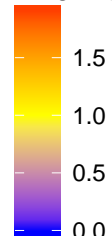

Number

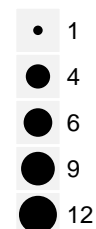

0.1

0.2

0.3

Ratio

Supplement: Data_Sheet_1.ZIP [file Data_Sheet_1.ZIP]

# High\_GAA.vs.No\_GAA

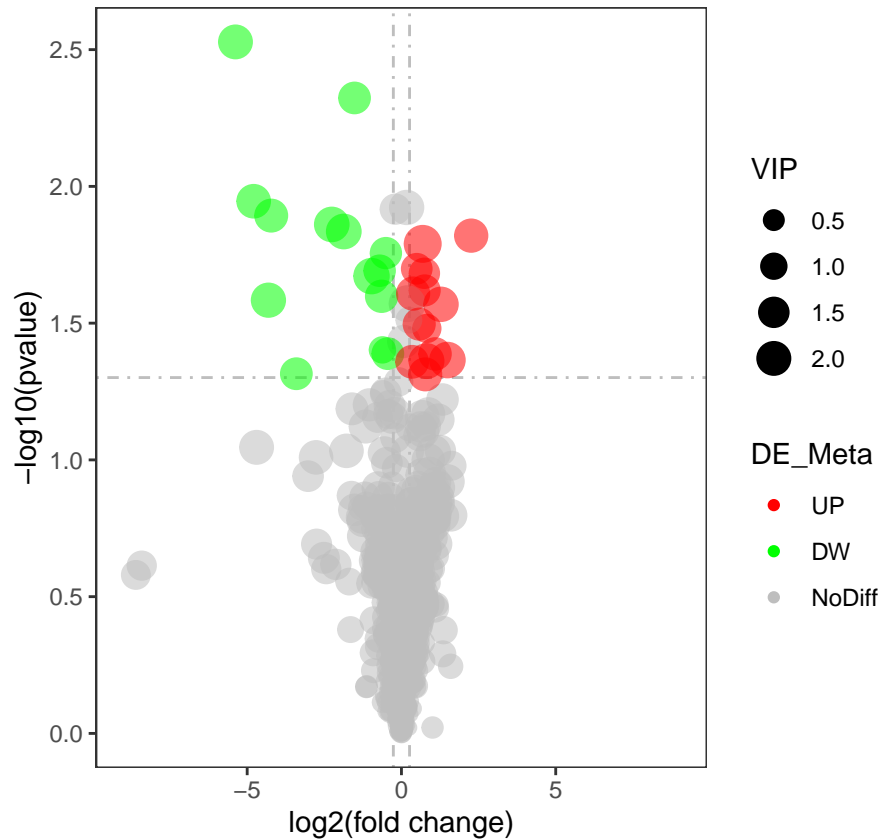

Supplement: Data_Sheet_1.ZIP [file Data_Sheet_1.ZIP]

# High\_GAA.vs.Control

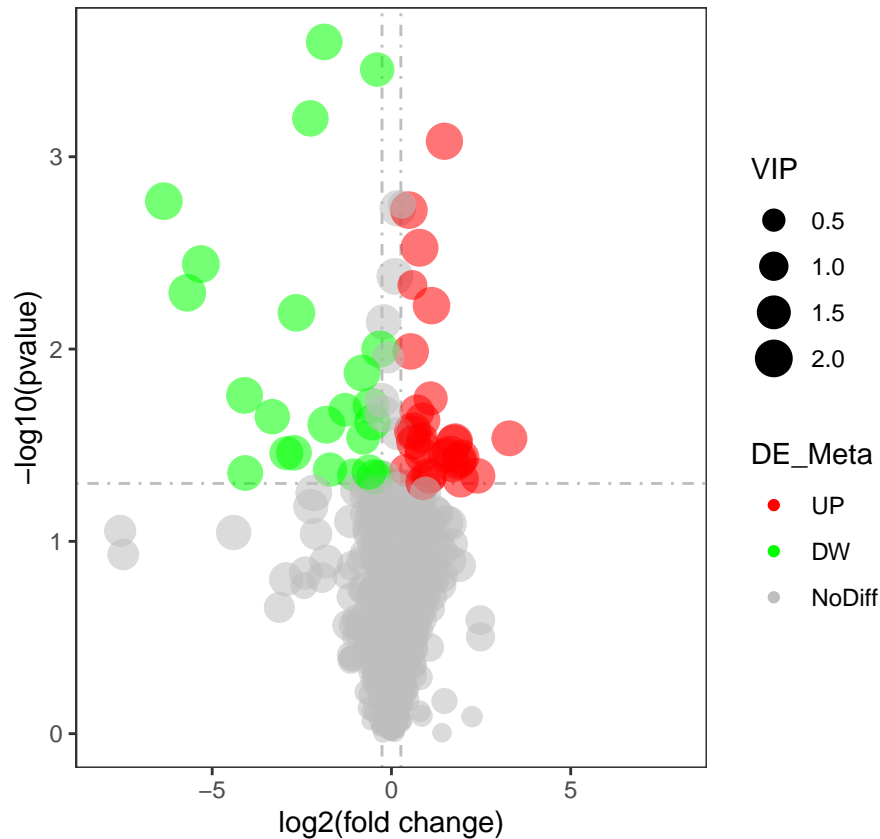

Supplement: Data_Sheet_1.ZIP [file Data_Sheet_1.ZIP]

High\_GAA.vs.No\_GAA

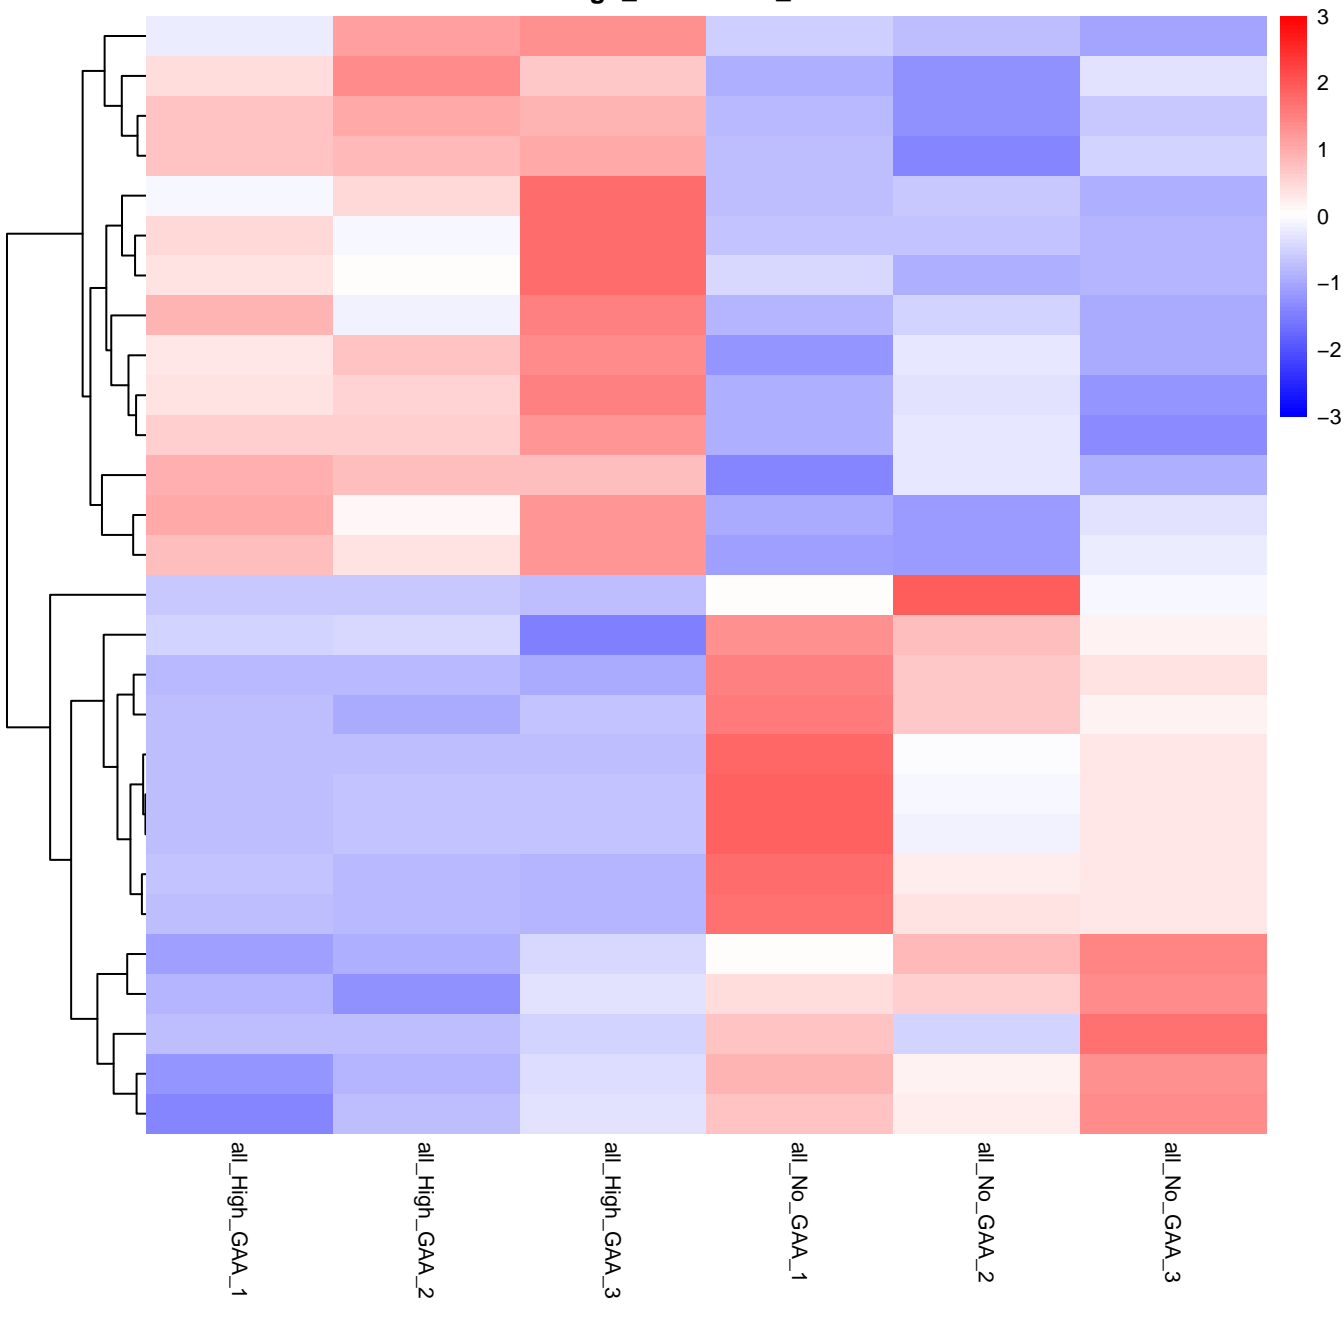

Supplement: Data_Sheet_1.ZIP [file Data_Sheet_1.ZIP]

PC2 (15.52%)

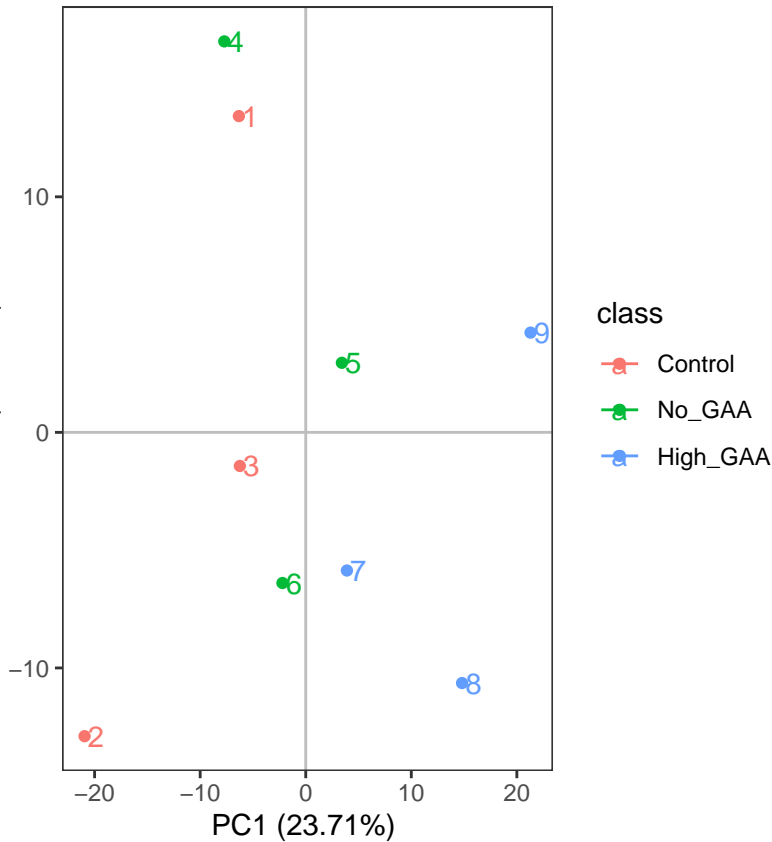

Supplement: Data_Sheet_1.ZIP [file Data_Sheet_1.ZIP]

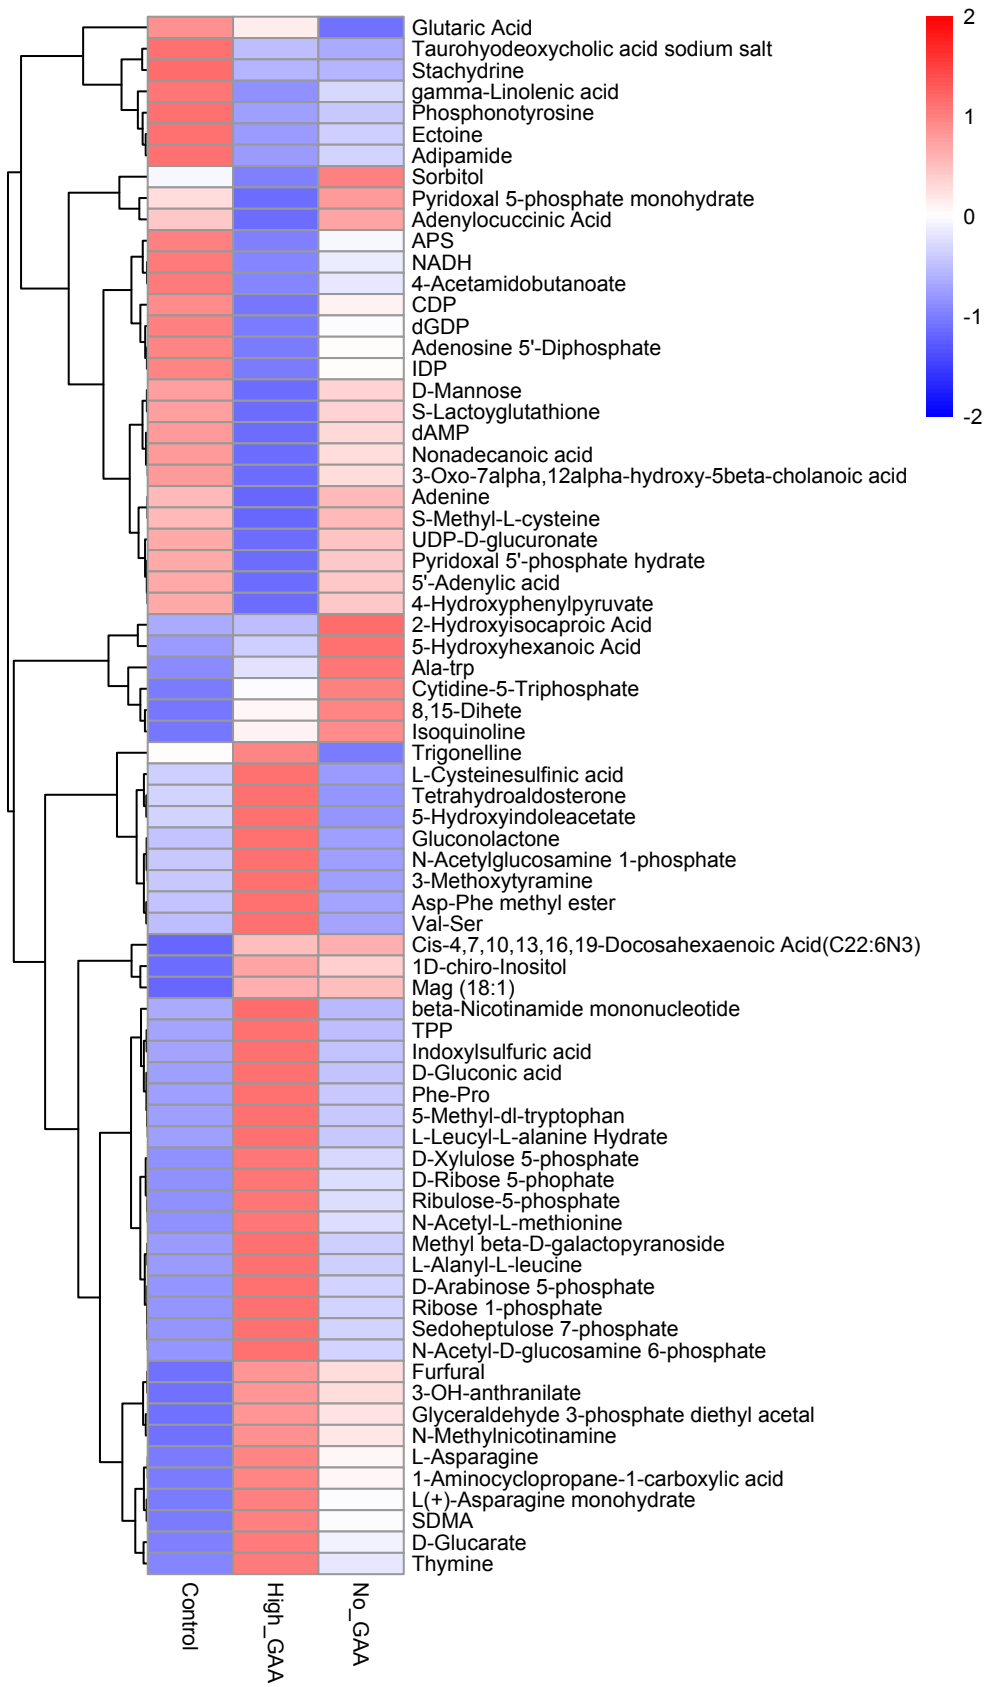

Supplement: Data_Sheet_1.ZIP [file Data_Sheet_1.ZIP]

No\_GAA.vs.Control

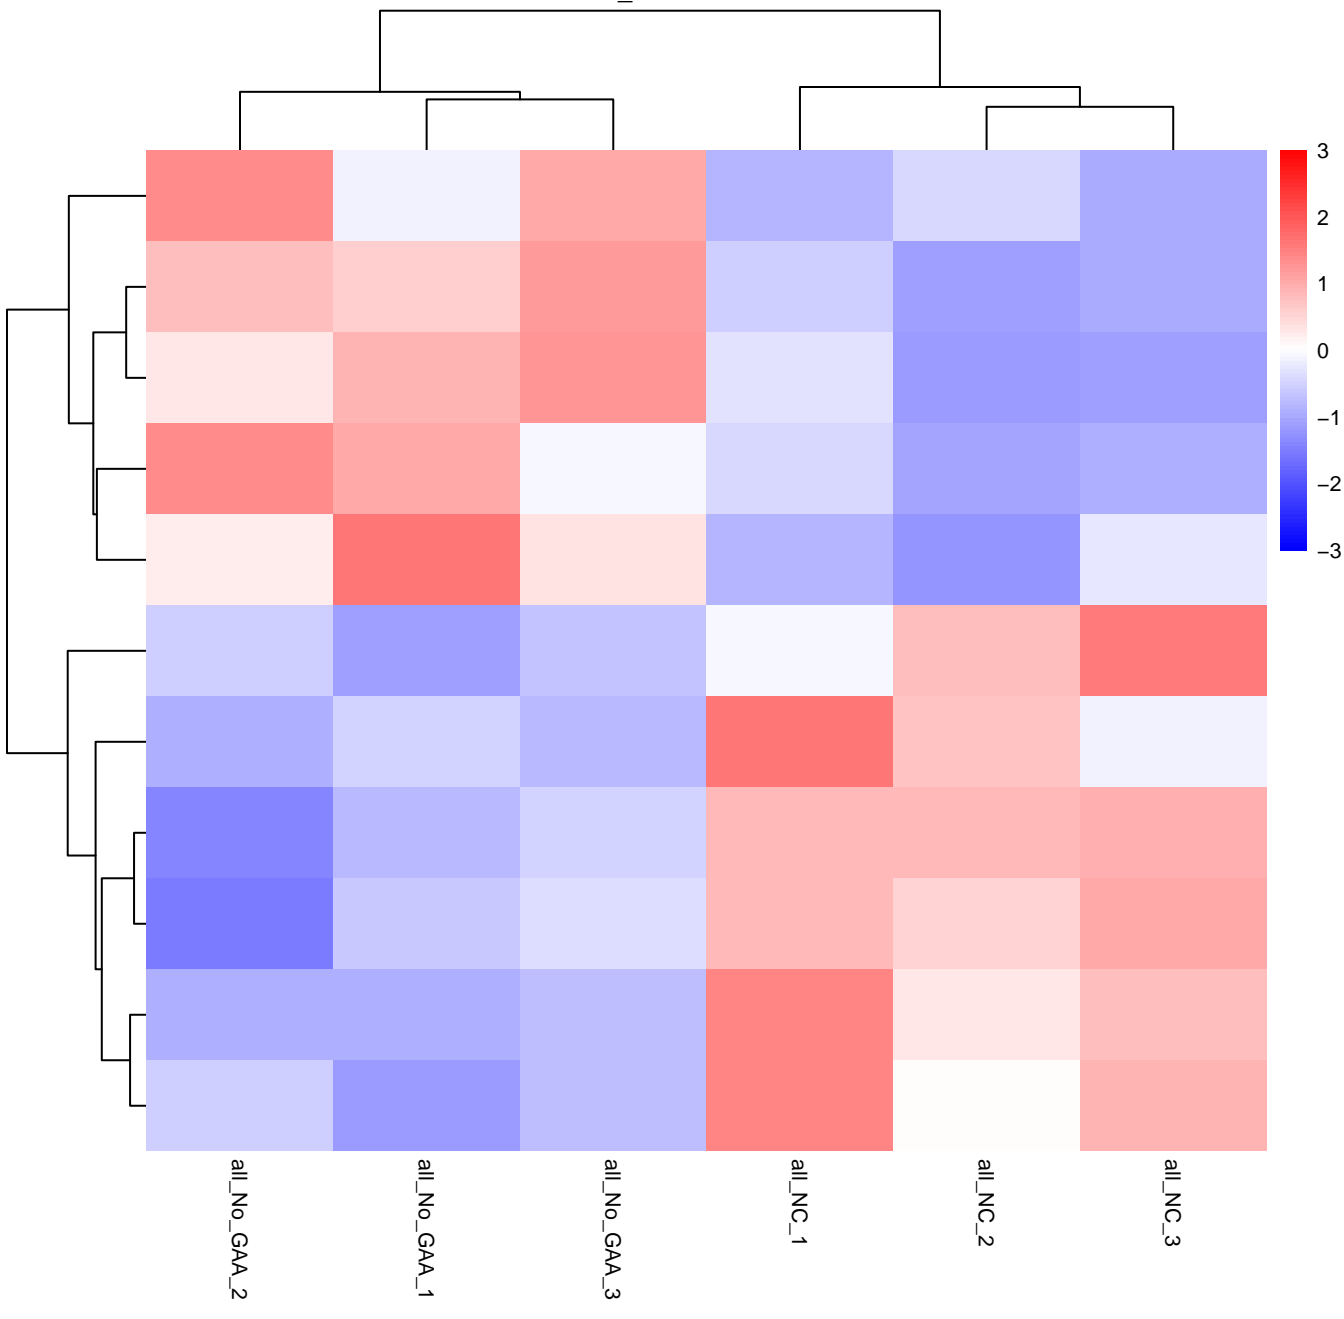

Supplement: Data_Sheet_1.ZIP [file Data_Sheet_1.ZIP]

High\_GAA.vs.Control



Supplement: Data_Sheet_1.ZIP [file Data_Sheet_1.ZIP]

High\_GAA.vs.Control



Supplement: Data_Sheet_1.ZIP [file Data_Sheet_1.ZIP]

High\_GAA.vs.Control



Supplement: Data_Sheet_1.ZIP [file Data_Sheet_1.ZIP]

# No\_GAA.vs.Control

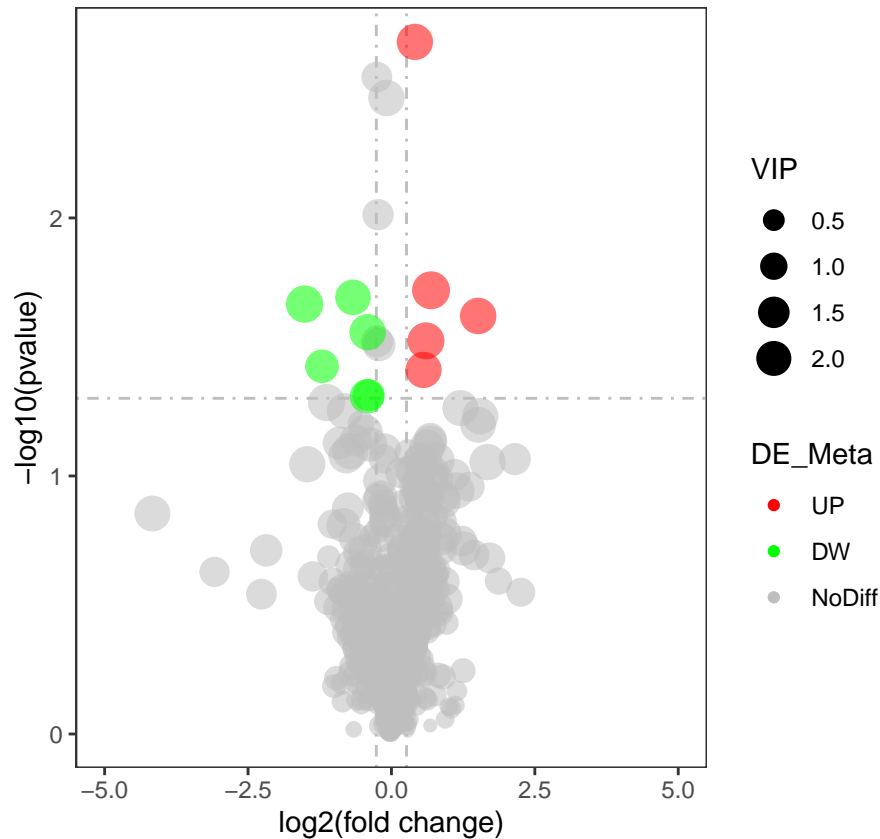

Supplement: Data_Sheet_1.ZIP [file Data_Sheet_1.ZIP]

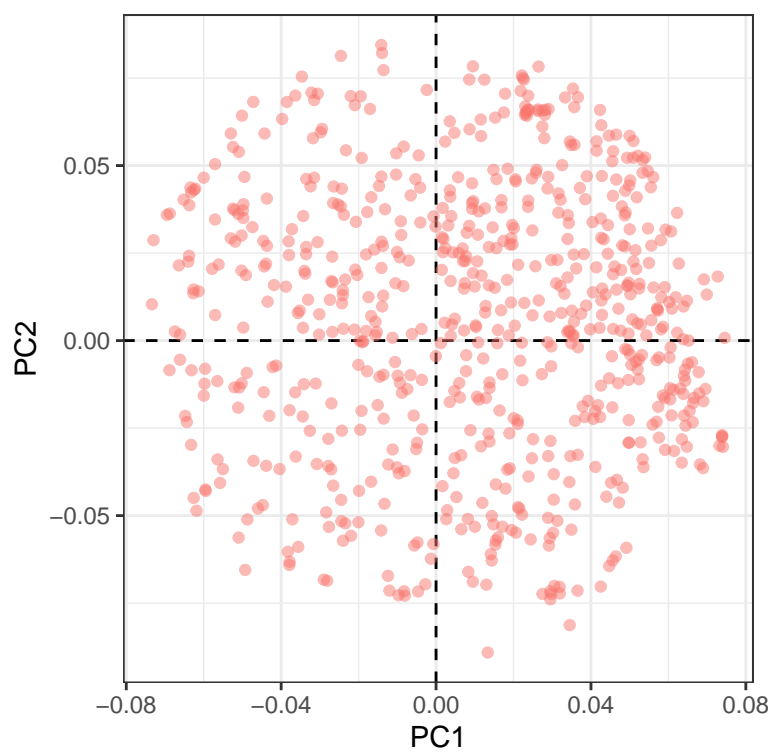

Supplement: Data_Sheet_1.ZIP [file Data_Sheet_1.ZIP]

No\_GAA.vs.Control



Supplement: Data_Sheet_1.ZIP [file Data_Sheet_1.ZIP]

High\_GAA.vs.No\_GAA



Supplement: Data_Sheet_1.ZIP [file Data_Sheet_1.ZIP]

High\_GAA.vs.Control



Supplement: Data_Sheet_1.ZIP [file Data_Sheet_1.ZIP]

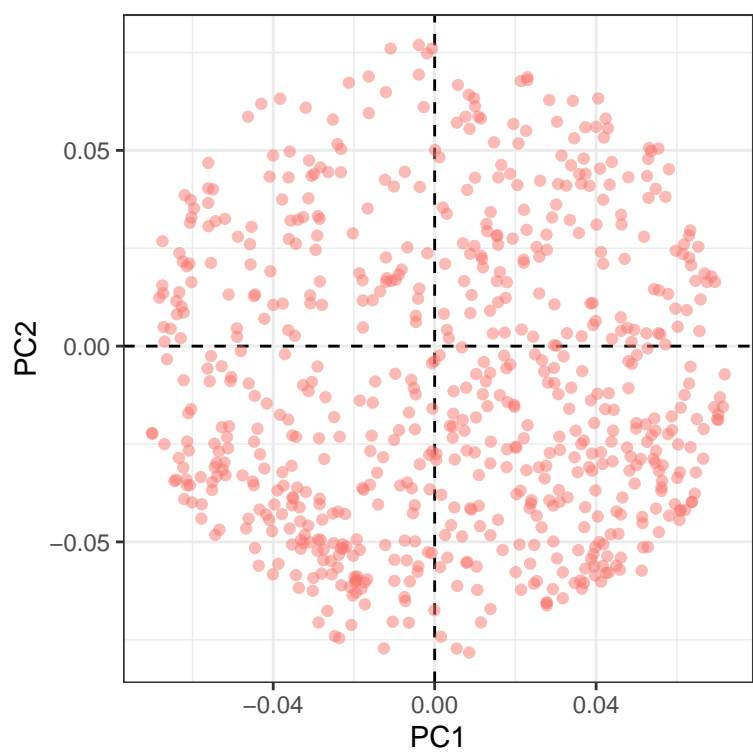

Supplement: Data_Sheet_1.ZIP [file Data_Sheet_1.ZIP]

High\_GAA\_Control  
Intercepts:  $R^2=(0.0, 0.99)$ ,  $Q^2=(0.0, -1.24)$

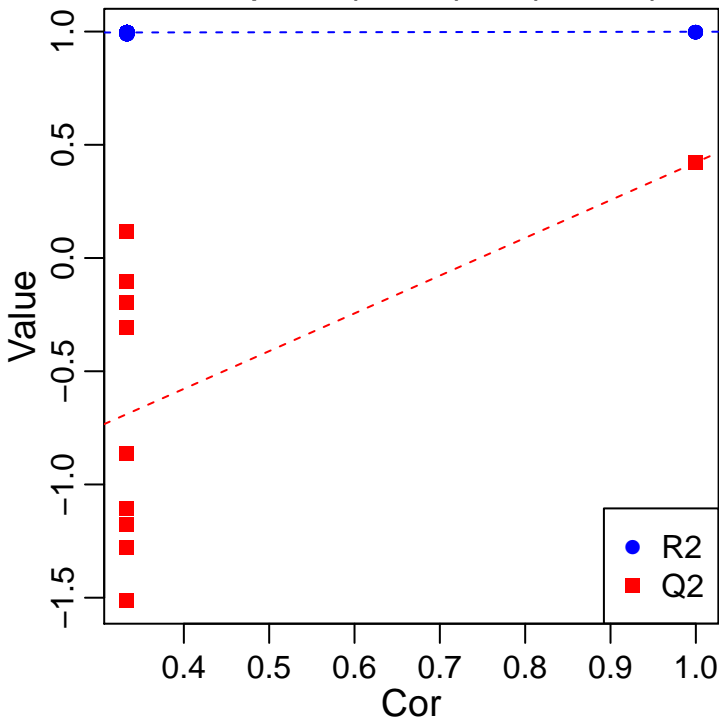

Supplement: Data_Sheet_1.ZIP [file Data_Sheet_1.ZIP]

# No\_GAA.vs.Control

Metabolites

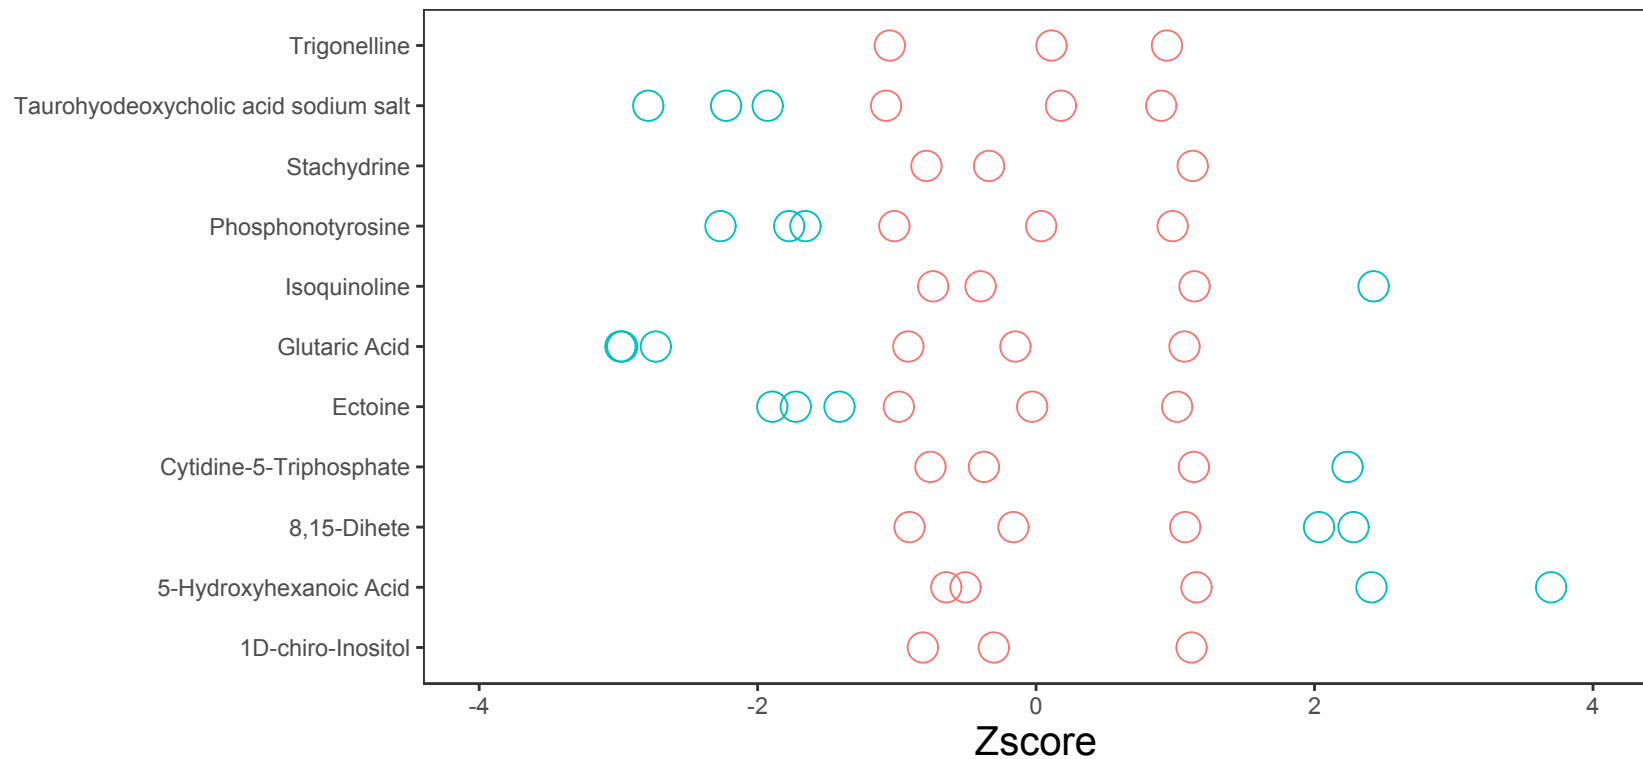

Group

Control  
No\_GAA

Supplement: Data_Sheet_1.ZIP [file Data_Sheet_1.ZIP]

No\_GAA.vs.Control



Supplement: Data_Sheet_1.ZIP [file Data_Sheet_1.ZIP]

High\_GAA.vs.Control

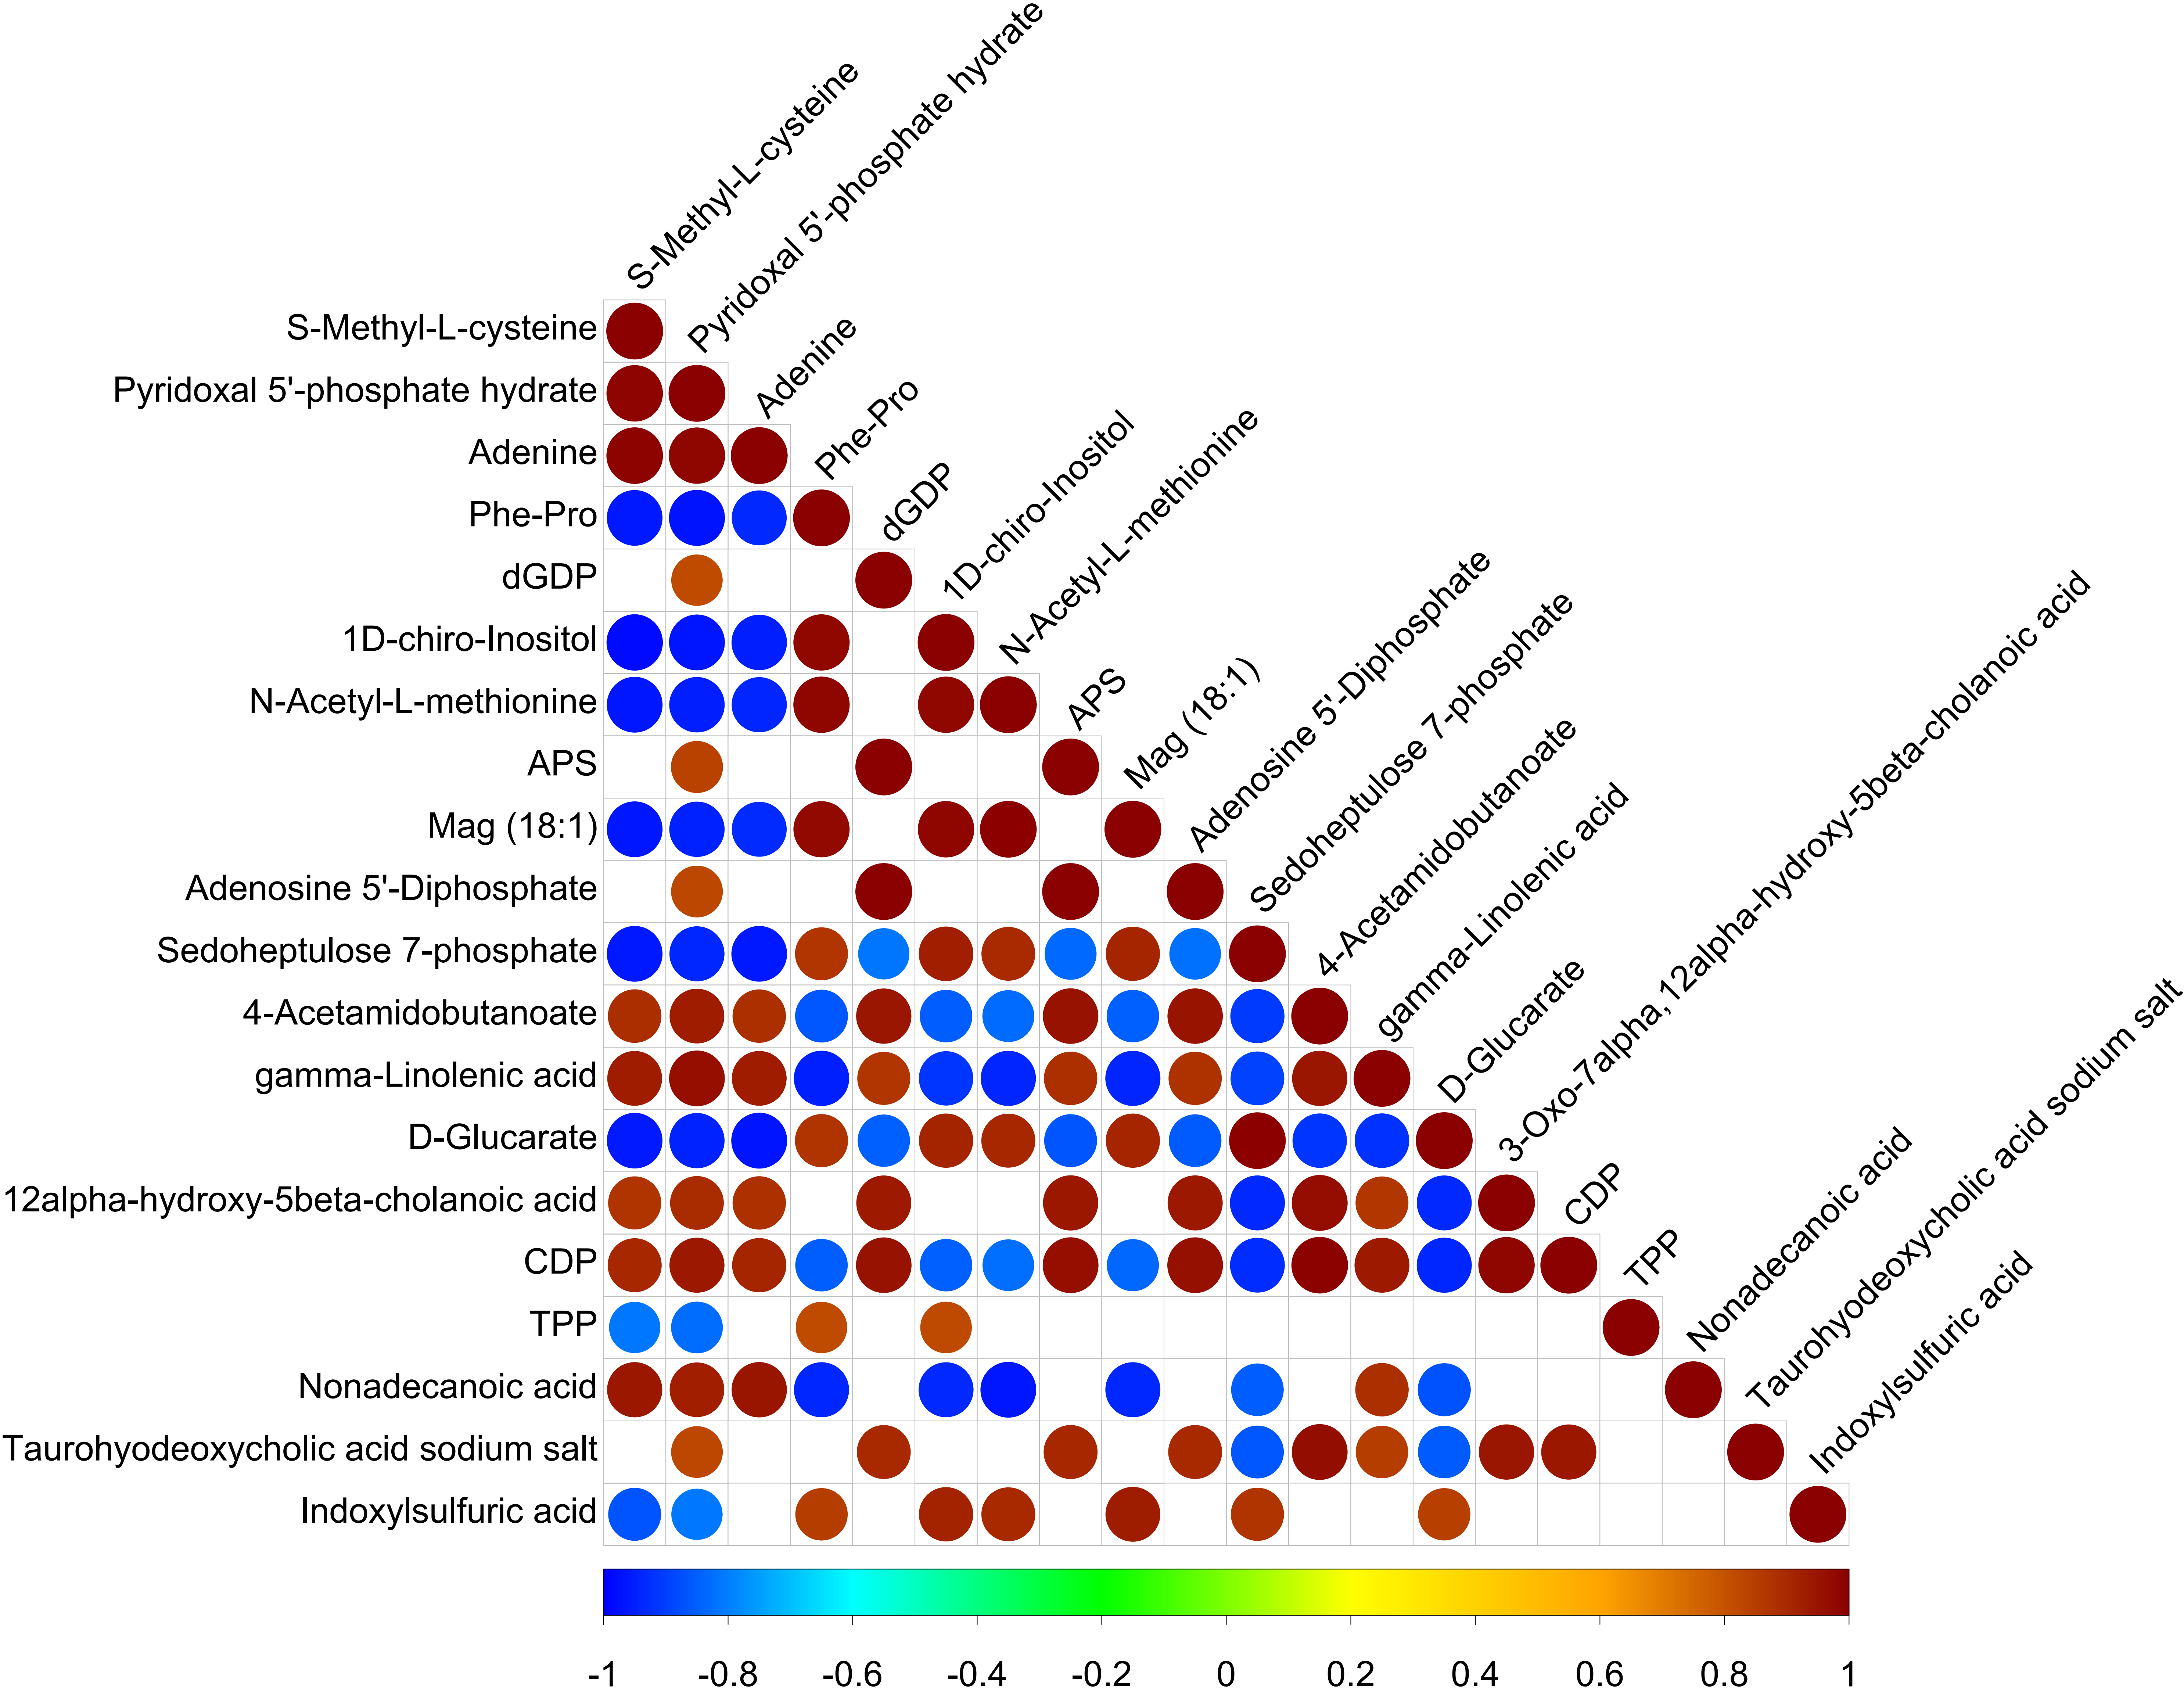

Supplement: Data_Sheet_1.ZIP [file Data_Sheet_1.ZIP]

High\_GAA.vs.Control



Supplement: Data_Sheet_1.ZIP [file Data_Sheet_1.ZIP]

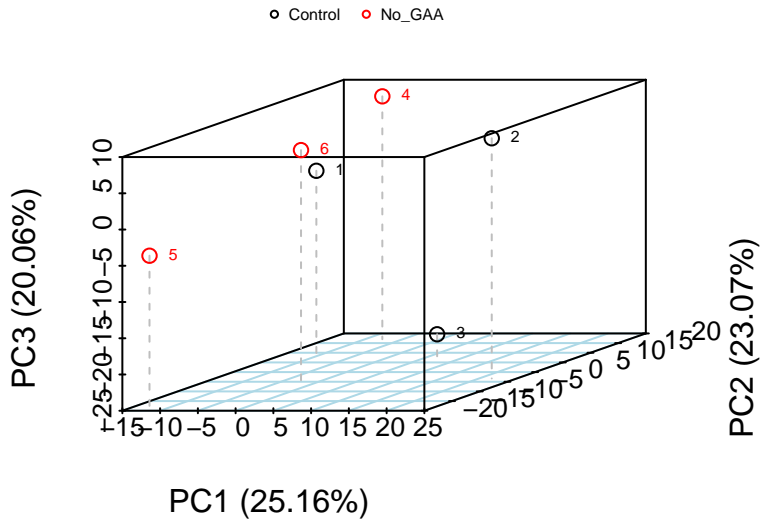

Supplement: Data_Sheet_1.ZIP [file Data_Sheet_1.ZIP]

High\_GAA.vs.Control



Supplement: Data_Sheet_1.ZIP [file Data_Sheet_1.ZIP]

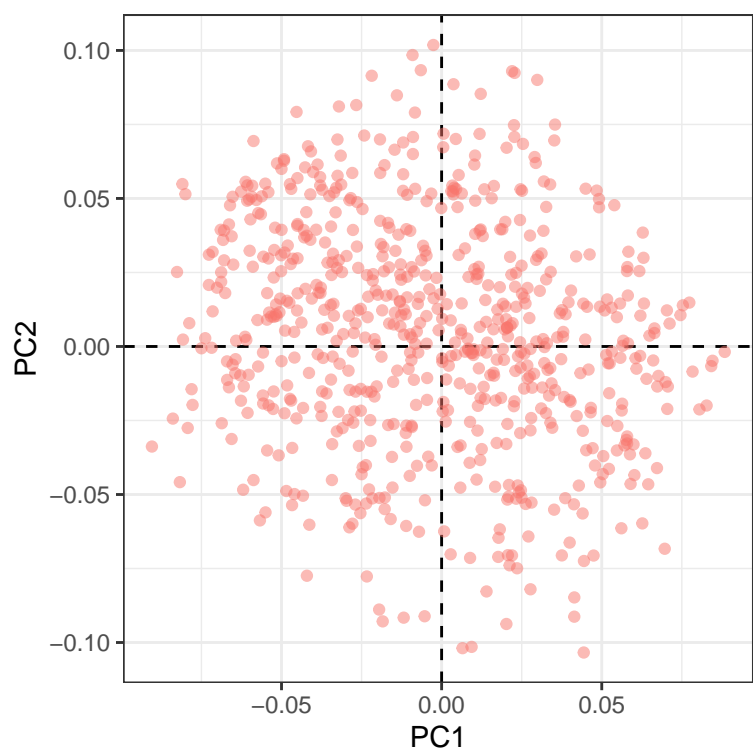

Supplement: Data_Sheet_1.ZIP [file Data_Sheet_1.ZIP]

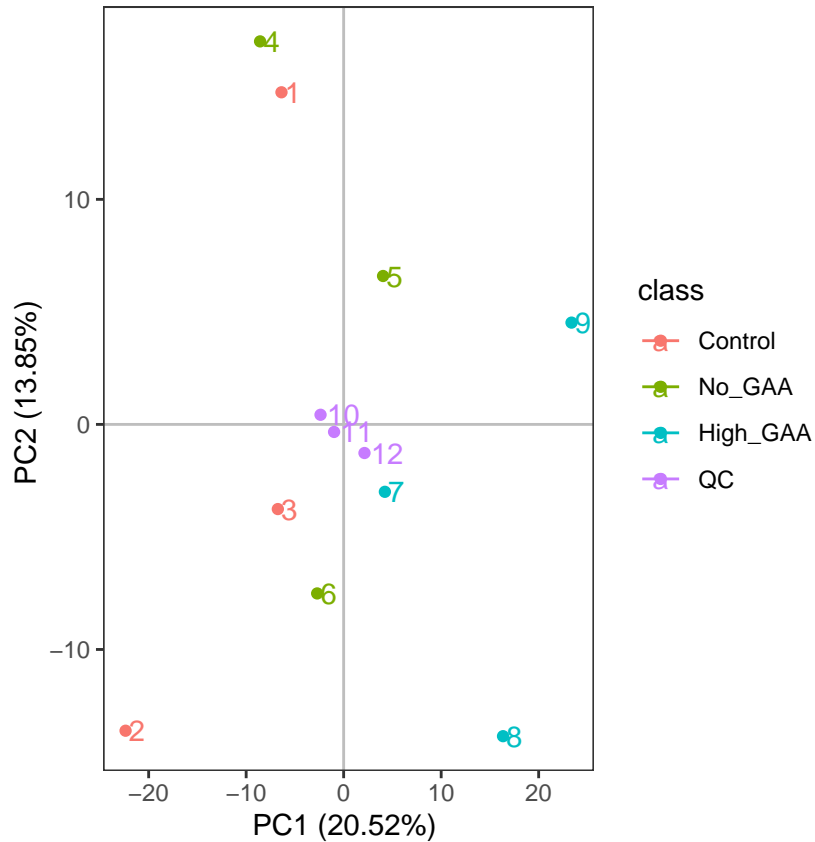

Supplement: Data_Sheet_1.ZIP [file Data_Sheet_1.ZIP]

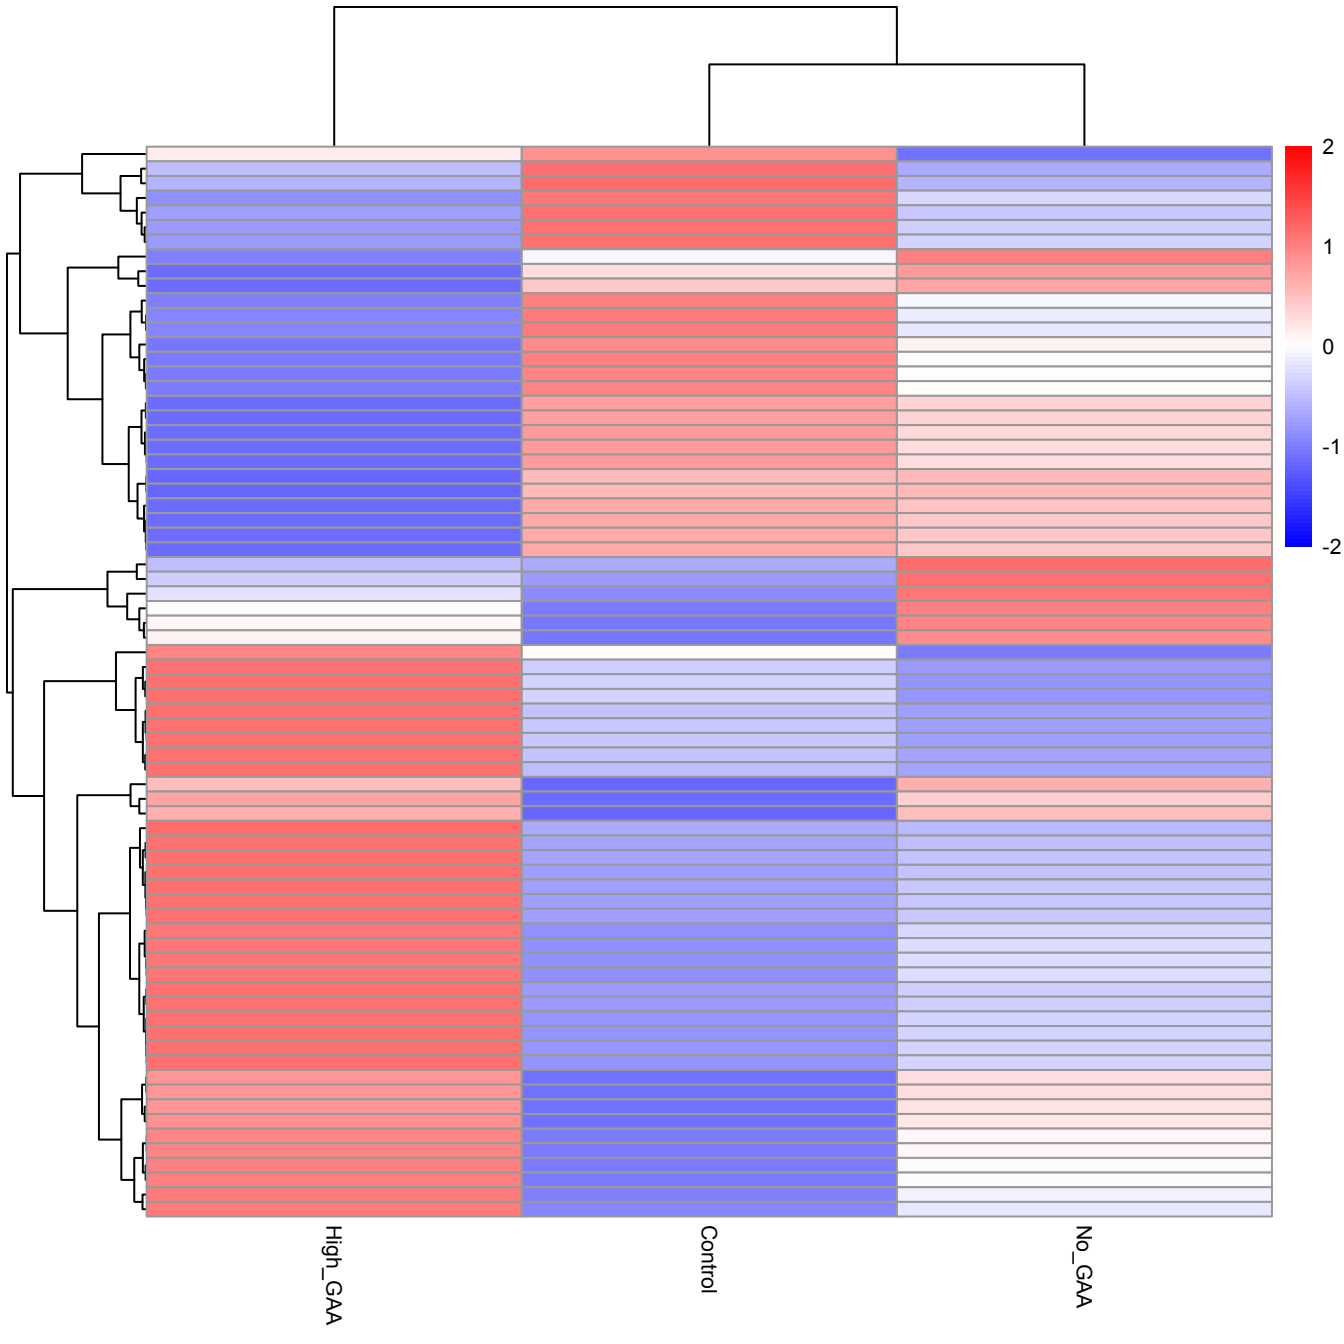

Supplement: Data_Sheet_1.ZIP [file Data_Sheet_1.ZIP]

High\_GAA.vs.No\_GAA



Supplement: Data_Sheet_1.ZIP [file Data_Sheet_1.ZIP]

High\_GAA.vs.No\_GAA



Supplement: Data_Sheet_1.ZIP [file Data_Sheet_1.ZIP]

# No\_GAA.vs.Control

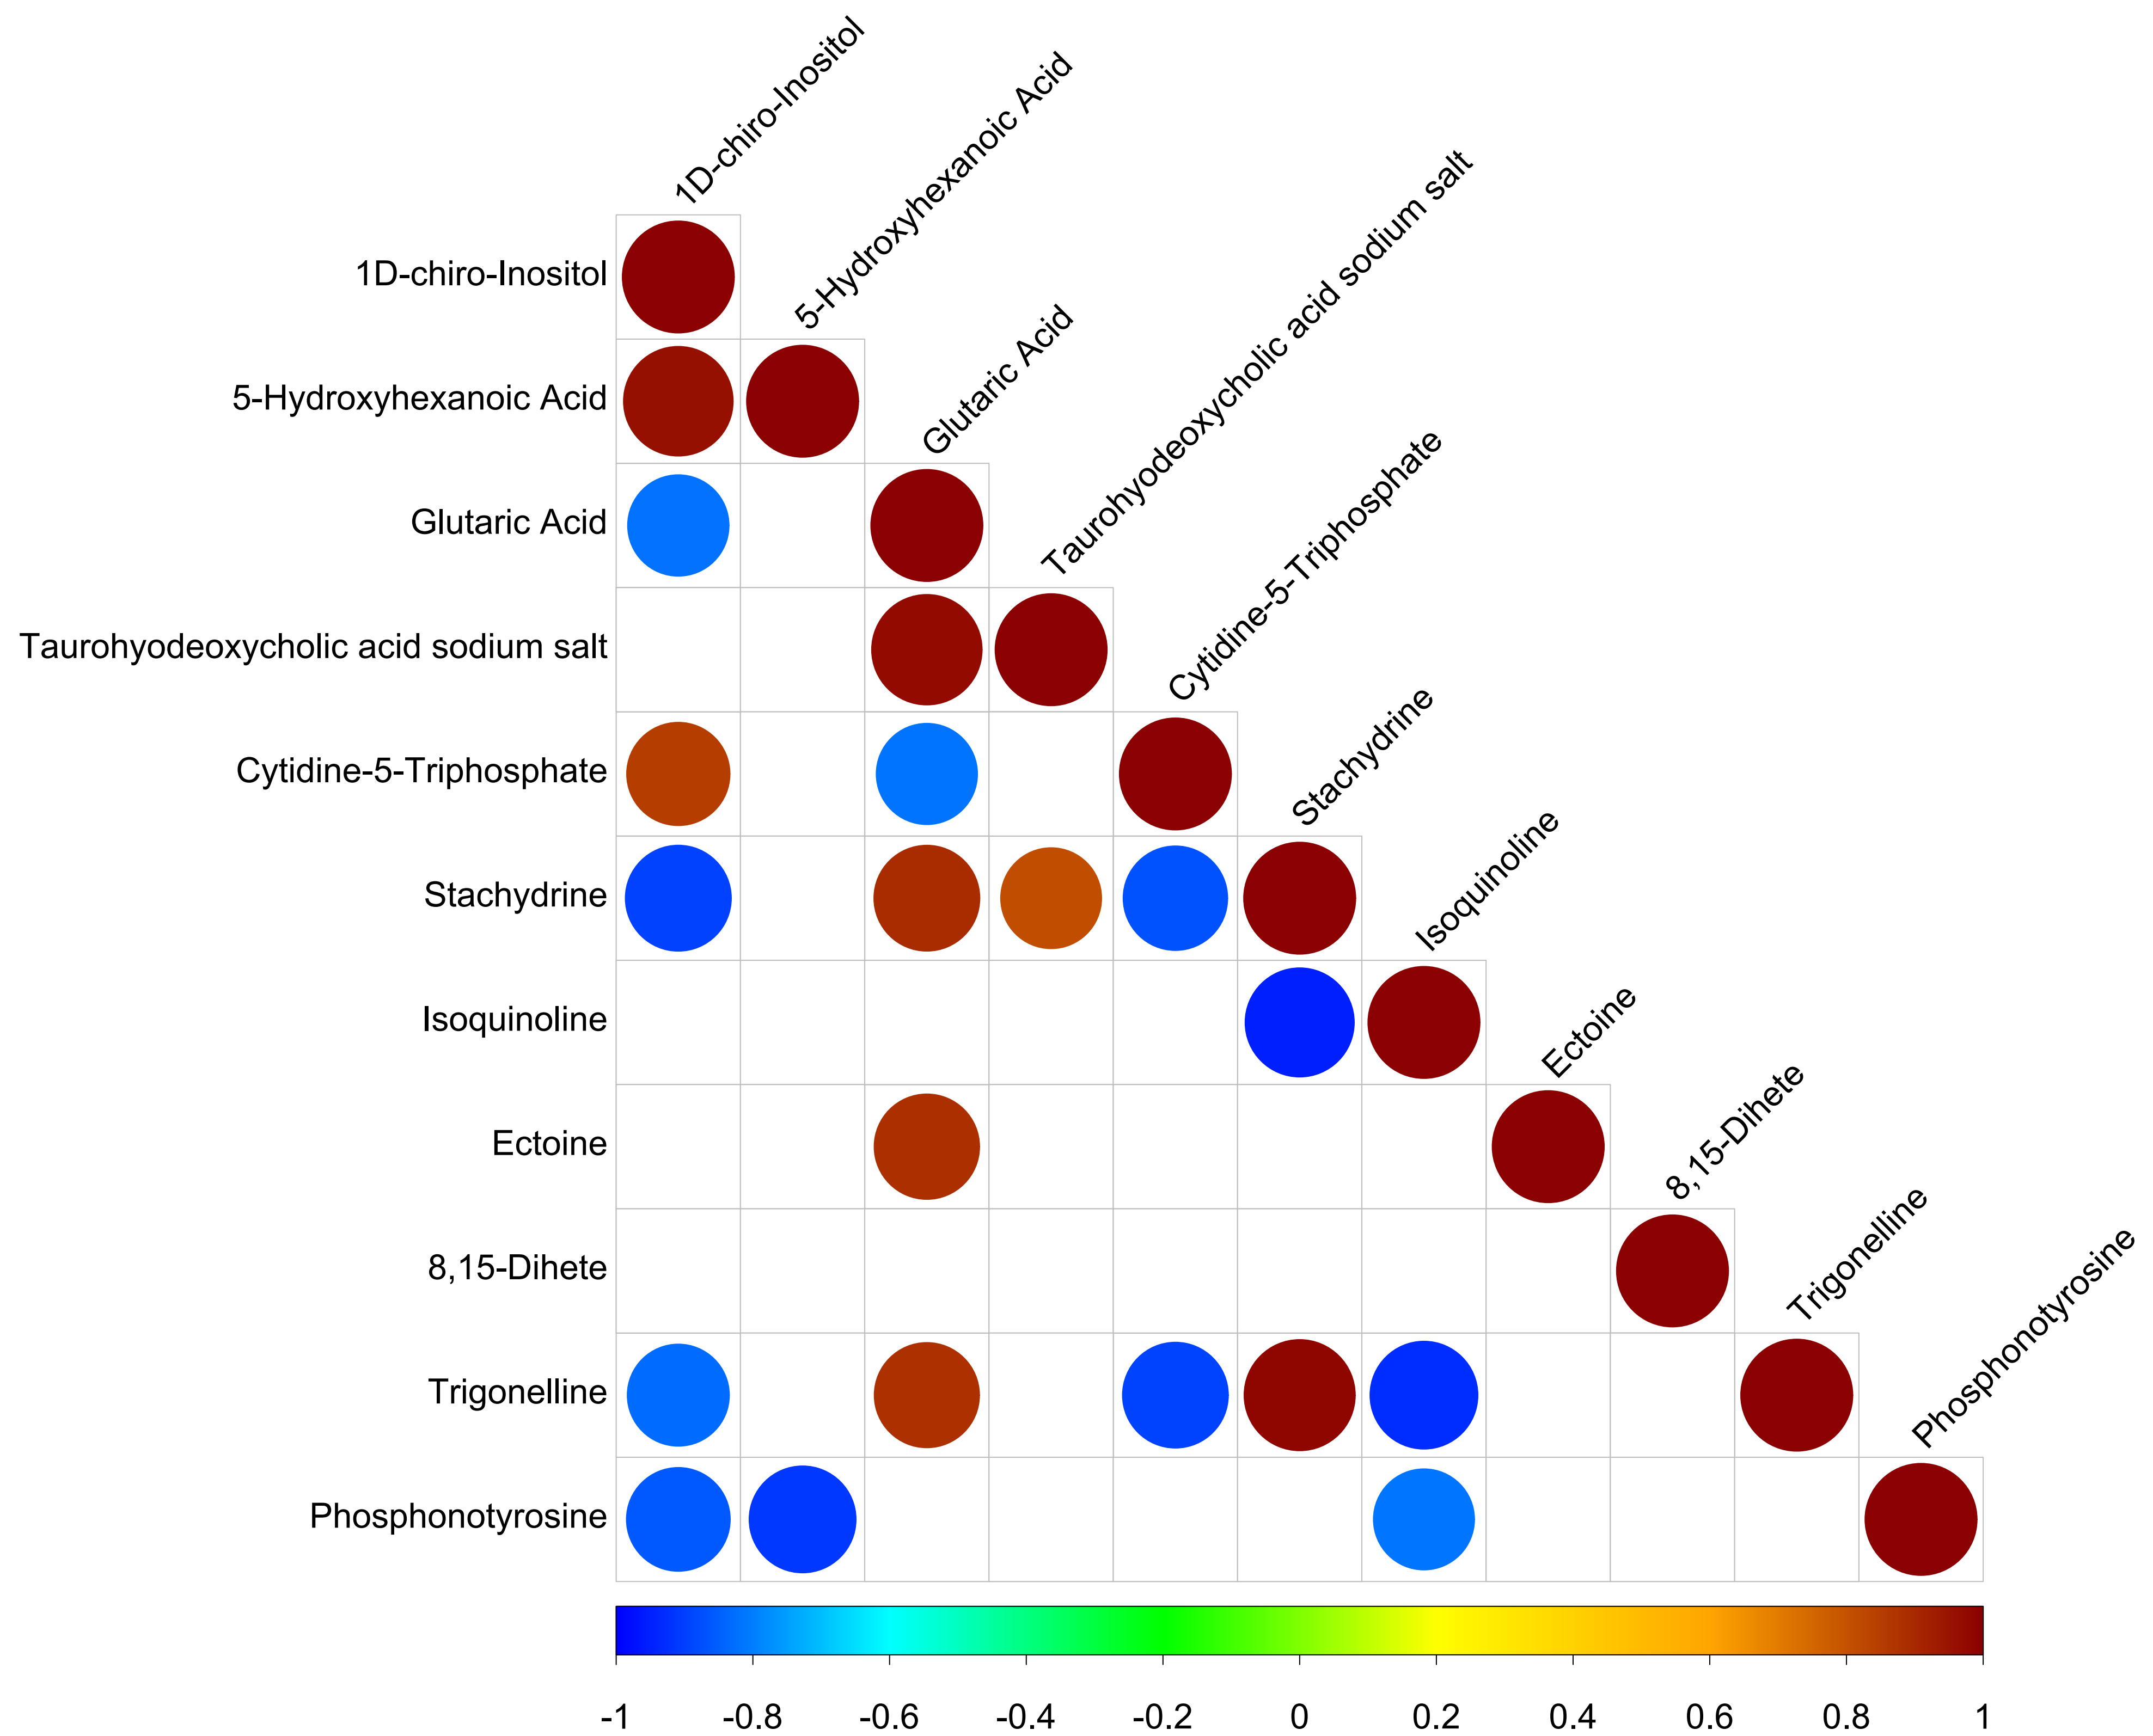

Supplement: Data_Sheet_1.ZIP [file Data_Sheet_1.ZIP]

Pearson correlation between all QC samples

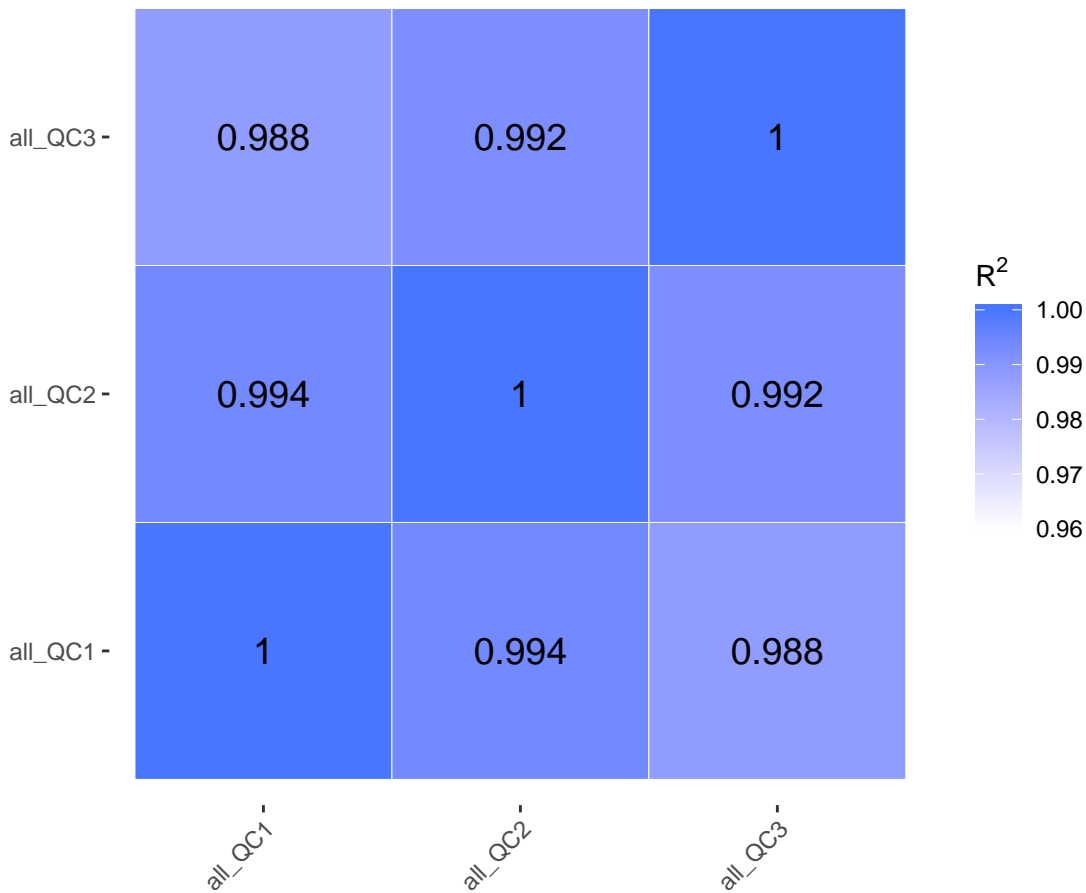

Supplement: Data_Sheet_1.ZIP [file Data_Sheet_1.ZIP]

High\_GAA.vs.No\_GAA



Supplement: Data_Sheet_1.ZIP [file Data_Sheet_1.ZIP]

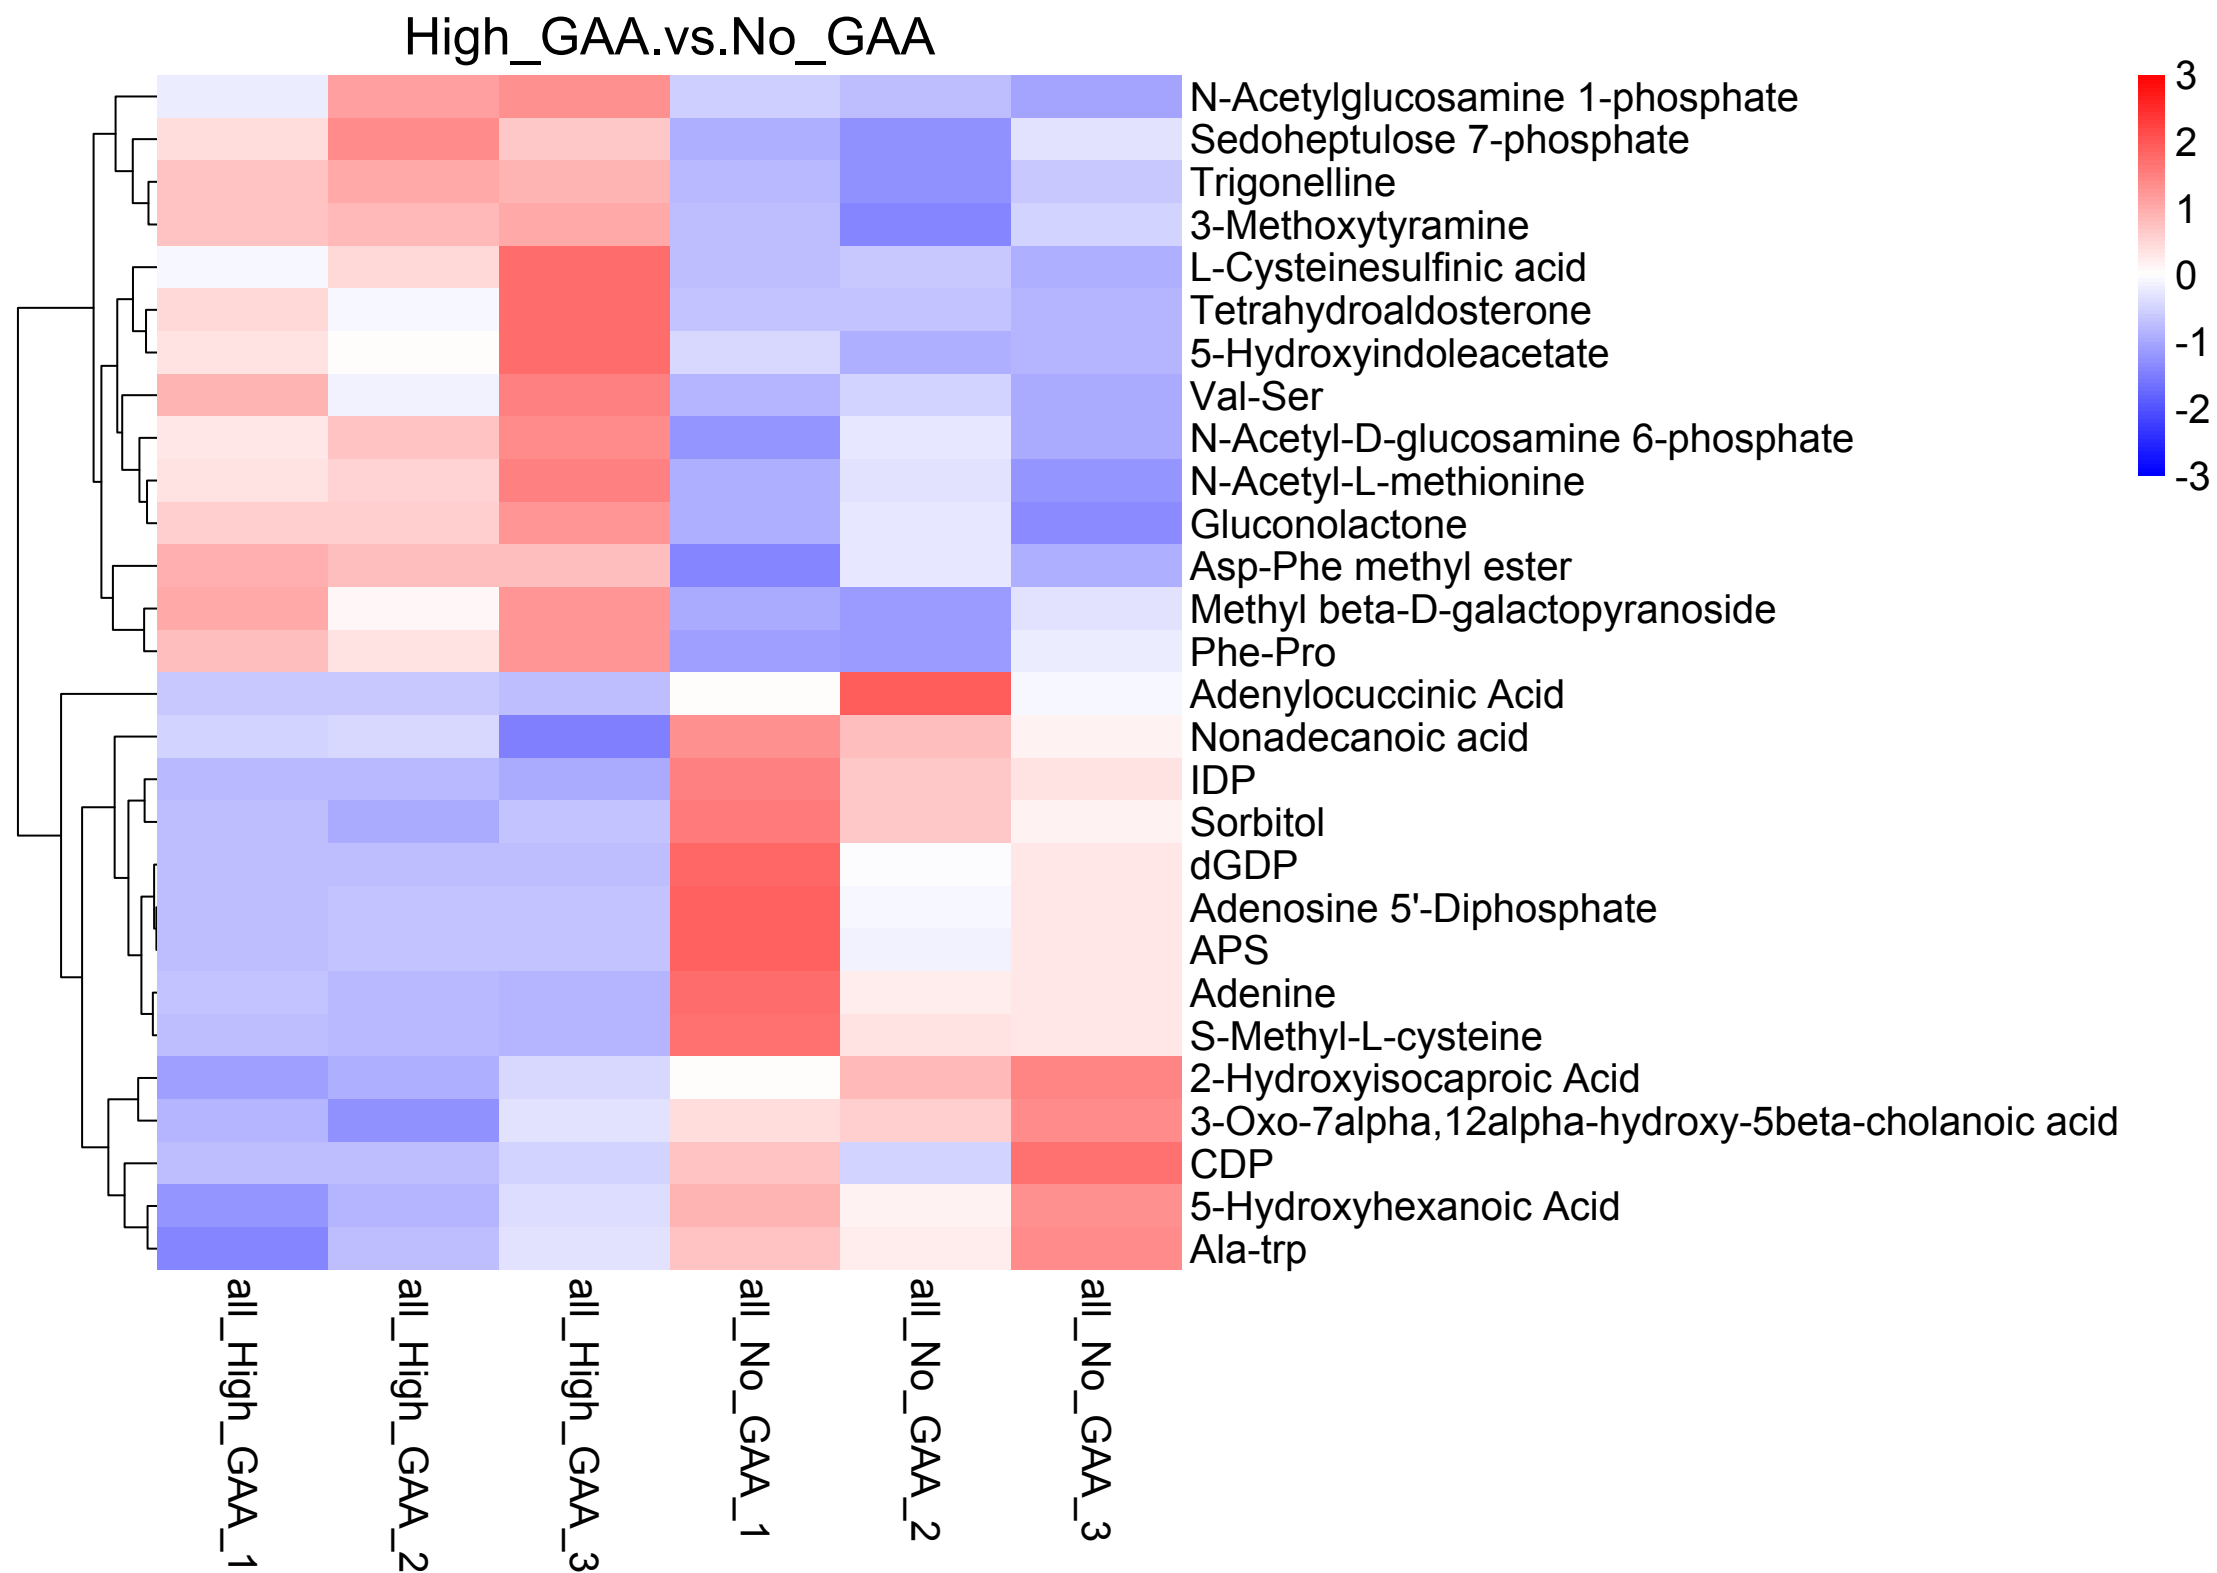

Supplement: Data_Sheet_1.ZIP [file Data_Sheet_1.ZIP]

High\_GAA.vs.Control



Supplement: Data_Sheet_1.ZIP [file Data_Sheet_1.ZIP]

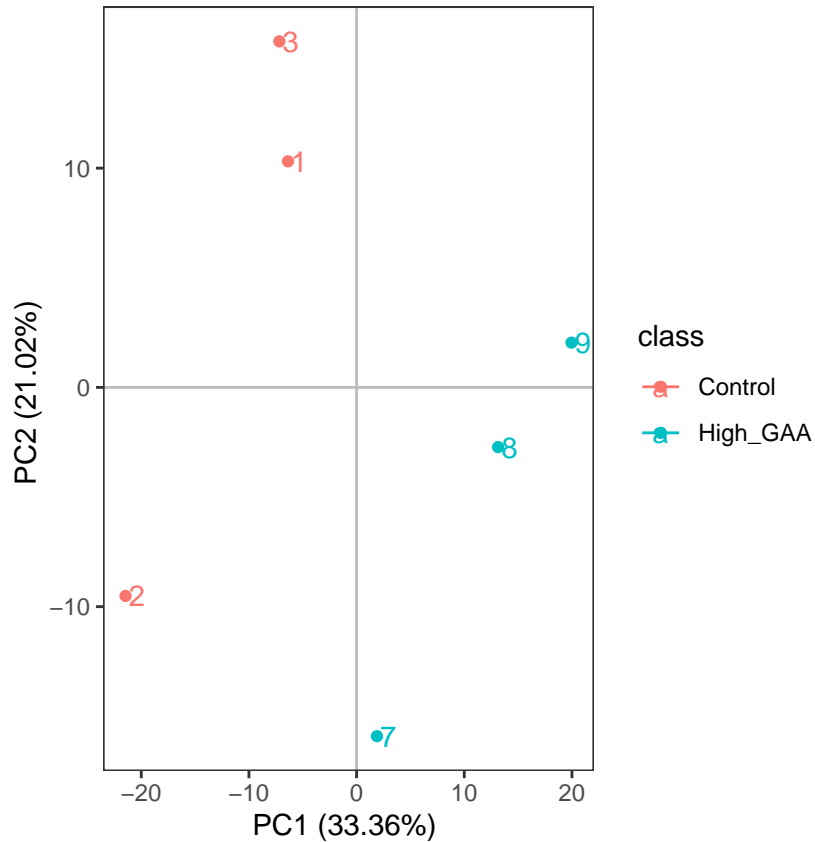

Supplement: Data_Sheet_1.ZIP [file Data_Sheet_1.ZIP]

High\_GAA.vs.Control

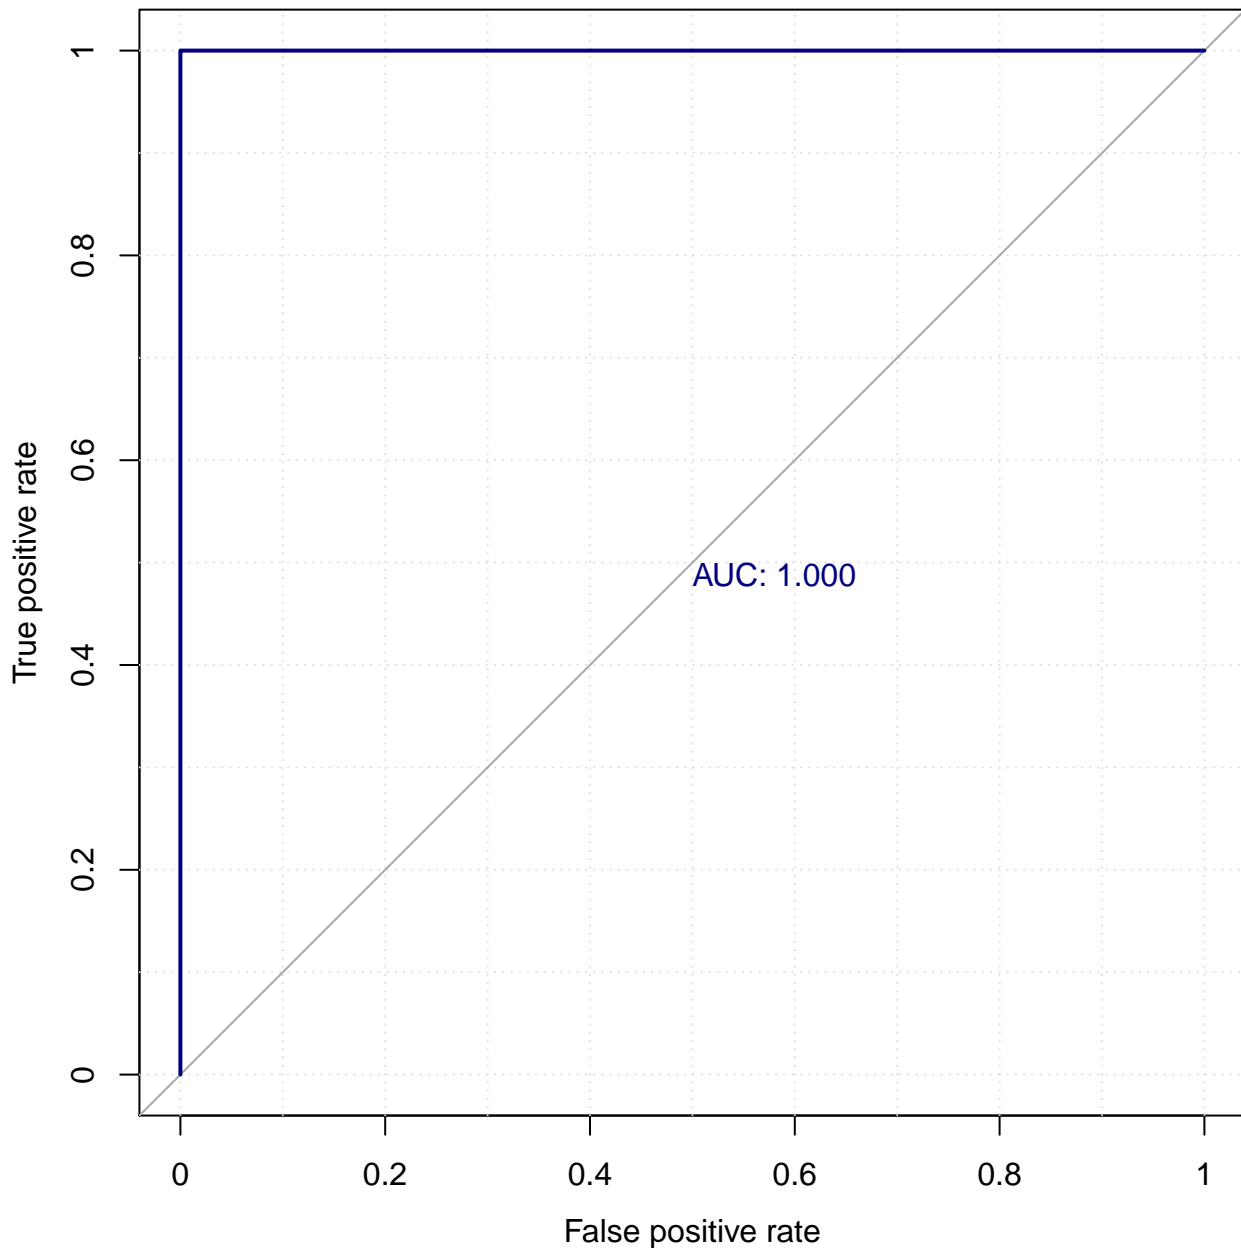

Supplement: Data_Sheet_1.ZIP [file Data_Sheet_1.ZIP]

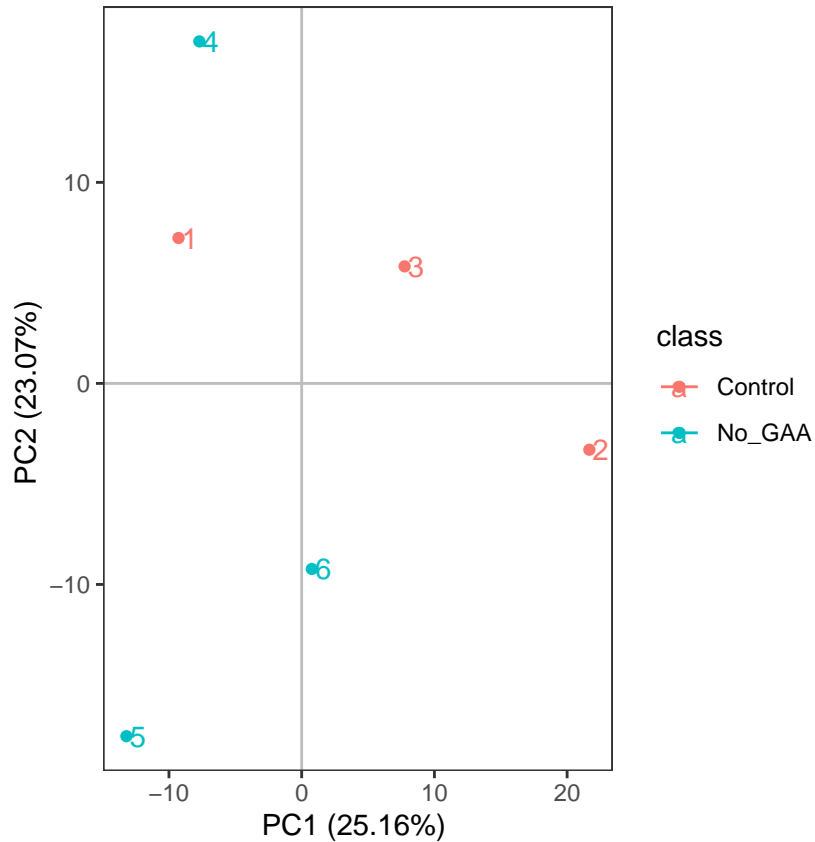

Supplement: Data_Sheet_1.ZIP [file Data_Sheet_1.ZIP]

High\_GAA.vs.Control



Supplement: Data_Sheet_1.ZIP [file Data_Sheet_1.ZIP]

High\_GAA.vs.No\_GAA



Supplement: Data_Sheet_1.ZIP [file Data_Sheet_1.ZIP]

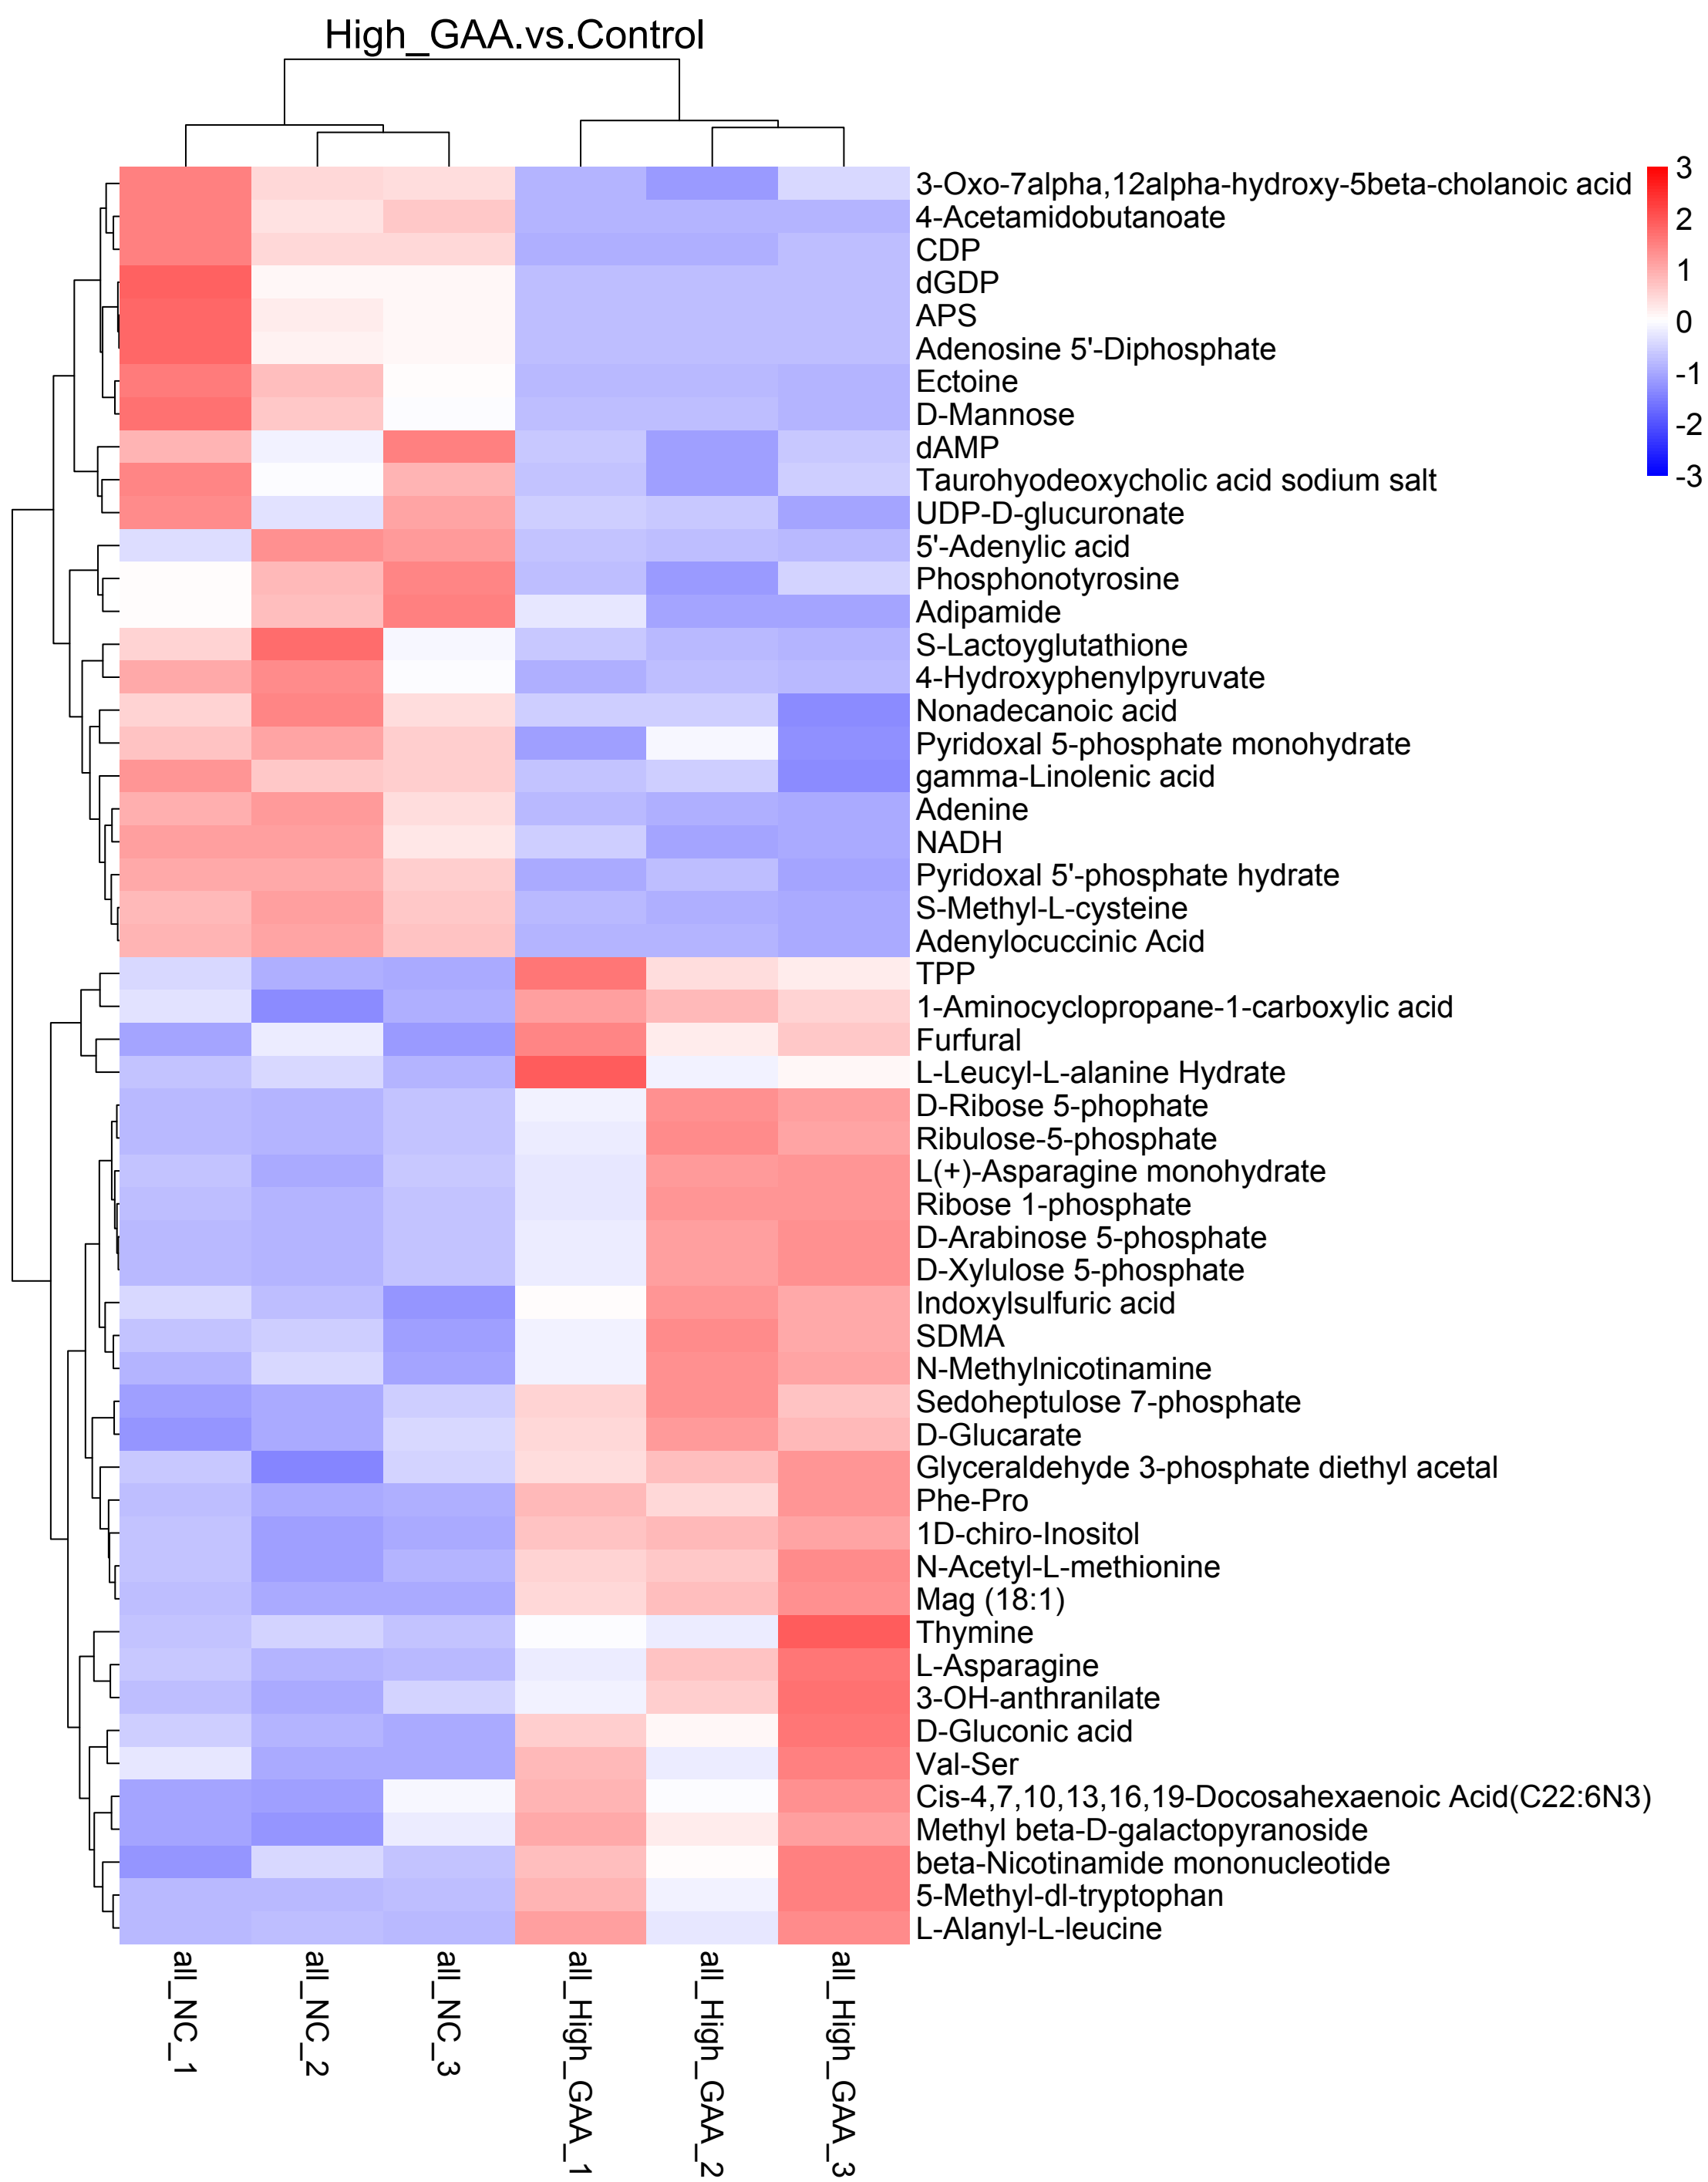

Supplement: Data_Sheet_1.ZIP [file Data_Sheet_1.ZIP]

No\_GAA.vs.Control

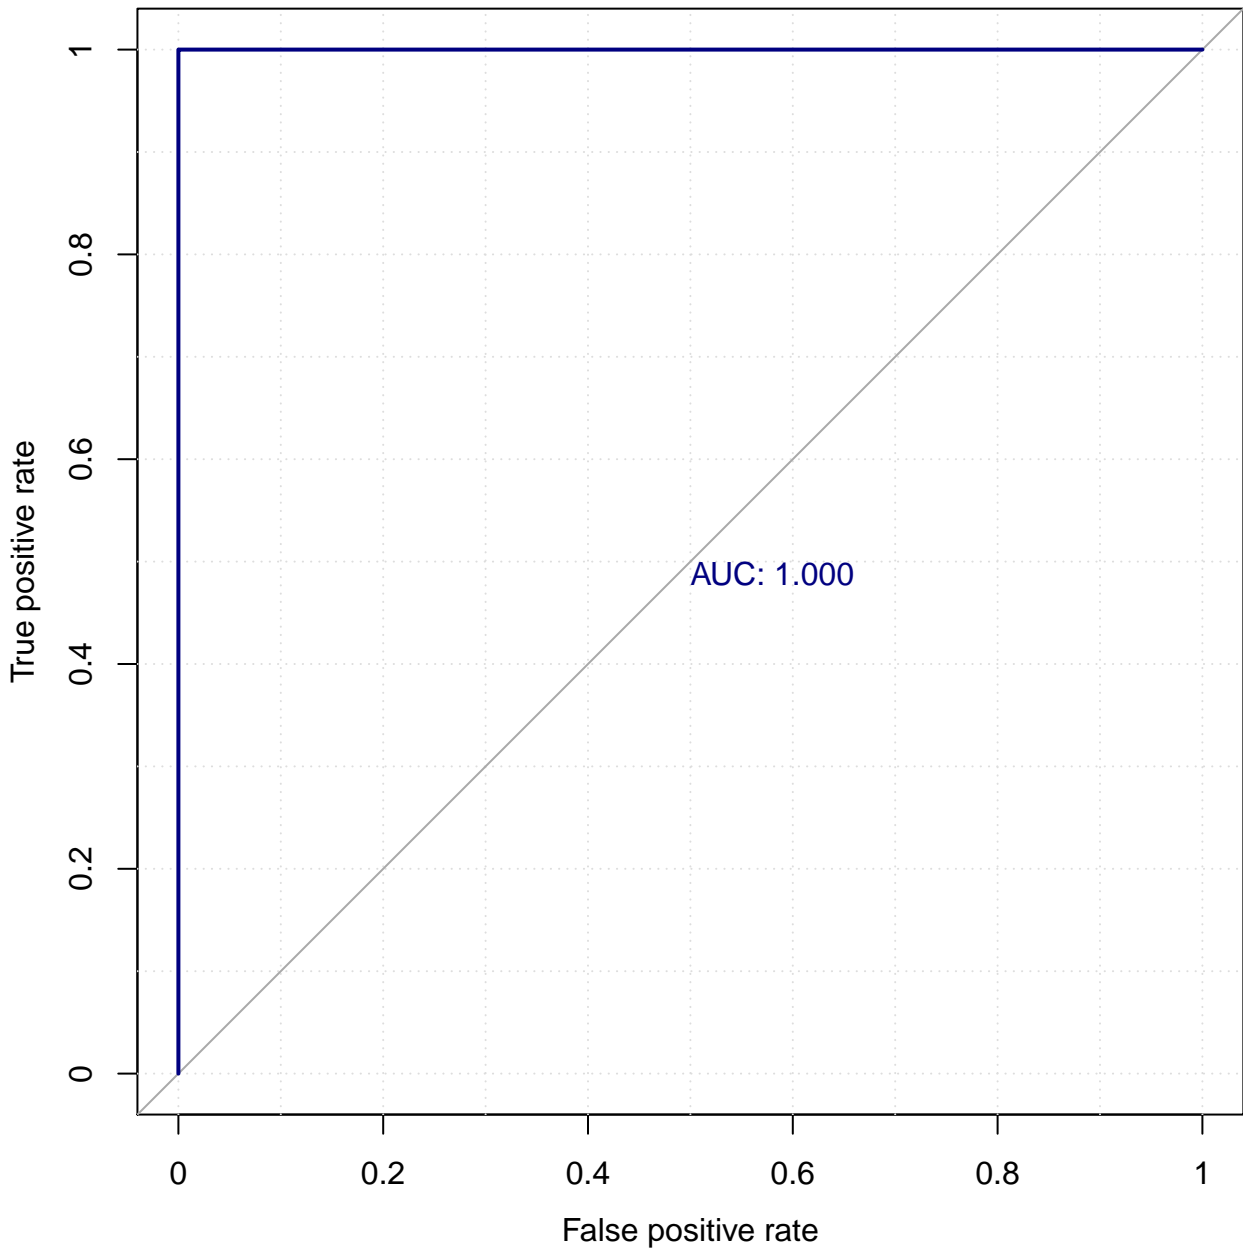

Supplement: Data_Sheet_1.ZIP [file Data_Sheet_1.ZIP]

High\_GAA.vs.Control



Supplement: Data_Sheet_1.ZIP [file Data_Sheet_1.ZIP]

High\_GAA.vs.Control



Supplement: Data_Sheet_1.ZIP [file Data_Sheet_1.ZIP]

High\_GAA.vs.Control



Supplement: Data_Sheet_1.ZIP [file Data_Sheet_1.ZIP]

High\_GAA.vs.Control

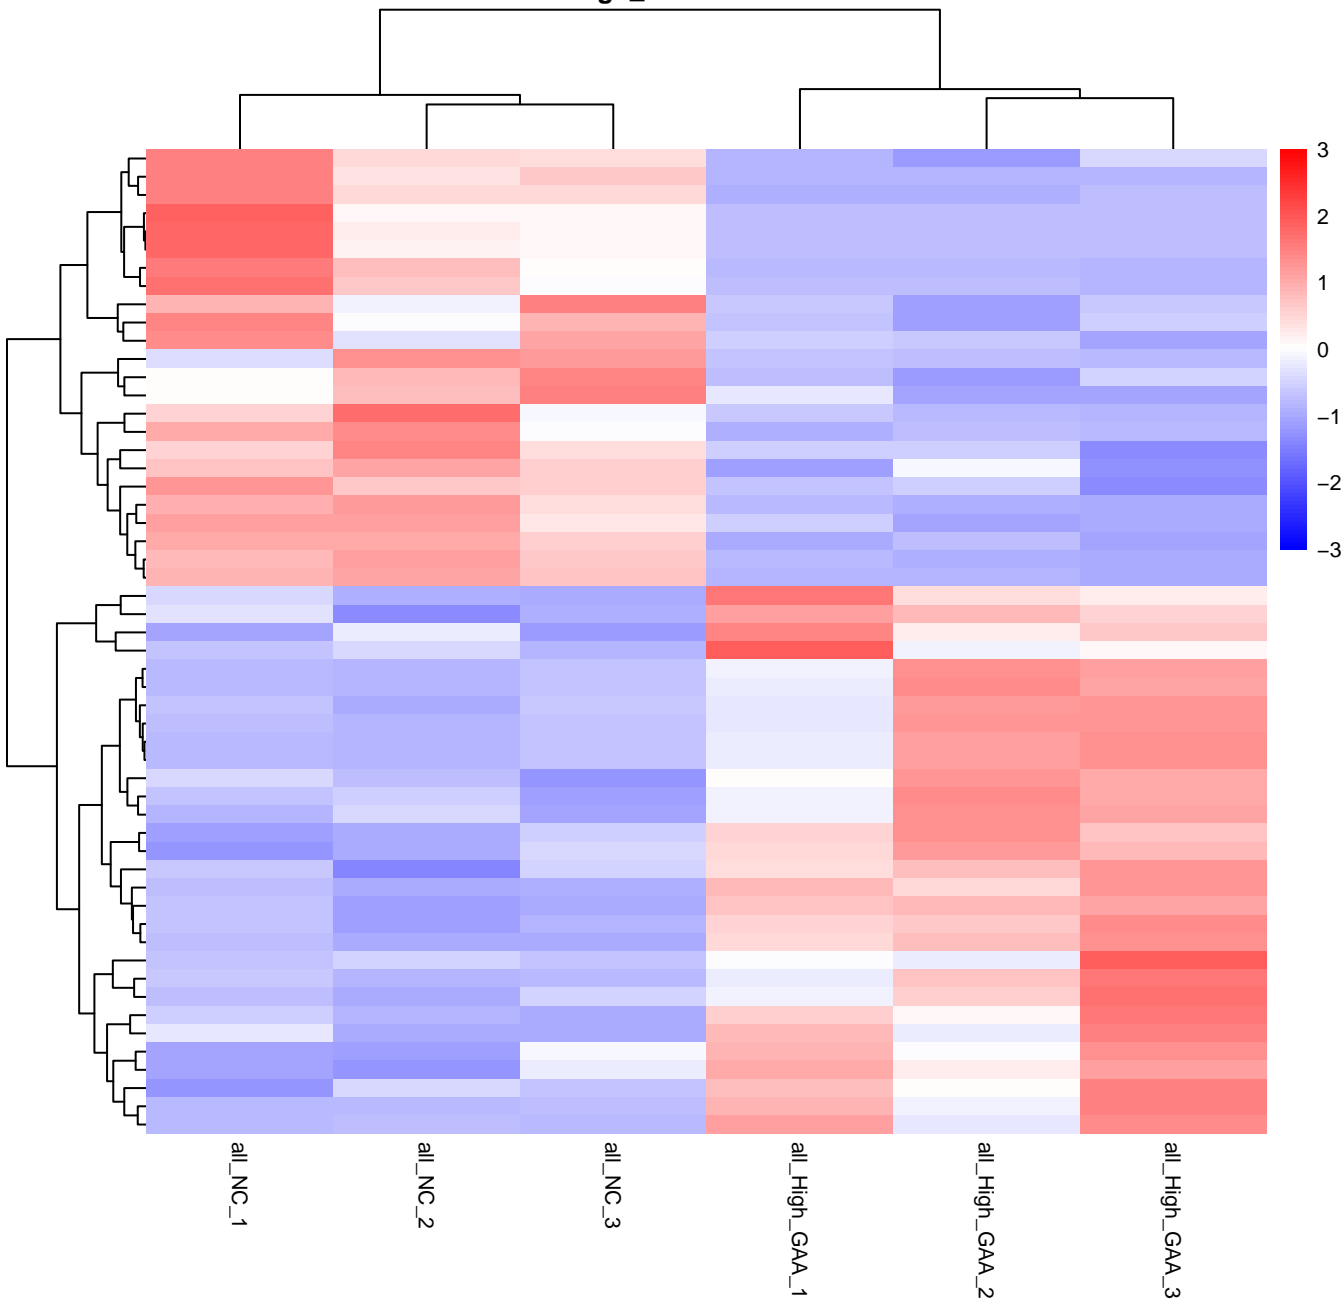

Supplement: Data_Sheet_1.ZIP [file Data_Sheet_1.ZIP]

No\_GAA.vs.Control



Supplement: Data_Sheet_1.ZIP [file Data_Sheet_1.ZIP]

class     Control     High\_GAA

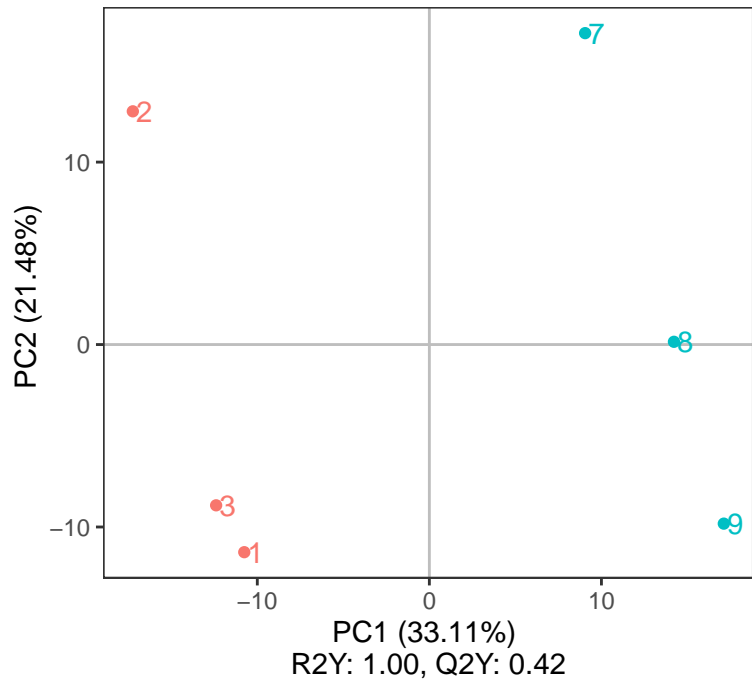

Supplement: Data_Sheet_1.ZIP [file Data_Sheet_1.ZIP]

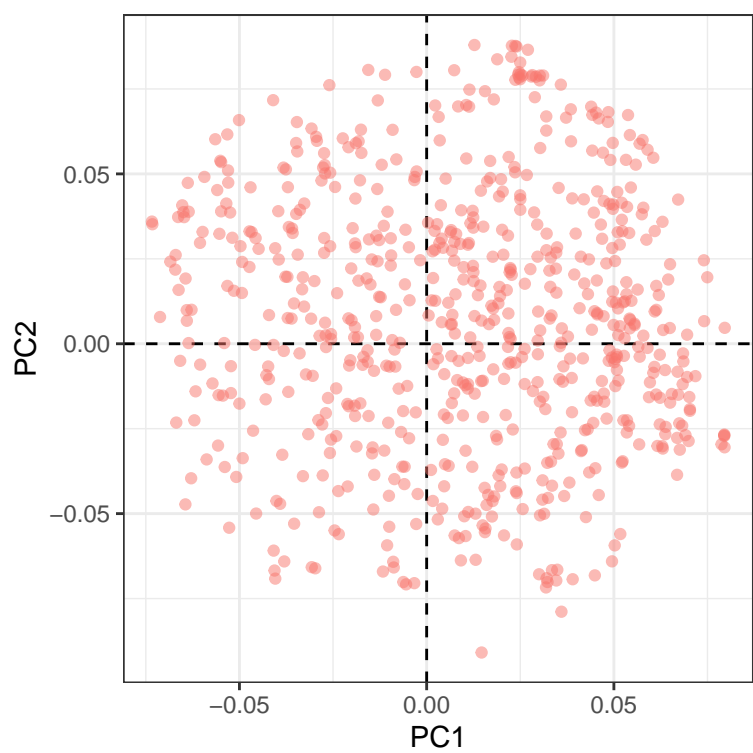

Supplement: Data_Sheet_1.ZIP [file Data_Sheet_1.ZIP]

High\_GAA.vs.Control



Supplement: Data_Sheet_1.ZIP [file Data_Sheet_1.ZIP]

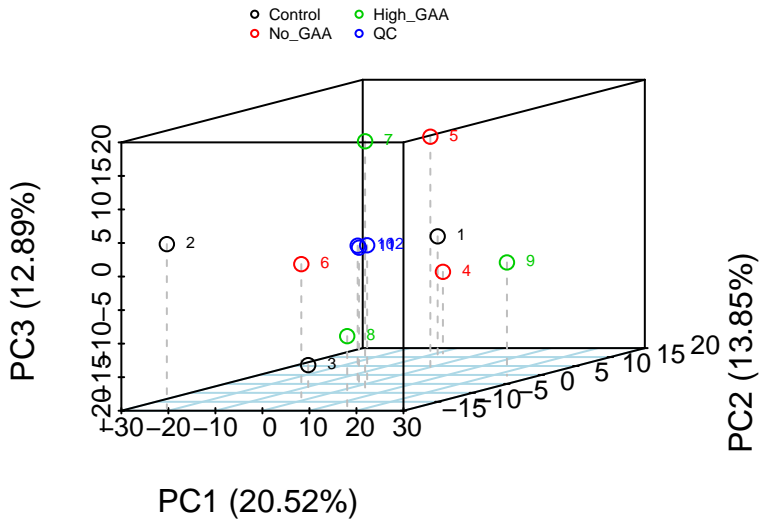

Supplement: Data_Sheet_1.ZIP [file Data_Sheet_1.ZIP]

High\_GAA.vs.No\_GAA

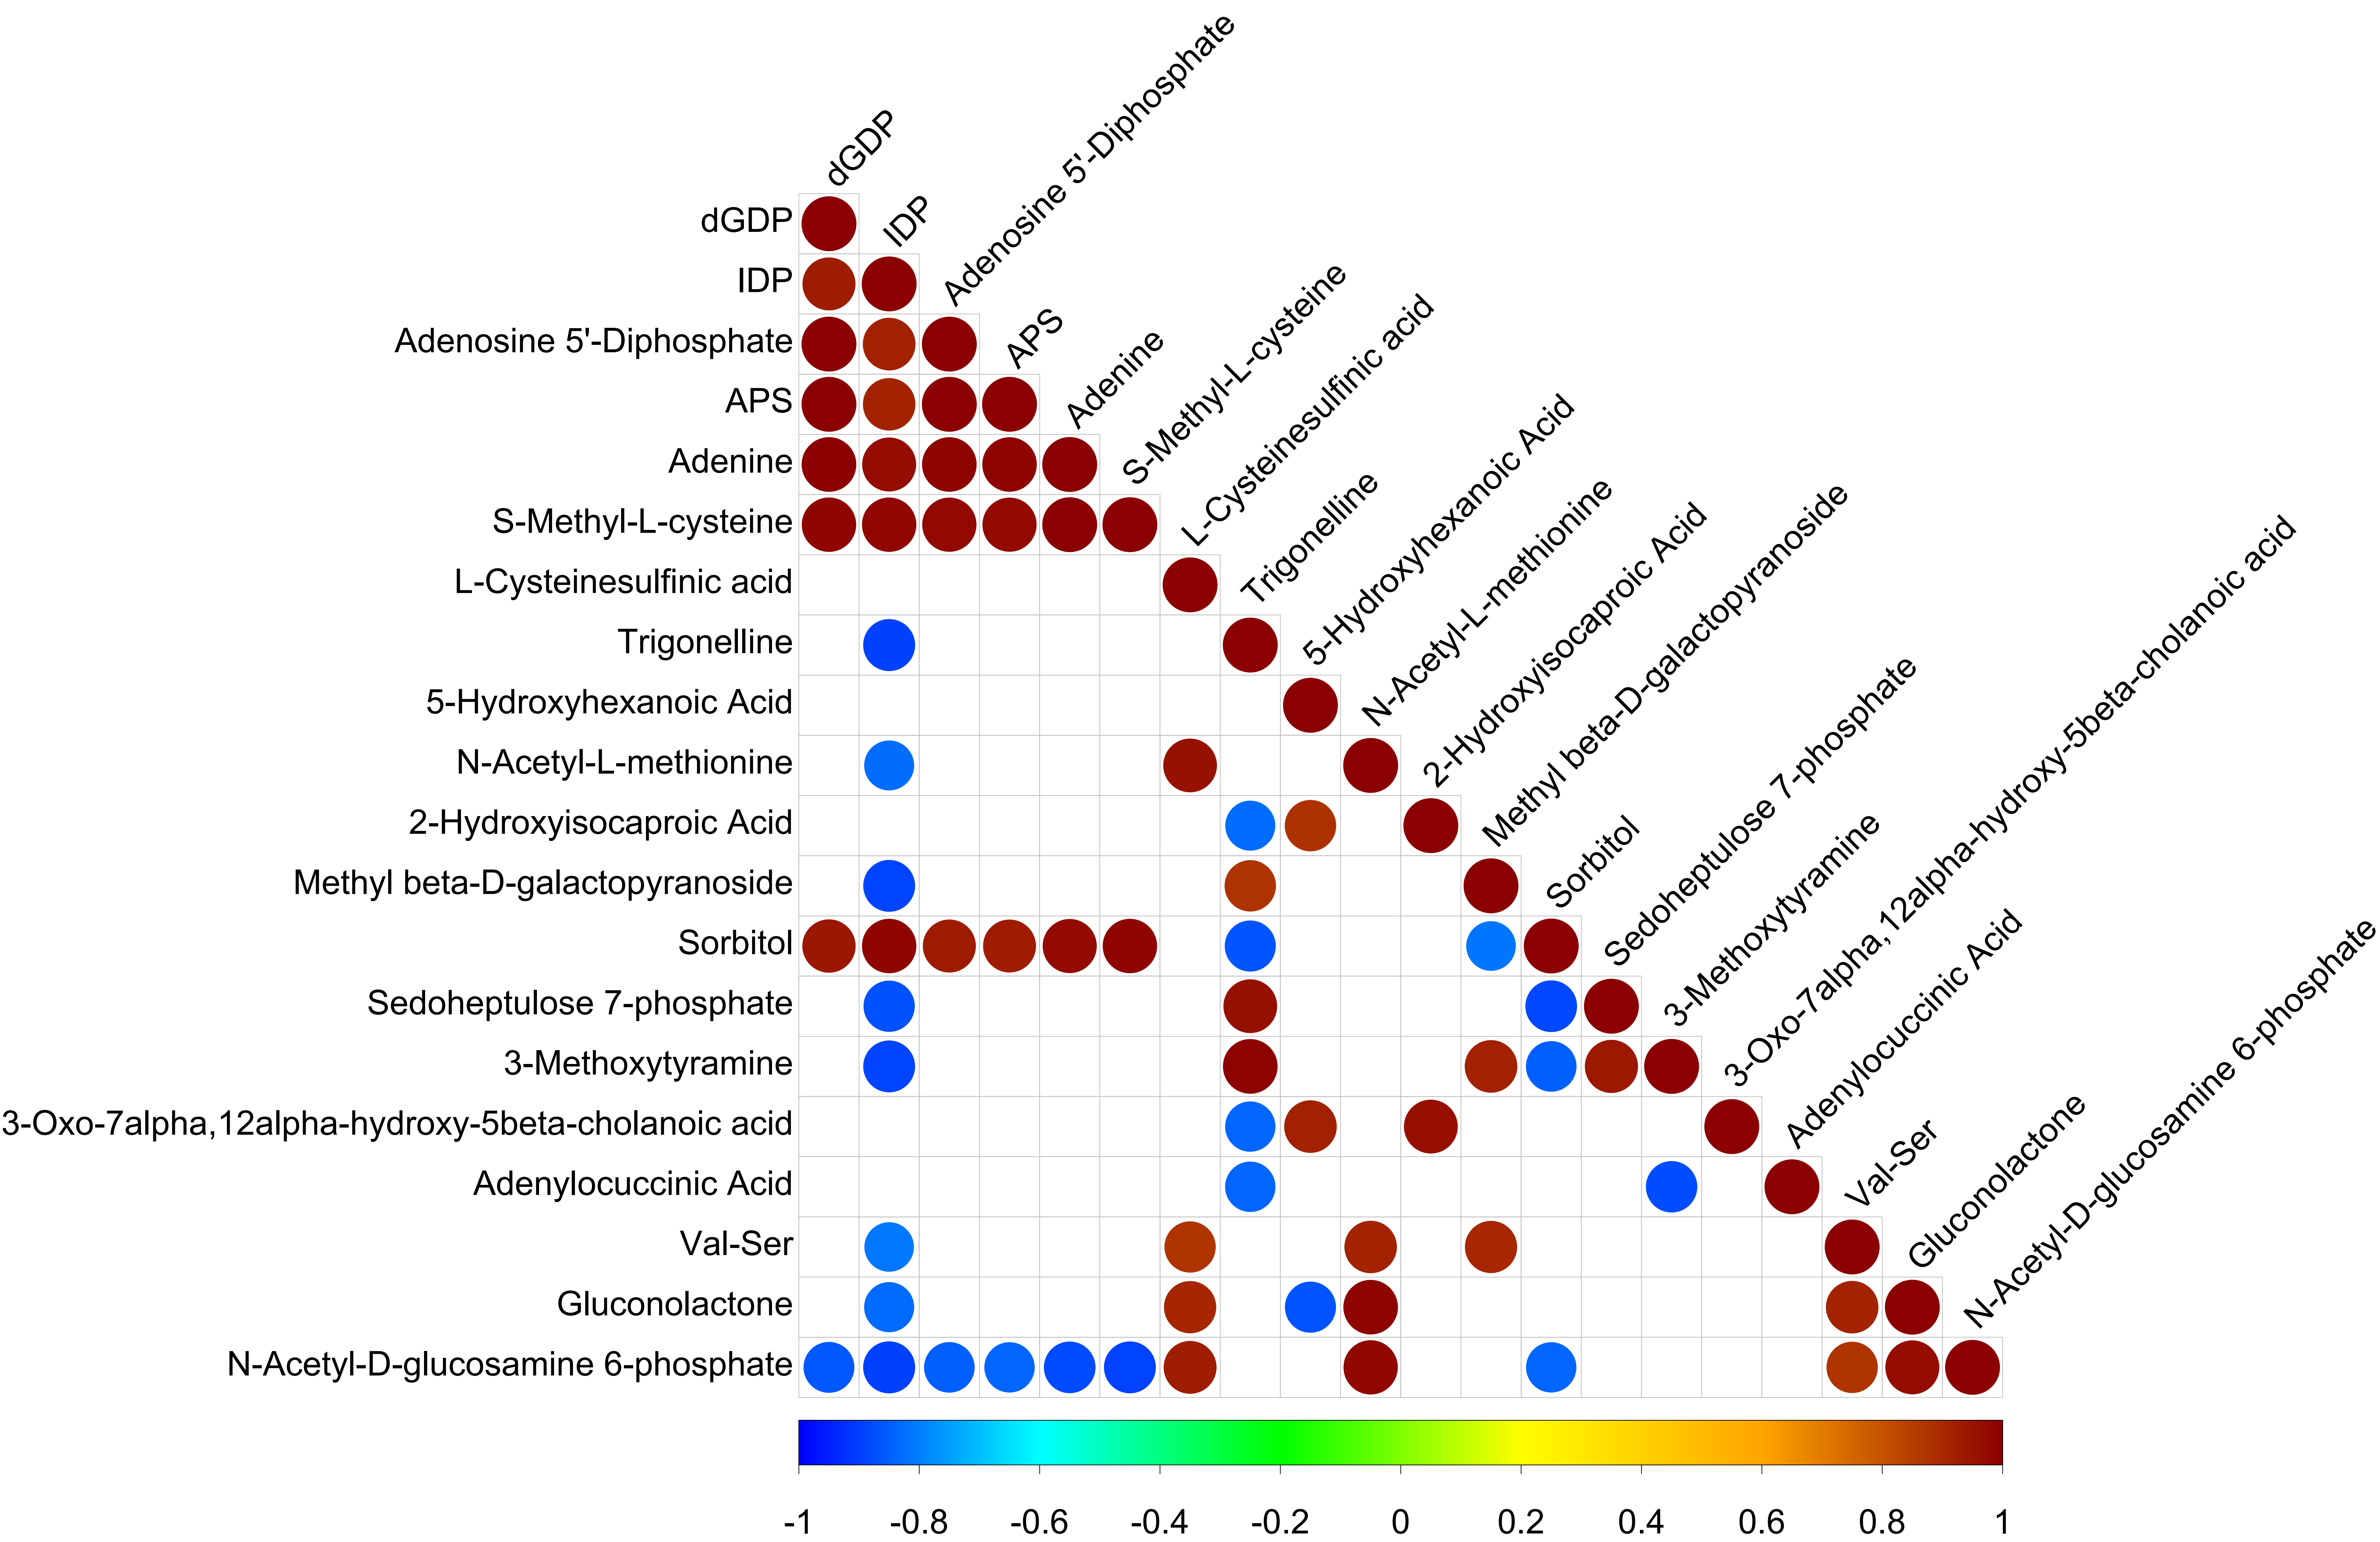

Supplement: Data_Sheet_1.ZIP [file Data_Sheet_1.ZIP]

High\_GAA.vs.Control



Supplement: Data_Sheet_1.ZIP [file Data_Sheet_1.ZIP]

High\_GAA.vs.Control



Supplement: Data_Sheet_1.ZIP [file Data_Sheet_1.ZIP]

High\_GAA.vs.No\_GAA



Supplement: Data_Sheet_1.ZIP [file Data_Sheet_1.ZIP]

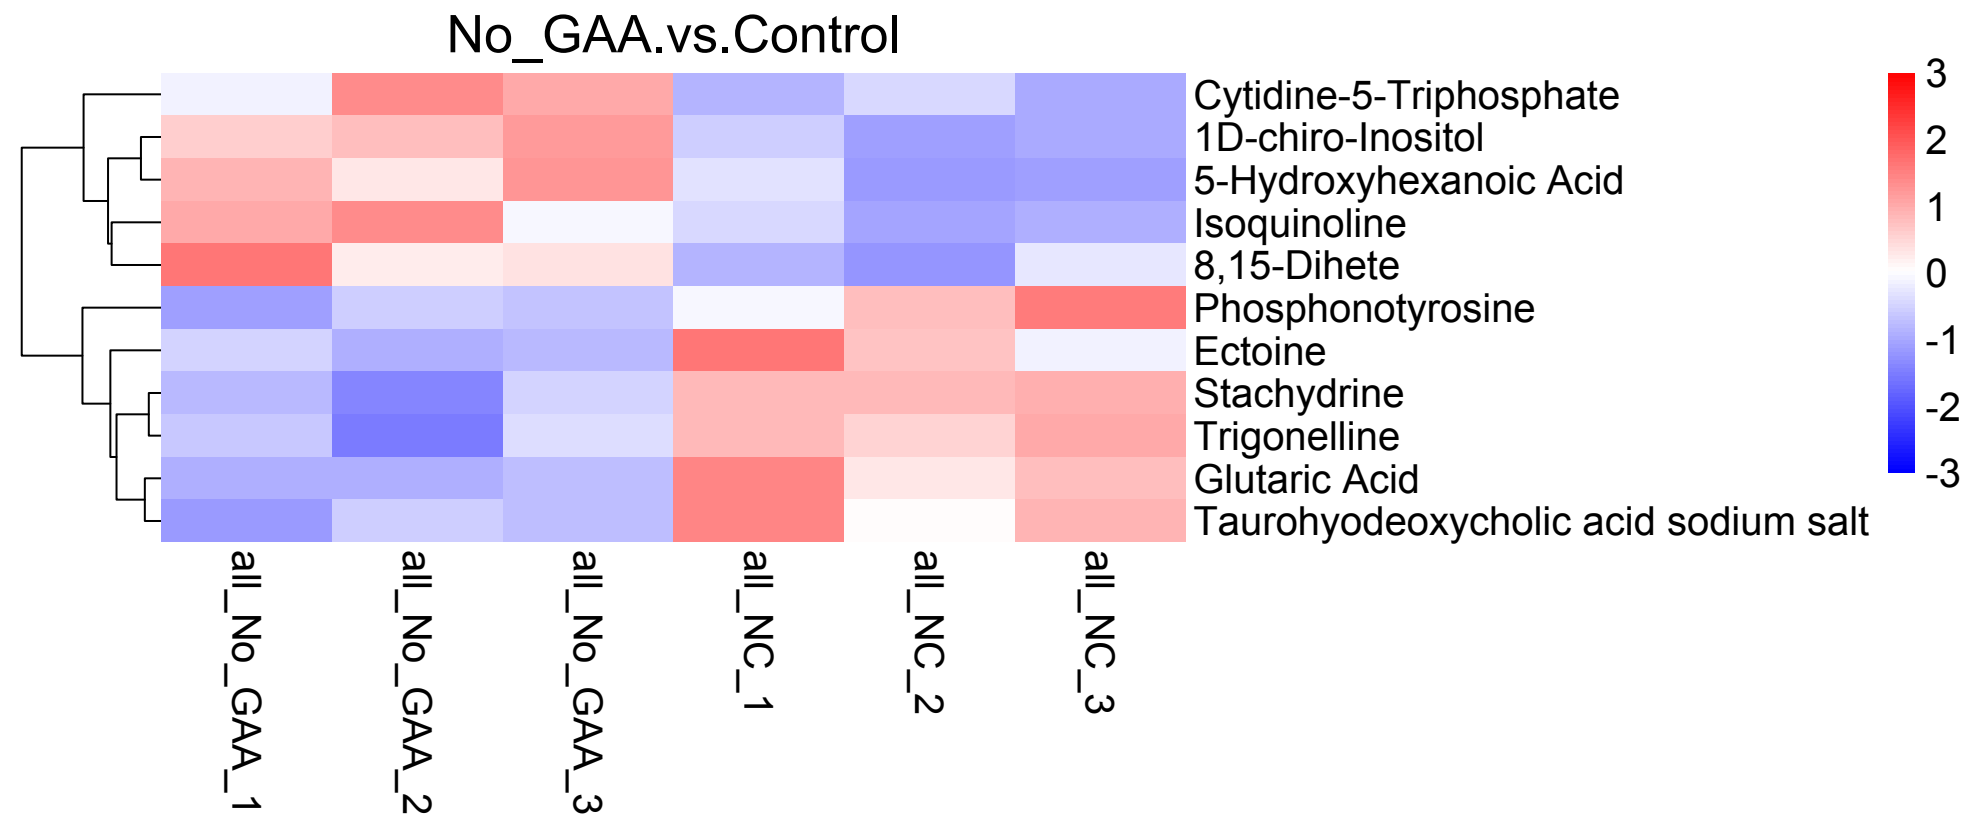

Supplement: Data_Sheet_1.ZIP [file Data_Sheet_1.ZIP]

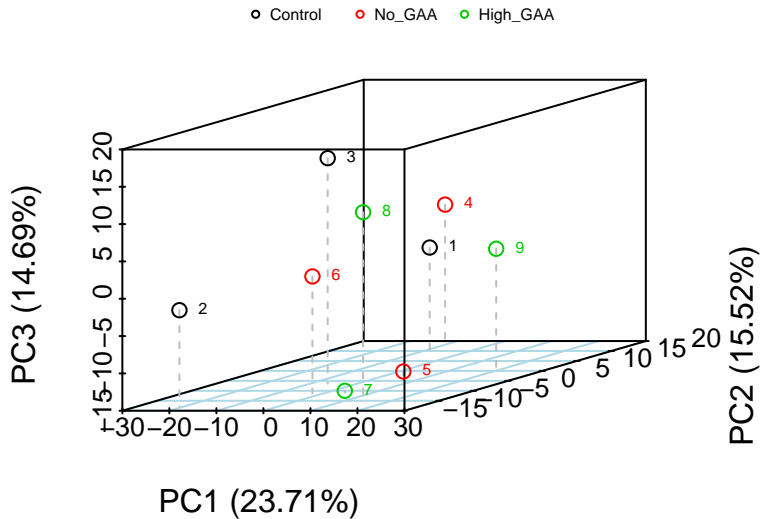

Supplement: Data_Sheet_1.ZIP [file Data_Sheet_1.ZIP]

High\_GAA.vs.Control

Metabolites

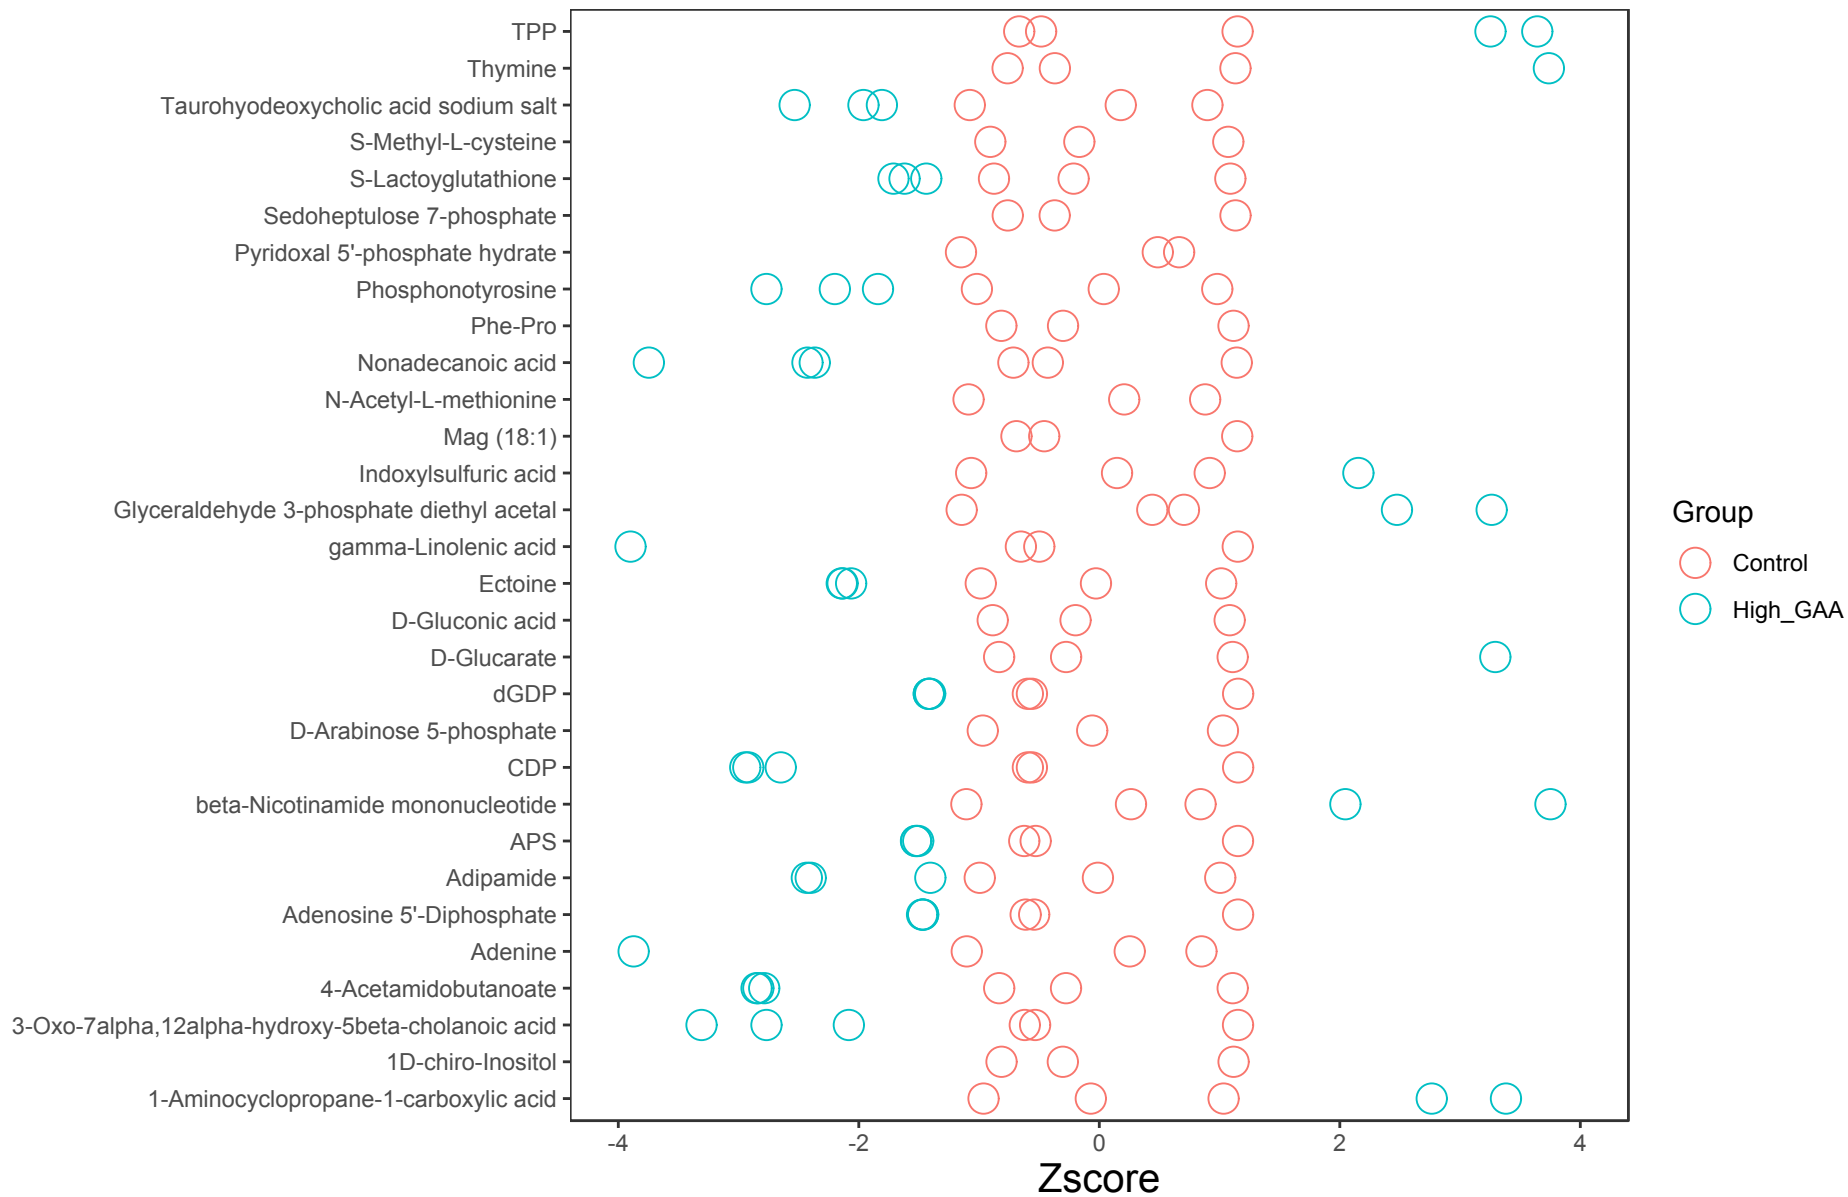

Supplement: Data_Sheet_1.ZIP [file Data_Sheet_1.ZIP]

No\_GAA.vs.Control



Supplement: Data_Sheet_1.ZIP [file Data_Sheet_1.ZIP]

## HMDB annotation

### HMDB

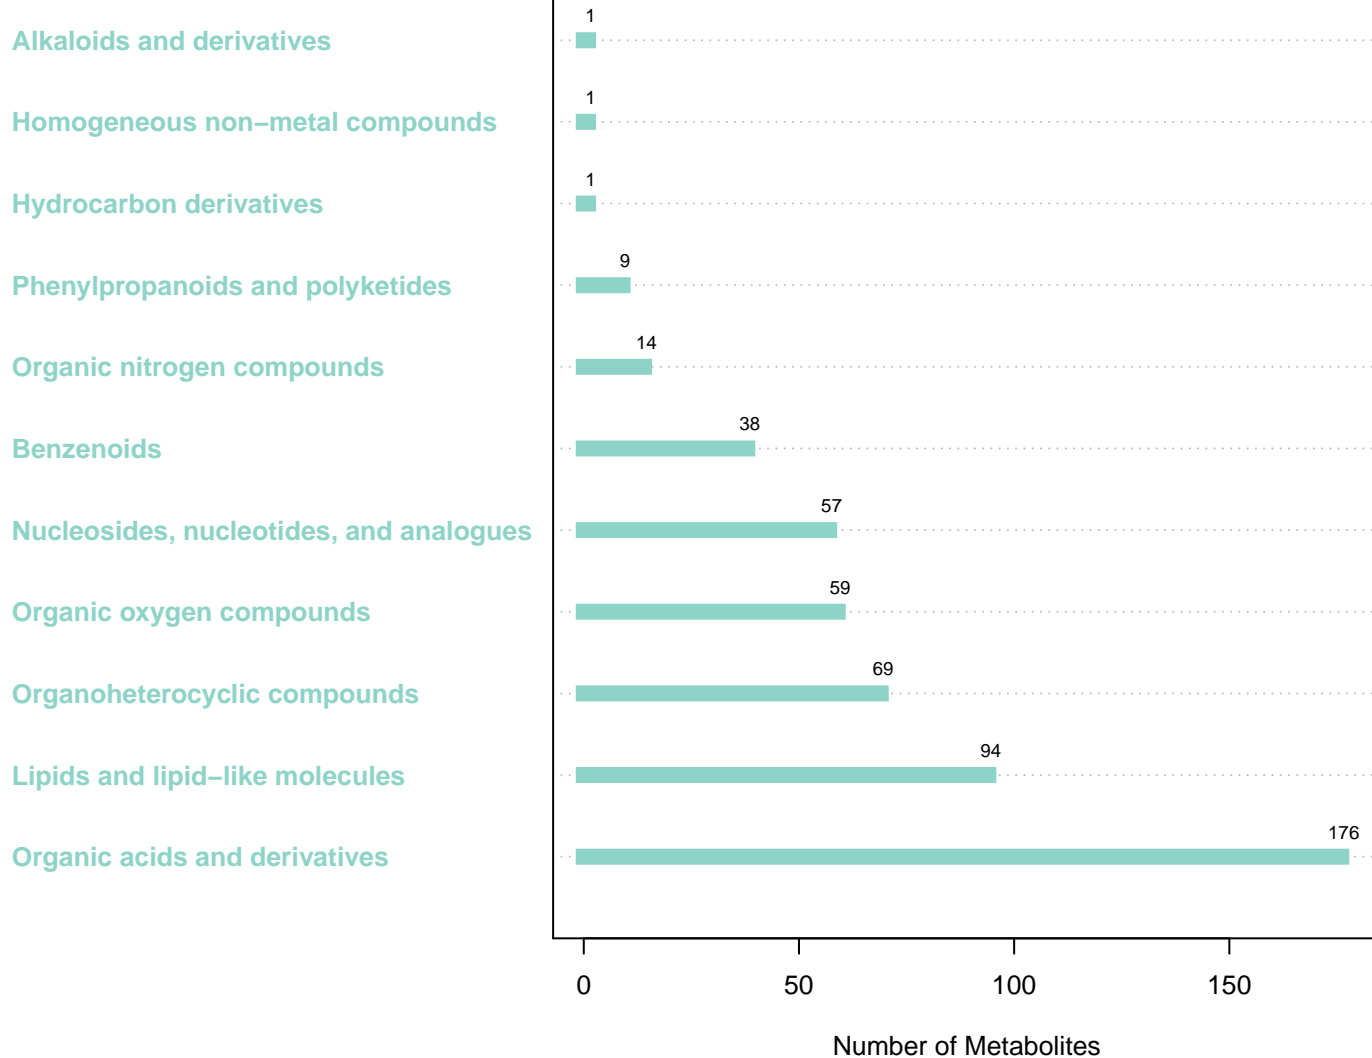

Supplement: Data_Sheet_1.ZIP [file Data_Sheet_1.ZIP]

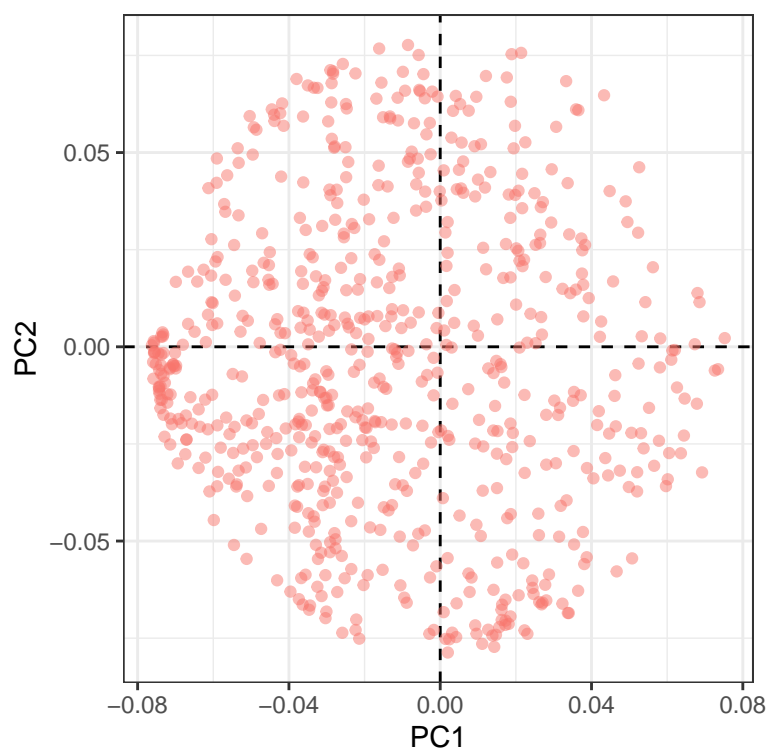

Supplement: Data_Sheet_1.ZIP [file Data_Sheet_1.ZIP]

High\_GAA.vs.No\_GAA



Supplement: Data_Sheet_1.ZIP [file Data_Sheet_1.ZIP]

High\_GAA\_No\_GAA  
Intercepts:R2=(0.0,1.00), Q2=(0.0,-0.80)

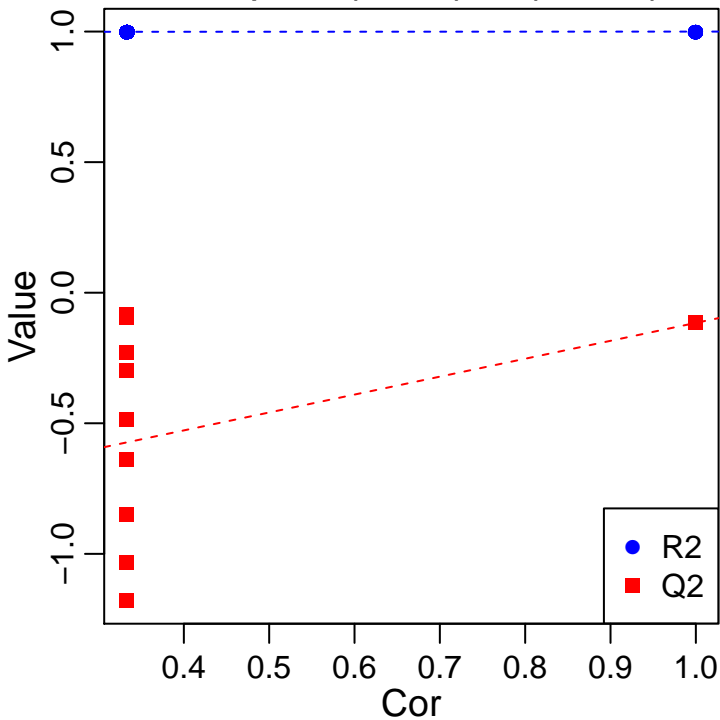

Supplement: Data_Sheet_1.ZIP [file Data_Sheet_1.ZIP]

High\_GAA.vs.Control

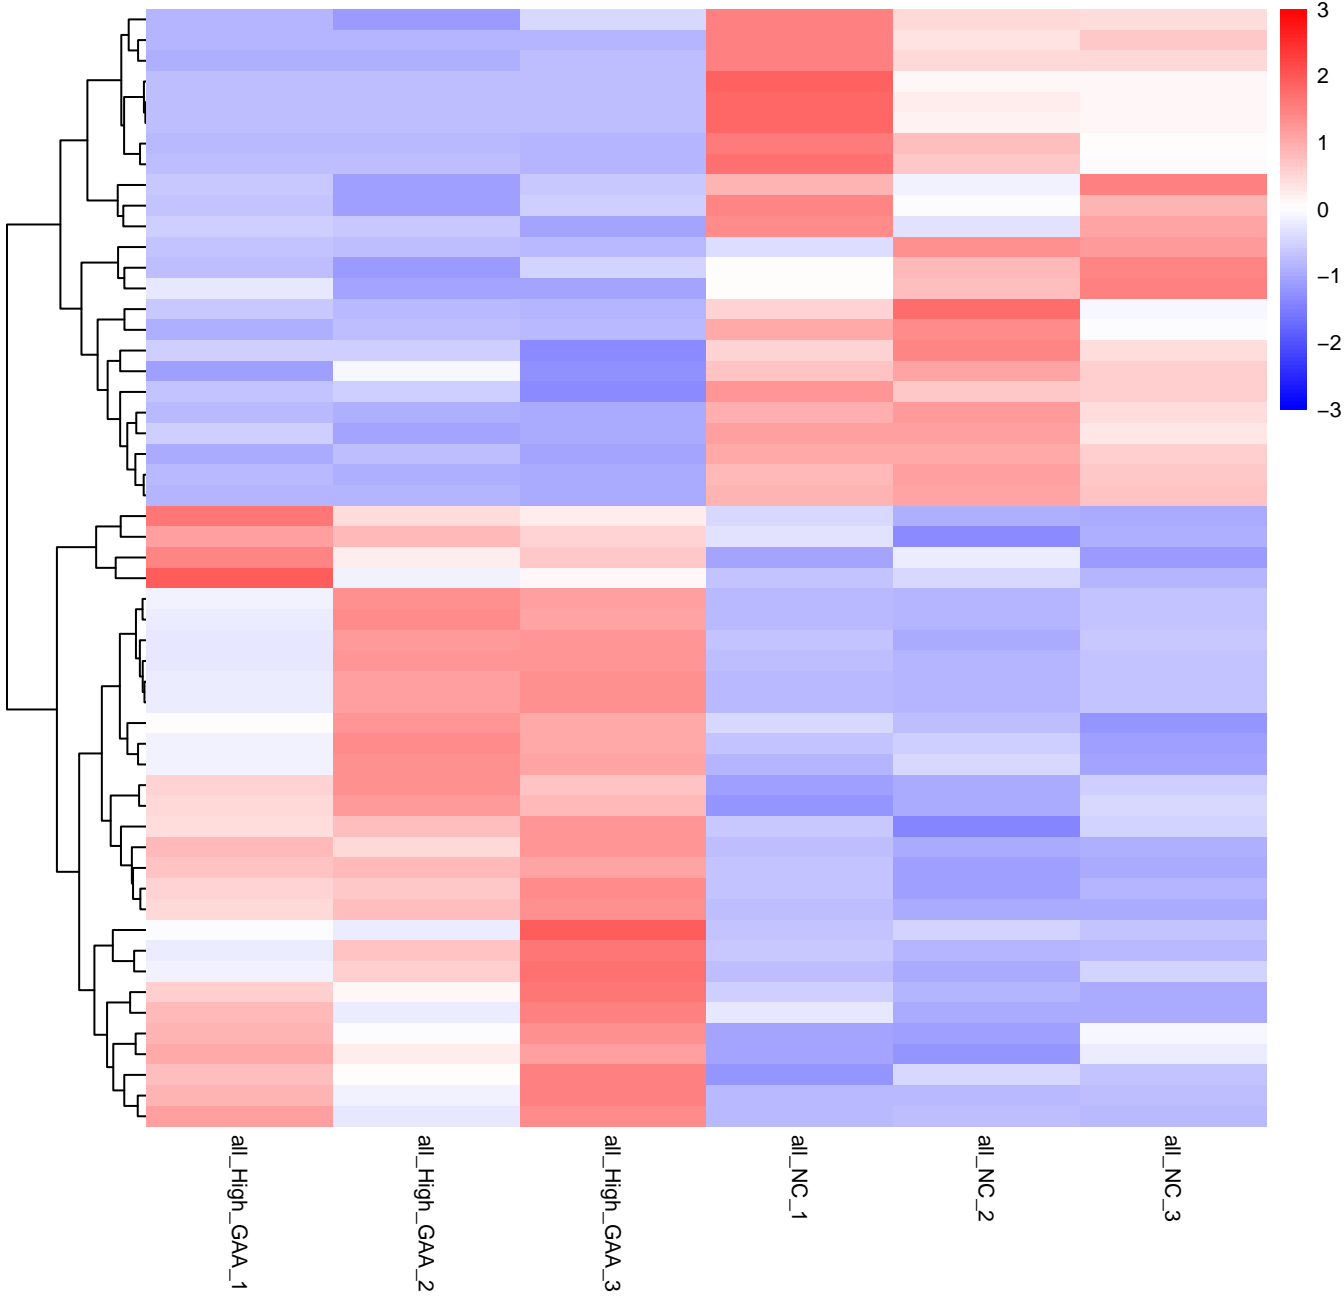

Supplement: Data_Sheet_1.ZIP [file Data_Sheet_1.ZIP]
